# Supplementary material
Source: PubMed Central journal article supplement (PMC7153518)
Supplement: NIHMS1067696-supplement-Supplementary_materials.pdf [file NIHMS1067696-supplement-Supplementary_materials.pdf]

## Supporting Information

### Structure-based design of novel biphenyl amide antagonists of human Transient Receptor Potential Cation Channel Subfamily M Member 8 channels with potential implications in the treatment of sensory neuropathies

*V. Blair Journigan,<sup>\*,†,‡</sup> Zhiwei Feng,<sup>||,⊥,#</sup> Saifur Rahman,<sup>§</sup> Yuanqiang Wang,<sup>||,⊥,#</sup> A. R. M. Ruhul Amin,<sup>†,‡</sup> Colleen E. Heffner,<sup>†</sup> Nicholas Bachtel,<sup>†</sup> Siyi Wang,<sup>||,⊥,#</sup> Sara Gonzalez-Rodriguez,<sup>||</sup> Asia Fernández-Carvajal,<sup>||</sup> Gregorio Fernández-Ballester,<sup>||</sup> Jacob K. Hilton,<sup>∇,◊</sup> Wade D. Van Horn,<sup>∇,◊</sup> Antonio Ferrer-Montiel,<sup>||</sup> Xiang-Qun Xie,<sup>\*,||,⊥,#</sup> and Taufiq Rahman<sup>\*,§</sup>*

#### Table of Contents

**Figure S1.** Sequence alignment of S1-S4 helices (VSLD), S5-S6 helices (pore domain), pore helix (PH) and TRP helix for collared flycatcher (avian), human and rat

TRPM8.....S5

**Figure S2a.** Concentration - response curve for icilin in HEK293 stably expressing hTRPM8 cells.....S6

**Figure S2b.** Concentration-response curve of (–) menthol-evoked Ca<sup>2+</sup> entry in HEK-293-hTRPM8 cells.....S6-7

**Figure S3.** Evaluation of the effect of compounds on icilin-evoked Ca<sup>2+</sup> entry in HEK-293 cells stably expressing human TRPM8.....S8-S9

**Figure S4.** Concentration - response curve of RQ-00203078.....S9

**Figure S5.** Concentration - response curve of **14**.....S10

**Figure S6a.** Typical trace presenting the effect of compound **14** (3 nM) on (–)-menthol (100 μM)-evoked Ca<sup>2+</sup> entry.....S11

**Figure S6b.** Evaluation of the effect of 3 nM of compound **14** on (–)-menthol-evoked Ca<sup>2+</sup> entry.....S11

|                                                                                                            |        |
|------------------------------------------------------------------------------------------------------------|--------|
| <b>Figure S7.</b> Intrinsic hTRPM8 activity of selected biphenyl amide analogs.....                        | S12    |
| <b>Table S1.</b> TRPA1 Agonist Data (Percentage Activation Normalized to $E_{max}$ Control).....           | S12    |
| <b>Figure S8.</b> Agonist dose-response of AITC-activation of hTRPA1.....                                  | S13    |
| <b>Table S2.</b> TRPA1 Antagonist Data (Percentage Inhibition Normalized to $EC_{80}$ Control).....        | S13    |
| <b>Figure S9.</b> Ruthenium red blockade of AITC-activated (10 $\mu$ M) hTRPA1 responses.....              | S14    |
| <b>Table S3.</b> TRPV1 Agonist Data (Percentage Activation Normalized to $E_{max}$ Control).....           | S14    |
| <b>Figure S10.</b> Agonist dose-response of capsaicin-activation of hTRPV1.....                            | S15    |
| <b>Table S4.</b> TRPV1 Antagonist Data (Percentage Inhibition Normalized to $EC_{80}$ Control).....        | S15    |
| <b>Figure S11.</b> Capsazepine blockade of capsaicin-activated (100 nM) hTRPV1 responses.....              | S16    |
| <b>Table S5.</b> Stability of compound <b>14</b> in mouse liver microsomes.....                            | S16    |
| <b>Figure S12.</b> LCMS trace of N-(2-isopropyl-5-methylcyclohexyl)-[1,1'-biphenyl]-4-carboxamide (2)..... | S17-18 |

|                                                                                                                                                |        |
|------------------------------------------------------------------------------------------------------------------------------------------------|--------|
| <b>Figure S13.</b> <sup>1</sup> H NMR spectrum of N-(2-isopropyl-5-methylcyclohexyl)-[1,1'-biphenyl]-4-carboxamide ( <b>2</b> ).....           | S19    |
| <b>Figure S14.</b> LCMS trace of N-(2-isopropyl-5-methylcyclohexyl)-[1,1'-biphenyl]-4-carboxamide (Isomer <b>2A</b> ).....                     | S20    |
| <b>Figure S15.</b> <sup>1</sup> H NMR spectrum of N-(2-isopropyl-5-methylcyclohexyl)-[1,1'-biphenyl]-4-carboxamide (Isomer <b>2A</b> ).....    | S21    |
| <b>Figure S16.</b> LCMS trace of N-(2-isopropyl-5-methylcyclohexyl)-[1,1'-biphenyl]-4-carboxamide (Isomer <b>2B</b> ).....                     | S22    |
| <b>Figure S17.</b> <sup>1</sup> H NMR spectrum of N-(2-isopropyl-5-methylcyclohexyl)-[1,1'-biphenyl]-4-carboxamide (Isomer <b>2B</b> ).....    | S23    |
| <b>Figure S18.</b> LCMS trace of N-(2-isopropyl-5-methylcyclohexyl)-[1,1'-biphenyl]-4-carboxamide (Isomer <b>2C</b> ).....                     | S24-25 |
| <b>Figure S19.</b> <sup>1</sup> H NMR spectrum of N-(2-isopropyl-5-methylcyclohexyl)-[1,1'-biphenyl]-4-carboxamide (Isomer <b>2C</b> ).....    | S26    |
| <b>Figure S20.</b> LCMS trace of N-(decahydronaphthalen-2-yl)-[1,1'-biphenyl]-4-carboxamide ( <b>10</b> ).....                                 | S27    |
| <b>Figure S21.</b> <sup>1</sup> H NMR spectrum of N-(decahydronaphthalen-2-yl)-[1,1'-biphenyl]-4-carboxamide ( <b>10</b> ).....                | S28    |
| <b>Figure S22.</b> LCMS trace of N-((2SR,9RS,10SR)-decahydronaphthalen-2-yl)-[1,1'-biphenyl]-4-carboxamide ( <b>12</b> ).....                  | S29    |
| <b>Figure S23.</b> <sup>1</sup> H NMR spectrum of N-((2SR,9RS,10SR)-decahydronaphthalen-2-yl)-[1,1'-biphenyl]-4-carboxamide ( <b>12</b> )..... | S30    |

|                                                                                                                                                                                        |         |
|----------------------------------------------------------------------------------------------------------------------------------------------------------------------------------------|---------|
| <b>Figure S24.</b> $^{13}\text{C}$ NMR spectrum of N-((2SR,9RS,10SR)-decahydronaphthalen-2-yl)-[1,1'-biphenyl]-4-carboxamide ( <b>12</b> , single isomer).....                         | S31     |
| <b>Figure S25.</b> NOESY spectrum of N-((2SR,9RS,10SR)-decahydronaphthalen-2-yl)-[1,1'-biphenyl]-4-carboxamide ( <b>12</b> , single isomer).....                                       | S32     |
| <b>Figure S26.</b> $^1\text{H}$ NMR spectrum of N-((2SR,9RS,10SR)-decahydronaphthalen-2-yl)-[1,1'-biphenyl]-4-carboxamide ( <b>12</b> , single isomer).....                            | S33     |
| <b>Figure S27.</b> gCOSY spectrum of N-((2SR,9RS,10SR)-decahydronaphthalen-2-yl)-[1,1'-biphenyl]-4-carboxamide ( <b>12</b> , single isomer).....                                       | S34     |
| <b>Figure S28.</b> gH2BCAD spectrum of N-((2SR,9RS,10SR)-decahydronaphthalen-2-yl)-[1,1'-biphenyl]-4-carboxamide ( <b>12</b> , single isomer).....                                     | S35     |
| <b>Figure S29.</b> gHMBCAD spectrum of N-((2SR,9RS,10SR)-decahydronaphthalen-2-yl)-[1,1'-biphenyl]-4-carboxamide ( <b>12</b> , single isomer).....                                     | S36     |
| <b>Figure S30.</b> gHSQCAD spectrum of N-((2SR,9RS,10SR)-decahydronaphthalen-2-yl)-[1,1'-biphenyl]-4-carboxamide ( <b>12</b> , single isomer).....                                     | S37     |
| <b>Table S6.</b> Assignment of $^1\text{H}$ - and $^{13}\text{C}$ -NMR chemical shifts of N-((2SR,9RS,10SR)-decahydronaphthalen-2-yl)-[1,1'-biphenyl]-4-carboxamide ( <b>12</b> )..... | S38     |
| <b>Figure S31.</b> Coordinates for human TRPM8 computational model.....                                                                                                                | S39-308 |

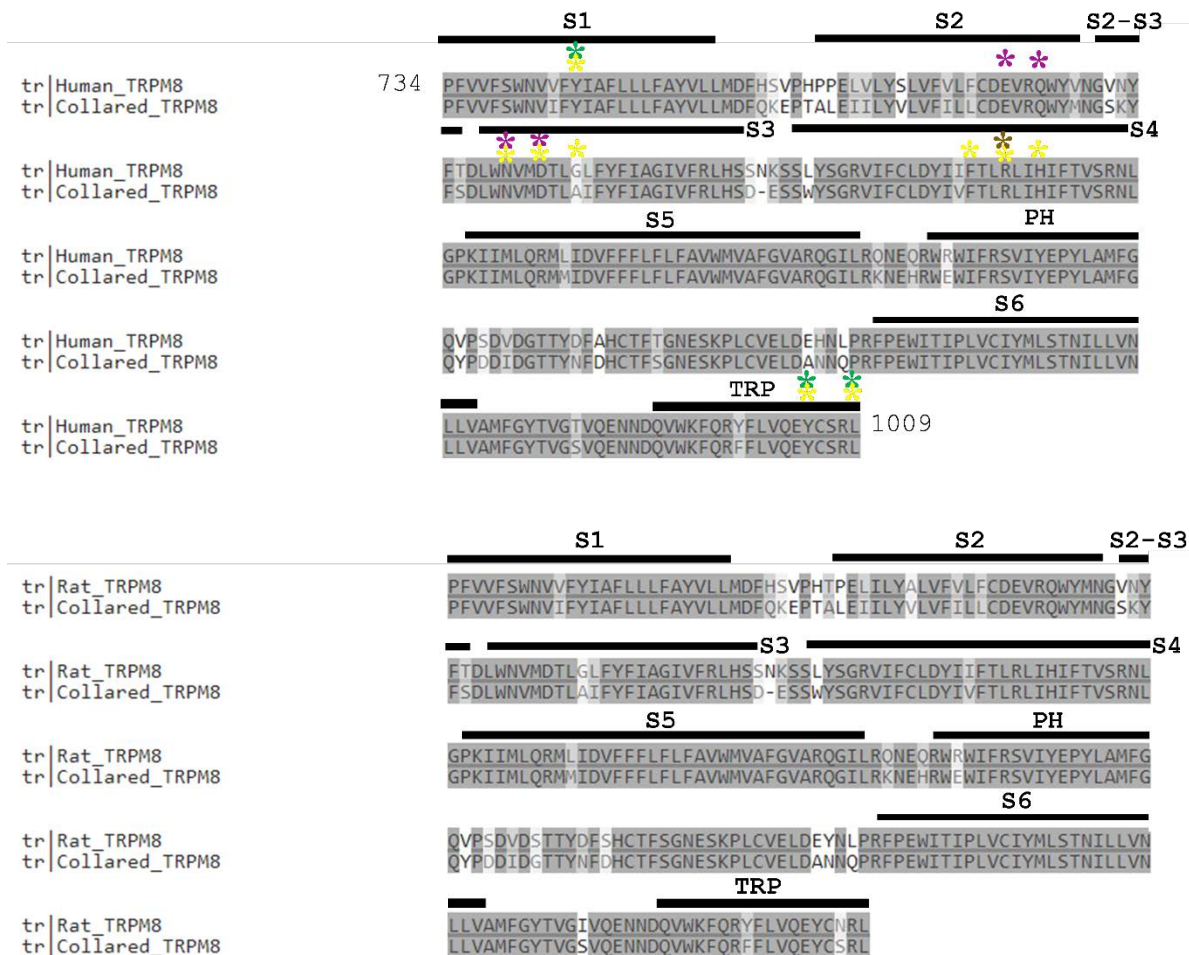

**Figure S1.** Sequence alignment of S1-S4 helices (VSLD), S5-S6 helices (pore domain), pore helix (PH) and TRP helix for collared flycatcher (avian), human and rat TRPM8. The VSLD domain (S1-S4), pore domain (S5-S6, and pore helix PH) and TRP helix from full sequence of TRPM8<sub>FA</sub> (U3JD03, 1103 residues), hTRPM8 (Q7Z2W7, 1104 residues) and rTRPM8 (Q8R455, 1104 residues) was retrieved from the UniProtKB / Swiss-Prot (<http://www.uniprot.org/uniprot/>), and the three domains were aligned using the Clustal Omega program (<https://www.uniprot.org/align/>). Similar amino acids are highlighted. TRPM8<sub>FA</sub> is highly homologous to human and rat TRPM8 in the aforementioned region (86% and 87% sequence identity, respectively). Asterisks denote residues sensitive to menthol (green), icilin (yellow), voltage (gold) and Ca<sup>2+</sup> (magenta).

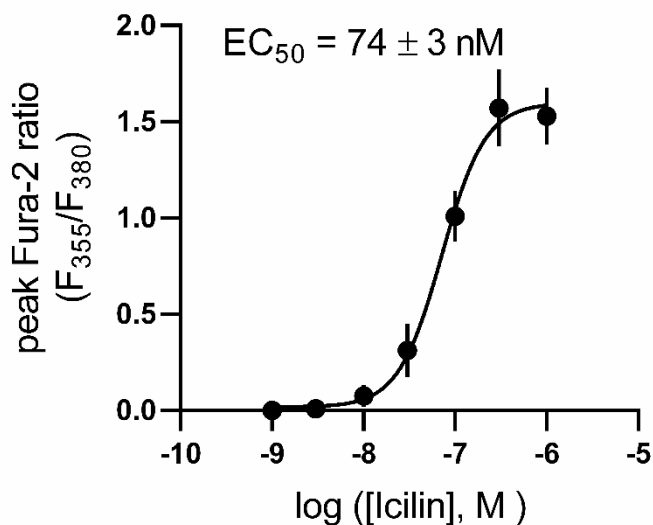

**Figure S2a.** Concentration - response curve for icilin in HEK293 stably expressing hTRPM8 cells. Response was reported by peak fluorescence (Fura-2) ratio indicative of maximum changes in intracellular free Ca<sup>2+</sup> concentrations at indicated concentrations of icilin. Each data point represents peak fluorescence ratio as mean ± SEM (n ≥ 30 cells from 3 independent experiments done in three different days).

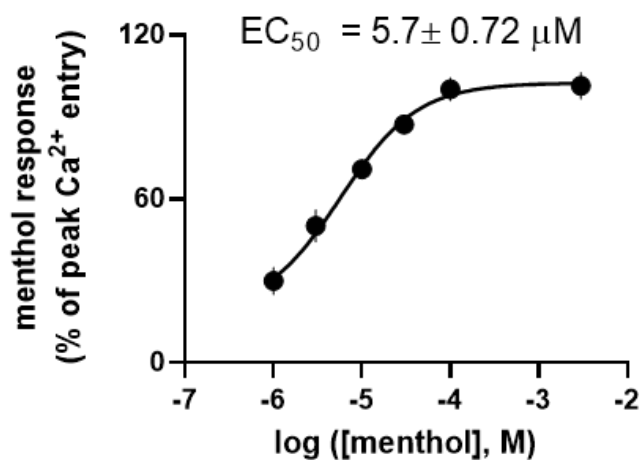

**Figure S2b.** Concentration-response curve of (-) menthol-evoked Ca<sup>2+</sup> entry in HEK-293-hTRPM8 cells. Each data point represents mean response at cognate concentration expressed as a percent of the maximum Ca<sup>2+</sup> entry in a Fura-2 based Ca<sup>2+</sup> imaging assay. The error bars indicate

SEM ( $n \geq 35$  cells from 3 independent experiments done in three different days). The line represents a four parameter logistic curve fit done using Prism 7 (Graphpad Inc.).

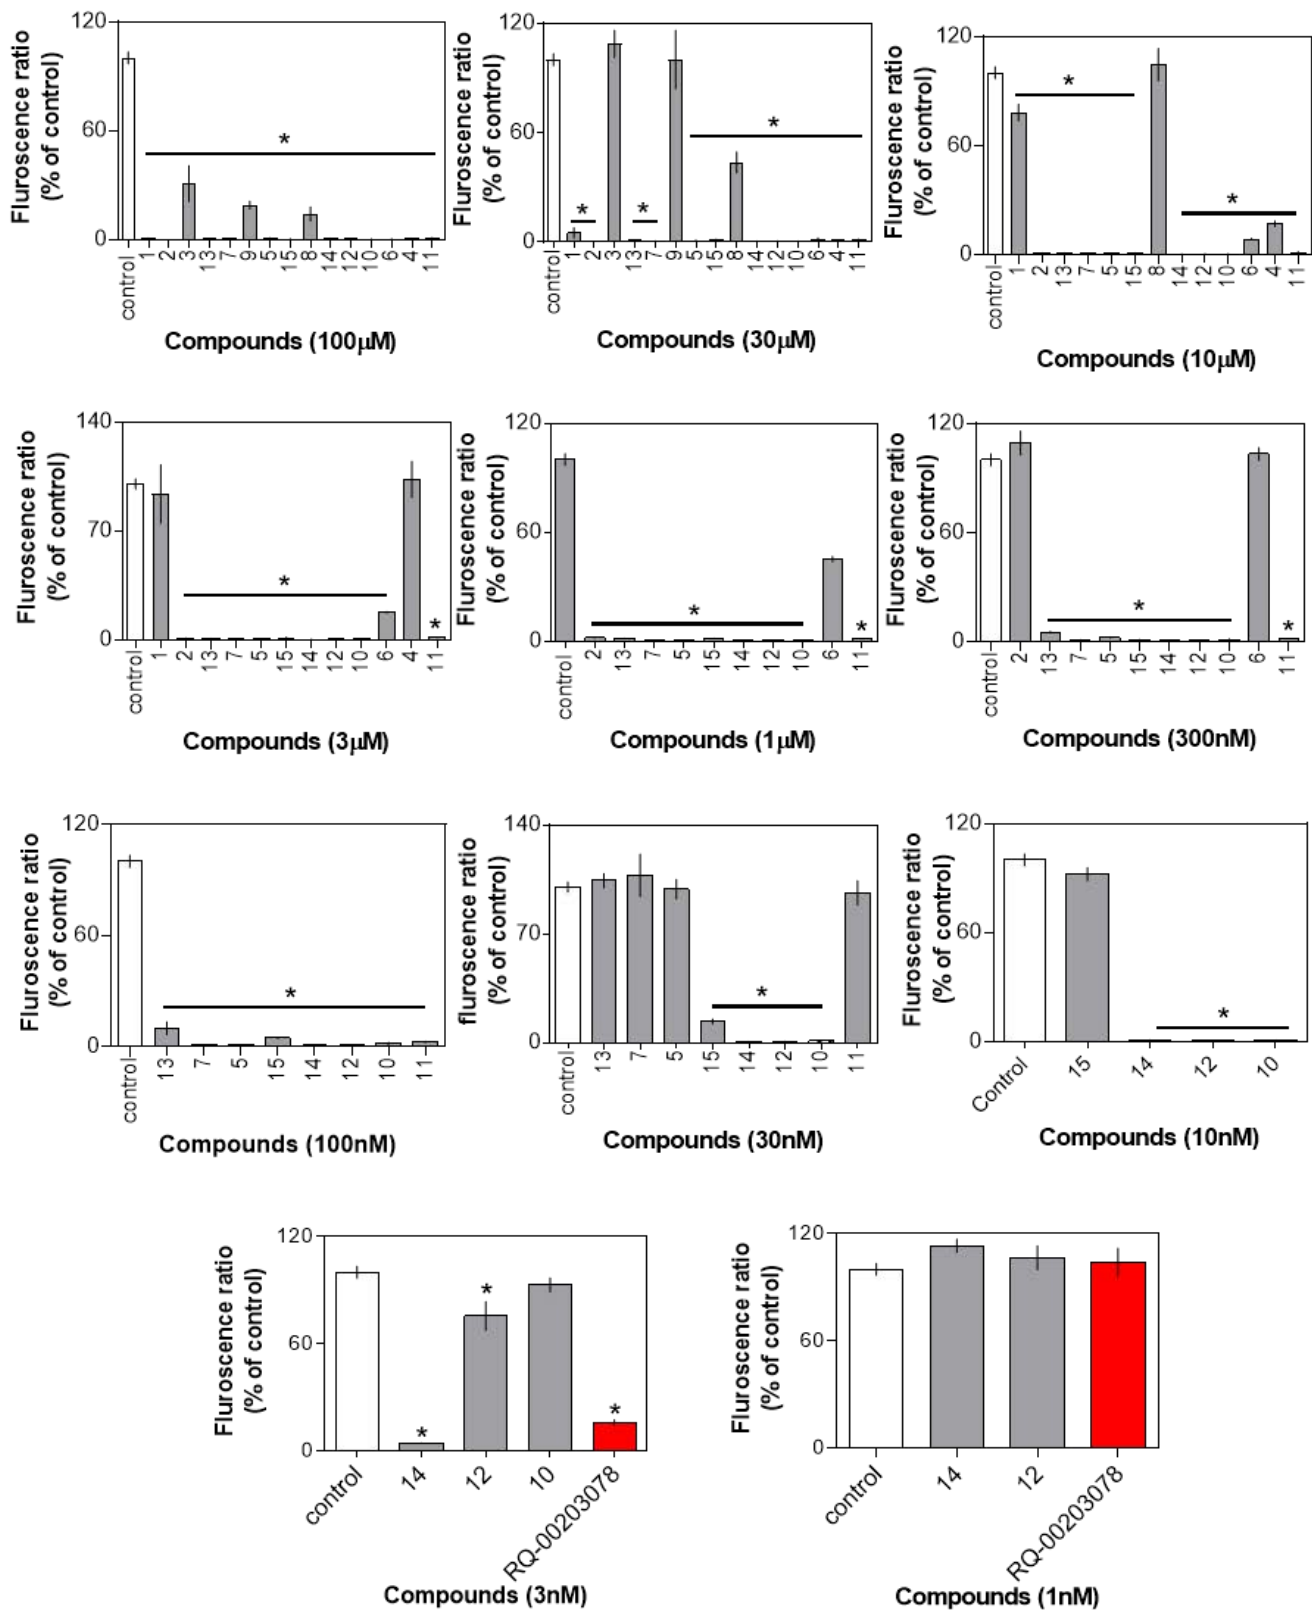

**Figure S3.** Evaluation of the effect of compounds on icilin-evoked  $\text{Ca}^{2+}$  entry in HEK-293 cells stably expressing human TRPM8. Each bar represents peak Fura-2 ratio normalized to that of the



icilin (500 nM) response and expressed as mean  $\pm$  SEM ( $n \geq 35$  cells from 3 independent experiments done in three different days). One way ANOVA followed by Dunnett's test was used to compare the efficacy of the test compounds with respect to that of the control (icilin), \* $P < 0.001$ .

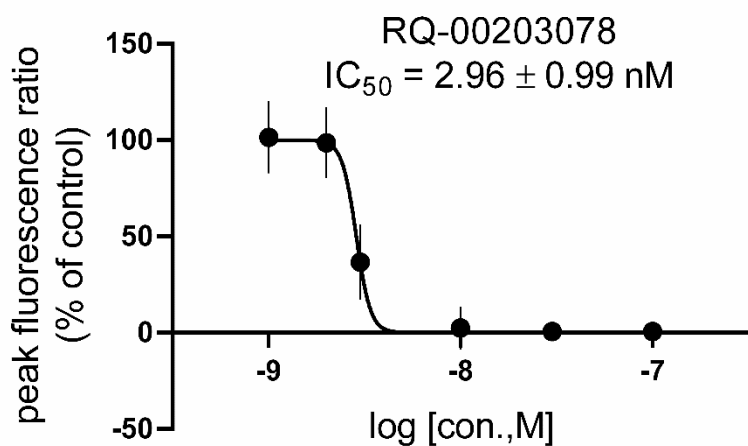

**Figure S4.** Concentration - response curve of RQ-00203078. Response was reported by peak fluorescence (Fura-2) ratio normalized to the peak response triggered by 500 nM icilin alone. Each data point represents mean  $\pm$  SEM ( $n \geq 30$  cells from 3 independent experiments done in three different days).

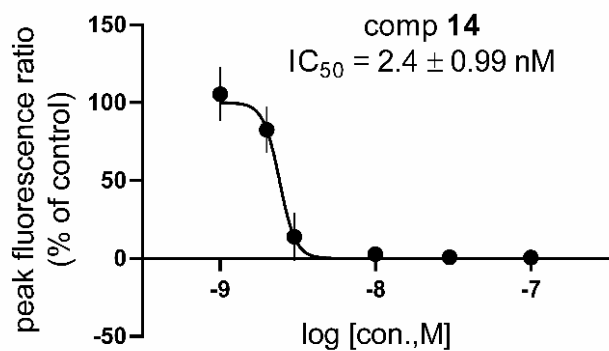

**Figure S5.** Concentration - response curve of **14**. Response was reported by peak fluorescence (Fura-2) ratio normalized to the peak response triggered by 500 nM icilin alone. Each data point represents mean  $\pm$  SEM ( $n \geq 30$  cells from 3 independent experiments done in three different days).

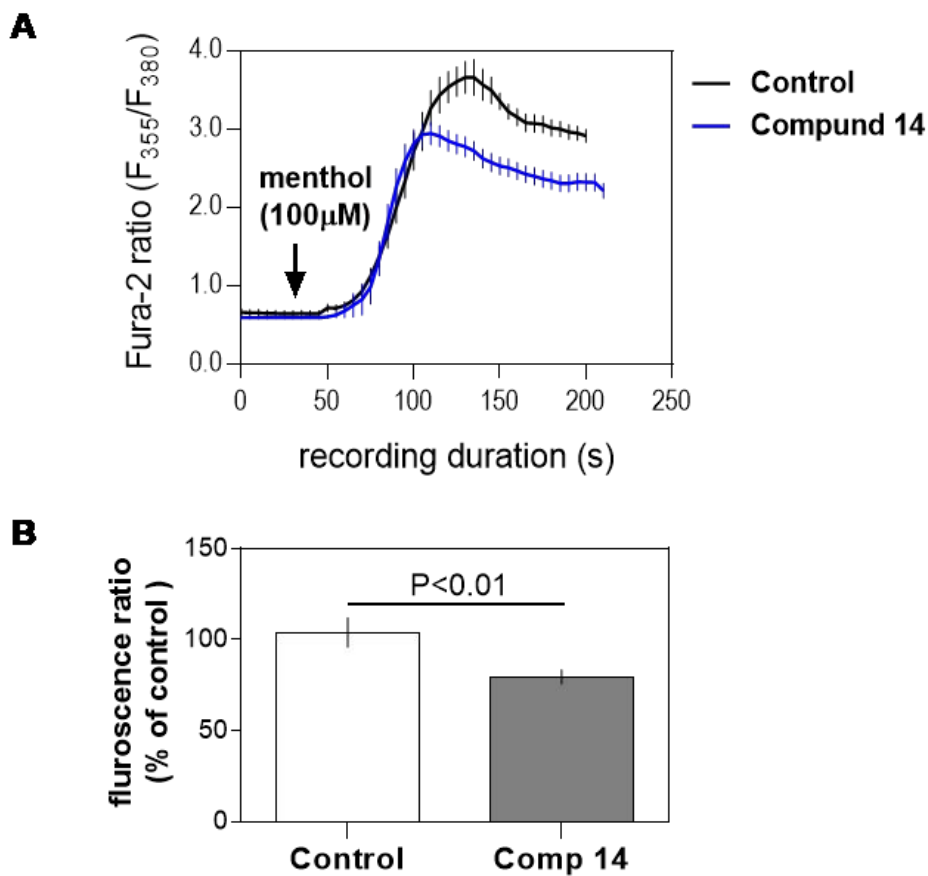

**Figure S6a.** Typical trace presenting the effect of compound 14 (3 nM) on (-)-menthol (100  $\mu$ M)-evoked  $\text{Ca}^{2+}$  entry signals using Fura-2 based  $\text{Ca}^{2+}$  imaging of HEK-293-hTRPM8 cells. Each data points represent mean  $\pm$  SEM ( $n \geq 35$  cells from 3 independent experiments done in three different days).

**Figure S6b.** Evaluation of the effect of 3 nM of compound 14 on (-) menthol-evoked  $\text{Ca}^{2+}$  entry in HEK-293-hTRPM8. Each bar represents peak Fura-2 ratio normalized to that of the menthol (100  $\mu$ M) response and expressed as mean  $\pm$  SEM ( $n \geq 35$  cells from 3 independent experiments done in three different days). The mean responses between two groups were compared using Student's t- test, 2 tailed, unpaired.

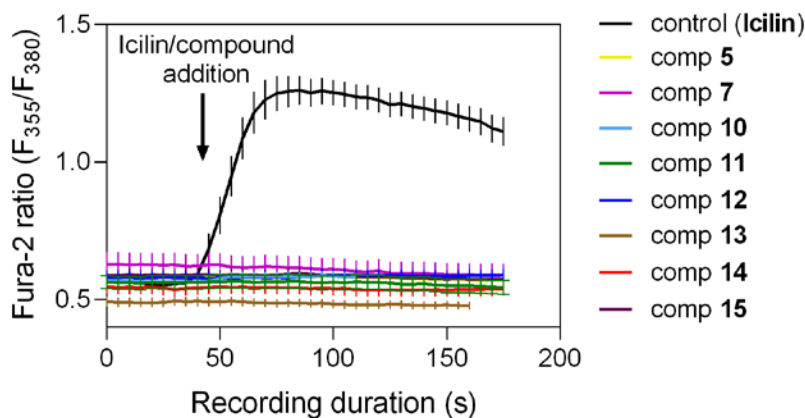

**Figure S7.** Intrinsic hTRPM8 activity of selected biphenyl amide analogs. Fura-2 based ratiometric  $\text{Ca}^{2+}$  imaging was performed using  $\text{Ca}^{2+}$  (2 mM) containing extracellular solution. Each data point represents mean  $\pm$  SEM ( $n \geq 20$  cells from 3 independent experiments done in three different days).

**Table S1. TRPA1 Agonist Data (Percentage Activation Normalized to  $E_{\text{max}}$  Control)**

All data are normalized to the  $E_{\text{max}}$  for the reference agonist AITC.

| Compd        | Conc (nM) | % Activation<br>Mean $\pm$ SEM (n = 5) |
|--------------|-----------|----------------------------------------|
| AITC         | 100       | -0.8 $\pm$ 0.4                         |
|              | 300       | -0.5 $\pm$ 0.2                         |
|              | 1,000     | -0.5 $\pm$ 0.2                         |
|              | 3,000     | -1.2 $\pm$ 0.2                         |
|              | 10,000    | 68.8 $\pm$ 2.9                         |
|              | 30,000    | 78.5 $\pm$ 1.0                         |
|              | 100,000   | 94.2 $\pm$ 2.4                         |
|              | 300,000   | 100.0 $\pm$ 1.3*                       |
| DMSO control | 0.33%     | 0.0                                    |

\*n = 10

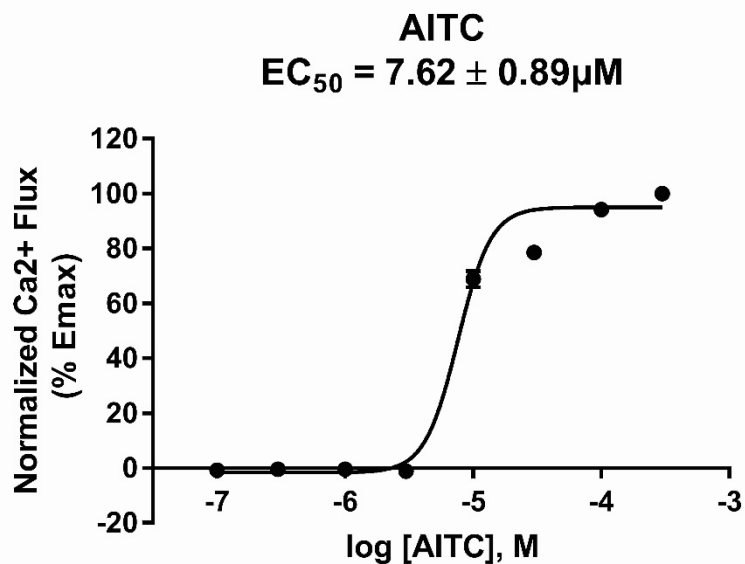

**Figure S8. Agonist dose-response of AITC-activation of hTRPA1.**

EC<sub>50</sub> = 7.62 ± 0.89 μM. Each data point represents mean ± SEM, n = 5 or 10 independent experiments

**Table S2. TRPA1 Antagonist Data (Percentage Inhibition Normalized to EC<sub>80</sub> Control)**

All data are normalized to the EC<sub>80</sub> for the reference agonist AITC.

| Compd                 | Conc (nM) | % Inhibition<br>Mean ± SEM (n = 5) |
|-----------------------|-----------|------------------------------------|
|                       | 3         | -6.0 ± 1.2                         |
|                       | 10        | 1.9 ± 2.4                          |
| Ruthenium             | 30        | 5.8 ± 4.6                          |
| Red                   | 100       | 15.7 ± 9.8                         |
|                       | 300       | 91.1 ± 2.9                         |
|                       | 1,000     | 100.9 ± 0.1                        |
|                       | 3,000     | 100.9 ± 0.7                        |
|                       | 10,000    | 100.8 ± 0.3                        |
| AITC EC <sub>80</sub> | 10,000    | 100                                |
| DMSO control          | 0.33%     | 0.0                                |

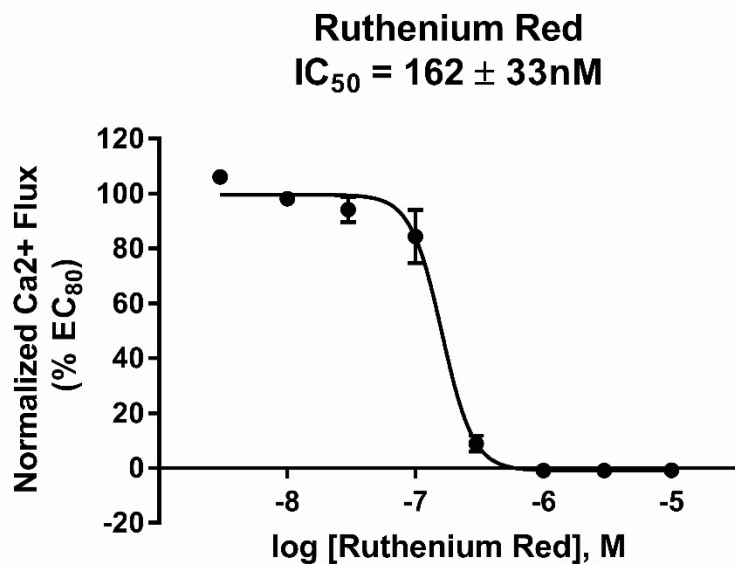

**Figure S9. Ruthenium red blockade of AITC-activated (10  $\mu$ M) hTRPA1 responses.**

IC<sub>50</sub> = 162 ± 33 nM. Each data point represents mean ± SEM, n = 5 independent experiments.

**Table S3. TRPV1 Agonist Data (Percentage Activation Normalized to E<sub>max</sub> Control)**

All data are normalized to the E<sub>max</sub> for the reference agonist Capsaicin.

| Compd        | Conc (nM) | % Activation       |
|--------------|-----------|--------------------|
|              |           | Mean ± SEM (n = 5) |
| Capsaicin    | 1         | -0.2 ± 1.0         |
|              | 3         | -1.7 ± 0.7         |
|              | 10        | 15.2 ± 0.6         |
|              | 30        | 72.4 ± 2.3         |
|              | 100       | 81.4 ± 3.3         |
|              | 300       | 91.8 ± 3.7         |
|              | 1,000     | 101.6 ± 2.0        |
|              | 3,000     | 100.0 ± 1.8*       |
| DMSO control | 0.33%     | 0.0                |

\*n = 10

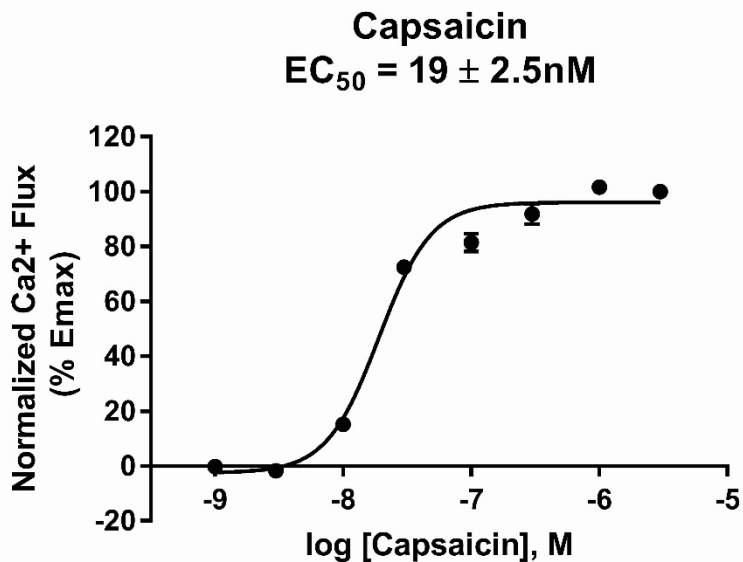

**Figure S10. Agonist dose-response of capsaicin-activation of hTRPV1.**

EC<sub>50</sub> = 19 ± 2.5 nM. Each data point represents mean ± SEM, n = 5 or 10 independent experiments

**Table S4. TRPV1 Antagonist Data (Percentage Inhibition Normalized to EC<sub>80</sub> Control)**

All data are normalized to the EC<sub>80</sub> for the reference agonist Capsaicin.

**TRPV1 Antagonist assay: Capsazepine reference control**

| Compd                      | Conc (nM) | % Inhibition<br>Mean ± SEM (n = 5) |
|----------------------------|-----------|------------------------------------|
| Capsazepine                | 3         | 1.6 ± 4.2                          |
|                            | 10        | 0.1 ± 1.3                          |
|                            | 30        | 1.1 ± 1.7                          |
|                            | 100       | 7.1 ± 2.2                          |
|                            | 300       | 23.4 ± 2.5                         |
|                            | 1,000     | 94.2 ± 1.1                         |
|                            | 3,000     | 100.6 ± 0.3                        |
|                            | 10,000    | 101.2 ± 0.5                        |
| Capsaicin EC <sub>80</sub> | 100       | 100                                |
| DMSO control               | 0.33%     | 0.0                                |

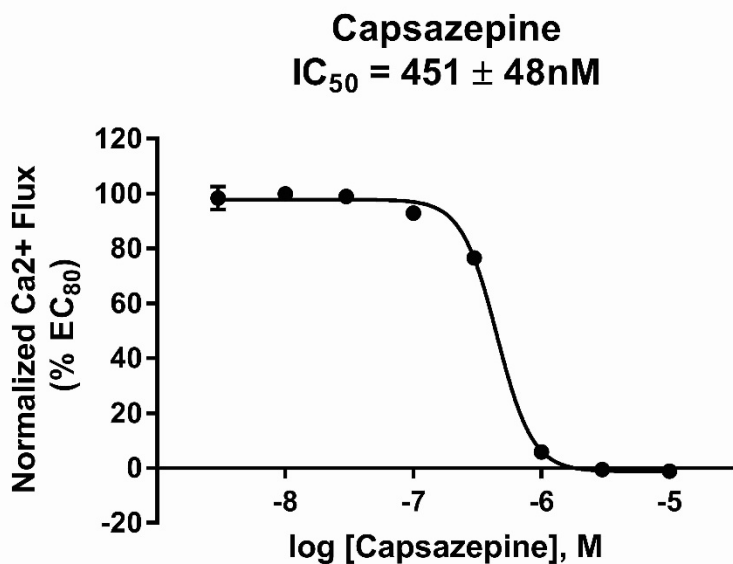

**Figure S11. Capsazepine blockade of capsaicin-activated (100 nM) hTRPV1 responses.**

IC<sub>50</sub> = 451 ± 48 nM. Each data point represents mean ± SEM, n = 5 independent experiments.

**Table S5. Stability of 14 in mouse liver microsomes.**

| Compd               | % Remaining of Initial (n=1) |        |        |        |        | Half-life (min) | CL <sub>int</sub> <sup>a</sup> (mL/min/mg protein) |
|---------------------|------------------------------|--------|--------|--------|--------|-----------------|----------------------------------------------------|
|                     | 0 min                        | 10 min | 20 min | 30 min | 60 min |                 |                                                    |
| <b>14</b>           | 100                          | 78     | 57     | 47     | 31     | 30              | 0.0455                                             |
| <b>testosterone</b> |                              |        |        |        |        | 3.7             | 0.372                                              |

<sup>a</sup> Intrinsic clearance (CL<sub>int</sub>) was calculated based on CL<sub>int</sub> = k/P, where k is the elimination rate constant and P is the protein concentration in the incubation.



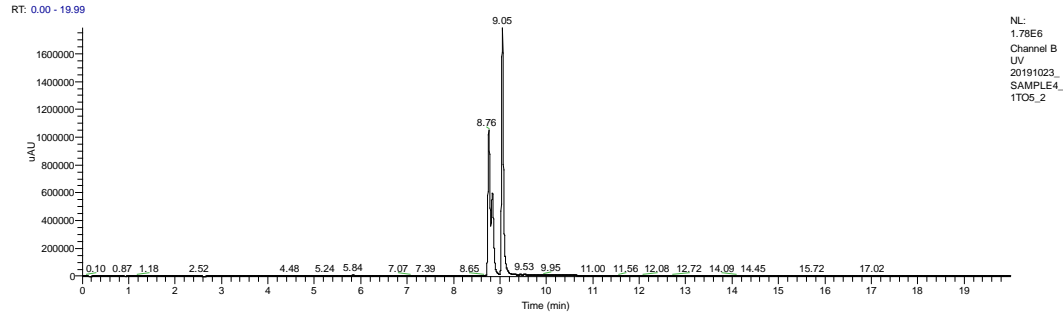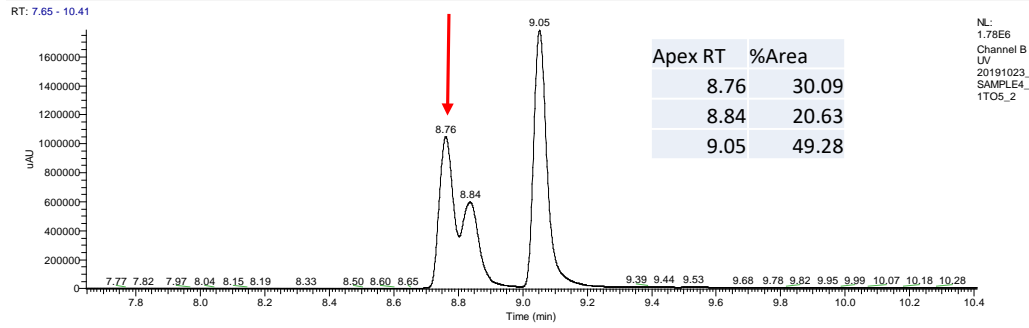

20191023\_SAMPLE4\_1TO5\_2 #1946-1955 RT: 8.74-8.78 AV: 10 SB: 163 7.71-8.43 NL: 9.89E7  
T: FTMS + p ESI Full ms [150.0000-1000.0000]

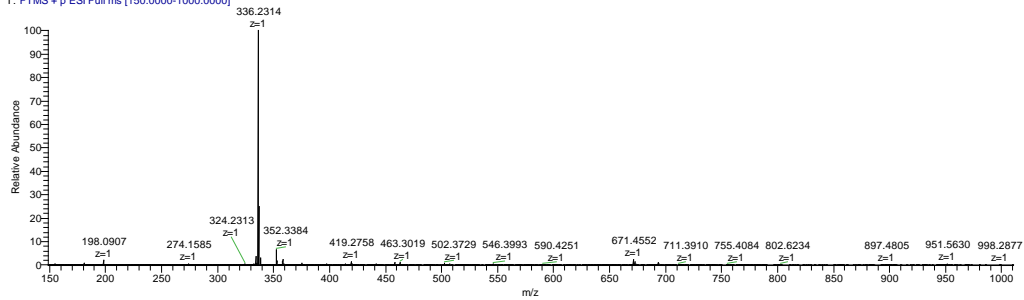

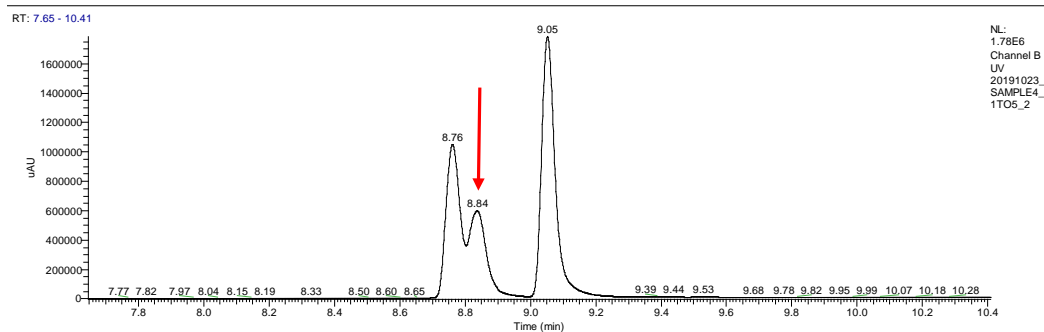

20191023\_SAMPLE4\_1T05\_2 #1962-1970 RT: 8.81-8.85 AV: 9 SB: 163 7.71-8.43 NL: 2.41E9  
T: FTMS + p ESI Full ms [150.0000-1000.0000]

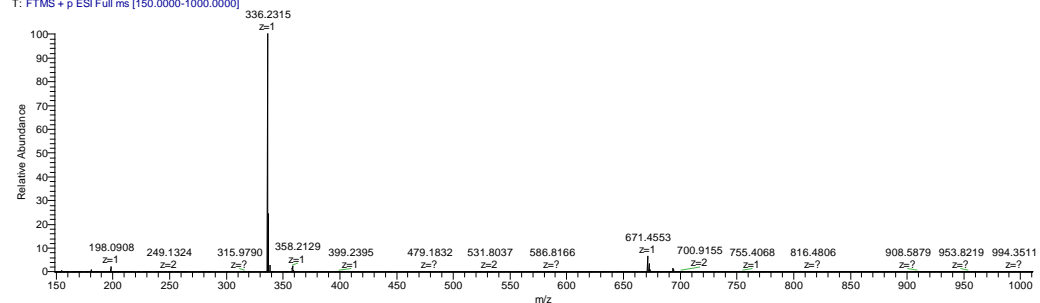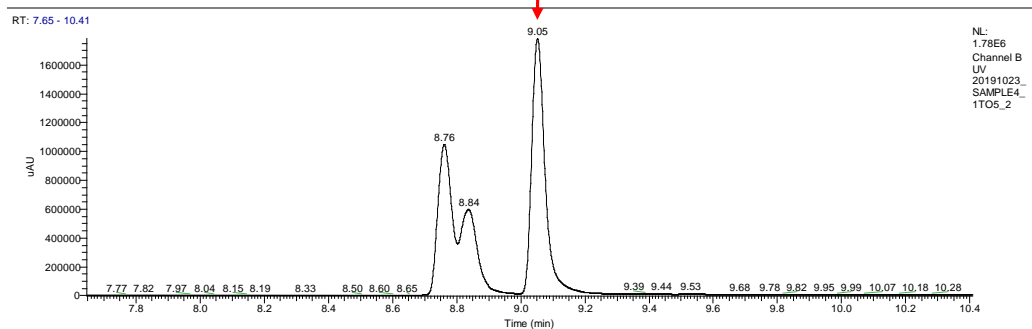

20191023\_SAMPLE4\_1T05\_2 #2009-2023 RT: 9.02-9.09 AV: 15 SB: 163 7.71-8.43 NL: 8.43E8  
T: FTMS + p ESI Full ms [150.0000-1000.0000]

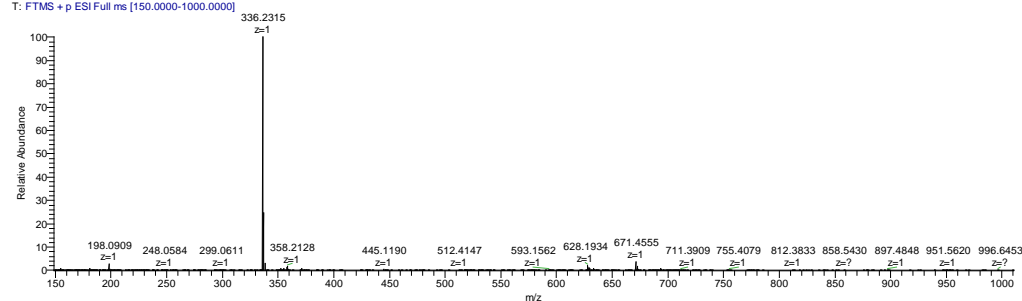

**Figure S12.** LCMS trace of N-(2-isopropyl-5-methylcyclohexyl)-[1,1'-biphenyl]-4-carboxamide (2, a mixture of three isomers present as a 30:21:49 ratio by LCMS).

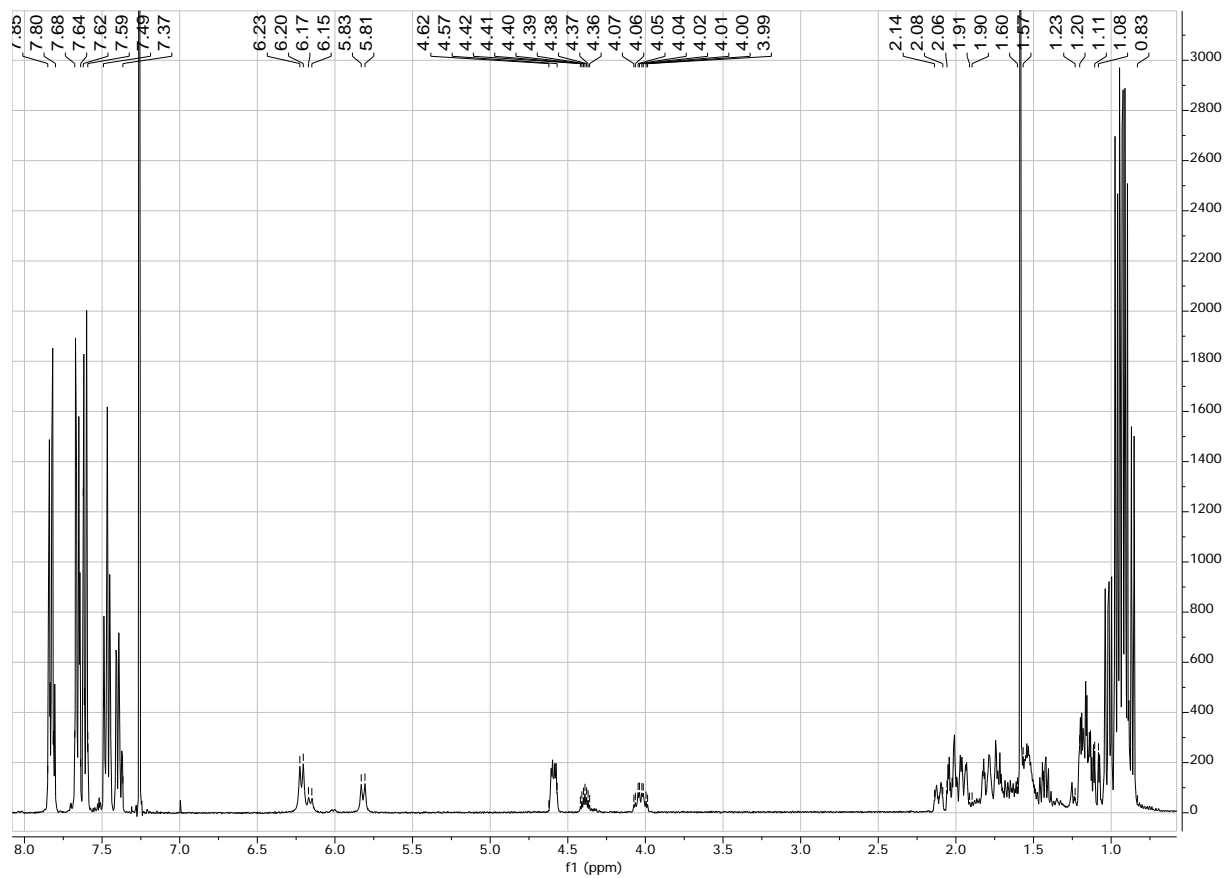

**Figure S13.**  $^1\text{H}$  NMR spectrum of N-(2-isopropyl-5-methylcyclohexyl)-[1,1'-biphenyl]-4-carboxamide (**2**, a mixture of three isomers present as a 30:21:49 ratio by LCMS).

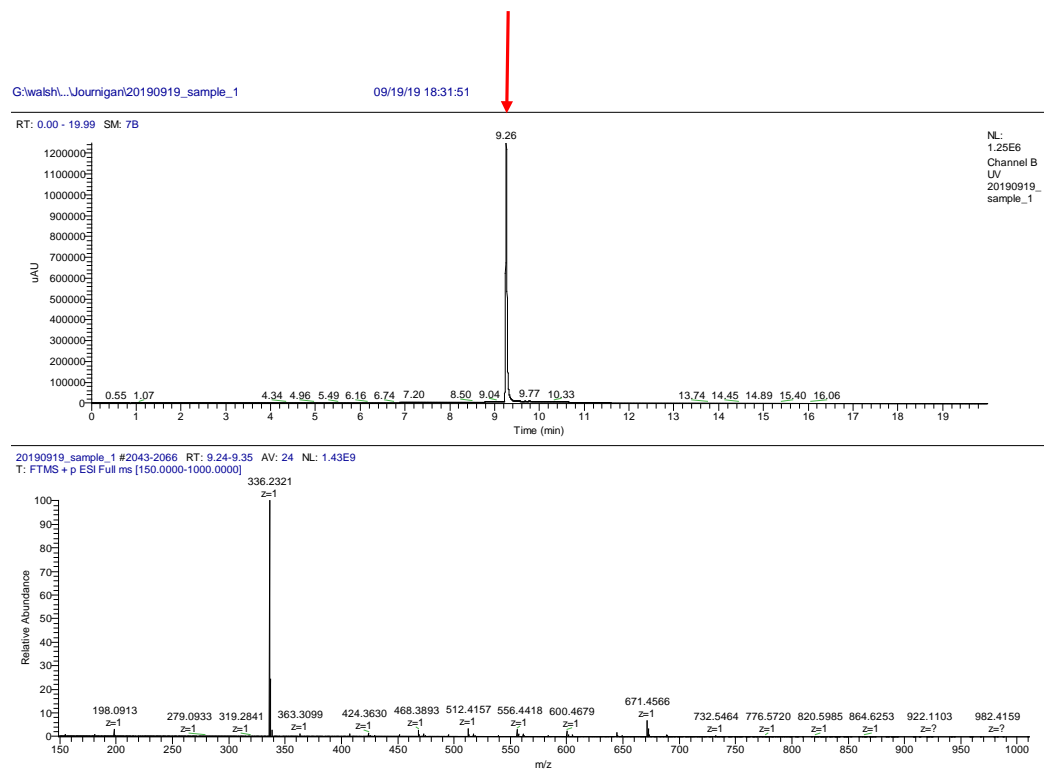

**Figure S14.** LCMS trace of N-(2-isopropyl-5-methylcyclohexyl)-[1,1'-biphenyl]-4-carboxamide (Isomer **2A**).

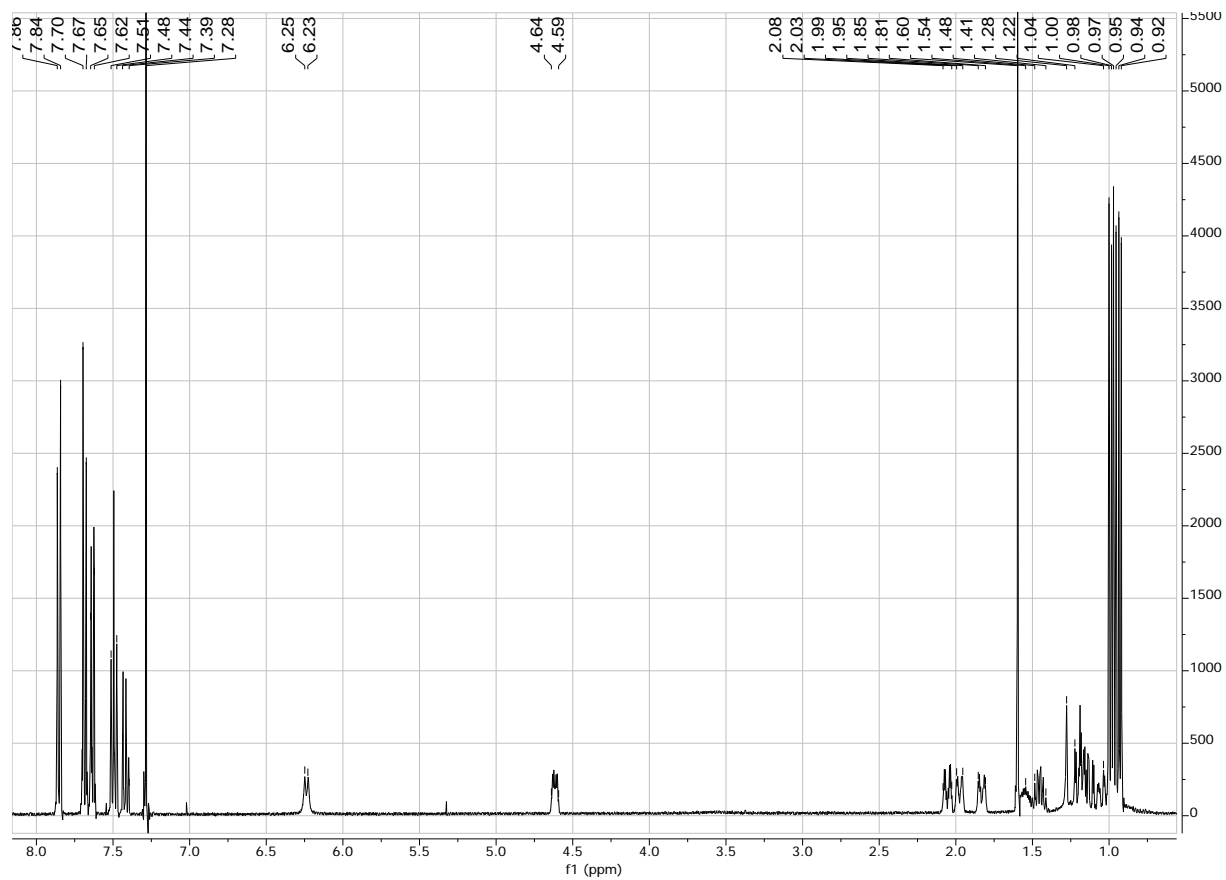

**Figure S15.**  $^1\text{H}$  NMR spectrum of N-(2-isopropyl-5-methylcyclohexyl)-[1,1'-biphenyl]-4-carboxamide (Isomer **2A**).

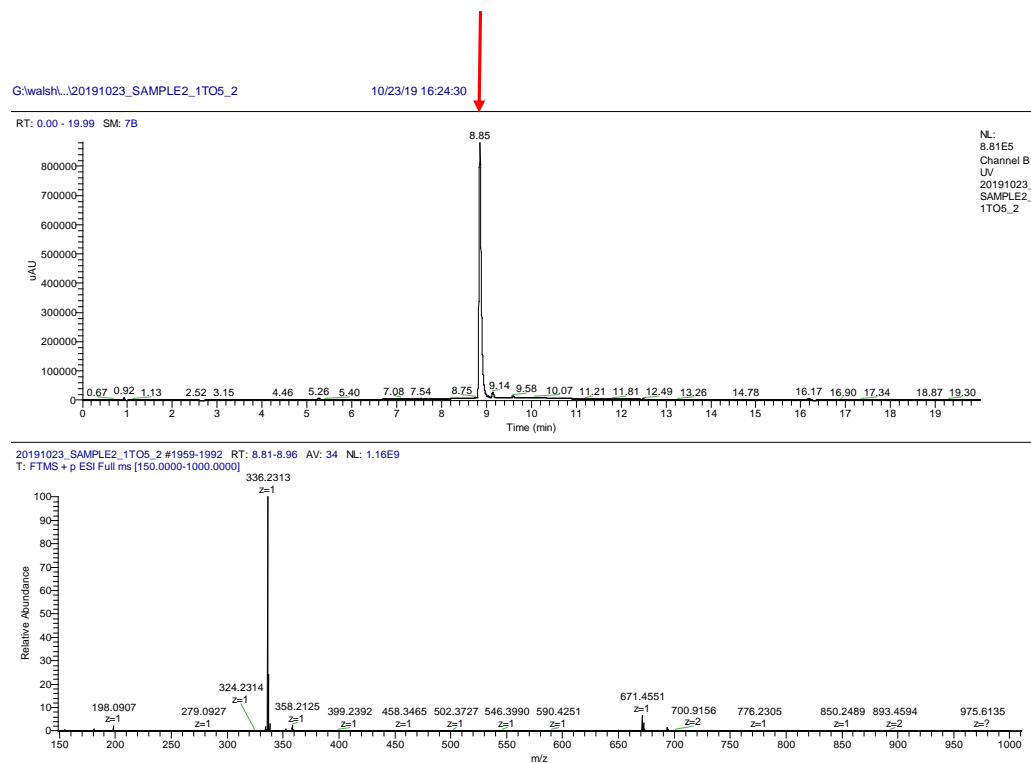

**Figure S16.** LCMS trace of N-(2-isopropyl-5-methylcyclohexyl)-[1,1'-biphenyl]-4-carboxamide (Isomer **2B**).

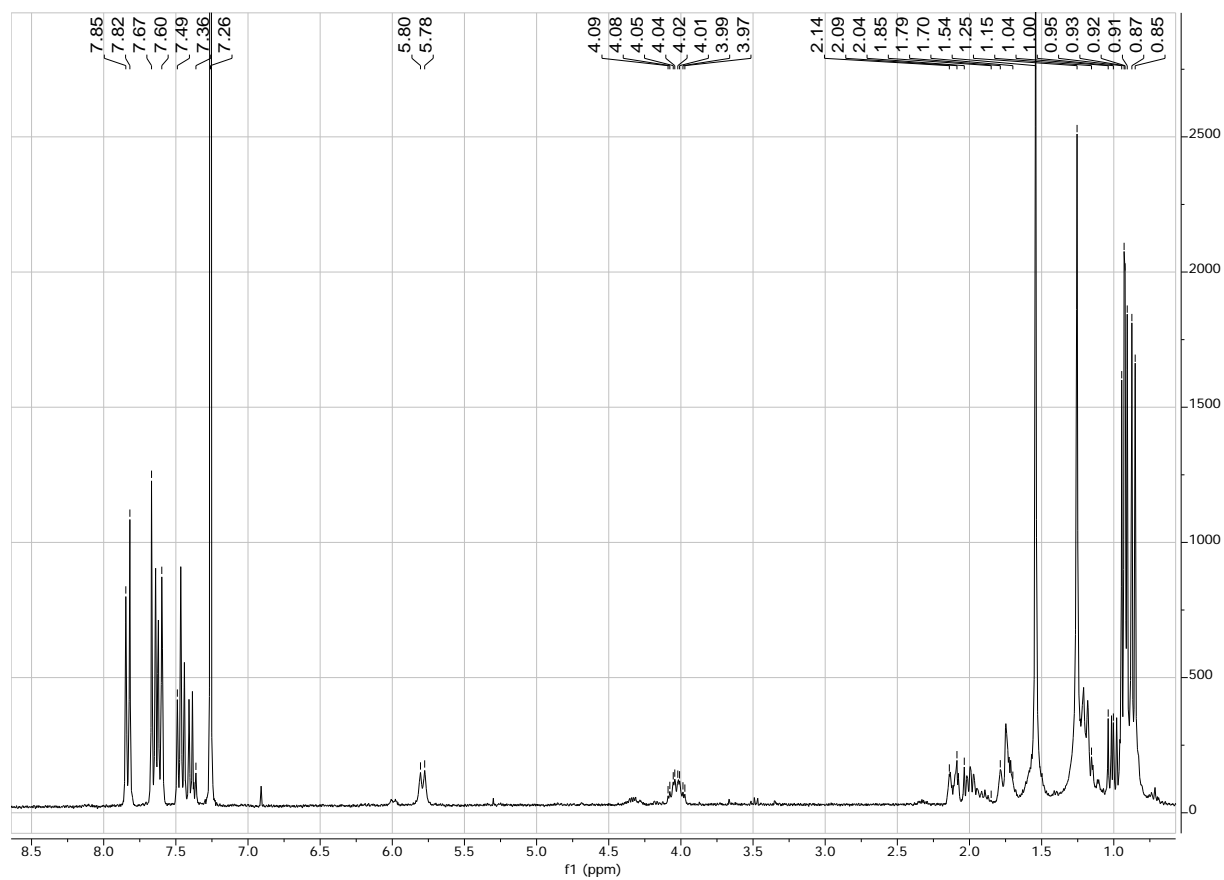

**Figure S17.** <sup>1</sup>H NMR spectrum of N-(2-isopropyl-5-methylcyclohexyl)-[1,1'-biphenyl]-4-carboxamide (Isomer **2B**).

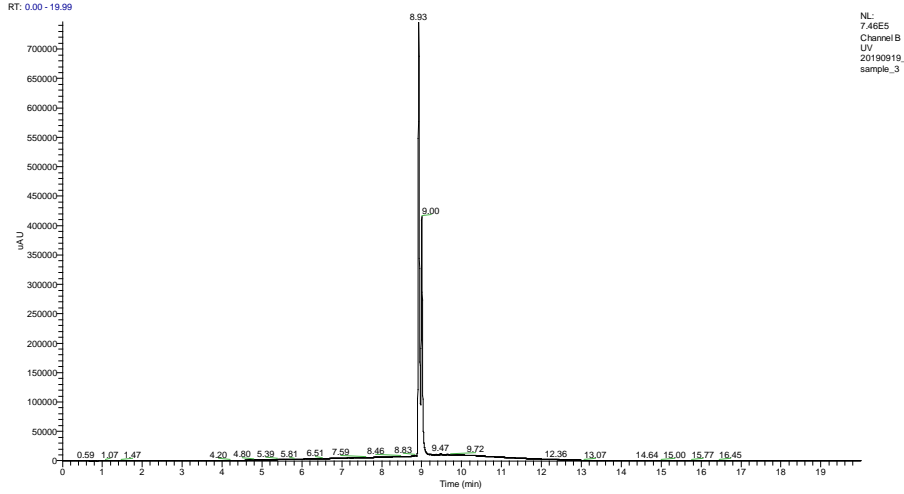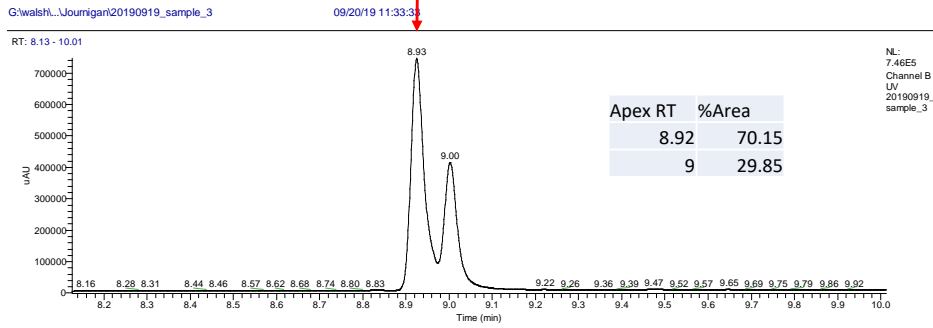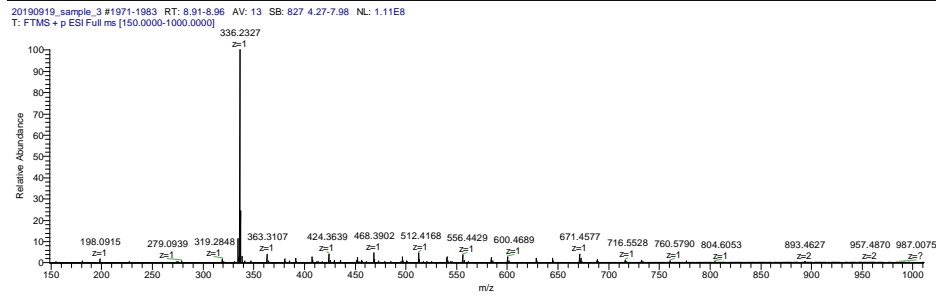



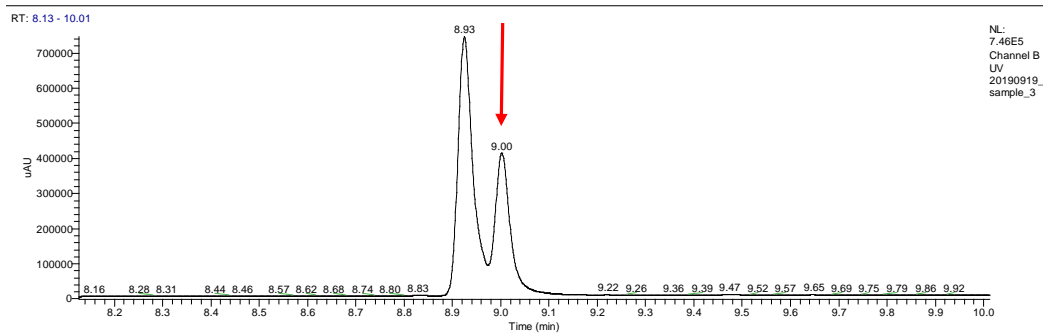

20190919\_sample\_3 #1988-1996 RT: 8.98-9.02 AV: 9 SB: 827 4.27-7.98 NL: 2.44E9  
T: FTMS + p ESI Full ms [150.0000-1000.0000]

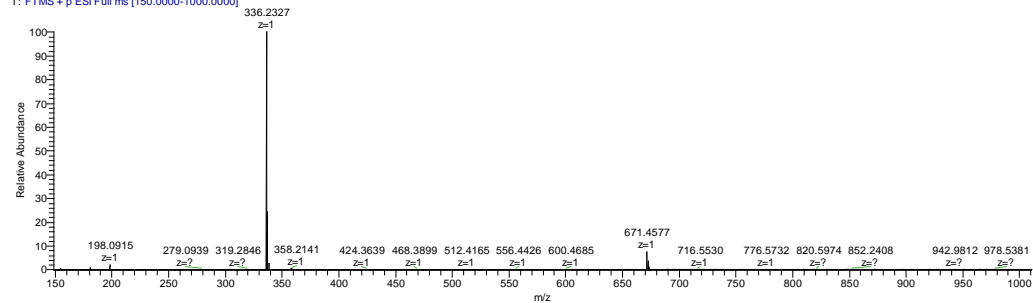

**Figure S18.** LCMS trace of N-(2-isopropyl-5-methylcyclohexyl)-[1,1'-biphenyl]-4-carboxamide (Isomer **2C**, obtained as a 70:30 ratio of **2B**:**2C**).

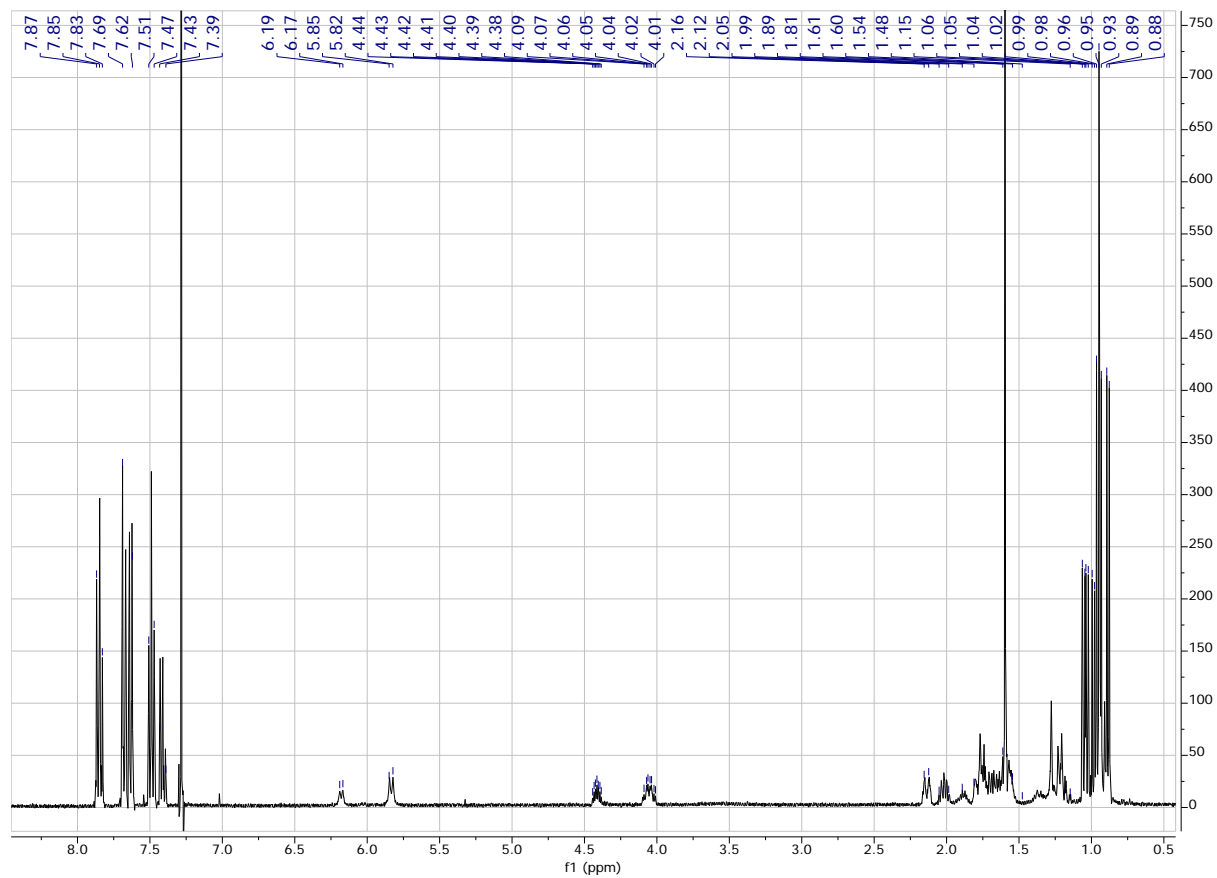

**Figure S19.**  $^1\text{H}$ NMR spectrum of N-(2-isopropyl-5-methylcyclohexyl)-[1,1'-biphenyl]-4-carboxamide (Isomer **2C**, obtained as a 70:30 ratio of 2B:2C).

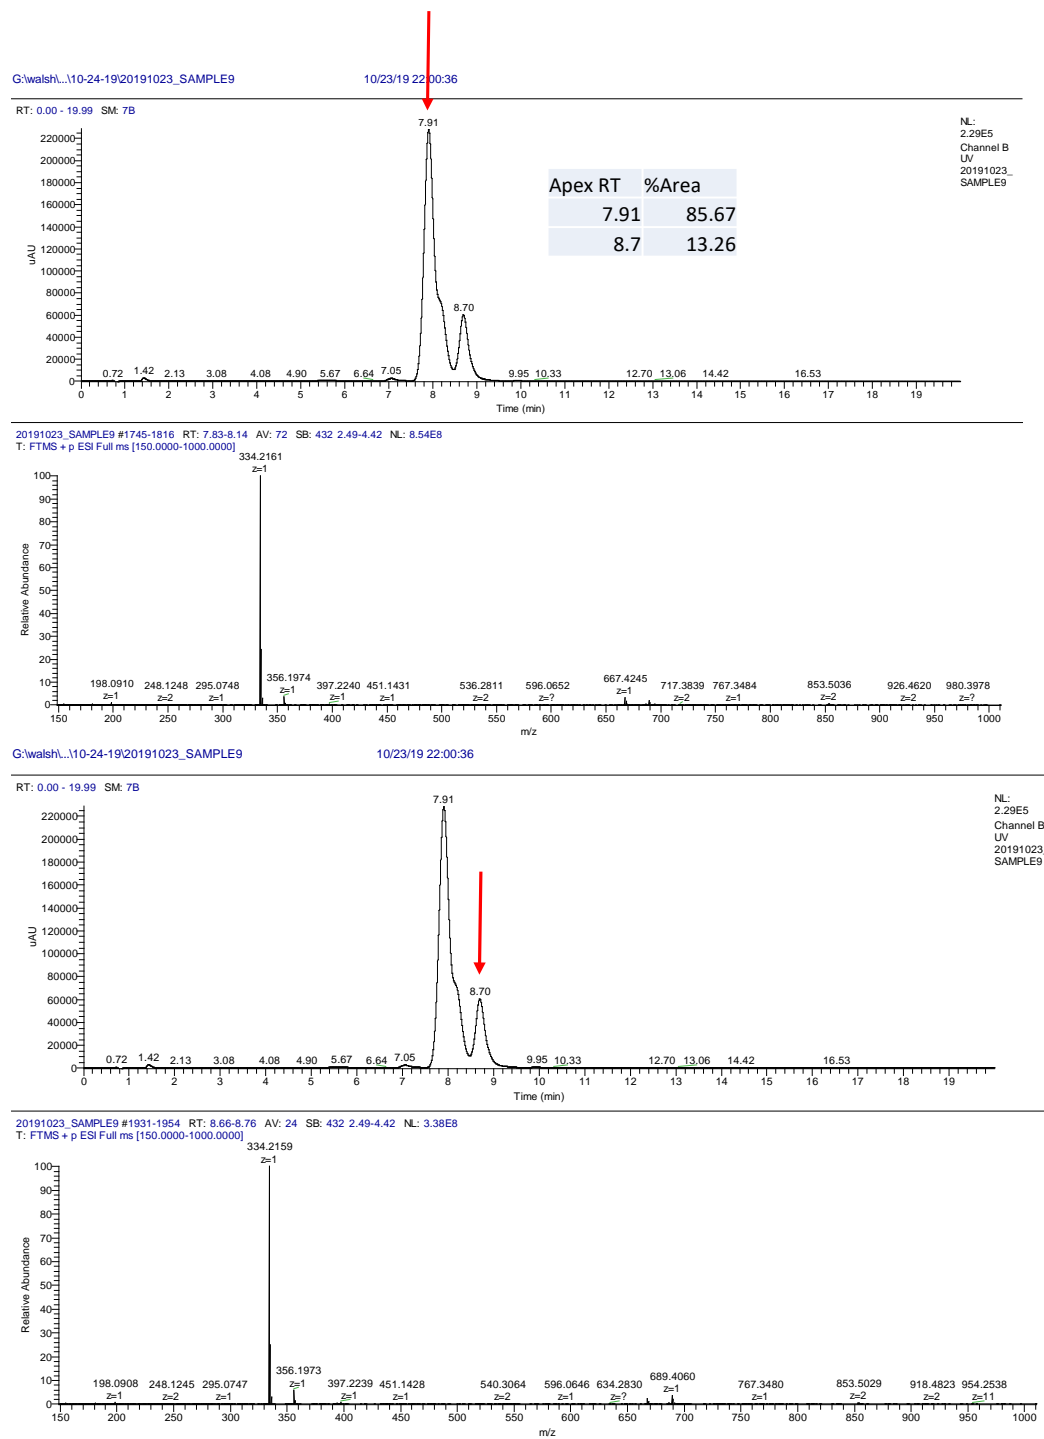

**Figure S20.** LCMS trace of N-(decahydronaphthalen-2-yl)-[1,1'-biphenyl]-4-carboxamide (**10**), a mixture of two isomers present as a 86:13 ratio by LCMS)

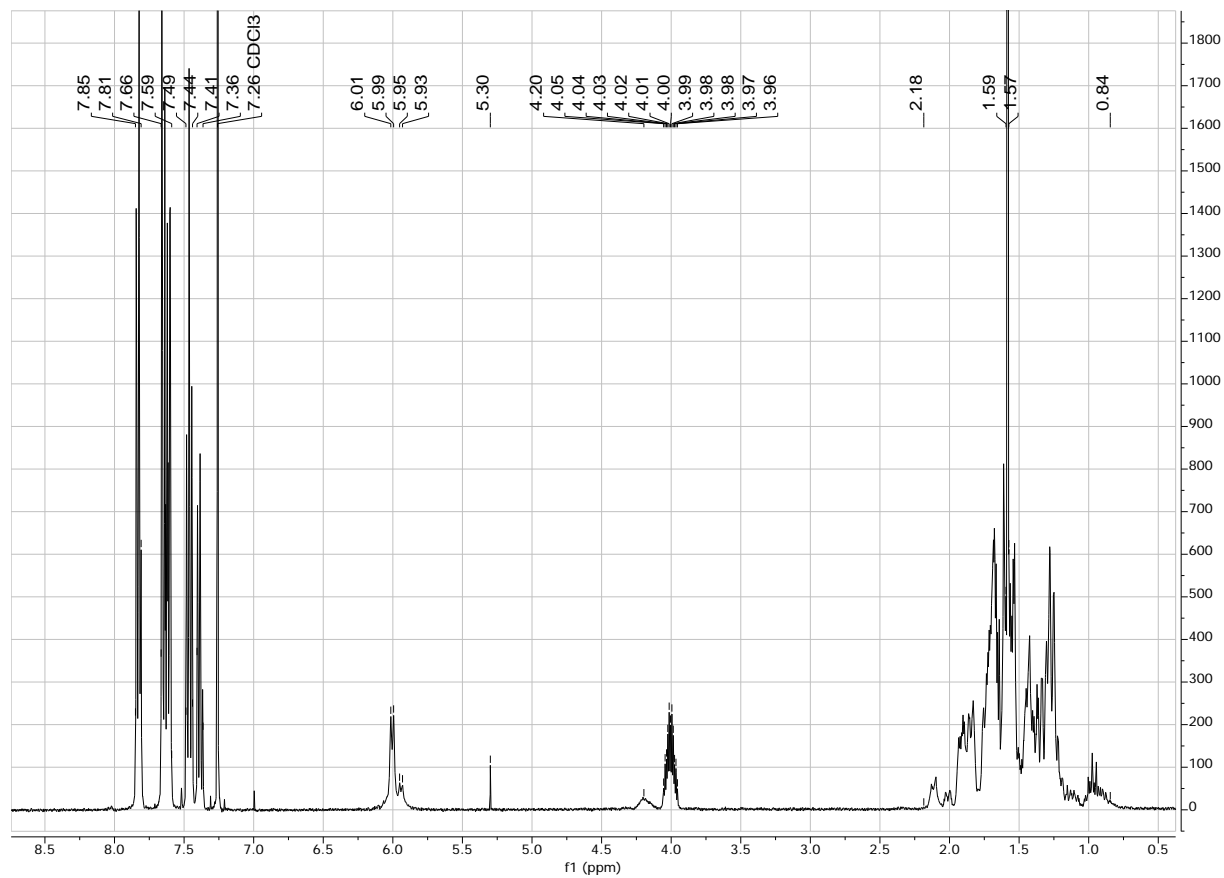

**Figure S21.** <sup>1</sup>H NMR spectrum of N-(decahydronaphthalen-2-yl)-[1,1'-biphenyl]-4-carboxamide (**10**, a mixture of two isomers present as a 86:13 ratio by LCMS).

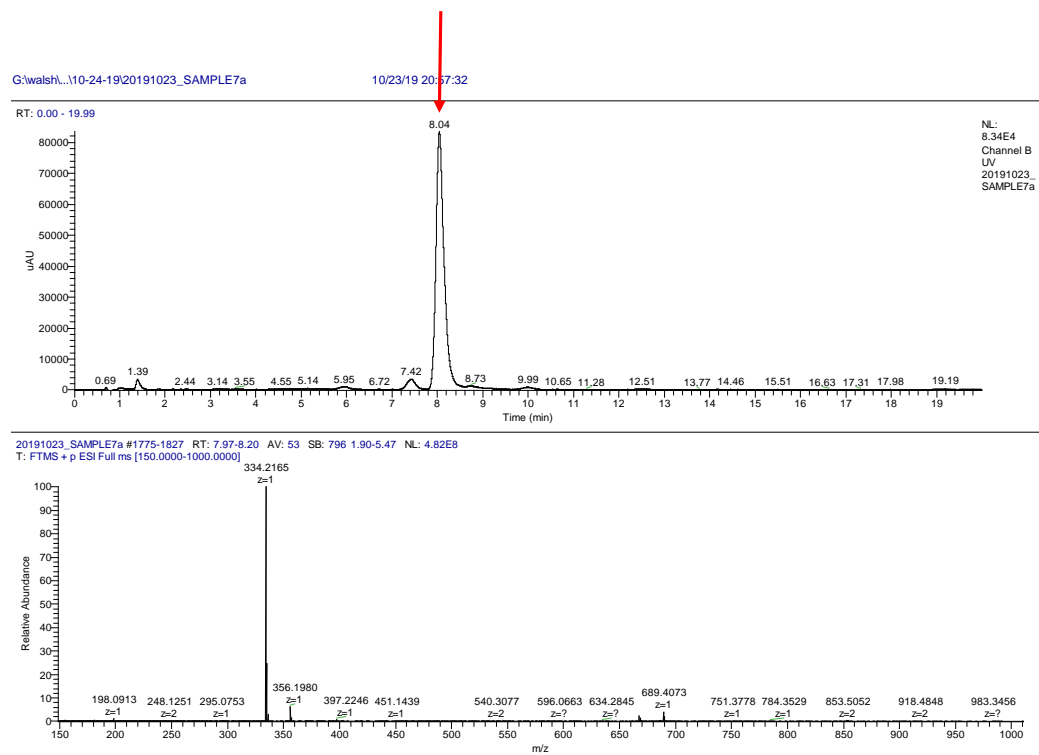

**Figure S22.** LCMS trace of N-((2SR,9RS,10SR)-decahydronaphthalen-2-yl)-[1,1'-biphenyl]-4-carboxamide (**12**, single isomer).

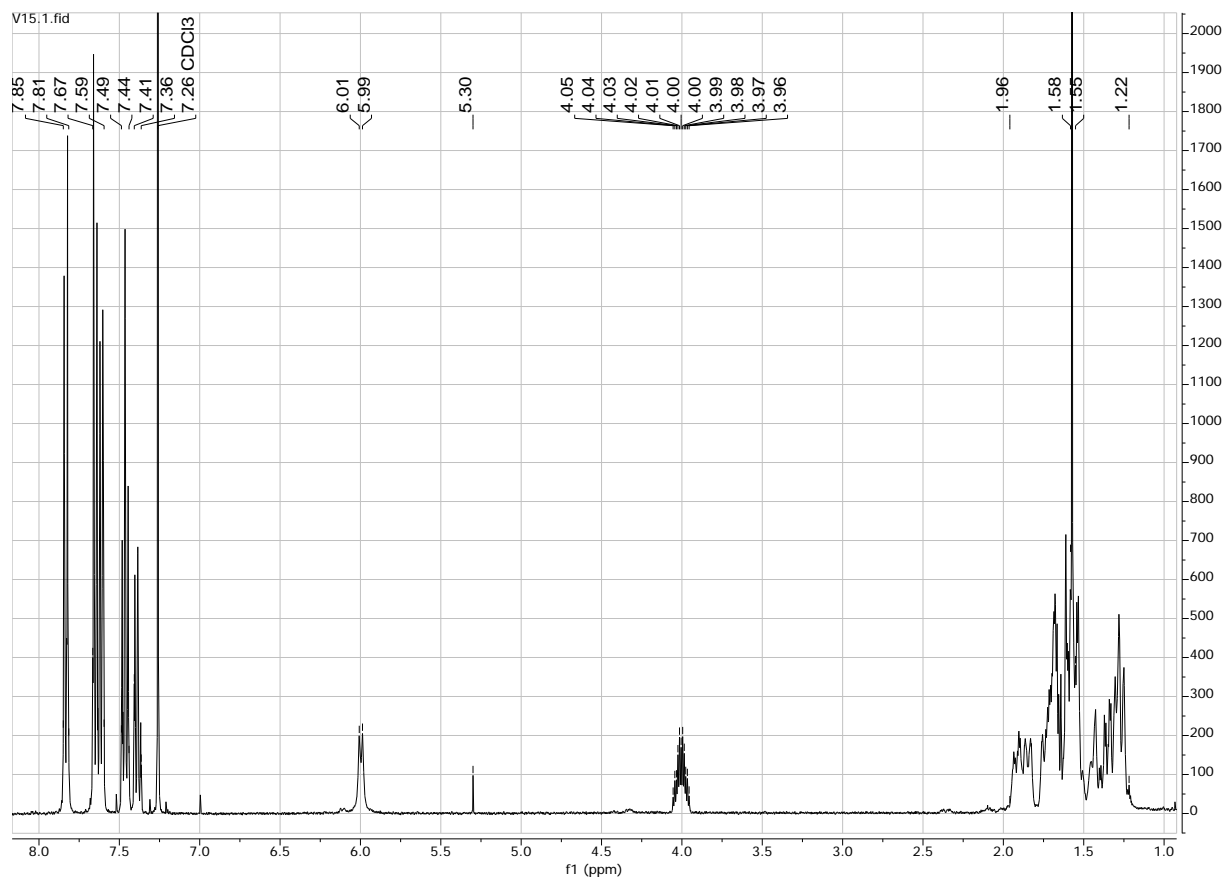

**Figure S23.** <sup>1</sup>H NMR spectrum of N-((2SR,9RS,10SR)-decahydronaphthalen-2-yl)-[1,1'-biphenyl]-4-carboxamide (**12**, single isomer).

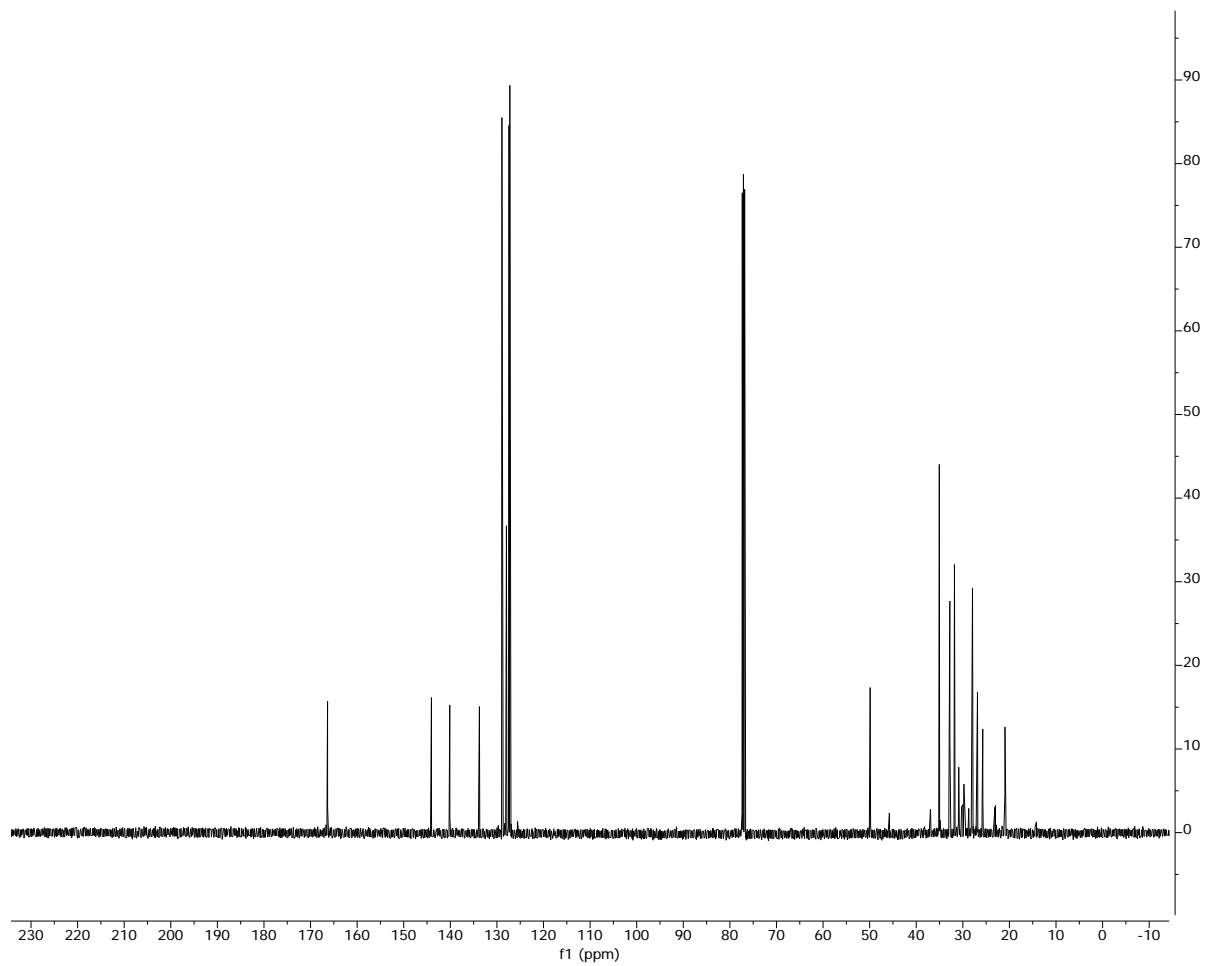

**Figure S24.**  $^{13}\text{C}$  NMR spectrum of N-((2SR,9RS,10SR)-decahydronaphthalen-2-yl)-[1,1'-biphenyl]-4-carboxamide (**12**, single isomer).

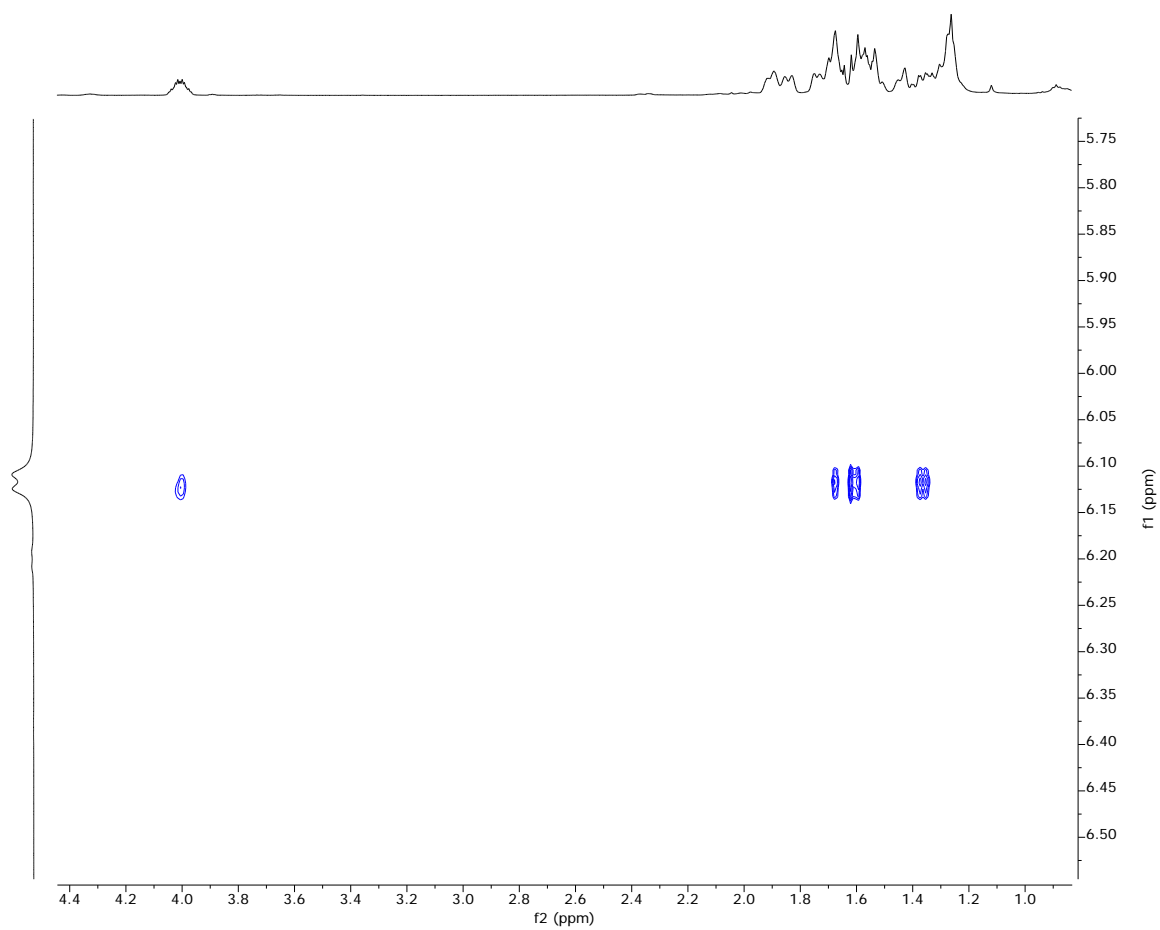

**Figure S25.** NOESY spectrum of N-((2SR,9RS,10SR)-decahydronaphthalen-2-yl)-[1,1'-biphenyl]-4-carboxamide (**12**, single isomer).



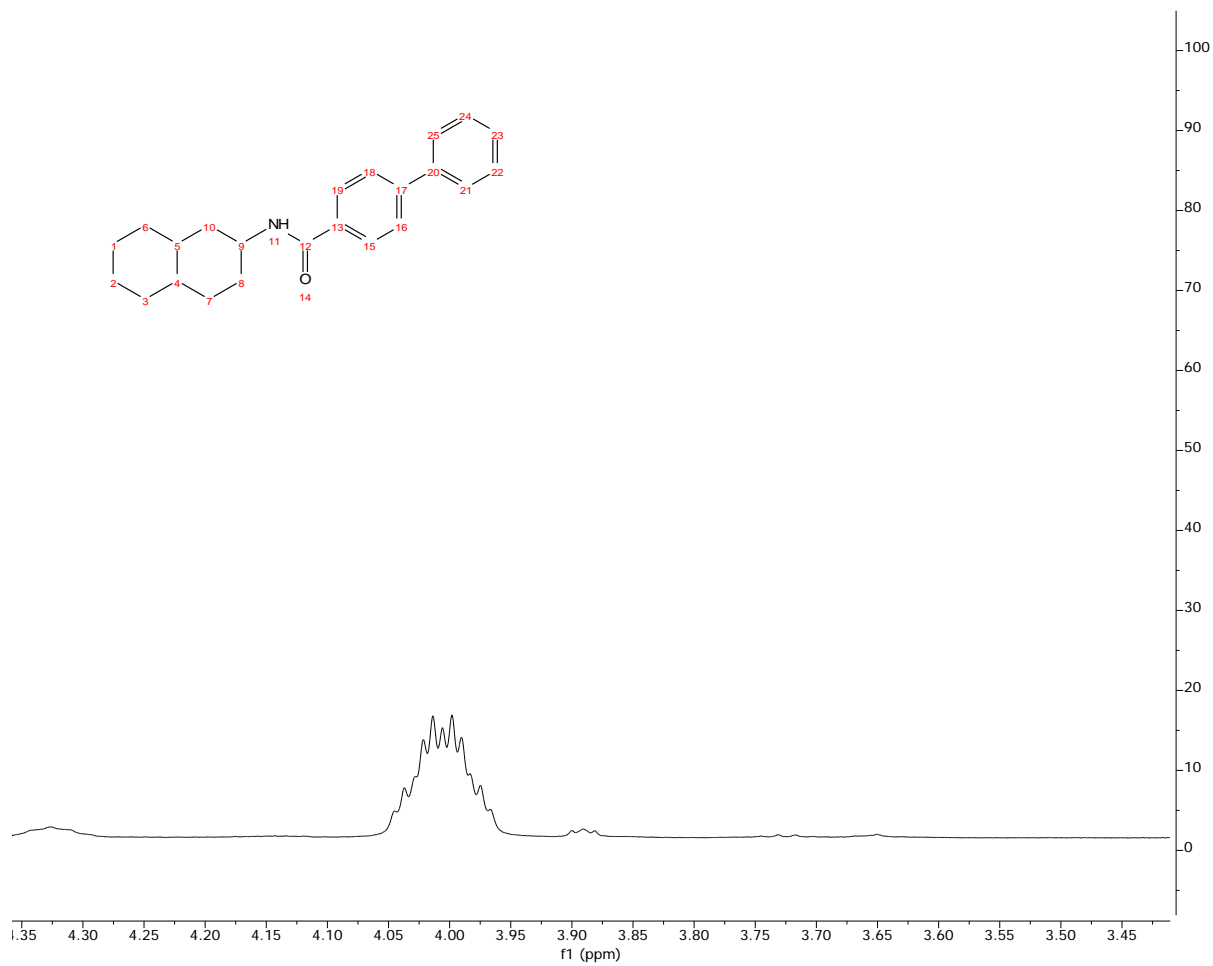

**Figure S26.** <sup>1</sup>H NMR spectrum of N-((2SR,9RS,10SR)-decahydronaphthalen-2-yl)-[1,1'-biphenyl]-4-carboxamide (**12**, single isomer).

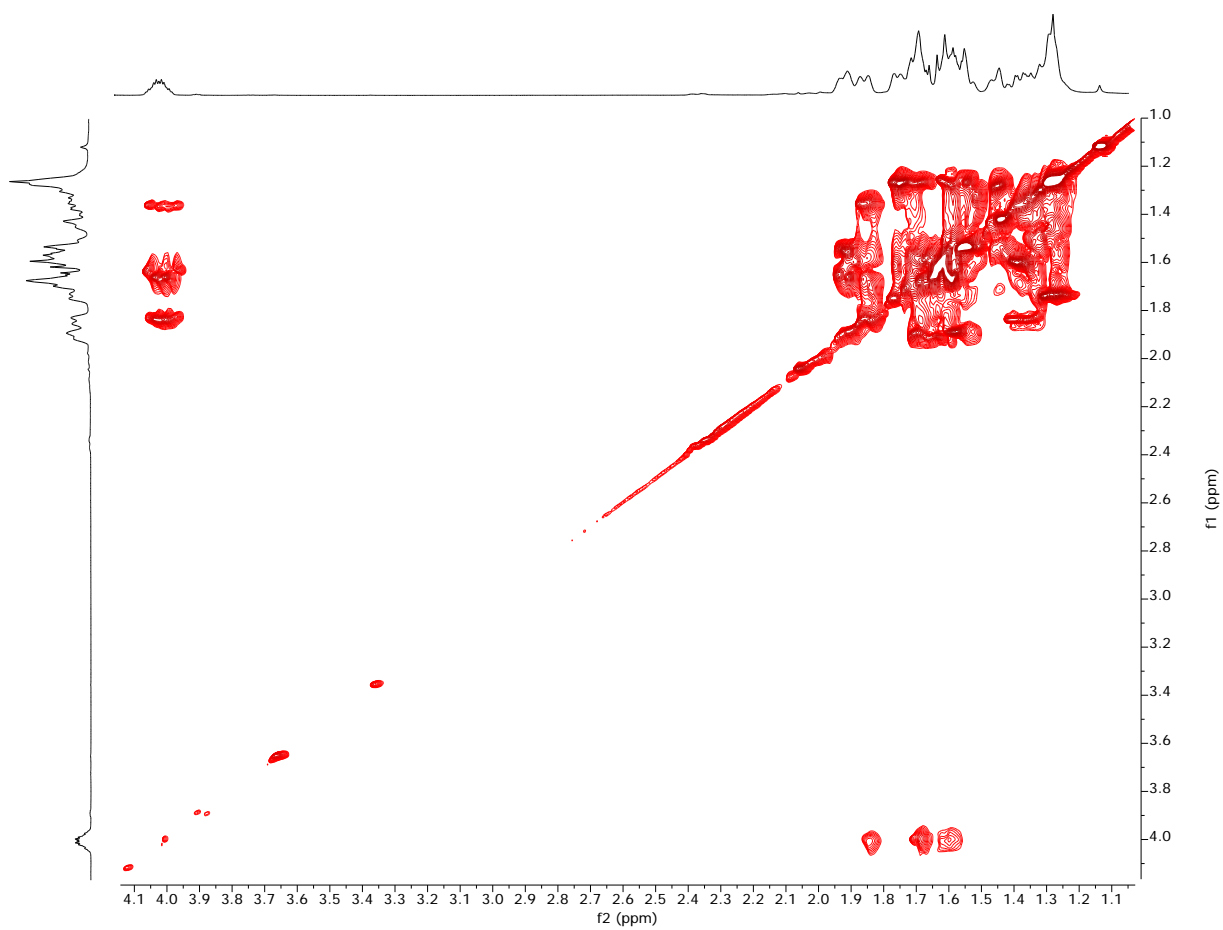

**Figure S27.** gCOSY spectrum of N-((2SR,9RS,10SR)-decahydronaphthalen-2-yl)-[1,1'-biphenyl]-4-carboxamide (**12**, single isomer).

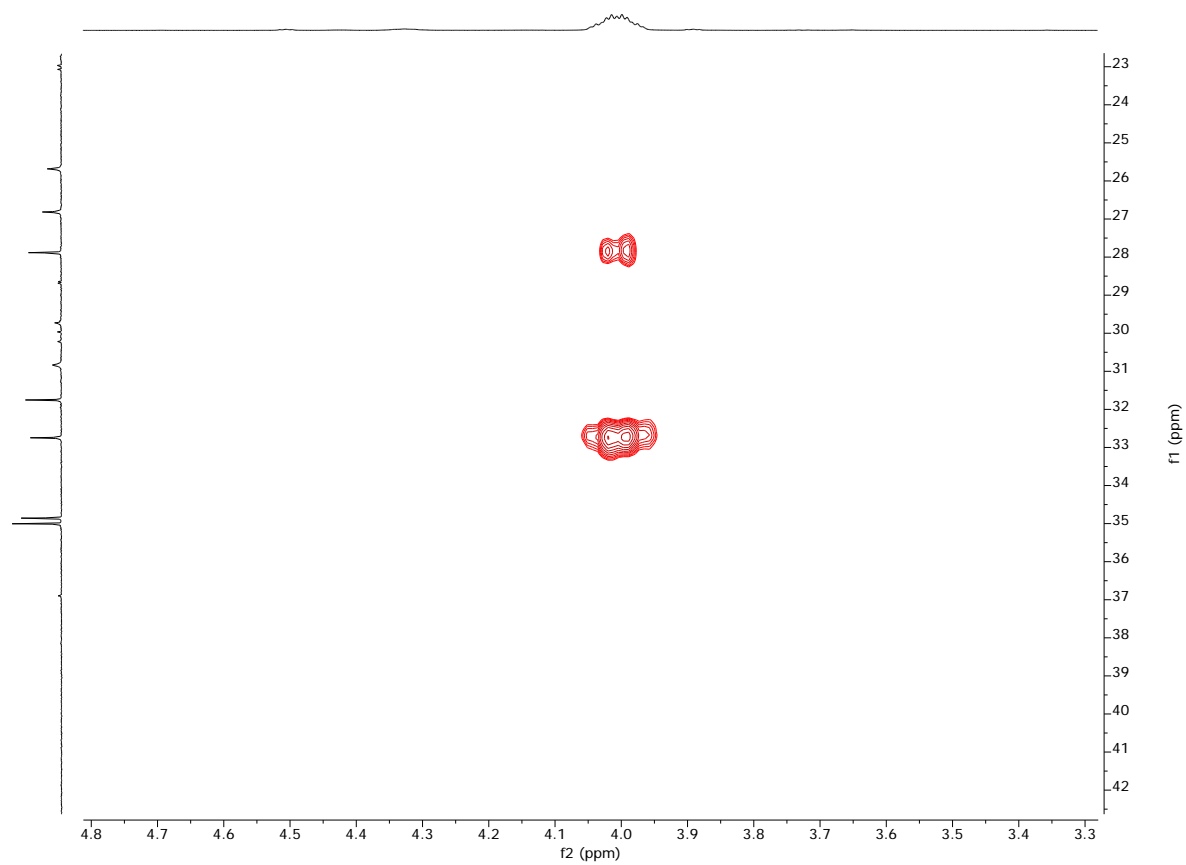

**Figure S28.** gH2BCAD spectrum of N-((2SR,9RS,10SR)-decahydronaphthalen-2-yl)-[1,1'-biphenyl]-4-carboxamide (**12**, single isomer).

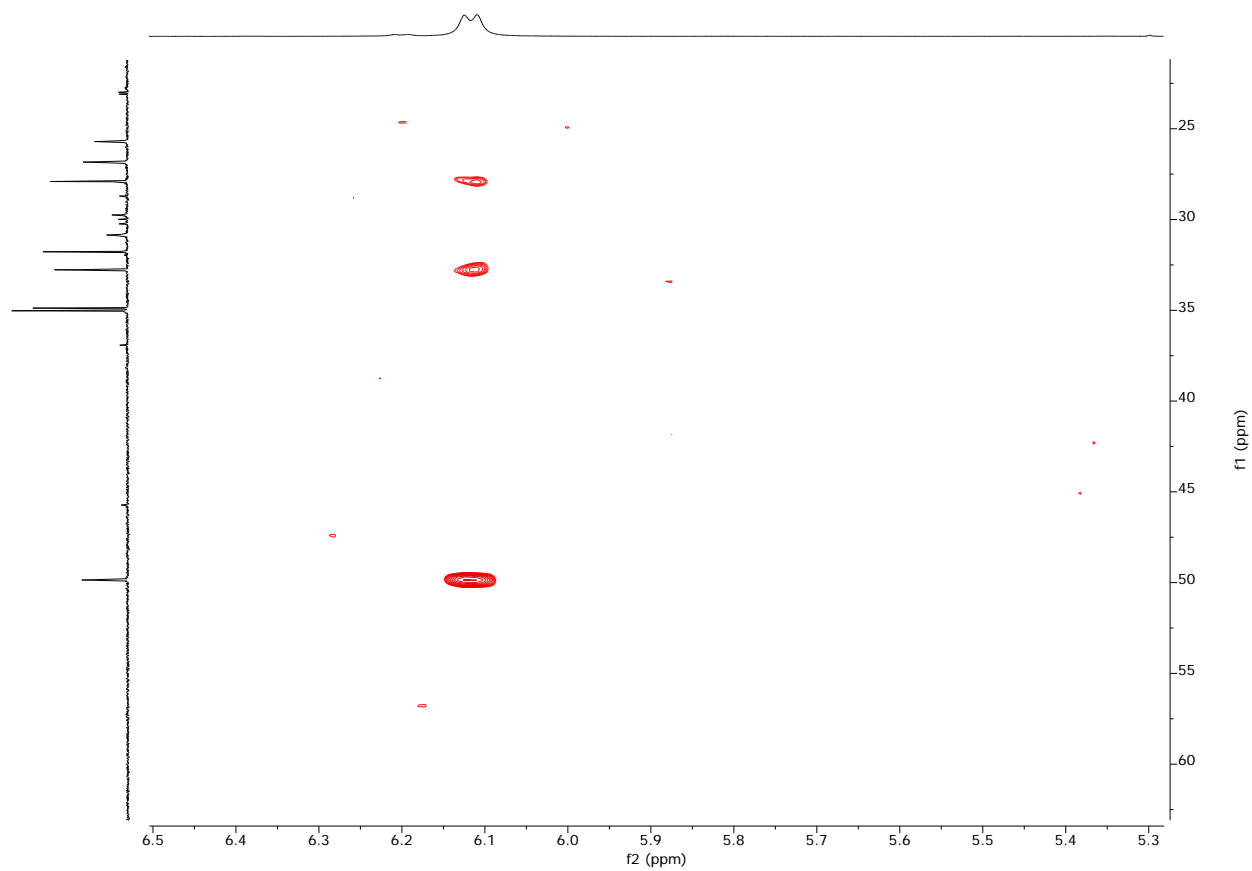

**Figure S29.** gHMBCAD spectrum of N-((2SR,9RS,10SR)-decahydronaphthalen-2-yl)-[1,1'-biphenyl]-4-carboxamide (**12**, single isomer).

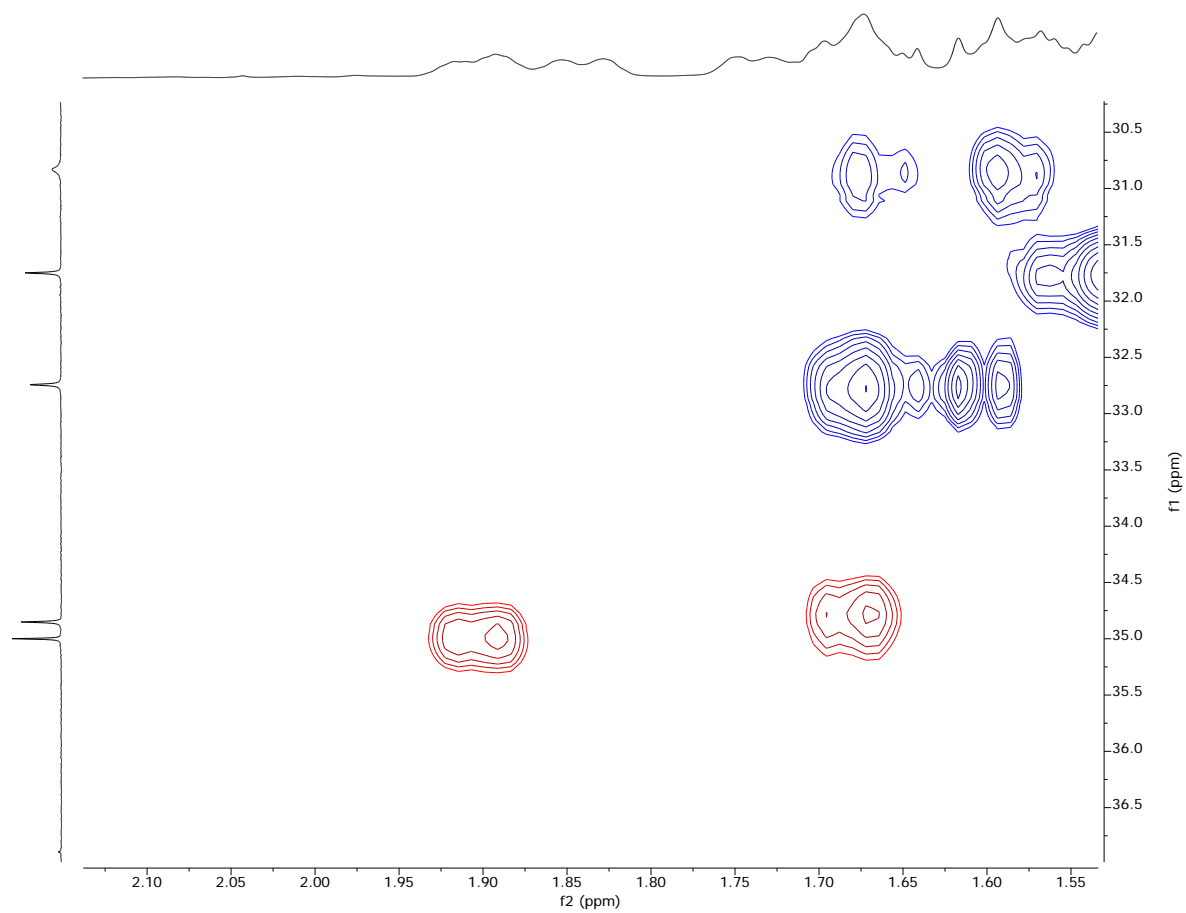

**Figure S30.** gHSQCAD spectrum of N-((2SR,9RS,10SR)-decahydronaphthalen-2-yl)-[1,1'-biphenyl]-4-carboxamide (**12**, single isomer).

**Table S6.** Assignment of  $^1\text{H}$ - and  $^{13}\text{C}$ -NMR chemical shifts of N-((2SR,9RS,10SR)-decahydronaphthalen-2-yl)-[1,1'-biphenyl]-4-carboxamide (**12**).

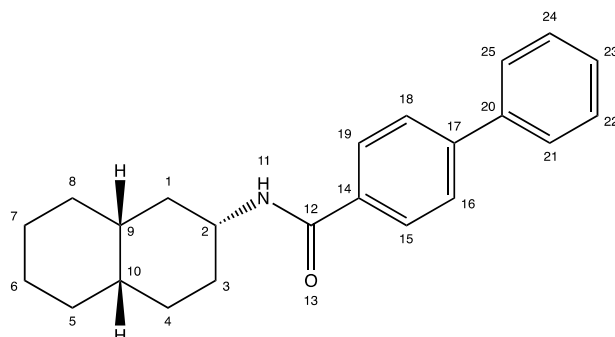

| Atom # | $^1\text{H}$ (ppm)                                    | $^{13}\text{C}$ (ppm) |
|--------|-------------------------------------------------------|-----------------------|
| 1      | H1: 1.68 (m, 1H), H1': 1.59 (m, 1H)                   | 32.72                 |
| 2      | 4.01 (tdt, $J=12,8.3,4.3$ Hz, 1H)                     | 49.9                  |
| 3      | H3: 1.84 (br d, $J = 12.9$ Hz, 1H), H3': 1.36 (m, 1H) | 27.9                  |
| 4      | H4: 1.58 (m, 1H), H4': 1.66 (m, 1H)                   | 30.85                 |
| 5      | H5: 1.57 (m, 1H), H5': 1.26 (m, 1H)                   | 25.72                 |
| 6      | H6: 1.74 (m, 1H), H6': 1.27 (m, 1H)                   | 26.82                 |
| 7      | H7: 1.30 (m, 1H), H7': 1.43 (m, 1H)                   | 20.93                 |
| 8      | H8, H8': 1.50-1.56 (m, 2H)                            | 31.74                 |
| 9      | H9: 1.91 (m, 1H)                                      | 35.0                  |
| 10     | 1.68 (m, 1H)                                          | 34.9                  |
| 11     | 6.12 (br d, $J=8.1$ Hz, 1H)                           | ---                   |
| 12     | ---                                                   | 166.3                 |
| 13     | ---                                                   | ---                   |
| 14     | ---                                                   | 133.7                 |
| 15,19  | H15,19: 7.85 (d, $J=8$ Hz, 2H)                        | 127.4                 |
| 16,18  | H16,18: 7.64 (t, $J=8.1$ Hz, 2H)                      | 127.16                |
| 17     | ---                                                   | 144.0                 |
| 20     | ---                                                   | 140.1                 |
| 21,25  | H21,25: 7.61 (d, $J=7.6$ Hz, 2H)                      | 127.2                 |
| 22,24  | H22,24: 7.46 (t, $J=7.5$ Hz, 2H)                      | 128.9                 |
| 23     | H23: 7.39 (t, $J=7.4$ Hz, 1H)                         | 127.9                 |

**Figure S31.** Coordinates for human TRPM8 computational model

```
REMARK Accelrys Discovery Studio PDB file
REMARK Created: 2019-03-26T14:02:54Z
ATOM 1 N GLN A 671 78.906 75.896 26.819 1.00 0.00 N1+
ATOM 2 CA GLN A 671 79.876 76.465 25.921 1.00 0.00 C
ATOM 3 C GLN A 671 80.820 77.365 26.659 1.00 0.00 C
ATOM 4 O GLN A 671 80.495 77.994 27.664 1.00 0.00 O
ATOM 5 CB GLN A 671 79.219 77.302 24.810 1.00 0.00 C
ATOM 6 CG GLN A 671 78.467 78.513 25.363 1.00 0.00 C
ATOM 7 CD GLN A 671 77.755 79.215 24.214 1.00 0.00 C
ATOM 8 NE2 GLN A 671 76.901 80.216 24.556 1.00 0.00 N
ATOM 9 OE1 GLN A 671 77.947 78.878 23.046 1.00 0.00 O
ATOM 10 N PRO A 672 82.029 77.379 26.155 1.00 0.00 N
ATOM 11 CA PRO A 672 83.070 78.186 26.730 1.00 0.00 C
ATOM 12 C PRO A 672 82.876 79.662 26.566 1.00 0.00 C
ATOM 13 O PRO A 672 83.460 80.413 27.346 1.00 0.00 O
ATOM 14 CB PRO A 672 84.373 77.676 26.121 1.00 0.00 C
ATOM 15 CG PRO A 672 84.073 76.203 25.804 1.00 0.00 C
ATOM 16 CD PRO A 672 82.560 76.176 25.533 1.00 0.00 C
ATOM 17 N GLY A 673 82.106 80.113 25.556 1.00 0.00 N
ATOM 18 CA GLY A 673 81.997 81.529 25.356 1.00 0.00 C
ATOM 19 C GLY A 673 81.326 82.174 26.529 1.00 0.00 C
ATOM 20 O GLY A 673 81.837 83.136 27.099 1.00 0.00 O
ATOM 21 N VAL A 674 80.164 81.636 26.935 1.00 0.00 N
ATOM 22 CA VAL A 674 79.428 82.197 28.023 1.00 0.00 C
ATOM 23 C VAL A 674 80.234 82.029 29.263 1.00 0.00 C
ATOM 24 O VAL A 674 80.257 82.908 30.122 1.00 0.00 O
ATOM 25 CB VAL A 674 78.105 81.521 28.236 1.00 0.00 C
ATOM 26 CG1 VAL A 674 78.357 80.033 28.526 1.00 0.00 C
ATOM 27 CG2 VAL A 674 77.356 82.254 29.366 1.00 0.00 C
ATOM 28 N GLN A 675 80.922 80.880 29.388 1.00 0.00 N
ATOM 29 CA GLN A 675 81.689 80.607 30.567 1.00 0.00 C
ATOM 30 C GLN A 675 82.775 81.631 30.678 1.00 0.00 C
ATOM 31 O GLN A 675 83.067 82.115 31.769 1.00 0.00 O
ATOM 32 CB GLN A 675 82.349 79.219 30.547 1.00 0.00 C
ATOM 33 CG GLN A 675 81.335 78.070 30.568 1.00 0.00 C
ATOM 34 CD GLN A 675 80.623 78.089 31.911 1.00 0.00 C
ATOM 35 NE2 GLN A 675 79.409 77.475 31.963 1.00 0.00 N
ATOM 36 OE1 GLN A 675 81.127 78.635 32.890 1.00 0.00 O
ATOM 37 N ASN A 676 83.394 81.994 29.541 1.00 0.00 N
```

|      |    |     |           |        |        |        |      |      |     |
|------|----|-----|-----------|--------|--------|--------|------|------|-----|
| ATOM | 38 | CA  | ASN A 676 | 84.449 | 82.966 | 29.555 | 1.00 | 0.00 | C   |
| ATOM | 39 | C   | ASN A 676 | 83.846 | 84.240 | 30.051 | 1.00 | 0.00 | C   |
| ATOM | 40 | O   | ASN A 676 | 84.474 | 85.000 | 30.785 | 1.00 | 0.00 | O   |
| ATOM | 41 | CB  | ASN A 676 | 85.037 | 83.226 | 28.158 | 1.00 | 0.00 | C   |
| ATOM | 42 | CG  | ASN A 676 | 86.273 | 84.103 | 28.318 | 1.00 | 0.00 | C   |
| ATOM | 43 | ND2 | ASN A 676 | 87.415 | 83.653 | 27.734 | 1.00 | 0.00 | N   |
| ATOM | 44 | OD1 | ASN A 676 | 86.223 | 85.156 | 28.950 | 1.00 | 0.00 | O   |
| ATOM | 45 | N   | PHE A 677 | 82.585 | 84.481 | 29.659 | 1.00 | 0.00 | N   |
| ATOM | 46 | CA  | PHE A 677 | 81.852 | 85.647 | 30.048 | 1.00 | 0.00 | C   |
| ATOM | 47 | C   | PHE A 677 | 81.733 | 85.643 | 31.538 | 1.00 | 0.00 | C   |
| ATOM | 48 | O   | PHE A 677 | 81.881 | 86.683 | 32.176 | 1.00 | 0.00 | O   |
| ATOM | 49 | CB  | PHE A 677 | 80.428 | 85.651 | 29.464 | 1.00 | 0.00 | C   |
| ATOM | 50 | CG  | PHE A 677 | 79.711 | 86.873 | 29.926 | 1.00 | 0.00 | C   |
| ATOM | 51 | CD1 | PHE A 677 | 79.852 | 88.068 | 29.259 | 1.00 | 0.00 | C   |
| ATOM | 52 | CD2 | PHE A 677 | 78.890 | 86.817 | 31.028 | 1.00 | 0.00 | C   |
| ATOM | 53 | CE1 | PHE A 677 | 79.185 | 89.191 | 29.691 | 1.00 | 0.00 | C   |
| ATOM | 54 | CE2 | PHE A 677 | 78.222 | 87.935 | 31.465 | 1.00 | 0.00 | C   |
| ATOM | 55 | CZ  | PHE A 677 | 78.370 | 89.126 | 30.796 | 1.00 | 0.00 | C   |
| ATOM | 56 | N   | LEU A 678 | 81.470 | 84.464 | 32.141 | 1.00 | 0.00 | N   |
| ATOM | 57 | CA  | LEU A 678 | 81.325 | 84.431 | 33.571 | 1.00 | 0.00 | C   |
| ATOM | 58 | C   | LEU A 678 | 82.590 | 84.932 | 34.173 | 1.00 | 0.00 | C   |
| ATOM | 59 | O   | LEU A 678 | 82.579 | 85.770 | 35.074 | 1.00 | 0.00 | O   |
| ATOM | 60 | CB  | LEU A 678 | 81.233 | 83.029 | 34.197 | 1.00 | 0.00 | C   |
| ATOM | 61 | CG  | LEU A 678 | 79.940 | 82.222 | 34.015 | 1.00 | 0.00 | C   |
| ATOM | 62 | CD1 | LEU A 678 | 79.711 | 81.796 | 32.562 | 1.00 | 0.00 | C   |
| ATOM | 63 | CD2 | LEU A 678 | 79.948 | 81.036 | 34.996 | 1.00 | 0.00 | C   |
| ATOM | 64 | N   | SER A 679 | 83.719 | 84.417 | 33.665 | 1.00 | 0.00 | N   |
| ATOM | 65 | CA  | SER A 679 | 85.007 | 84.723 | 34.210 | 1.00 | 0.00 | C   |
| ATOM | 66 | C   | SER A 679 | 85.255 | 86.192 | 34.095 | 1.00 | 0.00 | C   |
| ATOM | 67 | O   | SER A 679 | 85.779 | 86.813 | 35.021 | 1.00 | 0.00 | O   |
| ATOM | 68 | CB  | SER A 679 | 86.139 | 84.006 | 33.456 | 1.00 | 0.00 | C   |
| ATOM | 69 | OG  | SER A 679 | 87.395 | 84.344 | 34.022 | 1.00 | 0.00 | O   |
| ATOM | 70 | N   | LYS A 680 | 84.877 | 86.795 | 32.957 | 1.00 | 0.00 | N   |
| ATOM | 71 | CA  | LYS A 680 | 85.133 | 88.191 | 32.778 | 1.00 | 0.00 | C   |
| ATOM | 72 | C   | LYS A 680 | 84.371 | 88.936 | 33.821 | 1.00 | 0.00 | C   |
| ATOM | 73 | O   | LYS A 680 | 84.888 | 89.875 | 34.424 | 1.00 | 0.00 | O   |
| ATOM | 74 | CB  | LYS A 680 | 84.686 | 88.692 | 31.391 | 1.00 | 0.00 | C   |
| ATOM | 75 | CG  | LYS A 680 | 84.999 | 90.164 | 31.084 | 1.00 | 0.00 | C   |
| ATOM | 76 | CD  | LYS A 680 | 84.227 | 91.186 | 31.925 | 1.00 | 0.00 | C   |
| ATOM | 77 | CE  | LYS A 680 | 84.524 | 92.643 | 31.556 | 1.00 | 0.00 | C   |
| ATOM | 78 | NZ  | LYS A 680 | 83.699 | 93.553 | 32.378 | 1.00 | 0.00 | N1+ |
| ATOM | 79 | N   | GLN A 681 | 83.111 | 88.532 | 34.058 | 1.00 | 0.00 | N   |
| ATOM | 80 | CA  | GLN A 681 | 82.280 | 89.205 | 35.012 | 1.00 | 0.00 | C   |
| ATOM | 81 | C   | GLN A 681 | 82.831 | 89.009 | 36.394 | 1.00 | 0.00 | C   |



|      |     |     |           |        |        |        |      |      |   |
|------|-----|-----|-----------|--------|--------|--------|------|------|---|
| ATOM | 82  | O   | GLN A 681 | 82.828 | 89.932 | 37.203 | 1.00 | 0.00 | O |
| ATOM | 83  | CB  | GLN A 681 | 80.829 | 88.690 | 34.987 | 1.00 | 0.00 | C |
| ATOM | 84  | CG  | GLN A 681 | 79.909 | 89.385 | 35.993 | 1.00 | 0.00 | C |
| ATOM | 85  | CD  | GLN A 681 | 78.486 | 88.915 | 35.721 | 1.00 | 0.00 | C |
| ATOM | 86  | NE2 | GLN A 681 | 77.958 | 88.018 | 36.594 | 1.00 | 0.00 | N |
| ATOM | 87  | OE1 | GLN A 681 | 77.860 | 89.336 | 34.751 | 1.00 | 0.00 | O |
| ATOM | 88  | N   | TRP A 682 | 83.321 | 87.792 | 36.682 | 1.00 | 0.00 | N |
| ATOM | 89  | CA  | TRP A 682 | 83.808 | 87.426 | 37.983 | 1.00 | 0.00 | C |
| ATOM | 90  | C   | TRP A 682 | 84.976 | 88.287 | 38.363 | 1.00 | 0.00 | C |
| ATOM | 91  | O   | TRP A 682 | 85.008 | 88.863 | 39.449 | 1.00 | 0.00 | O |
| ATOM | 92  | CB  | TRP A 682 | 84.293 | 85.967 | 38.000 | 1.00 | 0.00 | C |
| ATOM | 93  | CG  | TRP A 682 | 84.810 | 85.473 | 39.329 | 1.00 | 0.00 | C |
| ATOM | 94  | CD1 | TRP A 682 | 86.073 | 85.533 | 39.842 | 1.00 | 0.00 | C |
| ATOM | 95  | CD2 | TRP A 682 | 84.007 | 84.785 | 40.298 | 1.00 | 0.00 | C |
| ATOM | 96  | CE2 | TRP A 682 | 84.840 | 84.465 | 41.369 | 1.00 | 0.00 | C |
| ATOM | 97  | CE3 | TRP A 682 | 82.686 | 84.444 | 40.297 | 1.00 | 0.00 | C |
| ATOM | 98  | NE1 | TRP A 682 | 86.107 | 84.931 | 41.078 | 1.00 | 0.00 | N |
| ATOM | 99  | CZ2 | TRP A 682 | 84.363 | 83.794 | 42.461 | 1.00 | 0.00 | C |
| ATOM | 100 | CZ3 | TRP A 682 | 82.206 | 83.771 | 41.398 | 1.00 | 0.00 | C |
| ATOM | 101 | CH2 | TRP A 682 | 83.030 | 83.452 | 42.461 | 1.00 | 0.00 | C |
| ATOM | 102 | N   | TYR A 683 | 85.974 | 88.394 | 37.465 | 1.00 | 0.00 | N |
| ATOM | 103 | CA  | TYR A 683 | 87.168 | 89.158 | 37.709 | 1.00 | 0.00 | C |
| ATOM | 104 | C   | TYR A 683 | 86.829 | 90.604 | 37.810 | 1.00 | 0.00 | C |
| ATOM | 105 | O   | TYR A 683 | 87.462 | 91.342 | 38.566 | 1.00 | 0.00 | O |
| ATOM | 106 | CB  | TYR A 683 | 88.238 | 89.027 | 36.612 | 1.00 | 0.00 | C |
| ATOM | 107 | CG  | TYR A 683 | 88.849 | 87.674 | 36.704 | 1.00 | 0.00 | C |
| ATOM | 108 | CD1 | TYR A 683 | 89.680 | 87.358 | 37.754 | 1.00 | 0.00 | C |
| ATOM | 109 | CD2 | TYR A 683 | 88.616 | 86.731 | 35.731 | 1.00 | 0.00 | C |
| ATOM | 110 | CE1 | TYR A 683 | 90.257 | 86.115 | 37.842 | 1.00 | 0.00 | C |
| ATOM | 111 | CE2 | TYR A 683 | 89.191 | 85.486 | 35.815 | 1.00 | 0.00 | C |
| ATOM | 112 | CZ  | TYR A 683 | 90.011 | 85.176 | 36.871 | 1.00 | 0.00 | C |
| ATOM | 113 | OH  | TYR A 683 | 90.601 | 83.896 | 36.951 | 1.00 | 0.00 | O |
| ATOM | 114 | N   | GLY A 684 | 85.850 | 91.065 | 37.013 | 1.00 | 0.00 | N |
| ATOM | 115 | CA  | GLY A 684 | 85.518 | 92.454 | 37.057 | 1.00 | 0.00 | C |
| ATOM | 116 | C   | GLY A 684 | 86.520 | 93.174 | 36.220 | 1.00 | 0.00 | C |
| ATOM | 117 | O   | GLY A 684 | 86.970 | 92.666 | 35.193 | 1.00 | 0.00 | O |
| ATOM | 118 | N   | GLU A 685 | 86.881 | 94.392 | 36.656 | 1.00 | 0.00 | N |
| ATOM | 119 | CA  | GLU A 685 | 87.806 | 95.251 | 35.989 | 1.00 | 0.00 | C |
| ATOM | 120 | C   | GLU A 685 | 89.137 | 94.580 | 35.936 | 1.00 | 0.00 | C |
| ATOM | 121 | O   | GLU A 685 | 89.858 | 94.701 | 34.948 | 1.00 | 0.00 | O |
| ATOM | 122 | CB  | GLU A 685 | 87.992 | 96.571 | 36.759 | 1.00 | 0.00 | C |
| ATOM | 123 | CG  | GLU A 685 | 89.227 | 97.383 | 36.366 | 1.00 | 0.00 | C |
| ATOM | 124 | CD  | GLU A 685 | 88.952 | 98.171 | 35.098 | 1.00 | 0.00 | C |
| ATOM | 125 | OE1 | GLU A 685 | 87.785 | 98.612 | 34.904 | 1.00 | 0.00 | O |

|      |     |     |     |   |     |        |        |        |      |      |   |
|------|-----|-----|-----|---|-----|--------|--------|--------|------|------|---|
| ATOM | 126 | OE2 | GLU | A | 685 | 89.915 | 98.347 | 34.309 | 1.00 | 0.00 | O |
| ATOM | 127 | N   | ILE | A | 686 | 89.506 | 93.858 | 37.008 | 1.00 | 0.00 | N |
| ATOM | 128 | CA  | ILE | A | 686 | 90.800 | 93.248 | 37.037 | 1.00 | 0.00 | C |
| ATOM | 129 | C   | ILE | A | 686 | 90.865 | 92.219 | 35.960 | 1.00 | 0.00 | C |
| ATOM | 130 | O   | ILE | A | 686 | 89.955 | 91.412 | 35.784 | 1.00 | 0.00 | O |
| ATOM | 131 | CB  | ILE | A | 686 | 91.130 | 92.596 | 38.351 | 1.00 | 0.00 | C |
| ATOM | 132 | CG1 | ILE | A | 686 | 91.126 | 93.637 | 39.487 | 1.00 | 0.00 | C |
| ATOM | 133 | CG2 | ILE | A | 686 | 92.485 | 91.893 | 38.194 | 1.00 | 0.00 | C |
| ATOM | 134 | CD1 | ILE | A | 686 | 89.740 | 94.204 | 39.802 | 1.00 | 0.00 | C |
| ATOM | 135 | N   | SER | A | 687 | 91.967 | 92.253 | 35.185 | 1.00 | 0.00 | N |
| ATOM | 136 | CA  | SER | A | 687 | 92.153 | 91.342 | 34.098 | 1.00 | 0.00 | C |
| ATOM | 137 | C   | SER | A | 687 | 92.532 | 90.013 | 34.662 | 1.00 | 0.00 | C |
| ATOM | 138 | O   | SER | A | 687 | 92.990 | 89.902 | 35.799 | 1.00 | 0.00 | O |
| ATOM | 139 | CB  | SER | A | 687 | 93.256 | 91.773 | 33.118 | 1.00 | 0.00 | C |
| ATOM | 140 | OG  | SER | A | 687 | 93.381 | 90.824 | 32.070 | 1.00 | 0.00 | O |
| ATOM | 141 | N   | ARG | A | 688 | 92.333 | 88.960 | 33.849 | 1.00 | 0.00 | N |
| ATOM | 142 | CA  | ARG | A | 688 | 92.599 | 87.604 | 34.223 | 1.00 | 0.00 | C |
| ATOM | 143 | C   | ARG | A | 688 | 94.051 | 87.311 | 34.008 | 1.00 | 0.00 | C |
| ATOM | 144 | O   | ARG | A | 688 | 94.836 | 88.190 | 33.659 | 1.00 | 0.00 | O |
| ATOM | 145 | CB  | ARG | A | 688 | 91.781 | 86.586 | 33.410 | 1.00 | 0.00 | C |
| ATOM | 146 | CG  | ARG | A | 688 | 92.029 | 86.663 | 31.904 | 1.00 | 0.00 | C |
| ATOM | 147 | CD  | ARG | A | 688 | 91.025 | 85.842 | 31.090 | 1.00 | 0.00 | C |
| ATOM | 148 | NE  | ARG | A | 688 | 89.767 | 86.635 | 31.007 | 1.00 | 0.00 | N |
| ATOM | 149 | CZ  | ARG | A | 688 | 88.563 | 86.004 | 30.878 | 1.00 | 0.00 | C |
| ATOM | 150 | NH1 | ARG | A | 688 | 88.498 | 84.641 | 30.885 | 1.00 | 0.00 | N |
| ATOM | 151 | NH2 | ARG | A | 688 | 87.420 | 86.740 | 30.739 | 1.00 | 0.00 | N |
| ATOM | 152 | N   | ASP | A | 689 | 94.422 | 86.039 | 34.240 | 1.00 | 0.00 | N |
| ATOM | 153 | CA  | ASP | A | 689 | 95.759 | 85.546 | 34.101 | 1.00 | 0.00 | C |
| ATOM | 154 | C   | ASP | A | 689 | 96.677 | 86.259 | 35.041 | 1.00 | 0.00 | C |
| ATOM | 155 | O   | ASP | A | 689 | 97.794 | 86.626 | 34.679 | 1.00 | 0.00 | O |
| ATOM | 156 | CB  | ASP | A | 689 | 96.327 | 85.687 | 32.677 | 1.00 | 0.00 | C |
| ATOM | 157 | CG  | ASP | A | 689 | 97.584 | 84.831 | 32.593 | 1.00 | 0.00 | C |
| ATOM | 158 | OD1 | ASP | A | 689 | 97.900 | 84.143 | 33.600 | 1.00 | 0.00 | O |
| ATOM | 159 | OD2 | ASP | A | 689 | 98.240 | 84.852 | 31.518 | 1.00 | 0.00 | O |
| ATOM | 160 | N   | THR | A | 690 | 96.212 | 86.477 | 36.286 | 1.00 | 0.00 | N |
| ATOM | 161 | CA  | THR | A | 690 | 97.053 | 87.047 | 37.299 | 1.00 | 0.00 | C |
| ATOM | 162 | C   | THR | A | 690 | 97.050 | 86.057 | 38.418 | 1.00 | 0.00 | C |
| ATOM | 163 | O   | THR | A | 690 | 96.168 | 85.204 | 38.499 | 1.00 | 0.00 | O |
| ATOM | 164 | CB  | THR | A | 690 | 96.559 | 88.353 | 37.861 | 1.00 | 0.00 | C |
| ATOM | 165 | CG2 | THR | A | 690 | 96.461 | 89.377 | 36.718 | 1.00 | 0.00 | C |
| ATOM | 166 | OG1 | THR | A | 690 | 95.297 | 88.181 | 38.487 | 1.00 | 0.00 | O |
| ATOM | 167 | N   | LYS | A | 691 | 98.062 | 86.123 | 39.304 | 1.00 | 0.00 | N |
| ATOM | 168 | CA  | LYS | A | 691 | 98.114 | 85.179 | 40.380 | 1.00 | 0.00 | C |
| ATOM | 169 | C   | LYS | A | 691 | 97.042 | 85.518 | 41.362 | 1.00 | 0.00 | C |

|      |     |     |           |         |        |        |      |      |     |
|------|-----|-----|-----------|---------|--------|--------|------|------|-----|
| ATOM | 170 | O   | LYS A 691 | 96.780  | 86.679 | 41.668 | 1.00 | 0.00 | O   |
| ATOM | 171 | CB  | LYS A 691 | 99.450  | 85.180 | 41.135 | 1.00 | 0.00 | C   |
| ATOM | 172 | CG  | LYS A 691 | 100.587 | 84.558 | 40.329 | 1.00 | 0.00 | C   |
| ATOM | 173 | CD  | LYS A 691 | 101.977 | 84.895 | 40.863 | 1.00 | 0.00 | C   |
| ATOM | 174 | CE  | LYS A 691 | 103.106 | 84.160 | 40.143 | 1.00 | 0.00 | C   |
| ATOM | 175 | NZ  | LYS A 691 | 104.413 | 84.546 | 40.717 | 1.00 | 0.00 | N1+ |
| ATOM | 176 | N   | ASN A 692 | 96.359  | 84.483 | 41.874 | 1.00 | 0.00 | N   |
| ATOM | 177 | CA  | ASN A 692 | 95.315  | 84.710 | 42.822 | 1.00 | 0.00 | C   |
| ATOM | 178 | C   | ASN A 692 | 95.917  | 85.187 | 44.106 | 1.00 | 0.00 | C   |
| ATOM | 179 | O   | ASN A 692 | 95.385  | 86.081 | 44.757 | 1.00 | 0.00 | O   |
| ATOM | 180 | CB  | ASN A 692 | 94.502  | 83.444 | 43.128 | 1.00 | 0.00 | C   |
| ATOM | 181 | CG  | ASN A 692 | 93.213  | 83.875 | 43.810 | 1.00 | 0.00 | C   |
| ATOM | 182 | ND2 | ASN A 692 | 92.059  | 83.402 | 43.269 | 1.00 | 0.00 | N   |
| ATOM | 183 | OD1 | ASN A 692 | 93.229  | 84.619 | 44.789 | 1.00 | 0.00 | O   |
| ATOM | 184 | N   | TRP A 693 | 97.064  | 84.598 | 44.494 | 1.00 | 0.00 | N   |
| ATOM | 185 | CA  | TRP A 693 | 97.645  | 84.922 | 45.762 | 1.00 | 0.00 | C   |
| ATOM | 186 | C   | TRP A 693 | 98.001  | 86.371 | 45.770 | 1.00 | 0.00 | C   |
| ATOM | 187 | O   | TRP A 693 | 97.775  | 87.070 | 46.756 | 1.00 | 0.00 | O   |
| ATOM | 188 | CB  | TRP A 693 | 98.927  | 84.126 | 46.078 | 1.00 | 0.00 | C   |
| ATOM | 189 | CG  | TRP A 693 | 100.111 | 84.409 | 45.180 | 1.00 | 0.00 | C   |
| ATOM | 190 | CD1 | TRP A 693 | 100.517 | 83.783 | 44.037 | 1.00 | 0.00 | C   |
| ATOM | 191 | CD2 | TRP A 693 | 101.076 | 85.437 | 45.445 | 1.00 | 0.00 | C   |
| ATOM | 192 | CE2 | TRP A 693 | 102.033 | 85.378 | 44.431 | 1.00 | 0.00 | C   |
| ATOM | 193 | CE3 | TRP A 693 | 101.163 | 86.354 | 46.453 | 1.00 | 0.00 | C   |
| ATOM | 194 | NE1 | TRP A 693 | 101.677 | 84.358 | 43.575 | 1.00 | 0.00 | N   |
| ATOM | 195 | CZ2 | TRP A 693 | 103.092 | 86.237 | 44.409 | 1.00 | 0.00 | C   |
| ATOM | 196 | CZ3 | TRP A 693 | 102.232 | 87.223 | 46.425 | 1.00 | 0.00 | C   |
| ATOM | 197 | CH2 | TRP A 693 | 103.178 | 87.166 | 45.424 | 1.00 | 0.00 | C   |
| ATOM | 198 | N   | LYS A 694 | 98.561  | 86.864 | 44.652 | 1.00 | 0.00 | N   |
| ATOM | 199 | CA  | LYS A 694 | 98.990  | 88.228 | 44.598 | 1.00 | 0.00 | C   |
| ATOM | 200 | C   | LYS A 694 | 97.801  | 89.123 | 44.752 | 1.00 | 0.00 | C   |
| ATOM | 201 | O   | LYS A 694 | 97.900  | 90.179 | 45.378 | 1.00 | 0.00 | O   |
| ATOM | 202 | CB  | LYS A 694 | 99.725  | 88.577 | 43.293 | 1.00 | 0.00 | C   |
| ATOM | 203 | CG  | LYS A 694 | 98.844  | 88.414 | 42.065 | 1.00 | 0.00 | C   |
| ATOM | 204 | CD  | LYS A 694 | 99.498  | 88.813 | 40.749 | 1.00 | 0.00 | C   |
| ATOM | 205 | CE  | LYS A 694 | 100.536 | 87.809 | 40.251 | 1.00 | 0.00 | C   |
| ATOM | 206 | NZ  | LYS A 694 | 100.835 | 88.072 | 38.828 | 1.00 | 0.00 | N1+ |
| ATOM | 207 | N   | ILE A 695 | 96.643  | 88.733 | 44.195 | 1.00 | 0.00 | N   |
| ATOM | 208 | CA  | ILE A 695 | 95.470  | 89.554 | 44.281 | 1.00 | 0.00 | C   |
| ATOM | 209 | C   | ILE A 695 | 95.115  | 89.685 | 45.730 | 1.00 | 0.00 | C   |
| ATOM | 210 | O   | ILE A 695 | 94.822  | 90.774 | 46.220 | 1.00 | 0.00 | O   |
| ATOM | 211 | CB  | ILE A 695 | 94.254  | 88.900 | 43.691 | 1.00 | 0.00 | C   |
| ATOM | 212 | CG1 | ILE A 695 | 94.492  | 88.352 | 42.282 | 1.00 | 0.00 | C   |
| ATOM | 213 | CG2 | ILE A 695 | 93.128  | 89.941 | 43.735 | 1.00 | 0.00 | C   |

|      |     |               |         |        |        |      |      |   |
|------|-----|---------------|---------|--------|--------|------|------|---|
| ATOM | 214 | CD1 ILE A 695 | 93.354  | 87.444 | 41.811 | 1.00 | 0.00 | C |
| ATOM | 215 | N ILE A 696   | 95.127  | 88.549 | 46.449 | 1.00 | 0.00 | N |
| ATOM | 216 | CA ILE A 696  | 94.740  | 88.521 | 47.828 | 1.00 | 0.00 | C |
| ATOM | 217 | C ILE A 696   | 95.707  | 89.335 | 48.618 | 1.00 | 0.00 | C |
| ATOM | 218 | O ILE A 696   | 95.310  | 90.107 | 49.490 | 1.00 | 0.00 | O |
| ATOM | 219 | CB ILE A 696  | 94.723  | 87.136 | 48.406 | 1.00 | 0.00 | C |
| ATOM | 220 | CG1 ILE A 696 | 93.698  | 86.260 | 47.665 | 1.00 | 0.00 | C |
| ATOM | 221 | CG2 ILE A 696 | 94.450  | 87.255 | 49.916 | 1.00 | 0.00 | C |
| ATOM | 222 | CD1 ILE A 696 | 93.803  | 84.775 | 48.008 | 1.00 | 0.00 | C |
| ATOM | 223 | N LEU A 697   | 97.012  | 89.196 | 48.326 | 1.00 | 0.00 | N |
| ATOM | 224 | CA LEU A 697  | 97.982  | 89.922 | 49.087 | 1.00 | 0.00 | C |
| ATOM | 225 | C LEU A 697   | 97.674  | 91.360 | 48.873 | 1.00 | 0.00 | C |
| ATOM | 226 | O LEU A 697   | 97.609  | 92.135 | 49.823 | 1.00 | 0.00 | O |
| ATOM | 227 | CB LEU A 697  | 99.428  | 89.648 | 48.614 | 1.00 | 0.00 | C |
| ATOM | 228 | CG LEU A 697  | 100.562 | 90.204 | 49.510 | 1.00 | 0.00 | C |
| ATOM | 229 | CD1 LEU A 697 | 101.936 | 89.854 | 48.914 | 1.00 | 0.00 | C |
| ATOM | 230 | CD2 LEU A 697 | 100.436 | 91.706 | 49.804 | 1.00 | 0.00 | C |
| ATOM | 231 | N CYS A 698   | 97.401  | 91.732 | 47.611 | 1.00 | 0.00 | N |
| ATOM | 232 | CA CYS A 698  | 97.160  | 93.098 | 47.270 | 1.00 | 0.00 | C |
| ATOM | 233 | C CYS A 698   | 95.987  | 93.562 | 48.060 | 1.00 | 0.00 | C |
| ATOM | 234 | O CYS A 698   | 95.958  | 94.708 | 48.496 | 1.00 | 0.00 | O |
| ATOM | 235 | CB CYS A 698  | 96.828  | 93.296 | 45.779 | 1.00 | 0.00 | C |
| ATOM | 236 | SG CYS A 698  | 98.249  | 92.944 | 44.703 | 1.00 | 0.00 | S |
| ATOM | 237 | N LEU A 699   | 95.016  | 92.666 | 48.299 | 1.00 | 0.00 | N |
| ATOM | 238 | CA LEU A 699  | 93.789  | 93.013 | 48.957 | 1.00 | 0.00 | C |
| ATOM | 239 | C LEU A 699   | 94.048  | 93.578 | 50.315 | 1.00 | 0.00 | C |
| ATOM | 240 | O LEU A 699   | 93.384  | 94.530 | 50.717 | 1.00 | 0.00 | O |
| ATOM | 241 | CB LEU A 699  | 92.875  | 91.799 | 49.184 | 1.00 | 0.00 | C |
| ATOM | 242 | CG LEU A 699  | 91.555  | 92.162 | 49.888 | 1.00 | 0.00 | C |
| ATOM | 243 | CD1 LEU A 699 | 90.604  | 92.912 | 48.945 | 1.00 | 0.00 | C |
| ATOM | 244 | CD2 LEU A 699 | 90.921  | 90.937 | 50.562 | 1.00 | 0.00 | C |
| ATOM | 245 | N PHE A 700   | 94.967  | 92.989 | 51.106 | 1.00 | 0.00 | N |
| ATOM | 246 | CA PHE A 700  | 95.141  | 93.549 | 52.416 | 1.00 | 0.00 | C |
| ATOM | 247 | C PHE A 700   | 95.787  | 94.908 | 52.332 | 1.00 | 0.00 | C |
| ATOM | 248 | O PHE A 700   | 95.305  | 95.880 | 52.909 | 1.00 | 0.00 | O |
| ATOM | 249 | CB PHE A 700  | 96.008  | 92.695 | 53.355 | 1.00 | 0.00 | C |
| ATOM | 250 | CG PHE A 700  | 95.790  | 93.250 | 54.717 | 1.00 | 0.00 | C |
| ATOM | 251 | CD1 PHE A 700 | 94.745  | 92.792 | 55.488 | 1.00 | 0.00 | C |
| ATOM | 252 | CD2 PHE A 700 | 96.607  | 94.234 | 55.225 | 1.00 | 0.00 | C |
| ATOM | 253 | CE1 PHE A 700 | 94.521  | 93.294 | 56.746 | 1.00 | 0.00 | C |
| ATOM | 254 | CE2 PHE A 700 | 96.386  | 94.741 | 56.484 | 1.00 | 0.00 | C |
| ATOM | 255 | CZ PHE A 700  | 95.344  | 94.272 | 57.247 | 1.00 | 0.00 | C |
| ATOM | 256 | N ILE A 701   | 96.903  | 94.957 | 51.582 | 1.00 | 0.00 | N |
| ATOM | 257 | CA ILE A 701  | 97.857  | 96.000 | 51.287 | 1.00 | 0.00 | C |

|      |     |     |           |         |         |        |      |      |   |
|------|-----|-----|-----------|---------|---------|--------|------|------|---|
| ATOM | 258 | C   | ILE A 701 | 97.352  | 97.090  | 50.361 | 1.00 | 0.00 | C |
| ATOM | 259 | O   | ILE A 701 | 98.046  | 98.075  | 50.124 | 1.00 | 0.00 | O |
| ATOM | 260 | CB  | ILE A 701 | 99.229  | 95.453  | 50.923 | 1.00 | 0.00 | C |
| ATOM | 261 | CG1 | ILE A 701 | 100.257 | 96.570  | 50.675 | 1.00 | 0.00 | C |
| ATOM | 262 | CG2 | ILE A 701 | 99.105  | 94.407  | 49.814 | 1.00 | 0.00 | C |
| ATOM | 263 | CD1 | ILE A 701 | 100.607 | 97.371  | 51.925 | 1.00 | 0.00 | C |
| ATOM | 264 | N   | ILE A 702 | 96.135  | 96.964  | 49.794 | 1.00 | 0.00 | N |
| ATOM | 265 | CA  | ILE A 702 | 95.701  | 97.713  | 48.637 | 1.00 | 0.00 | C |
| ATOM | 266 | C   | ILE A 702 | 96.022  | 99.182  | 48.629 | 1.00 | 0.00 | C |
| ATOM | 267 | O   | ILE A 702 | 96.551  | 99.587  | 47.597 | 1.00 | 0.00 | O |
| ATOM | 268 | CB  | ILE A 702 | 94.206  | 97.682  | 48.412 | 1.00 | 0.00 | C |
| ATOM | 269 | CG1 | ILE A 702 | 93.471  | 98.345  | 49.586 | 1.00 | 0.00 | C |
| ATOM | 270 | CG2 | ILE A 702 | 93.735  | 96.248  | 48.133 | 1.00 | 0.00 | C |
| ATOM | 271 | CD1 | ILE A 702 | 91.997  | 98.639  | 49.305 | 1.00 | 0.00 | C |
| ATOM | 272 | N   | PRO A 703 | 95.776  | 100.021 | 49.606 | 1.00 | 0.00 | N |
| ATOM | 273 | CA  | PRO A 703 | 96.023  | 101.440 | 49.446 | 1.00 | 0.00 | C |
| ATOM | 274 | C   | PRO A 703 | 97.396  | 101.785 | 48.935 | 1.00 | 0.00 | C |
| ATOM | 275 | O   | PRO A 703 | 97.487  | 102.557 | 47.981 | 1.00 | 0.00 | O |
| ATOM | 276 | CB  | PRO A 703 | 95.789  | 102.044 | 50.828 | 1.00 | 0.00 | C |
| ATOM | 277 | CG  | PRO A 703 | 96.192  | 100.903 | 51.777 | 1.00 | 0.00 | C |
| ATOM | 278 | CD  | PRO A 703 | 95.818  | 99.625  | 51.005 | 1.00 | 0.00 | C |
| ATOM | 279 | N   | LEU A 704 | 98.469  | 101.286 | 49.577 | 1.00 | 0.00 | N |
| ATOM | 280 | CA  | LEU A 704 | 99.799  | 101.567 | 49.106 | 1.00 | 0.00 | C |
| ATOM | 281 | C   | LEU A 704 | 100.136 | 100.746 | 47.888 | 1.00 | 0.00 | C |
| ATOM | 282 | O   | LEU A 704 | 100.499 | 101.276 | 46.841 | 1.00 | 0.00 | O |
| ATOM | 283 | CB  | LEU A 704 | 100.853 | 101.226 | 50.184 | 1.00 | 0.00 | C |
| ATOM | 284 | CG  | LEU A 704 | 102.302 | 101.725 | 49.958 | 1.00 | 0.00 | C |
| ATOM | 285 | CD1 | LEU A 704 | 103.194 | 101.243 | 51.107 | 1.00 | 0.00 | C |
| ATOM | 286 | CD2 | LEU A 704 | 102.908 | 101.366 | 48.592 | 1.00 | 0.00 | C |
| ATOM | 287 | N   | VAL A 705 | 100.005 | 99.411  | 48.040 | 1.00 | 0.00 | N |
| ATOM | 288 | CA  | VAL A 705 | 100.446 | 98.376  | 47.134 | 1.00 | 0.00 | C |
| ATOM | 289 | C   | VAL A 705 | 99.644  | 98.230  | 45.878 | 1.00 | 0.00 | C |
| ATOM | 290 | O   | VAL A 705 | 100.181 | 97.839  | 44.843 | 1.00 | 0.00 | O |
| ATOM | 291 | CB  | VAL A 705 | 100.422 | 97.024  | 47.767 | 1.00 | 0.00 | C |
| ATOM | 292 | CG1 | VAL A 705 | 98.950  | 96.628  | 47.926 | 1.00 | 0.00 | C |
| ATOM | 293 | CG2 | VAL A 705 | 101.244 | 96.049  | 46.906 | 1.00 | 0.00 | C |
| ATOM | 294 | N   | GLY A 706 | 98.333  | 98.510  | 45.933 | 1.00 | 0.00 | N |
| ATOM | 295 | CA  | GLY A 706 | 97.435  | 98.177  | 44.873 | 1.00 | 0.00 | C |
| ATOM | 296 | C   | GLY A 706 | 97.814  | 98.834  | 43.583 | 1.00 | 0.00 | C |
| ATOM | 297 | O   | GLY A 706 | 97.560  | 98.284  | 42.513 | 1.00 | 0.00 | O |
| ATOM | 298 | N   | CYS A 707 | 98.388  | 100.044 | 43.640 | 1.00 | 0.00 | N |
| ATOM | 299 | CA  | CYS A 707 | 98.618  | 100.754 | 42.419 | 1.00 | 0.00 | C |
| ATOM | 300 | C   | CYS A 707 | 99.505  | 100.008 | 41.464 | 1.00 | 0.00 | C |
| ATOM | 301 | O   | CYS A 707 | 99.133  | 99.799  | 40.310 | 1.00 | 0.00 | O |

|      |     |     |     |   |     |         |         |        |      |      |   |
|------|-----|-----|-----|---|-----|---------|---------|--------|------|------|---|
| ATOM | 302 | CB  | CYS | A | 707 | 99.277  | 102.127 | 42.643 | 1.00 | 0.00 | C |
| ATOM | 303 | SG  | CYS | A | 707 | 98.201  | 103.302 | 43.518 | 1.00 | 0.00 | S |
| ATOM | 304 | N   | GLY | A | 708 | 100.699 | 99.582  | 41.910 | 1.00 | 0.00 | N |
| ATOM | 305 | CA  | GLY | A | 708 | 101.654 | 99.058  | 40.970 | 1.00 | 0.00 | C |
| ATOM | 306 | C   | GLY | A | 708 | 101.321 | 97.734  | 40.336 | 1.00 | 0.00 | C |
| ATOM | 307 | O   | GLY | A | 708 | 101.309 | 97.623  | 39.110 | 1.00 | 0.00 | O |
| ATOM | 308 | N   | PHE | A | 709 | 101.040 | 96.693  | 41.142 | 1.00 | 0.00 | N |
| ATOM | 309 | CA  | PHE | A | 709 | 100.970 | 95.376  | 40.566 | 1.00 | 0.00 | C |
| ATOM | 310 | C   | PHE | A | 709 | 99.760  | 95.108  | 39.734 | 1.00 | 0.00 | C |
| ATOM | 311 | O   | PHE | A | 709 | 99.871  | 94.499  | 38.673 | 1.00 | 0.00 | O |
| ATOM | 312 | CB  | PHE | A | 709 | 101.060 | 94.220  | 41.572 | 1.00 | 0.00 | C |
| ATOM | 313 | CG  | PHE | A | 709 | 101.337 | 93.030  | 40.714 | 1.00 | 0.00 | C |
| ATOM | 314 | CD1 | PHE | A | 709 | 102.634 | 92.703  | 40.397 | 1.00 | 0.00 | C |
| ATOM | 315 | CD2 | PHE | A | 709 | 100.319 | 92.259  | 40.202 | 1.00 | 0.00 | C |
| ATOM | 316 | CE1 | PHE | A | 709 | 102.915 | 91.620  | 39.599 | 1.00 | 0.00 | C |
| ATOM | 317 | CE2 | PHE | A | 709 | 100.597 | 91.178  | 39.397 | 1.00 | 0.00 | C |
| ATOM | 318 | CZ  | PHE | A | 709 | 101.894 | 90.853  | 39.093 | 1.00 | 0.00 | C |
| ATOM | 319 | N   | VAL | A | 710 | 98.570  | 95.551  | 40.181 | 1.00 | 0.00 | N |
| ATOM | 320 | CA  | VAL | A | 710 | 97.371  | 95.104  | 39.532 | 1.00 | 0.00 | C |
| ATOM | 321 | C   | VAL | A | 710 | 97.375  | 95.449  | 38.074 | 1.00 | 0.00 | C |
| ATOM | 322 | O   | VAL | A | 710 | 97.494  | 96.604  | 37.664 | 1.00 | 0.00 | O |
| ATOM | 323 | CB  | VAL | A | 710 | 96.115  | 95.669  | 40.127 | 1.00 | 0.00 | C |
| ATOM | 324 | CG1 | VAL | A | 710 | 96.040  | 95.248  | 41.595 | 1.00 | 0.00 | C |
| ATOM | 325 | CG2 | VAL | A | 710 | 96.110  | 97.189  | 39.933 | 1.00 | 0.00 | C |
| ATOM | 326 | N   | SER | A | 711 | 97.229  | 94.405  | 37.237 | 1.00 | 0.00 | N |
| ATOM | 327 | CA  | SER | A | 711 | 97.141  | 94.663  | 35.836 | 1.00 | 0.00 | C |
| ATOM | 328 | C   | SER | A | 711 | 95.713  | 94.426  | 35.490 | 1.00 | 0.00 | C |
| ATOM | 329 | O   | SER | A | 711 | 95.310  | 93.318  | 35.149 | 1.00 | 0.00 | O |
| ATOM | 330 | CB  | SER | A | 711 | 97.954  | 93.681  | 34.970 | 1.00 | 0.00 | C |
| ATOM | 331 | OG  | SER | A | 711 | 99.339  | 93.789  | 35.256 | 1.00 | 0.00 | O |
| ATOM | 332 | N   | PHE | A | 712 | 94.907  | 95.493  | 35.564 | 1.00 | 0.00 | N |
| ATOM | 333 | CA  | PHE | A | 712 | 93.515  | 95.416  | 35.255 | 1.00 | 0.00 | C |
| ATOM | 334 | C   | PHE | A | 712 | 93.333  | 95.902  | 33.860 | 1.00 | 0.00 | C |
| ATOM | 335 | O   | PHE | A | 712 | 94.295  | 96.334  | 33.224 | 1.00 | 0.00 | O |
| ATOM | 336 | CB  | PHE | A | 712 | 92.649  | 96.222  | 36.245 | 1.00 | 0.00 | C |
| ATOM | 337 | CG  | PHE | A | 712 | 93.194  | 97.609  | 36.342 | 1.00 | 0.00 | C |
| ATOM | 338 | CD1 | PHE | A | 712 | 94.357  | 97.846  | 37.038 | 1.00 | 0.00 | C |
| ATOM | 339 | CD2 | PHE | A | 712 | 92.539  | 98.675  | 35.772 | 1.00 | 0.00 | C |
| ATOM | 340 | CE1 | PHE | A | 712 | 94.869  | 99.119  | 37.140 | 1.00 | 0.00 | C |
| ATOM | 341 | CE2 | PHE | A | 712 | 93.047  | 99.950  | 35.868 | 1.00 | 0.00 | C |
| ATOM | 342 | CZ  | PHE | A | 712 | 94.215  | 100.176 | 36.553 | 1.00 | 0.00 | C |
| ATOM | 343 | N   | ARG | A | 713 | 92.086  | 95.803  | 33.336 | 1.00 | 0.00 | N |
| ATOM | 344 | CA  | ARG | A | 713 | 91.796  | 96.304  | 32.020 | 1.00 | 0.00 | C |
| ATOM | 345 | C   | ARG | A | 713 | 92.291  | 97.722  | 32.019 | 1.00 | 0.00 | C |

|      |     |     |           |        |         |        |      |      |     |
|------|-----|-----|-----------|--------|---------|--------|------|------|-----|
| ATOM | 346 | O   | ARG A 713 | 92.423 | 98.347  | 33.065 | 1.00 | 0.00 | O   |
| ATOM | 347 | CB  | ARG A 713 | 90.301 | 96.284  | 31.652 | 1.00 | 0.00 | C   |
| ATOM | 348 | CG  | ARG A 713 | 89.772 | 94.862  | 31.419 | 1.00 | 0.00 | C   |
| ATOM | 349 | CD  | ARG A 713 | 88.324 | 94.801  | 30.920 | 1.00 | 0.00 | C   |
| ATOM | 350 | NE  | ARG A 713 | 88.028 | 93.374  | 30.602 | 1.00 | 0.00 | N   |
| ATOM | 351 | CZ  | ARG A 713 | 86.988 | 93.049  | 29.781 | 1.00 | 0.00 | C   |
| ATOM | 352 | NH1 | ARG A 713 | 86.183 | 94.026  | 29.273 | 1.00 | 0.00 | N   |
| ATOM | 353 | NH2 | ARG A 713 | 86.760 | 91.742  | 29.458 | 1.00 | 0.00 | N   |
| ATOM | 354 | N   | LYS A 714 | 92.511 | 98.298  | 30.836 | 1.00 | 0.00 | N   |
| ATOM | 355 | CA  | LYS A 714 | 93.361 | 99.446  | 30.653 | 1.00 | 0.00 | C   |
| ATOM | 356 | C   | LYS A 714 | 93.192 | 100.621 | 31.595 | 1.00 | 0.00 | C   |
| ATOM | 357 | O   | LYS A 714 | 94.199 | 101.048 | 32.146 | 1.00 | 0.00 | O   |
| ATOM | 358 | CB  | LYS A 714 | 93.237 | 99.987  | 29.219 | 1.00 | 0.00 | C   |
| ATOM | 359 | CG  | LYS A 714 | 94.301 | 101.013 | 28.841 | 1.00 | 0.00 | C   |
| ATOM | 360 | CD  | LYS A 714 | 94.361 | 101.276 | 27.334 | 1.00 | 0.00 | C   |
| ATOM | 361 | CE  | LYS A 714 | 95.413 | 102.308 | 26.931 | 1.00 | 0.00 | C   |
| ATOM | 362 | NZ  | LYS A 714 | 95.382 | 102.509 | 25.466 | 1.00 | 0.00 | N1+ |
| ATOM | 363 | N   | LYS A 715 | 91.983 | 101.164 | 31.841 | 1.00 | 0.00 | N   |
| ATOM | 364 | CA  | LYS A 715 | 91.755 | 102.364 | 32.636 | 1.00 | 0.00 | C   |
| ATOM | 365 | C   | LYS A 715 | 92.835 | 103.402 | 32.444 | 1.00 | 0.00 | C   |
| ATOM | 366 | O   | LYS A 715 | 93.637 | 103.665 | 33.340 | 1.00 | 0.00 | O   |
| ATOM | 367 | CB  | LYS A 715 | 91.681 | 102.062 | 34.138 | 1.00 | 0.00 | C   |
| ATOM | 368 | CG  | LYS A 715 | 90.648 | 100.988 | 34.462 | 1.00 | 0.00 | C   |
| ATOM | 369 | CD  | LYS A 715 | 89.234 | 101.361 | 34.031 | 1.00 | 0.00 | C   |
| ATOM | 370 | CE  | LYS A 715 | 88.409 | 101.932 | 35.180 | 1.00 | 0.00 | C   |
| ATOM | 371 | NZ  | LYS A 715 | 89.101 | 103.109 | 35.750 | 1.00 | 0.00 | N1+ |
| ATOM | 372 | N   | PRO A 716 | 92.817 | 104.037 | 31.295 | 1.00 | 0.00 | N   |
| ATOM | 373 | CA  | PRO A 716 | 93.797 | 105.021 | 30.889 | 1.00 | 0.00 | C   |
| ATOM | 374 | C   | PRO A 716 | 93.718 | 106.404 | 31.458 | 1.00 | 0.00 | C   |
| ATOM | 375 | O   | PRO A 716 | 94.637 | 107.173 | 31.183 | 1.00 | 0.00 | O   |
| ATOM | 376 | CB  | PRO A 716 | 93.741 | 105.059 | 29.360 | 1.00 | 0.00 | C   |
| ATOM | 377 | CG  | PRO A 716 | 92.355 | 104.496 | 29.014 | 1.00 | 0.00 | C   |
| ATOM | 378 | CD  | PRO A 716 | 92.075 | 103.516 | 30.159 | 1.00 | 0.00 | C   |
| ATOM | 379 | N   | VAL A 717 | 92.666 | 106.773 | 32.223 | 1.00 | 0.00 | N   |
| ATOM | 380 | CA  | VAL A 717 | 92.521 | 108.155 | 32.612 | 1.00 | 0.00 | C   |
| ATOM | 381 | C   | VAL A 717 | 93.752 | 108.650 | 33.300 | 1.00 | 0.00 | C   |
| ATOM | 382 | O   | VAL A 717 | 94.282 | 108.015 | 34.208 | 1.00 | 0.00 | O   |
| ATOM | 383 | CB  | VAL A 717 | 91.356 | 108.406 | 33.526 | 1.00 | 0.00 | C   |
| ATOM | 384 | CG1 | VAL A 717 | 91.602 | 107.667 | 34.851 | 1.00 | 0.00 | C   |
| ATOM | 385 | CG2 | VAL A 717 | 91.183 | 109.928 | 33.682 | 1.00 | 0.00 | C   |
| ATOM | 386 | N   | ASP A 718 | 94.251 | 109.817 | 32.837 | 1.00 | 0.00 | N   |
| ATOM | 387 | CA  | ASP A 718 | 95.422 | 110.437 | 33.386 | 1.00 | 0.00 | C   |
| ATOM | 388 | C   | ASP A 718 | 95.016 | 111.433 | 34.408 | 1.00 | 0.00 | C   |
| ATOM | 389 | O   | ASP A 718 | 93.931 | 111.360 | 34.983 | 1.00 | 0.00 | O   |

|        |     |     |           |         |         |        |      |      |     |
|--------|-----|-----|-----------|---------|---------|--------|------|------|-----|
| ATOM   | 390 | CB  | ASP A 718 | 96.299  | 111.183 | 32.366 | 1.00 | 0.00 | C   |
| ATOM   | 391 | CG  | ASP A 718 | 97.229  | 110.172 | 31.733 | 1.00 | 0.00 | C   |
| ATOM   | 392 | OD1 | ASP A 718 | 97.400  | 109.081 | 32.339 | 1.00 | 0.00 | O   |
| ATOM   | 393 | OD2 | ASP A 718 | 97.797  | 110.476 | 30.650 | 1.00 | 0.00 | O   |
| ATOM   | 394 | N   | LYS A 719 | 95.923  | 112.394 | 34.661 | 1.00 | 0.00 | N   |
| ATOM   | 395 | CA  | LYS A 719 | 95.684  | 113.411 | 35.638 | 1.00 | 0.00 | C   |
| ATOM   | 396 | C   | LYS A 719 | 95.601  | 112.734 | 36.957 | 1.00 | 0.00 | C   |
| ATOM   | 397 | O   | LYS A 719 | 95.008  | 113.255 | 37.903 | 1.00 | 0.00 | O   |
| ATOM   | 398 | CB  | LYS A 719 | 94.357  | 114.153 | 35.407 | 1.00 | 0.00 | C   |
| ATOM   | 399 | CG  | LYS A 719 | 94.353  | 115.054 | 34.171 | 1.00 | 0.00 | C   |
| ATOM   | 400 | CD  | LYS A 719 | 95.291  | 116.257 | 34.290 | 1.00 | 0.00 | C   |
| ATOM   | 401 | CE  | LYS A 719 | 94.743  | 117.354 | 35.207 | 1.00 | 0.00 | C   |
| ATOM   | 402 | NZ  | LYS A 719 | 95.694  | 118.488 | 35.275 | 1.00 | 0.00 | N1+ |
| HETATM | 403 | N   | HIE A 720 | 96.218  | 111.545 | 37.049 | 1.00 | 0.00 | N   |
| HETATM | 404 | CA  | HIE A 720 | 96.214  | 110.779 | 38.261 | 1.00 | 0.00 | C   |
| HETATM | 405 | C   | HIE A 720 | 94.797  | 110.460 | 38.595 | 1.00 | 0.00 | C   |
| HETATM | 406 | O   | HIE A 720 | 94.481  | 110.101 | 39.727 | 1.00 | 0.00 | O   |
| HETATM | 407 | CB  | HIE A 720 | 96.840  | 111.530 | 39.449 | 1.00 | 0.00 | C   |
| HETATM | 408 | CG  | HIE A 720 | 98.311  | 111.766 | 39.285 | 1.00 | 0.00 | C   |
| HETATM | 409 | CD2 | HIE A 720 | 98.981  | 112.823 | 38.745 | 1.00 | 0.00 | C   |
| HETATM | 410 | ND1 | HIE A 720 | 99.282  | 110.874 | 39.684 | 1.00 | 0.00 | N   |
| HETATM | 411 | CE1 | HIE A 720 | 100.478 | 111.427 | 39.370 | 1.00 | 0.00 | C   |
| HETATM | 412 | NE2 | HIE A 720 | 100.346 | 112.610 | 38.797 | 1.00 | 0.00 | N   |
| ATOM   | 413 | N   | LYS A 721 | 93.905  | 110.580 | 37.595 | 1.00 | 0.00 | N   |
| ATOM   | 414 | CA  | LYS A 721 | 92.534  | 110.205 | 37.768 | 1.00 | 0.00 | C   |
| ATOM   | 415 | C   | LYS A 721 | 92.547  | 108.728 | 37.908 | 1.00 | 0.00 | C   |
| ATOM   | 416 | O   | LYS A 721 | 91.784  | 108.143 | 38.668 | 1.00 | 0.00 | O   |
| ATOM   | 417 | CB  | LYS A 721 | 91.650  | 110.505 | 36.546 | 1.00 | 0.00 | C   |
| ATOM   | 418 | CG  | LYS A 721 | 91.080  | 111.920 | 36.497 | 1.00 | 0.00 | C   |
| ATOM   | 419 | CD  | LYS A 721 | 90.067  | 112.202 | 37.608 | 1.00 | 0.00 | C   |
| ATOM   | 420 | CE  | LYS A 721 | 90.646  | 112.098 | 39.018 | 1.00 | 0.00 | C   |
| ATOM   | 421 | NZ  | LYS A 721 | 89.595  | 112.379 | 40.021 | 1.00 | 0.00 | N1+ |
| ATOM   | 422 | N   | LYS A 722 | 93.483  | 108.103 | 37.176 | 1.00 | 0.00 | N   |
| ATOM   | 423 | CA  | LYS A 722 | 93.532  | 106.682 | 37.050 | 1.00 | 0.00 | C   |
| ATOM   | 424 | C   | LYS A 722 | 93.652  | 106.020 | 38.382 | 1.00 | 0.00 | C   |
| ATOM   | 425 | O   | LYS A 722 | 93.008  | 105.003 | 38.617 | 1.00 | 0.00 | O   |
| ATOM   | 426 | CB  | LYS A 722 | 94.717  | 106.189 | 36.202 | 1.00 | 0.00 | C   |
| ATOM   | 427 | CG  | LYS A 722 | 96.089  | 106.546 | 36.783 | 1.00 | 0.00 | C   |
| ATOM   | 428 | CD  | LYS A 722 | 96.331  | 108.052 | 36.905 | 1.00 | 0.00 | C   |
| ATOM   | 429 | CE  | LYS A 722 | 97.737  | 108.401 | 37.401 | 1.00 | 0.00 | C   |
| ATOM   | 430 | NZ  | LYS A 722 | 98.707  | 108.305 | 36.286 | 1.00 | 0.00 | N1+ |
| ATOM   | 431 | N   | LEU A 723 | 94.464  | 106.569 | 39.300 | 1.00 | 0.00 | N   |
| ATOM   | 432 | CA  | LEU A 723 | 94.686  | 105.882 | 40.536 | 1.00 | 0.00 | C   |
| ATOM   | 433 | C   | LEU A 723 | 93.383  | 105.704 | 41.265 | 1.00 | 0.00 | C   |



|      |     |     |           |        |         |        |      |      |   |
|------|-----|-----|-----------|--------|---------|--------|------|------|---|
| ATOM | 434 | O   | LEU A 723 | 93.042 | 104.591 | 41.664 | 1.00 | 0.00 | O |
| ATOM | 435 | CB  | LEU A 723 | 95.683 | 106.662 | 41.429 | 1.00 | 0.00 | C |
| ATOM | 436 | CG  | LEU A 723 | 96.098 | 106.032 | 42.779 | 1.00 | 0.00 | C |
| ATOM | 437 | CD1 | LEU A 723 | 97.217 | 106.864 | 43.427 | 1.00 | 0.00 | C |
| ATOM | 438 | CD2 | LEU A 723 | 94.922 | 105.862 | 43.753 | 1.00 | 0.00 | C |
| ATOM | 439 | N   | LEU A 724 | 92.599 | 106.790 | 41.427 | 1.00 | 0.00 | N |
| ATOM | 440 | CA  | LEU A 724 | 91.382 | 106.707 | 42.190 | 1.00 | 0.00 | C |
| ATOM | 441 | C   | LEU A 724 | 90.421 | 105.799 | 41.503 | 1.00 | 0.00 | C |
| ATOM | 442 | O   | LEU A 724 | 89.822 | 104.920 | 42.124 | 1.00 | 0.00 | O |
| ATOM | 443 | CB  | LEU A 724 | 90.656 | 108.059 | 42.316 | 1.00 | 0.00 | C |
| ATOM | 444 | CG  | LEU A 724 | 91.454 | 109.140 | 43.064 | 1.00 | 0.00 | C |
| ATOM | 445 | CD1 | LEU A 724 | 91.690 | 108.740 | 44.530 | 1.00 | 0.00 | C |
| ATOM | 446 | CD2 | LEU A 724 | 92.743 | 109.504 | 42.316 | 1.00 | 0.00 | C |
| ATOM | 447 | N   | TRP A 725 | 90.271 | 105.976 | 40.180 | 1.00 | 0.00 | N |
| ATOM | 448 | CA  | TRP A 725 | 89.321 | 105.211 | 39.439 | 1.00 | 0.00 | C |
| ATOM | 449 | C   | TRP A 725 | 89.721 | 103.775 | 39.521 | 1.00 | 0.00 | C |
| ATOM | 450 | O   | TRP A 725 | 88.880 | 102.891 | 39.663 | 1.00 | 0.00 | O |
| ATOM | 451 | CB  | TRP A 725 | 89.244 | 105.622 | 37.958 | 1.00 | 0.00 | C |
| ATOM | 452 | CG  | TRP A 725 | 88.644 | 106.992 | 37.726 | 1.00 | 0.00 | C |
| ATOM | 453 | CD1 | TRP A 725 | 89.257 | 108.208 | 37.622 | 1.00 | 0.00 | C |
| ATOM | 454 | CD2 | TRP A 725 | 87.235 | 107.237 | 37.579 | 1.00 | 0.00 | C |
| ATOM | 455 | CE2 | TRP A 725 | 87.076 | 108.612 | 37.393 | 1.00 | 0.00 | C |
| ATOM | 456 | CE3 | TRP A 725 | 86.166 | 106.390 | 37.598 | 1.00 | 0.00 | C |
| ATOM | 457 | NE1 | TRP A 725 | 88.325 | 109.194 | 37.424 | 1.00 | 0.00 | N |
| ATOM | 458 | CZ2 | TRP A 725 | 85.835 | 109.162 | 37.222 | 1.00 | 0.00 | C |
| ATOM | 459 | CZ3 | TRP A 725 | 84.919 | 106.948 | 37.422 | 1.00 | 0.00 | C |
| ATOM | 460 | CH2 | TRP A 725 | 84.757 | 108.306 | 37.241 | 1.00 | 0.00 | C |
| ATOM | 461 | N   | TYR A 726 | 91.034 | 103.504 | 39.458 | 1.00 | 0.00 | N |
| ATOM | 462 | CA  | TYR A 726 | 91.480 | 102.148 | 39.495 | 1.00 | 0.00 | C |
| ATOM | 463 | C   | TYR A 726 | 91.062 | 101.507 | 40.772 | 1.00 | 0.00 | C |
| ATOM | 464 | O   | TYR A 726 | 90.576 | 100.376 | 40.764 | 1.00 | 0.00 | O |
| ATOM | 465 | CB  | TYR A 726 | 93.003 | 101.965 | 39.422 | 1.00 | 0.00 | C |
| ATOM | 466 | CG  | TYR A 726 | 93.197 | 100.595 | 39.975 | 1.00 | 0.00 | C |
| ATOM | 467 | CD1 | TYR A 726 | 92.808 | 99.484  | 39.259 | 1.00 | 0.00 | C |
| ATOM | 468 | CD2 | TYR A 726 | 93.766 | 100.430 | 41.216 | 1.00 | 0.00 | C |
| ATOM | 469 | CE1 | TYR A 726 | 92.976 | 98.227  | 39.784 | 1.00 | 0.00 | C |
| ATOM | 470 | CE2 | TYR A 726 | 93.937 | 99.176  | 41.746 | 1.00 | 0.00 | C |
| ATOM | 471 | CZ  | TYR A 726 | 93.539 | 98.075  | 41.027 | 1.00 | 0.00 | C |
| ATOM | 472 | OH  | TYR A 726 | 93.718 | 96.787  | 41.566 | 1.00 | 0.00 | O |
| ATOM | 473 | N   | TYR A 727 | 91.235 | 102.201 | 41.907 | 1.00 | 0.00 | N |
| ATOM | 474 | CA  | TYR A 727 | 90.903 | 101.579 | 43.155 | 1.00 | 0.00 | C |
| ATOM | 475 | C   | TYR A 727 | 89.454 | 101.235 | 43.193 | 1.00 | 0.00 | C |
| ATOM | 476 | O   | TYR A 727 | 89.093 | 100.139 | 43.622 | 1.00 | 0.00 | O |
| ATOM | 477 | CB  | TYR A 727 | 91.233 | 102.438 | 44.389 | 1.00 | 0.00 | C |

|      |     |     |     |   |     |        |         |        |      |      |   |
|------|-----|-----|-----|---|-----|--------|---------|--------|------|------|---|
| ATOM | 478 | CG  | TYR | A | 727 | 92.688 | 102.278 | 44.659 | 1.00 | 0.00 | C |
| ATOM | 479 | CD1 | TYR | A | 727 | 93.117 | 101.198 | 45.392 | 1.00 | 0.00 | C |
| ATOM | 480 | CD2 | TYR | A | 727 | 93.619 | 103.177 | 44.192 | 1.00 | 0.00 | C |
| ATOM | 481 | CE1 | TYR | A | 727 | 94.452 | 101.013 | 45.663 | 1.00 | 0.00 | C |
| ATOM | 482 | CE2 | TYR | A | 727 | 94.957 | 102.998 | 44.459 | 1.00 | 0.00 | C |
| ATOM | 483 | CZ  | TYR | A | 727 | 95.372 | 101.915 | 45.195 | 1.00 | 0.00 | C |
| ATOM | 484 | OH  | TYR | A | 727 | 96.743 | 101.726 | 45.475 | 1.00 | 0.00 | O |
| ATOM | 485 | N   | VAL | A | 728 | 88.572 | 102.141 | 42.743 | 1.00 | 0.00 | N |
| ATOM | 486 | CA  | VAL | A | 728 | 87.178 | 101.818 | 42.830 | 1.00 | 0.00 | C |
| ATOM | 487 | C   | VAL | A | 728 | 86.914 | 100.615 | 41.976 | 1.00 | 0.00 | C |
| ATOM | 488 | O   | VAL | A | 728 | 86.186 | 99.708  | 42.379 | 1.00 | 0.00 | O |
| ATOM | 489 | CB  | VAL | A | 728 | 86.266 | 102.931 | 42.387 | 1.00 | 0.00 | C |
| ATOM | 490 | CG1 | VAL | A | 728 | 86.441 | 103.178 | 40.881 | 1.00 | 0.00 | C |
| ATOM | 491 | CG2 | VAL | A | 728 | 84.826 | 102.556 | 42.784 | 1.00 | 0.00 | C |
| ATOM | 492 | N   | ALA | A | 729 | 87.521 | 100.566 | 40.775 | 1.00 | 0.00 | N |
| ATOM | 493 | CA  | ALA | A | 729 | 87.323 | 99.484  | 39.853 | 1.00 | 0.00 | C |
| ATOM | 494 | C   | ALA | A | 729 | 87.811 | 98.221  | 40.484 | 1.00 | 0.00 | C |
| ATOM | 495 | O   | ALA | A | 729 | 87.236 | 97.153  | 40.289 | 1.00 | 0.00 | O |
| ATOM | 496 | CB  | ALA | A | 729 | 88.086 | 99.668  | 38.530 | 1.00 | 0.00 | C |
| ATOM | 497 | N   | PHE | A | 730 | 88.918 | 98.304  | 41.244 | 1.00 | 0.00 | N |
| ATOM | 498 | CA  | PHE | A | 730 | 89.436 | 97.134  | 41.890 | 1.00 | 0.00 | C |
| ATOM | 499 | C   | PHE | A | 730 | 88.407 | 96.654  | 42.864 | 1.00 | 0.00 | C |
| ATOM | 500 | O   | PHE | A | 730 | 88.164 | 95.454  | 42.982 | 1.00 | 0.00 | O |
| ATOM | 501 | CB  | PHE | A | 730 | 90.733 | 97.407  | 42.671 | 1.00 | 0.00 | C |
| ATOM | 502 | CG  | PHE | A | 730 | 91.141 | 96.129  | 43.323 | 1.00 | 0.00 | C |
| ATOM | 503 | CD1 | PHE | A | 730 | 91.737 | 95.127  | 42.592 | 1.00 | 0.00 | C |
| ATOM | 504 | CD2 | PHE | A | 730 | 90.935 | 95.934  | 44.670 | 1.00 | 0.00 | C |
| ATOM | 505 | CE1 | PHE | A | 730 | 92.119 | 93.951  | 43.191 | 1.00 | 0.00 | C |
| ATOM | 506 | CE2 | PHE | A | 730 | 91.313 | 94.760  | 45.273 | 1.00 | 0.00 | C |
| ATOM | 507 | CZ  | PHE | A | 730 | 91.906 | 93.764  | 44.536 | 1.00 | 0.00 | C |
| ATOM | 508 | N   | PHE | A | 731 | 87.767 | 97.598  | 43.576 | 1.00 | 0.00 | N |
| ATOM | 509 | CA  | PHE | A | 731 | 86.783 | 97.304  | 44.574 | 1.00 | 0.00 | C |
| ATOM | 510 | C   | PHE | A | 731 | 85.583 | 96.660  | 43.959 | 1.00 | 0.00 | C |
| ATOM | 511 | O   | PHE | A | 731 | 84.900 | 95.882  | 44.620 | 1.00 | 0.00 | O |
| ATOM | 512 | CB  | PHE | A | 731 | 86.310 | 98.530  | 45.376 | 1.00 | 0.00 | C |
| ATOM | 513 | CG  | PHE | A | 731 | 87.342 | 98.820  | 46.415 | 1.00 | 0.00 | C |
| ATOM | 514 | CD1 | PHE | A | 731 | 87.342 | 98.109  | 47.591 | 1.00 | 0.00 | C |
| ATOM | 515 | CD2 | PHE | A | 731 | 88.293 | 99.794  | 46.226 | 1.00 | 0.00 | C |
| ATOM | 516 | CE1 | PHE | A | 731 | 88.280 | 98.357  | 48.567 | 1.00 | 0.00 | C |
| ATOM | 517 | CE2 | PHE | A | 731 | 89.234 | 100.048 | 47.197 | 1.00 | 0.00 | C |
| ATOM | 518 | CZ  | PHE | A | 731 | 89.230 | 99.330  | 48.369 | 1.00 | 0.00 | C |
| ATOM | 519 | N   | THR | A | 732 | 85.266 | 96.990  | 42.694 | 1.00 | 0.00 | N |
| ATOM | 520 | CA  | THR | A | 732 | 84.079 | 96.474  | 42.070 | 1.00 | 0.00 | C |
| ATOM | 521 | C   | THR | A | 732 | 84.126 | 94.979  | 41.919 | 1.00 | 0.00 | C |

|      |     |     |           |        |        |        |      |      |   |
|------|-----|-----|-----------|--------|--------|--------|------|------|---|
| ATOM | 522 | O   | THR A 732 | 83.086 | 94.329 | 42.005 | 1.00 | 0.00 | O |
| ATOM | 523 | CB  | THR A 732 | 83.801 | 97.042 | 40.705 | 1.00 | 0.00 | C |
| ATOM | 524 | CG2 | THR A 732 | 83.800 | 98.579 | 40.807 | 1.00 | 0.00 | C |
| ATOM | 525 | OG1 | THR A 732 | 84.776 | 96.612 | 39.769 | 1.00 | 0.00 | O |
| ATOM | 526 | N   | SER A 733 | 85.310 | 94.375 | 41.679 | 1.00 | 0.00 | N |
| ATOM | 527 | CA  | SER A 733 | 85.356 | 92.961 | 41.396 | 1.00 | 0.00 | C |
| ATOM | 528 | C   | SER A 733 | 84.785 | 92.157 | 42.526 | 1.00 | 0.00 | C |
| ATOM | 529 | O   | SER A 733 | 85.082 | 92.366 | 43.700 | 1.00 | 0.00 | O |
| ATOM | 530 | CB  | SER A 733 | 86.774 | 92.429 | 41.108 | 1.00 | 0.00 | C |
| ATOM | 531 | OG  | SER A 733 | 87.578 | 92.510 | 42.274 | 1.00 | 0.00 | O |
| ATOM | 532 | N   | PRO A 734 | 83.939 | 91.228 | 42.153 | 1.00 | 0.00 | N |
| ATOM | 533 | CA  | PRO A 734 | 83.307 | 90.338 | 43.093 | 1.00 | 0.00 | C |
| ATOM | 534 | C   | PRO A 734 | 84.263 | 89.374 | 43.708 | 1.00 | 0.00 | C |
| ATOM | 535 | O   | PRO A 734 | 83.986 | 88.884 | 44.801 | 1.00 | 0.00 | O |
| ATOM | 536 | CB  | PRO A 734 | 82.179 | 89.648 | 42.329 | 1.00 | 0.00 | C |
| ATOM | 537 | CG  | PRO A 734 | 81.821 | 90.650 | 41.221 | 1.00 | 0.00 | C |
| ATOM | 538 | CD  | PRO A 734 | 83.130 | 91.412 | 40.957 | 1.00 | 0.00 | C |
| ATOM | 539 | N   | PHE A 735 | 85.372 | 89.054 | 43.014 | 1.00 | 0.00 | N |
| ATOM | 540 | CA  | PHE A 735 | 86.316 | 88.125 | 43.554 | 1.00 | 0.00 | C |
| ATOM | 541 | C   | PHE A 735 | 86.890 | 88.735 | 44.786 | 1.00 | 0.00 | C |
| ATOM | 542 | O   | PHE A 735 | 86.984 | 88.088 | 45.829 | 1.00 | 0.00 | O |
| ATOM | 543 | CB  | PHE A 735 | 87.484 | 87.831 | 42.593 | 1.00 | 0.00 | C |
| ATOM | 544 | CG  | PHE A 735 | 88.397 | 86.862 | 43.267 | 1.00 | 0.00 | C |
| ATOM | 545 | CD1 | PHE A 735 | 88.115 | 85.518 | 43.279 | 1.00 | 0.00 | C |
| ATOM | 546 | CD2 | PHE A 735 | 89.543 | 87.306 | 43.884 | 1.00 | 0.00 | C |
| ATOM | 547 | CE1 | PHE A 735 | 88.965 | 84.630 | 43.902 | 1.00 | 0.00 | C |
| ATOM | 548 | CE2 | PHE A 735 | 90.397 | 86.429 | 44.509 | 1.00 | 0.00 | C |
| ATOM | 549 | CZ  | PHE A 735 | 90.103 | 85.085 | 44.520 | 1.00 | 0.00 | C |
| ATOM | 550 | N   | VAL A 736 | 87.282 | 90.019 | 44.699 | 1.00 | 0.00 | N |
| ATOM | 551 | CA  | VAL A 736 | 87.864 | 90.657 | 45.838 | 1.00 | 0.00 | C |
| ATOM | 552 | C   | VAL A 736 | 86.813 | 90.776 | 46.891 | 1.00 | 0.00 | C |
| ATOM | 553 | O   | VAL A 736 | 87.087 | 90.611 | 48.076 | 1.00 | 0.00 | O |
| ATOM | 554 | CB  | VAL A 736 | 88.419 | 92.027 | 45.564 | 1.00 | 0.00 | C |
| ATOM | 555 | CG1 | VAL A 736 | 89.514 | 91.893 | 44.492 | 1.00 | 0.00 | C |
| ATOM | 556 | CG2 | VAL A 736 | 87.283 | 92.994 | 45.207 | 1.00 | 0.00 | C |
| ATOM | 557 | N   | VAL A 737 | 85.565 | 91.060 | 46.471 | 1.00 | 0.00 | N |
| ATOM | 558 | CA  | VAL A 737 | 84.493 | 91.233 | 47.403 | 1.00 | 0.00 | C |
| ATOM | 559 | C   | VAL A 737 | 84.296 | 89.955 | 48.154 | 1.00 | 0.00 | C |
| ATOM | 560 | O   | VAL A 737 | 84.115 | 89.970 | 49.368 | 1.00 | 0.00 | O |
| ATOM | 561 | CB  | VAL A 737 | 83.190 | 91.568 | 46.737 | 1.00 | 0.00 | C |
| ATOM | 562 | CG1 | VAL A 737 | 82.090 | 91.634 | 47.809 | 1.00 | 0.00 | C |
| ATOM | 563 | CG2 | VAL A 737 | 83.367 | 92.871 | 45.939 | 1.00 | 0.00 | C |
| ATOM | 564 | N   | PHE A 738 | 84.334 | 88.814 | 47.444 | 1.00 | 0.00 | N |
| ATOM | 565 | CA  | PHE A 738 | 84.108 | 87.548 | 48.078 | 1.00 | 0.00 | C |

|      |     |     |           |        |        |        |      |      |   |
|------|-----|-----|-----------|--------|--------|--------|------|------|---|
| ATOM | 566 | C   | PHE A 738 | 85.175 | 87.294 | 49.091 | 1.00 | 0.00 | C |
| ATOM | 567 | O   | PHE A 738 | 84.884 | 86.926 | 50.228 | 1.00 | 0.00 | O |
| ATOM | 568 | CB  | PHE A 738 | 84.133 | 86.372 | 47.085 | 1.00 | 0.00 | C |
| ATOM | 569 | CG  | PHE A 738 | 83.915 | 85.130 | 47.877 | 1.00 | 0.00 | C |
| ATOM | 570 | CD1 | PHE A 738 | 82.649 | 84.753 | 48.259 | 1.00 | 0.00 | C |
| ATOM | 571 | CD2 | PHE A 738 | 84.981 | 84.339 | 48.233 | 1.00 | 0.00 | C |
| ATOM | 572 | CE1 | PHE A 738 | 82.452 | 83.603 | 48.988 | 1.00 | 0.00 | C |
| ATOM | 573 | CE2 | PHE A 738 | 84.790 | 83.187 | 48.961 | 1.00 | 0.00 | C |
| ATOM | 574 | CZ  | PHE A 738 | 83.523 | 82.819 | 49.342 | 1.00 | 0.00 | C |
| ATOM | 575 | N   | SER A 739 | 86.446 | 87.500 | 48.707 | 1.00 | 0.00 | N |
| ATOM | 576 | CA  | SER A 739 | 87.538 | 87.229 | 49.598 | 1.00 | 0.00 | C |
| ATOM | 577 | C   | SER A 739 | 87.427 | 88.151 | 50.768 | 1.00 | 0.00 | C |
| ATOM | 578 | O   | SER A 739 | 87.692 | 87.765 | 51.906 | 1.00 | 0.00 | O |
| ATOM | 579 | CB  | SER A 739 | 88.912 | 87.478 | 48.948 | 1.00 | 0.00 | C |
| ATOM | 580 | OG  | SER A 739 | 89.060 | 88.851 | 48.612 | 1.00 | 0.00 | O |
| ATOM | 581 | N   | TRP A 740 | 87.026 | 89.405 | 50.511 | 1.00 | 0.00 | N |
| ATOM | 582 | CA  | TRP A 740 | 86.918 | 90.369 | 51.559 | 1.00 | 0.00 | C |
| ATOM | 583 | C   | TRP A 740 | 85.854 | 89.934 | 52.512 | 1.00 | 0.00 | C |
| ATOM | 584 | O   | TRP A 740 | 86.028 | 90.000 | 53.727 | 1.00 | 0.00 | O |
| ATOM | 585 | CB  | TRP A 740 | 86.564 | 91.770 | 51.035 | 1.00 | 0.00 | C |
| ATOM | 586 | CG  | TRP A 740 | 86.481 | 92.821 | 52.111 | 1.00 | 0.00 | C |
| ATOM | 587 | CD1 | TRP A 740 | 85.389 | 93.359 | 52.726 | 1.00 | 0.00 | C |
| ATOM | 588 | CD2 | TRP A 740 | 87.631 | 93.435 | 52.712 | 1.00 | 0.00 | C |
| ATOM | 589 | CE2 | TRP A 740 | 87.166 | 94.335 | 53.669 | 1.00 | 0.00 | C |
| ATOM | 590 | CE3 | TRP A 740 | 88.964 | 93.261 | 52.480 | 1.00 | 0.00 | C |
| ATOM | 591 | NE1 | TRP A 740 | 85.787 | 94.279 | 53.666 | 1.00 | 0.00 | N |
| ATOM | 592 | CZ2 | TRP A 740 | 88.033 | 95.076 | 54.420 | 1.00 | 0.00 | C |
| ATOM | 593 | CZ3 | TRP A 740 | 89.838 | 94.012 | 53.235 | 1.00 | 0.00 | C |
| ATOM | 594 | CH2 | TRP A 740 | 89.381 | 94.902 | 54.184 | 1.00 | 0.00 | C |
| ATOM | 595 | N   | ASN A 741 | 84.716 | 89.458 | 51.974 | 1.00 | 0.00 | N |
| ATOM | 596 | CA  | ASN A 741 | 83.613 | 89.085 | 52.811 | 1.00 | 0.00 | C |
| ATOM | 597 | C   | ASN A 741 | 84.033 | 87.972 | 53.713 | 1.00 | 0.00 | C |
| ATOM | 598 | O   | ASN A 741 | 83.752 | 88.008 | 54.910 | 1.00 | 0.00 | O |
| ATOM | 599 | CB  | ASN A 741 | 82.397 | 88.597 | 52.007 | 1.00 | 0.00 | C |
| ATOM | 600 | CG  | ASN A 741 | 81.811 | 89.792 | 51.265 | 1.00 | 0.00 | C |
| ATOM | 601 | ND2 | ASN A 741 | 81.360 | 89.559 | 50.004 | 1.00 | 0.00 | N |
| ATOM | 602 | OD1 | ASN A 741 | 81.760 | 90.905 | 51.791 | 1.00 | 0.00 | O |
| ATOM | 603 | N   | VAL A 742 | 84.730 | 86.952 | 53.178 | 1.00 | 0.00 | N |
| ATOM | 604 | CA  | VAL A 742 | 85.094 | 85.849 | 54.018 | 1.00 | 0.00 | C |
| ATOM | 605 | C   | VAL A 742 | 86.021 | 86.332 | 55.090 | 1.00 | 0.00 | C |
| ATOM | 606 | O   | VAL A 742 | 85.866 | 85.969 | 56.255 | 1.00 | 0.00 | O |
| ATOM | 607 | CB  | VAL A 742 | 85.754 | 84.714 | 53.285 | 1.00 | 0.00 | C |
| ATOM | 608 | CG1 | VAL A 742 | 84.745 | 84.138 | 52.276 | 1.00 | 0.00 | C |
| ATOM | 609 | CG2 | VAL A 742 | 87.063 | 85.204 | 52.647 | 1.00 | 0.00 | C |

|      |     |     |           |        |        |        |      |      |   |
|------|-----|-----|-----------|--------|--------|--------|------|------|---|
| ATOM | 610 | N   | VAL A 743 | 87.002 | 87.179 | 54.734 | 1.00 | 0.00 | N |
| ATOM | 611 | CA  | VAL A 743 | 87.950 | 87.631 | 55.711 | 1.00 | 0.00 | C |
| ATOM | 612 | C   | VAL A 743 | 87.230 | 88.405 | 56.771 | 1.00 | 0.00 | C |
| ATOM | 613 | O   | VAL A 743 | 87.465 | 88.212 | 57.963 | 1.00 | 0.00 | O |
| ATOM | 614 | CB  | VAL A 743 | 88.995 | 88.537 | 55.134 | 1.00 | 0.00 | C |
| ATOM | 615 | CG1 | VAL A 743 | 89.896 | 89.028 | 56.279 | 1.00 | 0.00 | C |
| ATOM | 616 | CG2 | VAL A 743 | 89.752 | 87.779 | 54.028 | 1.00 | 0.00 | C |
| ATOM | 617 | N   | PHE A 744 | 86.318 | 89.299 | 56.361 | 1.00 | 0.00 | N |
| ATOM | 618 | CA  | PHE A 744 | 85.614 | 90.150 | 57.280 | 1.00 | 0.00 | C |
| ATOM | 619 | C   | PHE A 744 | 84.766 | 89.313 | 58.176 | 1.00 | 0.00 | C |
| ATOM | 620 | O   | PHE A 744 | 84.724 | 89.528 | 59.386 | 1.00 | 0.00 | O |
| ATOM | 621 | CB  | PHE A 744 | 84.677 | 91.131 | 56.553 | 1.00 | 0.00 | C |
| ATOM | 622 | CG  | PHE A 744 | 84.060 | 92.041 | 57.559 | 1.00 | 0.00 | C |
| ATOM | 623 | CD1 | PHE A 744 | 84.700 | 93.201 | 57.927 | 1.00 | 0.00 | C |
| ATOM | 624 | CD2 | PHE A 744 | 82.848 | 91.739 | 58.134 | 1.00 | 0.00 | C |
| ATOM | 625 | CE1 | PHE A 744 | 84.139 | 94.050 | 58.852 | 1.00 | 0.00 | C |
| ATOM | 626 | CE2 | PHE A 744 | 82.281 | 92.584 | 59.061 | 1.00 | 0.00 | C |
| ATOM | 627 | CZ  | PHE A 744 | 82.925 | 93.744 | 59.420 | 1.00 | 0.00 | C |
| ATOM | 628 | N   | TYR A 745 | 84.068 | 88.317 | 57.601 | 1.00 | 0.00 | N |
| ATOM | 629 | CA  | TYR A 745 | 83.145 | 87.556 | 58.378 | 1.00 | 0.00 | C |
| ATOM | 630 | C   | TYR A 745 | 83.898 | 86.807 | 59.426 | 1.00 | 0.00 | C |
| ATOM | 631 | O   | TYR A 745 | 83.444 | 86.702 | 60.563 | 1.00 | 0.00 | O |
| ATOM | 632 | CB  | TYR A 745 | 82.329 | 86.541 | 57.565 | 1.00 | 0.00 | C |
| ATOM | 633 | CG  | TYR A 745 | 81.170 | 86.212 | 58.435 | 1.00 | 0.00 | C |
| ATOM | 634 | CD1 | TYR A 745 | 81.276 | 85.314 | 59.468 | 1.00 | 0.00 | C |
| ATOM | 635 | CD2 | TYR A 745 | 79.961 | 86.831 | 58.216 | 1.00 | 0.00 | C |
| ATOM | 636 | CE1 | TYR A 745 | 80.186 | 85.034 | 60.263 | 1.00 | 0.00 | C |
| ATOM | 637 | CE2 | TYR A 745 | 78.871 | 86.559 | 59.006 | 1.00 | 0.00 | C |
| ATOM | 638 | CZ  | TYR A 745 | 78.985 | 85.653 | 60.034 | 1.00 | 0.00 | C |
| ATOM | 639 | OH  | TYR A 745 | 77.869 | 85.369 | 60.846 | 1.00 | 0.00 | O |
| ATOM | 640 | N   | ILE A 746 | 85.071 | 86.252 | 59.069 | 1.00 | 0.00 | N |
| ATOM | 641 | CA  | ILE A 746 | 85.813 | 85.490 | 60.028 | 1.00 | 0.00 | C |
| ATOM | 642 | C   | ILE A 746 | 86.214 | 86.410 | 61.132 | 1.00 | 0.00 | C |
| ATOM | 643 | O   | ILE A 746 | 86.096 | 86.072 | 62.304 | 1.00 | 0.00 | O |
| ATOM | 644 | CB  | ILE A 746 | 87.037 | 84.821 | 59.458 | 1.00 | 0.00 | C |
| ATOM | 645 | CG1 | ILE A 746 | 88.163 | 85.792 | 59.054 | 1.00 | 0.00 | C |
| ATOM | 646 | CG2 | ILE A 746 | 86.539 | 83.995 | 58.269 | 1.00 | 0.00 | C |
| ATOM | 647 | CD1 | ILE A 746 | 89.051 | 86.248 | 60.212 | 1.00 | 0.00 | C |
| ATOM | 648 | N   | ALA A 747 | 86.663 | 87.629 | 60.784 | 1.00 | 0.00 | N |
| ATOM | 649 | CA  | ALA A 747 | 87.127 | 88.544 | 61.782 | 1.00 | 0.00 | C |
| ATOM | 650 | C   | ALA A 747 | 85.985 | 88.824 | 62.699 | 1.00 | 0.00 | C |
| ATOM | 651 | O   | ALA A 747 | 86.150 | 88.891 | 63.915 | 1.00 | 0.00 | O |
| ATOM | 652 | CB  | ALA A 747 | 87.590 | 89.888 | 61.194 | 1.00 | 0.00 | C |
| ATOM | 653 | N   | PHE A 748 | 84.784 | 88.975 | 62.121 | 1.00 | 0.00 | N |

|      |     |     |           |        |        |        |      |      |   |
|------|-----|-----|-----------|--------|--------|--------|------|------|---|
| ATOM | 654 | CA  | PHE A 748 | 83.612 | 89.281 | 62.881 | 1.00 | 0.00 | C |
| ATOM | 655 | C   | PHE A 748 | 83.366 | 88.148 | 63.827 | 1.00 | 0.00 | C |
| ATOM | 656 | O   | PHE A 748 | 83.042 | 88.362 | 64.993 | 1.00 | 0.00 | O |
| ATOM | 657 | CB  | PHE A 748 | 82.371 | 89.443 | 61.984 | 1.00 | 0.00 | C |
| ATOM | 658 | CG  | PHE A 748 | 81.199 | 89.756 | 62.845 | 1.00 | 0.00 | C |
| ATOM | 659 | CD1 | PHE A 748 | 80.964 | 91.045 | 63.267 | 1.00 | 0.00 | C |
| ATOM | 660 | CD2 | PHE A 748 | 80.325 | 88.761 | 63.220 | 1.00 | 0.00 | C |
| ATOM | 661 | CE1 | PHE A 748 | 79.877 | 91.334 | 64.060 | 1.00 | 0.00 | C |
| ATOM | 662 | CE2 | PHE A 748 | 79.238 | 89.046 | 64.011 | 1.00 | 0.00 | C |
| ATOM | 663 | CZ  | PHE A 748 | 79.012 | 90.333 | 64.432 | 1.00 | 0.00 | C |
| ATOM | 664 | N   | LEU A 749 | 83.530 | 86.903 | 63.340 | 1.00 | 0.00 | N |
| ATOM | 665 | CA  | LEU A 749 | 83.254 | 85.746 | 64.141 | 1.00 | 0.00 | C |
| ATOM | 666 | C   | LEU A 749 | 84.184 | 85.704 | 65.315 | 1.00 | 0.00 | C |
| ATOM | 667 | O   | LEU A 749 | 83.763 | 85.438 | 66.440 | 1.00 | 0.00 | O |
| ATOM | 668 | CB  | LEU A 749 | 83.412 | 84.435 | 63.355 | 1.00 | 0.00 | C |
| ATOM | 669 | CG  | LEU A 749 | 83.055 | 83.192 | 64.185 | 1.00 | 0.00 | C |
| ATOM | 670 | CD1 | LEU A 749 | 81.596 | 83.261 | 64.651 | 1.00 | 0.00 | C |
| ATOM | 671 | CD2 | LEU A 749 | 83.360 | 81.893 | 63.427 | 1.00 | 0.00 | C |
| ATOM | 672 | N   | LEU A 750 | 85.479 | 85.981 | 65.086 | 1.00 | 0.00 | N |
| ATOM | 673 | CA  | LEU A 750 | 86.458 | 85.930 | 66.133 | 1.00 | 0.00 | C |
| ATOM | 674 | C   | LEU A 750 | 86.152 | 86.970 | 67.169 | 1.00 | 0.00 | C |
| ATOM | 675 | O   | LEU A 750 | 86.230 | 86.697 | 68.364 | 1.00 | 0.00 | O |
| ATOM | 676 | CB  | LEU A 750 | 87.879 | 86.162 | 65.593 | 1.00 | 0.00 | C |
| ATOM | 677 | CG  | LEU A 750 | 88.468 | 84.929 | 64.878 | 1.00 | 0.00 | C |
| ATOM | 678 | CD1 | LEU A 750 | 87.500 | 84.315 | 63.860 | 1.00 | 0.00 | C |
| ATOM | 679 | CD2 | LEU A 750 | 89.803 | 85.288 | 64.215 | 1.00 | 0.00 | C |
| ATOM | 680 | N   | LEU A 751 | 85.775 | 88.187 | 66.737 | 1.00 | 0.00 | N |
| ATOM | 681 | CA  | LEU A 751 | 85.496 | 89.244 | 67.665 | 1.00 | 0.00 | C |
| ATOM | 682 | C   | LEU A 751 | 84.315 | 88.841 | 68.490 | 1.00 | 0.00 | C |
| ATOM | 683 | O   | LEU A 751 | 84.255 | 89.114 | 69.687 | 1.00 | 0.00 | O |
| ATOM | 684 | CB  | LEU A 751 | 85.131 | 90.573 | 66.975 | 1.00 | 0.00 | C |
| ATOM | 685 | CG  | LEU A 751 | 86.285 | 91.189 | 66.165 | 1.00 | 0.00 | C |
| ATOM | 686 | CD1 | LEU A 751 | 85.863 | 92.515 | 65.511 | 1.00 | 0.00 | C |
| ATOM | 687 | CD2 | LEU A 751 | 87.560 | 91.324 | 67.018 | 1.00 | 0.00 | C |
| ATOM | 688 | N   | PHE A 752 | 83.349 | 88.166 | 67.849 | 1.00 | 0.00 | N |
| ATOM | 689 | CA  | PHE A 752 | 82.128 | 87.741 | 68.464 | 1.00 | 0.00 | C |
| ATOM | 690 | C   | PHE A 752 | 82.458 | 86.786 | 69.573 | 1.00 | 0.00 | C |
| ATOM | 691 | O   | PHE A 752 | 81.915 | 86.888 | 70.670 | 1.00 | 0.00 | O |
| ATOM | 692 | CB  | PHE A 752 | 81.247 | 87.012 | 67.432 | 1.00 | 0.00 | C |
| ATOM | 693 | CG  | PHE A 752 | 79.900 | 86.707 | 67.990 | 1.00 | 0.00 | C |
| ATOM | 694 | CD1 | PHE A 752 | 78.915 | 87.667 | 67.991 | 1.00 | 0.00 | C |
| ATOM | 695 | CD2 | PHE A 752 | 79.617 | 85.458 | 68.491 | 1.00 | 0.00 | C |
| ATOM | 696 | CE1 | PHE A 752 | 77.669 | 87.392 | 68.497 | 1.00 | 0.00 | C |
| ATOM | 697 | CE2 | PHE A 752 | 78.369 | 85.175 | 68.999 | 1.00 | 0.00 | C |

|      |     |     |     |   |     |        |        |        |      |      |   |
|------|-----|-----|-----|---|-----|--------|--------|--------|------|------|---|
| ATOM | 698 | CZ  | PHE | A | 752 | 77.392 | 86.142 | 68.999 | 1.00 | 0.00 | C |
| ATOM | 699 | N   | ALA | A | 753 | 83.364 | 85.827 | 69.303 | 1.00 | 0.00 | N |
| ATOM | 700 | CA  | ALA | A | 753 | 83.750 | 84.845 | 70.274 | 1.00 | 0.00 | C |
| ATOM | 701 | C   | ALA | A | 753 | 84.426 | 85.533 | 71.418 | 1.00 | 0.00 | C |
| ATOM | 702 | O   | ALA | A | 753 | 84.207 | 85.193 | 72.578 | 1.00 | 0.00 | O |
| ATOM | 703 | CB  | ALA | A | 753 | 84.730 | 83.799 | 69.709 | 1.00 | 0.00 | C |
| ATOM | 704 | N   | TYR | A | 754 | 85.260 | 86.541 | 71.106 | 1.00 | 0.00 | N |
| ATOM | 705 | CA  | TYR | A | 754 | 86.001 | 87.257 | 72.105 | 1.00 | 0.00 | C |
| ATOM | 706 | C   | TYR | A | 754 | 85.015 | 87.883 | 73.025 | 1.00 | 0.00 | C |
| ATOM | 707 | O   | TYR | A | 754 | 85.185 | 87.863 | 74.245 | 1.00 | 0.00 | O |
| ATOM | 708 | CB  | TYR | A | 754 | 86.856 | 88.386 | 71.497 | 1.00 | 0.00 | C |
| ATOM | 709 | CG  | TYR | A | 754 | 87.534 | 89.127 | 72.600 | 1.00 | 0.00 | C |
| ATOM | 710 | CD1 | TYR | A | 754 | 88.645 | 88.604 | 73.218 | 1.00 | 0.00 | C |
| ATOM | 711 | CD2 | TYR | A | 754 | 87.067 | 90.357 | 73.006 | 1.00 | 0.00 | C |
| ATOM | 712 | CE1 | TYR | A | 754 | 89.273 | 89.289 | 74.231 | 1.00 | 0.00 | C |
| ATOM | 713 | CE2 | TYR | A | 754 | 87.691 | 91.049 | 74.019 | 1.00 | 0.00 | C |
| ATOM | 714 | CZ  | TYR | A | 754 | 88.796 | 90.513 | 74.632 | 1.00 | 0.00 | C |
| ATOM | 715 | OH  | TYR | A | 754 | 89.438 | 91.219 | 75.673 | 1.00 | 0.00 | O |
| ATOM | 716 | N   | VAL | A | 755 | 83.941 | 88.454 | 72.453 | 1.00 | 0.00 | N |
| ATOM | 717 | CA  | VAL | A | 755 | 82.930 | 89.103 | 73.224 | 1.00 | 0.00 | C |
| ATOM | 718 | C   | VAL | A | 755 | 82.299 | 88.089 | 74.120 | 1.00 | 0.00 | C |
| ATOM | 719 | O   | VAL | A | 755 | 81.941 | 88.395 | 75.256 | 1.00 | 0.00 | O |
| ATOM | 720 | CB  | VAL | A | 755 | 81.843 | 89.690 | 72.377 | 1.00 | 0.00 | C |
| ATOM | 721 | CG1 | VAL | A | 755 | 80.782 | 90.290 | 73.312 | 1.00 | 0.00 | C |
| ATOM | 722 | CG2 | VAL | A | 755 | 82.471 | 90.700 | 71.404 | 1.00 | 0.00 | C |
| ATOM | 723 | N   | LEU | A | 756 | 82.145 | 86.842 | 73.635 | 1.00 | 0.00 | N |
| ATOM | 724 | CA  | LEU | A | 756 | 81.492 | 85.826 | 74.409 | 1.00 | 0.00 | C |
| ATOM | 725 | C   | LEU | A | 756 | 82.222 | 85.653 | 75.701 | 1.00 | 0.00 | C |
| ATOM | 726 | O   | LEU | A | 756 | 81.612 | 85.648 | 76.768 | 1.00 | 0.00 | O |
| ATOM | 727 | CB  | LEU | A | 756 | 81.545 | 84.443 | 73.729 | 1.00 | 0.00 | C |
| ATOM | 728 | CG  | LEU | A | 756 | 80.650 | 84.294 | 72.485 | 1.00 | 0.00 | C |
| ATOM | 729 | CD1 | LEU | A | 756 | 80.796 | 82.903 | 71.849 | 1.00 | 0.00 | C |
| ATOM | 730 | CD2 | LEU | A | 756 | 79.193 | 84.595 | 72.843 | 1.00 | 0.00 | C |
| ATOM | 731 | N   | LEU | A | 757 | 83.555 | 85.512 | 75.631 | 1.00 | 0.00 | N |
| ATOM | 732 | CA  | LEU | A | 757 | 84.339 | 85.297 | 76.811 | 1.00 | 0.00 | C |
| ATOM | 733 | C   | LEU | A | 757 | 84.290 | 86.552 | 77.639 | 1.00 | 0.00 | C |
| ATOM | 734 | O   | LEU | A | 757 | 84.188 | 86.511 | 78.862 | 1.00 | 0.00 | O |
| ATOM | 735 | CB  | LEU | A | 757 | 85.812 | 85.003 | 76.458 | 1.00 | 0.00 | C |
| ATOM | 736 | CG  | LEU | A | 757 | 86.702 | 84.466 | 77.602 | 1.00 | 0.00 | C |
| ATOM | 737 | CD1 | LEU | A | 757 | 88.132 | 84.218 | 77.102 | 1.00 | 0.00 | C |
| ATOM | 738 | CD2 | LEU | A | 757 | 86.672 | 85.347 | 78.860 | 1.00 | 0.00 | C |
| ATOM | 739 | N   | MET | A | 758 | 84.347 | 87.698 | 76.940 | 1.00 | 0.00 | N |
| ATOM | 740 | CA  | MET | A | 758 | 84.440 | 89.047 | 77.419 | 1.00 | 0.00 | C |
| ATOM | 741 | C   | MET | A | 758 | 83.199 | 89.503 | 78.141 | 1.00 | 0.00 | C |

|        |     |     |           |        |        |        |      |      |   |
|--------|-----|-----|-----------|--------|--------|--------|------|------|---|
| ATOM   | 742 | O   | MET A 758 | 83.276 | 90.403 | 78.978 | 1.00 | 0.00 | O |
| ATOM   | 743 | CB  | MET A 758 | 84.679 | 90.021 | 76.255 | 1.00 | 0.00 | C |
| ATOM   | 744 | CG  | MET A 758 | 84.957 | 91.460 | 76.678 | 1.00 | 0.00 | C |
| ATOM   | 745 | SD  | MET A 758 | 85.241 | 92.602 | 75.289 | 1.00 | 0.00 | S |
| ATOM   | 746 | CE  | MET A 758 | 85.495 | 94.064 | 76.336 | 1.00 | 0.00 | C |
| ATOM   | 747 | N   | ASP A 759 | 82.035 | 88.908 | 77.826 | 1.00 | 0.00 | N |
| ATOM   | 748 | CA  | ASP A 759 | 80.732 | 89.359 | 78.256 | 1.00 | 0.00 | C |
| ATOM   | 749 | C   | ASP A 759 | 80.696 | 89.814 | 79.686 | 1.00 | 0.00 | C |
| ATOM   | 750 | O   | ASP A 759 | 81.324 | 89.233 | 80.573 | 1.00 | 0.00 | O |
| ATOM   | 751 | CB  | ASP A 759 | 79.649 | 88.274 | 78.084 | 1.00 | 0.00 | C |
| ATOM   | 752 | CG  | ASP A 759 | 78.271 | 88.915 | 78.169 | 1.00 | 0.00 | C |
| ATOM   | 753 | OD1 | ASP A 759 | 78.192 | 90.173 | 78.130 | 1.00 | 0.00 | O |
| ATOM   | 754 | OD2 | ASP A 759 | 77.273 | 88.151 | 78.267 | 1.00 | 0.00 | O |
| ATOM   | 755 | N   | PHE A 760 | 79.955 | 90.922 | 79.916 | 1.00 | 0.00 | N |
| ATOM   | 756 | CA  | PHE A 760 | 79.779 | 91.527 | 81.206 | 1.00 | 0.00 | C |
| ATOM   | 757 | C   | PHE A 760 | 78.299 | 91.679 | 81.403 | 1.00 | 0.00 | C |
| ATOM   | 758 | O   | PHE A 760 | 77.539 | 91.709 | 80.438 | 1.00 | 0.00 | O |
| ATOM   | 759 | CB  | PHE A 760 | 80.437 | 92.917 | 81.292 | 1.00 | 0.00 | C |
| ATOM   | 760 | CG  | PHE A 760 | 80.391 | 93.393 | 82.703 | 1.00 | 0.00 | C |
| ATOM   | 761 | CD1 | PHE A 760 | 81.290 | 92.923 | 83.631 | 1.00 | 0.00 | C |
| ATOM   | 762 | CD2 | PHE A 760 | 79.458 | 94.323 | 83.100 | 1.00 | 0.00 | C |
| ATOM   | 763 | CE1 | PHE A 760 | 81.250 | 93.362 | 84.934 | 1.00 | 0.00 | C |
| ATOM   | 764 | CE2 | PHE A 760 | 79.411 | 94.768 | 84.397 | 1.00 | 0.00 | C |
| ATOM   | 765 | CZ  | PHE A 760 | 80.309 | 94.288 | 85.321 | 1.00 | 0.00 | C |
| HETATM | 766 | N   | HIE A 761 | 77.842 | 91.758 | 82.671 | 1.00 | 0.00 | N |
| HETATM | 767 | CA  | HIE A 761 | 76.434 | 91.852 | 82.945 | 1.00 | 0.00 | C |
| HETATM | 768 | C   | HIE A 761 | 75.967 | 93.242 | 82.669 | 1.00 | 0.00 | C |
| HETATM | 769 | O   | HIE A 761 | 76.750 | 94.189 | 82.718 | 1.00 | 0.00 | O |
| HETATM | 770 | CB  | HIE A 761 | 76.057 | 91.518 | 84.400 | 1.00 | 0.00 | C |
| HETATM | 771 | CG  | HIE A 761 | 74.572 | 91.468 | 84.614 | 1.00 | 0.00 | C |
| HETATM | 772 | CD2 | HIE A 761 | 73.717 | 90.411 | 84.572 | 1.00 | 0.00 | C |
| HETATM | 773 | ND1 | HIE A 761 | 73.791 | 92.567 | 84.895 | 1.00 | 0.00 | N |
| HETATM | 774 | CE1 | HIE A 761 | 72.515 | 92.124 | 85.003 | 1.00 | 0.00 | C |
| HETATM | 775 | NE2 | HIE A 761 | 72.420 | 90.821 | 84.816 | 1.00 | 0.00 | N |
| ATOM   | 776 | N   | SER A 762 | 74.674 | 93.389 | 82.314 | 1.00 | 0.00 | N |
| ATOM   | 777 | CA  | SER A 762 | 74.114 | 94.692 | 82.103 | 1.00 | 0.00 | C |
| ATOM   | 778 | C   | SER A 762 | 74.498 | 95.156 | 80.740 | 1.00 | 0.00 | C |
| ATOM   | 779 | O   | SER A 762 | 74.605 | 94.369 | 79.804 | 1.00 | 0.00 | O |
| ATOM   | 780 | CB  | SER A 762 | 74.554 | 95.767 | 83.114 | 1.00 | 0.00 | C |
| ATOM   | 781 | OG  | SER A 762 | 74.089 | 95.438 | 84.413 | 1.00 | 0.00 | O |
| ATOM   | 782 | N   | VAL A 763 | 74.687 | 96.483 | 80.609 | 1.00 | 0.00 | N |
| ATOM   | 783 | CA  | VAL A 763 | 75.026 | 97.066 | 79.347 | 1.00 | 0.00 | C |
| ATOM   | 784 | C   | VAL A 763 | 76.372 | 96.564 | 78.934 | 1.00 | 0.00 | C |
| ATOM   | 785 | O   | VAL A 763 | 77.302 | 96.436 | 79.731 | 1.00 | 0.00 | O |



|        |     |               |        |         |        |      |      |   |
|--------|-----|---------------|--------|---------|--------|------|------|---|
| ATOM   | 786 | CB VAL A 763  | 75.086 | 98.565  | 79.377 | 1.00 | 0.00 | C |
| ATOM   | 787 | CG1 VAL A 763 | 76.188 | 98.990  | 80.359 | 1.00 | 0.00 | C |
| ATOM   | 788 | CG2 VAL A 763 | 75.303 | 99.076  | 77.943 | 1.00 | 0.00 | C |
| ATOM   | 789 | N PRO A 764   | 76.431 | 96.244  | 77.670 | 1.00 | 0.00 | N |
| ATOM   | 790 | CA PRO A 764  | 77.654 | 95.755  | 77.083 | 1.00 | 0.00 | C |
| ATOM   | 791 | C PRO A 764   | 78.612 | 96.854  | 76.766 | 1.00 | 0.00 | C |
| ATOM   | 792 | O PRO A 764   | 78.222 | 98.020  | 76.783 | 1.00 | 0.00 | O |
| ATOM   | 793 | CB PRO A 764  | 77.240 | 94.976  | 75.835 | 1.00 | 0.00 | C |
| ATOM   | 794 | CG PRO A 764  | 75.808 | 94.519  | 76.142 | 1.00 | 0.00 | C |
| ATOM   | 795 | CD PRO A 764  | 75.263 | 95.607  | 77.078 | 1.00 | 0.00 | C |
| HETATM | 796 | N HIE A 765   | 79.875 | 96.488  | 76.472 | 1.00 | 0.00 | N |
| HETATM | 797 | CA HIE A 765  | 80.885 | 97.446  | 76.134 | 1.00 | 0.00 | C |
| HETATM | 798 | C HIE A 765   | 80.598 | 97.868  | 74.724 | 1.00 | 0.00 | C |
| HETATM | 799 | O HIE A 765   | 79.836 | 97.214  | 74.012 | 1.00 | 0.00 | O |
| HETATM | 800 | CB HIE A 765  | 82.311 | 96.867  | 76.226 | 1.00 | 0.00 | C |
| HETATM | 801 | CG HIE A 765  | 83.368 | 97.913  | 76.439 | 1.00 | 0.00 | C |
| HETATM | 802 | CD2 HIE A 765 | 84.316 | 98.413  | 75.604 | 1.00 | 0.00 | C |
| HETATM | 803 | ND1 HIE A 765 | 83.543 | 98.568  | 77.638 | 1.00 | 0.00 | N |
| HETATM | 804 | CE1 HIE A 765 | 84.580 | 99.426  | 77.469 | 1.00 | 0.00 | C |
| HETATM | 805 | NE2 HIE A 765 | 85.083 | 99.367  | 76.249 | 1.00 | 0.00 | N |
| ATOM   | 806 | N PRO A 766   | 81.154 | 98.972  | 74.303 | 1.00 | 0.00 | N |
| ATOM   | 807 | CA PRO A 766  | 80.858 | 99.477  | 72.991 | 1.00 | 0.00 | C |
| ATOM   | 808 | C PRO A 766   | 81.235 | 98.579  | 71.856 | 1.00 | 0.00 | C |
| ATOM   | 809 | O PRO A 766   | 80.571 | 98.670  | 70.825 | 1.00 | 0.00 | O |
| ATOM   | 810 | CB PRO A 766  | 81.486 | 100.867 | 72.940 | 1.00 | 0.00 | C |
| ATOM   | 811 | CG PRO A 766  | 81.432 | 101.335 | 74.406 | 1.00 | 0.00 | C |
| ATOM   | 812 | CD PRO A 766  | 81.504 | 100.037 | 75.229 | 1.00 | 0.00 | C |
| ATOM   | 813 | N PRO A 767   | 82.244 | 97.762  | 71.953 | 1.00 | 0.00 | N |
| ATOM   | 814 | CA PRO A 767  | 82.537 | 96.905  | 70.839 | 1.00 | 0.00 | C |
| ATOM   | 815 | C PRO A 767   | 81.445 | 95.915  | 70.624 | 1.00 | 0.00 | C |
| ATOM   | 816 | O PRO A 767   | 81.221 | 95.513  | 69.482 | 1.00 | 0.00 | O |
| ATOM   | 817 | CB PRO A 767  | 83.909 | 96.306  | 71.134 | 1.00 | 0.00 | C |
| ATOM   | 818 | CG PRO A 767  | 84.598 | 97.404  | 71.966 | 1.00 | 0.00 | C |
| ATOM   | 819 | CD PRO A 767  | 83.445 | 98.134  | 72.678 | 1.00 | 0.00 | C |
| ATOM   | 820 | N GLU A 768   | 80.767 | 95.496  | 71.708 | 1.00 | 0.00 | N |
| ATOM   | 821 | CA GLU A 768  | 79.684 | 94.568  | 71.581 | 1.00 | 0.00 | C |
| ATOM   | 822 | C GLU A 768   | 78.594 | 95.254  | 70.831 | 1.00 | 0.00 | C |
| ATOM   | 823 | O GLU A 768   | 77.941 | 94.659  | 69.977 | 1.00 | 0.00 | O |
| ATOM   | 824 | CB GLU A 768  | 79.111 | 94.128  | 72.940 | 1.00 | 0.00 | C |
| ATOM   | 825 | CG GLU A 768  | 77.942 | 93.148  | 72.822 | 1.00 | 0.00 | C |
| ATOM   | 826 | CD GLU A 768  | 78.476 | 91.827  | 72.299 | 1.00 | 0.00 | C |
| ATOM   | 827 | OE1 GLU A 768 | 79.271 | 91.859  | 71.319 | 1.00 | 0.00 | O |
| ATOM   | 828 | OE2 GLU A 768 | 78.105 | 90.765  | 72.872 | 1.00 | 0.00 | O |
| ATOM   | 829 | N LEU A 769   | 78.382 | 96.547  | 71.133 | 1.00 | 0.00 | N |

|      |     |     |     |   |     |        |         |        |      |      |   |
|------|-----|-----|-----|---|-----|--------|---------|--------|------|------|---|
| ATOM | 830 | CA  | LEU | A | 769 | 77.352 | 97.297  | 70.477 | 1.00 | 0.00 | C |
| ATOM | 831 | C   | LEU | A | 769 | 77.683 | 97.349  | 69.032 | 1.00 | 0.00 | C |
| ATOM | 832 | O   | LEU | A | 769 | 76.807 | 97.240  | 68.176 | 1.00 | 0.00 | O |
| ATOM | 833 | CB  | LEU | A | 769 | 77.233 | 98.743  | 70.981 | 1.00 | 0.00 | C |
| ATOM | 834 | CG  | LEU | A | 769 | 76.680 | 98.811  | 72.410 | 1.00 | 0.00 | C |
| ATOM | 835 | CD1 | LEU | A | 769 | 76.512 | 100.257 | 72.894 | 1.00 | 0.00 | C |
| ATOM | 836 | CD2 | LEU | A | 769 | 75.391 | 97.981  | 72.509 | 1.00 | 0.00 | C |
| ATOM | 837 | N   | VAL | A | 770 | 78.980 | 97.499  | 68.721 | 1.00 | 0.00 | N |
| ATOM | 838 | CA  | VAL | A | 770 | 79.376 | 97.572  | 67.351 | 1.00 | 0.00 | C |
| ATOM | 839 | C   | VAL | A | 770 | 78.968 | 96.296  | 66.700 | 1.00 | 0.00 | C |
| ATOM | 840 | O   | VAL | A | 770 | 78.451 | 96.296  | 65.584 | 1.00 | 0.00 | O |
| ATOM | 841 | CB  | VAL | A | 770 | 80.858 | 97.714  | 67.174 | 1.00 | 0.00 | C |
| ATOM | 842 | CG1 | VAL | A | 770 | 81.168 | 97.700  | 65.667 | 1.00 | 0.00 | C |
| ATOM | 843 | CG2 | VAL | A | 770 | 81.320 | 98.988  | 67.897 | 1.00 | 0.00 | C |
| ATOM | 844 | N   | LEU | A | 771 | 79.156 | 95.165  | 67.400 | 1.00 | 0.00 | N |
| ATOM | 845 | CA  | LEU | A | 771 | 78.835 | 93.888  | 66.836 | 1.00 | 0.00 | C |
| ATOM | 846 | C   | LEU | A | 771 | 77.374 | 93.867  | 66.533 | 1.00 | 0.00 | C |
| ATOM | 847 | O   | LEU | A | 771 | 76.952 | 93.313  | 65.519 | 1.00 | 0.00 | O |
| ATOM | 848 | CB  | LEU | A | 771 | 79.138 | 92.716  | 67.782 | 1.00 | 0.00 | C |
| ATOM | 849 | CG  | LEU | A | 771 | 80.638 | 92.571  | 68.095 | 1.00 | 0.00 | C |
| ATOM | 850 | CD1 | LEU | A | 771 | 80.913 | 91.332  | 68.964 | 1.00 | 0.00 | C |
| ATOM | 851 | CD2 | LEU | A | 771 | 81.481 | 92.587  | 66.808 | 1.00 | 0.00 | C |
| ATOM | 852 | N   | TYR | A | 772 | 76.555 | 94.481  | 67.408 | 1.00 | 0.00 | N |
| ATOM | 853 | CA  | TYR | A | 772 | 75.144 | 94.484  | 67.168 | 1.00 | 0.00 | C |
| ATOM | 854 | C   | TYR | A | 772 | 74.914 | 95.170  | 65.864 | 1.00 | 0.00 | C |
| ATOM | 855 | O   | TYR | A | 772 | 74.104 | 94.729  | 65.051 | 1.00 | 0.00 | O |
| ATOM | 856 | CB  | TYR | A | 772 | 74.341 | 95.231  | 68.246 | 1.00 | 0.00 | C |
| ATOM | 857 | CG  | TYR | A | 772 | 74.395 | 94.406  | 69.488 | 1.00 | 0.00 | C |
| ATOM | 858 | CD1 | TYR | A | 772 | 73.575 | 93.310  | 69.619 | 1.00 | 0.00 | C |
| ATOM | 859 | CD2 | TYR | A | 772 | 75.249 | 94.730  | 70.515 | 1.00 | 0.00 | C |
| ATOM | 860 | CE1 | TYR | A | 772 | 73.612 | 92.543  | 70.758 | 1.00 | 0.00 | C |
| ATOM | 861 | CE2 | TYR | A | 772 | 75.289 | 93.964  | 71.655 | 1.00 | 0.00 | C |
| ATOM | 862 | CZ  | TYR | A | 772 | 74.471 | 92.867  | 71.777 | 1.00 | 0.00 | C |
| ATOM | 863 | OH  | TYR | A | 772 | 74.507 | 92.079  | 72.947 | 1.00 | 0.00 | O |
| ATOM | 864 | N   | SER | A | 773 | 75.651 | 96.266  | 65.629 | 1.00 | 0.00 | N |
| ATOM | 865 | CA  | SER | A | 773 | 75.518 | 97.024  | 64.423 | 1.00 | 0.00 | C |
| ATOM | 866 | C   | SER | A | 773 | 75.815 | 96.130  | 63.257 | 1.00 | 0.00 | C |
| ATOM | 867 | O   | SER | A | 773 | 75.092 | 96.142  | 62.262 | 1.00 | 0.00 | O |
| ATOM | 868 | CB  | SER | A | 773 | 76.522 | 98.184  | 64.387 | 1.00 | 0.00 | C |
| ATOM | 869 | OG  | SER | A | 773 | 76.522 | 98.783  | 63.103 | 1.00 | 0.00 | O |
| ATOM | 870 | N   | LEU | A | 774 | 76.883 | 95.314  | 63.357 | 1.00 | 0.00 | N |
| ATOM | 871 | CA  | LEU | A | 774 | 77.242 | 94.442  | 62.276 | 1.00 | 0.00 | C |
| ATOM | 872 | C   | LEU | A | 774 | 76.139 | 93.459  | 62.050 | 1.00 | 0.00 | C |
| ATOM | 873 | O   | LEU | A | 774 | 75.833 | 93.110  | 60.912 | 1.00 | 0.00 | O |

|      |     |     |     |   |     |        |        |        |      |      |   |
|------|-----|-----|-----|---|-----|--------|--------|--------|------|------|---|
| ATOM | 874 | CB  | LEU | A | 774 | 78.541 | 93.647 | 62.513 | 1.00 | 0.00 | C |
| ATOM | 875 | CG  | LEU | A | 774 | 79.833 | 94.477 | 62.358 | 1.00 | 0.00 | C |
| ATOM | 876 | CD1 | LEU | A | 774 | 80.032 | 94.926 | 60.902 | 1.00 | 0.00 | C |
| ATOM | 877 | CD2 | LEU | A | 774 | 79.885 | 95.653 | 63.342 | 1.00 | 0.00 | C |
| ATOM | 878 | N   | VAL | A | 775 | 75.500 | 92.985 | 63.130 | 1.00 | 0.00 | N |
| ATOM | 879 | CA  | VAL | A | 775 | 74.432 | 92.041 | 62.969 | 1.00 | 0.00 | C |
| ATOM | 880 | C   | VAL | A | 775 | 73.377 | 92.713 | 62.155 | 1.00 | 0.00 | C |
| ATOM | 881 | O   | VAL | A | 775 | 72.760 | 92.095 | 61.285 | 1.00 | 0.00 | O |
| ATOM | 882 | CB  | VAL | A | 775 | 73.818 | 91.652 | 64.283 | 1.00 | 0.00 | C |
| ATOM | 883 | CG1 | VAL | A | 775 | 72.605 | 90.752 | 64.009 | 1.00 | 0.00 | C |
| ATOM | 884 | CG2 | VAL | A | 775 | 74.903 | 90.989 | 65.152 | 1.00 | 0.00 | C |
| ATOM | 885 | N   | PHE | A | 776 | 73.156 | 94.011 | 62.417 | 1.00 | 0.00 | N |
| ATOM | 886 | CA  | PHE | A | 776 | 72.163 | 94.771 | 61.721 | 1.00 | 0.00 | C |
| ATOM | 887 | C   | PHE | A | 776 | 72.495 | 94.813 | 60.264 | 1.00 | 0.00 | C |
| ATOM | 888 | O   | PHE | A | 776 | 71.618 | 94.617 | 59.425 | 1.00 | 0.00 | O |
| ATOM | 889 | CB  | PHE | A | 776 | 72.089 | 96.230 | 62.206 | 1.00 | 0.00 | C |
| ATOM | 890 | CG  | PHE | A | 776 | 71.225 | 96.985 | 61.254 | 1.00 | 0.00 | C |
| ATOM | 891 | CD1 | PHE | A | 776 | 69.854 | 96.893 | 61.310 | 1.00 | 0.00 | C |
| ATOM | 892 | CD2 | PHE | A | 776 | 71.796 | 97.799 | 60.302 | 1.00 | 0.00 | C |
| ATOM | 893 | CE1 | PHE | A | 776 | 69.069 | 97.596 | 60.428 | 1.00 | 0.00 | C |
| ATOM | 894 | CE2 | PHE | A | 776 | 71.017 | 98.505 | 59.413 | 1.00 | 0.00 | C |
| ATOM | 895 | CZ  | PHE | A | 776 | 69.649 | 98.402 | 59.477 | 1.00 | 0.00 | C |
| ATOM | 896 | N   | VAL | A | 777 | 73.771 | 95.055 | 59.914 | 1.00 | 0.00 | N |
| ATOM | 897 | CA  | VAL | A | 777 | 74.092 | 95.166 | 58.518 | 1.00 | 0.00 | C |
| ATOM | 898 | C   | VAL | A | 777 | 73.801 | 93.862 | 57.852 | 1.00 | 0.00 | C |
| ATOM | 899 | O   | VAL | A | 777 | 73.277 | 93.821 | 56.739 | 1.00 | 0.00 | O |
| ATOM | 900 | CB  | VAL | A | 777 | 75.520 | 95.542 | 58.236 | 1.00 | 0.00 | C |
| ATOM | 901 | CG1 | VAL | A | 777 | 76.443 | 94.354 | 58.552 | 1.00 | 0.00 | C |
| ATOM | 902 | CG2 | VAL | A | 777 | 75.611 | 96.016 | 56.776 | 1.00 | 0.00 | C |
| ATOM | 903 | N   | LEU | A | 778 | 74.120 | 92.740 | 58.523 | 1.00 | 0.00 | N |
| ATOM | 904 | CA  | LEU | A | 778 | 73.898 | 91.451 | 57.941 | 1.00 | 0.00 | C |
| ATOM | 905 | C   | LEU | A | 778 | 72.427 | 91.282 | 57.744 | 1.00 | 0.00 | C |
| ATOM | 906 | O   | LEU | A | 778 | 71.981 | 90.740 | 56.733 | 1.00 | 0.00 | O |
| ATOM | 907 | CB  | LEU | A | 778 | 74.379 | 90.313 | 58.855 | 1.00 | 0.00 | C |
| ATOM | 908 | CG  | LEU | A | 778 | 75.883 | 90.390 | 59.181 | 1.00 | 0.00 | C |
| ATOM | 909 | CD1 | LEU | A | 778 | 76.330 | 89.213 | 60.059 | 1.00 | 0.00 | C |
| ATOM | 910 | CD2 | LEU | A | 778 | 76.725 | 90.545 | 57.905 | 1.00 | 0.00 | C |
| ATOM | 911 | N   | PHE | A | 779 | 71.630 | 91.755 | 58.717 | 1.00 | 0.00 | N |
| ATOM | 912 | CA  | PHE | A | 779 | 70.207 | 91.605 | 58.663 | 1.00 | 0.00 | C |
| ATOM | 913 | C   | PHE | A | 779 | 69.669 | 92.310 | 57.460 | 1.00 | 0.00 | C |
| ATOM | 914 | O   | PHE | A | 779 | 68.880 | 91.744 | 56.704 | 1.00 | 0.00 | O |
| ATOM | 915 | CB  | PHE | A | 779 | 69.499 | 92.199 | 59.890 | 1.00 | 0.00 | C |
| ATOM | 916 | CG  | PHE | A | 779 | 68.041 | 91.981 | 59.688 | 1.00 | 0.00 | C |
| ATOM | 917 | CD1 | PHE | A | 779 | 67.467 | 90.772 | 60.002 | 1.00 | 0.00 | C |

|        |     |               |        |        |        |      |      |     |
|--------|-----|---------------|--------|--------|--------|------|------|-----|
| ATOM   | 918 | CD2 PHE A 779 | 67.253 | 92.990 | 59.187 | 1.00 | 0.00 | C   |
| ATOM   | 919 | CE1 PHE A 779 | 66.123 | 90.574 | 59.813 | 1.00 | 0.00 | C   |
| ATOM   | 920 | CE2 PHE A 779 | 65.908 | 92.798 | 58.996 | 1.00 | 0.00 | C   |
| ATOM   | 921 | CZ PHE A 779  | 65.340 | 91.587 | 59.311 | 1.00 | 0.00 | C   |
| ATOM   | 922 | N CYS A 780   | 70.088 | 93.569 | 57.237 | 1.00 | 0.00 | N   |
| ATOM   | 923 | CA CYS A 780  | 69.535 | 94.302 | 56.134 | 1.00 | 0.00 | C   |
| ATOM   | 924 | C CYS A 780   | 69.918 | 93.638 | 54.847 | 1.00 | 0.00 | C   |
| ATOM   | 925 | O CYS A 780   | 69.117 | 93.551 | 53.923 | 1.00 | 0.00 | O   |
| ATOM   | 926 | CB CYS A 780  | 69.975 | 95.780 | 56.077 | 1.00 | 0.00 | C   |
| ATOM   | 927 | SG CYS A 780  | 71.741 | 96.016 | 55.727 | 1.00 | 0.00 | S   |
| ATOM   | 928 | N ASP A 781   | 71.163 | 93.140 | 54.750 | 1.00 | 0.00 | N   |
| ATOM   | 929 | CA ASP A 781  | 71.591 | 92.529 | 53.524 | 1.00 | 0.00 | C   |
| ATOM   | 930 | C ASP A 781   | 70.758 | 91.319 | 53.259 | 1.00 | 0.00 | C   |
| ATOM   | 931 | O ASP A 781   | 70.266 | 91.123 | 52.146 | 1.00 | 0.00 | O   |
| ATOM   | 932 | CB ASP A 781  | 73.057 | 92.061 | 53.580 | 1.00 | 0.00 | C   |
| ATOM   | 933 | CG ASP A 781  | 73.460 | 91.517 | 52.214 | 1.00 | 0.00 | C   |
| ATOM   | 934 | OD1 ASP A 781 | 72.626 | 91.595 | 51.269 | 1.00 | 0.00 | O   |
| ATOM   | 935 | OD2 ASP A 781 | 74.607 | 91.010 | 52.097 | 1.00 | 0.00 | O   |
| HETATM | 936 | N GUI A 782   | 70.574 | 90.471 | 54.306 | 1.00 | 0.00 | N   |
| HETATM | 937 | CA GUI A 782  | 69.835 | 89.237 | 54.056 | 1.00 | 0.00 | C   |
| HETATM | 938 | C GUI A 782   | 68.399 | 89.530 | 53.693 | 1.00 | 0.00 | C   |
| HETATM | 939 | O GUI A 782   | 67.859 | 88.839 | 52.871 | 1.00 | 0.00 | O   |
| HETATM | 940 | CB GUI A 782  | 69.903 | 88.319 | 55.310 | 1.00 | 0.00 | C   |
| HETATM | 941 | CG GUI A 782  | 71.298 | 87.682 | 55.609 | 1.00 | 0.00 | C   |
| HETATM | 942 | CD GUI A 782  | 72.228 | 87.400 | 54.444 | 1.00 | 0.00 | C   |
| HETATM | 943 | OE1 GUI A 782 | 73.265 | 88.069 | 54.275 | 1.00 | 0.00 | O   |
| HETATM | 944 | OE2 GUI A 782 | 71.901 | 86.464 | 53.685 | 1.00 | 0.00 | OI- |
| ATOM   | 945 | N VAL A 783   | 67.816 | 90.547 | 54.339 | 1.00 | 0.00 | N   |
| ATOM   | 946 | CA VAL A 783  | 66.451 | 90.842 | 54.019 | 1.00 | 0.00 | C   |
| ATOM   | 947 | C VAL A 783   | 66.370 | 91.274 | 52.591 | 1.00 | 0.00 | C   |
| ATOM   | 948 | O VAL A 783   | 65.404 | 90.954 | 51.896 | 1.00 | 0.00 | O   |
| ATOM   | 949 | CB VAL A 783  | 65.800 | 91.850 | 54.927 | 1.00 | 0.00 | C   |
| ATOM   | 950 | CG1 VAL A 783 | 65.674 | 91.199 | 56.311 | 1.00 | 0.00 | C   |
| ATOM   | 951 | CG2 VAL A 783 | 66.613 | 93.152 | 54.956 | 1.00 | 0.00 | C   |
| ATOM   | 952 | N ARG A 784   | 67.382 | 92.013 | 52.102 | 1.00 | 0.00 | N   |
| ATOM   | 953 | CA ARG A 784  | 67.349 | 92.437 | 50.734 | 1.00 | 0.00 | C   |
| ATOM   | 954 | C ARG A 784   | 67.353 | 91.225 | 49.855 | 1.00 | 0.00 | C   |
| ATOM   | 955 | O ARG A 784   | 66.610 | 91.155 | 48.879 | 1.00 | 0.00 | O   |
| ATOM   | 956 | CB ARG A 784  | 68.552 | 93.298 | 50.320 | 1.00 | 0.00 | C   |
| ATOM   | 957 | CG ARG A 784  | 68.533 | 93.640 | 48.831 | 1.00 | 0.00 | C   |
| ATOM   | 958 | CD ARG A 784  | 67.335 | 94.498 | 48.422 | 1.00 | 0.00 | C   |
| ATOM   | 959 | NE ARG A 784  | 67.286 | 94.523 | 46.931 | 1.00 | 0.00 | N   |
| ATOM   | 960 | CZ ARG A 784  | 66.290 | 95.203 | 46.294 | 1.00 | 0.00 | C   |
| ATOM   | 961 | NH1 ARG A 784 | 65.377 | 95.908 | 47.020 | 1.00 | 0.00 | N   |

|        |      |               |        |        |        |      |      |   |
|--------|------|---------------|--------|--------|--------|------|------|---|
| ATOM   | 962  | NH2 ARG A 784 | 66.209 | 95.177 | 44.933 | 1.00 | 0.00 | N |
| HETATM | 963  | N GN1 A 785   | 68.188 | 90.230 | 50.199 | 1.00 | 0.00 | N |
| HETATM | 964  | CA GN1 A 785  | 68.313 | 89.022 | 49.432 | 1.00 | 0.00 | C |
| HETATM | 965  | C GN1 A 785   | 66.996 | 88.320 | 49.481 | 1.00 | 0.00 | C |
| HETATM | 966  | O GN1 A 785   | 66.543 | 87.738 | 48.497 | 1.00 | 0.00 | O |
| HETATM | 967  | CB GN1 A 785  | 69.375 | 88.076 | 50.026 | 1.00 | 0.00 | C |
| HETATM | 968  | CG GN1 A 785  | 69.531 | 86.750 | 49.283 | 1.00 | 0.00 | C |
| HETATM | 969  | CD GN1 A 785  | 70.836 | 86.118 | 49.748 | 1.00 | 0.00 | C |
| HETATM | 970  | NE2 GN1 A 785 | 71.953 | 86.439 | 49.042 | 1.00 | 0.00 | N |
| HETATM | 971  | OE1 GN1 A 785 | 70.863 | 85.359 | 50.717 | 1.00 | 0.00 | O |
| ATOM   | 972  | N TRP A 786   | 66.332 | 88.381 | 50.644 | 1.00 | 0.00 | N |
| ATOM   | 973  | CA TRP A 786  | 65.067 | 87.740 | 50.839 | 1.00 | 0.00 | C |
| ATOM   | 974  | C TRP A 786   | 64.127 | 88.331 | 49.840 | 1.00 | 0.00 | C |
| ATOM   | 975  | O TRP A 786   | 63.352 | 87.626 | 49.198 | 1.00 | 0.00 | O |
| ATOM   | 976  | CB TRP A 786  | 64.502 | 88.047 | 52.237 | 1.00 | 0.00 | C |
| ATOM   | 977  | CG TRP A 786  | 63.207 | 87.358 | 52.604 | 1.00 | 0.00 | C |
| ATOM   | 978  | CD1 TRP A 786 | 61.922 | 87.705 | 52.303 | 1.00 | 0.00 | C |
| ATOM   | 979  | CD2 TRP A 786 | 63.129 | 86.198 | 53.449 | 1.00 | 0.00 | C |
| ATOM   | 980  | CE2 TRP A 786 | 61.779 | 85.901 | 53.616 | 1.00 | 0.00 | C |
| ATOM   | 981  | CE3 TRP A 786 | 64.102 | 85.455 | 54.050 | 1.00 | 0.00 | C |
| ATOM   | 982  | NE1 TRP A 786 | 61.047 | 86.829 | 52.906 | 1.00 | 0.00 | N |
| ATOM   | 983  | CZ2 TRP A 786 | 61.380 | 84.850 | 54.392 | 1.00 | 0.00 | C |
| ATOM   | 984  | CZ3 TRP A 786 | 63.699 | 84.383 | 54.816 | 1.00 | 0.00 | C |
| ATOM   | 985  | CH2 TRP A 786 | 62.363 | 84.088 | 54.984 | 1.00 | 0.00 | C |
| ATOM   | 986  | N TYR A 787   | 64.187 | 89.665 | 49.684 | 1.00 | 0.00 | N |
| ATOM   | 987  | CA TYR A 787  | 63.310 | 90.366 | 48.795 | 1.00 | 0.00 | C |
| ATOM   | 988  | C TYR A 787   | 63.546 | 89.952 | 47.378 | 1.00 | 0.00 | C |
| ATOM   | 989  | O TYR A 787   | 62.593 | 89.766 | 46.622 | 1.00 | 0.00 | O |
| ATOM   | 990  | CB TYR A 787  | 63.483 | 91.894 | 48.855 | 1.00 | 0.00 | C |
| ATOM   | 991  | CG TYR A 787  | 62.616 | 92.468 | 47.785 | 1.00 | 0.00 | C |
| ATOM   | 992  | CD1 TYR A 787 | 61.255 | 92.571 | 47.962 | 1.00 | 0.00 | C |
| ATOM   | 993  | CD2 TYR A 787 | 63.169 | 92.910 | 46.605 | 1.00 | 0.00 | C |
| ATOM   | 994  | CE1 TYR A 787 | 60.459 | 93.101 | 46.971 | 1.00 | 0.00 | C |
| ATOM   | 995  | CE2 TYR A 787 | 62.378 | 93.441 | 45.611 | 1.00 | 0.00 | C |
| ATOM   | 996  | CZ TYR A 787  | 61.020 | 93.537 | 45.795 | 1.00 | 0.00 | C |
| ATOM   | 997  | OH TYR A 787  | 60.206 | 94.081 | 44.780 | 1.00 | 0.00 | O |
| ATOM   | 998  | N VAL A 788   | 64.817 | 89.786 | 46.969 | 1.00 | 0.00 | N |
| ATOM   | 999  | CA VAL A 788  | 65.078 | 89.554 | 45.579 | 1.00 | 0.00 | C |
| ATOM   | 1000 | C VAL A 788   | 64.390 | 88.311 | 45.099 | 1.00 | 0.00 | C |
| ATOM   | 1001 | O VAL A 788   | 63.739 | 88.340 | 44.058 | 1.00 | 0.00 | O |
| ATOM   | 1002 | CB VAL A 788  | 66.543 | 89.443 | 45.240 | 1.00 | 0.00 | C |
| ATOM   | 1003 | CG1 VAL A 788 | 67.236 | 90.747 | 45.670 | 1.00 | 0.00 | C |
| ATOM   | 1004 | CG2 VAL A 788 | 67.136 | 88.167 | 45.859 | 1.00 | 0.00 | C |
| ATOM   | 1005 | N ASN A 789   | 64.488 | 87.179 | 45.830 | 1.00 | 0.00 | N |

|      |      |     |           |        |        |        |      |      |   |
|------|------|-----|-----------|--------|--------|--------|------|------|---|
| ATOM | 1006 | CA  | ASN A 789 | 63.856 | 85.996 | 45.307 | 1.00 | 0.00 | C |
| ATOM | 1007 | C   | ASN A 789 | 62.786 | 85.565 | 46.254 | 1.00 | 0.00 | C |
| ATOM | 1008 | O   | ASN A 789 | 63.062 | 85.306 | 47.424 | 1.00 | 0.00 | O |
| ATOM | 1009 | CB  | ASN A 789 | 64.823 | 84.812 | 45.141 | 1.00 | 0.00 | C |
| ATOM | 1010 | CG  | ASN A 789 | 65.799 | 85.154 | 44.023 | 1.00 | 0.00 | C |
| ATOM | 1011 | ND2 | ASN A 789 | 67.117 | 84.942 | 44.282 | 1.00 | 0.00 | N |
| ATOM | 1012 | OD1 | ASN A 789 | 65.400 | 85.606 | 42.952 | 1.00 | 0.00 | O |
| ATOM | 1013 | N   | GLY A 790 | 61.519 | 85.527 | 45.790 | 1.00 | 0.00 | N |
| ATOM | 1014 | CA  | GLY A 790 | 60.493 | 85.093 | 46.690 | 1.00 | 0.00 | C |
| ATOM | 1015 | C   | GLY A 790 | 60.598 | 83.623 | 46.978 | 1.00 | 0.00 | C |
| ATOM | 1016 | O   | GLY A 790 | 60.762 | 83.229 | 48.130 | 1.00 | 0.00 | O |
| ATOM | 1017 | N   | VAL A 791 | 60.489 | 82.775 | 45.930 | 1.00 | 0.00 | N |
| ATOM | 1018 | CA  | VAL A 791 | 60.521 | 81.340 | 46.068 | 1.00 | 0.00 | C |
| ATOM | 1019 | C   | VAL A 791 | 61.908 | 80.810 | 46.224 | 1.00 | 0.00 | C |
| ATOM | 1020 | O   | VAL A 791 | 62.178 | 79.970 | 47.082 | 1.00 | 0.00 | O |
| ATOM | 1021 | CB  | VAL A 791 | 59.927 | 80.630 | 44.886 | 1.00 | 0.00 | C |
| ATOM | 1022 | CG1 | VAL A 791 | 60.124 | 79.115 | 45.080 | 1.00 | 0.00 | C |
| ATOM | 1023 | CG2 | VAL A 791 | 58.456 | 81.059 | 44.746 | 1.00 | 0.00 | C |
| ATOM | 1024 | N   | ASN A 792 | 62.829 | 81.321 | 45.389 | 1.00 | 0.00 | N |
| ATOM | 1025 | CA  | ASN A 792 | 64.152 | 80.788 | 45.289 | 1.00 | 0.00 | C |
| ATOM | 1026 | C   | ASN A 792 | 64.849 | 80.935 | 46.599 | 1.00 | 0.00 | C |
| ATOM | 1027 | O   | ASN A 792 | 65.620 | 80.070 | 47.005 | 1.00 | 0.00 | O |
| ATOM | 1028 | CB  | ASN A 792 | 65.003 | 81.492 | 44.217 | 1.00 | 0.00 | C |
| ATOM | 1029 | CG  | ASN A 792 | 66.206 | 80.607 | 43.924 | 1.00 | 0.00 | C |
| ATOM | 1030 | ND2 | ASN A 792 | 66.423 | 80.299 | 42.617 | 1.00 | 0.00 | N |
| ATOM | 1031 | OD1 | ASN A 792 | 66.926 | 80.188 | 44.829 | 1.00 | 0.00 | O |
| ATOM | 1032 | N   | TYR A 793 | 64.602 | 82.041 | 47.303 | 1.00 | 0.00 | N |
| ATOM | 1033 | CA  | TYR A 793 | 65.277 | 82.245 | 48.548 | 1.00 | 0.00 | C |
| ATOM | 1034 | C   | TYR A 793 | 64.866 | 81.142 | 49.478 | 1.00 | 0.00 | C |
| ATOM | 1035 | O   | TYR A 793 | 65.698 | 80.521 | 50.135 | 1.00 | 0.00 | O |
| ATOM | 1036 | CB  | TYR A 793 | 64.874 | 83.579 | 49.196 | 1.00 | 0.00 | C |
| ATOM | 1037 | CG  | TYR A 793 | 65.734 | 83.828 | 50.387 | 1.00 | 0.00 | C |
| ATOM | 1038 | CD1 | TYR A 793 | 66.973 | 84.404 | 50.236 | 1.00 | 0.00 | C |
| ATOM | 1039 | CD2 | TYR A 793 | 65.307 | 83.493 | 51.651 | 1.00 | 0.00 | C |
| ATOM | 1040 | CE1 | TYR A 793 | 67.779 | 84.645 | 51.325 | 1.00 | 0.00 | C |
| ATOM | 1041 | CE2 | TYR A 793 | 66.107 | 83.733 | 52.745 | 1.00 | 0.00 | C |
| ATOM | 1042 | CZ  | TYR A 793 | 67.345 | 84.310 | 52.583 | 1.00 | 0.00 | C |
| ATOM | 1043 | OH  | TYR A 793 | 68.167 | 84.562 | 53.701 | 1.00 | 0.00 | O |
| ATOM | 1044 | N   | PHE A 794 | 63.560 | 80.842 | 49.529 | 1.00 | 0.00 | N |
| ATOM | 1045 | CA  | PHE A 794 | 63.048 | 79.835 | 50.412 | 1.00 | 0.00 | C |
| ATOM | 1046 | C   | PHE A 794 | 63.539 | 78.484 | 50.013 | 1.00 | 0.00 | C |
| ATOM | 1047 | O   | PHE A 794 | 63.729 | 77.624 | 50.869 | 1.00 | 0.00 | O |
| ATOM | 1048 | CB  | PHE A 794 | 61.513 | 79.734 | 50.441 | 1.00 | 0.00 | C |
| ATOM | 1049 | CG  | PHE A 794 | 60.976 | 80.917 | 51.163 | 1.00 | 0.00 | C |

|        |      |               |        |        |        |      |      |   |
|--------|------|---------------|--------|--------|--------|------|------|---|
| ATOM   | 1050 | CD1 PHE A 794 | 61.112 | 81.021 | 52.527 | 1.00 | 0.00 | C |
| ATOM   | 1051 | CD2 PHE A 794 | 60.315 | 81.906 | 50.480 | 1.00 | 0.00 | C |
| ATOM   | 1052 | CE1 PHE A 794 | 60.609 | 82.113 | 53.194 | 1.00 | 0.00 | C |
| ATOM   | 1053 | CE2 PHE A 794 | 59.806 | 82.998 | 51.138 | 1.00 | 0.00 | C |
| ATOM   | 1054 | CZ PHE A 794  | 59.957 | 83.103 | 52.500 | 1.00 | 0.00 | C |
| ATOM   | 1055 | N THR A 795   | 63.739 | 78.244 | 48.705 | 1.00 | 0.00 | N |
| ATOM   | 1056 | CA THR A 795  | 64.058 | 76.913 | 48.287 | 1.00 | 0.00 | C |
| ATOM   | 1057 | C THR A 795   | 65.297 | 76.415 | 48.974 | 1.00 | 0.00 | C |
| ATOM   | 1058 | O THR A 795   | 65.298 | 75.303 | 49.499 | 1.00 | 0.00 | O |
| ATOM   | 1059 | CB THR A 795  | 64.231 | 76.773 | 46.799 | 1.00 | 0.00 | C |
| ATOM   | 1060 | CG2 THR A 795 | 65.534 | 77.428 | 46.331 | 1.00 | 0.00 | C |
| ATOM   | 1061 | OG1 THR A 795 | 64.266 | 75.403 | 46.464 | 1.00 | 0.00 | O |
| ATOM   | 1062 | N ASP A 796   | 66.384 | 77.211 | 49.013 | 1.00 | 0.00 | N |
| ATOM   | 1063 | CA ASP A 796  | 67.578 | 76.753 | 49.668 | 1.00 | 0.00 | C |
| ATOM   | 1064 | C ASP A 796   | 67.307 | 76.775 | 51.137 | 1.00 | 0.00 | C |
| ATOM   | 1065 | O ASP A 796   | 66.636 | 77.673 | 51.648 | 1.00 | 0.00 | O |
| ATOM   | 1066 | CB ASP A 796  | 68.791 | 77.664 | 49.373 | 1.00 | 0.00 | C |
| ATOM   | 1067 | CG ASP A 796  | 70.093 | 76.980 | 49.783 | 1.00 | 0.00 | C |
| ATOM   | 1068 | OD1 ASP A 796 | 70.114 | 76.285 | 50.832 | 1.00 | 0.00 | O |
| ATOM   | 1069 | OD2 ASP A 796 | 71.096 | 77.149 | 49.037 | 1.00 | 0.00 | O |
| ATOM   | 1070 | N LEU A 797   | 67.771 | 75.739 | 51.854 | 1.00 | 0.00 | N |
| ATOM   | 1071 | CA LEU A 797  | 67.610 | 75.651 | 53.275 | 1.00 | 0.00 | C |
| ATOM   | 1072 | C LEU A 797   | 68.507 | 76.629 | 53.970 | 1.00 | 0.00 | C |
| ATOM   | 1073 | O LEU A 797   | 68.117 | 77.265 | 54.946 | 1.00 | 0.00 | O |
| ATOM   | 1074 | CB LEU A 797  | 67.971 | 74.250 | 53.797 | 1.00 | 0.00 | C |
| ATOM   | 1075 | CG LEU A 797  | 67.066 | 73.141 | 53.228 | 1.00 | 0.00 | C |
| ATOM   | 1076 | CD1 LEU A 797 | 67.455 | 71.760 | 53.770 | 1.00 | 0.00 | C |
| ATOM   | 1077 | CD2 LEU A 797 | 65.581 | 73.470 | 53.451 | 1.00 | 0.00 | C |
| ATOM   | 1078 | N TRP A 798   | 69.746 | 76.775 | 53.479 | 1.00 | 0.00 | N |
| ATOM   | 1079 | CA TRP A 798  | 70.727 | 77.561 | 54.172 | 1.00 | 0.00 | C |
| ATOM   | 1080 | C TRP A 798   | 70.340 | 78.997 | 54.234 | 1.00 | 0.00 | C |
| ATOM   | 1081 | O TRP A 798   | 70.463 | 79.624 | 55.286 | 1.00 | 0.00 | O |
| ATOM   | 1082 | CB TRP A 798  | 72.122 | 77.430 | 53.541 | 1.00 | 0.00 | C |
| ATOM   | 1083 | CG TRP A 798  | 72.662 | 76.026 | 53.682 | 1.00 | 0.00 | C |
| ATOM   | 1084 | CD1 TRP A 798 | 72.696 | 75.009 | 52.772 | 1.00 | 0.00 | C |
| ATOM   | 1085 | CD2 TRP A 798 | 73.218 | 75.503 | 54.898 | 1.00 | 0.00 | C |
| ATOM   | 1086 | CE2 TRP A 798 | 73.563 | 74.173 | 54.656 | 1.00 | 0.00 | C |
| ATOM   | 1087 | CE3 TRP A 798 | 73.420 | 76.082 | 56.118 | 1.00 | 0.00 | C |
| ATOM   | 1088 | NE1 TRP A 798 | 73.239 | 73.883 | 53.347 | 1.00 | 0.00 | N |
| ATOM   | 1089 | CZ2 TRP A 798 | 74.116 | 73.398 | 55.637 | 1.00 | 0.00 | C |
| ATOM   | 1090 | CZ3 TRP A 798 | 73.983 | 75.300 | 57.103 | 1.00 | 0.00 | C |
| ATOM   | 1091 | CH2 TRP A 798 | 74.324 | 73.983 | 56.866 | 1.00 | 0.00 | C |
| HETATM | 1092 | N AN1 A 799   | 69.847 | 79.568 | 53.085 | 1.00 | 0.00 | N |
| HETATM | 1093 | CA AN1 A 799  | 69.596 | 80.997 | 53.251 | 1.00 | 0.00 | C |

|             |     |           |        |        |        |      |      |     |
|-------------|-----|-----------|--------|--------|--------|------|------|-----|
| HETATM 1094 | C   | ANI A 799 | 68.432 | 81.237 | 54.182 | 1.00 | 0.00 | C   |
| HETATM 1095 | O   | ANI A 799 | 68.450 | 82.266 | 54.846 | 1.00 | 0.00 | O   |
| HETATM 1096 | CB  | ANI A 799 | 69.332 | 81.642 | 51.860 | 1.00 | 0.00 | C   |
| HETATM 1097 | CG  | ANI A 799 | 70.550 | 81.876 | 50.959 | 1.00 | 0.00 | C   |
| HETATM 1098 | ND2 | ANI A 799 | 70.858 | 80.972 | 50.069 | 1.00 | 0.00 | N   |
| HETATM 1099 | OD1 | ANI A 799 | 71.228 | 82.888 | 51.033 | 1.00 | 0.00 | O   |
| ATOM 1100   | N   | VAL A 800 | 67.475 | 80.308 | 54.340 | 1.00 | 0.00 | N   |
| ATOM 1101   | CA  | VAL A 800 | 66.484 | 80.533 | 55.356 | 1.00 | 0.00 | C   |
| ATOM 1102   | C   | VAL A 800 | 67.121 | 80.358 | 56.705 | 1.00 | 0.00 | C   |
| ATOM 1103   | O   | VAL A 800 | 66.762 | 81.034 | 57.666 | 1.00 | 0.00 | O   |
| ATOM 1104   | CB  | VAL A 800 | 65.257 | 79.662 | 55.263 | 1.00 | 0.00 | C   |
| ATOM 1105   | CG1 | VAL A 800 | 64.584 | 79.918 | 53.905 | 1.00 | 0.00 | C   |
| ATOM 1106   | CG2 | VAL A 800 | 65.619 | 78.195 | 55.533 | 1.00 | 0.00 | C   |
| ATOM 1107   | N   | MET A 801 | 68.097 | 79.435 | 56.815 | 1.00 | 0.00 | N   |
| ATOM 1108   | CA  | MET A 801 | 68.730 | 79.155 | 58.074 | 1.00 | 0.00 | C   |
| ATOM 1109   | C   | MET A 801 | 69.415 | 80.381 | 58.585 | 1.00 | 0.00 | C   |
| ATOM 1110   | O   | MET A 801 | 69.372 | 80.665 | 59.781 | 1.00 | 0.00 | O   |
| ATOM 1111   | CB  | MET A 801 | 69.797 | 78.049 | 57.988 | 1.00 | 0.00 | C   |
| ATOM 1112   | CG  | MET A 801 | 70.608 | 77.899 | 59.278 | 1.00 | 0.00 | C   |
| ATOM 1113   | SD  | MET A 801 | 69.686 | 77.259 | 60.705 | 1.00 | 0.00 | S   |
| ATOM 1114   | CE  | MET A 801 | 69.721 | 75.535 | 60.143 | 1.00 | 0.00 | C   |
| HETATM 1115 | N   | API A 802 | 70.069 | 81.142 | 57.695 | 1.00 | 0.00 | N   |
| HETATM 1116 | CA  | API A 802 | 70.793 | 82.304 | 58.122 | 1.00 | 0.00 | C   |
| HETATM 1117 | C   | API A 802 | 69.838 | 83.289 | 58.726 | 1.00 | 0.00 | C   |
| HETATM 1118 | O   | API A 802 | 70.139 | 83.907 | 59.748 | 1.00 | 0.00 | O   |
| HETATM 1119 | CB  | API A 802 | 71.514 | 83.006 | 56.961 | 1.00 | 0.00 | C   |
| HETATM 1120 | CG  | API A 802 | 71.764 | 81.995 | 55.850 | 1.00 | 0.00 | C   |
| HETATM 1121 | OD1 | API A 802 | 72.122 | 80.829 | 56.165 | 1.00 | 0.00 | O1- |
| HETATM 1122 | OD2 | API A 802 | 71.605 | 82.380 | 54.662 | 1.00 | 0.00 | O   |
| ATOM 1123   | N   | THR A 803 | 68.655 | 83.467 | 58.111 | 1.00 | 0.00 | N   |
| ATOM 1124   | CA  | THR A 803 | 67.710 | 84.417 | 58.624 | 1.00 | 0.00 | C   |
| ATOM 1125   | C   | THR A 803 | 67.250 | 83.963 | 59.972 | 1.00 | 0.00 | C   |
| ATOM 1126   | O   | THR A 803 | 67.099 | 84.764 | 60.889 | 1.00 | 0.00 | O   |
| ATOM 1127   | CB  | THR A 803 | 66.488 | 84.592 | 57.763 | 1.00 | 0.00 | C   |
| ATOM 1128   | CG2 | THR A 803 | 66.931 | 84.980 | 56.344 | 1.00 | 0.00 | C   |
| ATOM 1129   | OG1 | THR A 803 | 65.729 | 83.392 | 57.727 | 1.00 | 0.00 | O   |
| ATOM 1130   | N   | LEU A 804 | 67.020 | 82.647 | 60.122 | 1.00 | 0.00 | N   |
| ATOM 1131   | CA  | LEU A 804 | 66.517 | 82.128 | 61.362 | 1.00 | 0.00 | C   |
| ATOM 1132   | C   | LEU A 804 | 67.540 | 82.412 | 62.418 | 1.00 | 0.00 | C   |
| ATOM 1133   | O   | LEU A 804 | 67.198 | 82.848 | 63.516 | 1.00 | 0.00 | O   |
| ATOM 1134   | CB  | LEU A 804 | 66.282 | 80.604 | 61.293 | 1.00 | 0.00 | C   |
| ATOM 1135   | CG  | LEU A 804 | 65.558 | 79.938 | 62.489 | 1.00 | 0.00 | C   |
| ATOM 1136   | CD1 | LEU A 804 | 65.411 | 78.425 | 62.245 | 1.00 | 0.00 | C   |
| ATOM 1137   | CD2 | LEU A 804 | 66.215 | 80.222 | 63.850 | 1.00 | 0.00 | C   |



|      |      |     |           |        |        |        |      |      |   |
|------|------|-----|-----------|--------|--------|--------|------|------|---|
| ATOM | 1138 | N   | GLY A 805 | 68.828 | 82.180 | 62.109 | 1.00 | 0.00 | N |
| ATOM | 1139 | CA  | GLY A 805 | 69.857 | 82.367 | 63.090 | 1.00 | 0.00 | C |
| ATOM | 1140 | C   | GLY A 805 | 69.926 | 83.807 | 63.490 | 1.00 | 0.00 | C |
| ATOM | 1141 | O   | GLY A 805 | 70.083 | 84.126 | 64.668 | 1.00 | 0.00 | O |
| ATOM | 1142 | N   | LEU A 806 | 69.824 | 84.720 | 62.507 | 1.00 | 0.00 | N |
| ATOM | 1143 | CA  | LEU A 806 | 69.934 | 86.127 | 62.769 | 1.00 | 0.00 | C |
| ATOM | 1144 | C   | LEU A 806 | 68.787 | 86.540 | 63.631 | 1.00 | 0.00 | C |
| ATOM | 1145 | O   | LEU A 806 | 68.945 | 87.338 | 64.551 | 1.00 | 0.00 | O |
| ATOM | 1146 | CB  | LEU A 806 | 69.879 | 86.965 | 61.474 | 1.00 | 0.00 | C |
| ATOM | 1147 | CG  | LEU A 806 | 70.186 | 88.471 | 61.634 | 1.00 | 0.00 | C |
| ATOM | 1148 | CD1 | LEU A 806 | 69.126 | 89.217 | 62.461 | 1.00 | 0.00 | C |
| ATOM | 1149 | CD2 | LEU A 806 | 71.617 | 88.684 | 62.152 | 1.00 | 0.00 | C |
| ATOM | 1150 | N   | PHE A 807 | 67.593 | 85.995 | 63.344 | 1.00 | 0.00 | N |
| ATOM | 1151 | CA  | PHE A 807 | 66.407 | 86.357 | 64.067 | 1.00 | 0.00 | C |
| ATOM | 1152 | C   | PHE A 807 | 66.563 | 85.937 | 65.496 | 1.00 | 0.00 | C |
| ATOM | 1153 | O   | PHE A 807 | 66.240 | 86.692 | 66.411 | 1.00 | 0.00 | O |
| ATOM | 1154 | CB  | PHE A 807 | 65.148 | 85.669 | 63.519 | 1.00 | 0.00 | C |
| ATOM | 1155 | CG  | PHE A 807 | 63.995 | 86.123 | 64.344 | 1.00 | 0.00 | C |
| ATOM | 1156 | CD1 | PHE A 807 | 63.409 | 87.346 | 64.106 | 1.00 | 0.00 | C |
| ATOM | 1157 | CD2 | PHE A 807 | 63.498 | 85.328 | 65.350 | 1.00 | 0.00 | C |
| ATOM | 1158 | CE1 | PHE A 807 | 62.344 | 87.768 | 64.867 | 1.00 | 0.00 | C |
| ATOM | 1159 | CE2 | PHE A 807 | 62.434 | 85.745 | 66.112 | 1.00 | 0.00 | C |
| ATOM | 1160 | CZ  | PHE A 807 | 61.857 | 86.967 | 65.872 | 1.00 | 0.00 | C |
| ATOM | 1161 | N   | TYR A 808 | 67.077 | 84.714 | 65.716 | 1.00 | 0.00 | N |
| ATOM | 1162 | CA  | TYR A 808 | 67.215 | 84.178 | 67.039 | 1.00 | 0.00 | C |
| ATOM | 1163 | C   | TYR A 808 | 68.177 | 85.039 | 67.795 | 1.00 | 0.00 | C |
| ATOM | 1164 | O   | TYR A 808 | 67.991 | 85.309 | 68.979 | 1.00 | 0.00 | O |
| ATOM | 1165 | CB  | TYR A 808 | 67.728 | 82.726 | 67.031 | 1.00 | 0.00 | C |
| ATOM | 1166 | CG  | TYR A 808 | 67.696 | 82.206 | 68.430 | 1.00 | 0.00 | C |
| ATOM | 1167 | CD1 | TYR A 808 | 66.493 | 81.965 | 69.052 | 1.00 | 0.00 | C |
| ATOM | 1168 | CD2 | TYR A 808 | 68.861 | 81.930 | 69.105 | 1.00 | 0.00 | C |
| ATOM | 1169 | CE1 | TYR A 808 | 66.449 | 81.481 | 70.338 | 1.00 | 0.00 | C |
| ATOM | 1170 | CE2 | TYR A 808 | 68.825 | 81.445 | 70.391 | 1.00 | 0.00 | C |
| ATOM | 1171 | CZ  | TYR A 808 | 67.618 | 81.220 | 71.010 | 1.00 | 0.00 | C |
| ATOM | 1172 | OH  | TYR A 808 | 67.583 | 80.723 | 72.329 | 1.00 | 0.00 | O |
| ATOM | 1173 | N   | PHE A 809 | 69.244 | 85.493 | 67.114 | 1.00 | 0.00 | N |
| ATOM | 1174 | CA  | PHE A 809 | 70.246 | 86.325 | 67.715 | 1.00 | 0.00 | C |
| ATOM | 1175 | C   | PHE A 809 | 69.595 | 87.606 | 68.131 | 1.00 | 0.00 | C |
| ATOM | 1176 | O   | PHE A 809 | 69.871 | 88.137 | 69.208 | 1.00 | 0.00 | O |
| ATOM | 1177 | CB  | PHE A 809 | 71.371 | 86.660 | 66.723 | 1.00 | 0.00 | C |
| ATOM | 1178 | CG  | PHE A 809 | 72.402 | 87.475 | 67.419 | 1.00 | 0.00 | C |
| ATOM | 1179 | CD1 | PHE A 809 | 73.357 | 86.863 | 68.191 | 1.00 | 0.00 | C |
| ATOM | 1180 | CD2 | PHE A 809 | 72.422 | 88.843 | 67.292 | 1.00 | 0.00 | C |
| ATOM | 1181 | CE1 | PHE A 809 | 74.317 | 87.607 | 68.833 | 1.00 | 0.00 | C |

|      |      |               |        |        |        |      |      |   |
|------|------|---------------|--------|--------|--------|------|------|---|
| ATOM | 1182 | CE2 PHE A 809 | 73.381 | 89.593 | 67.931 | 1.00 | 0.00 | C |
| ATOM | 1183 | CZ PHE A 809  | 74.331 | 88.975 | 68.707 | 1.00 | 0.00 | C |
| ATOM | 1184 | N ILE A 810   | 68.695 | 88.133 | 67.283 | 1.00 | 0.00 | N |
| ATOM | 1185 | CA ILE A 810  | 68.023 | 89.369 | 67.562 | 1.00 | 0.00 | C |
| ATOM | 1186 | C ILE A 810   | 67.254 | 89.169 | 68.825 | 1.00 | 0.00 | C |
| ATOM | 1187 | O ILE A 810   | 67.253 | 90.025 | 69.708 | 1.00 | 0.00 | O |
| ATOM | 1188 | CB ILE A 810  | 67.003 | 89.717 | 66.513 | 1.00 | 0.00 | C |
| ATOM | 1189 | CG1 ILE A 810 | 67.635 | 89.838 | 65.118 | 1.00 | 0.00 | C |
| ATOM | 1190 | CG2 ILE A 810 | 66.280 | 90.991 | 66.984 | 1.00 | 0.00 | C |
| ATOM | 1191 | CD1 ILE A 810 | 68.634 | 90.982 | 64.972 | 1.00 | 0.00 | C |
| ATOM | 1192 | N ALA A 811   | 66.577 | 88.013 | 68.939 | 1.00 | 0.00 | N |
| ATOM | 1193 | CA ALA A 811  | 65.769 | 87.734 | 70.088 | 1.00 | 0.00 | C |
| ATOM | 1194 | C ALA A 811   | 66.657 | 87.722 | 71.288 | 1.00 | 0.00 | C |
| ATOM | 1195 | O ALA A 811   | 66.313 | 88.267 | 72.336 | 1.00 | 0.00 | O |
| ATOM | 1196 | CB ALA A 811  | 65.082 | 86.362 | 70.010 | 1.00 | 0.00 | C |
| ATOM | 1197 | N GLY A 812   | 67.851 | 87.121 | 71.166 | 1.00 | 0.00 | N |
| ATOM | 1198 | CA GLY A 812  | 68.723 | 87.033 | 72.298 | 1.00 | 0.00 | C |
| ATOM | 1199 | C GLY A 812   | 69.074 | 88.415 | 72.737 | 1.00 | 0.00 | C |
| ATOM | 1200 | O GLY A 812   | 69.179 | 88.683 | 73.933 | 1.00 | 0.00 | O |
| ATOM | 1201 | N ILE A 813   | 69.284 | 89.328 | 71.774 | 1.00 | 0.00 | N |
| ATOM | 1202 | CA ILE A 813  | 69.668 | 90.670 | 72.098 | 1.00 | 0.00 | C |
| ATOM | 1203 | C ILE A 813   | 68.567 | 91.328 | 72.868 | 1.00 | 0.00 | C |
| ATOM | 1204 | O ILE A 813   | 68.818 | 91.989 | 73.874 | 1.00 | 0.00 | O |
| ATOM | 1205 | CB ILE A 813  | 69.950 | 91.505 | 70.886 | 1.00 | 0.00 | C |
| ATOM | 1206 | CG1 ILE A 813 | 71.118 | 90.902 | 70.085 | 1.00 | 0.00 | C |
| ATOM | 1207 | CG2 ILE A 813 | 70.206 | 92.950 | 71.349 | 1.00 | 0.00 | C |
| ATOM | 1208 | CD1 ILE A 813 | 71.289 | 91.520 | 68.699 | 1.00 | 0.00 | C |
| ATOM | 1209 | N VAL A 814   | 67.309 | 91.161 | 72.419 | 1.00 | 0.00 | N |
| ATOM | 1210 | CA VAL A 814  | 66.210 | 91.816 | 73.073 | 1.00 | 0.00 | C |
| ATOM | 1211 | C VAL A 814   | 66.057 | 91.276 | 74.464 | 1.00 | 0.00 | C |
| ATOM | 1212 | O VAL A 814   | 65.803 | 92.024 | 75.406 | 1.00 | 0.00 | O |
| ATOM | 1213 | CB VAL A 814  | 64.906 | 91.661 | 72.344 | 1.00 | 0.00 | C |
| ATOM | 1214 | CG1 VAL A 814 | 64.397 | 90.219 | 72.477 | 1.00 | 0.00 | C |
| ATOM | 1215 | CG2 VAL A 814 | 63.930 | 92.714 | 72.886 | 1.00 | 0.00 | C |
| ATOM | 1216 | N PHE A 815   | 66.223 | 89.951 | 74.618 | 1.00 | 0.00 | N |
| ATOM | 1217 | CA PHE A 815  | 66.081 | 89.241 | 75.860 | 1.00 | 0.00 | C |
| ATOM | 1218 | C PHE A 815   | 67.164 | 89.604 | 76.828 | 1.00 | 0.00 | C |
| ATOM | 1219 | O PHE A 815   | 66.952 | 89.521 | 78.036 | 1.00 | 0.00 | O |
| ATOM | 1220 | CB PHE A 815  | 66.095 | 87.707 | 75.714 | 1.00 | 0.00 | C |
| ATOM | 1221 | CG PHE A 815  | 64.755 | 87.265 | 75.238 | 1.00 | 0.00 | C |
| ATOM | 1222 | CD1 PHE A 815 | 63.706 | 87.173 | 76.127 | 1.00 | 0.00 | C |
| ATOM | 1223 | CD2 PHE A 815 | 64.537 | 86.917 | 73.925 | 1.00 | 0.00 | C |
| ATOM | 1224 | CE1 PHE A 815 | 62.463 | 86.762 | 75.706 | 1.00 | 0.00 | C |
| ATOM | 1225 | CE2 PHE A 815 | 63.298 | 86.506 | 73.496 | 1.00 | 0.00 | C |

|        |      |     |           |        |        |        |      |      |   |
|--------|------|-----|-----------|--------|--------|--------|------|------|---|
| ATOM   | 1226 | CZ  | PHE A 815 | 62.257 | 86.429 | 74.390 | 1.00 | 0.00 | C |
| ATOM   | 1227 | N   | ARG A 816 | 68.362 | 89.978 | 76.349 | 1.00 | 0.00 | N |
| ATOM   | 1228 | CA  | ARG A 816 | 69.434 | 90.190 | 77.283 | 1.00 | 0.00 | C |
| ATOM   | 1229 | C   | ARG A 816 | 69.073 | 91.244 | 78.286 | 1.00 | 0.00 | C |
| ATOM   | 1230 | O   | ARG A 816 | 69.326 | 91.074 | 79.475 | 1.00 | 0.00 | O |
| ATOM   | 1231 | CB  | ARG A 816 | 70.763 | 90.636 | 76.654 | 1.00 | 0.00 | C |
| ATOM   | 1232 | CG  | ARG A 816 | 71.845 | 90.803 | 77.727 | 1.00 | 0.00 | C |
| ATOM   | 1233 | CD  | ARG A 816 | 73.164 | 91.397 | 77.229 | 1.00 | 0.00 | C |
| ATOM   | 1234 | NE  | ARG A 816 | 73.754 | 90.438 | 76.258 | 1.00 | 0.00 | N |
| ATOM   | 1235 | CZ  | ARG A 816 | 75.107 | 90.427 | 76.072 | 1.00 | 0.00 | C |
| ATOM   | 1236 | NH1 | ARG A 816 | 75.901 | 91.236 | 76.830 | 1.00 | 0.00 | N |
| ATOM   | 1237 | NH2 | ARG A 816 | 75.662 | 89.612 | 75.129 | 1.00 | 0.00 | N |
| ATOM   | 1238 | N   | LEU A 817 | 68.465 | 92.355 | 77.835 | 1.00 | 0.00 | N |
| ATOM   | 1239 | CA  | LEU A 817 | 68.125 | 93.461 | 78.689 | 1.00 | 0.00 | C |
| ATOM   | 1240 | C   | LEU A 817 | 67.089 | 93.013 | 79.681 | 1.00 | 0.00 | C |
| ATOM   | 1241 | O   | LEU A 817 | 67.106 | 93.436 | 80.838 | 1.00 | 0.00 | O |
| ATOM   | 1242 | CB  | LEU A 817 | 67.579 | 94.658 | 77.874 | 1.00 | 0.00 | C |
| ATOM   | 1243 | CG  | LEU A 817 | 67.349 | 95.992 | 78.626 | 1.00 | 0.00 | C |
| ATOM   | 1244 | CD1 | LEU A 817 | 66.872 | 97.076 | 77.647 | 1.00 | 0.00 | C |
| ATOM   | 1245 | CD2 | LEU A 817 | 66.382 | 95.867 | 79.814 | 1.00 | 0.00 | C |
| HETATM | 1246 | N   | HIE A 818 | 66.185 | 92.107 | 79.267 | 1.00 | 0.00 | N |
| HETATM | 1247 | CA  | HIE A 818 | 65.045 | 91.731 | 80.062 | 1.00 | 0.00 | C |
| HETATM | 1248 | C   | HIE A 818 | 65.454 | 91.234 | 81.418 | 1.00 | 0.00 | C |
| HETATM | 1249 | O   | HIE A 818 | 64.880 | 91.661 | 82.422 | 1.00 | 0.00 | O |
| HETATM | 1250 | CB  | HIE A 818 | 64.197 | 90.631 | 79.406 | 1.00 | 0.00 | C |
| HETATM | 1251 | CG  | HIE A 818 | 62.927 | 90.369 | 80.155 | 1.00 | 0.00 | C |
| HETATM | 1252 | CD2 | HIE A 818 | 62.654 | 89.453 | 81.123 | 1.00 | 0.00 | C |
| HETATM | 1253 | ND1 | HIE A 818 | 61.761 | 91.081 | 79.972 | 1.00 | 0.00 | N |
| HETATM | 1254 | CE1 | HIE A 818 | 60.849 | 90.564 | 80.832 | 1.00 | 0.00 | C |
| HETATM | 1255 | NE2 | HIE A 818 | 61.345 | 89.576 | 81.554 | 1.00 | 0.00 | N |
| ATOM   | 1256 | N   | SER A 819 | 66.483 | 90.368 | 81.503 | 1.00 | 0.00 | N |
| ATOM   | 1257 | CA  | SER A 819 | 66.923 | 89.844 | 82.767 | 1.00 | 0.00 | C |
| ATOM   | 1258 | C   | SER A 819 | 65.788 | 89.277 | 83.571 | 1.00 | 0.00 | C |
| ATOM   | 1259 | O   | SER A 819 | 65.173 | 89.978 | 84.373 | 1.00 | 0.00 | O |
| ATOM   | 1260 | CB  | SER A 819 | 67.638 | 90.903 | 83.620 | 1.00 | 0.00 | C |
| ATOM   | 1261 | OG  | SER A 819 | 68.052 | 90.340 | 84.853 | 1.00 | 0.00 | O |
| ATOM   | 1262 | N   | SER A 820 | 65.450 | 87.989 | 83.336 | 1.00 | 0.00 | N |
| ATOM   | 1263 | CA  | SER A 820 | 64.395 | 87.367 | 84.090 | 1.00 | 0.00 | C |
| ATOM   | 1264 | C   | SER A 820 | 64.725 | 85.913 | 84.261 | 1.00 | 0.00 | C |
| ATOM   | 1265 | O   | SER A 820 | 65.756 | 85.436 | 83.795 | 1.00 | 0.00 | O |
| ATOM   | 1266 | CB  | SER A 820 | 63.028 | 87.468 | 83.390 | 1.00 | 0.00 | C |
| ATOM   | 1267 | OG  | SER A 820 | 62.006 | 86.888 | 84.188 | 1.00 | 0.00 | O |
| ATOM   | 1268 | N   | ASN A 821 | 63.868 | 85.173 | 84.998 | 1.00 | 0.00 | N |
| ATOM   | 1269 | CA  | ASN A 821 | 64.083 | 83.767 | 85.163 | 1.00 | 0.00 | C |

|      |      |     |           |        |        |        |      |      |     |
|------|------|-----|-----------|--------|--------|--------|------|------|-----|
| ATOM | 1270 | C   | ASN A 821 | 63.568 | 83.079 | 83.945 | 1.00 | 0.00 | C   |
| ATOM | 1271 | O   | ASN A 821 | 62.706 | 83.597 | 83.237 | 1.00 | 0.00 | O   |
| ATOM | 1272 | CB  | ASN A 821 | 63.386 | 83.154 | 86.388 | 1.00 | 0.00 | C   |
| ATOM | 1273 | CG  | ASN A 821 | 64.215 | 83.514 | 87.609 | 1.00 | 0.00 | C   |
| ATOM | 1274 | ND2 | ASN A 821 | 63.538 | 83.996 | 88.687 | 1.00 | 0.00 | N   |
| ATOM | 1275 | OD1 | ASN A 821 | 65.435 | 83.369 | 87.607 | 1.00 | 0.00 | O   |
| ATOM | 1276 | N   | LYS A 822 | 64.133 | 81.892 | 83.659 | 1.00 | 0.00 | N   |
| ATOM | 1277 | CA  | LYS A 822 | 63.779 | 81.088 | 82.520 | 1.00 | 0.00 | C   |
| ATOM | 1278 | C   | LYS A 822 | 64.295 | 81.767 | 81.288 | 1.00 | 0.00 | C   |
| ATOM | 1279 | O   | LYS A 822 | 64.169 | 81.254 | 80.177 | 1.00 | 0.00 | O   |
| ATOM | 1280 | CB  | LYS A 822 | 62.259 | 80.894 | 82.397 | 1.00 | 0.00 | C   |
| ATOM | 1281 | CG  | LYS A 822 | 61.676 | 80.133 | 83.590 | 1.00 | 0.00 | C   |
| ATOM | 1282 | CD  | LYS A 822 | 60.155 | 80.218 | 83.711 | 1.00 | 0.00 | C   |
| ATOM | 1283 | CE  | LYS A 822 | 59.619 | 79.617 | 85.013 | 1.00 | 0.00 | C   |
| ATOM | 1284 | NZ  | LYS A 822 | 60.008 | 80.471 | 86.158 | 1.00 | 0.00 | N1+ |
| ATOM | 1285 | N   | SER A 823 | 64.919 | 82.944 | 81.479 | 1.00 | 0.00 | N   |
| ATOM | 1286 | CA  | SER A 823 | 65.581 | 83.678 | 80.445 | 1.00 | 0.00 | C   |
| ATOM | 1287 | C   | SER A 823 | 66.295 | 84.756 | 81.191 | 1.00 | 0.00 | C   |
| ATOM | 1288 | O   | SER A 823 | 65.796 | 85.874 | 81.300 | 1.00 | 0.00 | O   |
| ATOM | 1289 | CB  | SER A 823 | 64.616 | 84.360 | 79.461 | 1.00 | 0.00 | C   |
| ATOM | 1290 | OG  | SER A 823 | 65.349 | 85.069 | 78.474 | 1.00 | 0.00 | O   |
| ATOM | 1291 | N   | SER A 824 | 67.486 | 84.429 | 81.725 | 1.00 | 0.00 | N   |
| ATOM | 1292 | CA  | SER A 824 | 68.233 | 85.347 | 82.533 | 1.00 | 0.00 | C   |
| ATOM | 1293 | C   | SER A 824 | 69.385 | 85.834 | 81.738 | 1.00 | 0.00 | C   |
| ATOM | 1294 | O   | SER A 824 | 69.448 | 85.661 | 80.520 | 1.00 | 0.00 | O   |
| ATOM | 1295 | CB  | SER A 824 | 68.857 | 84.706 | 83.785 | 1.00 | 0.00 | C   |
| ATOM | 1296 | OG  | SER A 824 | 67.852 | 84.207 | 84.654 | 1.00 | 0.00 | O   |
| ATOM | 1297 | N   | LEU A 825 | 70.339 | 86.476 | 82.434 | 1.00 | 0.00 | N   |
| ATOM | 1298 | CA  | LEU A 825 | 71.515 | 86.883 | 81.746 | 1.00 | 0.00 | C   |
| ATOM | 1299 | C   | LEU A 825 | 72.139 | 85.623 | 81.264 | 1.00 | 0.00 | C   |
| ATOM | 1300 | O   | LEU A 825 | 72.716 | 85.575 | 80.180 | 1.00 | 0.00 | O   |
| ATOM | 1301 | CB  | LEU A 825 | 72.561 | 87.623 | 82.590 | 1.00 | 0.00 | C   |
| ATOM | 1302 | CG  | LEU A 825 | 73.860 | 87.820 | 81.786 | 1.00 | 0.00 | C   |
| ATOM | 1303 | CD1 | LEU A 825 | 73.589 | 88.524 | 80.452 | 1.00 | 0.00 | C   |
| ATOM | 1304 | CD2 | LEU A 825 | 74.944 | 88.528 | 82.601 | 1.00 | 0.00 | C   |
| ATOM | 1305 | N   | TYR A 826 | 72.027 | 84.561 | 82.076 | 1.00 | 0.00 | N   |
| ATOM | 1306 | CA  | TYR A 826 | 72.590 | 83.308 | 81.686 | 1.00 | 0.00 | C   |
| ATOM | 1307 | C   | TYR A 826 | 71.878 | 82.877 | 80.443 | 1.00 | 0.00 | C   |
| ATOM | 1308 | O   | TYR A 826 | 72.503 | 82.404 | 79.496 | 1.00 | 0.00 | O   |
| ATOM | 1309 | CB  | TYR A 826 | 72.411 | 82.207 | 82.739 | 1.00 | 0.00 | C   |
| ATOM | 1310 | CG  | TYR A 826 | 73.153 | 81.020 | 82.229 | 1.00 | 0.00 | C   |
| ATOM | 1311 | CD1 | TYR A 826 | 74.514 | 80.934 | 82.408 | 1.00 | 0.00 | C   |
| ATOM | 1312 | CD2 | TYR A 826 | 72.497 | 80.003 | 81.576 | 1.00 | 0.00 | C   |
| ATOM | 1313 | CE1 | TYR A 826 | 75.215 | 79.847 | 81.944 | 1.00 | 0.00 | C   |

|      |      |               |        |        |        |      |      |   |
|------|------|---------------|--------|--------|--------|------|------|---|
| ATOM | 1314 | CE2 TYR A 826 | 73.193 | 78.914 | 81.108 | 1.00 | 0.00 | C |
| ATOM | 1315 | CZ TYR A 826  | 74.553 | 78.836 | 81.293 | 1.00 | 0.00 | C |
| ATOM | 1316 | OH TYR A 826  | 75.273 | 77.722 | 80.810 | 1.00 | 0.00 | O |
| ATOM | 1317 | N SER A 827   | 70.544 | 83.045 | 80.414 | 1.00 | 0.00 | N |
| ATOM | 1318 | CA SER A 827  | 69.786 | 82.631 | 79.268 | 1.00 | 0.00 | C |
| ATOM | 1319 | C SER A 827   | 70.239 | 83.429 | 78.092 | 1.00 | 0.00 | C |
| ATOM | 1320 | O SER A 827   | 70.393 | 82.899 | 76.992 | 1.00 | 0.00 | O |
| ATOM | 1321 | CB SER A 827  | 68.276 | 82.866 | 79.425 | 1.00 | 0.00 | C |
| ATOM | 1322 | OG SER A 827  | 67.594 | 82.435 | 78.257 | 1.00 | 0.00 | O |
| ATOM | 1323 | N GLY A 828   | 70.480 | 84.737 | 78.294 | 1.00 | 0.00 | N |
| ATOM | 1324 | CA GLY A 828  | 70.883 | 85.575 | 77.206 | 1.00 | 0.00 | C |
| ATOM | 1325 | C GLY A 828   | 72.186 | 85.071 | 76.690 | 1.00 | 0.00 | C |
| ATOM | 1326 | O GLY A 828   | 72.415 | 85.033 | 75.483 | 1.00 | 0.00 | O |
| ATOM | 1327 | N ARG A 829   | 73.087 | 84.677 | 77.605 | 1.00 | 0.00 | N |
| ATOM | 1328 | CA ARG A 829  | 74.367 | 84.198 | 77.174 | 1.00 | 0.00 | C |
| ATOM | 1329 | C ARG A 829   | 74.176 | 82.939 | 76.398 | 1.00 | 0.00 | C |
| ATOM | 1330 | O ARG A 829   | 74.873 | 82.699 | 75.417 | 1.00 | 0.00 | O |
| ATOM | 1331 | CB ARG A 829  | 75.355 | 83.912 | 78.316 | 1.00 | 0.00 | C |
| ATOM | 1332 | CG ARG A 829  | 76.008 | 85.187 | 78.854 | 1.00 | 0.00 | C |
| ATOM | 1333 | CD ARG A 829  | 77.307 | 84.932 | 79.621 | 1.00 | 0.00 | C |
| ATOM | 1334 | NE ARG A 829  | 76.955 | 84.289 | 80.915 | 1.00 | 0.00 | N |
| ATOM | 1335 | CZ ARG A 829  | 76.832 | 85.058 | 82.038 | 1.00 | 0.00 | C |
| ATOM | 1336 | NH1 ARG A 829 | 77.061 | 86.402 | 81.972 | 1.00 | 0.00 | N |
| ATOM | 1337 | NH2 ARG A 829 | 76.482 | 84.479 | 83.221 | 1.00 | 0.00 | N |
| ATOM | 1338 | N VAL A 830   | 73.213 | 82.098 | 76.817 | 1.00 | 0.00 | N |
| ATOM | 1339 | CA VAL A 830  | 73.012 | 80.838 | 76.159 | 1.00 | 0.00 | C |
| ATOM | 1340 | C VAL A 830   | 72.648 | 81.073 | 74.725 | 1.00 | 0.00 | C |
| ATOM | 1341 | O VAL A 830   | 73.195 | 80.445 | 73.822 | 1.00 | 0.00 | O |
| ATOM | 1342 | CB VAL A 830  | 71.898 | 80.042 | 76.770 | 1.00 | 0.00 | C |
| ATOM | 1343 | CG1 VAL A 830 | 71.687 | 78.770 | 75.931 | 1.00 | 0.00 | C |
| ATOM | 1344 | CG2 VAL A 830 | 72.243 | 79.770 | 78.246 | 1.00 | 0.00 | C |
| ATOM | 1345 | N ILE A 831   | 71.728 | 82.015 | 74.481 | 1.00 | 0.00 | N |
| ATOM | 1346 | CA ILE A 831  | 71.228 | 82.304 | 73.170 | 1.00 | 0.00 | C |
| ATOM | 1347 | C ILE A 831   | 72.362 | 82.786 | 72.331 | 1.00 | 0.00 | C |
| ATOM | 1348 | O ILE A 831   | 72.497 | 82.423 | 71.163 | 1.00 | 0.00 | O |
| ATOM | 1349 | CB ILE A 831  | 70.278 | 83.451 | 73.238 | 1.00 | 0.00 | C |
| ATOM | 1350 | CG1 ILE A 831 | 69.137 | 83.125 | 74.203 | 1.00 | 0.00 | C |
| ATOM | 1351 | CG2 ILE A 831 | 69.830 | 83.814 | 71.819 | 1.00 | 0.00 | C |
| ATOM | 1352 | CD1 ILE A 831 | 68.444 | 84.380 | 74.715 | 1.00 | 0.00 | C |
| ATOM | 1353 | N PHE A 832   | 73.202 | 83.639 | 72.932 | 1.00 | 0.00 | N |
| ATOM | 1354 | CA PHE A 832  | 74.273 | 84.300 | 72.251 | 1.00 | 0.00 | C |
| ATOM | 1355 | C PHE A 832   | 75.224 | 83.249 | 71.759 | 1.00 | 0.00 | C |
| ATOM | 1356 | O PHE A 832   | 75.701 | 83.314 | 70.628 | 1.00 | 0.00 | O |
| ATOM | 1357 | CB PHE A 832  | 75.001 | 85.248 | 73.223 | 1.00 | 0.00 | C |

|      |      |               |        |        |        |      |      |   |
|------|------|---------------|--------|--------|--------|------|------|---|
| ATOM | 1358 | CG PHE A 832  | 75.629 | 86.390 | 72.496 | 1.00 | 0.00 | C |
| ATOM | 1359 | CD1 PHE A 832 | 74.850 | 87.442 | 72.076 | 1.00 | 0.00 | C |
| ATOM | 1360 | CD2 PHE A 832 | 76.979 | 86.441 | 72.265 | 1.00 | 0.00 | C |
| ATOM | 1361 | CE1 PHE A 832 | 75.405 | 88.512 | 71.419 | 1.00 | 0.00 | C |
| ATOM | 1362 | CE2 PHE A 832 | 77.546 | 87.508 | 71.607 | 1.00 | 0.00 | C |
| ATOM | 1363 | CZ PHE A 832  | 76.758 | 88.548 | 71.178 | 1.00 | 0.00 | C |
| ATOM | 1364 | N CYS A 833   | 75.523 | 82.246 | 72.607 | 1.00 | 0.00 | N |
| ATOM | 1365 | CA CYS A 833  | 76.436 | 81.196 | 72.251 | 1.00 | 0.00 | C |
| ATOM | 1366 | C CYS A 833   | 75.881 | 80.403 | 71.111 | 1.00 | 0.00 | C |
| ATOM | 1367 | O CYS A 833   | 76.599 | 80.074 | 70.168 | 1.00 | 0.00 | O |
| ATOM | 1368 | CB CYS A 833  | 76.683 | 80.210 | 73.408 | 1.00 | 0.00 | C |
| ATOM | 1369 | SG CYS A 833  | 77.840 | 78.880 | 72.957 | 1.00 | 0.00 | S |
| ATOM | 1370 | N LEU A 834   | 74.573 | 80.086 | 71.162 | 1.00 | 0.00 | N |
| ATOM | 1371 | CA LEU A 834  | 73.957 | 79.271 | 70.152 | 1.00 | 0.00 | C |
| ATOM | 1372 | C LEU A 834   | 74.024 | 79.991 | 68.847 | 1.00 | 0.00 | C |
| ATOM | 1373 | O LEU A 834   | 74.292 | 79.386 | 67.811 | 1.00 | 0.00 | O |
| ATOM | 1374 | CB LEU A 834  | 72.475 | 78.976 | 70.447 | 1.00 | 0.00 | C |
| ATOM | 1375 | CG LEU A 834  | 72.271 | 78.134 | 71.720 | 1.00 | 0.00 | C |
| ATOM | 1376 | CD1 LEU A 834 | 70.784 | 77.835 | 71.962 | 1.00 | 0.00 | C |
| ATOM | 1377 | CD2 LEU A 834 | 73.141 | 76.867 | 71.698 | 1.00 | 0.00 | C |
| ATOM | 1378 | N ASP A 835   | 73.800 | 81.315 | 68.871 | 1.00 | 0.00 | N |
| ATOM | 1379 | CA ASP A 835  | 73.811 | 82.083 | 67.664 | 1.00 | 0.00 | C |
| ATOM | 1380 | C ASP A 835   | 75.177 | 81.960 | 67.082 | 1.00 | 0.00 | C |
| ATOM | 1381 | O ASP A 835   | 75.337 | 81.827 | 65.872 | 1.00 | 0.00 | O |
| ATOM | 1382 | CB ASP A 835  | 73.546 | 83.575 | 67.921 | 1.00 | 0.00 | C |
| ATOM | 1383 | CG ASP A 835  | 72.111 | 83.716 | 68.411 | 1.00 | 0.00 | C |
| ATOM | 1384 | OD1 ASP A 835 | 71.253 | 82.907 | 67.971 | 1.00 | 0.00 | O |
| ATOM | 1385 | OD2 ASP A 835 | 71.857 | 84.630 | 69.240 | 1.00 | 0.00 | O |
| ATOM | 1386 | N TYR A 836   | 76.199 | 81.955 | 67.950 | 1.00 | 0.00 | N |
| ATOM | 1387 | CA TYR A 836  | 77.565 | 81.871 | 67.523 | 1.00 | 0.00 | C |
| ATOM | 1388 | C TYR A 836   | 77.736 | 80.607 | 66.749 | 1.00 | 0.00 | C |
| ATOM | 1389 | O TYR A 836   | 78.376 | 80.598 | 65.699 | 1.00 | 0.00 | O |
| ATOM | 1390 | CB TYR A 836  | 78.541 | 81.817 | 68.712 | 1.00 | 0.00 | C |
| ATOM | 1391 | CG TYR A 836  | 79.892 | 81.422 | 68.213 | 1.00 | 0.00 | C |
| ATOM | 1392 | CD1 TYR A 836 | 80.770 | 82.354 | 67.715 | 1.00 | 0.00 | C |
| ATOM | 1393 | CD2 TYR A 836 | 80.275 | 80.102 | 68.256 | 1.00 | 0.00 | C |
| ATOM | 1394 | CE1 TYR A 836 | 82.010 | 81.966 | 67.262 | 1.00 | 0.00 | C |
| ATOM | 1395 | CE2 TYR A 836 | 81.512 | 79.709 | 67.802 | 1.00 | 0.00 | C |
| ATOM | 1396 | CZ TYR A 836  | 82.384 | 80.646 | 67.304 | 1.00 | 0.00 | C |
| ATOM | 1397 | OH TYR A 836  | 83.657 | 80.252 | 66.840 | 1.00 | 0.00 | O |
| ATOM | 1398 | N ILE A 837   | 77.155 | 79.501 | 67.245 | 1.00 | 0.00 | N |
| ATOM | 1399 | CA ILE A 837  | 77.334 | 78.232 | 66.605 | 1.00 | 0.00 | C |
| ATOM | 1400 | C ILE A 837   | 76.759 | 78.281 | 65.223 | 1.00 | 0.00 | C |
| ATOM | 1401 | O ILE A 837   | 77.394 | 77.840 | 64.269 | 1.00 | 0.00 | O |

|           |               |        |        |        |      |      |   |
|-----------|---------------|--------|--------|--------|------|------|---|
| ATOM 1402 | CB ILE A 837  | 76.645 | 77.116 | 67.331 | 1.00 | 0.00 | C |
| ATOM 1403 | CG1 ILE A 837 | 77.200 | 76.979 | 68.757 | 1.00 | 0.00 | C |
| ATOM 1404 | CG2 ILE A 837 | 76.806 | 75.844 | 66.485 | 1.00 | 0.00 | C |
| ATOM 1405 | CD1 ILE A 837 | 76.354 | 76.073 | 69.652 | 1.00 | 0.00 | C |
| ATOM 1406 | N ILE A 838   | 75.543 | 78.838 | 65.077 | 1.00 | 0.00 | N |
| ATOM 1407 | CA ILE A 838  | 74.901 | 78.845 | 63.793 | 1.00 | 0.00 | C |
| ATOM 1408 | C ILE A 838   | 75.688 | 79.675 | 62.833 | 1.00 | 0.00 | C |
| ATOM 1409 | O ILE A 838   | 75.816 | 79.312 | 61.665 | 1.00 | 0.00 | O |
| ATOM 1410 | CB ILE A 838  | 73.485 | 79.353 | 63.809 | 1.00 | 0.00 | C |
| ATOM 1411 | CG1 ILE A 838 | 72.779 | 78.969 | 62.497 | 1.00 | 0.00 | C |
| ATOM 1412 | CG2 ILE A 838 | 73.514 | 80.869 | 64.064 | 1.00 | 0.00 | C |
| ATOM 1413 | CD1 ILE A 838 | 72.589 | 77.460 | 62.329 | 1.00 | 0.00 | C |
| ATOM 1414 | N PHE A 839   | 76.236 | 80.818 | 63.290 | 1.00 | 0.00 | N |
| ATOM 1415 | CA PHE A 839  | 76.965 | 81.661 | 62.388 | 1.00 | 0.00 | C |
| ATOM 1416 | C PHE A 839   | 78.120 | 80.885 | 61.860 | 1.00 | 0.00 | C |
| ATOM 1417 | O PHE A 839   | 78.423 | 80.932 | 60.670 | 1.00 | 0.00 | O |
| ATOM 1418 | CB PHE A 839  | 77.505 | 82.960 | 63.017 | 1.00 | 0.00 | C |
| ATOM 1419 | CG PHE A 839  | 76.341 | 83.852 | 63.285 | 1.00 | 0.00 | C |
| ATOM 1420 | CD1 PHE A 839 | 75.642 | 84.419 | 62.241 | 1.00 | 0.00 | C |
| ATOM 1421 | CD2 PHE A 839 | 75.961 | 84.149 | 64.569 | 1.00 | 0.00 | C |
| ATOM 1422 | CE1 PHE A 839 | 74.569 | 85.245 | 62.478 | 1.00 | 0.00 | C |
| ATOM 1423 | CE2 PHE A 839 | 74.887 | 84.974 | 64.817 | 1.00 | 0.00 | C |
| ATOM 1424 | CZ PHE A 839  | 74.187 | 85.521 | 63.768 | 1.00 | 0.00 | C |
| ATOM 1425 | N THR A 840   | 78.784 | 80.120 | 62.737 | 1.00 | 0.00 | N |
| ATOM 1426 | CA THR A 840  | 79.938 | 79.367 | 62.358 | 1.00 | 0.00 | C |
| ATOM 1427 | C THR A 840   | 79.506 | 78.390 | 61.308 | 1.00 | 0.00 | C |
| ATOM 1428 | O THR A 840   | 80.211 | 78.162 | 60.327 | 1.00 | 0.00 | O |
| ATOM 1429 | CB THR A 840  | 80.466 | 78.585 | 63.518 | 1.00 | 0.00 | C |
| ATOM 1430 | CG2 THR A 840 | 81.832 | 78.005 | 63.135 | 1.00 | 0.00 | C |
| ATOM 1431 | OG1 THR A 840 | 80.638 | 79.450 | 64.628 | 1.00 | 0.00 | O |
| ATOM 1432 | N LEU A 841   | 78.305 | 77.809 | 61.484 | 1.00 | 0.00 | N |
| ATOM 1433 | CA LEU A 841  | 77.812 | 76.808 | 60.583 | 1.00 | 0.00 | C |
| ATOM 1434 | C LEU A 841   | 77.701 | 77.427 | 59.228 | 1.00 | 0.00 | C |
| ATOM 1435 | O LEU A 841   | 78.007 | 76.797 | 58.217 | 1.00 | 0.00 | O |
| ATOM 1436 | CB LEU A 841  | 76.422 | 76.286 | 60.979 | 1.00 | 0.00 | C |
| ATOM 1437 | CG LEU A 841  | 75.881 | 75.210 | 60.022 | 1.00 | 0.00 | C |
| ATOM 1438 | CD1 LEU A 841 | 76.748 | 73.941 | 60.073 | 1.00 | 0.00 | C |
| ATOM 1439 | CD2 LEU A 841 | 74.395 | 74.923 | 60.283 | 1.00 | 0.00 | C |
| ATOM 1440 | N ARG A 842   | 77.262 | 78.691 | 59.184 | 1.00 | 0.00 | N |
| ATOM 1441 | CA ARG A 842  | 77.096 | 79.433 | 57.970 | 1.00 | 0.00 | C |
| ATOM 1442 | C ARG A 842   | 78.430 | 79.507 | 57.295 | 1.00 | 0.00 | C |
| ATOM 1443 | O ARG A 842   | 78.546 | 79.283 | 56.091 | 1.00 | 0.00 | O |
| ATOM 1444 | CB ARG A 842  | 76.630 | 80.853 | 58.323 | 1.00 | 0.00 | C |
| ATOM 1445 | CG ARG A 842  | 76.577 | 81.890 | 57.206 | 1.00 | 0.00 | C |

|        |      |     |     |   |     |        |        |        |      |      |   |
|--------|------|-----|-----|---|-----|--------|--------|--------|------|------|---|
| ATOM   | 1446 | CD  | ARG | A | 842 | 76.095 | 83.225 | 57.780 | 1.00 | 0.00 | C |
| ATOM   | 1447 | NE  | ARG | A | 842 | 76.223 | 84.285 | 56.748 | 1.00 | 0.00 | N |
| ATOM   | 1448 | CZ  | ARG | A | 842 | 75.732 | 85.528 | 57.021 | 1.00 | 0.00 | C |
| ATOM   | 1449 | NH1 | ARG | A | 842 | 75.062 | 85.755 | 58.192 | 1.00 | 0.00 | N |
| ATOM   | 1450 | NH2 | ARG | A | 842 | 75.907 | 86.546 | 56.132 | 1.00 | 0.00 | N |
| ATOM   | 1451 | N   | LEU | A | 843 | 79.491 | 79.801 | 58.069 | 1.00 | 0.00 | N |
| ATOM   | 1452 | CA  | LEU | A | 843 | 80.795 | 79.903 | 57.486 | 1.00 | 0.00 | C |
| ATOM   | 1453 | C   | LEU | A | 843 | 81.185 | 78.582 | 56.924 | 1.00 | 0.00 | C |
| ATOM   | 1454 | O   | LEU | A | 843 | 81.742 | 78.507 | 55.833 | 1.00 | 0.00 | O |
| ATOM   | 1455 | CB  | LEU | A | 843 | 81.897 | 80.318 | 58.474 | 1.00 | 0.00 | C |
| ATOM   | 1456 | CG  | LEU | A | 843 | 81.871 | 81.814 | 58.842 | 1.00 | 0.00 | C |
| ATOM   | 1457 | CD1 | LEU | A | 843 | 80.556 | 82.205 | 59.523 | 1.00 | 0.00 | C |
| ATOM   | 1458 | CD2 | LEU | A | 843 | 83.113 | 82.205 | 59.659 | 1.00 | 0.00 | C |
| ATOM   | 1459 | N   | ILE | A | 844 | 80.867 | 77.492 | 57.643 | 1.00 | 0.00 | N |
| ATOM   | 1460 | CA  | ILE | A | 844 | 81.280 | 76.192 | 57.215 | 1.00 | 0.00 | C |
| ATOM   | 1461 | C   | ILE | A | 844 | 80.699 | 75.947 | 55.862 | 1.00 | 0.00 | C |
| ATOM   | 1462 | O   | ILE | A | 844 | 81.383 | 75.461 | 54.963 | 1.00 | 0.00 | O |
| ATOM   | 1463 | CB  | ILE | A | 844 | 80.769 | 75.121 | 58.130 | 1.00 | 0.00 | C |
| ATOM   | 1464 | CG1 | ILE | A | 844 | 81.335 | 75.337 | 59.540 | 1.00 | 0.00 | C |
| ATOM   | 1465 | CG2 | ILE | A | 844 | 81.115 | 73.759 | 57.507 | 1.00 | 0.00 | C |
| ATOM   | 1466 | CD1 | ILE | A | 844 | 80.584 | 74.577 | 60.629 | 1.00 | 0.00 | C |
| HETATM | 1467 | N   | HIE | A | 845 | 79.419 | 76.304 | 55.672 | 1.00 | 0.00 | N |
| HETATM | 1468 | CA  | HIE | A | 845 | 78.803 | 76.060 | 54.403 | 1.00 | 0.00 | C |
| HETATM | 1469 | C   | HIE | A | 845 | 79.524 | 76.852 | 53.360 | 1.00 | 0.00 | C |
| HETATM | 1470 | O   | HIE | A | 845 | 79.717 | 76.383 | 52.243 | 1.00 | 0.00 | O |
| HETATM | 1471 | CB  | HIE | A | 845 | 77.322 | 76.445 | 54.331 | 1.00 | 0.00 | C |
| HETATM | 1472 | CG  | HIE | A | 845 | 76.727 | 76.032 | 53.018 | 1.00 | 0.00 | C |
| HETATM | 1473 | CD2 | HIE | A | 845 | 76.459 | 76.770 | 51.904 | 1.00 | 0.00 | C |
| HETATM | 1474 | ND1 | HIE | A | 845 | 76.351 | 74.743 | 52.711 | 1.00 | 0.00 | N |
| HETATM | 1475 | CE1 | HIE | A | 845 | 75.879 | 74.761 | 51.443 | 1.00 | 0.00 | C |
| HETATM | 1476 | NE2 | HIE | A | 845 | 75.924 | 75.971 | 50.910 | 1.00 | 0.00 | N |
| ATOM   | 1477 | N   | ILE | A | 846 | 79.944 | 78.080 | 53.707 | 1.00 | 0.00 | N |
| ATOM   | 1478 | CA  | ILE | A | 846 | 80.601 | 78.925 | 52.756 | 1.00 | 0.00 | C |
| ATOM   | 1479 | C   | ILE | A | 846 | 81.855 | 78.240 | 52.313 | 1.00 | 0.00 | C |
| ATOM   | 1480 | O   | ILE | A | 846 | 82.171 | 78.216 | 51.125 | 1.00 | 0.00 | O |
| ATOM   | 1481 | CB  | ILE | A | 846 | 80.988 | 80.253 | 53.348 | 1.00 | 0.00 | C |
| ATOM   | 1482 | CG1 | ILE | A | 846 | 79.735 | 80.989 | 53.853 | 1.00 | 0.00 | C |
| ATOM   | 1483 | CG2 | ILE | A | 846 | 81.771 | 81.037 | 52.279 | 1.00 | 0.00 | C |
| ATOM   | 1484 | CD1 | ILE | A | 846 | 80.049 | 82.200 | 54.733 | 1.00 | 0.00 | C |
| ATOM   | 1485 | N   | PHE | A | 847 | 82.596 | 77.641 | 53.263 | 1.00 | 0.00 | N |
| ATOM   | 1486 | CA  | PHE | A | 847 | 83.835 | 77.001 | 52.926 | 1.00 | 0.00 | C |
| ATOM   | 1487 | C   | PHE | A | 847 | 83.537 | 75.864 | 51.996 | 1.00 | 0.00 | C |
| ATOM   | 1488 | O   | PHE | A | 847 | 84.236 | 75.660 | 51.004 | 1.00 | 0.00 | O |
| ATOM   | 1489 | CB  | PHE | A | 847 | 84.554 | 76.366 | 54.132 | 1.00 | 0.00 | C |



|      |      |     |           |        |        |        |      |      |   |
|------|------|-----|-----------|--------|--------|--------|------|------|---|
| ATOM | 1490 | CG  | PHE A 847 | 84.842 | 77.408 | 55.161 | 1.00 | 0.00 | C |
| ATOM | 1491 | CD1 | PHE A 847 | 85.789 | 78.387 | 54.945 | 1.00 | 0.00 | C |
| ATOM | 1492 | CD2 | PHE A 847 | 84.180 | 77.381 | 56.367 | 1.00 | 0.00 | C |
| ATOM | 1493 | CE1 | PHE A 847 | 86.041 | 79.331 | 55.908 | 1.00 | 0.00 | C |
| ATOM | 1494 | CE2 | PHE A 847 | 84.430 | 78.325 | 57.335 | 1.00 | 0.00 | C |
| ATOM | 1495 | CZ  | PHE A 847 | 85.364 | 79.308 | 57.105 | 1.00 | 0.00 | C |
| ATOM | 1496 | N   | THR A 848 | 82.470 | 75.103 | 52.297 | 1.00 | 0.00 | N |
| ATOM | 1497 | CA  | THR A 848 | 82.128 | 73.916 | 51.569 | 1.00 | 0.00 | C |
| ATOM | 1498 | C   | THR A 848 | 81.873 | 74.258 | 50.139 | 1.00 | 0.00 | C |
| ATOM | 1499 | O   | THR A 848 | 82.391 | 73.614 | 49.229 | 1.00 | 0.00 | O |
| ATOM | 1500 | CB  | THR A 848 | 80.850 | 73.314 | 52.066 | 1.00 | 0.00 | C |
| ATOM | 1501 | CG2 | THR A 848 | 80.625 | 71.978 | 51.343 | 1.00 | 0.00 | C |
| ATOM | 1502 | OG1 | THR A 848 | 80.930 | 73.098 | 53.466 | 1.00 | 0.00 | O |
| ATOM | 1503 | N   | VAL A 849 | 81.060 | 75.298 | 49.897 | 1.00 | 0.00 | N |
| ATOM | 1504 | CA  | VAL A 849 | 80.746 | 75.639 | 48.544 | 1.00 | 0.00 | C |
| ATOM | 1505 | C   | VAL A 849 | 81.998 | 76.068 | 47.860 | 1.00 | 0.00 | C |
| ATOM | 1506 | O   | VAL A 849 | 82.274 | 75.662 | 46.731 | 1.00 | 0.00 | O |
| ATOM | 1507 | CB  | VAL A 849 | 79.778 | 76.780 | 48.443 | 1.00 | 0.00 | C |
| ATOM | 1508 | CG1 | VAL A 849 | 79.605 | 77.142 | 46.959 | 1.00 | 0.00 | C |
| ATOM | 1509 | CG2 | VAL A 849 | 78.471 | 76.376 | 49.148 | 1.00 | 0.00 | C |
| ATOM | 1510 | N   | SER A 850 | 82.803 | 76.897 | 48.546 | 1.00 | 0.00 | N |
| ATOM | 1511 | CA  | SER A 850 | 83.993 | 77.444 | 47.966 | 1.00 | 0.00 | C |
| ATOM | 1512 | C   | SER A 850 | 84.925 | 76.330 | 47.618 | 1.00 | 0.00 | C |
| ATOM | 1513 | O   | SER A 850 | 85.534 | 76.335 | 46.547 | 1.00 | 0.00 | O |
| ATOM | 1514 | CB  | SER A 850 | 84.742 | 78.370 | 48.939 | 1.00 | 0.00 | C |
| ATOM | 1515 | OG  | SER A 850 | 83.922 | 79.474 | 49.293 | 1.00 | 0.00 | O |
| ATOM | 1516 | N   | ARG A 851 | 85.064 | 75.335 | 48.514 | 1.00 | 0.00 | N |
| ATOM | 1517 | CA  | ARG A 851 | 85.989 | 74.269 | 48.263 | 1.00 | 0.00 | C |
| ATOM | 1518 | C   | ARG A 851 | 85.571 | 73.493 | 47.055 | 1.00 | 0.00 | C |
| ATOM | 1519 | O   | ARG A 851 | 86.410 | 73.170 | 46.214 | 1.00 | 0.00 | O |
| ATOM | 1520 | CB  | ARG A 851 | 86.145 | 73.282 | 49.437 | 1.00 | 0.00 | C |
| ATOM | 1521 | CG  | ARG A 851 | 84.847 | 72.593 | 49.872 | 1.00 | 0.00 | C |
| ATOM | 1522 | CD  | ARG A 851 | 85.045 | 71.444 | 50.866 | 1.00 | 0.00 | C |
| ATOM | 1523 | NE  | ARG A 851 | 85.396 | 70.224 | 50.087 | 1.00 | 0.00 | N |
| ATOM | 1524 | CZ  | ARG A 851 | 84.419 | 69.332 | 49.745 | 1.00 | 0.00 | C |
| ATOM | 1525 | NH1 | ARG A 851 | 83.133 | 69.535 | 50.160 | 1.00 | 0.00 | N |
| ATOM | 1526 | NH2 | ARG A 851 | 84.726 | 68.234 | 48.995 | 1.00 | 0.00 | N |
| ATOM | 1527 | N   | ASN A 852 | 84.266 | 73.178 | 46.920 | 1.00 | 0.00 | N |
| ATOM | 1528 | CA  | ASN A 852 | 83.873 | 72.340 | 45.823 | 1.00 | 0.00 | C |
| ATOM | 1529 | C   | ASN A 852 | 83.064 | 73.135 | 44.837 | 1.00 | 0.00 | C |
| ATOM | 1530 | O   | ASN A 852 | 81.838 | 73.055 | 44.815 | 1.00 | 0.00 | O |
| ATOM | 1531 | CB  | ASN A 852 | 83.003 | 71.167 | 46.297 | 1.00 | 0.00 | C |
| ATOM | 1532 | CG  | ASN A 852 | 82.997 | 70.125 | 45.203 | 1.00 | 0.00 | C |
| ATOM | 1533 | ND2 | ASN A 852 | 82.490 | 68.908 | 45.544 | 1.00 | 0.00 | N |

|      |      |               |        |        |        |      |      |     |
|------|------|---------------|--------|--------|--------|------|------|-----|
| ATOM | 1534 | OD1 ASN A 852 | 83.438 | 70.382 | 44.085 | 1.00 | 0.00 | O   |
| ATOM | 1535 | N LEU A 853   | 83.759 | 73.951 | 44.023 | 1.00 | 0.00 | N   |
| ATOM | 1536 | CA LEU A 853  | 83.234 | 74.772 | 42.965 | 1.00 | 0.00 | C   |
| ATOM | 1537 | C LEU A 853   | 82.929 | 73.950 | 41.748 | 1.00 | 0.00 | C   |
| ATOM | 1538 | O LEU A 853   | 82.008 | 74.264 | 40.999 | 1.00 | 0.00 | O   |
| ATOM | 1539 | CB LEU A 853  | 84.241 | 75.890 | 42.594 | 1.00 | 0.00 | C   |
| ATOM | 1540 | CG LEU A 853  | 83.813 | 76.929 | 41.529 | 1.00 | 0.00 | C   |
| ATOM | 1541 | CD1 LEU A 853 | 84.859 | 78.053 | 41.449 | 1.00 | 0.00 | C   |
| ATOM | 1542 | CD2 LEU A 853 | 83.585 | 76.325 | 40.134 | 1.00 | 0.00 | C   |
| ATOM | 1543 | N GLY A 854   | 83.722 | 72.883 | 41.522 | 1.00 | 0.00 | N   |
| ATOM | 1544 | CA GLY A 854  | 83.723 | 72.086 | 40.319 | 1.00 | 0.00 | C   |
| ATOM | 1545 | C GLY A 854   | 82.360 | 71.624 | 39.916 | 1.00 | 0.00 | C   |
| ATOM | 1546 | O GLY A 854   | 81.356 | 71.866 | 40.579 | 1.00 | 0.00 | O   |
| ATOM | 1547 | N PRO A 855   | 82.365 | 70.797 | 38.873 | 1.00 | 0.00 | N   |
| ATOM | 1548 | CA PRO A 855  | 81.213 | 70.140 | 38.315 | 1.00 | 0.00 | C   |
| ATOM | 1549 | C PRO A 855   | 80.450 | 69.405 | 39.359 | 1.00 | 0.00 | C   |
| ATOM | 1550 | O PRO A 855   | 79.319 | 68.982 | 39.124 | 1.00 | 0.00 | O   |
| ATOM | 1551 | CB PRO A 855  | 81.726 | 69.314 | 37.142 | 1.00 | 0.00 | C   |
| ATOM | 1552 | CG PRO A 855  | 82.935 | 70.135 | 36.653 | 1.00 | 0.00 | C   |
| ATOM | 1553 | CD PRO A 855  | 83.455 | 70.847 | 37.914 | 1.00 | 0.00 | C   |
| ATOM | 1554 | N LYS A 856   | 81.078 | 69.280 | 40.521 | 1.00 | 0.00 | N   |
| ATOM | 1555 | CA LYS A 856  | 80.607 | 68.731 | 41.725 | 1.00 | 0.00 | C   |
| ATOM | 1556 | C LYS A 856   | 79.445 | 69.532 | 42.238 | 1.00 | 0.00 | C   |
| ATOM | 1557 | O LYS A 856   | 78.648 | 68.996 | 42.998 | 1.00 | 0.00 | O   |
| ATOM | 1558 | CB LYS A 856  | 81.687 | 68.716 | 42.805 | 1.00 | 0.00 | C   |
| ATOM | 1559 | CG LYS A 856  | 82.911 | 67.876 | 42.435 | 1.00 | 0.00 | C   |
| ATOM | 1560 | CD LYS A 856  | 83.817 | 68.514 | 41.380 | 1.00 | 0.00 | C   |
| ATOM | 1561 | CE LYS A 856  | 85.118 | 69.071 | 41.965 | 1.00 | 0.00 | C   |
| ATOM | 1562 | NZ LYS A 856  | 86.005 | 69.545 | 40.879 | 1.00 | 0.00 | N1+ |
| ATOM | 1563 | N ILE A 857   | 79.302 | 70.826 | 41.864 | 1.00 | 0.00 | N   |
| ATOM | 1564 | CA ILE A 857  | 78.234 | 71.601 | 42.445 | 1.00 | 0.00 | C   |
| ATOM | 1565 | C ILE A 857   | 76.919 | 70.961 | 42.187 | 1.00 | 0.00 | C   |
| ATOM | 1566 | O ILE A 857   | 76.079 | 70.885 | 43.084 | 1.00 | 0.00 | O   |
| ATOM | 1567 | CB ILE A 857  | 78.107 | 73.015 | 41.960 | 1.00 | 0.00 | C   |
| ATOM | 1568 | CG1 ILE A 857 | 76.923 | 73.688 | 42.671 | 1.00 | 0.00 | C   |
| ATOM | 1569 | CG2 ILE A 857 | 77.877 | 72.988 | 40.446 | 1.00 | 0.00 | C   |
| ATOM | 1570 | CD1 ILE A 857 | 77.009 | 73.692 | 44.192 | 1.00 | 0.00 | C   |
| ATOM | 1571 | N ILE A 858   | 76.700 | 70.456 | 40.966 | 1.00 | 0.00 | N   |
| ATOM | 1572 | CA ILE A 858  | 75.425 | 69.897 | 40.648 | 1.00 | 0.00 | C   |
| ATOM | 1573 | C ILE A 858   | 75.157 | 68.769 | 41.600 | 1.00 | 0.00 | C   |
| ATOM | 1574 | O ILE A 858   | 74.064 | 68.648 | 42.148 | 1.00 | 0.00 | O   |
| ATOM | 1575 | CB ILE A 858  | 75.400 | 69.419 | 39.211 | 1.00 | 0.00 | C   |
| ATOM | 1576 | CG1 ILE A 858 | 73.971 | 69.194 | 38.712 | 1.00 | 0.00 | C   |
| ATOM | 1577 | CG2 ILE A 858 | 76.326 | 68.207 | 39.049 | 1.00 | 0.00 | C   |

|           |               |        |        |        |      |      |   |
|-----------|---------------|--------|--------|--------|------|------|---|
| ATOM 1578 | CD1 ILE A 858 | 73.269 | 70.483 | 38.295 | 1.00 | 0.00 | C |
| ATOM 1579 | N MET A 859   | 76.177 | 67.925 | 41.844 | 1.00 | 0.00 | N |
| ATOM 1580 | CA MET A 859  | 76.055 | 66.788 | 42.705 | 1.00 | 0.00 | C |
| ATOM 1581 | C MET A 859   | 75.842 | 67.240 | 44.113 | 1.00 | 0.00 | C |
| ATOM 1582 | O MET A 859   | 75.059 | 66.647 | 44.855 | 1.00 | 0.00 | O |
| ATOM 1583 | CB MET A 859  | 77.314 | 65.904 | 42.674 | 1.00 | 0.00 | C |
| ATOM 1584 | CG MET A 859  | 77.165 | 64.570 | 43.410 | 1.00 | 0.00 | C |
| ATOM 1585 | SD MET A 859  | 77.127 | 64.680 | 45.223 | 1.00 | 0.00 | S |
| ATOM 1586 | CE MET A 859  | 78.911 | 64.978 | 45.365 | 1.00 | 0.00 | C |
| ATOM 1587 | N LEU A 860   | 76.537 | 68.320 | 44.503 | 1.00 | 0.00 | N |
| ATOM 1588 | CA LEU A 860  | 76.552 | 68.786 | 45.857 | 1.00 | 0.00 | C |
| ATOM 1589 | C LEU A 860   | 75.174 | 69.186 | 46.292 | 1.00 | 0.00 | C |
| ATOM 1590 | O LEU A 860   | 74.744 | 68.828 | 47.390 | 1.00 | 0.00 | O |
| ATOM 1591 | CB LEU A 860  | 77.531 | 69.977 | 46.005 | 1.00 | 0.00 | C |
| ATOM 1592 | CG LEU A 860  | 77.821 | 70.495 | 47.429 | 1.00 | 0.00 | C |
| ATOM 1593 | CD1 LEU A 860 | 78.877 | 71.611 | 47.376 | 1.00 | 0.00 | C |
| ATOM 1594 | CD2 LEU A 860 | 76.558 | 70.962 | 48.177 | 1.00 | 0.00 | C |
| ATOM 1595 | N GLN A 861   | 74.424 | 69.925 | 45.456 | 1.00 | 0.00 | N |
| ATOM 1596 | CA GLN A 861  | 73.148 | 70.403 | 45.914 | 1.00 | 0.00 | C |
| ATOM 1597 | C GLN A 861   | 72.197 | 69.269 | 46.153 | 1.00 | 0.00 | C |
| ATOM 1598 | O GLN A 861   | 71.500 | 69.246 | 47.166 | 1.00 | 0.00 | O |
| ATOM 1599 | CB GLN A 861  | 72.462 | 71.378 | 44.945 | 1.00 | 0.00 | C |
| ATOM 1600 | CG GLN A 861  | 71.143 | 71.907 | 45.516 | 1.00 | 0.00 | C |
| ATOM 1601 | CD GLN A 861  | 70.521 | 72.867 | 44.516 | 1.00 | 0.00 | C |
| ATOM 1602 | NE2 GLN A 861 | 69.399 | 73.517 | 44.923 | 1.00 | 0.00 | N |
| ATOM 1603 | OE1 GLN A 861 | 71.014 | 73.035 | 43.402 | 1.00 | 0.00 | O |
| ATOM 1604 | N ARG A 862   | 72.145 | 68.291 | 45.232 | 1.00 | 0.00 | N |
| ATOM 1605 | CA ARG A 862  | 71.213 | 67.202 | 45.346 | 1.00 | 0.00 | C |
| ATOM 1606 | C ARG A 862   | 71.543 | 66.412 | 46.570 | 1.00 | 0.00 | C |
| ATOM 1607 | O ARG A 862   | 70.659 | 65.982 | 47.309 | 1.00 | 0.00 | O |
| ATOM 1608 | CB ARG A 862  | 71.301 | 66.234 | 44.155 | 1.00 | 0.00 | C |
| ATOM 1609 | CG ARG A 862  | 70.329 | 65.057 | 44.226 | 1.00 | 0.00 | C |
| ATOM 1610 | CD ARG A 862  | 68.876 | 65.453 | 43.965 | 1.00 | 0.00 | C |
| ATOM 1611 | NE ARG A 862  | 68.076 | 64.198 | 43.953 | 1.00 | 0.00 | N |
| ATOM 1612 | CZ ARG A 862  | 67.579 | 63.698 | 45.122 | 1.00 | 0.00 | C |
| ATOM 1613 | NH1 ARG A 862 | 67.775 | 64.377 | 46.289 | 1.00 | 0.00 | N |
| ATOM 1614 | NH2 ARG A 862 | 66.886 | 62.522 | 45.121 | 1.00 | 0.00 | N |
| ATOM 1615 | N MET A 863   | 72.844 | 66.212 | 46.821 | 1.00 | 0.00 | N |
| ATOM 1616 | CA MET A 863  | 73.269 | 65.431 | 47.942 | 1.00 | 0.00 | C |
| ATOM 1617 | C MET A 863   | 72.806 | 66.120 | 49.180 | 1.00 | 0.00 | C |
| ATOM 1618 | O MET A 863   | 72.392 | 65.484 | 50.148 | 1.00 | 0.00 | O |
| ATOM 1619 | CB MET A 863  | 74.801 | 65.298 | 47.991 | 1.00 | 0.00 | C |
| ATOM 1620 | CG MET A 863  | 75.333 | 64.475 | 49.165 | 1.00 | 0.00 | C |
| ATOM 1621 | SD MET A 863  | 75.329 | 65.348 | 50.756 | 1.00 | 0.00 | S |

|      |      |     |     |   |     |        |        |        |      |      |   |
|------|------|-----|-----|---|-----|--------|--------|--------|------|------|---|
| ATOM | 1622 | CE  | MET | A | 863 | 76.115 | 63.995 | 51.677 | 1.00 | 0.00 | C |
| ATOM | 1623 | N   | LEU | A | 864 | 72.850 | 67.461 | 49.174 | 1.00 | 0.00 | N |
| ATOM | 1624 | CA  | LEU | A | 864 | 72.478 | 68.206 | 50.334 | 1.00 | 0.00 | C |
| ATOM | 1625 | C   | LEU | A | 864 | 71.041 | 67.932 | 50.642 | 1.00 | 0.00 | C |
| ATOM | 1626 | O   | LEU | A | 864 | 70.680 | 67.677 | 51.789 | 1.00 | 0.00 | O |
| ATOM | 1627 | CB  | LEU | A | 864 | 72.546 | 69.723 | 50.103 | 1.00 | 0.00 | C |
| ATOM | 1628 | CG  | LEU | A | 864 | 72.273 | 70.544 | 51.374 | 1.00 | 0.00 | C |
| ATOM | 1629 | CD1 | LEU | A | 864 | 73.528 | 70.624 | 52.256 | 1.00 | 0.00 | C |
| ATOM | 1630 | CD2 | LEU | A | 864 | 71.635 | 71.900 | 51.049 | 1.00 | 0.00 | C |
| ATOM | 1631 | N   | ILE | A | 865 | 70.173 | 67.975 | 49.618 | 1.00 | 0.00 | N |
| ATOM | 1632 | CA  | ILE | A | 865 | 68.776 | 67.819 | 49.892 | 1.00 | 0.00 | C |
| ATOM | 1633 | C   | ILE | A | 865 | 68.492 | 66.446 | 50.409 | 1.00 | 0.00 | C |
| ATOM | 1634 | O   | ILE | A | 865 | 67.778 | 66.290 | 51.399 | 1.00 | 0.00 | O |
| ATOM | 1635 | CB  | ILE | A | 865 | 67.894 | 68.084 | 48.703 | 1.00 | 0.00 | C |
| ATOM | 1636 | CG1 | ILE | A | 865 | 66.431 | 68.196 | 49.156 | 1.00 | 0.00 | C |
| ATOM | 1637 | CG2 | ILE | A | 865 | 68.137 | 67.006 | 47.636 | 1.00 | 0.00 | C |
| ATOM | 1638 | CD1 | ILE | A | 865 | 65.507 | 68.774 | 48.085 | 1.00 | 0.00 | C |
| ATOM | 1639 | N   | ASP | A | 866 | 69.054 | 65.398 | 49.771 | 1.00 | 0.00 | N |
| ATOM | 1640 | CA  | ASP | A | 866 | 68.710 | 64.079 | 50.210 | 1.00 | 0.00 | C |
| ATOM | 1641 | C   | ASP | A | 866 | 69.221 | 63.818 | 51.597 | 1.00 | 0.00 | C |
| ATOM | 1642 | O   | ASP | A | 866 | 68.540 | 63.170 | 52.393 | 1.00 | 0.00 | O |
| ATOM | 1643 | CB  | ASP | A | 866 | 69.102 | 62.957 | 49.220 | 1.00 | 0.00 | C |
| ATOM | 1644 | CG  | ASP | A | 866 | 70.592 | 62.913 | 48.914 | 1.00 | 0.00 | C |
| ATOM | 1645 | OD1 | ASP | A | 866 | 71.419 | 63.167 | 49.825 | 1.00 | 0.00 | O |
| ATOM | 1646 | OD2 | ASP | A | 866 | 70.920 | 62.616 | 47.737 | 1.00 | 0.00 | O |
| ATOM | 1647 | N   | VAL | A | 867 | 70.419 | 64.327 | 51.940 | 1.00 | 0.00 | N |
| ATOM | 1648 | CA  | VAL | A | 867 | 70.956 | 64.066 | 53.246 | 1.00 | 0.00 | C |
| ATOM | 1649 | C   | VAL | A | 867 | 70.083 | 64.708 | 54.278 | 1.00 | 0.00 | C |
| ATOM | 1650 | O   | VAL | A | 867 | 69.800 | 64.113 | 55.311 | 1.00 | 0.00 | O |
| ATOM | 1651 | CB  | VAL | A | 867 | 72.353 | 64.576 | 53.431 | 1.00 | 0.00 | C |
| ATOM | 1652 | CG1 | VAL | A | 867 | 73.270 | 63.827 | 52.452 | 1.00 | 0.00 | C |
| ATOM | 1653 | CG2 | VAL | A | 867 | 72.363 | 66.104 | 53.270 | 1.00 | 0.00 | C |
| ATOM | 1654 | N   | PHE | A | 868 | 69.611 | 65.942 | 54.021 | 1.00 | 0.00 | N |
| ATOM | 1655 | CA  | PHE | A | 868 | 68.808 | 66.610 | 55.007 | 1.00 | 0.00 | C |
| ATOM | 1656 | C   | PHE | A | 868 | 67.581 | 65.811 | 55.273 | 1.00 | 0.00 | C |
| ATOM | 1657 | O   | PHE | A | 868 | 67.180 | 65.648 | 56.424 | 1.00 | 0.00 | O |
| ATOM | 1658 | CB  | PHE | A | 868 | 68.355 | 68.023 | 54.600 | 1.00 | 0.00 | C |
| ATOM | 1659 | CG  | PHE | A | 868 | 69.470 | 68.967 | 54.883 | 1.00 | 0.00 | C |
| ATOM | 1660 | CD1 | PHE | A | 868 | 69.669 | 69.418 | 56.168 | 1.00 | 0.00 | C |
| ATOM | 1661 | CD2 | PHE | A | 868 | 70.300 | 69.415 | 53.886 | 1.00 | 0.00 | C |
| ATOM | 1662 | CE1 | PHE | A | 868 | 70.687 | 70.293 | 56.464 | 1.00 | 0.00 | C |
| ATOM | 1663 | CE2 | PHE | A | 868 | 71.320 | 70.292 | 54.180 | 1.00 | 0.00 | C |
| ATOM | 1664 | CZ  | PHE | A | 868 | 71.517 | 70.733 | 55.465 | 1.00 | 0.00 | C |
| ATOM | 1665 | N   | PHE | A | 869 | 66.953 | 65.283 | 54.211 | 1.00 | 0.00 | N |

|      |      |     |           |        |        |        |      |      |   |
|------|------|-----|-----------|--------|--------|--------|------|------|---|
| ATOM | 1666 | CA  | PHE A 869 | 65.752 | 64.525 | 54.381 | 1.00 | 0.00 | C |
| ATOM | 1667 | C   | PHE A 869 | 66.083 | 63.357 | 55.265 | 1.00 | 0.00 | C |
| ATOM | 1668 | O   | PHE A 869 | 65.384 | 63.080 | 56.236 | 1.00 | 0.00 | O |
| ATOM | 1669 | CB  | PHE A 869 | 65.247 | 63.976 | 53.032 | 1.00 | 0.00 | C |
| ATOM | 1670 | CG  | PHE A 869 | 63.959 | 63.251 | 53.222 | 1.00 | 0.00 | C |
| ATOM | 1671 | CD1 | PHE A 869 | 62.767 | 63.939 | 53.226 | 1.00 | 0.00 | C |
| ATOM | 1672 | CD2 | PHE A 869 | 63.940 | 61.884 | 53.385 | 1.00 | 0.00 | C |
| ATOM | 1673 | CE1 | PHE A 869 | 61.574 | 63.278 | 53.399 | 1.00 | 0.00 | C |
| ATOM | 1674 | CE2 | PHE A 869 | 62.750 | 61.215 | 53.557 | 1.00 | 0.00 | C |
| ATOM | 1675 | CZ  | PHE A 869 | 61.565 | 61.913 | 53.566 | 1.00 | 0.00 | C |
| ATOM | 1676 | N   | PHE A 870 | 67.201 | 62.670 | 54.963 | 1.00 | 0.00 | N |
| ATOM | 1677 | CA  | PHE A 870 | 67.607 | 61.494 | 55.679 | 1.00 | 0.00 | C |
| ATOM | 1678 | C   | PHE A 870 | 67.850 | 61.773 | 57.126 | 1.00 | 0.00 | C |
| ATOM | 1679 | O   | PHE A 870 | 67.325 | 61.074 | 57.989 | 1.00 | 0.00 | O |
| ATOM | 1680 | CB  | PHE A 870 | 68.890 | 60.878 | 55.088 | 1.00 | 0.00 | C |
| ATOM | 1681 | CG  | PHE A 870 | 69.482 | 59.931 | 56.072 | 1.00 | 0.00 | C |
| ATOM | 1682 | CD1 | PHE A 870 | 68.704 | 58.996 | 56.702 | 1.00 | 0.00 | C |
| ATOM | 1683 | CD2 | PHE A 870 | 70.829 | 59.943 | 56.344 | 1.00 | 0.00 | C |
| ATOM | 1684 | CE1 | PHE A 870 | 69.234 | 58.097 | 57.600 | 1.00 | 0.00 | C |
| ATOM | 1685 | CE2 | PHE A 870 | 71.376 | 59.050 | 57.241 | 1.00 | 0.00 | C |
| ATOM | 1686 | CZ  | PHE A 870 | 70.579 | 58.128 | 57.870 | 1.00 | 0.00 | C |
| ATOM | 1687 | N   | LEU A 871 | 68.645 | 62.808 | 57.435 | 1.00 | 0.00 | N |
| ATOM | 1688 | CA  | LEU A 871 | 68.951 | 63.056 | 58.811 | 1.00 | 0.00 | C |
| ATOM | 1689 | C   | LEU A 871 | 67.698 | 63.402 | 59.541 | 1.00 | 0.00 | C |
| ATOM | 1690 | O   | LEU A 871 | 67.517 | 63.001 | 60.687 | 1.00 | 0.00 | O |
| ATOM | 1691 | CB  | LEU A 871 | 69.970 | 64.190 | 59.029 | 1.00 | 0.00 | C |
| ATOM | 1692 | CG  | LEU A 871 | 71.424 | 63.796 | 58.707 | 1.00 | 0.00 | C |
| ATOM | 1693 | CD1 | LEU A 871 | 71.925 | 62.716 | 59.681 | 1.00 | 0.00 | C |
| ATOM | 1694 | CD2 | LEU A 871 | 71.610 | 63.389 | 57.239 | 1.00 | 0.00 | C |
| ATOM | 1695 | N   | PHE A 872 | 66.783 | 64.144 | 58.891 | 1.00 | 0.00 | N |
| ATOM | 1696 | CA  | PHE A 872 | 65.601 | 64.567 | 59.581 | 1.00 | 0.00 | C |
| ATOM | 1697 | C   | PHE A 872 | 64.827 | 63.366 | 60.020 | 1.00 | 0.00 | C |
| ATOM | 1698 | O   | PHE A 872 | 64.418 | 63.279 | 61.176 | 1.00 | 0.00 | O |
| ATOM | 1699 | CB  | PHE A 872 | 64.670 | 65.432 | 58.712 | 1.00 | 0.00 | C |
| ATOM | 1700 | CG  | PHE A 872 | 63.566 | 65.901 | 59.596 | 1.00 | 0.00 | C |
| ATOM | 1701 | CD1 | PHE A 872 | 63.757 | 66.976 | 60.433 | 1.00 | 0.00 | C |
| ATOM | 1702 | CD2 | PHE A 872 | 62.340 | 65.271 | 59.591 | 1.00 | 0.00 | C |
| ATOM | 1703 | CE1 | PHE A 872 | 62.746 | 67.418 | 61.254 | 1.00 | 0.00 | C |
| ATOM | 1704 | CE2 | PHE A 872 | 61.329 | 65.711 | 60.409 | 1.00 | 0.00 | C |
| ATOM | 1705 | CZ  | PHE A 872 | 61.528 | 66.783 | 61.242 | 1.00 | 0.00 | C |
| ATOM | 1706 | N   | LEU A 873 | 64.615 | 62.393 | 59.117 | 1.00 | 0.00 | N |
| ATOM | 1707 | CA  | LEU A 873 | 63.841 | 61.241 | 59.481 | 1.00 | 0.00 | C |
| ATOM | 1708 | C   | LEU A 873 | 64.537 | 60.442 | 60.537 | 1.00 | 0.00 | C |
| ATOM | 1709 | O   | LEU A 873 | 63.898 | 59.917 | 61.447 | 1.00 | 0.00 | O |

|      |      |     |     |   |     |        |        |        |      |      |   |
|------|------|-----|-----|---|-----|--------|--------|--------|------|------|---|
| ATOM | 1710 | CB  | LEU | A | 873 | 63.533 | 60.303 | 58.307 | 1.00 | 0.00 | C |
| ATOM | 1711 | CG  | LEU | A | 873 | 62.437 | 60.843 | 57.371 | 1.00 | 0.00 | C |
| ATOM | 1712 | CD1 | LEU | A | 873 | 62.848 | 62.161 | 56.701 | 1.00 | 0.00 | C |
| ATOM | 1713 | CD2 | LEU | A | 873 | 62.003 | 59.767 | 56.371 | 1.00 | 0.00 | C |
| ATOM | 1714 | N   | PHE | A | 874 | 65.868 | 60.310 | 60.455 | 1.00 | 0.00 | N |
| ATOM | 1715 | CA  | PHE | A | 874 | 66.511 | 59.467 | 61.416 | 1.00 | 0.00 | C |
| ATOM | 1716 | C   | PHE | A | 874 | 66.304 | 60.054 | 62.776 | 1.00 | 0.00 | C |
| ATOM | 1717 | O   | PHE | A | 874 | 65.927 | 59.354 | 63.716 | 1.00 | 0.00 | O |
| ATOM | 1718 | CB  | PHE | A | 874 | 68.025 | 59.342 | 61.170 | 1.00 | 0.00 | C |
| ATOM | 1719 | CG  | PHE | A | 874 | 68.503 | 58.153 | 61.929 | 1.00 | 0.00 | C |
| ATOM | 1720 | CD1 | PHE | A | 874 | 68.395 | 56.897 | 61.372 | 1.00 | 0.00 | C |
| ATOM | 1721 | CD2 | PHE | A | 874 | 69.062 | 58.275 | 63.179 | 1.00 | 0.00 | C |
| ATOM | 1722 | CE1 | PHE | A | 874 | 68.831 | 55.784 | 62.050 | 1.00 | 0.00 | C |
| ATOM | 1723 | CE2 | PHE | A | 874 | 69.499 | 57.165 | 63.861 | 1.00 | 0.00 | C |
| ATOM | 1724 | CZ  | PHE | A | 874 | 69.384 | 55.918 | 63.301 | 1.00 | 0.00 | C |
| ATOM | 1725 | N   | ALA | A | 875 | 66.525 | 61.375 | 62.910 | 1.00 | 0.00 | N |
| ATOM | 1726 | CA  | ALA | A | 875 | 66.406 | 62.035 | 64.178 | 1.00 | 0.00 | C |
| ATOM | 1727 | C   | ALA | A | 875 | 64.993 | 61.943 | 64.661 | 1.00 | 0.00 | C |
| ATOM | 1728 | O   | ALA | A | 875 | 64.757 | 61.683 | 65.838 | 1.00 | 0.00 | O |
| ATOM | 1729 | CB  | ALA | A | 875 | 66.772 | 63.528 | 64.102 | 1.00 | 0.00 | C |
| ATOM | 1730 | N   | VAL | A | 876 | 64.015 | 62.144 | 63.758 | 1.00 | 0.00 | N |
| ATOM | 1731 | CA  | VAL | A | 876 | 62.644 | 62.133 | 64.182 | 1.00 | 0.00 | C |
| ATOM | 1732 | C   | VAL | A | 876 | 62.299 | 60.778 | 64.693 | 1.00 | 0.00 | C |
| ATOM | 1733 | O   | VAL | A | 876 | 61.586 | 60.646 | 65.689 | 1.00 | 0.00 | O |
| ATOM | 1734 | CB  | VAL | A | 876 | 61.669 | 62.524 | 63.104 | 1.00 | 0.00 | C |
| ATOM | 1735 | CG1 | VAL | A | 876 | 61.986 | 63.972 | 62.701 | 1.00 | 0.00 | C |
| ATOM | 1736 | CG2 | VAL | A | 876 | 61.733 | 61.517 | 61.945 | 1.00 | 0.00 | C |
| ATOM | 1737 | N   | TRP | A | 877 | 62.794 | 59.719 | 64.033 | 1.00 | 0.00 | N |
| ATOM | 1738 | CA  | TRP | A | 877 | 62.478 | 58.398 | 64.486 | 1.00 | 0.00 | C |
| ATOM | 1739 | C   | TRP | A | 877 | 63.029 | 58.221 | 65.868 | 1.00 | 0.00 | C |
| ATOM | 1740 | O   | TRP | A | 877 | 62.343 | 57.722 | 66.757 | 1.00 | 0.00 | O |
| ATOM | 1741 | CB  | TRP | A | 877 | 63.090 | 57.296 | 63.605 | 1.00 | 0.00 | C |
| ATOM | 1742 | CG  | TRP | A | 877 | 62.860 | 55.897 | 64.127 | 1.00 | 0.00 | C |
| ATOM | 1743 | CD1 | TRP | A | 877 | 61.805 | 55.054 | 63.943 | 1.00 | 0.00 | C |
| ATOM | 1744 | CD2 | TRP | A | 877 | 63.801 | 55.199 | 64.955 | 1.00 | 0.00 | C |
| ATOM | 1745 | CE2 | TRP | A | 877 | 63.255 | 53.947 | 65.236 | 1.00 | 0.00 | C |
| ATOM | 1746 | CE3 | TRP | A | 877 | 65.023 | 55.569 | 65.441 | 1.00 | 0.00 | C |
| ATOM | 1747 | NE1 | TRP | A | 877 | 62.029 | 53.872 | 64.609 | 1.00 | 0.00 | N |
| ATOM | 1748 | CZ2 | TRP | A | 877 | 63.925 | 53.043 | 66.013 | 1.00 | 0.00 | C |
| ATOM | 1749 | CZ3 | TRP | A | 877 | 65.696 | 54.658 | 66.222 | 1.00 | 0.00 | C |
| ATOM | 1750 | CH2 | TRP | A | 877 | 65.157 | 53.422 | 66.503 | 1.00 | 0.00 | C |
| ATOM | 1751 | N   | MET | A | 878 | 64.287 | 58.647 | 66.084 | 1.00 | 0.00 | N |
| ATOM | 1752 | CA  | MET | A | 878 | 64.934 | 58.436 | 67.345 | 1.00 | 0.00 | C |
| ATOM | 1753 | C   | MET | A | 878 | 64.190 | 59.151 | 68.427 | 1.00 | 0.00 | C |

|      |      |     |           |        |        |        |      |      |   |
|------|------|-----|-----------|--------|--------|--------|------|------|---|
| ATOM | 1754 | O   | MET A 878 | 63.948 | 58.592 | 69.495 | 1.00 | 0.00 | O |
| ATOM | 1755 | CB  | MET A 878 | 66.374 | 58.974 | 67.364 | 1.00 | 0.00 | C |
| ATOM | 1756 | CG  | MET A 878 | 67.299 | 58.282 | 66.361 | 1.00 | 0.00 | C |
| ATOM | 1757 | SD  | MET A 878 | 69.012 | 58.897 | 66.357 | 1.00 | 0.00 | S |
| ATOM | 1758 | CE  | MET A 878 | 68.593 | 60.513 | 65.638 | 1.00 | 0.00 | C |
| ATOM | 1759 | N   | VAL A 879 | 63.789 | 60.409 | 68.173 | 1.00 | 0.00 | N |
| ATOM | 1760 | CA  | VAL A 879 | 63.120 | 61.179 | 69.183 | 1.00 | 0.00 | C |
| ATOM | 1761 | C   | VAL A 879 | 61.812 | 60.535 | 69.514 | 1.00 | 0.00 | C |
| ATOM | 1762 | O   | VAL A 879 | 61.426 | 60.465 | 70.679 | 1.00 | 0.00 | O |
| ATOM | 1763 | CB  | VAL A 879 | 62.843 | 62.597 | 68.779 | 1.00 | 0.00 | C |
| ATOM | 1764 | CG1 | VAL A 879 | 61.874 | 62.605 | 67.586 | 1.00 | 0.00 | C |
| ATOM | 1765 | CG2 | VAL A 879 | 62.301 | 63.341 | 70.010 | 1.00 | 0.00 | C |
| ATOM | 1766 | N   | ALA A 880 | 61.100 | 60.037 | 68.487 | 1.00 | 0.00 | N |
| ATOM | 1767 | CA  | ALA A 880 | 59.804 | 59.457 | 68.689 | 1.00 | 0.00 | C |
| ATOM | 1768 | C   | ALA A 880 | 59.940 | 58.267 | 69.581 | 1.00 | 0.00 | C |
| ATOM | 1769 | O   | ALA A 880 | 59.135 | 58.058 | 70.485 | 1.00 | 0.00 | O |
| ATOM | 1770 | CB  | ALA A 880 | 59.162 | 58.975 | 67.376 | 1.00 | 0.00 | C |
| ATOM | 1771 | N   | PHE A 881 | 60.977 | 57.448 | 69.351 | 1.00 | 0.00 | N |
| ATOM | 1772 | CA  | PHE A 881 | 61.165 | 56.266 | 70.134 | 1.00 | 0.00 | C |
| ATOM | 1773 | C   | PHE A 881 | 61.410 | 56.684 | 71.547 | 1.00 | 0.00 | C |
| ATOM | 1774 | O   | PHE A 881 | 60.846 | 56.116 | 72.482 | 1.00 | 0.00 | O |
| ATOM | 1775 | CB  | PHE A 881 | 62.384 | 55.451 | 69.665 | 1.00 | 0.00 | C |
| ATOM | 1776 | CG  | PHE A 881 | 62.527 | 54.239 | 70.515 | 1.00 | 0.00 | C |
| ATOM | 1777 | CD1 | PHE A 881 | 61.769 | 53.115 | 70.267 | 1.00 | 0.00 | C |
| ATOM | 1778 | CD2 | PHE A 881 | 63.428 | 54.211 | 71.554 | 1.00 | 0.00 | C |
| ATOM | 1779 | CE1 | PHE A 881 | 61.901 | 51.992 | 71.048 | 1.00 | 0.00 | C |
| ATOM | 1780 | CE2 | PHE A 881 | 63.564 | 53.090 | 72.338 | 1.00 | 0.00 | C |
| ATOM | 1781 | CZ  | PHE A 881 | 62.801 | 51.976 | 72.088 | 1.00 | 0.00 | C |
| ATOM | 1782 | N   | GLY A 882 | 62.249 | 57.719 | 71.733 | 1.00 | 0.00 | N |
| ATOM | 1783 | CA  | GLY A 882 | 62.616 | 58.150 | 73.045 | 1.00 | 0.00 | C |
| ATOM | 1784 | C   | GLY A 882 | 61.403 | 58.607 | 73.790 | 1.00 | 0.00 | C |
| ATOM | 1785 | O   | GLY A 882 | 61.251 | 58.300 | 74.973 | 1.00 | 0.00 | O |
| ATOM | 1786 | N   | VAL A 883 | 60.511 | 59.368 | 73.132 | 1.00 | 0.00 | N |
| ATOM | 1787 | CA  | VAL A 883 | 59.359 | 59.840 | 73.835 | 1.00 | 0.00 | C |
| ATOM | 1788 | C   | VAL A 883 | 58.515 | 58.668 | 74.217 | 1.00 | 0.00 | C |
| ATOM | 1789 | O   | VAL A 883 | 57.962 | 58.621 | 75.313 | 1.00 | 0.00 | O |
| ATOM | 1790 | CB  | VAL A 883 | 58.525 | 60.832 | 73.073 | 1.00 | 0.00 | C |
| ATOM | 1791 | CG1 | VAL A 883 | 59.376 | 62.088 | 72.836 | 1.00 | 0.00 | C |
| ATOM | 1792 | CG2 | VAL A 883 | 58.008 | 60.195 | 71.779 | 1.00 | 0.00 | C |
| ATOM | 1793 | N   | ALA A 884 | 58.406 | 57.672 | 73.321 | 1.00 | 0.00 | N |
| ATOM | 1794 | CA  | ALA A 884 | 57.581 | 56.532 | 73.601 | 1.00 | 0.00 | C |
| ATOM | 1795 | C   | ALA A 884 | 58.120 | 55.833 | 74.810 | 1.00 | 0.00 | C |
| ATOM | 1796 | O   | ALA A 884 | 57.363 | 55.427 | 75.691 | 1.00 | 0.00 | O |
| ATOM | 1797 | CB  | ALA A 884 | 57.569 | 55.514 | 72.448 | 1.00 | 0.00 | C |

|      |      |     |           |        |        |        |      |      |   |
|------|------|-----|-----------|--------|--------|--------|------|------|---|
| ATOM | 1798 | N   | ARG A 885 | 59.454 | 55.681 | 74.891 | 1.00 | 0.00 | N |
| ATOM | 1799 | CA  | ARG A 885 | 60.055 | 54.973 | 75.984 | 1.00 | 0.00 | C |
| ATOM | 1800 | C   | ARG A 885 | 59.788 | 55.703 | 77.257 | 1.00 | 0.00 | C |
| ATOM | 1801 | O   | ARG A 885 | 59.465 | 55.094 | 78.275 | 1.00 | 0.00 | O |
| ATOM | 1802 | CB  | ARG A 885 | 61.583 | 54.851 | 75.858 | 1.00 | 0.00 | C |
| ATOM | 1803 | CG  | ARG A 885 | 62.036 | 53.947 | 74.710 | 1.00 | 0.00 | C |
| ATOM | 1804 | CD  | ARG A 885 | 62.354 | 52.513 | 75.139 | 1.00 | 0.00 | C |
| ATOM | 1805 | NE  | ARG A 885 | 61.063 | 51.789 | 75.316 | 1.00 | 0.00 | N |
| ATOM | 1806 | CZ  | ARG A 885 | 60.473 | 51.736 | 76.548 | 1.00 | 0.00 | C |
| ATOM | 1807 | NH1 | ARG A 885 | 61.064 | 52.346 | 77.615 | 1.00 | 0.00 | N |
| ATOM | 1808 | NH2 | ARG A 885 | 59.292 | 51.069 | 76.713 | 1.00 | 0.00 | N |
| ATOM | 1809 | N   | GLN A 886 | 59.904 | 57.042 | 77.234 | 1.00 | 0.00 | N |
| ATOM | 1810 | CA  | GLN A 886 | 59.725 | 57.772 | 78.450 | 1.00 | 0.00 | C |
| ATOM | 1811 | C   | GLN A 886 | 58.327 | 57.548 | 78.919 | 1.00 | 0.00 | C |
| ATOM | 1812 | O   | GLN A 886 | 58.092 | 57.347 | 80.110 | 1.00 | 0.00 | O |
| ATOM | 1813 | CB  | GLN A 886 | 59.902 | 59.283 | 78.278 | 1.00 | 0.00 | C |
| ATOM | 1814 | CG  | GLN A 886 | 59.840 | 60.042 | 79.602 | 1.00 | 0.00 | C |
| ATOM | 1815 | CD  | GLN A 886 | 59.743 | 61.512 | 79.249 | 1.00 | 0.00 | C |
| ATOM | 1816 | NE2 | GLN A 886 | 60.057 | 62.405 | 80.226 | 1.00 | 0.00 | N |
| ATOM | 1817 | OE1 | GLN A 886 | 59.373 | 61.850 | 78.125 | 1.00 | 0.00 | O |
| ATOM | 1818 | N   | GLY A 887 | 57.360 | 57.565 | 77.984 | 1.00 | 0.00 | N |
| ATOM | 1819 | CA  | GLY A 887 | 55.988 | 57.403 | 78.362 | 1.00 | 0.00 | C |
| ATOM | 1820 | C   | GLY A 887 | 55.810 | 56.049 | 78.973 | 1.00 | 0.00 | C |
| ATOM | 1821 | O   | GLY A 887 | 55.114 | 55.895 | 79.976 | 1.00 | 0.00 | O |
| ATOM | 1822 | N   | ILE A 888 | 56.434 | 55.025 | 78.367 | 1.00 | 0.00 | N |
| ATOM | 1823 | CA  | ILE A 888 | 56.291 | 53.683 | 78.841 | 1.00 | 0.00 | C |
| ATOM | 1824 | C   | ILE A 888 | 56.887 | 53.555 | 80.207 | 1.00 | 0.00 | C |
| ATOM | 1825 | O   | ILE A 888 | 56.286 | 52.955 | 81.098 | 1.00 | 0.00 | O |
| ATOM | 1826 | CB  | ILE A 888 | 56.993 | 52.682 | 77.967 | 1.00 | 0.00 | C |
| ATOM | 1827 | CG1 | ILE A 888 | 56.372 | 52.664 | 76.562 | 1.00 | 0.00 | C |
| ATOM | 1828 | CG2 | ILE A 888 | 56.951 | 51.321 | 78.681 | 1.00 | 0.00 | C |
| ATOM | 1829 | CD1 | ILE A 888 | 54.896 | 52.264 | 76.552 | 1.00 | 0.00 | C |
| ATOM | 1830 | N   | LEU A 889 | 58.081 | 54.137 | 80.414 | 1.00 | 0.00 | N |
| ATOM | 1831 | CA  | LEU A 889 | 58.783 | 53.932 | 81.643 | 1.00 | 0.00 | C |
| ATOM | 1832 | C   | LEU A 889 | 57.986 | 54.440 | 82.800 | 1.00 | 0.00 | C |
| ATOM | 1833 | O   | LEU A 889 | 57.770 | 53.719 | 83.772 | 1.00 | 0.00 | O |
| ATOM | 1834 | CB  | LEU A 889 | 60.136 | 54.672 | 81.685 | 1.00 | 0.00 | C |
| ATOM | 1835 | CG  | LEU A 889 | 61.129 | 54.223 | 80.600 | 1.00 | 0.00 | C |
| ATOM | 1836 | CD1 | LEU A 889 | 62.455 | 54.994 | 80.703 | 1.00 | 0.00 | C |
| ATOM | 1837 | CD2 | LEU A 889 | 61.322 | 52.698 | 80.610 | 1.00 | 0.00 | C |
| ATOM | 1838 | N   | ARG A 890 | 57.504 | 55.693 | 82.726 | 1.00 | 0.00 | N |
| ATOM | 1839 | CA  | ARG A 890 | 56.798 | 56.224 | 83.851 | 1.00 | 0.00 | C |
| ATOM | 1840 | C   | ARG A 890 | 56.051 | 57.421 | 83.370 | 1.00 | 0.00 | C |
| ATOM | 1841 | O   | ARG A 890 | 56.159 | 57.807 | 82.208 | 1.00 | 0.00 | O |



|      |      |     |     |   |     |        |        |        |      |      |   |
|------|------|-----|-----|---|-----|--------|--------|--------|------|------|---|
| ATOM | 1842 | CB  | ARG | A | 890 | 57.738 | 56.703 | 84.970 | 1.00 | 0.00 | C |
| ATOM | 1843 | CG  | ARG | A | 890 | 58.687 | 57.812 | 84.508 | 1.00 | 0.00 | C |
| ATOM | 1844 | CD  | ARG | A | 890 | 59.769 | 58.182 | 85.523 | 1.00 | 0.00 | C |
| ATOM | 1845 | NE  | ARG | A | 890 | 60.917 | 57.255 | 85.320 | 1.00 | 0.00 | N |
| ATOM | 1846 | CZ  | ARG | A | 890 | 61.024 | 56.118 | 86.068 | 1.00 | 0.00 | C |
| ATOM | 1847 | NH1 | ARG | A | 890 | 60.085 | 55.836 | 87.019 | 1.00 | 0.00 | N |
| ATOM | 1848 | NH2 | ARG | A | 890 | 62.074 | 55.268 | 85.870 | 1.00 | 0.00 | N |
| ATOM | 1849 | N   | GLN | A | 891 | 55.250 | 58.038 | 84.259 | 1.00 | 0.00 | N |
| ATOM | 1850 | CA  | GLN | A | 891 | 54.556 | 59.216 | 83.844 | 1.00 | 0.00 | C |
| ATOM | 1851 | C   | GLN | A | 891 | 55.580 | 60.286 | 83.682 | 1.00 | 0.00 | C |
| ATOM | 1852 | O   | GLN | A | 891 | 56.606 | 60.290 | 84.363 | 1.00 | 0.00 | O |
| ATOM | 1853 | CB  | GLN | A | 891 | 53.468 | 59.696 | 84.823 | 1.00 | 0.00 | C |
| ATOM | 1854 | CG  | GLN | A | 891 | 53.979 | 60.026 | 86.226 | 1.00 | 0.00 | C |
| ATOM | 1855 | CD  | GLN | A | 891 | 54.028 | 58.722 | 87.004 | 1.00 | 0.00 | C |
| ATOM | 1856 | NE2 | GLN | A | 891 | 53.190 | 57.737 | 86.581 | 1.00 | 0.00 | N |
| ATOM | 1857 | OE1 | GLN | A | 891 | 54.784 | 58.580 | 87.964 | 1.00 | 0.00 | O |
| ATOM | 1858 | N   | ASN | A | 892 | 55.339 | 61.211 | 82.736 | 1.00 | 0.00 | N |
| ATOM | 1859 | CA  | ASN | A | 892 | 56.282 | 62.256 | 82.489 | 1.00 | 0.00 | C |
| ATOM | 1860 | C   | ASN | A | 892 | 56.248 | 63.131 | 83.682 | 1.00 | 0.00 | C |
| ATOM | 1861 | O   | ASN | A | 892 | 55.210 | 63.298 | 84.320 | 1.00 | 0.00 | O |
| ATOM | 1862 | CB  | ASN | A | 892 | 55.918 | 63.123 | 81.274 | 1.00 | 0.00 | C |
| ATOM | 1863 | CG  | ASN | A | 892 | 55.952 | 62.230 | 80.046 | 1.00 | 0.00 | C |
| ATOM | 1864 | ND2 | ASN | A | 892 | 57.006 | 62.393 | 79.205 | 1.00 | 0.00 | N |
| ATOM | 1865 | OD1 | ASN | A | 892 | 55.062 | 61.407 | 79.835 | 1.00 | 0.00 | O |
| ATOM | 1866 | N   | GLU | A | 893 | 57.399 | 63.718 | 84.038 | 1.00 | 0.00 | N |
| ATOM | 1867 | CA  | GLU | A | 893 | 57.314 | 64.543 | 85.195 | 1.00 | 0.00 | C |
| ATOM | 1868 | C   | GLU | A | 893 | 56.791 | 65.875 | 84.743 | 1.00 | 0.00 | C |
| ATOM | 1869 | O   | GLU | A | 893 | 57.518 | 66.610 | 84.059 | 1.00 | 0.00 | O |
| ATOM | 1870 | CB  | GLU | A | 893 | 58.655 | 64.743 | 85.893 | 1.00 | 0.00 | C |
| ATOM | 1871 | CG  | GLU | A | 893 | 58.585 | 65.403 | 87.263 | 1.00 | 0.00 | C |
| ATOM | 1872 | CD  | GLU | A | 893 | 58.267 | 64.330 | 88.294 | 1.00 | 0.00 | C |
| ATOM | 1873 | OE1 | GLU | A | 893 | 58.211 | 63.133 | 87.908 | 1.00 | 0.00 | O |
| ATOM | 1874 | OE2 | GLU | A | 893 | 58.079 | 64.694 | 89.487 | 1.00 | 0.00 | O |
| ATOM | 1875 | N   | GLN | A | 894 | 55.501 | 66.160 | 85.102 | 1.00 | 0.00 | N |
| ATOM | 1876 | CA  | GLN | A | 894 | 54.770 | 67.362 | 84.783 | 1.00 | 0.00 | C |
| ATOM | 1877 | C   | GLN | A | 894 | 55.387 | 68.498 | 85.519 | 1.00 | 0.00 | C |
| ATOM | 1878 | O   | GLN | A | 894 | 55.613 | 69.570 | 84.957 | 1.00 | 0.00 | O |
| ATOM | 1879 | CB  | GLN | A | 894 | 53.284 | 67.298 | 85.171 | 1.00 | 0.00 | C |
| ATOM | 1880 | CG  | GLN | A | 894 | 53.030 | 67.200 | 86.676 | 1.00 | 0.00 | C |
| ATOM | 1881 | CD  | GLN | A | 894 | 51.524 | 67.148 | 86.885 | 1.00 | 0.00 | C |
| ATOM | 1882 | NE2 | GLN | A | 894 | 50.864 | 66.121 | 86.282 | 1.00 | 0.00 | N |
| ATOM | 1883 | OE1 | GLN | A | 894 | 50.948 | 67.997 | 87.562 | 1.00 | 0.00 | O |
| ATOM | 1884 | N   | ARG | A | 895 | 55.683 | 68.285 | 86.814 | 1.00 | 0.00 | N |
| ATOM | 1885 | CA  | ARG | A | 895 | 56.305 | 69.333 | 87.557 | 1.00 | 0.00 | C |

|           |     |           |        |        |        |      |      |   |
|-----------|-----|-----------|--------|--------|--------|------|------|---|
| ATOM 1886 | C   | ARG A 895 | 57.628 | 69.580 | 86.927 | 1.00 | 0.00 | C |
| ATOM 1887 | O   | ARG A 895 | 58.010 | 70.725 | 86.696 | 1.00 | 0.00 | O |
| ATOM 1888 | CB  | ARG A 895 | 56.575 | 68.973 | 89.025 | 1.00 | 0.00 | C |
| ATOM 1889 | CG  | ARG A 895 | 55.325 | 68.962 | 89.907 | 1.00 | 0.00 | C |
| ATOM 1890 | CD  | ARG A 895 | 54.623 | 70.322 | 89.963 | 1.00 | 0.00 | C |
| ATOM 1891 | NE  | ARG A 895 | 53.708 | 70.312 | 91.137 | 1.00 | 0.00 | N |
| ATOM 1892 | CZ  | ARG A 895 | 52.464 | 69.752 | 91.046 | 1.00 | 0.00 | C |
| ATOM 1893 | NH1 | ARG A 895 | 52.069 | 69.137 | 89.894 | 1.00 | 0.00 | N |
| ATOM 1894 | NH2 | ARG A 895 | 51.617 | 69.809 | 92.115 | 1.00 | 0.00 | N |
| ATOM 1895 | N   | TRP A 896 | 58.364 | 68.496 | 86.612 | 1.00 | 0.00 | N |
| ATOM 1896 | CA  | TRP A 896 | 59.663 | 68.707 | 86.052 | 1.00 | 0.00 | C |
| ATOM 1897 | C   | TRP A 896 | 59.644 | 68.247 | 84.634 | 1.00 | 0.00 | C |
| ATOM 1898 | O   | TRP A 896 | 60.100 | 67.145 | 84.317 | 1.00 | 0.00 | O |
| ATOM 1899 | CB  | TRP A 896 | 60.746 | 67.919 | 86.806 | 1.00 | 0.00 | C |
| ATOM 1900 | CG  | TRP A 896 | 61.007 | 68.410 | 88.214 | 1.00 | 0.00 | C |
| ATOM 1901 | CD1 | TRP A 896 | 61.972 | 69.262 | 88.664 | 1.00 | 0.00 | C |
| ATOM 1902 | CD2 | TRP A 896 | 60.233 | 68.036 | 89.367 | 1.00 | 0.00 | C |
| ATOM 1903 | CE2 | TRP A 896 | 60.787 | 68.688 | 90.468 | 1.00 | 0.00 | C |
| ATOM 1904 | CE3 | TRP A 896 | 59.150 | 67.219 | 89.500 | 1.00 | 0.00 | C |
| ATOM 1905 | NE1 | TRP A 896 | 61.851 | 69.437 | 90.022 | 1.00 | 0.00 | N |
| ATOM 1906 | CZ2 | TRP A 896 | 60.258 | 68.533 | 91.719 | 1.00 | 0.00 | C |
| ATOM 1907 | CZ3 | TRP A 896 | 58.623 | 67.062 | 90.764 | 1.00 | 0.00 | C |
| ATOM 1908 | CH2 | TRP A 896 | 59.168 | 67.704 | 91.854 | 1.00 | 0.00 | C |
| ATOM 1909 | N   | ARG A 897 | 59.102 | 69.089 | 83.736 | 1.00 | 0.00 | N |
| ATOM 1910 | CA  | ARG A 897 | 59.079 | 68.749 | 82.345 | 1.00 | 0.00 | C |
| ATOM 1911 | C   | ARG A 897 | 60.478 | 68.797 | 81.835 | 1.00 | 0.00 | C |
| ATOM 1912 | O   | ARG A 897 | 60.910 | 67.946 | 81.061 | 1.00 | 0.00 | O |
| ATOM 1913 | CB  | ARG A 897 | 58.274 | 69.732 | 81.489 | 1.00 | 0.00 | C |
| ATOM 1914 | CG  | ARG A 897 | 58.164 | 69.246 | 80.045 | 1.00 | 0.00 | C |
| ATOM 1915 | CD  | ARG A 897 | 57.644 | 70.282 | 79.055 | 1.00 | 0.00 | C |
| ATOM 1916 | NE  | ARG A 897 | 57.417 | 69.564 | 77.771 | 1.00 | 0.00 | N |
| ATOM 1917 | CZ  | ARG A 897 | 57.650 | 70.178 | 76.573 | 1.00 | 0.00 | C |
| ATOM 1918 | NH1 | ARG A 897 | 58.142 | 71.452 | 76.539 | 1.00 | 0.00 | N |
| ATOM 1919 | NH2 | ARG A 897 | 57.393 | 69.513 | 75.408 | 1.00 | 0.00 | N |
| ATOM 1920 | N   | TRP A 898 | 61.224 | 69.819 | 82.284 | 1.00 | 0.00 | N |
| ATOM 1921 | CA  | TRP A 898 | 62.547 | 70.050 | 81.790 | 1.00 | 0.00 | C |
| ATOM 1922 | C   | TRP A 898 | 63.431 | 68.897 | 82.113 | 1.00 | 0.00 | C |
| ATOM 1923 | O   | TRP A 898 | 64.100 | 68.357 | 81.230 | 1.00 | 0.00 | O |
| ATOM 1924 | CB  | TRP A 898 | 63.220 | 71.279 | 82.423 | 1.00 | 0.00 | C |
| ATOM 1925 | CG  | TRP A 898 | 62.560 | 72.594 | 82.101 | 1.00 | 0.00 | C |
| ATOM 1926 | CD1 | TRP A 898 | 61.822 | 73.413 | 82.903 | 1.00 | 0.00 | C |
| ATOM 1927 | CD2 | TRP A 898 | 62.602 | 73.218 | 80.809 | 1.00 | 0.00 | C |
| ATOM 1928 | CE2 | TRP A 898 | 61.876 | 74.404 | 80.901 | 1.00 | 0.00 | C |
| ATOM 1929 | CE3 | TRP A 898 | 63.189 | 72.830 | 79.640 | 1.00 | 0.00 | C |

|      |      |               |        |        |        |      |      |   |
|------|------|---------------|--------|--------|--------|------|------|---|
| ATOM | 1930 | NE1 TRP A 898 | 61.405 | 74.513 | 82.196 | 1.00 | 0.00 | N |
| ATOM | 1931 | CZ2 TRP A 898 | 61.729 | 75.225 | 79.823 | 1.00 | 0.00 | C |
| ATOM | 1932 | CZ3 TRP A 898 | 63.040 | 73.663 | 78.554 | 1.00 | 0.00 | C |
| ATOM | 1933 | CH2 TRP A 898 | 62.324 | 74.838 | 78.644 | 1.00 | 0.00 | C |
| ATOM | 1934 | N ILE A 899   | 63.460 | 68.474 | 83.389 | 1.00 | 0.00 | N |
| ATOM | 1935 | CA ILE A 899  | 64.403 | 67.453 | 83.736 | 1.00 | 0.00 | C |
| ATOM | 1936 | C ILE A 899   | 64.057 | 66.184 | 83.032 | 1.00 | 0.00 | C |
| ATOM | 1937 | O ILE A 899   | 64.930 | 65.534 | 82.460 | 1.00 | 0.00 | O |
| ATOM | 1938 | CB ILE A 899  | 64.507 | 67.194 | 85.213 | 1.00 | 0.00 | C |
| ATOM | 1939 | CG1 ILE A 899 | 65.702 | 66.277 | 85.518 | 1.00 | 0.00 | C |
| ATOM | 1940 | CG2 ILE A 899 | 63.166 | 66.652 | 85.713 | 1.00 | 0.00 | C |
| ATOM | 1941 | CD1 ILE A 899 | 66.032 | 66.179 | 87.007 | 1.00 | 0.00 | C |
| ATOM | 1942 | N PHE A 900   | 62.767 | 65.802 | 83.035 | 1.00 | 0.00 | N |
| ATOM | 1943 | CA PHE A 900  | 62.391 | 64.573 | 82.406 | 1.00 | 0.00 | C |
| ATOM | 1944 | C PHE A 900   | 62.649 | 64.638 | 80.940 | 1.00 | 0.00 | C |
| ATOM | 1945 | O PHE A 900   | 63.171 | 63.683 | 80.372 | 1.00 | 0.00 | O |
| ATOM | 1946 | CB PHE A 900  | 60.925 | 64.211 | 82.667 | 1.00 | 0.00 | C |
| ATOM | 1947 | CG PHE A 900  | 60.915 | 63.644 | 84.043 | 1.00 | 0.00 | C |
| ATOM | 1948 | CD1 PHE A 900 | 61.426 | 64.368 | 85.093 | 1.00 | 0.00 | C |
| ATOM | 1949 | CD2 PHE A 900 | 60.477 | 62.361 | 84.271 | 1.00 | 0.00 | C |
| ATOM | 1950 | CE1 PHE A 900 | 61.427 | 63.854 | 86.368 | 1.00 | 0.00 | C |
| ATOM | 1951 | CE2 PHE A 900 | 60.477 | 61.839 | 85.544 | 1.00 | 0.00 | C |
| ATOM | 1952 | CZ PHE A 900  | 60.943 | 62.589 | 86.597 | 1.00 | 0.00 | C |
| ATOM | 1953 | N ARG A 901   | 62.300 | 65.762 | 80.285 | 1.00 | 0.00 | N |
| ATOM | 1954 | CA ARG A 901  | 62.500 | 65.831 | 78.863 | 1.00 | 0.00 | C |
| ATOM | 1955 | C ARG A 901   | 63.960 | 65.708 | 78.571 | 1.00 | 0.00 | C |
| ATOM | 1956 | O ARG A 901   | 64.360 | 64.969 | 77.674 | 1.00 | 0.00 | O |
| ATOM | 1957 | CB ARG A 901  | 62.025 | 67.148 | 78.226 | 1.00 | 0.00 | C |
| ATOM | 1958 | CG ARG A 901  | 62.131 | 67.126 | 76.696 | 1.00 | 0.00 | C |
| ATOM | 1959 | CD ARG A 901  | 61.668 | 68.412 | 76.012 | 1.00 | 0.00 | C |
| ATOM | 1960 | NE ARG A 901  | 62.867 | 69.271 | 75.807 | 1.00 | 0.00 | N |
| ATOM | 1961 | CZ ARG A 901  | 63.234 | 70.173 | 76.762 | 1.00 | 0.00 | C |
| ATOM | 1962 | NH1 ARG A 901 | 62.492 | 70.299 | 77.903 | 1.00 | 0.00 | N |
| ATOM | 1963 | NH2 ARG A 901 | 64.343 | 70.948 | 76.579 | 1.00 | 0.00 | N |
| ATOM | 1964 | N SER A 902   | 64.800 | 66.426 | 79.340 | 1.00 | 0.00 | N |
| ATOM | 1965 | CA SER A 902  | 66.212 | 66.399 | 79.081 | 1.00 | 0.00 | C |
| ATOM | 1966 | C SER A 902   | 66.693 | 65.002 | 79.283 | 1.00 | 0.00 | C |
| ATOM | 1967 | O SER A 902   | 67.505 | 64.496 | 78.511 | 1.00 | 0.00 | O |
| ATOM | 1968 | CB SER A 902  | 67.005 | 67.314 | 80.037 | 1.00 | 0.00 | C |
| ATOM | 1969 | OG SER A 902  | 66.889 | 66.849 | 81.375 | 1.00 | 0.00 | O |
| ATOM | 1970 | N VAL A 903   | 66.172 | 64.334 | 80.324 | 1.00 | 0.00 | N |
| ATOM | 1971 | CA VAL A 903  | 66.587 | 62.998 | 80.622 | 1.00 | 0.00 | C |
| ATOM | 1972 | C VAL A 903   | 66.203 | 62.130 | 79.471 | 1.00 | 0.00 | C |
| ATOM | 1973 | O VAL A 903   | 66.927 | 61.201 | 79.119 | 1.00 | 0.00 | O |

|                         |        |        |        |      |      |   |
|-------------------------|--------|--------|--------|------|------|---|
| ATOM 1974 CB VAL A 903  | 65.930 | 62.437 | 81.849 | 1.00 | 0.00 | C |
| ATOM 1975 CG1 VAL A 903 | 66.294 | 60.947 | 81.964 | 1.00 | 0.00 | C |
| ATOM 1976 CG2 VAL A 903 | 66.370 | 63.274 | 83.060 | 1.00 | 0.00 | C |
| ATOM 1977 N ILE A 904   | 65.039 | 62.411 | 78.856 | 1.00 | 0.00 | N |
| ATOM 1978 CA ILE A 904  | 64.578 | 61.588 | 77.781 | 1.00 | 0.00 | C |
| ATOM 1979 C ILE A 904   | 65.558 | 61.698 | 76.659 | 1.00 | 0.00 | C |
| ATOM 1980 O ILE A 904   | 65.925 | 60.707 | 76.033 | 1.00 | 0.00 | O |
| ATOM 1981 CB ILE A 904  | 63.363 | 62.129 | 77.086 | 1.00 | 0.00 | C |
| ATOM 1982 CG1 ILE A 904 | 62.266 | 62.605 | 78.031 | 1.00 | 0.00 | C |
| ATOM 1983 CG2 ILE A 904 | 62.866 | 61.020 | 76.147 | 1.00 | 0.00 | C |
| ATOM 1984 CD1 ILE A 904 | 61.324 | 63.574 | 77.316 | 1.00 | 0.00 | C |
| ATOM 1985 N TYR A 905   | 65.930 | 62.945 | 76.312 | 1.00 | 0.00 | N |
| ATOM 1986 CA TYR A 905  | 66.768 | 63.154 | 75.169 | 1.00 | 0.00 | C |
| ATOM 1987 C TYR A 905   | 68.210 | 62.766 | 75.326 | 1.00 | 0.00 | C |
| ATOM 1988 O TYR A 905   | 68.711 | 61.928 | 74.579 | 1.00 | 0.00 | O |
| ATOM 1989 CB TYR A 905  | 66.752 | 64.616 | 74.694 | 1.00 | 0.00 | C |
| ATOM 1990 CG TYR A 905  | 65.416 | 64.868 | 74.086 | 1.00 | 0.00 | C |
| ATOM 1991 CD1 TYR A 905 | 64.307 | 65.081 | 74.870 | 1.00 | 0.00 | C |
| ATOM 1992 CD2 TYR A 905 | 65.283 | 64.892 | 72.716 | 1.00 | 0.00 | C |
| ATOM 1993 CE1 TYR A 905 | 63.079 | 65.307 | 74.291 | 1.00 | 0.00 | C |
| ATOM 1994 CE2 TYR A 905 | 64.059 | 65.120 | 72.136 | 1.00 | 0.00 | C |
| ATOM 1995 CZ TYR A 905  | 62.955 | 65.328 | 72.924 | 1.00 | 0.00 | C |
| ATOM 1996 OH TYR A 905  | 61.696 | 65.560 | 72.329 | 1.00 | 0.00 | O |
| ATOM 1997 N GLU A 906   | 68.912 | 63.323 | 76.329 | 1.00 | 0.00 | N |
| ATOM 1998 CA GLU A 906  | 70.344 | 63.189 | 76.302 | 1.00 | 0.00 | C |
| ATOM 1999 C GLU A 906   | 70.841 | 61.795 | 76.516 | 1.00 | 0.00 | C |
| ATOM 2000 O GLU A 906   | 71.657 | 61.325 | 75.727 | 1.00 | 0.00 | O |
| ATOM 2001 CB GLU A 906  | 71.069 | 64.123 | 77.288 | 1.00 | 0.00 | C |
| ATOM 2002 CG GLU A 906  | 72.585 | 64.111 | 77.092 | 1.00 | 0.00 | C |
| ATOM 2003 CD GLU A 906  | 72.865 | 64.682 | 75.710 | 1.00 | 0.00 | C |
| ATOM 2004 OE1 GLU A 906 | 72.271 | 65.744 | 75.379 | 1.00 | 0.00 | O |
| ATOM 2005 OE2 GLU A 906 | 73.668 | 64.061 | 74.964 | 1.00 | 0.00 | O |
| ATOM 2006 N PRO A 907   | 70.414 | 61.093 | 77.523 | 1.00 | 0.00 | N |
| ATOM 2007 CA PRO A 907  | 70.963 | 59.780 | 77.699 | 1.00 | 0.00 | C |
| ATOM 2008 C PRO A 907   | 70.513 | 58.857 | 76.620 | 1.00 | 0.00 | C |
| ATOM 2009 O PRO A 907   | 71.237 | 57.917 | 76.297 | 1.00 | 0.00 | O |
| ATOM 2010 CB PRO A 907  | 70.565 | 59.347 | 79.108 | 1.00 | 0.00 | C |
| ATOM 2011 CG PRO A 907  | 70.455 | 60.679 | 79.871 | 1.00 | 0.00 | C |
| ATOM 2012 CD PRO A 907  | 70.060 | 61.705 | 78.798 | 1.00 | 0.00 | C |
| ATOM 2013 N TYR A 908   | 69.308 | 59.093 | 76.075 | 1.00 | 0.00 | N |
| ATOM 2014 CA TYR A 908  | 68.766 | 58.246 | 75.057 | 1.00 | 0.00 | C |
| ATOM 2015 C TYR A 908   | 69.526 | 58.365 | 73.783 | 1.00 | 0.00 | C |
| ATOM 2016 O TYR A 908   | 69.726 | 57.371 | 73.086 | 1.00 | 0.00 | O |
| ATOM 2017 CB TYR A 908  | 67.253 | 58.419 | 74.851 | 1.00 | 0.00 | C |

|      |      |     |     |   |     |        |        |        |      |      |   |
|------|------|-----|-----|---|-----|--------|--------|--------|------|------|---|
| ATOM | 2018 | CG  | TYR | A | 908 | 66.647 | 57.674 | 75.997 | 1.00 | 0.00 | C |
| ATOM | 2019 | CD1 | TYR | A | 908 | 66.348 | 56.336 | 75.864 | 1.00 | 0.00 | C |
| ATOM | 2020 | CD2 | TYR | A | 908 | 66.400 | 58.282 | 77.206 | 1.00 | 0.00 | C |
| ATOM | 2021 | CE1 | TYR | A | 908 | 65.800 | 55.627 | 76.905 | 1.00 | 0.00 | C |
| ATOM | 2022 | CE2 | TYR | A | 908 | 65.850 | 57.584 | 78.253 | 1.00 | 0.00 | C |
| ATOM | 2023 | CZ  | TYR | A | 908 | 65.547 | 56.253 | 78.102 | 1.00 | 0.00 | C |
| ATOM | 2024 | OH  | TYR | A | 908 | 64.982 | 55.528 | 79.172 | 1.00 | 0.00 | O |
| ATOM | 2025 | N   | LEU | A | 909 | 69.946 | 59.580 | 73.391 | 1.00 | 0.00 | N |
| ATOM | 2026 | CA  | LEU | A | 909 | 70.747 | 59.597 | 72.206 | 1.00 | 0.00 | C |
| ATOM | 2027 | C   | LEU | A | 909 | 72.014 | 58.859 | 72.511 | 1.00 | 0.00 | C |
| ATOM | 2028 | O   | LEU | A | 909 | 72.504 | 58.084 | 71.692 | 1.00 | 0.00 | O |
| ATOM | 2029 | CB  | LEU | A | 909 | 71.120 | 61.007 | 71.707 | 1.00 | 0.00 | C |
| ATOM | 2030 | CG  | LEU | A | 909 | 69.986 | 61.735 | 70.959 | 1.00 | 0.00 | C |
| ATOM | 2031 | CD1 | LEU | A | 909 | 69.634 | 60.998 | 69.657 | 1.00 | 0.00 | C |
| ATOM | 2032 | CD2 | LEU | A | 909 | 68.758 | 61.982 | 71.843 | 1.00 | 0.00 | C |
| ATOM | 2033 | N   | ALA | A | 910 | 72.570 | 59.088 | 73.718 | 1.00 | 0.00 | N |
| ATOM | 2034 | CA  | ALA | A | 910 | 73.837 | 58.530 | 74.098 | 1.00 | 0.00 | C |
| ATOM | 2035 | C   | ALA | A | 910 | 73.841 | 57.028 | 74.201 | 1.00 | 0.00 | C |
| ATOM | 2036 | O   | ALA | A | 910 | 74.701 | 56.380 | 73.608 | 1.00 | 0.00 | O |
| ATOM | 2037 | CB  | ALA | A | 910 | 74.326 | 59.081 | 75.449 | 1.00 | 0.00 | C |
| ATOM | 2038 | N   | MET | A | 911 | 72.881 | 56.411 | 74.925 | 1.00 | 0.00 | N |
| ATOM | 2039 | CA  | MET | A | 911 | 72.994 | 54.984 | 75.093 | 1.00 | 0.00 | C |
| ATOM | 2040 | C   | MET | A | 911 | 71.661 | 54.448 | 75.475 | 1.00 | 0.00 | C |
| ATOM | 2041 | O   | MET | A | 911 | 70.627 | 55.054 | 75.211 | 1.00 | 0.00 | O |
| ATOM | 2042 | CB  | MET | A | 911 | 73.921 | 54.535 | 76.238 | 1.00 | 0.00 | C |
| ATOM | 2043 | CG  | MET | A | 911 | 75.400 | 54.901 | 76.097 | 1.00 | 0.00 | C |
| ATOM | 2044 | SD  | MET | A | 911 | 75.816 | 56.617 | 76.520 | 1.00 | 0.00 | S |
| ATOM | 2045 | CE  | MET | A | 911 | 77.605 | 56.318 | 76.600 | 1.00 | 0.00 | C |
| ATOM | 2046 | N   | PHE | A | 912 | 71.650 | 53.240 | 76.074 | 1.00 | 0.00 | N |
| ATOM | 2047 | CA  | PHE | A | 912 | 70.382 | 52.741 | 76.494 | 1.00 | 0.00 | C |
| ATOM | 2048 | C   | PHE | A | 912 | 70.565 | 52.095 | 77.827 | 1.00 | 0.00 | C |
| ATOM | 2049 | O   | PHE | A | 912 | 71.387 | 51.191 | 77.972 | 1.00 | 0.00 | O |
| ATOM | 2050 | CB  | PHE | A | 912 | 69.811 | 51.724 | 75.497 | 1.00 | 0.00 | C |
| ATOM | 2051 | CG  | PHE | A | 912 | 69.742 | 52.479 | 74.213 | 1.00 | 0.00 | C |
| ATOM | 2052 | CD1 | PHE | A | 912 | 70.842 | 52.533 | 73.385 | 1.00 | 0.00 | C |
| ATOM | 2053 | CD2 | PHE | A | 912 | 68.603 | 53.155 | 73.846 | 1.00 | 0.00 | C |
| ATOM | 2054 | CE1 | PHE | A | 912 | 70.802 | 53.234 | 72.205 | 1.00 | 0.00 | C |
| ATOM | 2055 | CE2 | PHE | A | 912 | 68.557 | 53.857 | 72.666 | 1.00 | 0.00 | C |
| ATOM | 2056 | CZ  | PHE | A | 912 | 69.656 | 53.896 | 71.844 | 1.00 | 0.00 | C |
| ATOM | 2057 | N   | GLY | A | 913 | 69.813 | 52.545 | 78.856 | 1.00 | 0.00 | N |
| ATOM | 2058 | CA  | GLY | A | 913 | 68.909 | 53.664 | 78.790 | 1.00 | 0.00 | C |
| ATOM | 2059 | C   | GLY | A | 913 | 69.322 | 54.658 | 79.842 | 1.00 | 0.00 | C |
| ATOM | 2060 | O   | GLY | A | 913 | 70.503 | 54.938 | 80.037 | 1.00 | 0.00 | O |
| ATOM | 2061 | N   | GLN | A | 914 | 68.322 | 55.226 | 80.553 | 1.00 | 0.00 | N |

|      |      |     |           |        |        |        |      |      |   |
|------|------|-----|-----------|--------|--------|--------|------|------|---|
| ATOM | 2062 | CA  | GLN A 914 | 68.553 | 56.168 | 81.617 | 1.00 | 0.00 | C |
| ATOM | 2063 | C   | GLN A 914 | 68.896 | 55.384 | 82.841 | 1.00 | 0.00 | C |
| ATOM | 2064 | O   | GLN A 914 | 68.759 | 54.161 | 82.840 | 1.00 | 0.00 | O |
| ATOM | 2065 | CB  | GLN A 914 | 67.320 | 57.036 | 81.931 | 1.00 | 0.00 | C |
| ATOM | 2066 | CG  | GLN A 914 | 67.484 | 57.959 | 83.139 | 1.00 | 0.00 | C |
| ATOM | 2067 | CD  | GLN A 914 | 68.624 | 58.923 | 82.862 | 1.00 | 0.00 | C |
| ATOM | 2068 | NE2 | GLN A 914 | 69.023 | 59.700 | 83.904 | 1.00 | 0.00 | N |
| ATOM | 2069 | OE1 | GLN A 914 | 69.149 | 58.982 | 81.750 | 1.00 | 0.00 | O |
| ATOM | 2070 | N   | VAL A 915 | 69.434 | 56.061 | 83.884 | 1.00 | 0.00 | N |
| ATOM | 2071 | CA  | VAL A 915 | 69.710 | 55.414 | 85.137 | 1.00 | 0.00 | C |
| ATOM | 2072 | C   | VAL A 915 | 69.042 | 56.170 | 86.256 | 1.00 | 0.00 | C |
| ATOM | 2073 | O   | VAL A 915 | 69.568 | 57.148 | 86.780 | 1.00 | 0.00 | O |
| ATOM | 2074 | CB  | VAL A 915 | 71.180 | 55.314 | 85.441 | 1.00 | 0.00 | C |
| ATOM | 2075 | CG1 | VAL A 915 | 71.805 | 54.273 | 84.498 | 1.00 | 0.00 | C |
| ATOM | 2076 | CG2 | VAL A 915 | 71.812 | 56.703 | 85.270 | 1.00 | 0.00 | C |
| ATOM | 2077 | N   | PRO A 916 | 66.931 | 55.747 | 85.474 | 1.00 | 0.00 | N |
| ATOM | 2078 | CA  | PRO A 916 | 66.313 | 56.429 | 86.580 | 1.00 | 0.00 | C |
| ATOM | 2079 | C   | PRO A 916 | 66.981 | 55.990 | 87.840 | 1.00 | 0.00 | C |
| ATOM | 2080 | O   | PRO A 916 | 67.561 | 54.906 | 87.862 | 1.00 | 0.00 | O |
| ATOM | 2081 | CB  | PRO A 916 | 64.831 | 56.079 | 86.514 | 1.00 | 0.00 | C |
| ATOM | 2082 | CG  | PRO A 916 | 64.587 | 55.819 | 85.017 | 1.00 | 0.00 | C |
| ATOM | 2083 | CD  | PRO A 916 | 65.947 | 55.308 | 84.498 | 1.00 | 0.00 | C |
| ATOM | 2084 | N   | SER A 917 | 66.922 | 56.811 | 88.900 | 1.00 | 0.00 | N |
| ATOM | 2085 | CA  | SER A 917 | 67.543 | 56.387 | 90.116 | 1.00 | 0.00 | C |
| ATOM | 2086 | C   | SER A 917 | 66.763 | 55.206 | 90.585 | 1.00 | 0.00 | C |
| ATOM | 2087 | O   | SER A 917 | 65.647 | 54.965 | 90.127 | 1.00 | 0.00 | O |
| ATOM | 2088 | CB  | SER A 917 | 67.521 | 57.445 | 91.232 | 1.00 | 0.00 | C |
| ATOM | 2089 | OG  | SER A 917 | 68.305 | 58.563 | 90.848 | 1.00 | 0.00 | O |
| ATOM | 2090 | N   | ASP A 918 | 67.334 | 54.443 | 91.533 | 1.00 | 0.00 | N |
| ATOM | 2091 | CA  | ASP A 918 | 66.710 | 53.225 | 91.966 | 1.00 | 0.00 | C |
| ATOM | 2092 | C   | ASP A 918 | 65.327 | 53.513 | 92.445 | 1.00 | 0.00 | C |
| ATOM | 2093 | O   | ASP A 918 | 65.029 | 54.588 | 92.961 | 1.00 | 0.00 | O |
| ATOM | 2094 | CB  | ASP A 918 | 67.469 | 52.503 | 93.093 | 1.00 | 0.00 | C |
| ATOM | 2095 | CG  | ASP A 918 | 68.725 | 51.887 | 92.493 | 1.00 | 0.00 | C |
| ATOM | 2096 | OD1 | ASP A 918 | 68.838 | 51.869 | 91.240 | 1.00 | 0.00 | O |
| ATOM | 2097 | OD2 | ASP A 918 | 69.589 | 51.423 | 93.281 | 1.00 | 0.00 | O |
| ATOM | 2098 | N   | VAL A 919 | 64.436 | 52.518 | 92.260 | 1.00 | 0.00 | N |
| ATOM | 2099 | CA  | VAL A 919 | 63.056 | 52.678 | 92.594 | 1.00 | 0.00 | C |
| ATOM | 2100 | C   | VAL A 919 | 62.885 | 52.483 | 94.060 | 1.00 | 0.00 | C |
| ATOM | 2101 | O   | VAL A 919 | 63.113 | 51.404 | 94.604 | 1.00 | 0.00 | O |
| ATOM | 2102 | CB  | VAL A 919 | 62.163 | 51.720 | 91.854 | 1.00 | 0.00 | C |
| ATOM | 2103 | CG1 | VAL A 919 | 62.612 | 50.279 | 92.154 | 1.00 | 0.00 | C |
| ATOM | 2104 | CG2 | VAL A 919 | 60.708 | 52.013 | 92.246 | 1.00 | 0.00 | C |
| ATOM | 2105 | N   | ASP A 920 | 62.476 | 53.568 | 94.740 | 1.00 | 0.00 | N |

|      |      |     |           |        |        |         |      |      |   |
|------|------|-----|-----------|--------|--------|---------|------|------|---|
| ATOM | 2106 | CA  | ASP A 920 | 62.244 | 53.485 | 96.147  | 1.00 | 0.00 | C |
| ATOM | 2107 | C   | ASP A 920 | 60.823 | 53.086 | 96.299  | 1.00 | 0.00 | C |
| ATOM | 2108 | O   | ASP A 920 | 59.917 | 53.912 | 96.187  | 1.00 | 0.00 | O |
| ATOM | 2109 | CB  | ASP A 920 | 62.402 | 54.824 | 96.882  | 1.00 | 0.00 | C |
| ATOM | 2110 | CG  | ASP A 920 | 62.126 | 54.573 | 98.357  | 1.00 | 0.00 | C |
| ATOM | 2111 | OD1 | ASP A 920 | 62.113 | 53.378 | 98.758  | 1.00 | 0.00 | O |
| ATOM | 2112 | OD2 | ASP A 920 | 61.918 | 55.567 | 99.099  | 1.00 | 0.00 | O |
| ATOM | 2113 | N   | GLY A 921 | 60.585 | 51.793 | 96.550  | 1.00 | 0.00 | N |
| ATOM | 2114 | CA  | GLY A 921 | 59.228 | 51.413 | 96.733  | 1.00 | 0.00 | C |
| ATOM | 2115 | C   | GLY A 921 | 58.868 | 51.996 | 98.050  | 1.00 | 0.00 | C |
| ATOM | 2116 | O   | GLY A 921 | 59.725 | 52.499 | 98.773  | 1.00 | 0.00 | O |
| ATOM | 2117 | N   | THR A 922 | 57.576 | 51.988 | 98.389  | 1.00 | 0.00 | N |
| ATOM | 2118 | CA  | THR A 922 | 57.229 | 52.467 | 99.684  | 1.00 | 0.00 | C |
| ATOM | 2119 | C   | THR A 922 | 57.833 | 51.474 | 100.618 | 1.00 | 0.00 | C |
| ATOM | 2120 | O   | THR A 922 | 58.192 | 51.791 | 101.751 | 1.00 | 0.00 | O |
| ATOM | 2121 | CB  | THR A 922 | 55.752 | 52.503 | 99.932  | 1.00 | 0.00 | C |
| ATOM | 2122 | CG2 | THR A 922 | 55.215 | 51.064 | 99.973  | 1.00 | 0.00 | C |
| ATOM | 2123 | OG1 | THR A 922 | 55.479 | 53.167 | 101.157 | 1.00 | 0.00 | O |
| ATOM | 2124 | N   | THR A 923 | 57.951 | 50.227 | 100.123 | 1.00 | 0.00 | N |
| ATOM | 2125 | CA  | THR A 923 | 58.413 | 49.091 | 100.863 | 1.00 | 0.00 | C |
| ATOM | 2126 | C   | THR A 923 | 59.876 | 49.226 | 101.137 | 1.00 | 0.00 | C |
| ATOM | 2127 | O   | THR A 923 | 60.589 | 49.966 | 100.462 | 1.00 | 0.00 | O |
| ATOM | 2128 | CB  | THR A 923 | 58.201 | 47.816 | 100.100 | 1.00 | 0.00 | C |
| ATOM | 2129 | CG2 | THR A 923 | 58.630 | 46.616 | 100.963 | 1.00 | 0.00 | C |
| ATOM | 2130 | OG1 | THR A 923 | 56.832 | 47.689 | 99.757  | 1.00 | 0.00 | O |
| ATOM | 2131 | N   | TYR A 924 | 60.355 | 48.494 | 102.163 | 1.00 | 0.00 | N |
| ATOM | 2132 | CA  | TYR A 924 | 61.742 | 48.524 | 102.512 | 1.00 | 0.00 | C |
| ATOM | 2133 | C   | TYR A 924 | 62.303 | 47.223 | 102.052 | 1.00 | 0.00 | C |
| ATOM | 2134 | O   | TYR A 924 | 61.862 | 46.154 | 102.471 | 1.00 | 0.00 | O |
| ATOM | 2135 | CB  | TYR A 924 | 61.996 | 48.609 | 104.029 | 1.00 | 0.00 | C |
| ATOM | 2136 | CG  | TYR A 924 | 61.404 | 49.882 | 104.526 | 1.00 | 0.00 | C |
| ATOM | 2137 | CD1 | TYR A 924 | 60.067 | 49.942 | 104.847 | 1.00 | 0.00 | C |
| ATOM | 2138 | CD2 | TYR A 924 | 62.175 | 51.012 | 104.673 | 1.00 | 0.00 | C |
| ATOM | 2139 | CE1 | TYR A 924 | 59.508 | 51.110 | 105.309 | 1.00 | 0.00 | C |
| ATOM | 2140 | CE2 | TYR A 924 | 61.621 | 52.183 | 105.134 | 1.00 | 0.00 | C |
| ATOM | 2141 | CZ  | TYR A 924 | 60.285 | 52.235 | 105.452 | 1.00 | 0.00 | C |
| ATOM | 2142 | OH  | TYR A 924 | 59.714 | 53.435 | 105.925 | 1.00 | 0.00 | O |
| ATOM | 2143 | N   | ASP A 925 | 63.283 | 47.305 | 101.140 | 1.00 | 0.00 | N |
| ATOM | 2144 | CA  | ASP A 925 | 63.902 | 46.151 | 100.580 | 1.00 | 0.00 | C |
| ATOM | 2145 | C   | ASP A 925 | 64.891 | 45.666 | 101.583 | 1.00 | 0.00 | C |
| ATOM | 2146 | O   | ASP A 925 | 65.212 | 46.368 | 102.541 | 1.00 | 0.00 | O |
| ATOM | 2147 | CB  | ASP A 925 | 64.679 | 46.490 | 99.295  | 1.00 | 0.00 | C |
| ATOM | 2148 | CG  | ASP A 925 | 65.153 | 45.220 | 98.610  | 1.00 | 0.00 | C |
| ATOM | 2149 | OD1 | ASP A 925 | 64.603 | 44.131 | 98.918  | 1.00 | 0.00 | O |

|        |      |               |        |        |         |      |      |   |
|--------|------|---------------|--------|--------|---------|------|------|---|
| ATOM   | 2150 | OD2 ASP A 925 | 66.075 | 45.323 | 97.760  | 1.00 | 0.00 | O |
| ATOM   | 2151 | N PHE A 926   | 65.367 | 44.423 | 101.401 | 1.00 | 0.00 | N |
| ATOM   | 2152 | CA PHE A 926  | 66.409 | 43.944 | 102.241 | 1.00 | 0.00 | C |
| ATOM   | 2153 | C PHE A 926   | 67.639 | 44.541 | 101.658 | 1.00 | 0.00 | C |
| ATOM   | 2154 | O PHE A 926   | 67.698 | 44.808 | 100.460 | 1.00 | 0.00 | O |
| ATOM   | 2155 | CB PHE A 926  | 66.529 | 42.409 | 102.279 | 1.00 | 0.00 | C |
| ATOM   | 2156 | CG PHE A 926  | 66.775 | 41.910 | 100.898 | 1.00 | 0.00 | C |
| ATOM   | 2157 | CD1 PHE A 926 | 65.754 | 41.882 | 99.978  | 1.00 | 0.00 | C |
| ATOM   | 2158 | CD2 PHE A 926 | 68.016 | 41.443 | 100.529 | 1.00 | 0.00 | C |
| ATOM   | 2159 | CE1 PHE A 926 | 65.967 | 41.413 | 98.702  | 1.00 | 0.00 | C |
| ATOM   | 2160 | CE2 PHE A 926 | 68.236 | 40.973 | 99.255  | 1.00 | 0.00 | C |
| ATOM   | 2161 | CZ PHE A 926  | 67.212 | 40.960 | 98.338  | 1.00 | 0.00 | C |
| ATOM   | 2162 | N ALA A 927   | 68.654 | 44.799 | 102.497 | 1.00 | 0.00 | N |
| ATOM   | 2163 | CA ALA A 927  | 69.819 | 45.448 | 101.984 | 1.00 | 0.00 | C |
| ATOM   | 2164 | C ALA A 927   | 70.430 | 44.557 | 100.959 | 1.00 | 0.00 | C |
| ATOM   | 2165 | O ALA A 927   | 70.262 | 43.339 | 100.989 | 1.00 | 0.00 | O |
| ATOM   | 2166 | CB ALA A 927  | 70.885 | 45.738 | 103.054 | 1.00 | 0.00 | C |
| HETATM | 2167 | N HIE A 928   | 71.135 | 45.161 | 99.992  | 1.00 | 0.00 | N |
| HETATM | 2168 | CA HIE A 928  | 71.729 | 44.342 | 98.993  | 1.00 | 0.00 | C |
| HETATM | 2169 | C HIE A 928   | 73.010 | 43.833 | 99.545  | 1.00 | 0.00 | C |
| HETATM | 2170 | O HIE A 928   | 73.722 | 44.544 | 100.253 | 1.00 | 0.00 | O |
| HETATM | 2171 | CB HIE A 928  | 72.022 | 45.076 | 97.673  | 1.00 | 0.00 | C |
| HETATM | 2172 | CG HIE A 928  | 72.499 | 44.137 | 96.611  | 1.00 | 0.00 | C |
| HETATM | 2173 | CD2 HIE A 928 | 73.650 | 44.137 | 95.884  | 1.00 | 0.00 | C |
| HETATM | 2174 | ND1 HIE A 928 | 71.776 | 43.052 | 96.178  | 1.00 | 0.00 | N |
| HETATM | 2175 | CE1 HIE A 928 | 72.522 | 42.445 | 95.216  | 1.00 | 0.00 | C |
| HETATM | 2176 | NE2 HIE A 928 | 73.665 | 43.070 | 95.003  | 1.00 | 0.00 | N |
| ATOM   | 2177 | N CYS A 929   | 73.332 | 42.562 | 99.249  | 1.00 | 0.00 | N |
| ATOM   | 2178 | CA CYS A 929  | 74.562 | 42.042 | 99.748  | 1.00 | 0.00 | C |
| ATOM   | 2179 | C CYS A 929   | 75.641 | 42.805 | 99.060  | 1.00 | 0.00 | C |
| ATOM   | 2180 | O CYS A 929   | 75.545 | 43.109 | 97.872  | 1.00 | 0.00 | O |
| ATOM   | 2181 | CB CYS A 929  | 74.745 | 40.533 | 99.492  | 1.00 | 0.00 | C |
| ATOM   | 2182 | SG CYS A 929  | 74.569 | 40.089 | 97.742  | 1.00 | 0.00 | S |
| ATOM   | 2183 | N THR A 930   | 76.702 | 43.150 | 99.809  | 1.00 | 0.00 | N |
| ATOM   | 2184 | CA THR A 930  | 77.725 | 43.987 | 99.263  | 1.00 | 0.00 | C |
| ATOM   | 2185 | C THR A 930   | 78.356 | 43.308 | 98.092  | 1.00 | 0.00 | C |
| ATOM   | 2186 | O THR A 930   | 78.524 | 43.922 | 97.039  | 1.00 | 0.00 | O |
| ATOM   | 2187 | CB THR A 930  | 78.790 | 44.345 | 100.260 | 1.00 | 0.00 | C |
| ATOM   | 2188 | CG2 THR A 930 | 79.538 | 43.076 | 100.708 | 1.00 | 0.00 | C |
| ATOM   | 2189 | OG1 THR A 930 | 79.692 | 45.281 | 99.690  | 1.00 | 0.00 | O |
| ATOM   | 2190 | N PHE A 931   | 78.705 | 42.016 | 98.224  | 1.00 | 0.00 | N |
| ATOM   | 2191 | CA PHE A 931  | 79.303 | 41.358 | 97.107  | 1.00 | 0.00 | C |
| ATOM   | 2192 | C PHE A 931   | 78.190 | 41.114 | 96.149  | 1.00 | 0.00 | C |
| ATOM   | 2193 | O PHE A 931   | 77.054 | 40.884 | 96.559  | 1.00 | 0.00 | O |



|      |      |     |           |        |        |         |      |      |   |
|------|------|-----|-----------|--------|--------|---------|------|------|---|
| ATOM | 2194 | CB  | PHE A 931 | 79.950 | 40.012 | 97.477  | 1.00 | 0.00 | C |
| ATOM | 2195 | CG  | PHE A 931 | 81.023 | 40.330 | 98.459  | 1.00 | 0.00 | C |
| ATOM | 2196 | CD1 | PHE A 931 | 80.719 | 40.491 | 99.789  | 1.00 | 0.00 | C |
| ATOM | 2197 | CD2 | PHE A 931 | 82.331 | 40.476 | 98.054  | 1.00 | 0.00 | C |
| ATOM | 2198 | CE1 | PHE A 931 | 81.700 | 40.791 | 100.708 | 1.00 | 0.00 | C |
| ATOM | 2199 | CE2 | PHE A 931 | 83.315 | 40.775 | 98.969  | 1.00 | 0.00 | C |
| ATOM | 2200 | CZ  | PHE A 931 | 83.003 | 40.932 | 100.296 | 1.00 | 0.00 | C |
| ATOM | 2201 | N   | THR A 932 | 78.475 | 41.190 | 94.839  | 1.00 | 0.00 | N |
| ATOM | 2202 | CA  | THR A 932 | 77.417 | 40.997 | 93.892  | 1.00 | 0.00 | C |
| ATOM | 2203 | C   | THR A 932 | 77.320 | 39.536 | 93.607  | 1.00 | 0.00 | C |
| ATOM | 2204 | O   | THR A 932 | 77.956 | 38.722 | 94.277  | 1.00 | 0.00 | O |
| ATOM | 2205 | CB  | THR A 932 | 77.632 | 41.724 | 92.594  | 1.00 | 0.00 | C |
| ATOM | 2206 | CG2 | THR A 932 | 77.741 | 43.230 | 92.888  | 1.00 | 0.00 | C |
| ATOM | 2207 | OG1 | THR A 932 | 78.807 | 41.260 | 91.953  | 1.00 | 0.00 | O |
| ATOM | 2208 | N   | GLY A 933 | 76.478 | 39.168 | 92.623  | 1.00 | 0.00 | N |
| ATOM | 2209 | CA  | GLY A 933 | 76.312 | 37.790 | 92.264  | 1.00 | 0.00 | C |
| ATOM | 2210 | C   | GLY A 933 | 76.078 | 37.741 | 90.787  | 1.00 | 0.00 | C |
| ATOM | 2211 | O   | GLY A 933 | 75.633 | 38.719 | 90.189  | 1.00 | 0.00 | O |
| ATOM | 2212 | N   | ASN A 934 | 76.380 | 36.584 | 90.160  | 1.00 | 0.00 | N |
| ATOM | 2213 | CA  | ASN A 934 | 76.255 | 36.477 | 88.735  | 1.00 | 0.00 | C |
| ATOM | 2214 | C   | ASN A 934 | 74.823 | 36.652 | 88.328  | 1.00 | 0.00 | C |
| ATOM | 2215 | O   | ASN A 934 | 74.497 | 37.553 | 87.556  | 1.00 | 0.00 | O |
| ATOM | 2216 | CB  | ASN A 934 | 76.713 | 35.104 | 88.210  | 1.00 | 0.00 | C |
| ATOM | 2217 | CG  | ASN A 934 | 76.797 | 35.165 | 86.690  | 1.00 | 0.00 | C |
| ATOM | 2218 | ND2 | ASN A 934 | 75.715 | 35.685 | 86.049  | 1.00 | 0.00 | N |
| ATOM | 2219 | OD1 | ASN A 934 | 77.787 | 34.754 | 86.088  | 1.00 | 0.00 | O |
| ATOM | 2220 | N   | GLU A 935 | 73.912 | 35.822 | 88.868  | 1.00 | 0.00 | N |
| ATOM | 2221 | CA  | GLU A 935 | 72.547 | 35.958 | 88.454  | 1.00 | 0.00 | C |
| ATOM | 2222 | C   | GLU A 935 | 71.777 | 36.391 | 89.649  | 1.00 | 0.00 | C |
| ATOM | 2223 | O   | GLU A 935 | 72.148 | 36.081 | 90.780  | 1.00 | 0.00 | O |
| ATOM | 2224 | CB  | GLU A 935 | 71.907 | 34.660 | 87.940  | 1.00 | 0.00 | C |
| ATOM | 2225 | CG  | GLU A 935 | 70.496 | 34.889 | 87.390  | 1.00 | 0.00 | C |
| ATOM | 2226 | CD  | GLU A 935 | 69.961 | 33.556 | 86.889  | 1.00 | 0.00 | C |
| ATOM | 2227 | OE1 | GLU A 935 | 70.763 | 32.780 | 86.302  | 1.00 | 0.00 | O |
| ATOM | 2228 | OE2 | GLU A 935 | 68.747 | 33.298 | 87.087  | 1.00 | 0.00 | O |
| ATOM | 2229 | N   | SER A 936 | 70.687 | 37.145 | 89.426  | 1.00 | 0.00 | N |
| ATOM | 2230 | CA  | SER A 936 | 69.951 | 37.612 | 90.558  | 1.00 | 0.00 | C |
| ATOM | 2231 | C   | SER A 936 | 68.496 | 37.501 | 90.254  | 1.00 | 0.00 | C |
| ATOM | 2232 | O   | SER A 936 | 68.094 | 37.356 | 89.099  | 1.00 | 0.00 | O |
| ATOM | 2233 | CB  | SER A 936 | 70.241 | 39.085 | 90.890  | 1.00 | 0.00 | C |
| ATOM | 2234 | OG  | SER A 936 | 69.489 | 39.498 | 92.021  | 1.00 | 0.00 | O |
| ATOM | 2235 | N   | LYS A 937 | 67.663 | 37.516 | 91.314  | 1.00 | 0.00 | N |
| ATOM | 2236 | CA  | LYS A 937 | 66.248 | 37.499 | 91.098  | 1.00 | 0.00 | C |
| ATOM | 2237 | C   | LYS A 937 | 65.671 | 38.593 | 91.945  | 1.00 | 0.00 | C |

|      |      |     |           |        |        |        |      |      |     |
|------|------|-----|-----------|--------|--------|--------|------|------|-----|
| ATOM | 2238 | O   | LYS A 937 | 65.421 | 38.436 | 93.138 | 1.00 | 0.00 | O   |
| ATOM | 2239 | CB  | LYS A 937 | 65.591 | 36.170 | 91.502 | 1.00 | 0.00 | C   |
| ATOM | 2240 | CG  | LYS A 937 | 66.047 | 34.999 | 90.628 | 1.00 | 0.00 | C   |
| ATOM | 2241 | CD  | LYS A 937 | 65.738 | 35.189 | 89.143 | 1.00 | 0.00 | C   |
| ATOM | 2242 | CE  | LYS A 937 | 66.183 | 34.017 | 88.262 | 1.00 | 0.00 | C   |
| ATOM | 2243 | NZ  | LYS A 937 | 65.843 | 34.287 | 86.848 | 1.00 | 0.00 | NI+ |
| ATOM | 2244 | N   | PRO A 938 | 65.462 | 39.711 | 91.313 | 1.00 | 0.00 | N   |
| ATOM | 2245 | CA  | PRO A 938 | 64.900 | 40.868 | 91.958 | 1.00 | 0.00 | C   |
| ATOM | 2246 | C   | PRO A 938 | 63.416 | 40.724 | 92.053 | 1.00 | 0.00 | C   |
| ATOM | 2247 | O   | PRO A 938 | 62.887 | 39.702 | 91.626 | 1.00 | 0.00 | O   |
| ATOM | 2248 | CB  | PRO A 938 | 65.340 | 42.080 | 91.129 | 1.00 | 0.00 | C   |
| ATOM | 2249 | CG  | PRO A 938 | 65.850 | 41.487 | 89.808 | 1.00 | 0.00 | C   |
| ATOM | 2250 | CD  | PRO A 938 | 66.323 | 40.081 | 90.203 | 1.00 | 0.00 | C   |
| ATOM | 2251 | N   | LEU A 939 | 62.728 | 41.737 | 92.609 | 1.00 | 0.00 | N   |
| ATOM | 2252 | CA  | LEU A 939 | 61.311 | 41.659 | 92.802 | 1.00 | 0.00 | C   |
| ATOM | 2253 | C   | LEU A 939 | 60.628 | 41.603 | 91.477 | 1.00 | 0.00 | C   |
| ATOM | 2254 | O   | LEU A 939 | 60.823 | 42.456 | 90.611 | 1.00 | 0.00 | O   |
| ATOM | 2255 | CB  | LEU A 939 | 60.760 | 42.849 | 93.598 | 1.00 | 0.00 | C   |
| ATOM | 2256 | CG  | LEU A 939 | 61.344 | 42.924 | 95.021 | 1.00 | 0.00 | C   |
| ATOM | 2257 | CD1 | LEU A 939 | 62.856 | 43.201 | 95.013 | 1.00 | 0.00 | C   |
| ATOM | 2258 | CD2 | LEU A 939 | 60.579 | 43.937 | 95.871 | 1.00 | 0.00 | C   |
| ATOM | 2259 | N   | CYS A 940 | 59.779 | 40.572 | 91.308 | 1.00 | 0.00 | N   |
| ATOM | 2260 | CA  | CYS A 940 | 59.108 | 40.405 | 90.060 | 1.00 | 0.00 | C   |
| ATOM | 2261 | C   | CYS A 940 | 58.185 | 41.526 | 89.894 | 1.00 | 0.00 | C   |
| ATOM | 2262 | O   | CYS A 940 | 57.374 | 41.857 | 90.755 | 1.00 | 0.00 | O   |
| ATOM | 2263 | CB  | CYS A 940 | 58.287 | 39.113 | 89.935 | 1.00 | 0.00 | C   |
| ATOM | 2264 | SG  | CYS A 940 | 59.347 | 37.648 | 89.797 | 1.00 | 0.00 | S   |
| ATOM | 2265 | N   | VAL A 941 | 58.305 | 42.155 | 88.735 | 1.00 | 0.00 | N   |
| ATOM | 2266 | CA  | VAL A 941 | 57.435 | 43.242 | 88.526 | 1.00 | 0.00 | C   |
| ATOM | 2267 | C   | VAL A 941 | 56.952 | 43.091 | 87.135 | 1.00 | 0.00 | C   |
| ATOM | 2268 | O   | VAL A 941 | 57.494 | 42.317 | 86.349 | 1.00 | 0.00 | O   |
| ATOM | 2269 | CB  | VAL A 941 | 58.132 | 44.554 | 88.674 | 1.00 | 0.00 | C   |
| ATOM | 2270 | CG1 | VAL A 941 | 58.647 | 44.649 | 90.122 | 1.00 | 0.00 | C   |
| ATOM | 2271 | CG2 | VAL A 941 | 59.246 | 44.637 | 87.619 | 1.00 | 0.00 | C   |
| ATOM | 2272 | N   | GLU A 942 | 55.844 | 43.772 | 86.822 | 1.00 | 0.00 | N   |
| ATOM | 2273 | CA  | GLU A 942 | 55.356 | 43.722 | 85.487 | 1.00 | 0.00 | C   |
| ATOM | 2274 | C   | GLU A 942 | 56.312 | 44.480 | 84.613 | 1.00 | 0.00 | C   |
| ATOM | 2275 | O   | GLU A 942 | 56.518 | 44.122 | 83.455 | 1.00 | 0.00 | O   |
| ATOM | 2276 | CB  | GLU A 942 | 53.962 | 44.345 | 85.324 | 1.00 | 0.00 | C   |
| ATOM | 2277 | CG  | GLU A 942 | 53.445 | 44.272 | 83.889 | 1.00 | 0.00 | C   |
| ATOM | 2278 | CD  | GLU A 942 | 52.003 | 44.763 | 83.876 | 1.00 | 0.00 | C   |
| ATOM | 2279 | OE1 | GLU A 942 | 51.425 | 44.924 | 84.982 | 1.00 | 0.00 | O   |
| ATOM | 2280 | OE2 | GLU A 942 | 51.465 | 44.981 | 82.757 | 1.00 | 0.00 | O   |
| ATOM | 2281 | N   | LEU A 943 | 56.909 | 45.562 | 85.165 | 1.00 | 0.00 | N   |

|        |      |     |           |        |        |        |      |      |   |
|--------|------|-----|-----------|--------|--------|--------|------|------|---|
| ATOM   | 2282 | CA  | LEU A 943 | 57.772 | 46.467 | 84.440 | 1.00 | 0.00 | C |
| ATOM   | 2283 | C   | LEU A 943 | 59.206 | 45.996 | 84.413 | 1.00 | 0.00 | C |
| ATOM   | 2284 | O   | LEU A 943 | 59.513 | 44.912 | 84.902 | 1.00 | 0.00 | O |
| ATOM   | 2285 | CB  | LEU A 943 | 57.719 | 47.907 | 84.972 | 1.00 | 0.00 | C |
| ATOM   | 2286 | CG  | LEU A 943 | 56.349 | 48.562 | 84.720 | 1.00 | 0.00 | C |
| ATOM   | 2287 | CD1 | LEU A 943 | 55.231 | 47.817 | 85.462 | 1.00 | 0.00 | C |
| ATOM   | 2288 | CD2 | LEU A 943 | 56.377 | 50.066 | 85.035 | 1.00 | 0.00 | C |
| ATOM   | 2289 | N   | ASP A 944 | 60.108 | 46.793 | 83.772 | 1.00 | 0.00 | N |
| ATOM   | 2290 | CA  | ASP A 944 | 61.506 | 46.457 | 83.559 | 1.00 | 0.00 | C |
| ATOM   | 2291 | C   | ASP A 944 | 62.455 | 47.306 | 84.398 | 1.00 | 0.00 | C |
| ATOM   | 2292 | O   | ASP A 944 | 62.022 | 47.979 | 85.334 | 1.00 | 0.00 | O |
| ATOM   | 2293 | CB  | ASP A 944 | 61.930 | 46.622 | 82.093 | 1.00 | 0.00 | C |
| ATOM   | 2294 | CG  | ASP A 944 | 61.163 | 45.594 | 81.273 | 1.00 | 0.00 | C |
| ATOM   | 2295 | OD1 | ASP A 944 | 61.092 | 44.412 | 81.710 | 1.00 | 0.00 | O |
| ATOM   | 2296 | OD2 | ASP A 944 | 60.639 | 45.975 | 80.191 | 1.00 | 0.00 | O |
| ATOM   | 2297 | N   | GLU A 945 | 63.795 | 47.248 | 84.102 | 1.00 | 0.00 | N |
| ATOM   | 2298 | CA  | GLU A 945 | 64.814 | 48.008 | 84.811 | 1.00 | 0.00 | C |
| ATOM   | 2299 | C   | GLU A 945 | 66.190 | 47.719 | 84.223 | 1.00 | 0.00 | C |
| ATOM   | 2300 | O   | GLU A 945 | 66.298 | 47.185 | 83.122 | 1.00 | 0.00 | O |
| ATOM   | 2301 | CB  | GLU A 945 | 64.843 | 47.710 | 86.320 | 1.00 | 0.00 | C |
| ATOM   | 2302 | CG  | GLU A 945 | 65.641 | 48.733 | 87.129 | 1.00 | 0.00 | C |
| ATOM   | 2303 | CD  | GLU A 945 | 65.530 | 48.363 | 88.599 | 1.00 | 0.00 | C |
| ATOM   | 2304 | OE1 | GLU A 945 | 64.826 | 47.362 | 88.906 | 1.00 | 0.00 | O |
| ATOM   | 2305 | OE2 | GLU A 945 | 66.142 | 49.074 | 89.439 | 1.00 | 0.00 | O |
| HETATM | 2306 | N   | HIE A 946 | 67.300 | 48.113 | 84.913 | 1.00 | 0.00 | N |
| HETATM | 2307 | CA  | HIE A 946 | 68.618 | 47.838 | 84.382 | 1.00 | 0.00 | C |
| HETATM | 2308 | C   | HIE A 946 | 69.465 | 47.206 | 85.446 | 1.00 | 0.00 | C |
| HETATM | 2309 | O   | HIE A 946 | 69.362 | 47.542 | 86.625 | 1.00 | 0.00 | O |
| HETATM | 2310 | CB  | HIE A 946 | 69.374 | 49.082 | 83.890 | 1.00 | 0.00 | C |
| HETATM | 2311 | CG  | HIE A 946 | 69.886 | 49.933 | 85.009 | 1.00 | 0.00 | C |
| HETATM | 2312 | CD2 | HIE A 946 | 71.145 | 50.033 | 85.524 | 1.00 | 0.00 | C |
| HETATM | 2313 | ND1 | HIE A 946 | 69.112 | 50.802 | 85.738 | 1.00 | 0.00 | N |
| HETATM | 2314 | CE1 | HIE A 946 | 69.930 | 51.385 | 86.653 | 1.00 | 0.00 | C |
| HETATM | 2315 | NE2 | HIE A 946 | 71.173 | 50.950 | 86.560 | 1.00 | 0.00 | N |
| ATOM   | 2316 | N   | ASN A 947 | 70.341 | 46.260 | 85.047 | 1.00 | 0.00 | N |
| ATOM   | 2317 | CA  | ASN A 947 | 71.172 | 45.583 | 86.005 | 1.00 | 0.00 | C |
| ATOM   | 2318 | C   | ASN A 947 | 72.486 | 45.275 | 85.367 | 1.00 | 0.00 | C |
| ATOM   | 2319 | O   | ASN A 947 | 72.818 | 45.765 | 84.292 | 1.00 | 0.00 | O |
| ATOM   | 2320 | CB  | ASN A 947 | 70.593 | 44.238 | 86.483 | 1.00 | 0.00 | C |
| ATOM   | 2321 | CG  | ASN A 947 | 69.358 | 44.515 | 87.331 | 1.00 | 0.00 | C |
| ATOM   | 2322 | ND2 | ASN A 947 | 68.288 | 43.699 | 87.126 | 1.00 | 0.00 | N |
| ATOM   | 2323 | OD1 | ASN A 947 | 69.341 | 45.428 | 88.151 | 1.00 | 0.00 | O |
| ATOM   | 2324 | N   | LEU A 948 | 73.285 | 44.456 | 86.074 | 1.00 | 0.00 | N |
| ATOM   | 2325 | CA  | LEU A 948 | 74.572 | 44.011 | 85.627 | 1.00 | 0.00 | C |

|      |      |     |           |        |        |        |      |      |   |
|------|------|-----|-----------|--------|--------|--------|------|------|---|
| ATOM | 2326 | C   | LEU A 948 | 74.373 | 43.171 | 84.394 | 1.00 | 0.00 | C |
| ATOM | 2327 | O   | LEU A 948 | 75.165 | 43.279 | 83.455 | 1.00 | 0.00 | O |
| ATOM | 2328 | CB  | LEU A 948 | 75.266 | 43.121 | 86.672 | 1.00 | 0.00 | C |
| ATOM | 2329 | CG  | LEU A 948 | 75.461 | 43.796 | 88.040 | 1.00 | 0.00 | C |
| ATOM | 2330 | CD1 | LEU A 948 | 76.158 | 42.844 | 89.017 | 1.00 | 0.00 | C |
| ATOM | 2331 | CD2 | LEU A 948 | 76.200 | 45.138 | 87.916 | 1.00 | 0.00 | C |
| ATOM | 2332 | N   | PRO A 949 | 73.357 | 42.339 | 84.343 | 1.00 | 0.00 | N |
| ATOM | 2333 | CA  | PRO A 949 | 73.174 | 41.529 | 83.169 | 1.00 | 0.00 | C |
| ATOM | 2334 | C   | PRO A 949 | 72.745 | 42.351 | 82.005 | 1.00 | 0.00 | C |
| ATOM | 2335 | O   | PRO A 949 | 72.250 | 43.460 | 82.203 | 1.00 | 0.00 | O |
| ATOM | 2336 | CB  | PRO A 949 | 72.168 | 40.446 | 83.551 | 1.00 | 0.00 | C |
| ATOM | 2337 | CG  | PRO A 949 | 72.396 | 40.264 | 85.061 | 1.00 | 0.00 | C |
| ATOM | 2338 | CD  | PRO A 949 | 72.886 | 41.643 | 85.536 | 1.00 | 0.00 | C |
| ATOM | 2339 | N   | ARG A 950 | 72.947 | 41.826 | 80.779 | 1.00 | 0.00 | N |
| ATOM | 2340 | CA  | ARG A 950 | 72.599 | 42.556 | 79.600 | 1.00 | 0.00 | C |
| ATOM | 2341 | C   | ARG A 950 | 71.257 | 42.096 | 79.127 | 1.00 | 0.00 | C |
| ATOM | 2342 | O   | ARG A 950 | 71.141 | 41.150 | 78.346 | 1.00 | 0.00 | O |
| ATOM | 2343 | CB  | ARG A 950 | 73.601 | 42.314 | 78.465 | 1.00 | 0.00 | C |
| ATOM | 2344 | CG  | ARG A 950 | 73.184 | 42.901 | 77.117 | 1.00 | 0.00 | C |
| ATOM | 2345 | CD  | ARG A 950 | 74.217 | 42.635 | 76.020 | 1.00 | 0.00 | C |
| ATOM | 2346 | NE  | ARG A 950 | 73.576 | 42.968 | 74.716 | 1.00 | 0.00 | N |
| ATOM | 2347 | CZ  | ARG A 950 | 73.543 | 44.260 | 74.286 | 1.00 | 0.00 | C |
| ATOM | 2348 | NH1 | ARG A 950 | 74.053 | 45.254 | 75.071 | 1.00 | 0.00 | N |
| ATOM | 2349 | NH2 | ARG A 950 | 72.997 | 44.560 | 73.073 | 1.00 | 0.00 | N |
| ATOM | 2350 | N   | PHE A 951 | 70.206 | 42.773 | 79.618 | 1.00 | 0.00 | N |
| ATOM | 2351 | CA  | PHE A 951 | 68.841 | 42.564 | 79.231 | 1.00 | 0.00 | C |
| ATOM | 2352 | C   | PHE A 951 | 68.666 | 43.056 | 77.816 | 1.00 | 0.00 | C |
| ATOM | 2353 | O   | PHE A 951 | 67.979 | 42.419 | 77.017 | 1.00 | 0.00 | O |
| ATOM | 2354 | CB  | PHE A 951 | 67.858 | 43.354 | 80.112 | 1.00 | 0.00 | C |
| ATOM | 2355 | CG  | PHE A 951 | 68.066 | 42.911 | 81.518 | 1.00 | 0.00 | C |
| ATOM | 2356 | CD1 | PHE A 951 | 67.418 | 41.805 | 82.011 | 1.00 | 0.00 | C |
| ATOM | 2357 | CD2 | PHE A 951 | 68.922 | 43.612 | 82.340 | 1.00 | 0.00 | C |
| ATOM | 2358 | CE1 | PHE A 951 | 67.620 | 41.404 | 83.312 | 1.00 | 0.00 | C |
| ATOM | 2359 | CE2 | PHE A 951 | 69.127 | 43.210 | 83.640 | 1.00 | 0.00 | C |
| ATOM | 2360 | CZ  | PHE A 951 | 68.474 | 42.106 | 84.127 | 1.00 | 0.00 | C |
| ATOM | 2361 | N   | PRO A 952 | 69.273 | 44.168 | 77.466 | 1.00 | 0.00 | N |
| ATOM | 2362 | CA  | PRO A 952 | 69.113 | 44.670 | 76.129 | 1.00 | 0.00 | C |
| ATOM | 2363 | C   | PRO A 952 | 69.694 | 43.751 | 75.113 | 1.00 | 0.00 | C |
| ATOM | 2364 | O   | PRO A 952 | 69.585 | 44.040 | 73.924 | 1.00 | 0.00 | O |
| ATOM | 2365 | CB  | PRO A 952 | 69.710 | 46.075 | 76.130 | 1.00 | 0.00 | C |
| ATOM | 2366 | CG  | PRO A 952 | 69.455 | 46.560 | 77.564 | 1.00 | 0.00 | C |
| ATOM | 2367 | CD  | PRO A 952 | 69.454 | 45.273 | 78.405 | 1.00 | 0.00 | C |
| ATOM | 2368 | N   | GLU A 953 | 70.339 | 42.658 | 75.535 | 1.00 | 0.00 | N |
| ATOM | 2369 | CA  | GLU A 953 | 70.871 | 41.768 | 74.549 | 1.00 | 0.00 | C |

|      |      |     |           |        |        |        |      |      |   |
|------|------|-----|-----------|--------|--------|--------|------|------|---|
| ATOM | 2370 | C   | GLU A 953 | 69.713 | 41.262 | 73.742 | 1.00 | 0.00 | C |
| ATOM | 2371 | O   | GLU A 953 | 69.814 | 41.119 | 72.527 | 1.00 | 0.00 | O |
| ATOM | 2372 | CB  | GLU A 953 | 71.588 | 40.556 | 75.163 | 1.00 | 0.00 | C |
| ATOM | 2373 | CG  | GLU A 953 | 72.403 | 39.743 | 74.151 | 1.00 | 0.00 | C |
| ATOM | 2374 | CD  | GLU A 953 | 71.447 | 38.926 | 73.294 | 1.00 | 0.00 | C |
| ATOM | 2375 | OE1 | GLU A 953 | 70.580 | 38.220 | 73.878 | 1.00 | 0.00 | O |
| ATOM | 2376 | OE2 | GLU A 953 | 71.565 | 39.002 | 72.042 | 1.00 | 0.00 | O |
| ATOM | 2377 | N   | TRP A 954 | 68.573 | 40.978 | 74.404 | 1.00 | 0.00 | N |
| ATOM | 2378 | CA  | TRP A 954 | 67.413 | 40.442 | 73.749 | 1.00 | 0.00 | C |
| ATOM | 2379 | C   | TRP A 954 | 66.862 | 41.403 | 72.739 | 1.00 | 0.00 | C |
| ATOM | 2380 | O   | TRP A 954 | 66.512 | 41.010 | 71.628 | 1.00 | 0.00 | O |
| ATOM | 2381 | CB  | TRP A 954 | 66.270 | 40.115 | 74.727 | 1.00 | 0.00 | C |
| ATOM | 2382 | CG  | TRP A 954 | 64.975 | 39.752 | 74.041 | 1.00 | 0.00 | C |
| ATOM | 2383 | CD1 | TRP A 954 | 63.858 | 40.512 | 73.858 | 1.00 | 0.00 | C |
| ATOM | 2384 | CD2 | TRP A 954 | 64.715 | 38.490 | 73.402 | 1.00 | 0.00 | C |
| ATOM | 2385 | CE2 | TRP A 954 | 63.431 | 38.560 | 72.863 | 1.00 | 0.00 | C |
| ATOM | 2386 | CE3 | TRP A 954 | 65.485 | 37.372 | 73.272 | 1.00 | 0.00 | C |
| ATOM | 2387 | NE1 | TRP A 954 | 62.914 | 39.805 | 73.153 | 1.00 | 0.00 | N |
| ATOM | 2388 | CZ2 | TRP A 954 | 62.893 | 37.507 | 72.182 | 1.00 | 0.00 | C |
| ATOM | 2389 | CZ3 | TRP A 954 | 64.939 | 36.307 | 72.589 | 1.00 | 0.00 | C |
| ATOM | 2390 | CH2 | TRP A 954 | 63.668 | 36.375 | 72.054 | 1.00 | 0.00 | C |
| ATOM | 2391 | N   | ILE A 955 | 66.800 | 42.700 | 73.088 | 1.00 | 0.00 | N |
| ATOM | 2392 | CA  | ILE A 955 | 66.193 | 43.694 | 72.248 | 1.00 | 0.00 | C |
| ATOM | 2393 | C   | ILE A 955 | 66.921 | 43.750 | 70.946 | 1.00 | 0.00 | C |
| ATOM | 2394 | O   | ILE A 955 | 66.346 | 44.111 | 69.923 | 1.00 | 0.00 | O |
| ATOM | 2395 | CB  | ILE A 955 | 66.187 | 45.085 | 72.820 | 1.00 | 0.00 | C |
| ATOM | 2396 | CG1 | ILE A 955 | 67.607 | 45.656 | 72.947 | 1.00 | 0.00 | C |
| ATOM | 2397 | CG2 | ILE A 955 | 65.416 | 45.034 | 74.147 | 1.00 | 0.00 | C |
| ATOM | 2398 | CD1 | ILE A 955 | 67.630 | 47.158 | 73.223 | 1.00 | 0.00 | C |
| ATOM | 2399 | N   | THR A 956 | 68.216 | 43.390 | 70.953 | 1.00 | 0.00 | N |
| ATOM | 2400 | CA  | THR A 956 | 69.052 | 43.546 | 69.801 | 1.00 | 0.00 | C |
| ATOM | 2401 | C   | THR A 956 | 68.425 | 42.884 | 68.620 | 1.00 | 0.00 | C |
| ATOM | 2402 | O   | THR A 956 | 68.562 | 43.394 | 67.514 | 1.00 | 0.00 | O |
| ATOM | 2403 | CB  | THR A 956 | 70.410 | 42.933 | 69.961 | 1.00 | 0.00 | C |
| ATOM | 2404 | CG2 | THR A 956 | 71.046 | 43.484 | 71.249 | 1.00 | 0.00 | C |
| ATOM | 2405 | OG1 | THR A 956 | 70.309 | 41.520 | 70.030 | 1.00 | 0.00 | O |
| ATOM | 2406 | N   | ILE A 957 | 67.740 | 41.739 | 68.777 | 1.00 | 0.00 | N |
| ATOM | 2407 | CA  | ILE A 957 | 67.206 | 41.170 | 67.572 | 1.00 | 0.00 | C |
| ATOM | 2408 | C   | ILE A 957 | 66.217 | 42.105 | 66.925 | 1.00 | 0.00 | C |
| ATOM | 2409 | O   | ILE A 957 | 66.278 | 42.238 | 65.702 | 1.00 | 0.00 | O |
| ATOM | 2410 | CB  | ILE A 957 | 66.744 | 39.724 | 67.681 | 1.00 | 0.00 | C |
| ATOM | 2411 | CG1 | ILE A 957 | 65.677 | 39.457 | 68.756 | 1.00 | 0.00 | C |
| ATOM | 2412 | CG2 | ILE A 957 | 68.010 | 38.877 | 67.879 | 1.00 | 0.00 | C |
| ATOM | 2413 | CD1 | ILE A 957 | 65.051 | 38.065 | 68.665 | 1.00 | 0.00 | C |

|      |      |     |           |        |        |        |      |      |   |
|------|------|-----|-----------|--------|--------|--------|------|------|---|
| ATOM | 2414 | N   | PRO A 958 | 65.309 | 42.784 | 67.591 | 1.00 | 0.00 | N |
| ATOM | 2415 | CA  | PRO A 958 | 64.508 | 43.733 | 66.866 | 1.00 | 0.00 | C |
| ATOM | 2416 | C   | PRO A 958 | 65.355 | 44.900 | 66.482 | 1.00 | 0.00 | C |
| ATOM | 2417 | O   | PRO A 958 | 65.018 | 45.604 | 65.530 | 1.00 | 0.00 | O |
| ATOM | 2418 | CB  | PRO A 958 | 63.348 | 44.103 | 67.787 | 1.00 | 0.00 | C |
| ATOM | 2419 | CG  | PRO A 958 | 63.178 | 42.855 | 68.668 | 1.00 | 0.00 | C |
| ATOM | 2420 | CD  | PRO A 958 | 64.587 | 42.251 | 68.738 | 1.00 | 0.00 | C |
| ATOM | 2421 | N   | LEU A 959 | 66.456 | 45.121 | 67.225 | 1.00 | 0.00 | N |
| ATOM | 2422 | CA  | LEU A 959 | 67.341 | 46.216 | 66.983 | 1.00 | 0.00 | C |
| ATOM | 2423 | C   | LEU A 959 | 67.931 | 45.984 | 65.631 | 1.00 | 0.00 | C |
| ATOM | 2424 | O   | LEU A 959 | 68.181 | 46.920 | 64.873 | 1.00 | 0.00 | O |
| ATOM | 2425 | CB  | LEU A 959 | 68.474 | 46.300 | 68.019 | 1.00 | 0.00 | C |
| ATOM | 2426 | CG  | LEU A 959 | 69.347 | 47.568 | 67.906 | 1.00 | 0.00 | C |
| ATOM | 2427 | CD1 | LEU A 959 | 70.197 | 47.580 | 66.629 | 1.00 | 0.00 | C |
| ATOM | 2428 | CD2 | LEU A 959 | 68.494 | 48.836 | 68.074 | 1.00 | 0.00 | C |
| ATOM | 2429 | N   | VAL A 960 | 68.154 | 44.701 | 65.303 | 1.00 | 0.00 | N |
| ATOM | 2430 | CA  | VAL A 960 | 68.716 | 44.295 | 64.054 | 1.00 | 0.00 | C |
| ATOM | 2431 | C   | VAL A 960 | 67.812 | 44.826 | 63.001 | 1.00 | 0.00 | C |
| ATOM | 2432 | O   | VAL A 960 | 68.262 | 45.368 | 61.994 | 1.00 | 0.00 | O |
| ATOM | 2433 | CB  | VAL A 960 | 68.733 | 42.796 | 63.916 | 1.00 | 0.00 | C |
| ATOM | 2434 | CG1 | VAL A 960 | 69.113 | 42.418 | 62.474 | 1.00 | 0.00 | C |
| ATOM | 2435 | CG2 | VAL A 960 | 69.678 | 42.223 | 64.985 | 1.00 | 0.00 | C |
| ATOM | 2436 | N   | CYS A 961 | 66.496 | 44.696 | 63.231 | 1.00 | 0.00 | N |
| ATOM | 2437 | CA  | CYS A 961 | 65.544 | 45.179 | 62.285 | 1.00 | 0.00 | C |
| ATOM | 2438 | C   | CYS A 961 | 65.718 | 46.656 | 62.174 | 1.00 | 0.00 | C |
| ATOM | 2439 | O   | CYS A 961 | 65.634 | 47.229 | 61.087 | 1.00 | 0.00 | O |
| ATOM | 2440 | CB  | CYS A 961 | 64.092 | 44.916 | 62.709 | 1.00 | 0.00 | C |
| ATOM | 2441 | SG  | CYS A 961 | 62.895 | 45.536 | 61.488 | 1.00 | 0.00 | S |
| ATOM | 2442 | N   | ILE A 962 | 65.990 | 47.317 | 63.313 | 1.00 | 0.00 | N |
| ATOM | 2443 | CA  | ILE A 962 | 66.085 | 48.747 | 63.353 | 1.00 | 0.00 | C |
| ATOM | 2444 | C   | ILE A 962 | 67.200 | 49.219 | 62.471 | 1.00 | 0.00 | C |
| ATOM | 2445 | O   | ILE A 962 | 67.020 | 50.144 | 61.682 | 1.00 | 0.00 | O |
| ATOM | 2446 | CB  | ILE A 962 | 66.406 | 49.263 | 64.726 | 1.00 | 0.00 | C |
| ATOM | 2447 | CG1 | ILE A 962 | 65.342 | 48.819 | 65.743 | 1.00 | 0.00 | C |
| ATOM | 2448 | CG2 | ILE A 962 | 66.556 | 50.789 | 64.626 | 1.00 | 0.00 | C |
| ATOM | 2449 | CD1 | ILE A 962 | 63.945 | 49.350 | 65.440 | 1.00 | 0.00 | C |
| ATOM | 2450 | N   | TYR A 963 | 68.378 | 48.574 | 62.558 | 1.00 | 0.00 | N |
| ATOM | 2451 | CA  | TYR A 963 | 69.508 | 49.086 | 61.839 | 1.00 | 0.00 | C |
| ATOM | 2452 | C   | TYR A 963 | 69.269 | 49.022 | 60.369 | 1.00 | 0.00 | C |
| ATOM | 2453 | O   | TYR A 963 | 69.712 | 49.901 | 59.633 | 1.00 | 0.00 | O |
| ATOM | 2454 | CB  | TYR A 963 | 70.869 | 48.430 | 62.164 | 1.00 | 0.00 | C |
| ATOM | 2455 | CG  | TYR A 963 | 70.943 | 47.021 | 61.693 | 1.00 | 0.00 | C |
| ATOM | 2456 | CD1 | TYR A 963 | 71.115 | 46.725 | 60.361 | 1.00 | 0.00 | C |
| ATOM | 2457 | CD2 | TYR A 963 | 70.882 | 45.993 | 62.602 | 1.00 | 0.00 | C |

|      |      |               |        |        |        |      |      |   |
|------|------|---------------|--------|--------|--------|------|------|---|
| ATOM | 2458 | CE1 TYR A 963 | 71.198 | 45.419 | 59.938 | 1.00 | 0.00 | C |
| ATOM | 2459 | CE2 TYR A 963 | 70.967 | 44.685 | 62.187 | 1.00 | 0.00 | C |
| ATOM | 2460 | CZ TYR A 963  | 71.119 | 44.396 | 60.853 | 1.00 | 0.00 | C |
| ATOM | 2461 | OH TYR A 963  | 71.206 | 43.053 | 60.430 | 1.00 | 0.00 | O |
| ATOM | 2462 | N MET A 964   | 68.551 | 47.991 | 59.894 | 1.00 | 0.00 | N |
| ATOM | 2463 | CA MET A 964  | 68.383 | 47.829 | 58.478 | 1.00 | 0.00 | C |
| ATOM | 2464 | C MET A 964   | 67.750 | 49.067 | 57.914 | 1.00 | 0.00 | C |
| ATOM | 2465 | O MET A 964   | 68.155 | 49.553 | 56.861 | 1.00 | 0.00 | O |
| ATOM | 2466 | CB MET A 964  | 67.442 | 46.669 | 58.117 | 1.00 | 0.00 | C |
| ATOM | 2467 | CG MET A 964  | 67.950 | 45.291 | 58.549 | 1.00 | 0.00 | C |
| ATOM | 2468 | SD MET A 964  | 66.795 | 43.931 | 58.197 | 1.00 | 0.00 | S |
| ATOM | 2469 | CE MET A 964  | 65.558 | 44.460 | 59.420 | 1.00 | 0.00 | C |
| ATOM | 2470 | N LEU A 965   | 66.739 | 49.622 | 58.599 | 1.00 | 0.00 | N |
| ATOM | 2471 | CA LEU A 965  | 66.094 | 50.774 | 58.042 | 1.00 | 0.00 | C |
| ATOM | 2472 | C LEU A 965   | 67.099 | 51.885 | 57.981 | 1.00 | 0.00 | C |
| ATOM | 2473 | O LEU A 965   | 67.210 | 52.575 | 56.969 | 1.00 | 0.00 | O |
| ATOM | 2474 | CB LEU A 965  | 64.882 | 51.226 | 58.885 | 1.00 | 0.00 | C |
| ATOM | 2475 | CG LEU A 965  | 63.948 | 52.287 | 58.247 | 1.00 | 0.00 | C |
| ATOM | 2476 | CD1 LEU A 965 | 62.794 | 52.628 | 59.204 | 1.00 | 0.00 | C |
| ATOM | 2477 | CD2 LEU A 965 | 64.688 | 53.552 | 57.778 | 1.00 | 0.00 | C |
| ATOM | 2478 | N SER A 966   | 67.878 | 52.073 | 59.062 | 1.00 | 0.00 | N |
| ATOM | 2479 | CA SER A 966  | 68.802 | 53.171 | 59.110 | 1.00 | 0.00 | C |
| ATOM | 2480 | C SER A 966   | 69.840 | 53.007 | 58.049 | 1.00 | 0.00 | C |
| ATOM | 2481 | O SER A 966   | 70.142 | 53.941 | 57.311 | 1.00 | 0.00 | O |
| ATOM | 2482 | CB SER A 966  | 69.528 | 53.287 | 60.460 | 1.00 | 0.00 | C |
| ATOM | 2483 | OG SER A 966  | 70.383 | 52.172 | 60.659 | 1.00 | 0.00 | O |
| ATOM | 2484 | N THR A 967   | 70.394 | 51.794 | 57.928 | 1.00 | 0.00 | N |
| ATOM | 2485 | CA THR A 967  | 71.444 | 51.569 | 56.986 | 1.00 | 0.00 | C |
| ATOM | 2486 | C THR A 967   | 70.937 | 51.823 | 55.608 | 1.00 | 0.00 | C |
| ATOM | 2487 | O THR A 967   | 71.612 | 52.453 | 54.796 | 1.00 | 0.00 | O |
| ATOM | 2488 | CB THR A 967  | 71.982 | 50.167 | 57.056 | 1.00 | 0.00 | C |
| ATOM | 2489 | CG2 THR A 967 | 70.863 | 49.152 | 56.789 | 1.00 | 0.00 | C |
| ATOM | 2490 | OG1 THR A 967 | 73.016 | 50.008 | 56.103 | 1.00 | 0.00 | O |
| ATOM | 2491 | N ASN A 968   | 69.707 | 51.373 | 55.316 | 1.00 | 0.00 | N |
| ATOM | 2492 | CA ASN A 968  | 69.223 | 51.505 | 53.979 | 1.00 | 0.00 | C |
| ATOM | 2493 | C ASN A 968   | 69.187 | 52.948 | 53.593 | 1.00 | 0.00 | C |
| ATOM | 2494 | O ASN A 968   | 69.579 | 53.306 | 52.484 | 1.00 | 0.00 | O |
| ATOM | 2495 | CB ASN A 968  | 67.808 | 50.933 | 53.790 | 1.00 | 0.00 | C |
| ATOM | 2496 | CG ASN A 968  | 67.503 | 50.969 | 52.300 | 1.00 | 0.00 | C |
| ATOM | 2497 | ND2 ASN A 968 | 67.755 | 49.828 | 51.598 | 1.00 | 0.00 | N |
| ATOM | 2498 | OD1 ASN A 968 | 67.065 | 51.987 | 51.767 | 1.00 | 0.00 | O |
| ATOM | 2499 | N ILE A 969   | 68.729 | 53.823 | 54.502 | 1.00 | 0.00 | N |
| ATOM | 2500 | CA ILE A 969  | 68.618 | 55.194 | 54.115 | 1.00 | 0.00 | C |
| ATOM | 2501 | C ILE A 969   | 70.001 | 55.706 | 53.864 | 1.00 | 0.00 | C |

|      |      |     |           |        |        |        |      |      |   |
|------|------|-----|-----------|--------|--------|--------|------|------|---|
| ATOM | 2502 | O   | ILE A 969 | 70.228 | 56.515 | 52.969 | 1.00 | 0.00 | O |
| ATOM | 2503 | CB  | ILE A 969 | 67.983 | 56.083 | 55.124 | 1.00 | 0.00 | C |
| ATOM | 2504 | CG1 | ILE A 969 | 66.738 | 55.446 | 55.755 | 1.00 | 0.00 | C |
| ATOM | 2505 | CG2 | ILE A 969 | 67.566 | 57.286 | 54.279 | 1.00 | 0.00 | C |
| ATOM | 2506 | CD1 | ILE A 969 | 66.243 | 56.198 | 56.990 | 1.00 | 0.00 | C |
| ATOM | 2507 | N   | LEU A 970 | 70.980 | 55.260 | 54.668 | 1.00 | 0.00 | N |
| ATOM | 2508 | CA  | LEU A 970 | 72.302 | 55.758 | 54.457 | 1.00 | 0.00 | C |
| ATOM | 2509 | C   | LEU A 970 | 72.743 | 55.402 | 53.076 | 1.00 | 0.00 | C |
| ATOM | 2510 | O   | LEU A 970 | 73.273 | 56.250 | 52.363 | 1.00 | 0.00 | O |
| ATOM | 2511 | CB  | LEU A 970 | 73.339 | 55.186 | 55.436 | 1.00 | 0.00 | C |
| ATOM | 2512 | CG  | LEU A 970 | 74.771 | 55.628 | 55.086 | 1.00 | 0.00 | C |
| ATOM | 2513 | CD1 | LEU A 970 | 74.898 | 57.157 | 55.048 | 1.00 | 0.00 | C |
| ATOM | 2514 | CD2 | LEU A 970 | 75.786 | 54.976 | 56.029 | 1.00 | 0.00 | C |
| ATOM | 2515 | N   | LEU A 971 | 72.512 | 54.154 | 52.636 | 1.00 | 0.00 | N |
| ATOM | 2516 | CA  | LEU A 971 | 72.958 | 53.811 | 51.319 | 1.00 | 0.00 | C |
| ATOM | 2517 | C   | LEU A 971 | 72.241 | 54.668 | 50.330 | 1.00 | 0.00 | C |
| ATOM | 2518 | O   | LEU A 971 | 72.862 | 55.210 | 49.418 | 1.00 | 0.00 | O |
| ATOM | 2519 | CB  | LEU A 971 | 72.721 | 52.340 | 50.933 | 1.00 | 0.00 | C |
| ATOM | 2520 | CG  | LEU A 971 | 73.680 | 51.354 | 51.625 | 1.00 | 0.00 | C |
| ATOM | 2521 | CD1 | LEU A 971 | 73.533 | 51.387 | 53.153 | 1.00 | 0.00 | C |
| ATOM | 2522 | CD2 | LEU A 971 | 73.531 | 49.939 | 51.047 | 1.00 | 0.00 | C |
| ATOM | 2523 | N   | VAL A 972 | 70.918 | 54.855 | 50.494 | 1.00 | 0.00 | N |
| ATOM | 2524 | CA  | VAL A 972 | 70.205 | 55.630 | 49.520 | 1.00 | 0.00 | C |
| ATOM | 2525 | C   | VAL A 972 | 70.788 | 56.999 | 49.536 | 1.00 | 0.00 | C |
| ATOM | 2526 | O   | VAL A 972 | 70.856 | 57.679 | 48.514 | 1.00 | 0.00 | O |
| ATOM | 2527 | CB  | VAL A 972 | 68.716 | 55.726 | 49.748 | 1.00 | 0.00 | C |
| ATOM | 2528 | CG1 | VAL A 972 | 68.412 | 56.647 | 50.939 | 1.00 | 0.00 | C |
| ATOM | 2529 | CG2 | VAL A 972 | 68.065 | 56.201 | 48.440 | 1.00 | 0.00 | C |
| ATOM | 2530 | N   | ASN A 973 | 71.240 | 57.438 | 50.720 | 1.00 | 0.00 | N |
| ATOM | 2531 | CA  | ASN A 973 | 71.826 | 58.736 | 50.841 | 1.00 | 0.00 | C |
| ATOM | 2532 | C   | ASN A 973 | 73.016 | 58.807 | 49.932 | 1.00 | 0.00 | C |
| ATOM | 2533 | O   | ASN A 973 | 73.163 | 59.770 | 49.179 | 1.00 | 0.00 | O |
| ATOM | 2534 | CB  | ASN A 973 | 72.323 | 59.006 | 52.269 | 1.00 | 0.00 | C |
| ATOM | 2535 | CG  | ASN A 973 | 72.880 | 60.421 | 52.340 | 1.00 | 0.00 | C |
| ATOM | 2536 | ND2 | ASN A 973 | 73.372 | 60.810 | 53.547 | 1.00 | 0.00 | N |
| ATOM | 2537 | OD1 | ASN A 973 | 72.889 | 61.154 | 51.353 | 1.00 | 0.00 | O |
| ATOM | 2538 | N   | LEU A 974 | 73.896 | 57.784 | 49.974 | 1.00 | 0.00 | N |
| ATOM | 2539 | CA  | LEU A 974 | 75.103 | 57.747 | 49.189 | 1.00 | 0.00 | C |
| ATOM | 2540 | C   | LEU A 974 | 74.832 | 57.601 | 47.721 | 1.00 | 0.00 | C |
| ATOM | 2541 | O   | LEU A 974 | 75.461 | 58.276 | 46.911 | 1.00 | 0.00 | O |
| ATOM | 2542 | CB  | LEU A 974 | 76.055 | 56.605 | 49.585 | 1.00 | 0.00 | C |
| ATOM | 2543 | CG  | LEU A 974 | 76.827 | 56.841 | 50.901 | 1.00 | 0.00 | C |
| ATOM | 2544 | CD1 | LEU A 974 | 75.884 | 57.028 | 52.095 | 1.00 | 0.00 | C |
| ATOM | 2545 | CD2 | LEU A 974 | 77.866 | 55.732 | 51.134 | 1.00 | 0.00 | C |



|      |      |     |           |        |        |        |      |      |   |
|------|------|-----|-----------|--------|--------|--------|------|------|---|
| ATOM | 2546 | N   | LEU A 975 | 73.868 | 56.743 | 47.339 | 1.00 | 0.00 | N |
| ATOM | 2547 | CA  | LEU A 975 | 73.645 | 56.412 | 45.958 | 1.00 | 0.00 | C |
| ATOM | 2548 | C   | LEU A 975 | 73.312 | 57.614 | 45.137 | 1.00 | 0.00 | C |
| ATOM | 2549 | O   | LEU A 975 | 73.720 | 57.692 | 43.979 | 1.00 | 0.00 | O |
| ATOM | 2550 | CB  | LEU A 975 | 72.510 | 55.393 | 45.728 | 1.00 | 0.00 | C |
| ATOM | 2551 | CG  | LEU A 975 | 72.901 | 53.911 | 45.902 | 1.00 | 0.00 | C |
| ATOM | 2552 | CD1 | LEU A 975 | 73.855 | 53.471 | 44.780 | 1.00 | 0.00 | C |
| ATOM | 2553 | CD2 | LEU A 975 | 73.457 | 53.597 | 47.294 | 1.00 | 0.00 | C |
| ATOM | 2554 | N   | VAL A 976 | 72.580 | 58.589 | 45.700 | 1.00 | 0.00 | N |
| ATOM | 2555 | CA  | VAL A 976 | 72.134 | 59.673 | 44.875 | 1.00 | 0.00 | C |
| ATOM | 2556 | C   | VAL A 976 | 73.288 | 60.389 | 44.232 | 1.00 | 0.00 | C |
| ATOM | 2557 | O   | VAL A 976 | 73.207 | 60.752 | 43.061 | 1.00 | 0.00 | O |
| ATOM | 2558 | CB  | VAL A 976 | 71.322 | 60.699 | 45.597 | 1.00 | 0.00 | C |
| ATOM | 2559 | CG1 | VAL A 976 | 70.944 | 61.785 | 44.574 | 1.00 | 0.00 | C |
| ATOM | 2560 | CG2 | VAL A 976 | 70.110 | 60.011 | 46.246 | 1.00 | 0.00 | C |
| ATOM | 2561 | N   | ALA A 977 | 74.398 | 60.626 | 44.959 | 1.00 | 0.00 | N |
| ATOM | 2562 | CA  | ALA A 977 | 75.487 | 61.337 | 44.345 | 1.00 | 0.00 | C |
| ATOM | 2563 | C   | ALA A 977 | 76.065 | 60.473 | 43.237 | 1.00 | 0.00 | C |
| ATOM | 2564 | O   | ALA A 977 | 75.935 | 59.252 | 43.310 | 1.00 | 0.00 | O |
| ATOM | 2565 | CB  | ALA A 977 | 76.620 | 61.681 | 45.326 | 1.00 | 0.00 | C |
| ATOM | 2566 | N   | MET A 978 | 76.767 | 60.579 | 43.129 | 1.00 | 0.00 | N |
| ATOM | 2567 | CA  | MET A 978 | 77.387 | 59.820 | 42.060 | 1.00 | 0.00 | C |
| ATOM | 2568 | C   | MET A 978 | 78.476 | 59.050 | 42.716 | 1.00 | 0.00 | C |
| ATOM | 2569 | O   | MET A 978 | 79.235 | 59.595 | 43.516 | 1.00 | 0.00 | O |
| ATOM | 2570 | CB  | MET A 978 | 78.050 | 60.671 | 40.966 | 1.00 | 0.00 | C |
| ATOM | 2571 | CG  | MET A 978 | 77.057 | 61.478 | 40.133 | 1.00 | 0.00 | C |
| ATOM | 2572 | SD  | MET A 978 | 76.269 | 62.836 | 41.043 | 1.00 | 0.00 | S |
| ATOM | 2573 | CE  | MET A 978 | 75.256 | 63.420 | 39.656 | 1.00 | 0.00 | C |
| ATOM | 2574 | N   | PHE A 979 | 78.590 | 57.750 | 42.395 | 1.00 | 0.00 | N |
| ATOM | 2575 | CA  | PHE A 979 | 79.582 | 57.005 | 43.100 | 1.00 | 0.00 | C |
| ATOM | 2576 | C   | PHE A 979 | 80.587 | 56.530 | 42.117 | 1.00 | 0.00 | C |
| ATOM | 2577 | O   | PHE A 979 | 80.249 | 56.138 | 41.000 | 1.00 | 0.00 | O |
| ATOM | 2578 | CB  | PHE A 979 | 79.025 | 55.767 | 43.822 | 1.00 | 0.00 | C |
| ATOM | 2579 | CG  | PHE A 979 | 80.091 | 55.259 | 44.723 | 1.00 | 0.00 | C |
| ATOM | 2580 | CD1 | PHE A 979 | 80.225 | 55.773 | 45.992 | 1.00 | 0.00 | C |
| ATOM | 2581 | CD2 | PHE A 979 | 80.962 | 54.280 | 44.305 | 1.00 | 0.00 | C |
| ATOM | 2582 | CE1 | PHE A 979 | 81.208 | 55.314 | 46.835 | 1.00 | 0.00 | C |
| ATOM | 2583 | CE2 | PHE A 979 | 81.951 | 53.819 | 45.144 | 1.00 | 0.00 | C |
| ATOM | 2584 | CZ  | PHE A 979 | 82.075 | 54.335 | 46.412 | 1.00 | 0.00 | C |
| ATOM | 2585 | N   | GLY A 980 | 81.871 | 56.578 | 42.519 | 1.00 | 0.00 | N |
| ATOM | 2586 | CA  | GLY A 980 | 82.913 | 56.104 | 41.667 | 1.00 | 0.00 | C |
| ATOM | 2587 | C   | GLY A 980 | 82.826 | 56.862 | 40.392 | 1.00 | 0.00 | C |
| ATOM | 2588 | O   | GLY A 980 | 82.716 | 58.089 | 40.379 | 1.00 | 0.00 | O |
| ATOM | 2589 | N   | TYR A 981 | 82.849 | 56.117 | 39.274 | 1.00 | 0.00 | N |

|      |      |     |     |   |     |        |        |        |      |      |   |
|------|------|-----|-----|---|-----|--------|--------|--------|------|------|---|
| ATOM | 2590 | CA  | TYR | A | 981 | 82.795 | 56.717 | 37.982 | 1.00 | 0.00 | C |
| ATOM | 2591 | C   | TYR | A | 981 | 81.531 | 56.227 | 37.363 | 1.00 | 0.00 | C |
| ATOM | 2592 | O   | TYR | A | 981 | 81.175 | 55.058 | 37.501 | 1.00 | 0.00 | O |
| ATOM | 2593 | CB  | TYR | A | 981 | 83.956 | 56.256 | 37.085 | 1.00 | 0.00 | C |
| ATOM | 2594 | CG  | TYR | A | 981 | 83.956 | 57.064 | 35.837 | 1.00 | 0.00 | C |
| ATOM | 2595 | CD1 | TYR | A | 981 | 84.547 | 58.303 | 35.826 | 1.00 | 0.00 | C |
| ATOM | 2596 | CD2 | TYR | A | 981 | 83.387 | 56.583 | 34.681 | 1.00 | 0.00 | C |
| ATOM | 2597 | CE1 | TYR | A | 981 | 84.565 | 59.065 | 34.685 | 1.00 | 0.00 | C |
| ATOM | 2598 | CE2 | TYR | A | 981 | 83.402 | 57.340 | 33.531 | 1.00 | 0.00 | C |
| ATOM | 2599 | CZ  | TYR | A | 981 | 83.991 | 58.581 | 33.534 | 1.00 | 0.00 | C |
| ATOM | 2600 | OH  | TYR | A | 981 | 84.010 | 59.361 | 32.359 | 1.00 | 0.00 | O |
| ATOM | 2601 | N   | THR | A | 982 | 80.798 | 57.125 | 36.681 | 1.00 | 0.00 | N |
| ATOM | 2602 | CA  | THR | A | 982 | 79.573 | 56.715 | 36.069 | 1.00 | 0.00 | C |
| ATOM | 2603 | C   | THR | A | 982 | 79.895 | 55.738 | 35.000 | 1.00 | 0.00 | C |
| ATOM | 2604 | O   | THR | A | 982 | 80.748 | 55.987 | 34.149 | 1.00 | 0.00 | O |
| ATOM | 2605 | CB  | THR | A | 982 | 78.818 | 57.839 | 35.425 | 1.00 | 0.00 | C |
| ATOM | 2606 | CG2 | THR | A | 982 | 77.612 | 57.276 | 34.660 | 1.00 | 0.00 | C |
| ATOM | 2607 | OG1 | THR | A | 982 | 78.398 | 58.770 | 36.404 | 1.00 | 0.00 | O |
| ATOM | 2608 | N   | VAL | A | 983 | 79.205 | 54.586 | 35.028 | 1.00 | 0.00 | N |
| ATOM | 2609 | CA  | VAL | A | 983 | 79.427 | 53.578 | 34.043 | 1.00 | 0.00 | C |
| ATOM | 2610 | C   | VAL | A | 983 | 78.087 | 53.087 | 33.612 | 1.00 | 0.00 | C |
| ATOM | 2611 | O   | VAL | A | 983 | 77.103 | 53.212 | 34.340 | 1.00 | 0.00 | O |
| ATOM | 2612 | CB  | VAL | A | 983 | 80.175 | 52.391 | 34.569 | 1.00 | 0.00 | C |
| ATOM | 2613 | CG1 | VAL | A | 983 | 81.586 | 52.845 | 34.985 | 1.00 | 0.00 | C |
| ATOM | 2614 | CG2 | VAL | A | 983 | 79.356 | 51.774 | 35.710 | 1.00 | 0.00 | C |
| ATOM | 2615 | N   | GLY | A | 984 | 78.022 | 52.534 | 32.387 | 1.00 | 0.00 | N |
| ATOM | 2616 | CA  | GLY | A | 984 | 76.796 | 51.994 | 31.883 | 1.00 | 0.00 | C |
| ATOM | 2617 | C   | GLY | A | 984 | 76.123 | 53.058 | 31.084 | 1.00 | 0.00 | C |
| ATOM | 2618 | O   | GLY | A | 984 | 76.249 | 54.247 | 31.372 | 1.00 | 0.00 | O |
| ATOM | 2619 | N   | THR | A | 985 | 75.379 | 52.636 | 30.045 | 1.00 | 0.00 | N |
| ATOM | 2620 | CA  | THR | A | 985 | 74.665 | 53.554 | 29.212 | 1.00 | 0.00 | C |
| ATOM | 2621 | C   | THR | A | 985 | 73.599 | 54.185 | 30.041 | 1.00 | 0.00 | C |
| ATOM | 2622 | O   | THR | A | 985 | 73.357 | 55.389 | 29.953 | 1.00 | 0.00 | O |
| ATOM | 2623 | CB  | THR | A | 985 | 73.979 | 52.893 | 28.056 | 1.00 | 0.00 | C |
| ATOM | 2624 | CG2 | THR | A | 985 | 73.210 | 53.964 | 27.268 | 1.00 | 0.00 | C |
| ATOM | 2625 | OG1 | THR | A | 985 | 74.935 | 52.251 | 27.223 | 1.00 | 0.00 | O |
| ATOM | 2626 | N   | VAL | A | 986 | 72.946 | 53.374 | 30.894 | 1.00 | 0.00 | N |
| ATOM | 2627 | CA  | VAL | A | 986 | 71.865 | 53.876 | 31.684 | 1.00 | 0.00 | C |
| ATOM | 2628 | C   | VAL | A | 986 | 72.385 | 54.991 | 32.520 | 1.00 | 0.00 | C |
| ATOM | 2629 | O   | VAL | A | 986 | 71.798 | 56.071 | 32.568 | 1.00 | 0.00 | O |
| ATOM | 2630 | CB  | VAL | A | 986 | 71.308 | 52.835 | 32.616 | 1.00 | 0.00 | C |
| ATOM | 2631 | CG1 | VAL | A | 986 | 70.241 | 53.492 | 33.506 | 1.00 | 0.00 | C |
| ATOM | 2632 | CG2 | VAL | A | 986 | 70.793 | 51.651 | 31.781 | 1.00 | 0.00 | C |
| ATOM | 2633 | N   | GLN | A | 987 | 73.530 | 54.772 | 33.189 | 1.00 | 0.00 | N |

|      |      |     |           |        |        |        |      |      |   |
|------|------|-----|-----------|--------|--------|--------|------|------|---|
| ATOM | 2634 | CA  | GLN A 987 | 74.027 | 55.816 | 34.029 | 1.00 | 0.00 | C |
| ATOM | 2635 | C   | GLN A 987 | 74.658 | 56.828 | 33.133 | 1.00 | 0.00 | C |
| ATOM | 2636 | O   | GLN A 987 | 75.440 | 56.489 | 32.244 | 1.00 | 0.00 | O |
| ATOM | 2637 | CB  | GLN A 987 | 75.060 | 55.314 | 35.052 | 1.00 | 0.00 | C |
| ATOM | 2638 | CG  | GLN A 987 | 75.319 | 56.276 | 36.212 | 1.00 | 0.00 | C |
| ATOM | 2639 | CD  | GLN A 987 | 76.265 | 55.571 | 37.174 | 1.00 | 0.00 | C |
| ATOM | 2640 | NE2 | GLN A 987 | 76.014 | 54.254 | 37.407 | 1.00 | 0.00 | N |
| ATOM | 2641 | OE1 | GLN A 987 | 77.193 | 56.173 | 37.710 | 1.00 | 0.00 | O |
| ATOM | 2642 | N   | GLU A 988 | 74.312 | 58.114 | 33.330 | 1.00 | 0.00 | N |
| ATOM | 2643 | CA  | GLU A 988 | 74.871 | 59.125 | 32.487 | 1.00 | 0.00 | C |
| ATOM | 2644 | C   | GLU A 988 | 75.215 | 60.290 | 33.355 | 1.00 | 0.00 | C |
| ATOM | 2645 | O   | GLU A 988 | 74.501 | 60.602 | 34.306 | 1.00 | 0.00 | O |
| ATOM | 2646 | CB  | GLU A 988 | 73.878 | 59.619 | 31.418 | 1.00 | 0.00 | C |
| ATOM | 2647 | CG  | GLU A 988 | 74.478 | 60.574 | 30.384 | 1.00 | 0.00 | C |
| ATOM | 2648 | CD  | GLU A 988 | 74.519 | 61.972 | 30.980 | 1.00 | 0.00 | C |
| ATOM | 2649 | OE1 | GLU A 988 | 73.810 | 62.212 | 31.995 | 1.00 | 0.00 | O |
| ATOM | 2650 | OE2 | GLU A 988 | 75.261 | 62.820 | 30.423 | 1.00 | 0.00 | O |
| ATOM | 2651 | N   | ASN A 989 | 76.347 | 60.959 | 33.060 | 1.00 | 0.00 | N |
| ATOM | 2652 | CA  | ASN A 989 | 76.697 | 62.115 | 33.826 | 1.00 | 0.00 | C |
| ATOM | 2653 | C   | ASN A 989 | 76.781 | 63.254 | 32.867 | 1.00 | 0.00 | C |
| ATOM | 2654 | O   | ASN A 989 | 77.382 | 63.137 | 31.801 | 1.00 | 0.00 | O |
| ATOM | 2655 | CB  | ASN A 989 | 78.053 | 62.013 | 34.544 | 1.00 | 0.00 | C |
| ATOM | 2656 | CG  | ASN A 989 | 78.136 | 63.156 | 35.549 | 1.00 | 0.00 | C |
| ATOM | 2657 | ND2 | ASN A 989 | 78.542 | 62.828 | 36.803 | 1.00 | 0.00 | N |
| ATOM | 2658 | OD1 | ASN A 989 | 77.839 | 64.307 | 35.230 | 1.00 | 0.00 | O |
| ATOM | 2659 | N   | ASN A 990 | 76.160 | 64.394 | 33.211 | 1.00 | 0.00 | N |
| ATOM | 2660 | CA  | ASN A 990 | 76.216 | 65.486 | 32.290 | 1.00 | 0.00 | C |
| ATOM | 2661 | C   | ASN A 990 | 77.153 | 66.510 | 32.836 | 1.00 | 0.00 | C |
| ATOM | 2662 | O   | ASN A 990 | 76.948 | 67.045 | 33.922 | 1.00 | 0.00 | O |
| ATOM | 2663 | CB  | ASN A 990 | 74.873 | 66.209 | 32.091 | 1.00 | 0.00 | C |
| ATOM | 2664 | CG  | ASN A 990 | 73.883 | 65.292 | 31.388 | 1.00 | 0.00 | C |
| ATOM | 2665 | ND2 | ASN A 990 | 74.033 | 65.154 | 30.043 | 1.00 | 0.00 | N |
| ATOM | 2666 | OD1 | ASN A 990 | 72.989 | 64.727 | 32.017 | 1.00 | 0.00 | O |
| ATOM | 2667 | N   | ASP A 991 | 78.235 | 66.788 | 32.086 | 1.00 | 0.00 | N |
| ATOM | 2668 | CA  | ASP A 991 | 79.139 | 67.819 | 32.488 | 1.00 | 0.00 | C |
| ATOM | 2669 | C   | ASP A 991 | 78.404 | 69.110 | 32.339 | 1.00 | 0.00 | C |
| ATOM | 2670 | O   | ASP A 991 | 78.585 | 70.043 | 33.119 | 1.00 | 0.00 | O |
| ATOM | 2671 | CB  | ASP A 991 | 80.417 | 67.882 | 31.635 | 1.00 | 0.00 | C |
| ATOM | 2672 | CG  | ASP A 991 | 80.037 | 68.181 | 30.192 | 1.00 | 0.00 | C |
| ATOM | 2673 | OD1 | ASP A 991 | 78.984 | 67.663 | 29.732 | 1.00 | 0.00 | O |
| ATOM | 2674 | OD2 | ASP A 991 | 80.800 | 68.934 | 29.531 | 1.00 | 0.00 | O |
| ATOM | 2675 | N   | GLN A 992 | 77.542 | 69.185 | 31.305 | 1.00 | 0.00 | N |
| ATOM | 2676 | CA  | GLN A 992 | 76.806 | 70.384 | 31.041 | 1.00 | 0.00 | C |
| ATOM | 2677 | C   | GLN A 992 | 75.842 | 70.670 | 32.154 | 1.00 | 0.00 | C |

|      |      |     |           |        |        |        |      |      |     |
|------|------|-----|-----------|--------|--------|--------|------|------|-----|
| ATOM | 2678 | O   | GLN A 992 | 75.697 | 71.824 | 32.556 | 1.00 | 0.00 | O   |
| ATOM | 2679 | CB  | GLN A 992 | 76.074 | 70.374 | 29.683 | 1.00 | 0.00 | C   |
| ATOM | 2680 | CG  | GLN A 992 | 75.013 | 69.291 | 29.487 | 1.00 | 0.00 | C   |
| ATOM | 2681 | CD  | GLN A 992 | 74.465 | 69.462 | 28.074 | 1.00 | 0.00 | C   |
| ATOM | 2682 | NE2 | GLN A 992 | 75.361 | 69.351 | 27.055 | 1.00 | 0.00 | N   |
| ATOM | 2683 | OE1 | GLN A 992 | 73.269 | 69.690 | 27.879 | 1.00 | 0.00 | O   |
| ATOM | 2684 | N   | VAL A 993 | 75.183 | 69.635 | 32.719 | 1.00 | 0.00 | N   |
| ATOM | 2685 | CA  | VAL A 993 | 74.231 | 69.872 | 33.772 | 1.00 | 0.00 | C   |
| ATOM | 2686 | C   | VAL A 993 | 74.953 | 70.549 | 34.877 | 1.00 | 0.00 | C   |
| ATOM | 2687 | O   | VAL A 993 | 74.461 | 71.511 | 35.467 | 1.00 | 0.00 | O   |
| ATOM | 2688 | CB  | VAL A 993 | 73.664 | 68.624 | 34.394 | 1.00 | 0.00 | C   |
| ATOM | 2689 | CG1 | VAL A 993 | 72.865 | 69.032 | 35.643 | 1.00 | 0.00 | C   |
| ATOM | 2690 | CG2 | VAL A 993 | 72.813 | 67.870 | 33.362 | 1.00 | 0.00 | C   |
| ATOM | 2691 | N   | TRP A 994 | 76.160 | 70.061 | 35.193 | 1.00 | 0.00 | N   |
| ATOM | 2692 | CA  | TRP A 994 | 76.892 | 70.707 | 36.228 | 1.00 | 0.00 | C   |
| ATOM | 2693 | C   | TRP A 994 | 77.096 | 72.127 | 35.889 | 1.00 | 0.00 | C   |
| ATOM | 2694 | O   | TRP A 994 | 76.863 | 72.995 | 36.728 | 1.00 | 0.00 | O   |
| ATOM | 2695 | CB  | TRP A 994 | 78.332 | 70.284 | 36.342 | 1.00 | 0.00 | C   |
| ATOM | 2696 | CG  | TRP A 994 | 79.173 | 71.463 | 36.785 | 1.00 | 0.00 | C   |
| ATOM | 2697 | CD1 | TRP A 994 | 79.170 | 72.212 | 37.936 | 1.00 | 0.00 | C   |
| ATOM | 2698 | CD2 | TRP A 994 | 80.346 | 71.869 | 36.055 | 1.00 | 0.00 | C   |
| ATOM | 2699 | CE2 | TRP A 994 | 81.003 | 72.834 | 36.819 | 1.00 | 0.00 | C   |
| ATOM | 2700 | CE3 | TRP A 994 | 80.854 | 71.439 | 34.864 | 1.00 | 0.00 | C   |
| ATOM | 2701 | NE1 | TRP A 994 | 80.271 | 73.035 | 37.966 | 1.00 | 0.00 | N   |
| ATOM | 2702 | CZ2 | TRP A 994 | 82.178 | 73.386 | 36.398 | 1.00 | 0.00 | C   |
| ATOM | 2703 | CZ3 | TRP A 994 | 82.022 | 72.022 | 34.430 | 1.00 | 0.00 | C   |
| ATOM | 2704 | CH2 | TRP A 994 | 82.673 | 72.977 | 35.184 | 1.00 | 0.00 | C   |
| ATOM | 2705 | N   | LYS A 995 | 77.568 | 72.381 | 34.657 | 1.00 | 0.00 | N   |
| ATOM | 2706 | CA  | LYS A 995 | 77.976 | 73.705 | 34.308 | 1.00 | 0.00 | C   |
| ATOM | 2707 | C   | LYS A 995 | 76.828 | 74.616 | 34.526 | 1.00 | 0.00 | C   |
| ATOM | 2708 | O   | LYS A 995 | 77.017 | 75.746 | 34.973 | 1.00 | 0.00 | O   |
| ATOM | 2709 | CB  | LYS A 995 | 78.384 | 73.874 | 32.834 | 1.00 | 0.00 | C   |
| ATOM | 2710 | CG  | LYS A 995 | 79.857 | 73.597 | 32.524 | 1.00 | 0.00 | C   |
| ATOM | 2711 | CD  | LYS A 995 | 80.834 | 74.611 | 33.128 | 1.00 | 0.00 | C   |
| ATOM | 2712 | CE  | LYS A 995 | 82.272 | 74.411 | 32.639 | 1.00 | 0.00 | C   |
| ATOM | 2713 | NZ  | LYS A 995 | 83.150 | 75.479 | 33.164 | 1.00 | 0.00 | N1+ |
| ATOM | 2714 | N   | PHE A 996 | 75.611 | 74.144 | 34.224 | 1.00 | 0.00 | N   |
| ATOM | 2715 | CA  | PHE A 996 | 74.468 | 74.978 | 34.399 | 1.00 | 0.00 | C   |
| ATOM | 2716 | C   | PHE A 996 | 74.394 | 75.373 | 35.839 | 1.00 | 0.00 | C   |
| ATOM | 2717 | O   | PHE A 996 | 74.257 | 76.552 | 36.155 | 1.00 | 0.00 | O   |
| ATOM | 2718 | CB  | PHE A 996 | 73.148 | 74.261 | 34.051 | 1.00 | 0.00 | C   |
| ATOM | 2719 | CG  | PHE A 996 | 72.030 | 75.226 | 34.272 | 1.00 | 0.00 | C   |
| ATOM | 2720 | CD1 | PHE A 996 | 71.649 | 76.096 | 33.279 | 1.00 | 0.00 | C   |
| ATOM | 2721 | CD2 | PHE A 996 | 71.366 | 75.262 | 35.476 | 1.00 | 0.00 | C   |

|      |      |               |        |        |        |      |      |   |
|------|------|---------------|--------|--------|--------|------|------|---|
| ATOM | 2722 | CE1 PHE A 996 | 70.623 | 76.988 | 33.479 | 1.00 | 0.00 | C |
| ATOM | 2723 | CE2 PHE A 996 | 70.338 | 76.150 | 35.681 | 1.00 | 0.00 | C |
| ATOM | 2724 | CZ PHE A 996  | 69.961 | 77.017 | 34.683 | 1.00 | 0.00 | C |
| ATOM | 2725 | N GLN A 997   | 74.502 | 74.394 | 36.760 | 1.00 | 0.00 | N |
| ATOM | 2726 | CA GLN A 997  | 74.392 | 74.710 | 38.156 | 1.00 | 0.00 | C |
| ATOM | 2727 | C GLN A 997   | 75.527 | 75.586 | 38.575 | 1.00 | 0.00 | C |
| ATOM | 2728 | O GLN A 997   | 75.352 | 76.503 | 39.373 | 1.00 | 0.00 | O |
| ATOM | 2729 | CB GLN A 997  | 74.394 | 73.497 | 39.103 | 1.00 | 0.00 | C |
| ATOM | 2730 | CG GLN A 997  | 74.328 | 73.934 | 40.571 | 1.00 | 0.00 | C |
| ATOM | 2731 | CD GLN A 997  | 73.997 | 72.738 | 41.442 | 1.00 | 0.00 | C |
| ATOM | 2732 | NE2 GLN A 997 | 73.259 | 71.754 | 40.865 | 1.00 | 0.00 | N |
| ATOM | 2733 | OE1 GLN A 997 | 74.357 | 72.687 | 42.618 | 1.00 | 0.00 | O |
| ATOM | 2734 | N ARG A 998   | 76.728 | 75.315 | 38.053 | 1.00 | 0.00 | N |
| ATOM | 2735 | CA ARG A 998  | 77.893 | 76.065 | 38.416 | 1.00 | 0.00 | C |
| ATOM | 2736 | C ARG A 998   | 77.699 | 77.501 | 38.031 | 1.00 | 0.00 | C |
| ATOM | 2737 | O ARG A 998   | 77.974 | 78.406 | 38.815 | 1.00 | 0.00 | O |
| ATOM | 2738 | CB ARG A 998  | 79.115 | 75.547 | 37.647 | 1.00 | 0.00 | C |
| ATOM | 2739 | CG ARG A 998  | 80.329 | 76.464 | 37.686 | 1.00 | 0.00 | C |
| ATOM | 2740 | CD ARG A 998  | 80.464 | 77.343 | 36.443 | 1.00 | 0.00 | C |
| ATOM | 2741 | NE ARG A 998  | 81.694 | 78.163 | 36.632 | 1.00 | 0.00 | N |
| ATOM | 2742 | CZ ARG A 998  | 82.907 | 77.615 | 36.335 | 1.00 | 0.00 | C |
| ATOM | 2743 | NH1 ARG A 998 | 82.972 | 76.342 | 35.849 | 1.00 | 0.00 | N |
| ATOM | 2744 | NH2 ARG A 998 | 84.054 | 78.326 | 36.539 | 1.00 | 0.00 | N |
| ATOM | 2745 | N TYR A 999   | 77.204 | 77.722 | 36.799 | 1.00 | 0.00 | N |
| ATOM | 2746 | CA TYR A 999  | 76.981 | 79.017 | 36.228 | 1.00 | 0.00 | C |
| ATOM | 2747 | C TYR A 999   | 75.928 | 79.723 | 37.018 | 1.00 | 0.00 | C |
| ATOM | 2748 | O TYR A 999   | 76.039 | 80.911 | 37.306 | 1.00 | 0.00 | O |
| ATOM | 2749 | CB TYR A 999  | 76.489 | 78.901 | 34.772 | 1.00 | 0.00 | C |
| ATOM | 2750 | CG TYR A 999  | 76.183 | 80.251 | 34.229 | 1.00 | 0.00 | C |
| ATOM | 2751 | CD1 TYR A 999 | 77.202 | 81.126 | 33.955 | 1.00 | 0.00 | C |
| ATOM | 2752 | CD2 TYR A 999 | 74.892 | 80.643 | 33.959 | 1.00 | 0.00 | C |
| ATOM | 2753 | CE1 TYR A 999 | 76.957 | 82.374 | 33.443 | 1.00 | 0.00 | C |
| ATOM | 2754 | CE2 TYR A 999 | 74.635 | 81.891 | 33.442 | 1.00 | 0.00 | C |
| ATOM | 2755 | CZ TYR A 999  | 75.667 | 82.761 | 33.189 | 1.00 | 0.00 | C |
| ATOM | 2756 | OH TYR A 999  | 75.419 | 84.043 | 32.662 | 1.00 | 0.00 | O |
| ATOM | 2757 | N PHE A1000   | 74.868 | 78.991 | 37.390 | 1.00 | 0.00 | N |
| ATOM | 2758 | CA PHE A1000  | 73.775 | 79.575 | 38.105 | 1.00 | 0.00 | C |
| ATOM | 2759 | C PHE A1000   | 74.295 | 80.105 | 39.400 | 1.00 | 0.00 | C |
| ATOM | 2760 | O PHE A1000   | 73.991 | 81.236 | 39.776 | 1.00 | 0.00 | O |
| ATOM | 2761 | CB PHE A1000  | 72.680 | 78.539 | 38.419 | 1.00 | 0.00 | C |
| ATOM | 2762 | CG PHE A1000  | 71.580 | 79.215 | 39.159 | 1.00 | 0.00 | C |
| ATOM | 2763 | CD1 PHE A1000 | 70.625 | 79.942 | 38.482 | 1.00 | 0.00 | C |
| ATOM | 2764 | CD2 PHE A1000 | 71.500 | 79.116 | 40.529 | 1.00 | 0.00 | C |
| ATOM | 2765 | CE1 PHE A1000 | 69.608 | 80.562 | 39.166 | 1.00 | 0.00 | C |

|      |      |               |        |        |        |      |      |   |
|------|------|---------------|--------|--------|--------|------|------|---|
| ATOM | 2766 | CE2 PHE A1000 | 70.482 | 79.736 | 41.216 | 1.00 | 0.00 | C |
| ATOM | 2767 | CZ PHE A1000  | 69.535 | 80.460 | 40.534 | 1.00 | 0.00 | C |
| ATOM | 2768 | N LEU A1001   | 75.111 | 79.304 | 40.108 | 1.00 | 0.00 | N |
| ATOM | 2769 | CA LEU A1001  | 75.611 | 79.710 | 41.387 | 1.00 | 0.00 | C |
| ATOM | 2770 | C LEU A1001   | 76.490 | 80.918 | 41.250 | 1.00 | 0.00 | C |
| ATOM | 2771 | O LEU A1001   | 76.375 | 81.856 | 42.039 | 1.00 | 0.00 | O |
| ATOM | 2772 | CB LEU A1001  | 76.435 | 78.629 | 42.103 | 1.00 | 0.00 | C |
| ATOM | 2773 | CG LEU A1001  | 75.601 | 77.417 | 42.546 | 1.00 | 0.00 | C |
| ATOM | 2774 | CD1 LEU A1001 | 76.433 | 76.485 | 43.436 | 1.00 | 0.00 | C |
| ATOM | 2775 | CD2 LEU A1001 | 74.288 | 77.852 | 43.213 | 1.00 | 0.00 | C |
| ATOM | 2776 | N VAL A1002   | 77.383 | 80.938 | 40.246 | 1.00 | 0.00 | N |
| ATOM | 2777 | CA VAL A1002  | 78.288 | 82.044 | 40.129 | 1.00 | 0.00 | C |
| ATOM | 2778 | C VAL A1002   | 77.506 | 83.286 | 39.843 | 1.00 | 0.00 | C |
| ATOM | 2779 | O VAL A1002   | 77.803 | 84.347 | 40.387 | 1.00 | 0.00 | O |
| ATOM | 2780 | CB VAL A1002  | 79.313 | 81.873 | 39.042 | 1.00 | 0.00 | C |
| ATOM | 2781 | CG1 VAL A1002 | 80.176 | 80.641 | 39.375 | 1.00 | 0.00 | C |
| ATOM | 2782 | CG2 VAL A1002 | 78.604 | 81.801 | 37.680 | 1.00 | 0.00 | C |
| ATOM | 2783 | N GLN A1003   | 76.479 | 83.190 | 38.973 | 1.00 | 0.00 | N |
| ATOM | 2784 | CA GLN A1003  | 75.709 | 84.351 | 38.632 | 1.00 | 0.00 | C |
| ATOM | 2785 | C GLN A1003   | 75.015 | 84.856 | 39.853 | 1.00 | 0.00 | C |
| ATOM | 2786 | O GLN A1003   | 74.976 | 86.057 | 40.100 | 1.00 | 0.00 | O |
| ATOM | 2787 | CB GLN A1003  | 74.565 | 84.089 | 37.647 | 1.00 | 0.00 | C |
| ATOM | 2788 | CG GLN A1003  | 74.979 | 83.782 | 36.218 | 1.00 | 0.00 | C |
| ATOM | 2789 | CD GLN A1003  | 73.687 | 83.857 | 35.429 | 1.00 | 0.00 | C |
| ATOM | 2790 | NE2 GLN A1003 | 72.865 | 82.777 | 35.510 | 1.00 | 0.00 | N |
| ATOM | 2791 | OE1 GLN A1003 | 73.400 | 84.867 | 34.790 | 1.00 | 0.00 | O |
| ATOM | 2792 | N GLU A1004   | 74.448 | 83.936 | 40.655 | 1.00 | 0.00 | N |
| ATOM | 2793 | CA GLU A1004  | 73.706 | 84.335 | 41.815 | 1.00 | 0.00 | C |
| ATOM | 2794 | C GLU A1004   | 74.657 | 85.043 | 42.726 | 1.00 | 0.00 | C |
| ATOM | 2795 | O GLU A1004   | 74.321 | 86.046 | 43.351 | 1.00 | 0.00 | O |
| ATOM | 2796 | CB GLU A1004  | 73.122 | 83.127 | 42.570 | 1.00 | 0.00 | C |
| ATOM | 2797 | CG GLU A1004  | 72.309 | 83.497 | 43.810 | 1.00 | 0.00 | C |
| ATOM | 2798 | CD GLU A1004  | 71.809 | 82.199 | 44.430 | 1.00 | 0.00 | C |
| ATOM | 2799 | OE1 GLU A1004 | 71.399 | 81.296 | 43.653 | 1.00 | 0.00 | O |
| ATOM | 2800 | OE2 GLU A1004 | 71.837 | 82.089 | 45.685 | 1.00 | 0.00 | O |
| ATOM | 2801 | N TYR A1005   | 75.887 | 84.512 | 42.788 | 1.00 | 0.00 | N |
| ATOM | 2802 | CA TYR A1005  | 76.982 | 85.008 | 43.565 | 1.00 | 0.00 | C |
| ATOM | 2803 | C TYR A1005   | 77.304 | 86.396 | 43.099 | 1.00 | 0.00 | C |
| ATOM | 2804 | O TYR A1005   | 77.435 | 87.313 | 43.905 | 1.00 | 0.00 | O |
| ATOM | 2805 | CB TYR A1005  | 78.190 | 84.079 | 43.308 | 1.00 | 0.00 | C |
| ATOM | 2806 | CG TYR A1005  | 79.520 | 84.675 | 43.626 | 1.00 | 0.00 | C |
| ATOM | 2807 | CD1 TYR A1005 | 80.106 | 85.550 | 42.738 | 1.00 | 0.00 | C |
| ATOM | 2808 | CD2 TYR A1005 | 80.209 | 84.330 | 44.765 | 1.00 | 0.00 | C |
| ATOM | 2809 | CE1 TYR A1005 | 81.339 | 86.098 | 42.986 | 1.00 | 0.00 | C |

|        |      |               |        |        |        |      |      |      |
|--------|------|---------------|--------|--------|--------|------|------|------|
| ATOM   | 2810 | CE2 TYR A1005 | 81.446 | 84.875 | 45.020 | 1.00 | 0.00 | C    |
| ATOM   | 2811 | CZ TYR A1005  | 82.013 | 85.759 | 44.131 | 1.00 | 0.00 | C    |
| ATOM   | 2812 | OH TYR A1005  | 83.282 | 86.314 | 44.397 | 1.00 | 0.00 | O    |
| ATOM   | 2813 | N CYS A1006   | 77.407 | 86.578 | 41.772 | 1.00 | 0.00 | N    |
| ATOM   | 2814 | CA CYS A1006  | 77.762 | 87.856 | 41.231 | 1.00 | 0.00 | C    |
| ATOM   | 2815 | C CYS A1006   | 76.692 | 88.846 | 41.563 | 1.00 | 0.00 | C    |
| ATOM   | 2816 | O CYS A1006   | 76.978 | 89.968 | 41.974 | 1.00 | 0.00 | O    |
| ATOM   | 2817 | CB CYS A1006  | 77.924 | 87.831 | 39.702 | 1.00 | 0.00 | C    |
| ATOM   | 2818 | SG CYS A1006  | 79.296 | 86.762 | 39.168 | 1.00 | 0.00 | S    |
| ATOM   | 2819 | N SER A1007   | 75.418 | 88.449 | 41.394 | 1.00 | 0.00 | N    |
| ATOM   | 2820 | CA SER A1007  | 74.352 | 89.375 | 41.631 | 1.00 | 0.00 | C    |
| ATOM   | 2821 | C SER A1007   | 74.375 | 89.791 | 43.066 | 1.00 | 0.00 | C    |
| ATOM   | 2822 | O SER A1007   | 74.355 | 90.982 | 43.374 | 1.00 | 0.00 | O    |
| ATOM   | 2823 | CB SER A1007  | 72.967 | 88.765 | 41.348 | 1.00 | 0.00 | C    |
| ATOM   | 2824 | OG SER A1007  | 71.947 | 89.721 | 41.601 | 1.00 | 0.00 | O    |
| ATOM   | 2825 | N ARG A1008   | 74.428 | 88.811 | 43.987 | 1.00 | 0.00 | N    |
| ATOM   | 2826 | CA ARG A1008  | 74.369 | 89.126 | 45.387 | 1.00 | 0.00 | C    |
| ATOM   | 2827 | C ARG A1008   | 75.565 | 89.926 | 45.779 | 1.00 | 0.00 | C    |
| ATOM   | 2828 | O ARG A1008   | 75.449 | 90.943 | 46.459 | 1.00 | 0.00 | O    |
| ATOM   | 2829 | CB ARG A1008  | 74.336 | 87.872 | 46.278 | 1.00 | 0.00 | C    |
| ATOM   | 2830 | CG ARG A1008  | 74.272 | 88.184 | 47.775 | 1.00 | 0.00 | C    |
| ATOM   | 2831 | CD ARG A1008  | 74.180 | 86.931 | 48.650 | 1.00 | 0.00 | C    |
| ATOM   | 2832 | NE ARG A1008  | 74.180 | 87.375 | 50.074 | 1.00 | 0.00 | N    |
| ATOM   | 2833 | CZ ARG A1008  | 75.342 | 87.363 | 50.788 | 1.00 | 0.00 | C    |
| ATOM   | 2834 | NH1 ARG A1008 | 76.491 | 86.903 | 50.217 | 1.00 | 0.00 | N    |
| ATOM   | 2835 | NH2 ARG A1008 | 75.356 | 87.809 | 52.080 | 1.00 | 0.00 | N    |
| ATOM   | 2836 | N LEU A1009   | 76.755 | 89.487 | 45.333 | 1.00 | 0.00 | N    |
| ATOM   | 2837 | CA LEU A1009  | 77.978 | 90.135 | 45.697 | 1.00 | 0.00 | C    |
| ATOM   | 2838 | C LEU A1009   | 78.058 | 91.495 | 45.089 | 1.00 | 0.00 | C    |
| ATOM   | 2839 | O LEU A1009   | 78.777 | 92.353 | 45.600 | 1.00 | 0.00 | O    |
| ATOM   | 2840 | CB LEU A1009  | 79.251 | 89.348 | 45.355 | 1.00 | 0.00 | C    |
| ATOM   | 2841 | CG LEU A1009  | 79.408 | 88.103 | 46.244 | 1.00 | 0.00 | C    |
| ATOM   | 2842 | CD1 LEU A1009 | 80.825 | 87.528 | 46.151 | 1.00 | 0.00 | C    |
| ATOM   | 2843 | CD2 LEU A1009 | 78.979 | 88.391 | 47.692 | 1.00 | 0.00 | C    |
| ATOM   | 2844 | N ASN A1010   | 77.390 | 91.713 | 43.942 | 1.00 | 0.00 | N    |
| ATOM   | 2845 | CA ASN A1010  | 77.477 | 93.018 | 43.361 | 1.00 | 0.00 | C    |
| ATOM   | 2846 | C ASN A1010   | 76.430 | 93.913 | 44.013 | 1.00 | 0.00 | C    |
| ATOM   | 2847 | O ASN A1010   | 75.816 | 93.462 | 45.016 | 1.00 | 0.00 | O    |
| ATOM   | 2848 | CB ASN A1010  | 77.246 | 93.038 | 41.838 | 1.00 | 0.00 | C    |
| ATOM   | 2849 | CG ASN A1010  | 77.855 | 94.331 | 41.303 | 1.00 | 0.00 | C    |
| ATOM   | 2850 | ND2 ASN A1010 | 77.879 | 94.480 | 39.952 | 1.00 | 0.00 | N    |
| ATOM   | 2851 | OD1 ASN A1010 | 78.310 | 95.181 | 42.066 | 1.00 | 0.00 | O    |
| ATOM   | 2852 | OXT ASN A1010 | 76.238 | 95.060 | 43.528 | 1.00 | 0.00 | O1-  |
| HETATM | 2853 | CA CA1 A1011  | 71.453 | 84.169 | 52.398 | 1.00 | 0.00 | CA2+ |

| TER 2854 CA1 A1011 |      |     |           |        |        |        |      |      |     |
|--------------------|------|-----|-----------|--------|--------|--------|------|------|-----|
| ATOM               | 2855 | N   | GLN B 671 | 60.322 | 51.926 | 26.784 | 1.00 | 0.00 | N1+ |
| ATOM               | 2856 | CA  | GLN B 671 | 59.764 | 52.901 | 25.884 | 1.00 | 0.00 | C   |
| ATOM               | 2857 | C   | GLN B 671 | 58.872 | 53.855 | 26.619 | 1.00 | 0.00 | C   |
| ATOM               | 2858 | O   | GLN B 671 | 58.239 | 53.537 | 27.624 | 1.00 | 0.00 | O   |
| ATOM               | 2859 | CB  | GLN B 671 | 58.924 | 52.251 | 24.773 | 1.00 | 0.00 | C   |
| ATOM               | 2860 | CG  | GLN B 671 | 57.703 | 51.512 | 25.324 | 1.00 | 0.00 | C   |
| ATOM               | 2861 | CD  | GLN B 671 | 56.996 | 50.805 | 24.175 | 1.00 | 0.00 | C   |
| ATOM               | 2862 | NE2 | GLN B 671 | 55.986 | 49.962 | 24.516 | 1.00 | 0.00 | N   |
| ATOM               | 2863 | OE1 | GLN B 671 | 57.338 | 50.992 | 23.008 | 1.00 | 0.00 | O   |
| ATOM               | 2864 | N   | PRO B 672 | 58.872 | 55.063 | 26.114 | 1.00 | 0.00 | N   |
| ATOM               | 2865 | CA  | PRO B 672 | 58.074 | 56.113 | 26.686 | 1.00 | 0.00 | C   |
| ATOM               | 2866 | C   | PRO B 672 | 56.597 | 55.934 | 26.520 | 1.00 | 0.00 | C   |
| ATOM               | 2867 | O   | PRO B 672 | 55.851 | 56.526 | 27.297 | 1.00 | 0.00 | O   |
| ATOM               | 2868 | CB  | PRO B 672 | 58.599 | 57.410 | 26.076 | 1.00 | 0.00 | C   |
| ATOM               | 2869 | CG  | PRO B 672 | 60.069 | 57.095 | 25.762 | 1.00 | 0.00 | C   |
| ATOM               | 2870 | CD  | PRO B 672 | 60.082 | 55.581 | 25.494 | 1.00 | 0.00 | C   |
| ATOM               | 2871 | N   | GLY B 673 | 56.140 | 55.167 | 25.510 | 1.00 | 0.00 | N   |
| ATOM               | 2872 | CA  | GLY B 673 | 54.723 | 55.072 | 25.308 | 1.00 | 0.00 | C   |
| ATOM               | 2873 | C   | GLY B 673 | 54.070 | 54.409 | 26.480 | 1.00 | 0.00 | C   |
| ATOM               | 2874 | O   | GLY B 673 | 53.111 | 54.931 | 27.048 | 1.00 | 0.00 | O   |
| ATOM               | 2875 | N   | VAL B 674 | 54.595 | 53.242 | 26.888 | 1.00 | 0.00 | N   |
| ATOM               | 2876 | CA  | VAL B 674 | 54.024 | 52.513 | 27.976 | 1.00 | 0.00 | C   |
| ATOM               | 2877 | C   | VAL B 674 | 54.199 | 53.319 | 29.215 | 1.00 | 0.00 | C   |
| ATOM               | 2878 | O   | VAL B 674 | 53.318 | 53.352 | 30.072 | 1.00 | 0.00 | O   |
| ATOM               | 2879 | CB  | VAL B 674 | 54.686 | 51.183 | 28.192 | 1.00 | 0.00 | C   |
| ATOM               | 2880 | CG1 | VAL B 674 | 56.177 | 51.421 | 28.484 | 1.00 | 0.00 | C   |
| ATOM               | 2881 | CG2 | VAL B 674 | 53.944 | 50.443 | 29.321 | 1.00 | 0.00 | C   |
| ATOM               | 2882 | N   | GLN B 675 | 55.354 | 53.996 | 29.342 | 1.00 | 0.00 | N   |
| ATOM               | 2883 | CA  | GLN B 675 | 55.633 | 54.761 | 30.520 | 1.00 | 0.00 | C   |
| ATOM               | 2884 | C   | GLN B 675 | 54.619 | 55.857 | 30.627 | 1.00 | 0.00 | C   |
| ATOM               | 2885 | O   | GLN B 675 | 54.137 | 56.156 | 31.718 | 1.00 | 0.00 | O   |
| ATOM               | 2886 | CB  | GLN B 675 | 57.027 | 55.407 | 30.503 | 1.00 | 0.00 | C   |
| ATOM               | 2887 | CG  | GLN B 675 | 58.166 | 54.381 | 30.526 | 1.00 | 0.00 | C   |
| ATOM               | 2888 | CD  | GLN B 675 | 58.137 | 53.671 | 31.870 | 1.00 | 0.00 | C   |
| ATOM               | 2889 | NE2 | GLN B 675 | 58.738 | 52.451 | 31.925 | 1.00 | 0.00 | N   |
| ATOM               | 2890 | OE1 | GLN B 675 | 57.594 | 54.183 | 32.848 | 1.00 | 0.00 | O   |
| ATOM               | 2891 | N   | ASN B 676 | 54.265 | 56.479 | 29.490 | 1.00 | 0.00 | N   |
| ATOM               | 2892 | CA  | ASN B 676 | 53.303 | 57.543 | 29.500 | 1.00 | 0.00 | C   |
| ATOM               | 2893 | C   | ASN B 676 | 52.022 | 56.954 | 29.995 | 1.00 | 0.00 | C   |
| ATOM               | 2894 | O   | ASN B 676 | 51.268 | 57.590 | 30.727 | 1.00 | 0.00 | O   |
| ATOM               | 2895 | CB  | ASN B 676 | 53.052 | 58.133 | 28.102 | 1.00 | 0.00 | C   |
| ATOM               | 2896 | CG  | ASN B 676 | 52.187 | 59.378 | 28.259 | 1.00 | 0.00 | C   |
| ATOM               | 2897 | ND2 | ASN B 676 | 52.650 | 60.514 | 27.674 | 1.00 | 0.00 | N   |



|      |      |               |        |        |        |      |      |     |
|------|------|---------------|--------|--------|--------|------|------|-----|
| ATOM | 2898 | OD1 ASN B 676 | 51.132 | 59.339 | 28.889 | 1.00 | 0.00 | O   |
| ATOM | 2899 | N PHE B 677   | 51.769 | 55.695 | 29.604 | 1.00 | 0.00 | N   |
| ATOM | 2900 | CA PHE B 677  | 50.595 | 54.974 | 29.991 | 1.00 | 0.00 | C   |
| ATOM | 2901 | C PHE B 677   | 50.595 | 54.858 | 31.481 | 1.00 | 0.00 | C   |
| ATOM | 2902 | O PHE B 677   | 49.555 | 55.017 | 32.117 | 1.00 | 0.00 | O   |
| ATOM | 2903 | CB PHE B 677  | 50.578 | 53.550 | 29.409 | 1.00 | 0.00 | C   |
| ATOM | 2904 | CG PHE B 677  | 49.348 | 52.845 | 29.870 | 1.00 | 0.00 | C   |
| ATOM | 2905 | CD1 PHE B 677 | 48.155 | 52.998 | 29.200 | 1.00 | 0.00 | C   |
| ATOM | 2906 | CD2 PHE B 677 | 49.394 | 52.025 | 30.973 | 1.00 | 0.00 | C   |
| ATOM | 2907 | CE1 PHE B 677 | 47.026 | 52.343 | 29.632 | 1.00 | 0.00 | C   |
| ATOM | 2908 | CE2 PHE B 677 | 48.268 | 51.370 | 31.408 | 1.00 | 0.00 | C   |
| ATOM | 2909 | CZ PHE B 677  | 47.080 | 51.529 | 30.737 | 1.00 | 0.00 | C   |
| ATOM | 2910 | N LEU B 678   | 51.770 | 54.583 | 32.088 | 1.00 | 0.00 | N   |
| ATOM | 2911 | CA LEU B 678  | 51.800 | 54.439 | 33.518 | 1.00 | 0.00 | C   |
| ATOM | 2912 | C LEU B 678   | 51.310 | 55.710 | 34.117 | 1.00 | 0.00 | C   |
| ATOM | 2913 | O LEU B 678   | 50.471 | 55.709 | 35.016 | 1.00 | 0.00 | O   |
| ATOM | 2914 | CB LEU B 678  | 53.199 | 54.334 | 34.146 | 1.00 | 0.00 | C   |
| ATOM | 2915 | CG LEU B 678  | 53.994 | 53.033 | 33.967 | 1.00 | 0.00 | C   |
| ATOM | 2916 | CD1 LEU B 678 | 54.420 | 52.797 | 32.515 | 1.00 | 0.00 | C   |
| ATOM | 2917 | CD2 LEU B 678 | 55.177 | 53.030 | 34.951 | 1.00 | 0.00 | C   |
| ATOM | 2918 | N SER B 679   | 51.837 | 56.833 | 33.609 | 1.00 | 0.00 | N   |
| ATOM | 2919 | CA SER B 679  | 51.543 | 58.125 | 34.152 | 1.00 | 0.00 | C   |
| ATOM | 2920 | C SER B 679   | 50.077 | 58.388 | 34.034 | 1.00 | 0.00 | C   |
| ATOM | 2921 | O SER B 679   | 49.459 | 58.919 | 34.957 | 1.00 | 0.00 | O   |
| ATOM | 2922 | CB SER B 679  | 52.273 | 59.248 | 33.398 | 1.00 | 0.00 | C   |
| ATOM | 2923 | OG SER B 679  | 51.946 | 60.509 | 33.961 | 1.00 | 0.00 | O   |
| ATOM | 2924 | N LYS B 680   | 49.472 | 58.014 | 32.895 | 1.00 | 0.00 | N   |
| ATOM | 2925 | CA LYS B 680  | 48.079 | 58.285 | 32.712 | 1.00 | 0.00 | C   |
| ATOM | 2926 | C LYS B 680   | 47.325 | 57.531 | 33.755 | 1.00 | 0.00 | C   |
| ATOM | 2927 | O LYS B 680   | 46.390 | 58.058 | 34.355 | 1.00 | 0.00 | O   |
| ATOM | 2928 | CB LYS B 680  | 47.577 | 57.840 | 31.325 | 1.00 | 0.00 | C   |
| ATOM | 2929 | CG LYS B 680  | 46.108 | 58.169 | 31.015 | 1.00 | 0.00 | C   |
| ATOM | 2930 | CD LYS B 680  | 45.077 | 57.407 | 31.855 | 1.00 | 0.00 | C   |
| ATOM | 2931 | CE LYS B 680  | 43.624 | 57.719 | 31.483 | 1.00 | 0.00 | C   |
| ATOM | 2932 | NZ LYS B 680  | 42.703 | 56.904 | 32.304 | 1.00 | 0.00 | NI+ |
| ATOM | 2933 | N GLN B 681   | 47.716 | 56.267 | 33.995 | 1.00 | 0.00 | N   |
| ATOM | 2934 | CA GLN B 681  | 47.033 | 55.445 | 34.948 | 1.00 | 0.00 | C   |
| ATOM | 2935 | C GLN B 681   | 47.231 | 55.995 | 36.329 | 1.00 | 0.00 | C   |
| ATOM | 2936 | O GLN B 681   | 46.307 | 56.002 | 37.138 | 1.00 | 0.00 | O   |
| ATOM | 2937 | CB GLN B 681  | 47.533 | 53.989 | 34.926 | 1.00 | 0.00 | C   |
| ATOM | 2938 | CG GLN B 681  | 46.827 | 53.077 | 35.932 | 1.00 | 0.00 | C   |
| ATOM | 2939 | CD GLN B 681  | 47.283 | 51.648 | 35.663 | 1.00 | 0.00 | C   |
| ATOM | 2940 | NE2 GLN B 681 | 48.173 | 51.112 | 36.538 | 1.00 | 0.00 | N   |
| ATOM | 2941 | OE1 GLN B 681 | 46.858 | 51.025 | 34.692 | 1.00 | 0.00 | O   |

|      |      |     |           |        |        |        |      |      |   |
|------|------|-----|-----------|--------|--------|--------|------|------|---|
| ATOM | 2942 | N   | TRP B 682 | 48.453 | 56.473 | 36.620 | 1.00 | 0.00 | N |
| ATOM | 2943 | CA  | TRP B 682 | 48.821 | 56.958 | 37.921 | 1.00 | 0.00 | C |
| ATOM | 2944 | C   | TRP B 682 | 47.971 | 58.136 | 38.298 | 1.00 | 0.00 | C |
| ATOM | 2945 | O   | TRP B 682 | 47.393 | 58.174 | 39.383 | 1.00 | 0.00 | O |
| ATOM | 2946 | CB  | TRP B 682 | 50.285 | 57.428 | 37.940 | 1.00 | 0.00 | C |
| ATOM | 2947 | CG  | TRP B 682 | 50.782 | 57.942 | 39.269 | 1.00 | 0.00 | C |
| ATOM | 2948 | CD1 | TRP B 682 | 50.733 | 59.206 | 39.781 | 1.00 | 0.00 | C |
| ATOM | 2949 | CD2 | TRP B 682 | 51.459 | 57.134 | 40.241 | 1.00 | 0.00 | C |
| ATOM | 2950 | CE2 | TRP B 682 | 51.786 | 57.965 | 41.312 | 1.00 | 0.00 | C |
| ATOM | 2951 | CE3 | TRP B 682 | 51.788 | 55.809 | 40.242 | 1.00 | 0.00 | C |
| ATOM | 2952 | NE1 | TRP B 682 | 51.334 | 59.236 | 41.018 | 1.00 | 0.00 | N |
| ATOM | 2953 | CZ2 | TRP B 682 | 52.451 | 57.482 | 42.405 | 1.00 | 0.00 | C |
| ATOM | 2954 | CZ3 | TRP B 682 | 52.454 | 55.323 | 41.345 | 1.00 | 0.00 | C |
| ATOM | 2955 | CH2 | TRP B 682 | 52.778 | 56.145 | 42.407 | 1.00 | 0.00 | C |
| ATOM | 2956 | N   | TYR B 683 | 47.876 | 59.133 | 37.398 | 1.00 | 0.00 | N |
| ATOM | 2957 | CA  | TYR B 683 | 47.124 | 60.335 | 37.639 | 1.00 | 0.00 | C |
| ATOM | 2958 | C   | TYR B 683 | 45.675 | 60.011 | 37.738 | 1.00 | 0.00 | C |
| ATOM | 2959 | O   | TYR B 683 | 44.942 | 60.652 | 38.492 | 1.00 | 0.00 | O |
| ATOM | 2960 | CB  | TYR B 683 | 47.267 | 61.402 | 36.541 | 1.00 | 0.00 | C |
| ATOM | 2961 | CG  | TYR B 683 | 48.626 | 62.000 | 36.635 | 1.00 | 0.00 | C |
| ATOM | 2962 | CD1 | TYR B 683 | 48.949 | 62.829 | 37.685 | 1.00 | 0.00 | C |
| ATOM | 2963 | CD2 | TYR B 683 | 49.569 | 61.756 | 35.665 | 1.00 | 0.00 | C |
| ATOM | 2964 | CE1 | TYR B 683 | 50.198 | 63.394 | 37.774 | 1.00 | 0.00 | C |
| ATOM | 2965 | CE2 | TYR B 683 | 50.820 | 62.319 | 35.750 | 1.00 | 0.00 | C |
| ATOM | 2966 | CZ  | TYR B 683 | 51.136 | 63.137 | 36.806 | 1.00 | 0.00 | C |
| ATOM | 2967 | OH  | TYR B 683 | 52.422 | 63.714 | 36.888 | 1.00 | 0.00 | O |
| ATOM | 2968 | N   | GLY B 684 | 45.204 | 59.036 | 36.942 | 1.00 | 0.00 | N |
| ATOM | 2969 | CA  | GLY B 684 | 43.813 | 58.718 | 36.983 | 1.00 | 0.00 | C |
| ATOM | 2970 | C   | GLY B 684 | 43.104 | 59.726 | 36.144 | 1.00 | 0.00 | C |
| ATOM | 2971 | O   | GLY B 684 | 43.618 | 60.170 | 35.117 | 1.00 | 0.00 | O |
| ATOM | 2972 | N   | GLU B 685 | 41.889 | 60.099 | 36.577 | 1.00 | 0.00 | N |
| ATOM | 2973 | CA  | GLU B 685 | 41.041 | 61.032 | 35.907 | 1.00 | 0.00 | C |
| ATOM | 2974 | C   | GLU B 685 | 41.726 | 62.356 | 35.854 | 1.00 | 0.00 | C |
| ATOM | 2975 | O   | GLU B 685 | 41.614 | 63.077 | 34.865 | 1.00 | 0.00 | O |
| ATOM | 2976 | CB  | GLU B 685 | 39.721 | 61.232 | 36.674 | 1.00 | 0.00 | C |
| ATOM | 2977 | CG  | GLU B 685 | 38.923 | 62.476 | 36.278 | 1.00 | 0.00 | C |
| ATOM | 2978 | CD  | GLU B 685 | 38.134 | 62.206 | 35.009 | 1.00 | 0.00 | C |
| ATOM | 2979 | OE1 | GLU B 685 | 37.682 | 61.044 | 34.816 | 1.00 | 0.00 | O |
| ATOM | 2980 | OE2 | GLU B 685 | 37.969 | 63.170 | 34.219 | 1.00 | 0.00 | O |
| ATOM | 2981 | N   | ILE B 686 | 42.449 | 62.720 | 36.927 | 1.00 | 0.00 | N |
| ATOM | 2982 | CA  | ILE B 686 | 43.072 | 64.007 | 36.955 | 1.00 | 0.00 | C |
| ATOM | 2983 | C   | ILE B 686 | 44.104 | 64.061 | 35.880 | 1.00 | 0.00 | C |
| ATOM | 2984 | O   | ILE B 686 | 44.902 | 63.143 | 35.707 | 1.00 | 0.00 | O |
| ATOM | 2985 | CB  | ILE B 686 | 43.725 | 64.332 | 38.271 | 1.00 | 0.00 | C |

|      |      |               |        |        |        |      |      |     |
|------|------|---------------|--------|--------|--------|------|------|-----|
| ATOM | 2986 | CG1 ILE B 686 | 42.682 | 64.340 | 39.405 | 1.00 | 0.00 | C   |
| ATOM | 2987 | CG2 ILE B 686 | 44.442 | 65.679 | 38.112 | 1.00 | 0.00 | C   |
| ATOM | 2988 | CD1 ILE B 686 | 42.100 | 62.961 | 39.720 | 1.00 | 0.00 | C   |
| ATOM | 2989 | N SER B 687   | 44.082 | 65.162 | 35.104 | 1.00 | 0.00 | N   |
| ATOM | 2990 | CA SER B 687  | 44.997 | 65.337 | 34.018 | 1.00 | 0.00 | C   |
| ATOM | 2991 | C SER B 687   | 46.328 | 65.703 | 34.584 | 1.00 | 0.00 | C   |
| ATOM | 2992 | O SER B 687   | 46.442 | 66.162 | 35.721 | 1.00 | 0.00 | O   |
| ATOM | 2993 | CB SER B 687  | 44.579 | 66.443 | 33.036 | 1.00 | 0.00 | C   |
| ATOM | 2994 | OG SER B 687  | 45.531 | 66.558 | 31.990 | 1.00 | 0.00 | O   |
| ATOM | 2995 | N ARG B 688   | 47.381 | 65.493 | 33.773 | 1.00 | 0.00 | N   |
| ATOM | 2996 | CA ARG B 688  | 48.739 | 65.746 | 34.149 | 1.00 | 0.00 | C   |
| ATOM | 2997 | C ARG B 688   | 49.047 | 67.194 | 33.933 | 1.00 | 0.00 | C   |
| ATOM | 2998 | O ARG B 688   | 48.176 | 67.988 | 33.582 | 1.00 | 0.00 | O   |
| ATOM | 2999 | CB ARG B 688  | 49.750 | 64.916 | 33.340 | 1.00 | 0.00 | C   |
| ATOM | 3000 | CG ARG B 688  | 49.679 | 65.164 | 31.833 | 1.00 | 0.00 | C   |
| ATOM | 3001 | CD ARG B 688  | 50.491 | 64.150 | 31.022 | 1.00 | 0.00 | C   |
| ATOM | 3002 | NE ARG B 688  | 49.685 | 62.900 | 30.939 | 1.00 | 0.00 | N   |
| ATOM | 3003 | CZ ARG B 688  | 50.304 | 61.690 | 30.813 | 1.00 | 0.00 | C   |
| ATOM | 3004 | NH1 ARG B 688 | 51.667 | 61.611 | 30.823 | 1.00 | 0.00 | N   |
| ATOM | 3005 | NH2 ARG B 688 | 49.557 | 60.554 | 30.674 | 1.00 | 0.00 | N   |
| ATOM | 3006 | N ASP B 689   | 50.323 | 67.552 | 34.168 | 1.00 | 0.00 | N   |
| ATOM | 3007 | CA ASP B 689  | 50.829 | 68.885 | 34.028 | 1.00 | 0.00 | C   |
| ATOM | 3008 | C ASP B 689   | 50.124 | 69.810 | 34.965 | 1.00 | 0.00 | C   |
| ATOM | 3009 | O ASP B 689   | 49.769 | 70.931 | 34.602 | 1.00 | 0.00 | O   |
| ATOM | 3010 | CB ASP B 689  | 50.696 | 69.453 | 32.603 | 1.00 | 0.00 | C   |
| ATOM | 3011 | CG ASP B 689  | 51.565 | 70.700 | 32.519 | 1.00 | 0.00 | C   |
| ATOM | 3012 | OD1 ASP B 689 | 52.254 | 71.011 | 33.527 | 1.00 | 0.00 | O   |
| ATOM | 3013 | OD2 ASP B 689 | 51.553 | 71.356 | 31.443 | 1.00 | 0.00 | O   |
| ATOM | 3014 | N THR B 690   | 49.899 | 69.350 | 36.211 | 1.00 | 0.00 | N   |
| ATOM | 3015 | CA THR B 690  | 49.335 | 70.197 | 37.221 | 1.00 | 0.00 | C   |
| ATOM | 3016 | C THR B 690   | 50.323 | 70.186 | 38.342 | 1.00 | 0.00 | C   |
| ATOM | 3017 | O THR B 690   | 51.167 | 69.295 | 38.426 | 1.00 | 0.00 | O   |
| ATOM | 3018 | CB THR B 690  | 48.024 | 69.717 | 37.782 | 1.00 | 0.00 | C   |
| ATOM | 3019 | CG2 THR B 690 | 47.001 | 69.628 | 36.637 | 1.00 | 0.00 | C   |
| ATOM | 3020 | OG1 THR B 690 | 48.182 | 68.454 | 38.409 | 1.00 | 0.00 | O   |
| ATOM | 3021 | N LYS B 691   | 50.265 | 71.200 | 39.226 | 1.00 | 0.00 | N   |
| ATOM | 3022 | CA LYS B 691  | 51.208 | 71.243 | 40.305 | 1.00 | 0.00 | C   |
| ATOM | 3023 | C LYS B 691   | 50.857 | 70.176 | 41.288 | 1.00 | 0.00 | C   |
| ATOM | 3024 | O LYS B 691   | 49.692 | 69.927 | 41.591 | 1.00 | 0.00 | O   |
| ATOM | 3025 | CB LYS B 691  | 51.219 | 72.581 | 41.057 | 1.00 | 0.00 | C   |
| ATOM | 3026 | CG LYS B 691  | 51.854 | 73.710 | 40.252 | 1.00 | 0.00 | C   |
| ATOM | 3027 | CD LYS B 691  | 51.530 | 75.104 | 40.784 | 1.00 | 0.00 | C   |
| ATOM | 3028 | CE LYS B 691  | 52.278 | 76.225 | 40.063 | 1.00 | 0.00 | C   |
| ATOM | 3029 | NZ LYS B 691  | 51.904 | 77.536 | 40.635 | 1.00 | 0.00 | N1+ |

|      |      |     |           |        |        |        |      |      |     |
|------|------|-----|-----------|--------|--------|--------|------|------|-----|
| ATOM | 3030 | N   | ASN B 692 | 51.883 | 69.484 | 41.802 | 1.00 | 0.00 | N   |
| ATOM | 3031 | CA  | ASN B 692 | 51.644 | 68.443 | 42.751 | 1.00 | 0.00 | C   |
| ATOM | 3032 | C   | ASN B 692 | 51.171 | 69.051 | 44.033 | 1.00 | 0.00 | C   |
| ATOM | 3033 | O   | ASN B 692 | 50.270 | 68.530 | 44.684 | 1.00 | 0.00 | O   |
| ATOM | 3034 | CB  | ASN B 692 | 52.901 | 67.618 | 43.060 | 1.00 | 0.00 | C   |
| ATOM | 3035 | CG  | ASN B 692 | 52.456 | 66.334 | 43.743 | 1.00 | 0.00 | C   |
| ATOM | 3036 | ND2 | ASN B 692 | 52.919 | 65.175 | 43.204 | 1.00 | 0.00 | N   |
| ATOM | 3037 | OD1 | ASN B 692 | 51.710 | 66.359 | 44.720 | 1.00 | 0.00 | O   |
| ATOM | 3038 | N   | TRP B 693 | 51.771 | 70.193 | 44.421 | 1.00 | 0.00 | N   |
| ATOM | 3039 | CA  | TRP B 693 | 51.450 | 70.779 | 45.688 | 1.00 | 0.00 | C   |
| ATOM | 3040 | C   | TRP B 693 | 50.005 | 71.149 | 45.693 | 1.00 | 0.00 | C   |
| ATOM | 3041 | O   | TRP B 693 | 49.302 | 70.932 | 46.677 | 1.00 | 0.00 | O   |
| ATOM | 3042 | CB  | TRP B 693 | 52.259 | 72.053 | 46.003 | 1.00 | 0.00 | C   |
| ATOM | 3043 | CG  | TRP B 693 | 51.990 | 73.239 | 45.104 | 1.00 | 0.00 | C   |
| ATOM | 3044 | CD1 | TRP B 693 | 52.621 | 73.637 | 43.962 | 1.00 | 0.00 | C   |
| ATOM | 3045 | CD2 | TRP B 693 | 50.970 | 74.214 | 45.365 | 1.00 | 0.00 | C   |
| ATOM | 3046 | CE2 | TRP B 693 | 51.041 | 75.170 | 44.351 | 1.00 | 0.00 | C   |
| ATOM | 3047 | CE3 | TRP B 693 | 50.052 | 74.312 | 46.371 | 1.00 | 0.00 | C   |
| ATOM | 3048 | NE1 | TRP B 693 | 52.059 | 74.802 | 43.497 | 1.00 | 0.00 | N   |
| ATOM | 3049 | CZ2 | TRP B 693 | 50.193 | 76.237 | 44.326 | 1.00 | 0.00 | C   |
| ATOM | 3050 | CZ3 | TRP B 693 | 49.194 | 75.389 | 46.341 | 1.00 | 0.00 | C   |
| ATOM | 3051 | CH2 | TRP B 693 | 49.263 | 76.334 | 45.338 | 1.00 | 0.00 | C   |
| ATOM | 3052 | N   | LYS B 694 | 49.520 | 71.713 | 44.573 | 1.00 | 0.00 | N   |
| ATOM | 3053 | CA  | LYS B 694 | 48.160 | 72.155 | 44.516 | 1.00 | 0.00 | C   |
| ATOM | 3054 | C   | LYS B 694 | 47.252 | 70.976 | 44.669 | 1.00 | 0.00 | C   |
| ATOM | 3055 | O   | LYS B 694 | 46.196 | 71.086 | 45.294 | 1.00 | 0.00 | O   |
| ATOM | 3056 | CB  | LYS B 694 | 47.821 | 72.893 | 43.209 | 1.00 | 0.00 | C   |
| ATOM | 3057 | CG  | LYS B 694 | 47.978 | 72.009 | 41.983 | 1.00 | 0.00 | C   |
| ATOM | 3058 | CD  | LYS B 694 | 47.588 | 72.665 | 40.665 | 1.00 | 0.00 | C   |
| ATOM | 3059 | CE  | LYS B 694 | 48.603 | 73.692 | 40.168 | 1.00 | 0.00 | C   |
| ATOM | 3060 | NZ  | LYS B 694 | 48.346 | 73.991 | 38.744 | 1.00 | 0.00 | NI+ |
| ATOM | 3061 | N   | ILE B 695 | 47.632 | 69.813 | 44.115 | 1.00 | 0.00 | N   |
| ATOM | 3062 | CA  | ILE B 695 | 46.799 | 68.649 | 44.200 | 1.00 | 0.00 | C   |
| ATOM | 3063 | C   | ILE B 695 | 46.662 | 68.297 | 45.649 | 1.00 | 0.00 | C   |
| ATOM | 3064 | O   | ILE B 695 | 45.569 | 68.015 | 46.138 | 1.00 | 0.00 | O   |
| ATOM | 3065 | CB  | ILE B 695 | 47.442 | 67.425 | 43.613 | 1.00 | 0.00 | C   |
| ATOM | 3066 | CG1 | ILE B 695 | 47.995 | 67.656 | 42.205 | 1.00 | 0.00 | C   |
| ATOM | 3067 | CG2 | ILE B 695 | 46.389 | 66.310 | 43.656 | 1.00 | 0.00 | C   |
| ATOM | 3068 | CD1 | ILE B 695 | 48.893 | 66.509 | 41.737 | 1.00 | 0.00 | C   |
| ATOM | 3069 | N   | ILE B 696 | 47.797 | 68.298 | 46.371 | 1.00 | 0.00 | N   |
| ATOM | 3070 | CA  | ILE B 696 | 47.818 | 67.912 | 47.750 | 1.00 | 0.00 | C   |
| ATOM | 3071 | C   | ILE B 696 | 47.013 | 68.889 | 48.537 | 1.00 | 0.00 | C   |
| ATOM | 3072 | O   | ILE B 696 | 46.235 | 68.501 | 49.409 | 1.00 | 0.00 | O   |
| ATOM | 3073 | CB  | ILE B 696 | 49.202 | 67.882 | 48.331 | 1.00 | 0.00 | C   |

|      |      |               |        |        |        |      |      |   |
|------|------|---------------|--------|--------|--------|------|------|---|
| ATOM | 3074 | CG1 ILE B 696 | 50.069 | 66.848 | 47.593 | 1.00 | 0.00 | C |
| ATOM | 3075 | CG2 ILE B 696 | 49.077 | 67.612 | 49.841 | 1.00 | 0.00 | C |
| ATOM | 3076 | CD1 ILE B 696 | 51.555 | 66.939 | 47.938 | 1.00 | 0.00 | C |
| ATOM | 3077 | N LEU B 697   | 47.165 | 70.192 | 48.244 | 1.00 | 0.00 | N |
| ATOM | 3078 | CA LEU B 697  | 46.448 | 71.171 | 49.003 | 1.00 | 0.00 | C |
| ATOM | 3079 | C LEU B 697   | 45.007 | 70.877 | 48.786 | 1.00 | 0.00 | C |
| ATOM | 3080 | O LEU B 697   | 44.230 | 70.820 | 49.735 | 1.00 | 0.00 | O |
| ATOM | 3081 | CB LEU B 697  | 46.737 | 72.613 | 48.528 | 1.00 | 0.00 | C |
| ATOM | 3082 | CG LEU B 697  | 46.191 | 73.754 | 49.422 | 1.00 | 0.00 | C |
| ATOM | 3083 | CD1 LEU B 697 | 46.556 | 75.123 | 48.825 | 1.00 | 0.00 | C |
| ATOM | 3084 | CD2 LEU B 697 | 44.687 | 73.643 | 49.714 | 1.00 | 0.00 | C |
| ATOM | 3085 | N CYS B 698   | 44.634 | 70.606 | 47.524 | 1.00 | 0.00 | N |
| ATOM | 3086 | CA CYS B 698  | 43.267 | 70.378 | 47.181 | 1.00 | 0.00 | C |
| ATOM | 3087 | C CYS B 698   | 42.790 | 69.211 | 47.971 | 1.00 | 0.00 | C |
| ATOM | 3088 | O CYS B 698   | 41.643 | 69.194 | 48.405 | 1.00 | 0.00 | O |
| ATOM | 3089 | CB CYS B 698  | 43.068 | 70.046 | 45.689 | 1.00 | 0.00 | C |
| ATOM | 3090 | SG CYS B 698  | 43.437 | 71.462 | 44.613 | 1.00 | 0.00 | S |
| ATOM | 3091 | N LEU B 699   | 43.676 | 68.231 | 48.214 | 1.00 | 0.00 | N |
| ATOM | 3092 | CA LEU B 699  | 43.315 | 67.009 | 48.872 | 1.00 | 0.00 | C |
| ATOM | 3093 | C LEU B 699   | 42.750 | 67.275 | 50.229 | 1.00 | 0.00 | C |
| ATOM | 3094 | O LEU B 699   | 41.790 | 66.621 | 50.630 | 1.00 | 0.00 | O |
| ATOM | 3095 | CB LEU B 699  | 44.519 | 66.082 | 49.103 | 1.00 | 0.00 | C |
| ATOM | 3096 | CG LEU B 699  | 44.142 | 64.767 | 49.807 | 1.00 | 0.00 | C |
| ATOM | 3097 | CD1 LEU B 699 | 43.384 | 63.823 | 48.864 | 1.00 | 0.00 | C |
| ATOM | 3098 | CD2 LEU B 699 | 45.358 | 64.122 | 50.484 | 1.00 | 0.00 | C |
| ATOM | 3099 | N PHE B 700   | 43.346 | 68.188 | 51.020 | 1.00 | 0.00 | N |
| ATOM | 3100 | CA PHE B 700  | 42.786 | 68.371 | 52.328 | 1.00 | 0.00 | C |
| ATOM | 3101 | C PHE B 700   | 41.433 | 69.029 | 52.241 | 1.00 | 0.00 | C |
| ATOM | 3102 | O PHE B 700   | 40.456 | 68.558 | 52.816 | 1.00 | 0.00 | O |
| ATOM | 3103 | CB PHE B 700  | 43.647 | 69.230 | 53.268 | 1.00 | 0.00 | C |
| ATOM | 3104 | CG PHE B 700  | 43.087 | 69.019 | 54.629 | 1.00 | 0.00 | C |
| ATOM | 3105 | CD1 PHE B 700 | 43.533 | 67.970 | 55.402 | 1.00 | 0.00 | C |
| ATOM | 3106 | CD2 PHE B 700 | 42.110 | 69.847 | 55.134 | 1.00 | 0.00 | C |
| ATOM | 3107 | CE1 PHE B 700 | 43.026 | 67.753 | 56.660 | 1.00 | 0.00 | C |
| ATOM | 3108 | CE2 PHE B 700 | 41.599 | 69.632 | 56.392 | 1.00 | 0.00 | C |
| ATOM | 3109 | CZ PHE B 700  | 42.055 | 68.586 | 57.157 | 1.00 | 0.00 | C |
| ATOM | 3110 | N ILE B 701   | 41.397 | 70.146 | 51.490 | 1.00 | 0.00 | N |
| ATOM | 3111 | CA ILE B 701  | 40.365 | 71.110 | 51.191 | 1.00 | 0.00 | C |
| ATOM | 3112 | C ILE B 701   | 39.271 | 70.614 | 50.264 | 1.00 | 0.00 | C |
| ATOM | 3113 | O ILE B 701   | 38.294 | 71.318 | 50.024 | 1.00 | 0.00 | O |
| ATOM | 3114 | CB ILE B 701  | 40.926 | 72.475 | 50.827 | 1.00 | 0.00 | C |
| ATOM | 3115 | CG1 ILE B 701 | 39.820 | 73.514 | 50.575 | 1.00 | 0.00 | C |
| ATOM | 3116 | CG2 ILE B 701 | 41.972 | 72.340 | 49.719 | 1.00 | 0.00 | C |
| ATOM | 3117 | CD1 ILE B 701 | 39.020 | 73.873 | 51.824 | 1.00 | 0.00 | C |

|      |      |     |           |        |        |        |      |      |   |
|------|------|-----|-----------|--------|--------|--------|------|------|---|
| ATOM | 3118 | N   | ILE B 702 | 39.386 | 69.395 | 49.698 | 1.00 | 0.00 | N |
| ATOM | 3119 | CA  | ILE B 702 | 38.635 | 68.967 | 48.541 | 1.00 | 0.00 | C |
| ATOM | 3120 | C   | ILE B 702 | 37.169 | 69.303 | 48.530 | 1.00 | 0.00 | C |
| ATOM | 3121 | O   | ILE B 702 | 36.771 | 69.835 | 47.496 | 1.00 | 0.00 | O |
| ATOM | 3122 | CB  | ILE B 702 | 38.651 | 67.472 | 48.317 | 1.00 | 0.00 | C |
| ATOM | 3123 | CG1 | ILE B 702 | 37.979 | 66.745 | 49.491 | 1.00 | 0.00 | C |
| ATOM | 3124 | CG2 | ILE B 702 | 40.081 | 66.986 | 48.042 | 1.00 | 0.00 | C |
| ATOM | 3125 | CD1 | ILE B 702 | 37.671 | 65.274 | 49.212 | 1.00 | 0.00 | C |
| ATOM | 3126 | N   | PRO B 703 | 36.325 | 69.067 | 49.506 | 1.00 | 0.00 | N |
| ATOM | 3127 | CA  | PRO B 703 | 34.909 | 69.328 | 49.343 | 1.00 | 0.00 | C |
| ATOM | 3128 | C   | PRO B 703 | 34.580 | 70.704 | 48.829 | 1.00 | 0.00 | C |
| ATOM | 3129 | O   | PRO B 703 | 33.811 | 70.801 | 47.873 | 1.00 | 0.00 | O |
| ATOM | 3130 | CB  | PRO B 703 | 34.301 | 69.102 | 50.723 | 1.00 | 0.00 | C |
| ATOM | 3131 | CG  | PRO B 703 | 35.444 | 69.495 | 51.674 | 1.00 | 0.00 | C |
| ATOM | 3132 | CD  | PRO B 703 | 36.719 | 69.107 | 50.905 | 1.00 | 0.00 | C |
| ATOM | 3133 | N   | LEU B 704 | 35.088 | 71.773 | 49.471 | 1.00 | 0.00 | N |
| ATOM | 3134 | CA  | LEU B 704 | 34.822 | 73.105 | 48.997 | 1.00 | 0.00 | C |
| ATOM | 3135 | C   | LEU B 704 | 35.648 | 73.432 | 47.781 | 1.00 | 0.00 | C |
| ATOM | 3136 | O   | LEU B 704 | 35.124 | 73.798 | 46.732 | 1.00 | 0.00 | O |
| ATOM | 3137 | CB  | LEU B 704 | 35.171 | 74.157 | 50.075 | 1.00 | 0.00 | C |
| ATOM | 3138 | CG  | LEU B 704 | 34.687 | 75.610 | 49.846 | 1.00 | 0.00 | C |
| ATOM | 3139 | CD1 | LEU B 704 | 35.176 | 76.499 | 50.995 | 1.00 | 0.00 | C |
| ATOM | 3140 | CD2 | LEU B 704 | 35.055 | 76.211 | 48.480 | 1.00 | 0.00 | C |
| ATOM | 3141 | N   | VAL B 705 | 36.981 | 73.287 | 47.935 | 1.00 | 0.00 | N |
| ATOM | 3142 | CA  | VAL B 705 | 38.023 | 73.717 | 47.031 | 1.00 | 0.00 | C |
| ATOM | 3143 | C   | VAL B 705 | 38.163 | 72.912 | 45.776 | 1.00 | 0.00 | C |
| ATOM | 3144 | O   | VAL B 705 | 38.561 | 73.444 | 44.741 | 1.00 | 0.00 | O |
| ATOM | 3145 | CB  | VAL B 705 | 39.373 | 73.680 | 47.667 | 1.00 | 0.00 | C |
| ATOM | 3146 | CG1 | VAL B 705 | 39.754 | 72.204 | 47.828 | 1.00 | 0.00 | C |
| ATOM | 3147 | CG2 | VAL B 705 | 40.358 | 74.491 | 46.806 | 1.00 | 0.00 | C |
| ATOM | 3148 | N   | GLY B 706 | 37.869 | 71.604 | 45.833 | 1.00 | 0.00 | N |
| ATOM | 3149 | CA  | GLY B 706 | 38.196 | 70.702 | 44.773 | 1.00 | 0.00 | C |
| ATOM | 3150 | C   | GLY B 706 | 37.545 | 71.085 | 43.482 | 1.00 | 0.00 | C |
| ATOM | 3151 | O   | GLY B 706 | 38.094 | 70.824 | 42.413 | 1.00 | 0.00 | O |
| ATOM | 3152 | N   | CYS B 707 | 36.341 | 71.671 | 43.536 | 1.00 | 0.00 | N |
| ATOM | 3153 | CA  | CYS B 707 | 35.635 | 71.908 | 42.314 | 1.00 | 0.00 | C |
| ATOM | 3154 | C   | CYS B 707 | 36.392 | 72.785 | 41.359 | 1.00 | 0.00 | C |
| ATOM | 3155 | O   | CYS B 707 | 36.600 | 72.409 | 40.206 | 1.00 | 0.00 | O |
| ATOM | 3156 | CB  | CYS B 707 | 34.268 | 72.580 | 42.534 | 1.00 | 0.00 | C |
| ATOM | 3157 | SG  | CYS B 707 | 33.081 | 71.517 | 43.408 | 1.00 | 0.00 | S |
| ATOM | 3158 | N   | GLY B 708 | 36.829 | 73.976 | 41.804 | 1.00 | 0.00 | N |
| ATOM | 3159 | CA  | GLY B 708 | 37.365 | 74.924 | 40.864 | 1.00 | 0.00 | C |
| ATOM | 3160 | C   | GLY B 708 | 38.686 | 74.577 | 40.233 | 1.00 | 0.00 | C |
| ATOM | 3161 | O   | GLY B 708 | 38.799 | 74.562 | 39.007 | 1.00 | 0.00 | O |

|      |      |     |           |        |        |        |      |      |   |
|------|------|-----|-----------|--------|--------|--------|------|------|---|
| ATOM | 3162 | N   | PHE B 709 | 39.723 | 74.286 | 41.041 | 1.00 | 0.00 | N |
| ATOM | 3163 | CA  | PHE B 709 | 41.040 | 74.203 | 40.467 | 1.00 | 0.00 | C |
| ATOM | 3164 | C   | PHE B 709 | 41.297 | 72.989 | 39.638 | 1.00 | 0.00 | C |
| ATOM | 3165 | O   | PHE B 709 | 41.910 | 73.092 | 38.578 | 1.00 | 0.00 | O |
| ATOM | 3166 | CB  | PHE B 709 | 42.195 | 74.282 | 41.476 | 1.00 | 0.00 | C |
| ATOM | 3167 | CG  | PHE B 709 | 43.389 | 74.546 | 40.620 | 1.00 | 0.00 | C |
| ATOM | 3168 | CD1 | PHE B 709 | 43.730 | 75.839 | 40.302 | 1.00 | 0.00 | C |
| ATOM | 3169 | CD2 | PHE B 709 | 44.151 | 73.520 | 40.110 | 1.00 | 0.00 | C |
| ATOM | 3170 | CE1 | PHE B 709 | 44.817 | 76.109 | 39.505 | 1.00 | 0.00 | C |
| ATOM | 3171 | CE2 | PHE B 709 | 45.236 | 73.785 | 39.307 | 1.00 | 0.00 | C |
| ATOM | 3172 | CZ  | PHE B 709 | 45.574 | 75.079 | 39.002 | 1.00 | 0.00 | C |
| ATOM | 3173 | N   | VAL B 710 | 40.842 | 71.804 | 40.086 | 1.00 | 0.00 | N |
| ATOM | 3174 | CA  | VAL B 710 | 41.278 | 70.600 | 39.438 | 1.00 | 0.00 | C |
| ATOM | 3175 | C   | VAL B 710 | 40.935 | 70.605 | 37.980 | 1.00 | 0.00 | C |
| ATOM | 3176 | O   | VAL B 710 | 39.782 | 70.736 | 37.568 | 1.00 | 0.00 | O |
| ATOM | 3177 | CB  | VAL B 710 | 40.699 | 69.350 | 40.034 | 1.00 | 0.00 | C |
| ATOM | 3178 | CG1 | VAL B 710 | 41.116 | 69.273 | 41.503 | 1.00 | 0.00 | C |
| ATOM | 3179 | CG2 | VAL B 710 | 39.180 | 69.360 | 39.838 | 1.00 | 0.00 | C |
| ATOM | 3180 | N   | SER B 711 | 41.980 | 70.447 | 37.146 | 1.00 | 0.00 | N |
| ATOM | 3181 | CA  | SER B 711 | 41.723 | 70.361 | 35.744 | 1.00 | 0.00 | C |
| ATOM | 3182 | C   | SER B 711 | 41.946 | 68.930 | 35.400 | 1.00 | 0.00 | C |
| ATOM | 3183 | O   | SER B 711 | 43.051 | 68.516 | 35.061 | 1.00 | 0.00 | O |
| ATOM | 3184 | CB  | SER B 711 | 42.715 | 71.162 | 34.878 | 1.00 | 0.00 | C |
| ATOM | 3185 | OG  | SER B 711 | 42.621 | 72.549 | 35.163 | 1.00 | 0.00 | O |
| ATOM | 3186 | N   | PHE B 712 | 40.871 | 68.135 | 35.473 | 1.00 | 0.00 | N |
| ATOM | 3187 | CA  | PHE B 712 | 40.935 | 66.742 | 35.166 | 1.00 | 0.00 | C |
| ATOM | 3188 | C   | PHE B 712 | 40.449 | 66.563 | 33.770 | 1.00 | 0.00 | C |
| ATOM | 3189 | O   | PHE B 712 | 40.029 | 67.528 | 33.132 | 1.00 | 0.00 | O |
| ATOM | 3190 | CB  | PHE B 712 | 40.118 | 65.885 | 36.156 | 1.00 | 0.00 | C |
| ATOM | 3191 | CG  | PHE B 712 | 38.736 | 66.444 | 36.249 | 1.00 | 0.00 | C |
| ATOM | 3192 | CD1 | PHE B 712 | 38.510 | 67.611 | 36.943 | 1.00 | 0.00 | C |
| ATOM | 3193 | CD2 | PHE B 712 | 37.665 | 65.800 | 35.677 | 1.00 | 0.00 | C |
| ATOM | 3194 | CE1 | PHE B 712 | 37.242 | 68.136 | 37.042 | 1.00 | 0.00 | C |
| ATOM | 3195 | CE2 | PHE B 712 | 36.395 | 66.320 | 35.771 | 1.00 | 0.00 | C |
| ATOM | 3196 | CZ  | PHE B 712 | 36.180 | 67.491 | 36.454 | 1.00 | 0.00 | C |
| ATOM | 3197 | N   | ARG B 713 | 40.537 | 65.315 | 33.248 | 1.00 | 0.00 | N |
| ATOM | 3198 | CA  | ARG B 713 | 40.036 | 65.028 | 31.931 | 1.00 | 0.00 | C |
| ATOM | 3199 | C   | ARG B 713 | 38.622 | 65.537 | 31.927 | 1.00 | 0.00 | C |
| ATOM | 3200 | O   | ARG B 713 | 37.997 | 65.677 | 32.972 | 1.00 | 0.00 | O |
| ATOM | 3201 | CB  | ARG B 713 | 40.041 | 63.532 | 31.565 | 1.00 | 0.00 | C |
| ATOM | 3202 | CG  | ARG B 713 | 41.458 | 62.989 | 31.336 | 1.00 | 0.00 | C |
| ATOM | 3203 | CD  | ARG B 713 | 41.506 | 61.539 | 30.838 | 1.00 | 0.00 | C |
| ATOM | 3204 | NE  | ARG B 713 | 42.930 | 61.229 | 30.524 | 1.00 | 0.00 | N |
| ATOM | 3205 | CZ  | ARG B 713 | 43.246 | 60.185 | 29.704 | 1.00 | 0.00 | C |

|      |      |               |        |        |        |      |      |     |
|------|------|---------------|--------|--------|--------|------|------|-----|
| ATOM | 3206 | NH1 ARG B 713 | 42.262 | 59.389 | 29.195 | 1.00 | 0.00 | N   |
| ATOM | 3207 | NH2 ARG B 713 | 44.551 | 59.943 | 29.384 | 1.00 | 0.00 | N   |
| ATOM | 3208 | N LYS B 714   | 38.051 | 65.762 | 30.742 | 1.00 | 0.00 | N   |
| ATOM | 3209 | CA LYS B 714  | 36.912 | 66.623 | 30.557 | 1.00 | 0.00 | C   |
| ATOM | 3210 | C LYS B 714   | 35.733 | 66.466 | 31.497 | 1.00 | 0.00 | C   |
| ATOM | 3211 | O LYS B 714   | 35.316 | 67.479 | 32.046 | 1.00 | 0.00 | O   |
| ATOM | 3212 | CB LYS B 714  | 36.373 | 66.502 | 29.122 | 1.00 | 0.00 | C   |
| ATOM | 3213 | CG LYS B 714  | 35.358 | 67.577 | 28.740 | 1.00 | 0.00 | C   |
| ATOM | 3214 | CD LYS B 714  | 35.099 | 67.637 | 27.233 | 1.00 | 0.00 | C   |
| ATOM | 3215 | CE LYS B 714  | 34.078 | 68.699 | 26.827 | 1.00 | 0.00 | C   |
| ATOM | 3216 | NZ LYS B 714  | 33.879 | 68.668 | 25.361 | 1.00 | 0.00 | NI+ |
| ATOM | 3217 | N LYS B 715   | 35.178 | 65.263 | 31.743 | 1.00 | 0.00 | N   |
| ATOM | 3218 | CA LYS B 715  | 33.974 | 65.048 | 32.536 | 1.00 | 0.00 | C   |
| ATOM | 3219 | C LYS B 715   | 32.947 | 66.139 | 32.340 | 1.00 | 0.00 | C   |
| ATOM | 3220 | O LYS B 715   | 32.691 | 66.944 | 33.235 | 1.00 | 0.00 | O   |
| ATOM | 3221 | CB LYS B 715  | 34.272 | 64.973 | 34.039 | 1.00 | 0.00 | C   |
| ATOM | 3222 | CG LYS B 715  | 35.336 | 63.930 | 34.366 | 1.00 | 0.00 | C   |
| ATOM | 3223 | CD LYS B 715  | 34.949 | 62.519 | 33.936 | 1.00 | 0.00 | C   |
| ATOM | 3224 | CE LYS B 715  | 34.367 | 61.702 | 35.085 | 1.00 | 0.00 | C   |
| ATOM | 3225 | NZ LYS B 715  | 33.197 | 62.407 | 35.651 | 1.00 | 0.00 | NI+ |
| ATOM | 3226 | N PRO B 716   | 32.314 | 66.126 | 31.191 | 1.00 | 0.00 | N   |
| ATOM | 3227 | CA PRO B 716  | 31.342 | 67.115 | 30.781 | 1.00 | 0.00 | C   |
| ATOM | 3228 | C PRO B 716   | 29.956 | 67.050 | 31.348 | 1.00 | 0.00 | C   |
| ATOM | 3229 | O PRO B 716   | 29.198 | 67.977 | 31.070 | 1.00 | 0.00 | O   |
| ATOM | 3230 | CB PRO B 716  | 31.305 | 67.058 | 29.253 | 1.00 | 0.00 | C   |
| ATOM | 3231 | CG PRO B 716  | 31.856 | 65.665 | 28.909 | 1.00 | 0.00 | C   |
| ATOM | 3232 | CD PRO B 716  | 32.830 | 65.377 | 30.056 | 1.00 | 0.00 | C   |
| ATOM | 3233 | N VAL B 717   | 29.575 | 66.004 | 32.113 | 1.00 | 0.00 | N   |
| ATOM | 3234 | CA VAL B 717  | 28.191 | 65.873 | 32.500 | 1.00 | 0.00 | C   |
| ATOM | 3235 | C VAL B 717   | 27.707 | 67.110 | 33.185 | 1.00 | 0.00 | C   |
| ATOM | 3236 | O VAL B 717   | 28.346 | 67.634 | 34.094 | 1.00 | 0.00 | O   |
| ATOM | 3237 | CB VAL B 717  | 27.927 | 64.712 | 33.415 | 1.00 | 0.00 | C   |
| ATOM | 3238 | CG1 VAL B 717 | 28.665 | 64.952 | 34.741 | 1.00 | 0.00 | C   |
| ATOM | 3239 | CG2 VAL B 717 | 26.403 | 64.555 | 33.568 | 1.00 | 0.00 | C   |
| ATOM | 3240 | N ASP B 718   | 26.546 | 67.620 | 32.720 | 1.00 | 0.00 | N   |
| ATOM | 3241 | CA ASP B 718  | 25.938 | 68.798 | 33.266 | 1.00 | 0.00 | C   |
| ATOM | 3242 | C ASP B 718   | 24.935 | 68.403 | 34.287 | 1.00 | 0.00 | C   |
| ATOM | 3243 | O ASP B 718   | 24.996 | 67.318 | 34.863 | 1.00 | 0.00 | O   |
| ATOM | 3244 | CB ASP B 718  | 25.202 | 69.681 | 32.244 | 1.00 | 0.00 | C   |
| ATOM | 3245 | CG ASP B 718  | 26.224 | 70.600 | 31.612 | 1.00 | 0.00 | C   |
| ATOM | 3246 | OD1 ASP B 718 | 27.315 | 70.761 | 32.219 | 1.00 | 0.00 | O   |
| ATOM | 3247 | OD2 ASP B 718 | 25.927 | 71.170 | 30.527 | 1.00 | 0.00 | O   |
| ATOM | 3248 | N LYS B 719   | 23.983 | 69.320 | 34.537 | 1.00 | 0.00 | N   |
| ATOM | 3249 | CA LYS B 719  | 22.962 | 69.092 | 35.512 | 1.00 | 0.00 | C   |



|        |      |     |           |        |        |        |      |      |     |
|--------|------|-----|-----------|--------|--------|--------|------|------|-----|
| ATOM   | 3250 | C   | LYS B 719 | 23.635 | 69.004 | 36.833 | 1.00 | 0.00 | C   |
| ATOM   | 3251 | O   | LYS B 719 | 23.107 | 68.418 | 37.778 | 1.00 | 0.00 | O   |
| ATOM   | 3252 | CB  | LYS B 719 | 22.207 | 67.773 | 35.281 | 1.00 | 0.00 | C   |
| ATOM   | 3253 | CG  | LYS B 719 | 21.308 | 67.777 | 34.044 | 1.00 | 0.00 | C   |
| ATOM   | 3254 | CD  | LYS B 719 | 20.114 | 68.727 | 34.159 | 1.00 | 0.00 | C   |
| ATOM   | 3255 | CE  | LYS B 719 | 19.010 | 68.191 | 35.075 | 1.00 | 0.00 | C   |
| ATOM   | 3256 | NZ  | LYS B 719 | 17.886 | 69.154 | 35.140 | 1.00 | 0.00 | NI+ |
| HETATM | 3257 | N   | HIE B 720 | 24.831 | 69.610 | 36.926 | 1.00 | 0.00 | N   |
| HETATM | 3258 | CA  | HIE B 720 | 25.594 | 69.600 | 38.139 | 1.00 | 0.00 | C   |
| HETATM | 3259 | C   | HIE B 720 | 25.898 | 68.179 | 38.476 | 1.00 | 0.00 | C   |
| HETATM | 3260 | O   | HIE B 720 | 26.252 | 67.861 | 39.609 | 1.00 | 0.00 | O   |
| HETATM | 3261 | CB  | HIE B 720 | 24.847 | 70.234 | 39.326 | 1.00 | 0.00 | C   |
| HETATM | 3262 | CG  | HIE B 720 | 24.626 | 71.707 | 39.159 | 1.00 | 0.00 | C   |
| HETATM | 3263 | CD2 | HIE B 720 | 23.577 | 72.387 | 38.617 | 1.00 | 0.00 | C   |
| HETATM | 3264 | ND1 | HIE B 720 | 25.528 | 72.670 | 39.558 | 1.00 | 0.00 | N   |
| HETATM | 3265 | CE1 | HIE B 720 | 24.987 | 73.871 | 39.242 | 1.00 | 0.00 | C   |
| HETATM | 3266 | NE2 | HIE B 720 | 23.803 | 73.750 | 38.668 | 1.00 | 0.00 | N   |
| ATOM   | 3267 | N   | LYS B 721 | 25.771 | 67.287 | 37.477 | 1.00 | 0.00 | N   |
| ATOM   | 3268 | CA  | LYS B 721 | 26.132 | 65.913 | 37.652 | 1.00 | 0.00 | C   |
| ATOM   | 3269 | C   | LYS B 721 | 27.609 | 65.911 | 37.795 | 1.00 | 0.00 | C   |
| ATOM   | 3270 | O   | LYS B 721 | 28.185 | 65.143 | 38.557 | 1.00 | 0.00 | O   |
| ATOM   | 3271 | CB  | LYS B 721 | 25.825 | 65.031 | 36.430 | 1.00 | 0.00 | C   |
| ATOM   | 3272 | CG  | LYS B 721 | 24.405 | 64.475 | 36.380 | 1.00 | 0.00 | C   |
| ATOM   | 3273 | CD  | LYS B 721 | 24.110 | 63.466 | 37.491 | 1.00 | 0.00 | C   |
| ATOM   | 3274 | CE  | LYS B 721 | 24.218 | 64.046 | 38.901 | 1.00 | 0.00 | C   |
| ATOM   | 3275 | NZ  | LYS B 721 | 23.925 | 62.999 | 39.905 | 1.00 | 0.00 | NI+ |
| ATOM   | 3276 | N   | LYS B 722 | 28.245 | 66.840 | 37.063 | 1.00 | 0.00 | N   |
| ATOM   | 3277 | CA  | LYS B 722 | 29.667 | 66.875 | 36.940 | 1.00 | 0.00 | C   |
| ATOM   | 3278 | C   | LYS B 722 | 30.326 | 66.990 | 38.272 | 1.00 | 0.00 | C   |
| ATOM   | 3279 | O   | LYS B 722 | 31.337 | 66.335 | 38.511 | 1.00 | 0.00 | O   |
| ATOM   | 3280 | CB  | LYS B 722 | 30.172 | 68.054 | 36.091 | 1.00 | 0.00 | C   |
| ATOM   | 3281 | CG  | LYS B 722 | 29.828 | 69.429 | 36.669 | 1.00 | 0.00 | C   |
| ATOM   | 3282 | CD  | LYS B 722 | 28.325 | 69.688 | 36.788 | 1.00 | 0.00 | C   |
| ATOM   | 3283 | CE  | LYS B 722 | 27.989 | 71.097 | 37.282 | 1.00 | 0.00 | C   |
| ATOM   | 3284 | NZ  | LYS B 722 | 28.096 | 72.065 | 36.166 | 1.00 | 0.00 | NI+ |
| ATOM   | 3285 | N   | LEU B 723 | 29.784 | 67.808 | 39.189 | 1.00 | 0.00 | N   |
| ATOM   | 3286 | CA  | LEU B 723 | 30.472 | 68.024 | 40.426 | 1.00 | 0.00 | C   |
| ATOM   | 3287 | C   | LEU B 723 | 30.635 | 66.721 | 41.156 | 1.00 | 0.00 | C   |
| ATOM   | 3288 | O   | LEU B 723 | 31.743 | 66.369 | 41.558 | 1.00 | 0.00 | O   |
| ATOM   | 3289 | CB  | LEU B 723 | 29.700 | 69.031 | 41.315 | 1.00 | 0.00 | C   |
| ATOM   | 3290 | CG  | LEU B 723 | 30.331 | 69.441 | 42.667 | 1.00 | 0.00 | C   |
| ATOM   | 3291 | CD1 | LEU B 723 | 29.510 | 70.569 | 43.312 | 1.00 | 0.00 | C   |
| ATOM   | 3292 | CD2 | LEU B 723 | 30.488 | 68.265 | 43.643 | 1.00 | 0.00 | C   |
| ATOM   | 3293 | N   | LEU B 724 | 29.541 | 65.948 | 41.317 | 1.00 | 0.00 | N   |

|      |      |     |           |        |        |        |      |      |   |
|------|------|-----|-----------|--------|--------|--------|------|------|---|
| ATOM | 3294 | CA  | LEU B 724 | 29.610 | 64.732 | 42.082 | 1.00 | 0.00 | C |
| ATOM | 3295 | C   | LEU B 724 | 30.509 | 63.760 | 41.398 | 1.00 | 0.00 | C |
| ATOM | 3296 | O   | LEU B 724 | 31.381 | 63.153 | 42.021 | 1.00 | 0.00 | O |
| ATOM | 3297 | CB  | LEU B 724 | 28.250 | 64.019 | 42.206 | 1.00 | 0.00 | C |
| ATOM | 3298 | CG  | LEU B 724 | 27.176 | 64.829 | 42.952 | 1.00 | 0.00 | C |
| ATOM | 3299 | CD1 | LEU B 724 | 27.576 | 65.062 | 44.418 | 1.00 | 0.00 | C |
| ATOM | 3300 | CD2 | LEU B 724 | 26.826 | 66.121 | 42.201 | 1.00 | 0.00 | C |
| ATOM | 3301 | N   | TRP B 725 | 30.333 | 63.611 | 40.075 | 1.00 | 0.00 | N |
| ATOM | 3302 | CA  | TRP B 725 | 31.090 | 62.652 | 39.336 | 1.00 | 0.00 | C |
| ATOM | 3303 | C   | TRP B 725 | 32.530 | 63.038 | 39.421 | 1.00 | 0.00 | C |
| ATOM | 3304 | O   | TRP B 725 | 33.405 | 62.188 | 39.565 | 1.00 | 0.00 | O |
| ATOM | 3305 | CB  | TRP B 725 | 30.681 | 62.577 | 37.854 | 1.00 | 0.00 | C |
| ATOM | 3306 | CG  | TRP B 725 | 29.305 | 61.991 | 37.621 | 1.00 | 0.00 | C |
| ATOM | 3307 | CD1 | TRP B 725 | 28.096 | 62.616 | 37.513 | 1.00 | 0.00 | C |
| ATOM | 3308 | CD2 | TRP B 725 | 29.046 | 60.584 | 37.475 | 1.00 | 0.00 | C |
| ATOM | 3309 | CE2 | TRP B 725 | 27.670 | 60.438 | 37.286 | 1.00 | 0.00 | C |
| ATOM | 3310 | CE3 | TRP B 725 | 29.883 | 59.507 | 37.497 | 1.00 | 0.00 | C |
| ATOM | 3311 | NE1 | TRP B 725 | 27.101 | 61.693 | 37.315 | 1.00 | 0.00 | N |
| ATOM | 3312 | CZ2 | TRP B 725 | 27.109 | 59.203 | 37.117 | 1.00 | 0.00 | C |
| ATOM | 3313 | CZ3 | TRP B 725 | 29.313 | 58.265 | 37.322 | 1.00 | 0.00 | C |
| ATOM | 3314 | CH2 | TRP B 725 | 27.953 | 58.117 | 37.138 | 1.00 | 0.00 | C |
| ATOM | 3315 | N   | TYR B 726 | 32.814 | 64.348 | 39.357 | 1.00 | 0.00 | N |
| ATOM | 3316 | CA  | TYR B 726 | 34.174 | 64.780 | 39.395 | 1.00 | 0.00 | C |
| ATOM | 3317 | C   | TYR B 726 | 34.809 | 64.357 | 40.675 | 1.00 | 0.00 | C |
| ATOM | 3318 | O   | TYR B 726 | 35.935 | 63.860 | 40.669 | 1.00 | 0.00 | O |
| ATOM | 3319 | CB  | TYR B 726 | 34.373 | 66.301 | 39.321 | 1.00 | 0.00 | C |
| ATOM | 3320 | CG  | TYR B 726 | 35.744 | 66.482 | 39.876 | 1.00 | 0.00 | C |
| ATOM | 3321 | CD1 | TYR B 726 | 36.852 | 66.080 | 39.163 | 1.00 | 0.00 | C |
| ATOM | 3322 | CD2 | TYR B 726 | 35.913 | 67.051 | 41.118 | 1.00 | 0.00 | C |
| ATOM | 3323 | CE1 | TYR B 726 | 38.110 | 66.237 | 39.690 | 1.00 | 0.00 | C |
| ATOM | 3324 | CE2 | TYR B 726 | 37.167 | 67.210 | 41.649 | 1.00 | 0.00 | C |
| ATOM | 3325 | CZ  | TYR B 726 | 38.265 | 66.800 | 40.932 | 1.00 | 0.00 | C |
| ATOM | 3326 | OH  | TYR B 726 | 39.554 | 66.966 | 41.474 | 1.00 | 0.00 | O |
| ATOM | 3327 | N   | TYR B 727 | 34.115 | 64.538 | 41.808 | 1.00 | 0.00 | N |
| ATOM | 3328 | CA  | TYR B 727 | 34.731 | 64.202 | 43.057 | 1.00 | 0.00 | C |
| ATOM | 3329 | C   | TYR B 727 | 35.060 | 62.750 | 43.098 | 1.00 | 0.00 | C |
| ATOM | 3330 | O   | TYR B 727 | 36.152 | 62.378 | 43.530 | 1.00 | 0.00 | O |
| ATOM | 3331 | CB  | TYR B 727 | 33.873 | 64.542 | 44.290 | 1.00 | 0.00 | C |
| ATOM | 3332 | CG  | TYR B 727 | 34.047 | 65.996 | 44.558 | 1.00 | 0.00 | C |
| ATOM | 3333 | CD1 | TYR B 727 | 35.130 | 66.414 | 45.292 | 1.00 | 0.00 | C |
| ATOM | 3334 | CD2 | TYR B 727 | 33.158 | 66.935 | 44.088 | 1.00 | 0.00 | C |
| ATOM | 3335 | CE1 | TYR B 727 | 35.328 | 67.748 | 45.562 | 1.00 | 0.00 | C |
| ATOM | 3336 | CE2 | TYR B 727 | 33.350 | 68.271 | 44.354 | 1.00 | 0.00 | C |
| ATOM | 3337 | CZ  | TYR B 727 | 34.436 | 68.677 | 45.092 | 1.00 | 0.00 | C |

|      |      |     |     |       |        |        |        |      |      |   |
|------|------|-----|-----|-------|--------|--------|--------|------|------|---|
| ATOM | 3338 | OH  | TYR | B 727 | 34.638 | 70.046 | 45.370 | 1.00 | 0.00 | O |
| ATOM | 3339 | N   | VAL | B 728 | 34.146 | 61.876 | 42.648 | 1.00 | 0.00 | N |
| ATOM | 3340 | CA  | VAL | B 728 | 34.455 | 60.479 | 42.736 | 1.00 | 0.00 | C |
| ATOM | 3341 | C   | VAL | B 728 | 35.657 | 60.202 | 41.885 | 1.00 | 0.00 | C |
| ATOM | 3342 | O   | VAL | B 728 | 36.556 | 59.466 | 42.291 | 1.00 | 0.00 | O |
| ATOM | 3343 | CB  | VAL | B 728 | 33.334 | 59.577 | 42.293 | 1.00 | 0.00 | C |
| ATOM | 3344 | CG1 | VAL | B 728 | 33.091 | 59.754 | 40.786 | 1.00 | 0.00 | C |
| ATOM | 3345 | CG2 | VAL | B 728 | 33.693 | 58.134 | 42.692 | 1.00 | 0.00 | C |
| ATOM | 3346 | N   | ALA | B 729 | 35.714 | 60.807 | 40.683 | 1.00 | 0.00 | N |
| ATOM | 3347 | CA  | ALA | B 729 | 36.796 | 60.596 | 39.764 | 1.00 | 0.00 | C |
| ATOM | 3348 | C   | ALA | B 729 | 38.062 | 61.073 | 40.396 | 1.00 | 0.00 | C |
| ATOM | 3349 | O   | ALA | B 729 | 39.125 | 60.487 | 40.204 | 1.00 | 0.00 | O |
| ATOM | 3350 | CB  | ALA | B 729 | 36.622 | 61.360 | 38.439 | 1.00 | 0.00 | C |
| ATOM | 3351 | N   | PHE | B 730 | 37.989 | 62.181 | 41.155 | 1.00 | 0.00 | N |
| ATOM | 3352 | CA  | PHE | B 730 | 39.163 | 62.688 | 41.802 | 1.00 | 0.00 | C |
| ATOM | 3353 | C   | PHE | B 730 | 39.631 | 61.656 | 42.779 | 1.00 | 0.00 | C |
| ATOM | 3354 | O   | PHE | B 730 | 40.828 | 61.401 | 42.899 | 1.00 | 0.00 | O |
| ATOM | 3355 | CB  | PHE | B 730 | 38.901 | 63.989 | 42.582 | 1.00 | 0.00 | C |
| ATOM | 3356 | CG  | PHE | B 730 | 40.182 | 64.385 | 43.235 | 1.00 | 0.00 | C |
| ATOM | 3357 | CD1 | PHE | B 730 | 41.192 | 64.970 | 42.506 | 1.00 | 0.00 | C |
| ATOM | 3358 | CD2 | PHE | B 730 | 40.373 | 64.178 | 44.583 | 1.00 | 0.00 | C |
| ATOM | 3359 | CE1 | PHE | B 730 | 42.371 | 65.340 | 43.106 | 1.00 | 0.00 | C |
| ATOM | 3360 | CE2 | PHE | B 730 | 41.549 | 64.545 | 45.188 | 1.00 | 0.00 | C |
| ATOM | 3361 | CZ  | PHE | B 730 | 42.553 | 65.128 | 44.452 | 1.00 | 0.00 | C |
| ATOM | 3362 | N   | PHE | B 731 | 38.679 | 61.027 | 43.489 | 1.00 | 0.00 | N |
| ATOM | 3363 | CA  | PHE | B 731 | 38.962 | 60.040 | 44.490 | 1.00 | 0.00 | C |
| ATOM | 3364 | C   | PHE | B 731 | 39.595 | 58.833 | 43.877 | 1.00 | 0.00 | C |
| ATOM | 3365 | O   | PHE | B 731 | 40.364 | 58.143 | 44.540 | 1.00 | 0.00 | O |
| ATOM | 3366 | CB  | PHE | B 731 | 37.730 | 59.581 | 45.290 | 1.00 | 0.00 | C |
| ATOM | 3367 | CG  | PHE | B 731 | 37.447 | 60.617 | 46.327 | 1.00 | 0.00 | C |
| ATOM | 3368 | CD1 | PHE | B 731 | 38.156 | 60.612 | 47.504 | 1.00 | 0.00 | C |
| ATOM | 3369 | CD2 | PHE | B 731 | 36.484 | 61.578 | 46.135 | 1.00 | 0.00 | C |
| ATOM | 3370 | CE1 | PHE | B 731 | 37.916 | 61.553 | 48.479 | 1.00 | 0.00 | C |
| ATOM | 3371 | CE2 | PHE | B 731 | 36.238 | 62.522 | 47.105 | 1.00 | 0.00 | C |
| ATOM | 3372 | CZ  | PHE | B 731 | 36.954 | 62.513 | 48.278 | 1.00 | 0.00 | C |
| ATOM | 3373 | N   | THR | B 732 | 39.264 | 58.518 | 42.612 | 1.00 | 0.00 | N |
| ATOM | 3374 | CA  | THR | B 732 | 39.768 | 57.326 | 41.990 | 1.00 | 0.00 | C |
| ATOM | 3375 | C   | THR | B 732 | 41.265 | 57.357 | 41.842 | 1.00 | 0.00 | C |
| ATOM | 3376 | O   | THR | B 732 | 41.904 | 56.310 | 41.930 | 1.00 | 0.00 | O |
| ATOM | 3377 | CB  | THR | B 732 | 39.201 | 57.052 | 40.625 | 1.00 | 0.00 | C |
| ATOM | 3378 | CG2 | THR | B 732 | 37.663 | 57.066 | 40.723 | 1.00 | 0.00 | C |
| ATOM | 3379 | OG1 | THR | B 732 | 39.642 | 58.021 | 39.689 | 1.00 | 0.00 | O |
| ATOM | 3380 | N   | SER | B 733 | 41.881 | 58.534 | 41.602 | 1.00 | 0.00 | N |
| ATOM | 3381 | CA  | SER | B 733 | 43.296 | 58.566 | 41.322 | 1.00 | 0.00 | C |

|      |      |     |           |        |        |        |      |      |   |
|------|------|-----|-----------|--------|--------|--------|------|------|---|
| ATOM | 3382 | C   | SER B 733 | 44.092 | 57.989 | 42.453 | 1.00 | 0.00 | C |
| ATOM | 3383 | O   | SER B 733 | 43.883 | 58.289 | 43.627 | 1.00 | 0.00 | O |
| ATOM | 3384 | CB  | SER B 733 | 43.843 | 59.978 | 41.033 | 1.00 | 0.00 | C |
| ATOM | 3385 | OG  | SER B 733 | 43.767 | 60.785 | 42.198 | 1.00 | 0.00 | O |
| ATOM | 3386 | N   | PRO B 734 | 45.013 | 57.132 | 42.084 | 1.00 | 0.00 | N |
| ATOM | 3387 | CA  | PRO B 734 | 45.895 | 56.493 | 43.026 | 1.00 | 0.00 | C |
| ATOM | 3388 | C   | PRO B 734 | 46.867 | 57.439 | 43.641 | 1.00 | 0.00 | C |
| ATOM | 3389 | O   | PRO B 734 | 47.352 | 57.160 | 44.736 | 1.00 | 0.00 | O |
| ATOM | 3390 | CB  | PRO B 734 | 46.575 | 55.357 | 42.265 | 1.00 | 0.00 | C |
| ATOM | 3391 | CG  | PRO B 734 | 45.571 | 55.007 | 41.155 | 1.00 | 0.00 | C |
| ATOM | 3392 | CD  | PRO B 734 | 44.823 | 56.324 | 40.888 | 1.00 | 0.00 | C |
| ATOM | 3393 | N   | PHE B 735 | 47.199 | 58.544 | 42.946 | 1.00 | 0.00 | N |
| ATOM | 3394 | CA  | PHE B 735 | 48.137 | 59.480 | 43.487 | 1.00 | 0.00 | C |
| ATOM | 3395 | C   | PHE B 735 | 47.530 | 60.062 | 44.717 | 1.00 | 0.00 | C |
| ATOM | 3396 | O   | PHE B 735 | 48.177 | 60.150 | 45.762 | 1.00 | 0.00 | O |
| ATOM | 3397 | CB  | PHE B 735 | 48.444 | 60.644 | 42.526 | 1.00 | 0.00 | C |
| ATOM | 3398 | CG  | PHE B 735 | 49.421 | 61.548 | 43.200 | 1.00 | 0.00 | C |
| ATOM | 3399 | CD1 | PHE B 735 | 50.763 | 61.252 | 43.216 | 1.00 | 0.00 | C |
| ATOM | 3400 | CD2 | PHE B 735 | 48.988 | 62.699 | 43.815 | 1.00 | 0.00 | C |
| ATOM | 3401 | CE1 | PHE B 735 | 51.658 | 62.094 | 43.839 | 1.00 | 0.00 | C |
| ATOM | 3402 | CE2 | PHE B 735 | 49.872 | 63.544 | 44.441 | 1.00 | 0.00 | C |
| ATOM | 3403 | CZ  | PHE B 735 | 51.213 | 63.238 | 44.454 | 1.00 | 0.00 | C |
| ATOM | 3404 | N   | VAL B 736 | 46.251 | 60.466 | 44.628 | 1.00 | 0.00 | N |
| ATOM | 3405 | CA  | VAL B 736 | 45.617 | 61.057 | 45.765 | 1.00 | 0.00 | C |
| ATOM | 3406 | C   | VAL B 736 | 45.485 | 60.008 | 46.819 | 1.00 | 0.00 | C |
| ATOM | 3407 | O   | VAL B 736 | 45.651 | 60.281 | 48.003 | 1.00 | 0.00 | O |
| ATOM | 3408 | CB  | VAL B 736 | 44.253 | 61.625 | 45.487 | 1.00 | 0.00 | C |
| ATOM | 3409 | CG1 | VAL B 736 | 44.400 | 62.716 | 44.414 | 1.00 | 0.00 | C |
| ATOM | 3410 | CG2 | VAL B 736 | 43.275 | 60.498 | 45.130 | 1.00 | 0.00 | C |
| ATOM | 3411 | N   | VAL B 737 | 45.189 | 58.763 | 46.400 | 1.00 | 0.00 | N |
| ATOM | 3412 | CA  | VAL B 737 | 45.003 | 57.693 | 47.333 | 1.00 | 0.00 | C |
| ATOM | 3413 | C   | VAL B 737 | 46.278 | 57.484 | 48.086 | 1.00 | 0.00 | C |
| ATOM | 3414 | O   | VAL B 737 | 46.259 | 57.305 | 49.301 | 1.00 | 0.00 | O |
| ATOM | 3415 | CB  | VAL B 737 | 44.657 | 56.392 | 46.667 | 1.00 | 0.00 | C |
| ATOM | 3416 | CG1 | VAL B 737 | 44.577 | 55.295 | 47.740 | 1.00 | 0.00 | C |
| ATOM | 3417 | CG2 | VAL B 737 | 43.357 | 56.582 | 45.867 | 1.00 | 0.00 | C |
| ATOM | 3418 | N   | PHE B 738 | 47.421 | 57.509 | 47.379 | 1.00 | 0.00 | N |
| ATOM | 3419 | CA  | PHE B 738 | 48.683 | 57.272 | 48.015 | 1.00 | 0.00 | C |
| ATOM | 3420 | C   | PHE B 738 | 48.947 | 58.338 | 49.027 | 1.00 | 0.00 | C |
| ATOM | 3421 | O   | PHE B 738 | 49.309 | 58.044 | 50.165 | 1.00 | 0.00 | O |
| ATOM | 3422 | CB  | PHE B 738 | 49.861 | 57.283 | 47.025 | 1.00 | 0.00 | C |
| ATOM | 3423 | CG  | PHE B 738 | 51.100 | 57.054 | 47.819 | 1.00 | 0.00 | C |
| ATOM | 3424 | CD1 | PHE B 738 | 51.463 | 55.785 | 48.203 | 1.00 | 0.00 | C |
| ATOM | 3425 | CD2 | PHE B 738 | 51.901 | 58.112 | 48.175 | 1.00 | 0.00 | C |

|      |      |               |        |        |        |      |      |   |
|------|------|---------------|--------|--------|--------|------|------|---|
| ATOM | 3426 | CE1 PHE B 738 | 52.610 | 55.577 | 48.935 | 1.00 | 0.00 | C |
| ATOM | 3427 | CE2 PHE B 738 | 53.049 | 57.911 | 48.905 | 1.00 | 0.00 | C |
| ATOM | 3428 | CZ PHE B 738  | 53.404 | 56.641 | 49.289 | 1.00 | 0.00 | C |
| ATOM | 3429 | N SER B 739   | 48.754 | 59.609 | 48.641 | 1.00 | 0.00 | N |
| ATOM | 3430 | CA SER B 739  | 49.034 | 60.700 | 49.531 | 1.00 | 0.00 | C |
| ATOM | 3431 | C SER B 739   | 48.109 | 60.600 | 50.700 | 1.00 | 0.00 | C |
| ATOM | 3432 | O SER B 739   | 48.496 | 60.862 | 51.838 | 1.00 | 0.00 | O |
| ATOM | 3433 | CB SER B 739  | 48.800 | 62.076 | 48.879 | 1.00 | 0.00 | C |
| ATOM | 3434 | OG SER B 739  | 47.430 | 62.237 | 48.541 | 1.00 | 0.00 | O |
| ATOM | 3435 | N TRP B 740   | 46.851 | 60.211 | 50.441 | 1.00 | 0.00 | N |
| ATOM | 3436 | CA TRP B 740  | 45.885 | 60.115 | 51.488 | 1.00 | 0.00 | C |
| ATOM | 3437 | C TRP B 740   | 46.307 | 59.047 | 52.442 | 1.00 | 0.00 | C |
| ATOM | 3438 | O TRP B 740   | 46.240 | 59.223 | 53.657 | 1.00 | 0.00 | O |
| ATOM | 3439 | CB TRP B 740  | 44.481 | 59.774 | 50.961 | 1.00 | 0.00 | C |
| ATOM | 3440 | CG TRP B 740  | 43.427 | 59.703 | 52.035 | 1.00 | 0.00 | C |
| ATOM | 3441 | CD1 TRP B 740 | 42.877 | 58.617 | 52.650 | 1.00 | 0.00 | C |
| ATOM | 3442 | CD2 TRP B 740 | 42.823 | 60.860 | 52.634 | 1.00 | 0.00 | C |
| ATOM | 3443 | CE2 TRP B 740 | 41.917 | 60.405 | 53.590 | 1.00 | 0.00 | C |
| ATOM | 3444 | CE3 TRP B 740 | 43.011 | 62.191 | 52.401 | 1.00 | 0.00 | C |
| ATOM | 3445 | NE1 TRP B 740 | 41.959 | 59.025 | 53.589 | 1.00 | 0.00 | N |
| ATOM | 3446 | CZ2 TRP B 740 | 41.183 | 61.280 | 54.338 | 1.00 | 0.00 | C |
| ATOM | 3447 | CZ3 TRP B 740 | 42.268 | 63.073 | 53.153 | 1.00 | 0.00 | C |
| ATOM | 3448 | CH2 TRP B 740 | 41.371 | 62.626 | 54.101 | 1.00 | 0.00 | C |
| ATOM | 3449 | N ASN B 741   | 46.772 | 57.904 | 51.907 | 1.00 | 0.00 | N |
| ATOM | 3450 | CA ASN B 741  | 47.132 | 56.799 | 52.745 | 1.00 | 0.00 | C |
| ATOM | 3451 | C ASN B 741   | 48.248 | 57.208 | 53.649 | 1.00 | 0.00 | C |
| ATOM | 3452 | O ASN B 741   | 48.207 | 56.929 | 54.847 | 1.00 | 0.00 | O |
| ATOM | 3453 | CB ASN B 741  | 47.610 | 55.576 | 51.944 | 1.00 | 0.00 | C |
| ATOM | 3454 | CG ASN B 741  | 46.410 | 55.001 | 51.201 | 1.00 | 0.00 | C |
| ATOM | 3455 | ND2 ASN B 741 | 46.641 | 54.547 | 49.940 | 1.00 | 0.00 | N |
| ATOM | 3456 | OD1 ASN B 741 | 45.296 | 54.962 | 51.725 | 1.00 | 0.00 | O |
| ATOM | 3457 | N VAL B 742   | 49.276 | 57.894 | 53.116 | 1.00 | 0.00 | N |
| ATOM | 3458 | CA VAL B 742  | 50.381 | 58.247 | 53.957 | 1.00 | 0.00 | C |
| ATOM | 3459 | C VAL B 742   | 49.905 | 59.182 | 55.027 | 1.00 | 0.00 | C |
| ATOM | 3460 | O VAL B 742   | 50.264 | 59.024 | 56.193 | 1.00 | 0.00 | O |
| ATOM | 3461 | CB VAL B 742  | 51.524 | 58.895 | 53.225 | 1.00 | 0.00 | C |
| ATOM | 3462 | CG1 VAL B 742 | 52.092 | 57.879 | 52.219 | 1.00 | 0.00 | C |
| ATOM | 3463 | CG2 VAL B 742 | 51.049 | 60.208 | 52.585 | 1.00 | 0.00 | C |
| ATOM | 3464 | N VAL B 743   | 49.069 | 60.170 | 54.669 | 1.00 | 0.00 | N |
| ATOM | 3465 | CA VAL B 743  | 48.625 | 61.124 | 55.643 | 1.00 | 0.00 | C |
| ATOM | 3466 | C VAL B 743   | 47.842 | 60.413 | 56.703 | 1.00 | 0.00 | C |
| ATOM | 3467 | O VAL B 743   | 48.035 | 60.648 | 57.895 | 1.00 | 0.00 | O |
| ATOM | 3468 | CB VAL B 743  | 47.730 | 62.177 | 55.063 | 1.00 | 0.00 | C |
| ATOM | 3469 | CG1 VAL B 743 | 47.247 | 63.085 | 56.207 | 1.00 | 0.00 | C |

|      |      |               |        |        |        |      |      |   |
|------|------|---------------|--------|--------|--------|------|------|---|
| ATOM | 3470 | CG2 VAL B 743 | 48.498 | 62.925 | 53.958 | 1.00 | 0.00 | C |
| ATOM | 3471 | N PHE B 744   | 46.939 | 59.509 | 56.292 | 1.00 | 0.00 | N |
| ATOM | 3472 | CA PHE B 744  | 46.079 | 58.815 | 57.210 | 1.00 | 0.00 | C |
| ATOM | 3473 | C PHE B 744   | 46.906 | 57.960 | 58.109 | 1.00 | 0.00 | C |
| ATOM | 3474 | O PHE B 744   | 46.688 | 57.921 | 59.318 | 1.00 | 0.00 | O |
| ATOM | 3475 | CB PHE B 744  | 45.090 | 57.887 | 56.482 | 1.00 | 0.00 | C |
| ATOM | 3476 | CG PHE B 744  | 44.173 | 57.281 | 57.488 | 1.00 | 0.00 | C |
| ATOM | 3477 | CD1 PHE B 744 | 43.019 | 57.933 | 57.853 | 1.00 | 0.00 | C |
| ATOM | 3478 | CD2 PHE B 744 | 44.461 | 56.067 | 58.065 | 1.00 | 0.00 | C |
| ATOM | 3479 | CE1 PHE B 744 | 42.162 | 57.382 | 58.777 | 1.00 | 0.00 | C |
| ATOM | 3480 | CE2 PHE B 744 | 43.608 | 55.510 | 58.991 | 1.00 | 0.00 | C |
| ATOM | 3481 | CZ PHE B 744  | 42.454 | 56.166 | 59.347 | 1.00 | 0.00 | C |
| ATOM | 3482 | N TYR B 745   | 47.896 | 57.252 | 57.537 | 1.00 | 0.00 | N |
| ATOM | 3483 | CA TYR B 745  | 48.647 | 56.322 | 58.316 | 1.00 | 0.00 | C |
| ATOM | 3484 | C TYR B 745   | 49.401 | 57.068 | 59.364 | 1.00 | 0.00 | C |
| ATOM | 3485 | O TYR B 745   | 49.499 | 56.615 | 60.503 | 1.00 | 0.00 | O |
| ATOM | 3486 | CB TYR B 745  | 49.654 | 55.495 | 57.506 | 1.00 | 0.00 | C |
| ATOM | 3487 | CG TYR B 745  | 49.971 | 54.334 | 58.378 | 1.00 | 0.00 | C |
| ATOM | 3488 | CD1 TYR B 745 | 50.868 | 54.432 | 59.413 | 1.00 | 0.00 | C |
| ATOM | 3489 | CD2 TYR B 745 | 49.339 | 53.130 | 58.160 | 1.00 | 0.00 | C |
| ATOM | 3490 | CE1 TYR B 745 | 51.135 | 53.340 | 60.210 | 1.00 | 0.00 | C |
| ATOM | 3491 | CE2 TYR B 745 | 49.599 | 52.039 | 58.951 | 1.00 | 0.00 | C |
| ATOM | 3492 | CZ TYR B 745  | 50.504 | 52.145 | 59.980 | 1.00 | 0.00 | C |
| ATOM | 3493 | OH TYR B 745  | 50.775 | 51.026 | 60.795 | 1.00 | 0.00 | O |
| ATOM | 3494 | N ILE B 746   | 49.969 | 58.236 | 59.007 | 1.00 | 0.00 | N |
| ATOM | 3495 | CA ILE B 746  | 50.736 | 58.971 | 59.967 | 1.00 | 0.00 | C |
| ATOM | 3496 | C ILE B 746   | 49.818 | 59.382 | 61.069 | 1.00 | 0.00 | C |
| ATOM | 3497 | O ILE B 746   | 50.153 | 59.263 | 62.242 | 1.00 | 0.00 | O |
| ATOM | 3498 | CB ILE B 746  | 51.419 | 60.187 | 59.396 | 1.00 | 0.00 | C |
| ATOM | 3499 | CG1 ILE B 746 | 50.460 | 61.322 | 58.990 | 1.00 | 0.00 | C |
| ATOM | 3500 | CG2 ILE B 746 | 52.242 | 59.679 | 58.210 | 1.00 | 0.00 | C |
| ATOM | 3501 | CD1 ILE B 746 | 50.010 | 62.216 | 60.145 | 1.00 | 0.00 | C |
| ATOM | 3502 | N ALA B 747   | 48.605 | 59.843 | 60.718 | 1.00 | 0.00 | N |
| ATOM | 3503 | CA ALA B 747  | 47.693 | 60.318 | 61.714 | 1.00 | 0.00 | C |
| ATOM | 3504 | C ALA B 747   | 47.399 | 59.179 | 62.632 | 1.00 | 0.00 | C |
| ATOM | 3505 | O ALA B 747   | 47.331 | 59.346 | 63.847 | 1.00 | 0.00 | O |
| ATOM | 3506 | CB ALA B 747  | 46.354 | 60.793 | 61.122 | 1.00 | 0.00 | C |
| ATOM | 3507 | N PHE B 748   | 47.237 | 57.980 | 62.054 | 1.00 | 0.00 | N |
| ATOM | 3508 | CA PHE B 748  | 46.918 | 56.812 | 62.816 | 1.00 | 0.00 | C |
| ATOM | 3509 | C PHE B 748   | 48.046 | 56.555 | 63.764 | 1.00 | 0.00 | C |
| ATOM | 3510 | O PHE B 748   | 47.827 | 56.235 | 64.930 | 1.00 | 0.00 | O |
| ATOM | 3511 | CB PHE B 748  | 46.745 | 55.571 | 61.920 | 1.00 | 0.00 | C |
| ATOM | 3512 | CG PHE B 748  | 46.418 | 54.403 | 62.782 | 1.00 | 0.00 | C |
| ATOM | 3513 | CD1 PHE B 748 | 45.126 | 54.182 | 63.202 | 1.00 | 0.00 | C |

|      |      |               |        |        |        |      |      |   |
|------|------|---------------|--------|--------|--------|------|------|---|
| ATOM | 3514 | CD2 PHE B 748 | 47.403 | 53.520 | 63.160 | 1.00 | 0.00 | C |
| ATOM | 3515 | CE1 PHE B 748 | 44.825 | 53.099 | 63.995 | 1.00 | 0.00 | C |
| ATOM | 3516 | CE2 PHE B 748 | 47.107 | 52.437 | 63.951 | 1.00 | 0.00 | C |
| ATOM | 3517 | CZ PHE B 748  | 45.816 | 52.224 | 64.370 | 1.00 | 0.00 | C |
| ATOM | 3518 | N LEU B 749   | 49.294 | 56.706 | 63.279 | 1.00 | 0.00 | N |
| ATOM | 3519 | CA LEU B 749  | 50.447 | 56.420 | 64.082 | 1.00 | 0.00 | C |
| ATOM | 3520 | C LEU B 749   | 50.495 | 57.350 | 65.256 | 1.00 | 0.00 | C |
| ATOM | 3521 | O LEU B 749   | 50.755 | 56.929 | 66.381 | 1.00 | 0.00 | O |
| ATOM | 3522 | CB LEU B 749  | 51.760 | 56.563 | 63.298 | 1.00 | 0.00 | C |
| ATOM | 3523 | CG LEU B 749  | 52.999 | 56.195 | 64.131 | 1.00 | 0.00 | C |
| ATOM | 3524 | CD1 LEU B 749 | 52.914 | 54.737 | 64.600 | 1.00 | 0.00 | C |
| ATOM | 3525 | CD2 LEU B 749 | 54.301 | 56.486 | 63.376 | 1.00 | 0.00 | C |
| ATOM | 3526 | N LEU B 750   | 50.232 | 58.648 | 65.025 | 1.00 | 0.00 | N |
| ATOM | 3527 | CA LEU B 750  | 50.292 | 59.628 | 66.070 | 1.00 | 0.00 | C |
| ATOM | 3528 | C LEU B 750   | 49.246 | 59.334 | 67.105 | 1.00 | 0.00 | C |
| ATOM | 3529 | O LEU B 750   | 49.518 | 59.411 | 68.301 | 1.00 | 0.00 | O |
| ATOM | 3530 | CB LEU B 750  | 50.074 | 61.050 | 65.528 | 1.00 | 0.00 | C |
| ATOM | 3531 | CG LEU B 750  | 51.315 | 61.626 | 64.815 | 1.00 | 0.00 | C |
| ATOM | 3532 | CD1 LEU B 750 | 51.920 | 60.650 | 63.799 | 1.00 | 0.00 | C |
| ATOM | 3533 | CD2 LEU B 750 | 50.971 | 62.964 | 64.149 | 1.00 | 0.00 | C |
| ATOM | 3534 | N LEU B 751   | 48.026 | 58.968 | 66.670 | 1.00 | 0.00 | N |
| ATOM | 3535 | CA LEU B 751  | 46.964 | 58.701 | 67.597 | 1.00 | 0.00 | C |
| ATOM | 3536 | C LEU B 751   | 47.355 | 57.517 | 68.425 | 1.00 | 0.00 | C |
| ATOM | 3537 | O LEU B 751   | 47.079 | 57.461 | 69.620 | 1.00 | 0.00 | O |
| ATOM | 3538 | CB LEU B 751  | 45.633 | 58.349 | 66.905 | 1.00 | 0.00 | C |
| ATOM | 3539 | CG LEU B 751  | 45.031 | 59.508 | 66.093 | 1.00 | 0.00 | C |
| ATOM | 3540 | CD1 LEU B 751 | 43.702 | 59.098 | 65.436 | 1.00 | 0.00 | C |
| ATOM | 3541 | CD2 LEU B 751 | 44.907 | 60.785 | 66.944 | 1.00 | 0.00 | C |
| ATOM | 3542 | N PHE B 752   | 48.020 | 56.544 | 67.786 | 1.00 | 0.00 | N |
| ATOM | 3543 | CA PHE B 752  | 48.432 | 55.319 | 68.404 | 1.00 | 0.00 | C |
| ATOM | 3544 | C PHE B 752   | 49.388 | 55.641 | 69.513 | 1.00 | 0.00 | C |
| ATOM | 3545 | O PHE B 752   | 49.279 | 55.100 | 70.611 | 1.00 | 0.00 | O |
| ATOM | 3546 | CB PHE B 752  | 49.154 | 54.430 | 67.373 | 1.00 | 0.00 | C |
| ATOM | 3547 | CG PHE B 752  | 49.444 | 53.081 | 67.934 | 1.00 | 0.00 | C |
| ATOM | 3548 | CD1 PHE B 752 | 48.475 | 52.104 | 67.934 | 1.00 | 0.00 | C |
| ATOM | 3549 | CD2 PHE B 752 | 50.690 | 52.785 | 68.438 | 1.00 | 0.00 | C |
| ATOM | 3550 | CE1 PHE B 752 | 48.736 | 50.857 | 68.442 | 1.00 | 0.00 | C |
| ATOM | 3551 | CE2 PHE B 752 | 50.959 | 51.535 | 68.947 | 1.00 | 0.00 | C |
| ATOM | 3552 | CZ PHE B 752  | 49.982 | 50.568 | 68.947 | 1.00 | 0.00 | C |
| ATOM | 3553 | N ALA B 753   | 50.357 | 56.537 | 69.245 | 1.00 | 0.00 | N |
| ATOM | 3554 | CA ALA B 753  | 51.341 | 56.914 | 70.217 | 1.00 | 0.00 | C |
| ATOM | 3555 | C ALA B 753   | 50.658 | 57.599 | 71.358 | 1.00 | 0.00 | C |
| ATOM | 3556 | O ALA B 753   | 50.993 | 57.377 | 72.519 | 1.00 | 0.00 | O |
| ATOM | 3557 | CB ALA B 753  | 52.397 | 57.883 | 69.652 | 1.00 | 0.00 | C |

|      |      |     |           |        |        |        |      |      |   |
|------|------|-----|-----------|--------|--------|--------|------|------|---|
| ATOM | 3558 | N   | TYR B 754 | 49.658 | 58.442 | 71.044 | 1.00 | 0.00 | N |
| ATOM | 3559 | CA  | TYR B 754 | 48.949 | 59.192 | 72.041 | 1.00 | 0.00 | C |
| ATOM | 3560 | C   | TYR B 754 | 48.310 | 58.213 | 72.961 | 1.00 | 0.00 | C |
| ATOM | 3561 | O   | TYR B 754 | 48.330 | 58.384 | 74.180 | 1.00 | 0.00 | O |
| ATOM | 3562 | CB  | TYR B 754 | 47.829 | 60.057 | 71.429 | 1.00 | 0.00 | C |
| ATOM | 3563 | CG  | TYR B 754 | 47.093 | 60.744 | 72.529 | 1.00 | 0.00 | C |
| ATOM | 3564 | CD1 | TYR B 754 | 47.626 | 61.850 | 73.148 | 1.00 | 0.00 | C |
| ATOM | 3565 | CD2 | TYR B 754 | 45.858 | 60.289 | 72.934 | 1.00 | 0.00 | C |
| ATOM | 3566 | CE1 | TYR B 754 | 46.945 | 62.487 | 74.159 | 1.00 | 0.00 | C |
| ATOM | 3567 | CE2 | TYR B 754 | 45.170 | 60.922 | 73.945 | 1.00 | 0.00 | C |
| ATOM | 3568 | CZ  | TYR B 754 | 45.716 | 62.022 | 74.558 | 1.00 | 0.00 | C |
| ATOM | 3569 | OH  | TYR B 754 | 45.014 | 62.673 | 75.597 | 1.00 | 0.00 | O |
| ATOM | 3570 | N   | VAL B 755 | 47.730 | 57.145 | 72.388 | 1.00 | 0.00 | N |
| ATOM | 3571 | CA  | VAL B 755 | 47.069 | 56.140 | 73.160 | 1.00 | 0.00 | C |
| ATOM | 3572 | C   | VAL B 755 | 48.075 | 55.500 | 74.058 | 1.00 | 0.00 | C |
| ATOM | 3573 | O   | VAL B 755 | 47.763 | 55.147 | 75.195 | 1.00 | 0.00 | O |
| ATOM | 3574 | CB  | VAL B 755 | 46.473 | 55.059 | 72.313 | 1.00 | 0.00 | C |
| ATOM | 3575 | CG1 | VAL B 755 | 45.860 | 54.005 | 73.248 | 1.00 | 0.00 | C |
| ATOM | 3576 | CG2 | VAL B 755 | 45.471 | 55.695 | 71.337 | 1.00 | 0.00 | C |
| ATOM | 3577 | N   | LEU B 756 | 49.322 | 55.333 | 73.575 | 1.00 | 0.00 | N |
| ATOM | 3578 | CA  | LEU B 756 | 50.330 | 54.671 | 74.352 | 1.00 | 0.00 | C |
| ATOM | 3579 | C   | LEU B 756 | 50.507 | 55.401 | 75.644 | 1.00 | 0.00 | C |
| ATOM | 3580 | O   | LEU B 756 | 50.504 | 54.792 | 76.711 | 1.00 | 0.00 | O |
| ATOM | 3581 | CB  | LEU B 756 | 51.714 | 54.710 | 73.675 | 1.00 | 0.00 | C |
| ATOM | 3582 | CG  | LEU B 756 | 51.857 | 53.812 | 72.433 | 1.00 | 0.00 | C |
| ATOM | 3583 | CD1 | LEU B 756 | 53.250 | 53.942 | 71.799 | 1.00 | 0.00 | C |
| ATOM | 3584 | CD2 | LEU B 756 | 51.540 | 52.358 | 72.792 | 1.00 | 0.00 | C |
| ATOM | 3585 | N   | LEU B 757 | 50.662 | 56.733 | 75.572 | 1.00 | 0.00 | N |
| ATOM | 3586 | CA  | LEU B 757 | 50.882 | 57.516 | 76.752 | 1.00 | 0.00 | C |
| ATOM | 3587 | C   | LEU B 757 | 49.626 | 57.480 | 77.578 | 1.00 | 0.00 | C |
| ATOM | 3588 | O   | LEU B 757 | 49.664 | 57.379 | 78.801 | 1.00 | 0.00 | O |
| ATOM | 3589 | CB  | LEU B 757 | 51.192 | 58.985 | 76.398 | 1.00 | 0.00 | C |
| ATOM | 3590 | CG  | LEU B 757 | 51.736 | 59.871 | 77.542 | 1.00 | 0.00 | C |
| ATOM | 3591 | CD1 | LEU B 757 | 51.999 | 61.298 | 77.041 | 1.00 | 0.00 | C |
| ATOM | 3592 | CD2 | LEU B 757 | 50.852 | 59.852 | 78.798 | 1.00 | 0.00 | C |
| ATOM | 3593 | N   | MET B 758 | 48.482 | 57.548 | 76.877 | 1.00 | 0.00 | N |
| ATOM | 3594 | CA  | MET B 758 | 47.133 | 57.655 | 77.353 | 1.00 | 0.00 | C |
| ATOM | 3595 | C   | MET B 758 | 46.663 | 56.420 | 78.075 | 1.00 | 0.00 | C |
| ATOM | 3596 | O   | MET B 758 | 45.762 | 56.507 | 78.911 | 1.00 | 0.00 | O |
| ATOM | 3597 | CB  | MET B 758 | 46.164 | 57.902 | 76.186 | 1.00 | 0.00 | C |
| ATOM | 3598 | CG  | MET B 758 | 44.727 | 58.196 | 76.607 | 1.00 | 0.00 | C |
| ATOM | 3599 | SD  | MET B 758 | 43.590 | 58.490 | 75.216 | 1.00 | 0.00 | S |
| ATOM | 3600 | CE  | MET B 758 | 42.129 | 58.760 | 76.259 | 1.00 | 0.00 | C |
| ATOM | 3601 | N   | ASP B 759 | 47.246 | 55.249 | 77.763 | 1.00 | 0.00 | N |



|        |      |     |           |        |        |        |      |      |   |
|--------|------|-----|-----------|--------|--------|--------|------|------|---|
| ATOM   | 3602 | CA  | ASP B 759 | 46.782 | 53.951 | 78.194 | 1.00 | 0.00 | C |
| ATOM   | 3603 | C   | ASP B 759 | 46.324 | 53.922 | 79.623 | 1.00 | 0.00 | C |
| ATOM   | 3604 | O   | ASP B 759 | 46.909 | 54.546 | 80.510 | 1.00 | 0.00 | O |
| ATOM   | 3605 | CB  | ASP B 759 | 47.856 | 52.857 | 78.025 | 1.00 | 0.00 | C |
| ATOM   | 3606 | CG  | ASP B 759 | 47.201 | 51.486 | 78.110 | 1.00 | 0.00 | C |
| ATOM   | 3607 | OD1 | ASP B 759 | 45.943 | 51.420 | 78.070 | 1.00 | 0.00 | O |
| ATOM   | 3608 | OD2 | ASP B 759 | 47.954 | 50.481 | 78.212 | 1.00 | 0.00 | O |
| ATOM   | 3609 | N   | PHE B 760 | 45.208 | 53.192 | 79.852 | 1.00 | 0.00 | N |
| ATOM   | 3610 | CA  | PHE B 760 | 44.599 | 53.024 | 81.141 | 1.00 | 0.00 | C |
| ATOM   | 3611 | C   | PHE B 760 | 44.431 | 51.546 | 81.340 | 1.00 | 0.00 | C |
| ATOM   | 3612 | O   | PHE B 760 | 44.396 | 50.785 | 80.375 | 1.00 | 0.00 | O |
| ATOM   | 3613 | CB  | PHE B 760 | 43.215 | 53.696 | 81.224 | 1.00 | 0.00 | C |
| ATOM   | 3614 | CG  | PHE B 760 | 42.736 | 53.657 | 82.634 | 1.00 | 0.00 | C |
| ATOM   | 3615 | CD1 | PHE B 760 | 43.214 | 54.552 | 83.561 | 1.00 | 0.00 | C |
| ATOM   | 3616 | CD2 | PHE B 760 | 41.796 | 52.734 | 83.030 | 1.00 | 0.00 | C |
| ATOM   | 3617 | CE1 | PHE B 760 | 42.771 | 54.518 | 84.863 | 1.00 | 0.00 | C |
| ATOM   | 3618 | CE2 | PHE B 760 | 41.348 | 52.693 | 84.327 | 1.00 | 0.00 | C |
| ATOM   | 3619 | CZ  | PHE B 760 | 41.836 | 53.587 | 85.250 | 1.00 | 0.00 | C |
| HETATM | 3620 | N   | HIE B 761 | 44.346 | 51.091 | 82.608 | 1.00 | 0.00 | N |
| HETATM | 3621 | CA  | HIE B 761 | 44.237 | 49.685 | 82.883 | 1.00 | 0.00 | C |
| HETATM | 3622 | C   | HIE B 761 | 42.843 | 49.231 | 82.605 | 1.00 | 0.00 | C |
| HETATM | 3623 | O   | HIE B 761 | 41.904 | 50.024 | 82.651 | 1.00 | 0.00 | O |
| HETATM | 3624 | CB  | HIE B 761 | 44.564 | 49.306 | 84.339 | 1.00 | 0.00 | C |
| HETATM | 3625 | CG  | HIE B 761 | 44.599 | 47.821 | 84.555 | 1.00 | 0.00 | C |
| HETATM | 3626 | CD2 | HIE B 761 | 45.647 | 46.955 | 84.516 | 1.00 | 0.00 | C |
| HETATM | 3627 | ND1 | HIE B 761 | 43.491 | 47.052 | 84.835 | 1.00 | 0.00 | N |
| HETATM | 3628 | CE1 | HIE B 761 | 43.921 | 45.771 | 84.945 | 1.00 | 0.00 | C |
| HETATM | 3629 | NE2 | HIE B 761 | 45.223 | 45.663 | 84.761 | 1.00 | 0.00 | N |
| ATOM   | 3630 | N   | SER B 762 | 42.683 | 47.940 | 82.252 | 1.00 | 0.00 | N |
| ATOM   | 3631 | CA  | SER B 762 | 41.375 | 47.392 | 82.038 | 1.00 | 0.00 | C |
| ATOM   | 3632 | C   | SER B 762 | 40.917 | 47.779 | 80.675 | 1.00 | 0.00 | C |
| ATOM   | 3633 | O   | SER B 762 | 41.707 | 47.878 | 79.740 | 1.00 | 0.00 | O |
| ATOM   | 3634 | CB  | SER B 762 | 40.302 | 47.845 | 83.048 | 1.00 | 0.00 | C |
| ATOM   | 3635 | OG  | SER B 762 | 40.625 | 47.378 | 84.348 | 1.00 | 0.00 | O |
| ATOM   | 3636 | N   | VAL B 763 | 39.593 | 47.981 | 80.541 | 1.00 | 0.00 | N |
| ATOM   | 3637 | CA  | VAL B 763 | 39.016 | 48.325 | 79.277 | 1.00 | 0.00 | C |
| ATOM   | 3638 | C   | VAL B 763 | 39.532 | 49.665 | 78.864 | 1.00 | 0.00 | C |
| ATOM   | 3639 | O   | VAL B 763 | 39.668 | 50.595 | 79.659 | 1.00 | 0.00 | O |
| ATOM   | 3640 | CB  | VAL B 763 | 37.517 | 48.400 | 79.305 | 1.00 | 0.00 | C |
| ATOM   | 3641 | CG1 | VAL B 763 | 37.101 | 49.508 | 80.285 | 1.00 | 0.00 | C |
| ATOM   | 3642 | CG2 | VAL B 763 | 37.011 | 48.621 | 77.869 | 1.00 | 0.00 | C |
| ATOM   | 3643 | N   | PRO B 764 | 39.855 | 49.720 | 77.600 | 1.00 | 0.00 | N |
| ATOM   | 3644 | CA  | PRO B 764 | 40.357 | 50.936 | 77.012 | 1.00 | 0.00 | C |
| ATOM   | 3645 | C   | PRO B 764 | 39.269 | 51.906 | 76.693 | 1.00 | 0.00 | C |

|                           |        |        |        |      |      |   |
|---------------------------|--------|--------|--------|------|------|---|
| ATOM 3646 O PRO B 764     | 38.099 | 51.527 | 76.707 | 1.00 | 0.00 | O |
| ATOM 3647 CB PRO B 764    | 41.134 | 50.514 | 75.767 | 1.00 | 0.00 | C |
| ATOM 3648 CG PRO B 764    | 41.576 | 49.077 | 76.076 | 1.00 | 0.00 | C |
| ATOM 3649 CD PRO B 764    | 40.481 | 48.544 | 77.011 | 1.00 | 0.00 | C |
| HETATM 3650 N HIE B 765   | 39.647 | 53.164 | 76.398 | 1.00 | 0.00 | N |
| HETATM 3651 CA HIE B 765  | 38.701 | 54.183 | 76.056 | 1.00 | 0.00 | C |
| HETATM 3652 C HIE B 765   | 38.279 | 53.899 | 74.646 | 1.00 | 0.00 | C |
| HETATM 3653 O HIE B 765   | 38.926 | 53.130 | 73.936 | 1.00 | 0.00 | O |
| HETATM 3654 CB HIE B 765  | 39.294 | 55.604 | 76.148 | 1.00 | 0.00 | C |
| HETATM 3655 CG HIE B 765  | 38.258 | 56.672 | 76.357 | 1.00 | 0.00 | C |
| HETATM 3656 CD2 HIE B 765 | 37.769 | 57.623 | 75.520 | 1.00 | 0.00 | C |
| HETATM 3657 ND1 HIE B 765 | 37.603 | 56.855 | 77.555 | 1.00 | 0.00 | N |
| HETATM 3658 CE1 HIE B 765 | 36.756 | 57.900 | 77.383 | 1.00 | 0.00 | C |
| HETATM 3659 NE2 HIE B 765 | 36.822 | 58.401 | 76.162 | 1.00 | 0.00 | N |
| ATOM 3660 N PRO B 766     | 37.181 | 54.466 | 74.222 | 1.00 | 0.00 | N |
| ATOM 3661 CA PRO B 766    | 36.675 | 54.173 | 72.910 | 1.00 | 0.00 | C |
| ATOM 3662 C PRO B 766     | 37.580 | 54.540 | 71.776 | 1.00 | 0.00 | C |
| ATOM 3663 O PRO B 766     | 37.484 | 53.876 | 70.746 | 1.00 | 0.00 | O |
| ATOM 3664 CB PRO B 766    | 35.292 | 54.815 | 72.855 | 1.00 | 0.00 | C |
| ATOM 3665 CG PRO B 766    | 34.821 | 54.767 | 74.320 | 1.00 | 0.00 | C |
| ATOM 3666 CD PRO B 766    | 36.117 | 54.828 | 75.145 | 1.00 | 0.00 | C |
| ATOM 3667 N PRO B 767     | 38.406 | 55.540 | 71.873 | 1.00 | 0.00 | N |
| ATOM 3668 CA PRO B 767    | 39.268 | 55.824 | 70.760 | 1.00 | 0.00 | C |
| ATOM 3669 C PRO B 767     | 40.248 | 54.722 | 70.548 | 1.00 | 0.00 | C |
| ATOM 3670 O PRO B 767     | 40.650 | 54.491 | 69.407 | 1.00 | 0.00 | O |
| ATOM 3671 CB PRO B 767    | 39.880 | 57.190 | 71.055 | 1.00 | 0.00 | C |
| ATOM 3672 CG PRO B 767    | 38.788 | 57.891 | 71.884 | 1.00 | 0.00 | C |
| ATOM 3673 CD PRO B 767    | 38.045 | 56.746 | 72.596 | 1.00 | 0.00 | C |
| ATOM 3674 N GLU B 768     | 40.658 | 54.040 | 71.634 | 1.00 | 0.00 | N |
| ATOM 3675 CA GLU B 768    | 41.575 | 52.947 | 71.510 | 1.00 | 0.00 | C |
| ATOM 3676 C GLU B 768     | 40.880 | 51.864 | 70.761 | 1.00 | 0.00 | C |
| ATOM 3677 O GLU B 768     | 41.469 | 51.204 | 69.909 | 1.00 | 0.00 | O |
| ATOM 3678 CB GLU B 768    | 42.006 | 52.372 | 72.871 | 1.00 | 0.00 | C |
| ATOM 3679 CG GLU B 768    | 42.975 | 51.193 | 72.756 | 1.00 | 0.00 | C |
| ATOM 3680 CD GLU B 768    | 44.303 | 51.714 | 72.235 | 1.00 | 0.00 | C |
| ATOM 3681 OE1 GLU B 768   | 44.280 | 52.507 | 71.253 | 1.00 | 0.00 | O |
| ATOM 3682 OE2 GLU B 768   | 45.359 | 51.332 | 72.810 | 1.00 | 0.00 | O |
| ATOM 3683 N LEU B 769     | 39.583 | 51.665 | 71.060 | 1.00 | 0.00 | N |
| ATOM 3684 CA LEU B 769    | 38.824 | 50.642 | 70.404 | 1.00 | 0.00 | C |
| ATOM 3685 C LEU B 769     | 38.778 | 50.972 | 68.958 | 1.00 | 0.00 | C |
| ATOM 3686 O LEU B 769     | 38.880 | 50.094 | 68.103 | 1.00 | 0.00 | O |
| ATOM 3687 CB LEU B 769    | 37.377 | 50.538 | 70.906 | 1.00 | 0.00 | C |
| ATOM 3688 CG LEU B 769    | 37.301 | 49.988 | 72.335 | 1.00 | 0.00 | C |
| ATOM 3689 CD1 LEU B 769   | 35.851 | 49.835 | 72.816 | 1.00 | 0.00 | C |

|      |      |               |        |        |        |      |      |   |
|------|------|---------------|--------|--------|--------|------|------|---|
| ATOM | 3690 | CD2 LEU B 769 | 38.117 | 48.690 | 72.437 | 1.00 | 0.00 | C |
| ATOM | 3691 | N VAL B 770   | 38.643 | 52.270 | 68.646 | 1.00 | 0.00 | N |
| ATOM | 3692 | CA VAL B 770  | 38.576 | 52.665 | 67.275 | 1.00 | 0.00 | C |
| ATOM | 3693 | C VAL B 770   | 39.849 | 52.243 | 66.626 | 1.00 | 0.00 | C |
| ATOM | 3694 | O VAL B 770   | 39.846 | 51.725 | 65.512 | 1.00 | 0.00 | O |
| ATOM | 3695 | CB VAL B 770  | 38.450 | 54.148 | 67.096 | 1.00 | 0.00 | C |
| ATOM | 3696 | CG1 VAL B 770 | 38.469 | 54.456 | 65.589 | 1.00 | 0.00 | C |
| ATOM | 3697 | CG2 VAL B 770 | 37.178 | 54.624 | 67.816 | 1.00 | 0.00 | C |
| ATOM | 3698 | N LEU B 771   | 40.980 | 52.421 | 67.329 | 1.00 | 0.00 | N |
| ATOM | 3699 | CA LEU B 771  | 42.255 | 52.086 | 66.767 | 1.00 | 0.00 | C |
| ATOM | 3700 | C LEU B 771   | 42.262 | 50.624 | 66.467 | 1.00 | 0.00 | C |
| ATOM | 3701 | O LEU B 771   | 42.814 | 50.195 | 65.454 | 1.00 | 0.00 | O |
| ATOM | 3702 | CB LEU B 771  | 43.429 | 52.378 | 67.716 | 1.00 | 0.00 | C |
| ATOM | 3703 | CG LEU B 771  | 43.588 | 53.877 | 68.026 | 1.00 | 0.00 | C |
| ATOM | 3704 | CD1 LEU B 771 | 44.828 | 54.141 | 68.898 | 1.00 | 0.00 | C |
| ATOM | 3705 | CD2 LEU B 771 | 43.583 | 54.718 | 66.738 | 1.00 | 0.00 | C |
| ATOM | 3706 | N TYR B 772   | 41.638 | 49.813 | 67.341 | 1.00 | 0.00 | N |
| ATOM | 3707 | CA TYR B 772  | 41.622 | 48.402 | 67.103 | 1.00 | 0.00 | C |
| ATOM | 3708 | C TYR B 772   | 40.936 | 48.178 | 65.798 | 1.00 | 0.00 | C |
| ATOM | 3709 | O TYR B 772   | 41.370 | 47.362 | 64.987 | 1.00 | 0.00 | O |
| ATOM | 3710 | CB TYR B 772  | 40.864 | 47.607 | 68.180 | 1.00 | 0.00 | C |
| ATOM | 3711 | CG TYR B 772  | 41.687 | 47.655 | 69.424 | 1.00 | 0.00 | C |
| ATOM | 3712 | CD1 TYR B 772 | 42.775 | 46.825 | 69.558 | 1.00 | 0.00 | C |
| ATOM | 3713 | CD2 TYR B 772 | 41.370 | 48.513 | 70.450 | 1.00 | 0.00 | C |
| ATOM | 3714 | CE1 TYR B 772 | 43.540 | 46.855 | 70.699 | 1.00 | 0.00 | C |
| ATOM | 3715 | CE2 TYR B 772 | 42.135 | 48.547 | 71.591 | 1.00 | 0.00 | C |
| ATOM | 3716 | CZ TYR B 772  | 43.223 | 47.718 | 71.716 | 1.00 | 0.00 | C |
| ATOM | 3717 | OH TYR B 772  | 44.009 | 47.748 | 72.887 | 1.00 | 0.00 | O |
| ATOM | 3718 | N SER B 773   | 39.848 | 48.925 | 65.560 | 1.00 | 0.00 | N |
| ATOM | 3719 | CA SER B 773  | 39.090 | 48.798 | 64.353 | 1.00 | 0.00 | C |
| ATOM | 3720 | C SER B 773   | 39.989 | 49.085 | 63.188 | 1.00 | 0.00 | C |
| ATOM | 3721 | O SER B 773   | 39.972 | 48.360 | 62.194 | 1.00 | 0.00 | O |
| ATOM | 3722 | CB SER B 773  | 37.940 | 49.813 | 64.313 | 1.00 | 0.00 | C |
| ATOM | 3723 | OG SER B 773  | 37.345 | 49.818 | 63.028 | 1.00 | 0.00 | O |
| ATOM | 3724 | N LEU B 774   | 40.816 | 50.144 | 63.289 | 1.00 | 0.00 | N |
| ATOM | 3725 | CA LEU B 774  | 41.694 | 50.493 | 62.209 | 1.00 | 0.00 | C |
| ATOM | 3726 | C LEU B 774   | 42.666 | 49.380 | 61.986 | 1.00 | 0.00 | C |
| ATOM | 3727 | O LEU B 774   | 43.014 | 49.069 | 60.849 | 1.00 | 0.00 | O |
| ATOM | 3728 | CB LEU B 774  | 42.501 | 51.785 | 62.445 | 1.00 | 0.00 | C |
| ATOM | 3729 | CG LEU B 774  | 41.685 | 53.084 | 62.288 | 1.00 | 0.00 | C |
| ATOM | 3730 | CD1 LEU B 774 | 41.241 | 53.286 | 60.830 | 1.00 | 0.00 | C |
| ATOM | 3731 | CD2 LEU B 774 | 40.507 | 53.150 | 63.269 | 1.00 | 0.00 | C |
| ATOM | 3732 | N VAL B 775   | 43.131 | 48.738 | 63.067 | 1.00 | 0.00 | N |
| ATOM | 3733 | CA VAL B 775  | 44.065 | 47.660 | 62.910 | 1.00 | 0.00 | C |

|      |      |     |           |        |        |        |      |      |   |
|------|------|-----|-----------|--------|--------|--------|------|------|---|
| ATOM | 3734 | C   | VAL B 775 | 43.384 | 46.611 | 62.095 | 1.00 | 0.00 | C |
| ATOM | 3735 | O   | VAL B 775 | 43.997 | 45.987 | 61.227 | 1.00 | 0.00 | O |
| ATOM | 3736 | CB  | VAL B 775 | 44.445 | 47.044 | 64.224 | 1.00 | 0.00 | C |
| ATOM | 3737 | CG1 | VAL B 775 | 45.334 | 45.821 | 63.954 | 1.00 | 0.00 | C |
| ATOM | 3738 | CG2 | VAL B 775 | 45.118 | 48.123 | 65.094 | 1.00 | 0.00 | C |
| ATOM | 3739 | N   | PHE B 776 | 42.083 | 46.403 | 62.355 | 1.00 | 0.00 | N |
| ATOM | 3740 | CA  | PHE B 776 | 41.314 | 45.417 | 61.659 | 1.00 | 0.00 | C |
| ATOM | 3741 | C   | PHE B 776 | 41.279 | 45.748 | 60.202 | 1.00 | 0.00 | C |
| ATOM | 3742 | O   | PHE B 776 | 41.467 | 44.868 | 59.364 | 1.00 | 0.00 | O |
| ATOM | 3743 | CB  | PHE B 776 | 39.854 | 45.358 | 62.142 | 1.00 | 0.00 | C |
| ATOM | 3744 | CG  | PHE B 776 | 39.092 | 44.501 | 61.189 | 1.00 | 0.00 | C |
| ATOM | 3745 | CD1 | PHE B 776 | 39.171 | 43.129 | 61.247 | 1.00 | 0.00 | C |
| ATOM | 3746 | CD2 | PHE B 776 | 38.285 | 45.079 | 60.234 | 1.00 | 0.00 | C |
| ATOM | 3747 | CE1 | PHE B 776 | 38.461 | 42.351 | 60.365 | 1.00 | 0.00 | C |
| ATOM | 3748 | CE2 | PHE B 776 | 37.573 | 44.306 | 59.346 | 1.00 | 0.00 | C |
| ATOM | 3749 | CZ  | PHE B 776 | 37.663 | 42.937 | 59.411 | 1.00 | 0.00 | C |
| ATOM | 3750 | N   | VAL B 777 | 41.050 | 47.026 | 59.849 | 1.00 | 0.00 | N |
| ATOM | 3751 | CA  | VAL B 777 | 40.945 | 47.346 | 58.453 | 1.00 | 0.00 | C |
| ATOM | 3752 | C   | VAL B 777 | 42.248 | 47.041 | 57.790 | 1.00 | 0.00 | C |
| ATOM | 3753 | O   | VAL B 777 | 42.285 | 46.515 | 56.678 | 1.00 | 0.00 | O |
| ATOM | 3754 | CB  | VAL B 777 | 40.584 | 48.778 | 58.169 | 1.00 | 0.00 | C |
| ATOM | 3755 | CG1 | VAL B 777 | 41.781 | 49.688 | 58.485 | 1.00 | 0.00 | C |
| ATOM | 3756 | CG2 | VAL B 777 | 40.113 | 48.872 | 56.708 | 1.00 | 0.00 | C |
| ATOM | 3757 | N   | LEU B 778 | 43.371 | 47.349 | 58.462 | 1.00 | 0.00 | N |
| ATOM | 3758 | CA  | LEU B 778 | 44.659 | 47.114 | 57.884 | 1.00 | 0.00 | C |
| ATOM | 3759 | C   | LEU B 778 | 44.814 | 45.641 | 57.688 | 1.00 | 0.00 | C |
| ATOM | 3760 | O   | LEU B 778 | 45.353 | 45.189 | 56.679 | 1.00 | 0.00 | O |
| ATOM | 3761 | CB  | LEU B 778 | 45.800 | 47.585 | 58.799 | 1.00 | 0.00 | C |
| ATOM | 3762 | CG  | LEU B 778 | 45.738 | 49.090 | 59.123 | 1.00 | 0.00 | C |
| ATOM | 3763 | CD1 | LEU B 778 | 46.918 | 49.526 | 60.002 | 1.00 | 0.00 | C |
| ATOM | 3764 | CD2 | LEU B 778 | 45.594 | 49.931 | 57.845 | 1.00 | 0.00 | C |
| ATOM | 3765 | N   | PHE B 779 | 44.330 | 44.850 | 58.661 | 1.00 | 0.00 | N |
| ATOM | 3766 | CA  | PHE B 779 | 44.467 | 43.425 | 58.609 | 1.00 | 0.00 | C |
| ATOM | 3767 | C   | PHE B 779 | 43.758 | 42.893 | 57.406 | 1.00 | 0.00 | C |
| ATOM | 3768 | O   | PHE B 779 | 44.317 | 42.097 | 56.652 | 1.00 | 0.00 | O |
| ATOM | 3769 | CB  | PHE B 779 | 43.863 | 42.725 | 59.836 | 1.00 | 0.00 | C |
| ATOM | 3770 | CG  | PHE B 779 | 44.066 | 41.265 | 59.636 | 1.00 | 0.00 | C |
| ATOM | 3771 | CD1 | PHE B 779 | 45.270 | 40.679 | 59.954 | 1.00 | 0.00 | C |
| ATOM | 3772 | CD2 | PHE B 779 | 43.051 | 40.487 | 59.134 | 1.00 | 0.00 | C |
| ATOM | 3773 | CE1 | PHE B 779 | 45.454 | 39.332 | 59.766 | 1.00 | 0.00 | C |
| ATOM | 3774 | CE2 | PHE B 779 | 43.230 | 39.139 | 58.945 | 1.00 | 0.00 | C |
| ATOM | 3775 | CZ  | PHE B 779 | 44.434 | 38.559 | 59.263 | 1.00 | 0.00 | C |
| ATOM | 3776 | N   | CYS B 780 | 42.504 | 43.325 | 57.180 | 1.00 | 0.00 | N |
| ATOM | 3777 | CA  | CYS B 780 | 41.768 | 42.777 | 56.076 | 1.00 | 0.00 | C |

|        |      |     |           |        |        |        |      |      |     |
|--------|------|-----|-----------|--------|--------|--------|------|------|-----|
| ATOM   | 3778 | C   | CYS B 780 | 42.438 | 43.152 | 54.790 | 1.00 | 0.00 | C   |
| ATOM   | 3779 | O   | CYS B 780 | 42.519 | 42.349 | 53.867 | 1.00 | 0.00 | O   |
| ATOM   | 3780 | CB  | CYS B 780 | 40.294 | 43.232 | 56.016 | 1.00 | 0.00 | C   |
| ATOM   | 3781 | SG  | CYS B 780 | 40.077 | 45.000 | 55.663 | 1.00 | 0.00 | S   |
| ATOM   | 3782 | N   | ASP B 781 | 42.948 | 44.393 | 54.692 | 1.00 | 0.00 | N   |
| ATOM   | 3783 | CA  | ASP B 781 | 43.566 | 44.812 | 53.467 | 1.00 | 0.00 | C   |
| ATOM   | 3784 | C   | ASP B 781 | 44.768 | 43.966 | 53.206 | 1.00 | 0.00 | C   |
| ATOM   | 3785 | O   | ASP B 781 | 44.961 | 43.471 | 52.093 | 1.00 | 0.00 | O   |
| ATOM   | 3786 | CB  | ASP B 781 | 44.049 | 46.274 | 53.522 | 1.00 | 0.00 | C   |
| ATOM   | 3787 | CG  | ASP B 781 | 44.600 | 46.670 | 52.157 | 1.00 | 0.00 | C   |
| ATOM   | 3788 | OD1 | ASP B 781 | 44.514 | 45.835 | 51.213 | 1.00 | 0.00 | O   |
| ATOM   | 3789 | OD2 | ASP B 781 | 45.118 | 47.811 | 52.039 | 1.00 | 0.00 | O   |
| HETATM | 3790 | N   | GU1 B 782 | 45.613 | 43.775 | 54.255 | 1.00 | 0.00 | N   |
| HETATM | 3791 | CA  | GU1 B 782 | 46.839 | 43.024 | 54.008 | 1.00 | 0.00 | C   |
| HETATM | 3792 | C   | GU1 B 782 | 46.532 | 41.590 | 53.646 | 1.00 | 0.00 | C   |
| HETATM | 3793 | O   | GU1 B 782 | 47.219 | 41.042 | 52.825 | 1.00 | 0.00 | O   |
| HETATM | 3794 | CB  | GU1 B 782 | 47.755 | 43.084 | 55.263 | 1.00 | 0.00 | C   |
| HETATM | 3795 | CG  | GU1 B 782 | 48.406 | 44.473 | 55.562 | 1.00 | 0.00 | C   |
| HETATM | 3796 | CD  | GU1 B 782 | 48.700 | 45.398 | 54.396 | 1.00 | 0.00 | C   |
| HETATM | 3797 | OE1 | GU1 B 782 | 48.042 | 46.442 | 54.224 | 1.00 | 0.00 | O   |
| HETATM | 3798 | OE2 | GU1 B 782 | 49.633 | 45.061 | 53.639 | 1.00 | 0.00 | O1- |
| ATOM   | 3799 | N   | VAL B 783 | 45.508 | 41.019 | 54.290 | 1.00 | 0.00 | N   |
| ATOM   | 3800 | CA  | VAL B 783 | 45.201 | 39.656 | 53.972 | 1.00 | 0.00 | C   |
| ATOM   | 3801 | C   | VAL B 783 | 44.770 | 39.578 | 52.542 | 1.00 | 0.00 | C   |
| ATOM   | 3802 | O   | VAL B 783 | 45.081 | 38.608 | 51.849 | 1.00 | 0.00 | O   |
| ATOM   | 3803 | CB  | VAL B 783 | 44.184 | 39.016 | 54.878 | 1.00 | 0.00 | C   |
| ATOM   | 3804 | CG1 | VAL B 783 | 44.831 | 38.885 | 56.264 | 1.00 | 0.00 | C   |
| ATOM   | 3805 | CG2 | VAL B 783 | 42.890 | 39.843 | 54.904 | 1.00 | 0.00 | C   |
| ATOM   | 3806 | N   | ARG B 784 | 44.042 | 40.596 | 52.051 | 1.00 | 0.00 | N   |
| ATOM   | 3807 | CA  | ARG B 784 | 43.621 | 40.567 | 50.682 | 1.00 | 0.00 | C   |
| ATOM   | 3808 | C   | ARG B 784 | 44.834 | 40.557 | 49.806 | 1.00 | 0.00 | C   |
| ATOM   | 3809 | O   | ARG B 784 | 44.899 | 39.812 | 48.831 | 1.00 | 0.00 | O   |
| ATOM   | 3810 | CB  | ARG B 784 | 42.773 | 41.777 | 50.265 | 1.00 | 0.00 | C   |
| ATOM   | 3811 | CG  | ARG B 784 | 42.433 | 41.760 | 48.776 | 1.00 | 0.00 | C   |
| ATOM   | 3812 | CD  | ARG B 784 | 41.564 | 40.571 | 48.367 | 1.00 | 0.00 | C   |
| ATOM   | 3813 | NE  | ARG B 784 | 41.541 | 40.520 | 46.876 | 1.00 | 0.00 | N   |
| ATOM   | 3814 | CZ  | ARG B 784 | 40.852 | 39.530 | 46.238 | 1.00 | 0.00 | C   |
| ATOM   | 3815 | NH1 | ARG B 784 | 40.136 | 38.624 | 46.964 | 1.00 | 0.00 | N   |
| ATOM   | 3816 | NH2 | ARG B 784 | 40.880 | 39.446 | 44.877 | 1.00 | 0.00 | N   |
| HETATM | 3817 | N   | GN1 B 785 | 45.837 | 41.382 | 50.151 | 1.00 | 0.00 | N   |
| HETATM | 3818 | CA  | GN1 B 785 | 47.047 | 41.494 | 49.385 | 1.00 | 0.00 | C   |
| HETATM | 3819 | C   | GN1 B 785 | 47.736 | 40.170 | 49.438 | 1.00 | 0.00 | C   |
| HETATM | 3820 | O   | GN1 B 785 | 48.315 | 39.710 | 48.455 | 1.00 | 0.00 | O   |
| HETATM | 3821 | CB  | GN1 B 785 | 48.003 | 42.548 | 49.980 | 1.00 | 0.00 | C   |

|                           |        |        |        |      |      |   |
|---------------------------|--------|--------|--------|------|------|---|
| HETATM 3822 CG GNI B 785  | 49.332 | 42.689 | 49.239 | 1.00 | 0.00 | C |
| HETATM 3823 CD GNI B 785  | 49.976 | 43.988 | 49.704 | 1.00 | 0.00 | C |
| HETATM 3824 NE2 GNI B 785 | 49.668 | 45.108 | 48.996 | 1.00 | 0.00 | N |
| HETATM 3825 OE1 GNI B 785 | 50.734 | 44.009 | 50.674 | 1.00 | 0.00 | O |
| ATOM 3826 N TRP B 786     | 47.666 | 39.508 | 50.601 | 1.00 | 0.00 | N |
| ATOM 3827 CA TRP B 786    | 48.294 | 38.237 | 50.799 | 1.00 | 0.00 | C |
| ATOM 3828 C TRP B 786     | 47.695 | 37.302 | 49.800 | 1.00 | 0.00 | C |
| ATOM 3829 O TRP B 786     | 48.393 | 36.519 | 49.161 | 1.00 | 0.00 | O |
| ATOM 3830 CB TRP B 786    | 47.979 | 37.677 | 52.197 | 1.00 | 0.00 | C |
| ATOM 3831 CG TRP B 786    | 48.654 | 36.376 | 52.567 | 1.00 | 0.00 | C |
| ATOM 3832 CD1 TRP B 786   | 48.295 | 35.093 | 52.267 | 1.00 | 0.00 | C |
| ATOM 3833 CD2 TRP B 786   | 49.811 | 36.287 | 53.414 | 1.00 | 0.00 | C |
| ATOM 3834 CE2 TRP B 786   | 50.094 | 34.934 | 53.584 | 1.00 | 0.00 | C |
| ATOM 3835 CE3 TRP B 786   | 50.563 | 37.253 | 54.016 | 1.00 | 0.00 | C |
| ATOM 3836 NE1 TRP B 786   | 49.160 | 34.211 | 52.873 | 1.00 | 0.00 | N |
| ATOM 3837 CZ2 TRP B 786   | 51.140 | 34.526 | 54.362 | 1.00 | 0.00 | C |
| ATOM 3838 CZ3 TRP B 786   | 51.630 | 36.840 | 54.784 | 1.00 | 0.00 | C |
| ATOM 3839 CH2 TRP B 786   | 51.911 | 35.501 | 54.954 | 1.00 | 0.00 | C |
| ATOM 3840 N TYR B 787     | 46.362 | 37.375 | 49.641 | 1.00 | 0.00 | N |
| ATOM 3841 CA TYR B 787    | 45.654 | 36.504 | 48.752 | 1.00 | 0.00 | C |
| ATOM 3842 C TYR B 787     | 46.073 | 36.734 | 47.335 | 1.00 | 0.00 | C |
| ATOM 3843 O TYR B 787     | 46.251 | 35.778 | 46.581 | 1.00 | 0.00 | O |
| ATOM 3844 CB TYR B 787    | 44.128 | 36.692 | 48.809 | 1.00 | 0.00 | C |
| ATOM 3845 CG TYR B 787    | 43.547 | 35.830 | 47.739 | 1.00 | 0.00 | C |
| ATOM 3846 CD1 TYR B 787   | 43.431 | 34.471 | 47.918 | 1.00 | 0.00 | C |
| ATOM 3847 CD2 TYR B 787   | 43.113 | 36.386 | 46.558 | 1.00 | 0.00 | C |
| ATOM 3848 CE1 TYR B 787   | 42.894 | 33.679 | 46.926 | 1.00 | 0.00 | C |
| ATOM 3849 CE2 TYR B 787   | 42.576 | 35.599 | 45.564 | 1.00 | 0.00 | C |
| ATOM 3850 CZ TYR B 787    | 42.466 | 34.243 | 45.749 | 1.00 | 0.00 | C |
| ATOM 3851 OH TYR B 787    | 41.916 | 33.432 | 44.734 | 1.00 | 0.00 | O |
| ATOM 3852 N VAL B 788     | 46.253 | 38.003 | 46.925 | 1.00 | 0.00 | N |
| ATOM 3853 CA VAL B 788    | 46.490 | 38.260 | 45.536 | 1.00 | 0.00 | C |
| ATOM 3854 C VAL B 788     | 47.727 | 37.559 | 45.059 | 1.00 | 0.00 | C |
| ATOM 3855 O VAL B 788     | 47.693 | 36.907 | 44.018 | 1.00 | 0.00 | O |
| ATOM 3856 CB VAL B 788    | 46.616 | 39.723 | 45.195 | 1.00 | 0.00 | C |
| ATOM 3857 CG1 VAL B 788   | 45.319 | 40.430 | 45.622 | 1.00 | 0.00 | C |
| ATOM 3858 CG2 VAL B 788   | 47.897 | 40.304 | 45.816 | 1.00 | 0.00 | C |
| ATOM 3859 N ASN B 789     | 48.858 | 37.646 | 45.792 | 1.00 | 0.00 | N |
| ATOM 3860 CA ASN B 789    | 50.036 | 37.002 | 45.271 | 1.00 | 0.00 | C |
| ATOM 3861 C ASN B 789     | 50.455 | 35.929 | 46.221 | 1.00 | 0.00 | C |
| ATOM 3862 O ASN B 789     | 50.714 | 36.203 | 47.391 | 1.00 | 0.00 | O |
| ATOM 3863 CB ASN B 789    | 51.230 | 37.957 | 45.107 | 1.00 | 0.00 | C |
| ATOM 3864 CG ASN B 789    | 50.900 | 38.935 | 43.987 | 1.00 | 0.00 | C |
| ATOM 3865 ND2 ASN B 789   | 51.125 | 40.251 | 44.245 | 1.00 | 0.00 | N |

|      |      |               |        |        |        |      |      |   |
|------|------|---------------|--------|--------|--------|------|------|---|
| ATOM | 3866 | OD1 ASN B 789 | 50.446 | 38.538 | 42.916 | 1.00 | 0.00 | O |
| ATOM | 3867 | N GLY B 790   | 50.481 | 34.661 | 45.758 | 1.00 | 0.00 | N |
| ATOM | 3868 | CA GLY B 790  | 50.903 | 33.631 | 46.660 | 1.00 | 0.00 | C |
| ATOM | 3869 | C GLY B 790   | 52.373 | 33.722 | 46.951 | 1.00 | 0.00 | C |
| ATOM | 3870 | O GLY B 790   | 52.767 | 33.884 | 48.104 | 1.00 | 0.00 | O |
| ATOM | 3871 | N VAL B 791   | 53.222 | 33.603 | 45.905 | 1.00 | 0.00 | N |
| ATOM | 3872 | CA VAL B 791  | 54.657 | 33.620 | 46.045 | 1.00 | 0.00 | C |
| ATOM | 3873 | C VAL B 791   | 55.201 | 35.003 | 46.201 | 1.00 | 0.00 | C |
| ATOM | 3874 | O VAL B 791   | 56.042 | 35.265 | 47.060 | 1.00 | 0.00 | O |
| ATOM | 3875 | CB VAL B 791  | 55.363 | 33.019 | 44.865 | 1.00 | 0.00 | C |
| ATOM | 3876 | CG1 VAL B 791 | 56.879 | 33.200 | 45.062 | 1.00 | 0.00 | C |
| ATOM | 3877 | CG2 VAL B 791 | 54.920 | 31.551 | 44.727 | 1.00 | 0.00 | C |
| ATOM | 3878 | N ASN B 792   | 54.700 | 35.927 | 45.364 | 1.00 | 0.00 | N |
| ATOM | 3879 | CA ASN B 792  | 55.246 | 37.245 | 45.263 | 1.00 | 0.00 | C |
| ATOM | 3880 | C ASN B 792   | 55.104 | 37.945 | 46.572 | 1.00 | 0.00 | C |
| ATOM | 3881 | O ASN B 792   | 55.977 | 38.707 | 46.978 | 1.00 | 0.00 | O |
| ATOM | 3882 | CB ASN B 792  | 54.554 | 38.102 | 44.189 | 1.00 | 0.00 | C |
| ATOM | 3883 | CG ASN B 792  | 55.451 | 39.296 | 43.896 | 1.00 | 0.00 | C |
| ATOM | 3884 | ND2 ASN B 792 | 55.764 | 39.508 | 42.590 | 1.00 | 0.00 | N |
| ATOM | 3885 | OD1 ASN B 792 | 55.875 | 40.013 | 44.801 | 1.00 | 0.00 | O |
| ATOM | 3886 | N TYR B 793   | 53.995 | 37.710 | 47.275 | 1.00 | 0.00 | N |
| ATOM | 3887 | CA TYR B 793  | 53.795 | 38.389 | 48.518 | 1.00 | 0.00 | C |
| ATOM | 3888 | C TYR B 793   | 54.893 | 37.968 | 49.451 | 1.00 | 0.00 | C |
| ATOM | 3889 | O TYR B 793   | 55.520 | 38.794 | 50.108 | 1.00 | 0.00 | O |
| ATOM | 3890 | CB TYR B 793  | 52.456 | 38.000 | 49.164 | 1.00 | 0.00 | C |
| ATOM | 3891 | CG TYR B 793  | 52.214 | 38.864 | 50.353 | 1.00 | 0.00 | C |
| ATOM | 3892 | CD1 TYR B 793 | 51.651 | 40.109 | 50.200 | 1.00 | 0.00 | C |
| ATOM | 3893 | CD2 TYR B 793 | 52.541 | 38.435 | 51.619 | 1.00 | 0.00 | C |
| ATOM | 3894 | CE1 TYR B 793 | 51.415 | 40.918 | 51.287 | 1.00 | 0.00 | C |
| ATOM | 3895 | CE2 TYR B 793 | 52.308 | 39.239 | 52.711 | 1.00 | 0.00 | C |
| ATOM | 3896 | CZ TYR B 793  | 51.743 | 40.482 | 52.547 | 1.00 | 0.00 | C |
| ATOM | 3897 | OH TYR B 793  | 51.497 | 41.308 | 53.663 | 1.00 | 0.00 | O |
| ATOM | 3898 | N PHE B 794   | 55.179 | 36.659 | 49.504 | 1.00 | 0.00 | N |
| ATOM | 3899 | CA PHE B 794  | 56.179 | 36.137 | 50.389 | 1.00 | 0.00 | C |
| ATOM | 3900 | C PHE B 794   | 57.535 | 36.615 | 49.992 | 1.00 | 0.00 | C |
| ATOM | 3901 | O PHE B 794   | 58.396 | 36.797 | 50.849 | 1.00 | 0.00 | O |
| ATOM | 3902 | CB PHE B 794  | 56.264 | 34.602 | 50.420 | 1.00 | 0.00 | C |
| ATOM | 3903 | CG PHE B 794  | 55.075 | 34.078 | 51.141 | 1.00 | 0.00 | C |
| ATOM | 3904 | CD1 PHE B 794 | 54.970 | 34.217 | 52.505 | 1.00 | 0.00 | C |
| ATOM | 3905 | CD2 PHE B 794 | 54.081 | 33.426 | 50.457 | 1.00 | 0.00 | C |
| ATOM | 3906 | CE1 PHE B 794 | 53.871 | 33.725 | 53.170 | 1.00 | 0.00 | C |
| ATOM | 3907 | CE2 PHE B 794 | 52.982 | 32.929 | 51.113 | 1.00 | 0.00 | C |
| ATOM | 3908 | CZ PHE B 794  | 52.876 | 33.083 | 52.475 | 1.00 | 0.00 | C |
| ATOM | 3909 | N THR B 795   | 57.780 | 36.810 | 48.685 | 1.00 | 0.00 | N |

|        |      |     |           |        |        |        |      |      |   |
|--------|------|-----|-----------|--------|--------|--------|------|------|---|
| ATOM   | 3910 | CA  | THR B 795 | 59.115 | 37.115 | 48.269 | 1.00 | 0.00 | C |
| ATOM   | 3911 | C   | THR B 795 | 59.625 | 38.350 | 48.955 | 1.00 | 0.00 | C |
| ATOM   | 3912 | O   | THR B 795 | 60.735 | 38.341 | 49.482 | 1.00 | 0.00 | O |
| ATOM   | 3913 | CB  | THR B 795 | 59.260 | 37.285 | 46.781 | 1.00 | 0.00 | C |
| ATOM   | 3914 | CG2 | THR B 795 | 58.618 | 38.594 | 46.310 | 1.00 | 0.00 | C |
| ATOM   | 3915 | OG1 | THR B 795 | 60.631 | 37.306 | 46.448 | 1.00 | 0.00 | O |
| ATOM   | 3916 | N   | ASP B 796 | 58.839 | 39.445 | 48.991 | 1.00 | 0.00 | N |
| ATOM   | 3917 | CA  | ASP B 796 | 59.308 | 40.636 | 49.645 | 1.00 | 0.00 | C |
| ATOM   | 3918 | C   | ASP B 796 | 59.280 | 40.366 | 51.115 | 1.00 | 0.00 | C |
| ATOM   | 3919 | O   | ASP B 796 | 58.374 | 39.706 | 51.625 | 1.00 | 0.00 | O |
| ATOM   | 3920 | CB  | ASP B 796 | 58.410 | 41.857 | 49.348 | 1.00 | 0.00 | C |
| ATOM   | 3921 | CG  | ASP B 796 | 59.107 | 43.153 | 49.758 | 1.00 | 0.00 | C |
| ATOM   | 3922 | OD1 | ASP B 796 | 59.799 | 43.168 | 50.807 | 1.00 | 0.00 | O |
| ATOM   | 3923 | OD2 | ASP B 796 | 58.949 | 44.156 | 49.010 | 1.00 | 0.00 | O |
| ATOM   | 3924 | N   | LEU B 797 | 60.320 | 40.821 | 51.833 | 1.00 | 0.00 | N |
| ATOM   | 3925 | CA  | LEU B 797 | 60.403 | 40.661 | 53.255 | 1.00 | 0.00 | C |
| ATOM   | 3926 | C   | LEU B 797 | 59.433 | 41.569 | 53.947 | 1.00 | 0.00 | C |
| ATOM   | 3927 | O   | LEU B 797 | 58.792 | 41.187 | 54.922 | 1.00 | 0.00 | O |
| ATOM   | 3928 | CB  | LEU B 797 | 61.807 | 41.009 | 53.779 | 1.00 | 0.00 | C |
| ATOM   | 3929 | CG  | LEU B 797 | 62.908 | 40.092 | 53.213 | 1.00 | 0.00 | C |
| ATOM   | 3930 | CD1 | LEU B 797 | 64.292 | 40.467 | 53.758 | 1.00 | 0.00 | C |
| ATOM   | 3931 | CD2 | LEU B 797 | 62.564 | 38.611 | 53.437 | 1.00 | 0.00 | C |
| ATOM   | 3932 | N   | TRP B 798 | 59.301 | 42.809 | 53.454 | 1.00 | 0.00 | N |
| ATOM   | 3933 | CA  | TRP B 798 | 58.523 | 43.798 | 54.144 | 1.00 | 0.00 | C |
| ATOM   | 3934 | C   | TRP B 798 | 57.083 | 43.426 | 54.204 | 1.00 | 0.00 | C |
| ATOM   | 3935 | O   | TRP B 798 | 56.456 | 43.557 | 55.254 | 1.00 | 0.00 | O |
| ATOM   | 3936 | CB  | TRP B 798 | 58.670 | 45.191 | 53.512 | 1.00 | 0.00 | C |
| ATOM   | 3937 | CG  | TRP B 798 | 60.079 | 45.717 | 53.655 | 1.00 | 0.00 | C |
| ATOM   | 3938 | CD1 | TRP B 798 | 61.098 | 45.739 | 52.747 | 1.00 | 0.00 | C |
| ATOM   | 3939 | CD2 | TRP B 798 | 60.605 | 46.269 | 54.871 | 1.00 | 0.00 | C |
| ATOM   | 3940 | CE2 | TRP B 798 | 61.939 | 46.600 | 54.631 | 1.00 | 0.00 | C |
| ATOM   | 3941 | CE3 | TRP B 798 | 60.026 | 46.478 | 56.090 | 1.00 | 0.00 | C |
| ATOM   | 3942 | NE1 | TRP B 798 | 62.228 | 46.272 | 53.324 | 1.00 | 0.00 | N |
| ATOM   | 3943 | CZ2 | TRP B 798 | 62.718 | 47.147 | 55.613 | 1.00 | 0.00 | C |
| ATOM   | 3944 | CZ3 | TRP B 798 | 60.812 | 47.035 | 57.076 | 1.00 | 0.00 | C |
| ATOM   | 3945 | CH2 | TRP B 798 | 62.132 | 47.362 | 56.840 | 1.00 | 0.00 | C |
| HETATM | 3946 | N   | ANI B 799 | 56.510 | 42.937 | 53.055 | 1.00 | 0.00 | N |
| HETATM | 3947 | CA  | ANI B 799 | 55.078 | 42.701 | 53.218 | 1.00 | 0.00 | C |
| HETATM | 3948 | C   | ANI B 799 | 54.824 | 41.540 | 54.150 | 1.00 | 0.00 | C |
| HETATM | 3949 | O   | ANI B 799 | 53.794 | 41.570 | 54.812 | 1.00 | 0.00 | O |
| HETATM | 3950 | CB  | ANI B 799 | 54.433 | 42.441 | 51.826 | 1.00 | 0.00 | C |
| HETATM | 3951 | CG  | ANI B 799 | 54.213 | 43.660 | 50.924 | 1.00 | 0.00 | C |
| HETATM | 3952 | ND2 | ANI B 799 | 55.121 | 43.958 | 50.035 | 1.00 | 0.00 | N |
| HETATM | 3953 | OD1 | ANI B 799 | 53.208 | 44.349 | 50.995 | 1.00 | 0.00 | O |



|        |      |     |           |        |        |        |      |      |     |
|--------|------|-----|-----------|--------|--------|--------|------|------|-----|
| ATOM   | 3954 | N   | VAL B 800 | 55.743 | 40.574 | 54.311 | 1.00 | 0.00 | N   |
| ATOM   | 3955 | CA  | VAL B 800 | 55.506 | 39.587 | 55.328 | 1.00 | 0.00 | C   |
| ATOM   | 3956 | C   | VAL B 800 | 55.686 | 40.224 | 56.676 | 1.00 | 0.00 | C   |
| ATOM   | 3957 | O   | VAL B 800 | 55.004 | 39.873 | 57.637 | 1.00 | 0.00 | O   |
| ATOM   | 3958 | CB  | VAL B 800 | 56.365 | 38.351 | 55.239 | 1.00 | 0.00 | C   |
| ATOM   | 3959 | CG1 | VAL B 800 | 56.105 | 37.679 | 53.880 | 1.00 | 0.00 | C   |
| ATOM   | 3960 | CG2 | VAL B 800 | 57.835 | 38.699 | 55.510 | 1.00 | 0.00 | C   |
| ATOM   | 3961 | N   | MET B 801 | 56.617 | 41.191 | 56.787 | 1.00 | 0.00 | N   |
| ATOM   | 3962 | CA  | MET B 801 | 56.902 | 41.822 | 58.046 | 1.00 | 0.00 | C   |
| ATOM   | 3963 | C   | MET B 801 | 55.682 | 42.520 | 58.554 | 1.00 | 0.00 | C   |
| ATOM   | 3964 | O   | MET B 801 | 55.395 | 42.482 | 59.749 | 1.00 | 0.00 | O   |
| ATOM   | 3965 | CB  | MET B 801 | 58.019 | 42.877 | 57.960 | 1.00 | 0.00 | C   |
| ATOM   | 3966 | CG  | MET B 801 | 58.174 | 43.689 | 59.250 | 1.00 | 0.00 | C   |
| ATOM   | 3967 | SD  | MET B 801 | 58.803 | 42.763 | 60.679 | 1.00 | 0.00 | S   |
| ATOM   | 3968 | CE  | MET B 801 | 60.528 | 42.779 | 60.120 | 1.00 | 0.00 | C   |
| HETATM | 3969 | N   | AP1 B 802 | 54.930 | 43.181 | 57.661 | 1.00 | 0.00 | N   |
| HETATM | 3970 | CA  | AP1 B 802 | 53.774 | 43.917 | 58.085 | 1.00 | 0.00 | C   |
| HETATM | 3971 | C   | AP1 B 802 | 52.778 | 42.973 | 58.689 | 1.00 | 0.00 | C   |
| HETATM | 3972 | O   | AP1 B 802 | 52.161 | 43.281 | 59.709 | 1.00 | 0.00 | O   |
| HETATM | 3973 | CB  | AP1 B 802 | 53.082 | 44.644 | 56.922 | 1.00 | 0.00 | C   |
| HETATM | 3974 | CG  | AP1 B 802 | 54.097 | 44.882 | 55.812 | 1.00 | 0.00 | C   |
| HETATM | 3975 | OD1 | AP1 B 802 | 55.266 | 45.228 | 56.129 | 1.00 | 0.00 | O1- |
| HETATM | 3976 | OD2 | AP1 B 802 | 53.712 | 44.725 | 54.625 | 1.00 | 0.00 | O   |
| ATOM   | 3977 | N   | THR B 803 | 52.589 | 41.790 | 58.075 | 1.00 | 0.00 | N   |
| ATOM   | 3978 | CA  | THR B 803 | 51.629 | 40.856 | 58.587 | 1.00 | 0.00 | C   |
| ATOM   | 3979 | C   | THR B 803 | 52.076 | 40.393 | 59.936 | 1.00 | 0.00 | C   |
| ATOM   | 3980 | O   | THR B 803 | 51.272 | 40.252 | 60.853 | 1.00 | 0.00 | O   |
| ATOM   | 3981 | CB  | THR B 803 | 51.443 | 39.635 | 57.727 | 1.00 | 0.00 | C   |
| ATOM   | 3982 | CG2 | THR B 803 | 51.062 | 40.080 | 56.307 | 1.00 | 0.00 | C   |
| ATOM   | 3983 | OG1 | THR B 803 | 52.636 | 38.863 | 57.694 | 1.00 | 0.00 | O   |
| ATOM   | 3984 | N   | LEU B 804 | 53.389 | 40.151 | 60.089 | 1.00 | 0.00 | N   |
| ATOM   | 3985 | CA  | LEU B 804 | 53.900 | 39.644 | 61.331 | 1.00 | 0.00 | C   |
| ATOM   | 3986 | C   | LEU B 804 | 53.625 | 40.670 | 62.385 | 1.00 | 0.00 | C   |
| ATOM   | 3987 | O   | LEU B 804 | 53.184 | 40.334 | 63.483 | 1.00 | 0.00 | O   |
| ATOM   | 3988 | CB  | LEU B 804 | 55.423 | 39.393 | 61.265 | 1.00 | 0.00 | C   |
| ATOM   | 3989 | CG  | LEU B 804 | 56.079 | 38.664 | 62.463 | 1.00 | 0.00 | C   |
| ATOM   | 3990 | CD1 | LEU B 804 | 57.591 | 38.501 | 62.222 | 1.00 | 0.00 | C   |
| ATOM   | 3991 | CD2 | LEU B 804 | 55.799 | 39.325 | 63.823 | 1.00 | 0.00 | C   |
| ATOM   | 3992 | N   | GLY B 805 | 53.871 | 41.956 | 62.075 | 1.00 | 0.00 | N   |
| ATOM   | 3993 | CA  | GLY B 805 | 53.692 | 42.988 | 63.054 | 1.00 | 0.00 | C   |
| ATOM   | 3994 | C   | GLY B 805 | 52.252 | 43.072 | 63.451 | 1.00 | 0.00 | C   |
| ATOM   | 3995 | O   | GLY B 805 | 51.933 | 43.234 | 64.629 | 1.00 | 0.00 | O   |
| ATOM   | 3996 | N   | LEU B 806 | 51.340 | 42.978 | 62.467 | 1.00 | 0.00 | N   |
| ATOM   | 3997 | CA  | LEU B 806 | 49.933 | 43.102 | 62.727 | 1.00 | 0.00 | C   |

|      |      |     |           |        |        |        |      |      |   |
|------|------|-----|-----------|--------|--------|--------|------|------|---|
| ATOM | 3998 | C   | LEU B 806 | 49.508 | 41.960 | 63.589 | 1.00 | 0.00 | C |
| ATOM | 3999 | O   | LEU B 806 | 48.709 | 42.128 | 64.507 | 1.00 | 0.00 | O |
| ATOM | 4000 | CB  | LEU B 806 | 49.097 | 43.054 | 61.430 | 1.00 | 0.00 | C |
| ATOM | 4001 | CG  | LEU B 806 | 47.595 | 43.377 | 61.586 | 1.00 | 0.00 | C |
| ATOM | 4002 | CD1 | LEU B 806 | 46.836 | 42.325 | 62.413 | 1.00 | 0.00 | C |
| ATOM | 4003 | CD2 | LEU B 806 | 47.395 | 44.810 | 62.102 | 1.00 | 0.00 | C |
| ATOM | 4004 | N   | PHE B 807 | 50.041 | 40.760 | 63.304 | 1.00 | 0.00 | N |
| ATOM | 4005 | CA  | PHE B 807 | 49.666 | 39.580 | 64.028 | 1.00 | 0.00 | C |
| ATOM | 4006 | C   | PHE B 807 | 50.085 | 39.733 | 65.458 | 1.00 | 0.00 | C |
| ATOM | 4007 | O   | PHE B 807 | 49.325 | 39.418 | 66.372 | 1.00 | 0.00 | O |
| ATOM | 4008 | CB  | PHE B 807 | 50.342 | 38.313 | 63.483 | 1.00 | 0.00 | C |
| ATOM | 4009 | CG  | PHE B 807 | 49.875 | 37.165 | 64.309 | 1.00 | 0.00 | C |
| ATOM | 4010 | CD1 | PHE B 807 | 48.647 | 36.592 | 64.069 | 1.00 | 0.00 | C |
| ATOM | 4011 | CD2 | PHE B 807 | 50.663 | 36.662 | 65.316 | 1.00 | 0.00 | C |
| ATOM | 4012 | CE1 | PHE B 807 | 48.212 | 35.532 | 64.830 | 1.00 | 0.00 | C |
| ATOM | 4013 | CE2 | PHE B 807 | 50.233 | 35.603 | 66.079 | 1.00 | 0.00 | C |
| ATOM | 4014 | CZ  | PHE B 807 | 49.006 | 35.038 | 65.837 | 1.00 | 0.00 | C |
| ATOM | 4015 | N   | TYR B 808 | 51.312 | 40.235 | 65.680 | 1.00 | 0.00 | N |
| ATOM | 4016 | CA  | TYR B 808 | 51.847 | 40.369 | 67.003 | 1.00 | 0.00 | C |
| ATOM | 4017 | C   | TYR B 808 | 50.994 | 41.341 | 67.756 | 1.00 | 0.00 | C |
| ATOM | 4018 | O   | TYR B 808 | 50.720 | 41.158 | 68.940 | 1.00 | 0.00 | O |
| ATOM | 4019 | CB  | TYR B 808 | 53.304 | 40.868 | 66.997 | 1.00 | 0.00 | C |
| ATOM | 4020 | CG  | TYR B 808 | 53.821 | 40.832 | 68.397 | 1.00 | 0.00 | C |
| ATOM | 4021 | CD1 | TYR B 808 | 54.049 | 39.628 | 69.021 | 1.00 | 0.00 | C |
| ATOM | 4022 | CD2 | TYR B 808 | 54.108 | 41.995 | 69.071 | 1.00 | 0.00 | C |
| ATOM | 4023 | CE1 | TYR B 808 | 54.530 | 39.580 | 70.308 | 1.00 | 0.00 | C |
| ATOM | 4024 | CE2 | TYR B 808 | 54.590 | 41.956 | 70.358 | 1.00 | 0.00 | C |
| ATOM | 4025 | CZ  | TYR B 808 | 54.801 | 40.747 | 70.979 | 1.00 | 0.00 | C |
| ATOM | 4026 | OH  | TYR B 808 | 55.295 | 40.709 | 72.299 | 1.00 | 0.00 | O |
| ATOM | 4027 | N   | PHE B 809 | 50.552 | 42.411 | 67.073 | 1.00 | 0.00 | N |
| ATOM | 4028 | CA  | PHE B 809 | 49.729 | 43.422 | 67.672 | 1.00 | 0.00 | C |
| ATOM | 4029 | C   | PHE B 809 | 48.441 | 42.785 | 68.086 | 1.00 | 0.00 | C |
| ATOM | 4030 | O   | PHE B 809 | 47.911 | 43.068 | 69.162 | 1.00 | 0.00 | O |
| ATOM | 4031 | CB  | PHE B 809 | 49.408 | 44.550 | 66.677 | 1.00 | 0.00 | C |
| ATOM | 4032 | CG  | PHE B 809 | 48.602 | 45.589 | 67.371 | 1.00 | 0.00 | C |
| ATOM | 4033 | CD1 | PHE B 809 | 49.222 | 46.539 | 68.143 | 1.00 | 0.00 | C |
| ATOM | 4034 | CD2 | PHE B 809 | 47.235 | 45.623 | 67.240 | 1.00 | 0.00 | C |
| ATOM | 4035 | CE1 | PHE B 809 | 48.486 | 47.507 | 68.782 | 1.00 | 0.00 | C |
| ATOM | 4036 | CE2 | PHE B 809 | 46.493 | 46.590 | 67.877 | 1.00 | 0.00 | C |
| ATOM | 4037 | CZ  | PHE B 809 | 47.119 | 47.535 | 68.654 | 1.00 | 0.00 | C |
| ATOM | 4038 | N   | ILE B 810 | 47.907 | 41.889 | 67.238 | 1.00 | 0.00 | N |
| ATOM | 4039 | CA  | ILE B 810 | 46.664 | 41.230 | 67.516 | 1.00 | 0.00 | C |
| ATOM | 4040 | C   | ILE B 810 | 46.854 | 40.461 | 68.779 | 1.00 | 0.00 | C |
| ATOM | 4041 | O   | ILE B 810 | 45.996 | 40.469 | 69.661 | 1.00 | 0.00 | O |

|      |      |     |           |        |        |        |      |      |   |
|------|------|-----|-----------|--------|--------|--------|------|------|---|
| ATOM | 4042 | CB  | ILE B 810 | 46.307 | 40.212 | 66.467 | 1.00 | 0.00 | C |
| ATOM | 4043 | CG1 | ILE B 810 | 46.195 | 40.844 | 65.071 | 1.00 | 0.00 | C |
| ATOM | 4044 | CG2 | ILE B 810 | 45.026 | 39.503 | 66.936 | 1.00 | 0.00 | C |
| ATOM | 4045 | CD1 | ILE B 810 | 45.061 | 41.854 | 64.922 | 1.00 | 0.00 | C |
| ATOM | 4046 | N   | ALA B 811 | 48.002 | 39.772 | 68.896 | 1.00 | 0.00 | N |
| ATOM | 4047 | CA  | ALA B 811 | 48.271 | 38.963 | 70.047 | 1.00 | 0.00 | C |
| ATOM | 4048 | C   | ALA B 811 | 48.290 | 39.852 | 71.246 | 1.00 | 0.00 | C |
| ATOM | 4049 | O   | ALA B 811 | 47.740 | 39.515 | 72.293 | 1.00 | 0.00 | O |
| ATOM | 4050 | CB  | ALA B 811 | 49.636 | 38.262 | 69.972 | 1.00 | 0.00 | C |
| ATOM | 4051 | N   | GLY B 812 | 48.903 | 41.040 | 71.124 | 1.00 | 0.00 | N |
| ATOM | 4052 | CA  | GLY B 812 | 48.998 | 41.913 | 72.255 | 1.00 | 0.00 | C |
| ATOM | 4053 | C   | GLY B 812 | 47.618 | 42.278 | 72.691 | 1.00 | 0.00 | C |
| ATOM | 4054 | O   | GLY B 812 | 47.350 | 42.387 | 73.887 | 1.00 | 0.00 | O |
| ATOM | 4055 | N   | ILE B 813 | 46.709 | 42.496 | 71.725 | 1.00 | 0.00 | N |
| ATOM | 4056 | CA  | ILE B 813 | 45.371 | 42.894 | 72.047 | 1.00 | 0.00 | C |
| ATOM | 4057 | C   | ILE B 813 | 44.701 | 41.801 | 72.817 | 1.00 | 0.00 | C |
| ATOM | 4058 | O   | ILE B 813 | 44.040 | 42.060 | 73.821 | 1.00 | 0.00 | O |
| ATOM | 4059 | CB  | ILE B 813 | 44.541 | 43.183 | 70.833 | 1.00 | 0.00 | C |
| ATOM | 4060 | CG1 | ILE B 813 | 45.157 | 44.343 | 70.031 | 1.00 | 0.00 | C |
| ATOM | 4061 | CG2 | ILE B 813 | 43.097 | 43.454 | 71.293 | 1.00 | 0.00 | C |
| ATOM | 4062 | CD1 | ILE B 813 | 44.543 | 44.519 | 68.644 | 1.00 | 0.00 | C |
| ATOM | 4063 | N   | VAL B 814 | 44.855 | 40.540 | 72.370 | 1.00 | 0.00 | N |
| ATOM | 4064 | CA  | VAL B 814 | 44.188 | 39.449 | 73.024 | 1.00 | 0.00 | C |
| ATOM | 4065 | C   | VAL B 814 | 44.724 | 39.292 | 74.416 | 1.00 | 0.00 | C |
| ATOM | 4066 | O   | VAL B 814 | 43.972 | 39.047 | 75.357 | 1.00 | 0.00 | O |
| ATOM | 4067 | CB  | VAL B 814 | 44.331 | 38.142 | 72.297 | 1.00 | 0.00 | C |
| ATOM | 4068 | CG1 | VAL B 814 | 45.768 | 37.618 | 72.433 | 1.00 | 0.00 | C |
| ATOM | 4069 | CG2 | VAL B 814 | 43.268 | 37.178 | 72.838 | 1.00 | 0.00 | C |
| ATOM | 4070 | N   | PHE B 815 | 46.050 | 39.445 | 74.572 | 1.00 | 0.00 | N |
| ATOM | 4071 | CA  | PHE B 815 | 46.756 | 39.297 | 75.816 | 1.00 | 0.00 | C |
| ATOM | 4072 | C   | PHE B 815 | 46.403 | 40.385 | 76.782 | 1.00 | 0.00 | C |
| ATOM | 4073 | O   | PHE B 815 | 46.481 | 40.174 | 77.990 | 1.00 | 0.00 | O |
| ATOM | 4074 | CB  | PHE B 815 | 48.291 | 39.295 | 75.673 | 1.00 | 0.00 | C |
| ATOM | 4075 | CG  | PHE B 815 | 48.720 | 37.950 | 75.199 | 1.00 | 0.00 | C |
| ATOM | 4076 | CD1 | PHE B 815 | 48.799 | 36.902 | 76.090 | 1.00 | 0.00 | C |
| ATOM | 4077 | CD2 | PHE B 815 | 49.068 | 37.728 | 73.887 | 1.00 | 0.00 | C |
| ATOM | 4078 | CE1 | PHE B 815 | 49.199 | 35.654 | 75.671 | 1.00 | 0.00 | C |
| ATOM | 4079 | CE2 | PHE B 815 | 49.468 | 36.484 | 73.460 | 1.00 | 0.00 | C |
| ATOM | 4080 | CZ  | PHE B 815 | 49.533 | 35.444 | 74.355 | 1.00 | 0.00 | C |
| ATOM | 4081 | N   | ARG B 816 | 46.042 | 41.586 | 76.300 | 1.00 | 0.00 | N |
| ATOM | 4082 | CA  | ARG B 816 | 45.839 | 42.661 | 77.233 | 1.00 | 0.00 | C |
| ATOM | 4083 | C   | ARG B 816 | 44.780 | 42.312 | 78.235 | 1.00 | 0.00 | C |
| ATOM | 4084 | O   | ARG B 816 | 44.950 | 42.565 | 79.424 | 1.00 | 0.00 | O |
| ATOM | 4085 | CB  | ARG B 816 | 45.407 | 43.994 | 76.601 | 1.00 | 0.00 | C |

|        |      |     |     |   |     |        |        |        |      |      |   |
|--------|------|-----|-----|---|-----|--------|--------|--------|------|------|---|
| ATOM   | 4086 | CG  | ARG | B | 816 | 45.249 | 45.079 | 77.673 | 1.00 | 0.00 | C |
| ATOM   | 4087 | CD  | ARG | B | 816 | 44.669 | 46.403 | 77.173 | 1.00 | 0.00 | C |
| ATOM   | 4088 | NE  | ARG | B | 816 | 45.636 | 46.983 | 76.202 | 1.00 | 0.00 | N |
| ATOM   | 4089 | CZ  | ARG | B | 816 | 45.661 | 48.334 | 76.014 | 1.00 | 0.00 | C |
| ATOM   | 4090 | NH1 | ARG | B | 816 | 44.859 | 49.138 | 76.770 | 1.00 | 0.00 | N |
| ATOM   | 4091 | NH2 | ARG | B | 816 | 46.484 | 48.881 | 75.072 | 1.00 | 0.00 | N |
| ATOM   | 4092 | N   | LEU | B | 817 | 43.663 | 41.715 | 77.782 | 1.00 | 0.00 | N |
| ATOM   | 4093 | CA  | LEU | B | 817 | 42.552 | 41.387 | 78.635 | 1.00 | 0.00 | C |
| ATOM   | 4094 | C   | LEU | B | 817 | 42.987 | 40.348 | 79.628 | 1.00 | 0.00 | C |
| ATOM   | 4095 | O   | LEU | B | 817 | 42.563 | 40.371 | 80.785 | 1.00 | 0.00 | O |
| ATOM   | 4096 | CB  | LEU | B | 817 | 41.351 | 40.853 | 77.818 | 1.00 | 0.00 | C |
| ATOM   | 4097 | CG  | LEU | B | 817 | 40.014 | 40.637 | 78.567 | 1.00 | 0.00 | C |
| ATOM   | 4098 | CD1 | LEU | B | 817 | 38.926 | 40.169 | 77.587 | 1.00 | 0.00 | C |
| ATOM   | 4099 | CD2 | LEU | B | 817 | 40.126 | 39.670 | 79.757 | 1.00 | 0.00 | C |
| HETATM | 4100 | N   | HIE | B | 818 | 43.886 | 39.434 | 79.217 | 1.00 | 0.00 | N |
| HETATM | 4101 | CA  | HIE | B | 818 | 44.248 | 38.291 | 80.014 | 1.00 | 0.00 | C |
| HETATM | 4102 | C   | HIE | B | 818 | 44.747 | 38.697 | 81.371 | 1.00 | 0.00 | C |
| HETATM | 4103 | O   | HIE | B | 818 | 44.312 | 38.129 | 82.375 | 1.00 | 0.00 | O |
| HETATM | 4104 | CB  | HIE | B | 818 | 45.341 | 37.432 | 79.361 | 1.00 | 0.00 | C |
| HETATM | 4105 | CG  | HIE | B | 818 | 45.588 | 36.160 | 80.112 | 1.00 | 0.00 | C |
| HETATM | 4106 | CD2 | HIE | B | 818 | 46.500 | 35.879 | 81.083 | 1.00 | 0.00 | C |
| HETATM | 4107 | ND1 | HIE | B | 818 | 44.865 | 35.001 | 79.930 | 1.00 | 0.00 | N |
| HETATM | 4108 | CE1 | HIE | B | 818 | 45.371 | 34.085 | 80.792 | 1.00 | 0.00 | C |
| HETATM | 4109 | NE2 | HIE | B | 818 | 46.363 | 34.571 | 81.515 | 1.00 | 0.00 | N |
| ATOM   | 4110 | N   | SER | B | 819 | 45.623 | 39.718 | 81.456 | 1.00 | 0.00 | N |
| ATOM   | 4111 | CA  | SER | B | 819 | 46.149 | 40.154 | 82.721 | 1.00 | 0.00 | C |
| ATOM   | 4112 | C   | SER | B | 819 | 46.703 | 39.014 | 83.527 | 1.00 | 0.00 | C |
| ATOM   | 4113 | O   | SER | B | 819 | 45.995 | 38.408 | 84.329 | 1.00 | 0.00 | O |
| ATOM   | 4114 | CB  | SER | B | 819 | 45.096 | 40.880 | 83.571 | 1.00 | 0.00 | C |
| ATOM   | 4115 | OG  | SER | B | 819 | 45.661 | 41.290 | 84.805 | 1.00 | 0.00 | O |
| ATOM   | 4116 | N   | SER | B | 820 | 47.988 | 38.662 | 83.295 | 1.00 | 0.00 | N |
| ATOM   | 4117 | CA  | SER | B | 820 | 48.598 | 37.603 | 84.052 | 1.00 | 0.00 | C |
| ATOM   | 4118 | C   | SER | B | 820 | 50.055 | 37.918 | 84.225 | 1.00 | 0.00 | C |
| ATOM   | 4119 | O   | SER | B | 820 | 50.543 | 38.943 | 83.758 | 1.00 | 0.00 | O |
| ATOM   | 4120 | CB  | SER | B | 820 | 48.484 | 36.236 | 83.353 | 1.00 | 0.00 | C |
| ATOM   | 4121 | OG  | SER | B | 820 | 49.052 | 35.209 | 84.154 | 1.00 | 0.00 | O |
| ATOM   | 4122 | N   | ASN | B | 821 | 50.785 | 37.054 | 84.964 | 1.00 | 0.00 | N |
| ATOM   | 4123 | CA  | ASN | B | 821 | 52.193 | 37.256 | 85.132 | 1.00 | 0.00 | C |
| ATOM   | 4124 | C   | ASN | B | 821 | 52.877 | 36.732 | 83.915 | 1.00 | 0.00 | C |
| ATOM   | 4125 | O   | ASN | B | 821 | 52.352 | 35.874 | 83.207 | 1.00 | 0.00 | O |
| ATOM   | 4126 | CB  | ASN | B | 821 | 52.796 | 36.553 | 86.358 | 1.00 | 0.00 | C |
| ATOM   | 4127 | CG  | ASN | B | 821 | 52.442 | 37.388 | 87.578 | 1.00 | 0.00 | C |
| ATOM   | 4128 | ND2 | ASN | B | 821 | 51.952 | 36.718 | 88.656 | 1.00 | 0.00 | N |
| ATOM   | 4129 | OD1 | ASN | B | 821 | 52.600 | 38.607 | 87.575 | 1.00 | 0.00 | O |

|      |      |     |           |        |        |        |      |      |     |
|------|------|-----|-----------|--------|--------|--------|------|------|-----|
| ATOM | 4130 | N   | LYS B 822 | 54.071 | 37.285 | 83.631 | 1.00 | 0.00 | N   |
| ATOM | 4131 | CA  | LYS B 822 | 54.873 | 36.921 | 82.494 | 1.00 | 0.00 | C   |
| ATOM | 4132 | C   | LYS B 822 | 54.202 | 37.442 | 81.260 | 1.00 | 0.00 | C   |
| ATOM | 4133 | O   | LYS B 822 | 54.716 | 37.310 | 80.151 | 1.00 | 0.00 | O   |
| ATOM | 4134 | CB  | LYS B 822 | 55.052 | 35.400 | 82.374 | 1.00 | 0.00 | C   |
| ATOM | 4135 | CG  | LYS B 822 | 55.805 | 34.810 | 83.568 | 1.00 | 0.00 | C   |
| ATOM | 4136 | CD  | LYS B 822 | 55.705 | 33.290 | 83.691 | 1.00 | 0.00 | C   |
| ATOM | 4137 | CE  | LYS B 822 | 56.297 | 32.750 | 84.995 | 1.00 | 0.00 | C   |
| ATOM | 4138 | NZ  | LYS B 822 | 55.445 | 33.148 | 86.137 | 1.00 | 0.00 | N1+ |
| ATOM | 4139 | N   | SER B 823 | 53.031 | 38.078 | 81.448 | 1.00 | 0.00 | N   |
| ATOM | 4140 | CA  | SER B 823 | 52.305 | 38.746 | 80.412 | 1.00 | 0.00 | C   |
| ATOM | 4141 | C   | SER B 823 | 51.233 | 39.472 | 81.155 | 1.00 | 0.00 | C   |
| ATOM | 4142 | O   | SER B 823 | 50.110 | 38.985 | 81.263 | 1.00 | 0.00 | O   |
| ATOM | 4143 | CB  | SER B 823 | 51.615 | 37.787 | 79.428 | 1.00 | 0.00 | C   |
| ATOM | 4144 | OG  | SER B 823 | 50.916 | 38.526 | 78.438 | 1.00 | 0.00 | O   |
| ATOM | 4145 | N   | SER B 824 | 51.572 | 40.660 | 81.688 | 1.00 | 0.00 | N   |
| ATOM | 4146 | CA  | SER B 824 | 50.659 | 41.418 | 82.493 | 1.00 | 0.00 | C   |
| ATOM | 4147 | C   | SER B 824 | 50.186 | 42.573 | 81.696 | 1.00 | 0.00 | C   |
| ATOM | 4148 | O   | SER B 824 | 50.361 | 42.634 | 80.479 | 1.00 | 0.00 | O   |
| ATOM | 4149 | CB  | SER B 824 | 51.305 | 42.037 | 83.746 | 1.00 | 0.00 | C   |
| ATOM | 4150 | OG  | SER B 824 | 51.792 | 41.028 | 84.618 | 1.00 | 0.00 | O   |
| ATOM | 4151 | N   | LEU B 825 | 49.552 | 43.535 | 82.390 | 1.00 | 0.00 | N   |
| ATOM | 4152 | CA  | LEU B 825 | 49.158 | 44.714 | 81.699 | 1.00 | 0.00 | C   |
| ATOM | 4153 | C   | LEU B 825 | 50.425 | 45.325 | 81.219 | 1.00 | 0.00 | C   |
| ATOM | 4154 | O   | LEU B 825 | 50.481 | 45.900 | 80.134 | 1.00 | 0.00 | O   |
| ATOM | 4155 | CB  | LEU B 825 | 48.427 | 45.769 | 82.541 | 1.00 | 0.00 | C   |
| ATOM | 4156 | CG  | LEU B 825 | 48.245 | 47.069 | 81.735 | 1.00 | 0.00 | C   |
| ATOM | 4157 | CD1 | LEU B 825 | 47.540 | 46.803 | 80.400 | 1.00 | 0.00 | C   |
| ATOM | 4158 | CD2 | LEU B 825 | 47.546 | 48.161 | 82.547 | 1.00 | 0.00 | C   |
| ATOM | 4159 | N   | TYR B 826 | 51.485 | 45.204 | 82.033 | 1.00 | 0.00 | N   |
| ATOM | 4160 | CA  | TYR B 826 | 52.744 | 45.753 | 81.645 | 1.00 | 0.00 | C   |
| ATOM | 4161 | C   | TYR B 826 | 53.170 | 45.036 | 80.404 | 1.00 | 0.00 | C   |
| ATOM | 4162 | O   | TYR B 826 | 53.651 | 45.654 | 79.457 | 1.00 | 0.00 | O   |
| ATOM | 4163 | CB  | TYR B 826 | 53.841 | 45.564 | 82.701 | 1.00 | 0.00 | C   |
| ATOM | 4164 | CG  | TYR B 826 | 55.036 | 46.294 | 82.192 | 1.00 | 0.00 | C   |
| ATOM | 4165 | CD1 | TYR B 826 | 55.135 | 47.654 | 82.370 | 1.00 | 0.00 | C   |
| ATOM | 4166 | CD2 | TYR B 826 | 56.048 | 45.627 | 81.541 | 1.00 | 0.00 | C   |
| ATOM | 4167 | CE1 | TYR B 826 | 56.230 | 48.344 | 81.907 | 1.00 | 0.00 | C   |
| ATOM | 4168 | CE2 | TYR B 826 | 57.145 | 46.311 | 81.075 | 1.00 | 0.00 | C   |
| ATOM | 4169 | CZ  | TYR B 826 | 57.236 | 47.670 | 81.258 | 1.00 | 0.00 | C   |
| ATOM | 4170 | OH  | TYR B 826 | 58.358 | 48.379 | 80.777 | 1.00 | 0.00 | O   |
| ATOM | 4171 | N   | SER B 827 | 52.988 | 43.703 | 80.376 | 1.00 | 0.00 | N   |
| ATOM | 4172 | CA  | SER B 827 | 53.397 | 42.940 | 79.232 | 1.00 | 0.00 | C   |
| ATOM | 4173 | C   | SER B 827 | 52.606 | 43.399 | 78.053 | 1.00 | 0.00 | C   |

|      |      |     |           |        |        |        |      |      |   |
|------|------|-----|-----------|--------|--------|--------|------|------|---|
| ATOM | 4174 | O   | SER B 827 | 53.139 | 43.546 | 76.954 | 1.00 | 0.00 | O |
| ATOM | 4175 | CB  | SER B 827 | 53.146 | 41.432 | 79.391 | 1.00 | 0.00 | C |
| ATOM | 4176 | OG  | SER B 827 | 53.573 | 40.744 | 78.223 | 1.00 | 0.00 | O |
| ATOM | 4177 | N   | GLY B 828 | 51.300 | 43.654 | 78.253 | 1.00 | 0.00 | N |
| ATOM | 4178 | CA  | GLY B 828 | 50.468 | 44.063 | 77.162 | 1.00 | 0.00 | C |
| ATOM | 4179 | C   | GLY B 828 | 50.987 | 45.361 | 76.646 | 1.00 | 0.00 | C |
| ATOM | 4180 | O   | GLY B 828 | 51.029 | 45.588 | 75.439 | 1.00 | 0.00 | O |
| ATOM | 4181 | N   | ARG B 829 | 51.388 | 46.259 | 77.561 | 1.00 | 0.00 | N |
| ATOM | 4182 | CA  | ARG B 829 | 51.881 | 47.534 | 77.129 | 1.00 | 0.00 | C |
| ATOM | 4183 | C   | ARG B 829 | 53.139 | 47.329 | 76.356 | 1.00 | 0.00 | C |
| ATOM | 4184 | O   | ARG B 829 | 53.388 | 48.022 | 75.375 | 1.00 | 0.00 | O |
| ATOM | 4185 | CB  | ARG B 829 | 52.174 | 48.520 | 78.271 | 1.00 | 0.00 | C |
| ATOM | 4186 | CG  | ARG B 829 | 50.905 | 49.186 | 78.806 | 1.00 | 0.00 | C |
| ATOM | 4187 | CD  | ARG B 829 | 51.171 | 50.483 | 79.571 | 1.00 | 0.00 | C |
| ATOM | 4188 | NE  | ARG B 829 | 51.808 | 50.127 | 80.867 | 1.00 | 0.00 | N |
| ATOM | 4189 | CZ  | ARG B 829 | 51.036 | 50.013 | 81.988 | 1.00 | 0.00 | C |
| ATOM | 4190 | NH1 | ARG B 829 | 49.695 | 50.255 | 81.920 | 1.00 | 0.00 | N |
| ATOM | 4191 | NH2 | ARG B 829 | 51.609 | 49.658 | 83.173 | 1.00 | 0.00 | N |
| ATOM | 4192 | N   | VAL B 830 | 53.969 | 46.358 | 76.778 | 1.00 | 0.00 | N |
| ATOM | 4193 | CA  | VAL B 830 | 55.228 | 46.144 | 76.122 | 1.00 | 0.00 | C |
| ATOM | 4194 | C   | VAL B 830 | 54.992 | 45.780 | 74.688 | 1.00 | 0.00 | C |
| ATOM | 4195 | O   | VAL B 830 | 55.628 | 46.319 | 73.786 | 1.00 | 0.00 | O |
| ATOM | 4196 | CB  | VAL B 830 | 56.012 | 45.022 | 76.737 | 1.00 | 0.00 | C |
| ATOM | 4197 | CG1 | VAL B 830 | 57.283 | 44.798 | 75.900 | 1.00 | 0.00 | C |
| ATOM | 4198 | CG2 | VAL B 830 | 56.285 | 45.366 | 78.212 | 1.00 | 0.00 | C |
| ATOM | 4199 | N   | ILE B 831 | 54.042 | 44.870 | 74.443 | 1.00 | 0.00 | N |
| ATOM | 4200 | CA  | ILE B 831 | 53.750 | 44.371 | 73.132 | 1.00 | 0.00 | C |
| ATOM | 4201 | C   | ILE B 831 | 53.282 | 45.508 | 72.291 | 1.00 | 0.00 | C |
| ATOM | 4202 | O   | ILE B 831 | 53.647 | 45.638 | 71.124 | 1.00 | 0.00 | O |
| ATOM | 4203 | CB  | ILE B 831 | 52.593 | 43.433 | 73.200 | 1.00 | 0.00 | C |
| ATOM | 4204 | CG1 | ILE B 831 | 52.906 | 42.289 | 74.167 | 1.00 | 0.00 | C |
| ATOM | 4205 | CG2 | ILE B 831 | 52.228 | 42.986 | 71.781 | 1.00 | 0.00 | C |
| ATOM | 4206 | CD1 | ILE B 831 | 51.643 | 41.609 | 74.677 | 1.00 | 0.00 | C |
| ATOM | 4207 | N   | PHE B 832 | 52.435 | 46.358 | 72.889 | 1.00 | 0.00 | N |
| ATOM | 4208 | CA  | PHE B 832 | 51.786 | 47.434 | 72.206 | 1.00 | 0.00 | C |
| ATOM | 4209 | C   | PHE B 832 | 52.848 | 48.374 | 71.715 | 1.00 | 0.00 | C |
| ATOM | 4210 | O   | PHE B 832 | 52.790 | 48.850 | 70.583 | 1.00 | 0.00 | O |
| ATOM | 4211 | CB  | PHE B 832 | 50.844 | 48.173 | 73.176 | 1.00 | 0.00 | C |
| ATOM | 4212 | CG  | PHE B 832 | 49.710 | 48.812 | 72.446 | 1.00 | 0.00 | C |
| ATOM | 4213 | CD1 | PHE B 832 | 48.650 | 48.042 | 72.025 | 1.00 | 0.00 | C |
| ATOM | 4214 | CD2 | PHE B 832 | 49.673 | 50.161 | 72.213 | 1.00 | 0.00 | C |
| ATOM | 4215 | CE1 | PHE B 832 | 47.588 | 48.608 | 71.365 | 1.00 | 0.00 | C |
| ATOM | 4216 | CE2 | PHE B 832 | 48.613 | 50.739 | 71.552 | 1.00 | 0.00 | C |
| ATOM | 4217 | CZ  | PHE B 832 | 47.566 | 49.961 | 71.122 | 1.00 | 0.00 | C |

|      |      |     |           |        |        |        |      |      |   |
|------|------|-----|-----------|--------|--------|--------|------|------|---|
| ATOM | 4218 | N   | CYS B 833 | 53.852 | 48.664 | 72.565 | 1.00 | 0.00 | N |
| ATOM | 4219 | CA  | CYS B 833 | 54.913 | 49.566 | 72.209 | 1.00 | 0.00 | C |
| ATOM | 4220 | C   | CYS B 833 | 55.702 | 49.001 | 71.072 | 1.00 | 0.00 | C |
| ATOM | 4221 | O   | CYS B 833 | 56.040 | 49.716 | 70.128 | 1.00 | 0.00 | O |
| ATOM | 4222 | CB  | CYS B 833 | 55.899 | 49.804 | 73.367 | 1.00 | 0.00 | C |
| ATOM | 4223 | SG  | CYS B 833 | 57.241 | 50.948 | 72.918 | 1.00 | 0.00 | S |
| ATOM | 4224 | N   | LEU B 834 | 56.005 | 47.690 | 71.125 | 1.00 | 0.00 | N |
| ATOM | 4225 | CA  | LEU B 834 | 56.816 | 47.065 | 70.117 | 1.00 | 0.00 | C |
| ATOM | 4226 | C   | LEU B 834 | 56.100 | 47.138 | 68.811 | 1.00 | 0.00 | C |
| ATOM | 4227 | O   | LEU B 834 | 56.709 | 47.398 | 67.776 | 1.00 | 0.00 | O |
| ATOM | 4228 | CB  | LEU B 834 | 57.096 | 45.580 | 70.415 | 1.00 | 0.00 | C |
| ATOM | 4229 | CG  | LEU B 834 | 57.933 | 45.369 | 71.689 | 1.00 | 0.00 | C |
| ATOM | 4230 | CD1 | LEU B 834 | 58.216 | 43.880 | 71.934 | 1.00 | 0.00 | C |
| ATOM | 4231 | CD2 | LEU B 834 | 59.209 | 46.227 | 71.668 | 1.00 | 0.00 | C |
| ATOM | 4232 | N   | ASP B 835 | 54.773 | 46.927 | 68.833 | 1.00 | 0.00 | N |
| ATOM | 4233 | CA  | ASP B 835 | 54.007 | 46.944 | 67.624 | 1.00 | 0.00 | C |
| ATOM | 4234 | C   | ASP B 835 | 54.145 | 48.309 | 67.040 | 1.00 | 0.00 | C |
| ATOM | 4235 | O   | ASP B 835 | 54.283 | 48.466 | 65.831 | 1.00 | 0.00 | O |
| ATOM | 4236 | CB  | ASP B 835 | 52.512 | 46.694 | 67.879 | 1.00 | 0.00 | C |
| ATOM | 4237 | CG  | ASP B 835 | 52.356 | 45.262 | 68.370 | 1.00 | 0.00 | C |
| ATOM | 4238 | OD1 | ASP B 835 | 53.157 | 44.395 | 67.932 | 1.00 | 0.00 | O |
| ATOM | 4239 | OD2 | ASP B 835 | 51.438 | 45.018 | 69.197 | 1.00 | 0.00 | O |
| ATOM | 4240 | N   | TYR B 836 | 54.159 | 49.331 | 67.908 | 1.00 | 0.00 | N |
| ATOM | 4241 | CA  | TYR B 836 | 54.258 | 50.695 | 67.479 | 1.00 | 0.00 | C |
| ATOM | 4242 | C   | TYR B 836 | 55.525 | 50.853 | 66.707 | 1.00 | 0.00 | C |
| ATOM | 4243 | O   | TYR B 836 | 55.542 | 51.491 | 65.656 | 1.00 | 0.00 | O |
| ATOM | 4244 | CB  | TYR B 836 | 54.320 | 51.673 | 68.667 | 1.00 | 0.00 | C |
| ATOM | 4245 | CG  | TYR B 836 | 54.728 | 53.019 | 68.167 | 1.00 | 0.00 | C |
| ATOM | 4246 | CD1 | TYR B 836 | 53.807 | 53.906 | 67.666 | 1.00 | 0.00 | C |
| ATOM | 4247 | CD2 | TYR B 836 | 56.052 | 53.388 | 68.211 | 1.00 | 0.00 | C |
| ATOM | 4248 | CE1 | TYR B 836 | 54.208 | 55.141 | 67.212 | 1.00 | 0.00 | C |
| ATOM | 4249 | CE2 | TYR B 836 | 56.459 | 54.622 | 67.758 | 1.00 | 0.00 | C |
| ATOM | 4250 | CZ  | TYR B 836 | 55.531 | 55.502 | 67.256 | 1.00 | 0.00 | C |
| ATOM | 4251 | OH  | TYR B 836 | 55.939 | 56.771 | 66.792 | 1.00 | 0.00 | O |
| ATOM | 4252 | N   | ILE B 837 | 56.624 | 50.262 | 67.205 | 1.00 | 0.00 | N |
| ATOM | 4253 | CA  | ILE B 837 | 57.896 | 50.427 | 66.568 | 1.00 | 0.00 | C |
| ATOM | 4254 | C   | ILE B 837 | 57.843 | 49.851 | 65.187 | 1.00 | 0.00 | C |
| ATOM | 4255 | O   | ILE B 837 | 58.292 | 50.480 | 64.233 | 1.00 | 0.00 | O |
| ATOM | 4256 | CB  | ILE B 837 | 59.003 | 49.727 | 67.297 | 1.00 | 0.00 | C |
| ATOM | 4257 | CG1 | ILE B 837 | 59.144 | 50.283 | 68.723 | 1.00 | 0.00 | C |
| ATOM | 4258 | CG2 | ILE B 837 | 60.279 | 49.874 | 66.453 | 1.00 | 0.00 | C |
| ATOM | 4259 | CD1 | ILE B 837 | 60.039 | 49.429 | 69.620 | 1.00 | 0.00 | C |
| ATOM | 4260 | N   | ILE B 838 | 57.275 | 48.640 | 65.041 | 1.00 | 0.00 | N |
| ATOM | 4261 | CA  | ILE B 838 | 57.263 | 47.996 | 63.758 | 1.00 | 0.00 | C |

|      |      |     |           |        |        |        |      |      |   |
|------|------|-----|-----------|--------|--------|--------|------|------|---|
| ATOM | 4262 | C   | ILE B 838 | 56.443 | 48.791 | 62.795 | 1.00 | 0.00 | C |
| ATOM | 4263 | O   | ILE B 838 | 56.810 | 48.914 | 61.628 | 1.00 | 0.00 | O |
| ATOM | 4264 | CB  | ILE B 838 | 56.742 | 46.586 | 63.775 | 1.00 | 0.00 | C |
| ATOM | 4265 | CG1 | ILE B 838 | 57.121 | 45.875 | 62.465 | 1.00 | 0.00 | C |
| ATOM | 4266 | CG2 | ILE B 838 | 55.225 | 46.630 | 64.026 | 1.00 | 0.00 | C |
| ATOM | 4267 | CD1 | ILE B 838 | 58.628 | 45.669 | 62.299 | 1.00 | 0.00 | C |
| ATOM | 4268 | N   | PHE B 839 | 55.305 | 49.351 | 63.249 | 1.00 | 0.00 | N |
| ATOM | 4269 | CA  | PHE B 839 | 54.472 | 50.087 | 62.345 | 1.00 | 0.00 | C |
| ATOM | 4270 | C   | PHE B 839 | 55.260 | 51.234 | 61.817 | 1.00 | 0.00 | C |
| ATOM | 4271 | O   | PHE B 839 | 55.218 | 51.536 | 60.627 | 1.00 | 0.00 | O |
| ATOM | 4272 | CB  | PHE B 839 | 53.177 | 50.642 | 62.971 | 1.00 | 0.00 | C |
| ATOM | 4273 | CG  | PHE B 839 | 52.272 | 49.486 | 63.239 | 1.00 | 0.00 | C |
| ATOM | 4274 | CD1 | PHE B 839 | 51.700 | 48.792 | 62.195 | 1.00 | 0.00 | C |
| ATOM | 4275 | CD2 | PHE B 839 | 51.969 | 49.112 | 64.523 | 1.00 | 0.00 | C |
| ATOM | 4276 | CE1 | PHE B 839 | 50.863 | 47.727 | 62.431 | 1.00 | 0.00 | C |
| ATOM | 4277 | CE2 | PHE B 839 | 51.133 | 48.046 | 64.771 | 1.00 | 0.00 | C |
| ATOM | 4278 | CZ  | PHE B 839 | 50.580 | 47.351 | 63.721 | 1.00 | 0.00 | C |
| ATOM | 4279 | N   | THR B 840 | 56.030 | 51.891 | 62.695 | 1.00 | 0.00 | N |
| ATOM | 4280 | CA  | THR B 840 | 56.795 | 53.037 | 62.315 | 1.00 | 0.00 | C |
| ATOM | 4281 | C   | THR B 840 | 57.770 | 52.594 | 61.268 | 1.00 | 0.00 | C |
| ATOM | 4282 | O   | THR B 840 | 58.007 | 53.295 | 60.287 | 1.00 | 0.00 | O |
| ATOM | 4283 | CB  | THR B 840 | 57.581 | 53.559 | 63.477 | 1.00 | 0.00 | C |
| ATOM | 4284 | CG2 | THR B 840 | 58.174 | 54.918 | 63.093 | 1.00 | 0.00 | C |
| ATOM | 4285 | OG1 | THR B 840 | 56.715 | 53.740 | 64.585 | 1.00 | 0.00 | O |
| ATOM | 4286 | N   | LEU B 841 | 58.338 | 51.387 | 61.446 | 1.00 | 0.00 | N |
| ATOM | 4287 | CA  | LEU B 841 | 59.336 | 50.883 | 60.548 | 1.00 | 0.00 | C |
| ATOM | 4288 | C   | LEU B 841 | 58.719 | 50.777 | 59.192 | 1.00 | 0.00 | C |
| ATOM | 4289 | O   | LEU B 841 | 59.353 | 51.076 | 58.182 | 1.00 | 0.00 | O |
| ATOM | 4290 | CB  | LEU B 841 | 59.843 | 49.489 | 60.947 | 1.00 | 0.00 | C |
| ATOM | 4291 | CG  | LEU B 841 | 60.916 | 48.935 | 59.992 | 1.00 | 0.00 | C |
| ATOM | 4292 | CD1 | LEU B 841 | 62.193 | 49.789 | 60.045 | 1.00 | 0.00 | C |
| ATOM | 4293 | CD2 | LEU B 841 | 61.186 | 47.447 | 60.256 | 1.00 | 0.00 | C |
| ATOM | 4294 | N   | ARG B 842 | 57.450 | 50.350 | 59.147 | 1.00 | 0.00 | N |
| ATOM | 4295 | CA  | ARG B 842 | 56.709 | 50.190 | 57.931 | 1.00 | 0.00 | C |
| ATOM | 4296 | C   | ARG B 842 | 56.649 | 51.524 | 57.255 | 1.00 | 0.00 | C |
| ATOM | 4297 | O   | ARG B 842 | 56.877 | 51.636 | 56.050 | 1.00 | 0.00 | O |
| ATOM | 4298 | CB  | ARG B 842 | 55.283 | 49.739 | 58.282 | 1.00 | 0.00 | C |
| ATOM | 4299 | CG  | ARG B 842 | 54.248 | 49.695 | 57.163 | 1.00 | 0.00 | C |
| ATOM | 4300 | CD  | ARG B 842 | 52.907 | 49.227 | 57.735 | 1.00 | 0.00 | C |
| ATOM | 4301 | NE  | ARG B 842 | 51.850 | 49.365 | 56.701 | 1.00 | 0.00 | N |
| ATOM | 4302 | CZ  | ARG B 842 | 50.602 | 48.887 | 56.972 | 1.00 | 0.00 | C |
| ATOM | 4303 | NH1 | ARG B 842 | 50.366 | 48.221 | 58.143 | 1.00 | 0.00 | N |
| ATOM | 4304 | NH2 | ARG B 842 | 49.587 | 49.071 | 56.081 | 1.00 | 0.00 | N |
| ATOM | 4305 | N   | LEU B 843 | 56.365 | 52.590 | 58.026 | 1.00 | 0.00 | N |



|        |      |     |           |        |        |        |      |      |   |
|--------|------|-----|-----------|--------|--------|--------|------|------|---|
| ATOM   | 4306 | CA  | LEU B 843 | 56.277 | 53.894 | 57.442 | 1.00 | 0.00 | C |
| ATOM   | 4307 | C   | LEU B 843 | 57.603 | 54.269 | 56.882 | 1.00 | 0.00 | C |
| ATOM   | 4308 | O   | LEU B 843 | 57.686 | 54.824 | 55.790 | 1.00 | 0.00 | O |
| ATOM   | 4309 | CB  | LEU B 843 | 55.871 | 55.001 | 58.428 | 1.00 | 0.00 | C |
| ATOM   | 4310 | CG  | LEU B 843 | 54.375 | 54.991 | 58.793 | 1.00 | 0.00 | C |
| ATOM   | 4311 | CD1 | LEU B 843 | 53.968 | 53.681 | 59.474 | 1.00 | 0.00 | C |
| ATOM   | 4312 | CD2 | LEU B 843 | 53.994 | 56.237 | 59.607 | 1.00 | 0.00 | C |
| ATOM   | 4313 | N   | ILE B 844 | 58.688 | 53.941 | 57.603 | 1.00 | 0.00 | N |
| ATOM   | 4314 | CA  | ILE B 844 | 59.993 | 54.341 | 57.177 | 1.00 | 0.00 | C |
| ATOM   | 4315 | C   | ILE B 844 | 60.235 | 53.756 | 55.825 | 1.00 | 0.00 | C |
| ATOM   | 4316 | O   | ILE B 844 | 60.729 | 54.434 | 54.926 | 1.00 | 0.00 | O |
| ATOM   | 4317 | CB  | ILE B 844 | 61.057 | 53.820 | 58.094 | 1.00 | 0.00 | C |
| ATOM   | 4318 | CG1 | ILE B 844 | 60.844 | 54.390 | 59.504 | 1.00 | 0.00 | C |
| ATOM   | 4319 | CG2 | ILE B 844 | 62.424 | 54.151 | 57.474 | 1.00 | 0.00 | C |
| ATOM   | 4320 | CD1 | ILE B 844 | 61.595 | 53.633 | 60.594 | 1.00 | 0.00 | C |
| HETATM | 4321 | N   | HIE B 845 | 59.865 | 52.479 | 55.637 | 1.00 | 0.00 | N |
| HETATM | 4322 | CA  | HIE B 845 | 60.106 | 51.859 | 54.369 | 1.00 | 0.00 | C |
| HETATM | 4323 | C   | HIE B 845 | 59.323 | 52.587 | 53.323 | 1.00 | 0.00 | C |
| HETATM | 4324 | O   | HIE B 845 | 59.795 | 52.774 | 52.206 | 1.00 | 0.00 | O |
| HETATM | 4325 | CB  | HIE B 845 | 59.706 | 50.381 | 54.297 | 1.00 | 0.00 | C |
| HETATM | 4326 | CG  | HIE B 845 | 60.115 | 49.781 | 52.986 | 1.00 | 0.00 | C |
| HETATM | 4327 | CD2 | HIE B 845 | 59.376 | 49.520 | 51.871 | 1.00 | 0.00 | C |
| HETATM | 4328 | ND1 | HIE B 845 | 61.401 | 49.391 | 52.682 | 1.00 | 0.00 | N |
| HETATM | 4329 | CE1 | HIE B 845 | 61.380 | 48.918 | 51.414 | 1.00 | 0.00 | C |
| HETATM | 4330 | NE2 | HIE B 845 | 60.172 | 48.975 | 50.879 | 1.00 | 0.00 | N |
| ATOM   | 4331 | N   | ILE B 846 | 58.099 | 53.019 | 53.667 | 1.00 | 0.00 | N |
| ATOM   | 4332 | CA  | ILE B 846 | 57.261 | 53.684 | 52.714 | 1.00 | 0.00 | C |
| ATOM   | 4333 | C   | ILE B 846 | 57.960 | 54.931 | 52.271 | 1.00 | 0.00 | C |
| ATOM   | 4334 | O   | ILE B 846 | 57.989 | 55.244 | 51.082 | 1.00 | 0.00 | O |
| ATOM   | 4335 | CB  | ILE B 846 | 55.937 | 54.085 | 53.302 | 1.00 | 0.00 | C |
| ATOM   | 4336 | CG1 | ILE B 846 | 55.187 | 52.840 | 53.808 | 1.00 | 0.00 | C |
| ATOM   | 4337 | CG2 | ILE B 846 | 55.163 | 54.874 | 52.232 | 1.00 | 0.00 | C |
| ATOM   | 4338 | CD1 | ILE B 846 | 53.978 | 53.167 | 54.685 | 1.00 | 0.00 | C |
| ATOM   | 4339 | N   | PHE B 847 | 58.565 | 55.666 | 53.221 | 1.00 | 0.00 | N |
| ATOM   | 4340 | CA  | PHE B 847 | 59.218 | 56.898 | 52.883 | 1.00 | 0.00 | C |
| ATOM   | 4341 | C   | PHE B 847 | 60.354 | 56.587 | 51.956 | 1.00 | 0.00 | C |
| ATOM   | 4342 | O   | PHE B 847 | 60.566 | 57.283 | 50.963 | 1.00 | 0.00 | O |
| ATOM   | 4343 | CB  | PHE B 847 | 59.858 | 57.613 | 54.090 | 1.00 | 0.00 | C |
| ATOM   | 4344 | CG  | PHE B 847 | 58.817 | 57.912 | 55.116 | 1.00 | 0.00 | C |
| ATOM   | 4345 | CD1 | PHE B 847 | 57.848 | 58.868 | 54.897 | 1.00 | 0.00 | C |
| ATOM   | 4346 | CD2 | PHE B 847 | 58.834 | 57.252 | 56.323 | 1.00 | 0.00 | C |
| ATOM   | 4347 | CE1 | PHE B 847 | 56.904 | 59.131 | 55.858 | 1.00 | 0.00 | C |
| ATOM   | 4348 | CE2 | PHE B 847 | 57.892 | 57.512 | 57.289 | 1.00 | 0.00 | C |
| ATOM   | 4349 | CZ  | PHE B 847 | 56.918 | 58.456 | 57.057 | 1.00 | 0.00 | C |

|      |      |     |           |        |        |        |      |      |   |
|------|------|-----|-----------|--------|--------|--------|------|------|---|
| ATOM | 4350 | N   | THR B 848 | 61.103 | 55.513 | 52.260 | 1.00 | 0.00 | N |
| ATOM | 4351 | CA  | THR B 848 | 62.288 | 55.158 | 51.534 | 1.00 | 0.00 | C |
| ATOM | 4352 | C   | THR B 848 | 61.946 | 54.905 | 50.104 | 1.00 | 0.00 | C |
| ATOM | 4353 | O   | THR B 848 | 62.597 | 55.415 | 49.194 | 1.00 | 0.00 | O |
| ATOM | 4354 | CB  | THR B 848 | 62.876 | 53.875 | 52.034 | 1.00 | 0.00 | C |
| ATOM | 4355 | CG2 | THR B 848 | 64.211 | 53.636 | 51.314 | 1.00 | 0.00 | C |
| ATOM | 4356 | OG1 | THR B 848 | 63.090 | 53.954 | 53.434 | 1.00 | 0.00 | O |
| ATOM | 4357 | N   | VAL B 849 | 60.898 | 54.103 | 49.861 | 1.00 | 0.00 | N |
| ATOM | 4358 | CA  | VAL B 849 | 60.557 | 53.790 | 48.507 | 1.00 | 0.00 | C |
| ATOM | 4359 | C   | VAL B 849 | 60.142 | 55.046 | 47.822 | 1.00 | 0.00 | C |
| ATOM | 4360 | O   | VAL B 849 | 60.553 | 55.316 | 46.693 | 1.00 | 0.00 | O |
| ATOM | 4361 | CB  | VAL B 849 | 59.406 | 52.834 | 48.406 | 1.00 | 0.00 | C |
| ATOM | 4362 | CG1 | VAL B 849 | 59.045 | 52.662 | 46.921 | 1.00 | 0.00 | C |
| ATOM | 4363 | CG2 | VAL B 849 | 59.796 | 51.524 | 49.113 | 1.00 | 0.00 | C |
| ATOM | 4364 | N   | SER B 850 | 59.320 | 55.860 | 48.505 | 1.00 | 0.00 | N |
| ATOM | 4365 | CA  | SER B 850 | 58.786 | 57.055 | 47.922 | 1.00 | 0.00 | C |
| ATOM | 4366 | C   | SER B 850 | 59.910 | 57.975 | 47.575 | 1.00 | 0.00 | C |
| ATOM | 4367 | O   | SER B 850 | 59.913 | 58.582 | 46.504 | 1.00 | 0.00 | O |
| ATOM | 4368 | CB  | SER B 850 | 57.865 | 57.814 | 48.892 | 1.00 | 0.00 | C |
| ATOM | 4369 | OG  | SER B 850 | 56.753 | 57.006 | 49.246 | 1.00 | 0.00 | O |
| ATOM | 4370 | N   | ARG B 851 | 60.904 | 58.105 | 48.473 | 1.00 | 0.00 | N |
| ATOM | 4371 | CA  | ARG B 851 | 61.980 | 59.019 | 48.222 | 1.00 | 0.00 | C |
| ATOM | 4372 | C   | ARG B 851 | 62.754 | 58.592 | 47.017 | 1.00 | 0.00 | C |
| ATOM | 4373 | O   | ARG B 851 | 63.088 | 59.426 | 46.175 | 1.00 | 0.00 | O |
| ATOM | 4374 | CB  | ARG B 851 | 62.967 | 59.166 | 49.398 | 1.00 | 0.00 | C |
| ATOM | 4375 | CG  | ARG B 851 | 63.642 | 57.862 | 49.836 | 1.00 | 0.00 | C |
| ATOM | 4376 | CD  | ARG B 851 | 64.790 | 58.049 | 50.833 | 1.00 | 0.00 | C |
| ATOM | 4377 | NE  | ARG B 851 | 66.016 | 58.387 | 50.055 | 1.00 | 0.00 | N |
| ATOM | 4378 | CZ  | ARG B 851 | 66.898 | 57.401 | 49.716 | 1.00 | 0.00 | C |
| ATOM | 4379 | NH1 | ARG B 851 | 66.682 | 56.118 | 50.133 | 1.00 | 0.00 | N |
| ATOM | 4380 | NH2 | ARG B 851 | 68.001 | 57.696 | 48.968 | 1.00 | 0.00 | N |
| ATOM | 4381 | N   | ASN B 852 | 63.057 | 57.283 | 46.884 | 1.00 | 0.00 | N |
| ATOM | 4382 | CA  | ASN B 852 | 63.892 | 56.880 | 45.790 | 1.00 | 0.00 | C |
| ATOM | 4383 | C   | ASN B 852 | 63.091 | 56.079 | 44.803 | 1.00 | 0.00 | C |
| ATOM | 4384 | O   | ASN B 852 | 63.159 | 54.851 | 44.782 | 1.00 | 0.00 | O |
| ATOM | 4385 | CB  | ASN B 852 | 65.056 | 55.999 | 46.267 | 1.00 | 0.00 | C |
| ATOM | 4386 | CG  | ASN B 852 | 66.100 | 55.981 | 45.175 | 1.00 | 0.00 | C |
| ATOM | 4387 | ND2 | ASN B 852 | 67.311 | 55.462 | 45.519 | 1.00 | 0.00 | N |
| ATOM | 4388 | OD1 | ASN B 852 | 65.849 | 56.424 | 44.055 | 1.00 | 0.00 | O |
| ATOM | 4389 | N   | LEU B 853 | 62.284 | 56.781 | 43.986 | 1.00 | 0.00 | N |
| ATOM | 4390 | CA  | LEU B 853 | 61.459 | 56.262 | 42.927 | 1.00 | 0.00 | C |
| ATOM | 4391 | C   | LEU B 853 | 62.280 | 55.947 | 41.713 | 1.00 | 0.00 | C |
| ATOM | 4392 | O   | LEU B 853 | 61.959 | 55.029 | 40.964 | 1.00 | 0.00 | O |
| ATOM | 4393 | CB  | LEU B 853 | 60.353 | 57.281 | 42.553 | 1.00 | 0.00 | C |

|      |      |     |           |        |        |        |      |      |     |
|------|------|-----|-----------|--------|--------|--------|------|------|-----|
| ATOM | 4394 | CG  | LEU B 853 | 59.311 | 56.862 | 41.486 | 1.00 | 0.00 | C   |
| ATOM | 4395 | CD1 | LEU B 853 | 58.198 | 57.919 | 41.404 | 1.00 | 0.00 | C   |
| ATOM | 4396 | CD2 | LEU B 853 | 59.916 | 56.626 | 40.093 | 1.00 | 0.00 | C   |
| ATOM | 4397 | N   | GLY B 854 | 63.356 | 56.730 | 41.488 | 1.00 | 0.00 | N   |
| ATOM | 4398 | CA  | GLY B 854 | 64.155 | 56.721 | 40.286 | 1.00 | 0.00 | C   |
| ATOM | 4399 | C   | GLY B 854 | 64.604 | 55.353 | 39.885 | 1.00 | 0.00 | C   |
| ATOM | 4400 | O   | GLY B 854 | 64.350 | 54.353 | 40.549 | 1.00 | 0.00 | O   |
| ATOM | 4401 | N   | PRO B 855 | 65.433 | 55.348 | 38.844 | 1.00 | 0.00 | N   |
| ATOM | 4402 | CA  | PRO B 855 | 66.080 | 54.189 | 38.289 | 1.00 | 0.00 | C   |
| ATOM | 4403 | C   | PRO B 855 | 66.805 | 53.420 | 39.335 | 1.00 | 0.00 | C   |
| ATOM | 4404 | O   | PRO B 855 | 67.217 | 52.284 | 39.102 | 1.00 | 0.00 | O   |
| ATOM | 4405 | CB  | PRO B 855 | 66.912 | 54.693 | 37.116 | 1.00 | 0.00 | C   |
| ATOM | 4406 | CG  | PRO B 855 | 66.105 | 55.909 | 36.624 | 1.00 | 0.00 | C   |
| ATOM | 4407 | CD  | PRO B 855 | 65.396 | 56.438 | 37.884 | 1.00 | 0.00 | C   |
| ATOM | 4408 | N   | LYS B 856 | 66.934 | 54.048 | 40.497 | 1.00 | 0.00 | N   |
| ATOM | 4409 | CA  | LYS B 856 | 67.476 | 53.573 | 41.702 | 1.00 | 0.00 | C   |
| ATOM | 4410 | C   | LYS B 856 | 66.663 | 52.420 | 42.215 | 1.00 | 0.00 | C   |
| ATOM | 4411 | O   | LYS B 856 | 67.189 | 51.619 | 42.977 | 1.00 | 0.00 | O   |
| ATOM | 4412 | CB  | LYS B 856 | 67.500 | 54.654 | 42.781 | 1.00 | 0.00 | C   |
| ATOM | 4413 | CG  | LYS B 856 | 68.353 | 55.869 | 42.411 | 1.00 | 0.00 | C   |
| ATOM | 4414 | CD  | LYS B 856 | 67.726 | 56.781 | 41.353 | 1.00 | 0.00 | C   |
| ATOM | 4415 | CE  | LYS B 856 | 67.181 | 58.087 | 41.936 | 1.00 | 0.00 | C   |
| ATOM | 4416 | NZ  | LYS B 856 | 66.718 | 58.978 | 40.848 | 1.00 | 0.00 | NI+ |
| ATOM | 4417 | N   | ILE B 857 | 65.367 | 52.290 | 41.839 | 1.00 | 0.00 | N   |
| ATOM | 4418 | CA  | ILE B 857 | 64.580 | 51.230 | 42.420 | 1.00 | 0.00 | C   |
| ATOM | 4419 | C   | ILE B 857 | 65.208 | 49.908 | 42.164 | 1.00 | 0.00 | C   |
| ATOM | 4420 | O   | ILE B 857 | 65.273 | 49.069 | 43.063 | 1.00 | 0.00 | O   |
| ATOM | 4421 | CB  | ILE B 857 | 63.166 | 51.117 | 41.932 | 1.00 | 0.00 | C   |
| ATOM | 4422 | CG1 | ILE B 857 | 62.481 | 49.941 | 42.643 | 1.00 | 0.00 | C   |
| ATOM | 4423 | CG2 | ILE B 857 | 63.194 | 50.885 | 40.419 | 1.00 | 0.00 | C   |
| ATOM | 4424 | CD1 | ILE B 857 | 62.474 | 50.029 | 44.164 | 1.00 | 0.00 | C   |
| ATOM | 4425 | N   | ILE B 858 | 65.713 | 49.683 | 40.945 | 1.00 | 0.00 | N   |
| ATOM | 4426 | CA  | ILE B 858 | 66.260 | 48.402 | 40.629 | 1.00 | 0.00 | C   |
| ATOM | 4427 | C   | ILE B 858 | 67.383 | 48.124 | 41.583 | 1.00 | 0.00 | C   |
| ATOM | 4428 | O   | ILE B 858 | 67.492 | 47.030 | 42.133 | 1.00 | 0.00 | O   |
| ATOM | 4429 | CB  | ILE B 858 | 66.740 | 48.370 | 39.193 | 1.00 | 0.00 | C   |
| ATOM | 4430 | CG1 | ILE B 858 | 66.952 | 46.938 | 38.696 | 1.00 | 0.00 | C   |
| ATOM | 4431 | CG2 | ILE B 858 | 67.962 | 49.284 | 39.032 | 1.00 | 0.00 | C   |
| ATOM | 4432 | CD1 | ILE B 858 | 65.657 | 46.249 | 38.277 | 1.00 | 0.00 | C   |
| ATOM | 4433 | N   | MET B 859 | 68.237 | 49.135 | 41.827 | 1.00 | 0.00 | N   |
| ATOM | 4434 | CA  | MET B 859 | 69.371 | 49.003 | 42.691 | 1.00 | 0.00 | C   |
| ATOM | 4435 | C   | MET B 859 | 68.914 | 48.796 | 44.099 | 1.00 | 0.00 | C   |
| ATOM | 4436 | O   | MET B 859 | 69.498 | 48.008 | 44.843 | 1.00 | 0.00 | O   |
| ATOM | 4437 | CB  | MET B 859 | 70.268 | 50.253 | 42.660 | 1.00 | 0.00 | C   |

|      |      |     |           |        |        |        |      |      |   |
|------|------|-----|-----------|--------|--------|--------|------|------|---|
| ATOM | 4438 | CG  | MET B 859 | 71.599 | 50.092 | 43.399 | 1.00 | 0.00 | C |
| ATOM | 4439 | SD  | MET B 859 | 71.485 | 50.057 | 45.212 | 1.00 | 0.00 | S |
| ATOM | 4440 | CE  | MET B 859 | 71.205 | 51.843 | 45.352 | 1.00 | 0.00 | C |
| ATOM | 4441 | N   | LEU B 860 | 67.840 | 49.503 | 44.486 | 1.00 | 0.00 | N |
| ATOM | 4442 | CA  | LEU B 860 | 67.372 | 49.524 | 45.839 | 1.00 | 0.00 | C |
| ATOM | 4443 | C   | LEU B 860 | 66.958 | 48.150 | 46.275 | 1.00 | 0.00 | C |
| ATOM | 4444 | O   | LEU B 860 | 67.309 | 47.718 | 47.374 | 1.00 | 0.00 | O |
| ATOM | 4445 | CB  | LEU B 860 | 66.191 | 50.515 | 45.983 | 1.00 | 0.00 | C |
| ATOM | 4446 | CG  | LEU B 860 | 65.673 | 50.812 | 47.406 | 1.00 | 0.00 | C |
| ATOM | 4447 | CD1 | LEU B 860 | 64.568 | 51.879 | 47.350 | 1.00 | 0.00 | C |
| ATOM | 4448 | CD2 | LEU B 860 | 65.192 | 49.555 | 48.154 | 1.00 | 0.00 | C |
| ATOM | 4449 | N   | GLN B 861 | 66.212 | 47.408 | 45.438 | 1.00 | 0.00 | N |
| ATOM | 4450 | CA  | GLN B 861 | 65.721 | 46.137 | 45.897 | 1.00 | 0.00 | C |
| ATOM | 4451 | C   | GLN B 861 | 66.845 | 45.175 | 46.139 | 1.00 | 0.00 | C |
| ATOM | 4452 | O   | GLN B 861 | 66.858 | 44.478 | 47.153 | 1.00 | 0.00 | O |
| ATOM | 4453 | CB  | GLN B 861 | 64.741 | 45.460 | 44.927 | 1.00 | 0.00 | C |
| ATOM | 4454 | CG  | GLN B 861 | 64.197 | 44.146 | 45.498 | 1.00 | 0.00 | C |
| ATOM | 4455 | CD  | GLN B 861 | 63.233 | 43.533 | 44.497 | 1.00 | 0.00 | C |
| ATOM | 4456 | NE2 | GLN B 861 | 62.571 | 42.418 | 44.905 | 1.00 | 0.00 | N |
| ATOM | 4457 | OE1 | GLN B 861 | 63.072 | 44.026 | 43.382 | 1.00 | 0.00 | O |
| ATOM | 4458 | N   | ARG B 862 | 67.823 | 45.111 | 45.220 | 1.00 | 0.00 | N |
| ATOM | 4459 | CA  | ARG B 862 | 68.903 | 44.168 | 45.338 | 1.00 | 0.00 | C |
| ATOM | 4460 | C   | ARG B 862 | 69.695 | 44.492 | 46.563 | 1.00 | 0.00 | C |
| ATOM | 4461 | O   | ARG B 862 | 70.114 | 43.605 | 47.303 | 1.00 | 0.00 | O |
| ATOM | 4462 | CB  | ARG B 862 | 69.875 | 44.245 | 44.148 | 1.00 | 0.00 | C |
| ATOM | 4463 | CG  | ARG B 862 | 71.041 | 43.262 | 44.223 | 1.00 | 0.00 | C |
| ATOM | 4464 | CD  | ARG B 862 | 70.631 | 41.813 | 43.962 | 1.00 | 0.00 | C |
| ATOM | 4465 | NE  | ARG B 862 | 71.878 | 41.000 | 43.954 | 1.00 | 0.00 | N |
| ATOM | 4466 | CZ  | ARG B 862 | 72.371 | 40.499 | 45.124 | 1.00 | 0.00 | C |
| ATOM | 4467 | NH1 | ARG B 862 | 71.692 | 40.703 | 46.290 | 1.00 | 0.00 | N |
| ATOM | 4468 | NH2 | ARG B 862 | 73.540 | 39.794 | 45.126 | 1.00 | 0.00 | N |
| ATOM | 4469 | N   | MET B 863 | 69.907 | 45.791 | 46.813 | 1.00 | 0.00 | N |
| ATOM | 4470 | CA  | MET B 863 | 70.690 | 46.210 | 47.934 | 1.00 | 0.00 | C |
| ATOM | 4471 | C   | MET B 863 | 69.994 | 45.756 | 49.171 | 1.00 | 0.00 | C |
| ATOM | 4472 | O   | MET B 863 | 70.624 | 45.337 | 50.141 | 1.00 | 0.00 | O |
| ATOM | 4473 | CB  | MET B 863 | 70.838 | 47.741 | 47.981 | 1.00 | 0.00 | C |
| ATOM | 4474 | CG  | MET B 863 | 71.664 | 48.266 | 49.156 | 1.00 | 0.00 | C |
| ATOM | 4475 | SD  | MET B 863 | 70.789 | 48.273 | 50.746 | 1.00 | 0.00 | S |
| ATOM | 4476 | CE  | MET B 863 | 72.147 | 49.046 | 51.668 | 1.00 | 0.00 | C |
| ATOM | 4477 | N   | LEU B 864 | 68.654 | 45.813 | 49.163 | 1.00 | 0.00 | N |
| ATOM | 4478 | CA  | LEU B 864 | 67.902 | 45.450 | 50.322 | 1.00 | 0.00 | C |
| ATOM | 4479 | C   | LEU B 864 | 68.161 | 44.011 | 50.632 | 1.00 | 0.00 | C |
| ATOM | 4480 | O   | LEU B 864 | 68.410 | 43.649 | 51.780 | 1.00 | 0.00 | O |
| ATOM | 4481 | CB  | LEU B 864 | 66.387 | 45.533 | 50.088 | 1.00 | 0.00 | C |

|      |      |     |           |        |        |        |      |      |   |
|------|------|-----|-----------|--------|--------|--------|------|------|---|
| ATOM | 4482 | CG  | LEU B 864 | 65.561 | 45.270 | 51.358 | 1.00 | 0.00 | C |
| ATOM | 4483 | CD1 | LEU B 864 | 65.492 | 46.526 | 52.238 | 1.00 | 0.00 | C |
| ATOM | 4484 | CD2 | LEU B 864 | 64.199 | 44.645 | 51.031 | 1.00 | 0.00 | C |
| ATOM | 4485 | N   | ILE B 865 | 68.112 | 43.142 | 49.609 | 1.00 | 0.00 | N |
| ATOM | 4486 | CA  | ILE B 865 | 68.253 | 41.744 | 49.885 | 1.00 | 0.00 | C |
| ATOM | 4487 | C   | ILE B 865 | 69.623 | 41.447 | 50.405 | 1.00 | 0.00 | C |
| ATOM | 4488 | O   | ILE B 865 | 69.769 | 40.733 | 51.396 | 1.00 | 0.00 | O |
| ATOM | 4489 | CB  | ILE B 865 | 67.981 | 40.863 | 48.697 | 1.00 | 0.00 | C |
| ATOM | 4490 | CG1 | ILE B 865 | 67.854 | 39.402 | 49.151 | 1.00 | 0.00 | C |
| ATOM | 4491 | CG2 | ILE B 865 | 69.064 | 41.094 | 47.632 | 1.00 | 0.00 | C |
| ATOM | 4492 | CD1 | ILE B 865 | 67.269 | 38.482 | 48.080 | 1.00 | 0.00 | C |
| ATOM | 4493 | N   | ASP B 866 | 70.677 | 41.997 | 49.768 | 1.00 | 0.00 | N |
| ATOM | 4494 | CA  | ASP B 866 | 71.992 | 41.641 | 50.210 | 1.00 | 0.00 | C |
| ATOM | 4495 | C   | ASP B 866 | 72.255 | 42.150 | 51.597 | 1.00 | 0.00 | C |
| ATOM | 4496 | O   | ASP B 866 | 72.895 | 41.464 | 52.395 | 1.00 | 0.00 | O |
| ATOM | 4497 | CB  | ASP B 866 | 73.120 | 42.019 | 49.222 | 1.00 | 0.00 | C |
| ATOM | 4498 | CG  | ASP B 866 | 73.180 | 43.509 | 48.914 | 1.00 | 0.00 | C |
| ATOM | 4499 | OD1 | ASP B 866 | 72.932 | 44.340 | 49.824 | 1.00 | 0.00 | O |
| ATOM | 4500 | OD2 | ASP B 866 | 73.481 | 43.832 | 47.737 | 1.00 | 0.00 | O |
| ATOM | 4501 | N   | VAL B 867 | 71.758 | 43.354 | 51.938 | 1.00 | 0.00 | N |
| ATOM | 4502 | CA  | VAL B 867 | 72.021 | 43.890 | 53.243 | 1.00 | 0.00 | C |
| ATOM | 4503 | C   | VAL B 867 | 71.369 | 43.025 | 54.276 | 1.00 | 0.00 | C |
| ATOM | 4504 | O   | VAL B 867 | 71.960 | 42.737 | 55.310 | 1.00 | 0.00 | O |
| ATOM | 4505 | CB  | VAL B 867 | 71.526 | 45.292 | 53.426 | 1.00 | 0.00 | C |
| ATOM | 4506 | CG1 | VAL B 867 | 72.286 | 46.201 | 52.448 | 1.00 | 0.00 | C |
| ATOM | 4507 | CG2 | VAL B 867 | 69.998 | 45.318 | 53.262 | 1.00 | 0.00 | C |
| ATOM | 4508 | N   | PHE B 868 | 70.130 | 42.565 | 54.017 | 1.00 | 0.00 | N |
| ATOM | 4509 | CA  | PHE B 868 | 69.452 | 41.770 | 55.003 | 1.00 | 0.00 | C |
| ATOM | 4510 | C   | PHE B 868 | 70.239 | 40.535 | 55.271 | 1.00 | 0.00 | C |
| ATOM | 4511 | O   | PHE B 868 | 70.396 | 40.134 | 56.424 | 1.00 | 0.00 | O |
| ATOM | 4512 | CB  | PHE B 868 | 68.036 | 41.331 | 54.593 | 1.00 | 0.00 | C |
| ATOM | 4513 | CG  | PHE B 868 | 67.103 | 42.456 | 54.873 | 1.00 | 0.00 | C |
| ATOM | 4514 | CD1 | PHE B 868 | 66.652 | 42.660 | 56.157 | 1.00 | 0.00 | C |
| ATOM | 4515 | CD2 | PHE B 868 | 66.666 | 43.289 | 53.874 | 1.00 | 0.00 | C |
| ATOM | 4516 | CE1 | PHE B 868 | 65.787 | 43.687 | 56.450 | 1.00 | 0.00 | C |
| ATOM | 4517 | CE2 | PHE B 868 | 65.798 | 44.318 | 54.165 | 1.00 | 0.00 | C |
| ATOM | 4518 | CZ  | PHE B 868 | 65.357 | 44.521 | 55.450 | 1.00 | 0.00 | C |
| ATOM | 4519 | N   | PHE B 869 | 70.763 | 39.900 | 54.211 | 1.00 | 0.00 | N |
| ATOM | 4520 | CA  | PHE B 869 | 71.508 | 38.692 | 54.384 | 1.00 | 0.00 | C |
| ATOM | 4521 | C   | PHE B 869 | 72.678 | 39.013 | 55.270 | 1.00 | 0.00 | C |
| ATOM | 4522 | O   | PHE B 869 | 72.946 | 38.311 | 56.242 | 1.00 | 0.00 | O |
| ATOM | 4523 | CB  | PHE B 869 | 72.054 | 38.180 | 53.037 | 1.00 | 0.00 | C |
| ATOM | 4524 | CG  | PHE B 869 | 72.767 | 36.885 | 53.229 | 1.00 | 0.00 | C |
| ATOM | 4525 | CD1 | PHE B 869 | 72.066 | 35.700 | 53.234 | 1.00 | 0.00 | C |

|      |      |               |        |        |        |      |      |   |
|------|------|---------------|--------|--------|--------|------|------|---|
| ATOM | 4526 | CD2 PHE B 869 | 74.132 | 36.852 | 53.395 | 1.00 | 0.00 | C |
| ATOM | 4527 | CE1 PHE B 869 | 72.715 | 34.501 | 53.410 | 1.00 | 0.00 | C |
| ATOM | 4528 | CE2 PHE B 869 | 74.789 | 35.656 | 53.570 | 1.00 | 0.00 | C |
| ATOM | 4529 | CZ PHE B 869  | 74.079 | 34.478 | 53.579 | 1.00 | 0.00 | C |
| ATOM | 4530 | N PHE B 870   | 73.376 | 40.123 | 54.968 | 1.00 | 0.00 | N |
| ATOM | 4531 | CA PHE B 870  | 74.555 | 40.518 | 55.686 | 1.00 | 0.00 | C |
| ATOM | 4532 | C PHE B 870   | 74.276 | 40.766 | 57.131 | 1.00 | 0.00 | C |
| ATOM | 4533 | O PHE B 870   | 74.968 | 40.234 | 57.997 | 1.00 | 0.00 | O |
| ATOM | 4534 | CB PHE B 870  | 75.185 | 41.794 | 55.094 | 1.00 | 0.00 | C |
| ATOM | 4535 | CG PHE B 870  | 76.136 | 42.377 | 56.079 | 1.00 | 0.00 | C |
| ATOM | 4536 | CD1 PHE B 870 | 77.062 | 41.591 | 56.712 | 1.00 | 0.00 | C |
| ATOM | 4537 | CD2 PHE B 870 | 76.138 | 43.726 | 56.349 | 1.00 | 0.00 | C |
| ATOM | 4538 | CE1 PHE B 870 | 77.964 | 42.113 | 57.610 | 1.00 | 0.00 | C |
| ATOM | 4539 | CE2 PHE B 870 | 77.034 | 44.264 | 57.247 | 1.00 | 0.00 | C |
| ATOM | 4540 | CZ PHE B 870  | 77.947 | 43.459 | 57.879 | 1.00 | 0.00 | C |
| ATOM | 4541 | N LEU B 871   | 73.249 | 41.572 | 57.438 | 1.00 | 0.00 | N |
| ATOM | 4542 | CA LEU B 871  | 73.001 | 41.882 | 58.813 | 1.00 | 0.00 | C |
| ATOM | 4543 | C LEU B 871   | 72.641 | 40.633 | 59.544 | 1.00 | 0.00 | C |
| ATOM | 4544 | O LEU B 871   | 73.038 | 40.449 | 60.691 | 1.00 | 0.00 | O |
| ATOM | 4545 | CB LEU B 871  | 71.877 | 42.912 | 59.028 | 1.00 | 0.00 | C |
| ATOM | 4546 | CG LEU B 871  | 72.287 | 44.362 | 58.704 | 1.00 | 0.00 | C |
| ATOM | 4547 | CD1 LEU B 871 | 73.369 | 44.853 | 59.679 | 1.00 | 0.00 | C |
| ATOM | 4548 | CD2 LEU B 871 | 72.698 | 44.542 | 57.237 | 1.00 | 0.00 | C |
| ATOM | 4549 | N PHE B 872   | 71.891 | 39.725 | 58.894 | 1.00 | 0.00 | N |
| ATOM | 4550 | CA PHE B 872  | 71.455 | 38.548 | 59.584 | 1.00 | 0.00 | C |
| ATOM | 4551 | C PHE B 872   | 72.648 | 37.763 | 60.026 | 1.00 | 0.00 | C |
| ATOM | 4552 | O PHE B 872   | 72.728 | 37.354 | 61.183 | 1.00 | 0.00 | O |
| ATOM | 4553 | CB PHE B 872  | 70.582 | 37.625 | 58.714 | 1.00 | 0.00 | C |
| ATOM | 4554 | CG PHE B 872  | 70.101 | 36.527 | 59.599 | 1.00 | 0.00 | C |
| ATOM | 4555 | CD1 PHE B 872 | 69.026 | 36.729 | 60.433 | 1.00 | 0.00 | C |
| ATOM | 4556 | CD2 PHE B 872 | 70.718 | 35.294 | 59.596 | 1.00 | 0.00 | C |
| ATOM | 4557 | CE1 PHE B 872 | 68.572 | 35.724 | 61.255 | 1.00 | 0.00 | C |
| ATOM | 4558 | CE2 PHE B 872 | 70.266 | 34.289 | 60.415 | 1.00 | 0.00 | C |
| ATOM | 4559 | CZ PHE B 872  | 69.195 | 34.500 | 61.246 | 1.00 | 0.00 | C |
| ATOM | 4560 | N LEU B 873   | 73.620 | 37.540 | 59.126 | 1.00 | 0.00 | N |
| ATOM | 4561 | CA LEU B 873  | 74.763 | 36.755 | 59.492 | 1.00 | 0.00 | C |
| ATOM | 4562 | C LEU B 873   | 75.567 | 37.443 | 60.549 | 1.00 | 0.00 | C |
| ATOM | 4563 | O LEU B 873   | 76.084 | 36.801 | 61.461 | 1.00 | 0.00 | O |
| ATOM | 4564 | CB LEU B 873  | 75.701 | 36.436 | 58.321 | 1.00 | 0.00 | C |
| ATOM | 4565 | CG LEU B 873  | 75.151 | 35.344 | 57.385 | 1.00 | 0.00 | C |
| ATOM | 4566 | CD1 LEU B 873 | 73.838 | 35.767 | 56.712 | 1.00 | 0.00 | C |
| ATOM | 4567 | CD2 LEU B 873 | 76.224 | 34.898 | 56.387 | 1.00 | 0.00 | C |
| ATOM | 4568 | N PHE B 874   | 75.713 | 38.773 | 60.465 | 1.00 | 0.00 | N |
| ATOM | 4569 | CA PHE B 874  | 76.560 | 39.409 | 61.428 | 1.00 | 0.00 | C |

|      |      |     |           |        |        |        |      |      |   |
|------|------|-----|-----------|--------|--------|--------|------|------|---|
| ATOM | 4570 | C   | PHE B 874 | 75.969 | 39.209 | 62.787 | 1.00 | 0.00 | C |
| ATOM | 4571 | O   | PHE B 874 | 76.663 | 38.827 | 63.728 | 1.00 | 0.00 | O |
| ATOM | 4572 | CB  | PHE B 874 | 76.701 | 40.921 | 61.180 | 1.00 | 0.00 | C |
| ATOM | 4573 | CG  | PHE B 874 | 77.893 | 41.389 | 61.941 | 1.00 | 0.00 | C |
| ATOM | 4574 | CD1 | PHE B 874 | 79.149 | 41.267 | 61.386 | 1.00 | 0.00 | C |
| ATOM | 4575 | CD2 | PHE B 874 | 77.774 | 41.950 | 63.190 | 1.00 | 0.00 | C |
| ATOM | 4576 | CE1 | PHE B 874 | 80.266 | 41.692 | 62.066 | 1.00 | 0.00 | C |
| ATOM | 4577 | CE2 | PHE B 874 | 78.888 | 42.376 | 63.873 | 1.00 | 0.00 | C |
| ATOM | 4578 | CZ  | PHE B 874 | 80.135 | 42.248 | 63.316 | 1.00 | 0.00 | C |
| ATOM | 4579 | N   | ALA B 875 | 74.649 | 39.444 | 62.918 | 1.00 | 0.00 | N |
| ATOM | 4580 | CA  | ALA B 875 | 73.986 | 39.333 | 64.185 | 1.00 | 0.00 | C |
| ATOM | 4581 | C   | ALA B 875 | 74.063 | 37.920 | 64.670 | 1.00 | 0.00 | C |
| ATOM | 4582 | O   | ALA B 875 | 74.319 | 37.683 | 65.848 | 1.00 | 0.00 | O |
| ATOM | 4583 | CB  | ALA B 875 | 72.497 | 39.714 | 64.106 | 1.00 | 0.00 | C |
| ATOM | 4584 | N   | VAL B 876 | 73.854 | 36.942 | 63.768 | 1.00 | 0.00 | N |
| ATOM | 4585 | CA  | VAL B 876 | 73.850 | 35.573 | 64.194 | 1.00 | 0.00 | C |
| ATOM | 4586 | C   | VAL B 876 | 75.201 | 35.215 | 64.707 | 1.00 | 0.00 | C |
| ATOM | 4587 | O   | VAL B 876 | 75.324 | 34.502 | 65.704 | 1.00 | 0.00 | O |
| ATOM | 4588 | CB  | VAL B 876 | 73.452 | 34.601 | 63.116 | 1.00 | 0.00 | C |
| ATOM | 4589 | CG1 | VAL B 876 | 72.008 | 34.932 | 62.709 | 1.00 | 0.00 | C |
| ATOM | 4590 | CG2 | VAL B 876 | 74.461 | 34.652 | 61.958 | 1.00 | 0.00 | C |
| ATOM | 4591 | N   | TRP B 877 | 76.266 | 35.698 | 64.048 | 1.00 | 0.00 | N |
| ATOM | 4592 | CA  | TRP B 877 | 77.583 | 35.369 | 64.505 | 1.00 | 0.00 | C |
| ATOM | 4593 | C   | TRP B 877 | 77.763 | 35.920 | 65.886 | 1.00 | 0.00 | C |
| ATOM | 4594 | O   | TRP B 877 | 78.253 | 35.230 | 66.777 | 1.00 | 0.00 | O |
| ATOM | 4595 | CB  | TRP B 877 | 78.692 | 35.969 | 63.625 | 1.00 | 0.00 | C |
| ATOM | 4596 | CG  | TRP B 877 | 80.088 | 35.726 | 64.150 | 1.00 | 0.00 | C |
| ATOM | 4597 | CD1 | TRP B 877 | 80.921 | 34.662 | 63.969 | 1.00 | 0.00 | C |
| ATOM | 4598 | CD2 | TRP B 877 | 80.794 | 36.661 | 64.978 | 1.00 | 0.00 | C |
| ATOM | 4599 | CE2 | TRP B 877 | 82.040 | 36.102 | 65.262 | 1.00 | 0.00 | C |
| ATOM | 4600 | CE3 | TRP B 877 | 80.435 | 37.887 | 65.462 | 1.00 | 0.00 | C |
| ATOM | 4601 | NE1 | TRP B 877 | 82.104 | 34.875 | 64.637 | 1.00 | 0.00 | N |
| ATOM | 4602 | CZ2 | TRP B 877 | 82.949 | 36.764 | 66.040 | 1.00 | 0.00 | C |
| ATOM | 4603 | CZ3 | TRP B 877 | 81.352 | 38.551 | 66.244 | 1.00 | 0.00 | C |
| ATOM | 4604 | CH2 | TRP B 877 | 82.582 | 38.001 | 66.528 | 1.00 | 0.00 | C |
| ATOM | 4605 | N   | MET B 878 | 77.349 | 37.183 | 66.099 | 1.00 | 0.00 | N |
| ATOM | 4606 | CA  | MET B 878 | 77.564 | 37.828 | 67.361 | 1.00 | 0.00 | C |
| ATOM | 4607 | C   | MET B 878 | 76.840 | 37.093 | 68.442 | 1.00 | 0.00 | C |
| ATOM | 4608 | O   | MET B 878 | 77.395 | 36.847 | 69.512 | 1.00 | 0.00 | O |
| ATOM | 4609 | CB  | MET B 878 | 77.041 | 39.275 | 67.377 | 1.00 | 0.00 | C |
| ATOM | 4610 | CG  | MET B 878 | 77.744 | 40.191 | 66.374 | 1.00 | 0.00 | C |
| ATOM | 4611 | SD  | MET B 878 | 77.146 | 41.910 | 66.367 | 1.00 | 0.00 | S |
| ATOM | 4612 | CE  | MET B 878 | 75.527 | 41.507 | 65.645 | 1.00 | 0.00 | C |
| ATOM | 4613 | N   | VAL B 879 | 75.578 | 36.705 | 68.186 | 1.00 | 0.00 | N |

|      |      |     |           |        |        |        |      |      |   |
|------|------|-----|-----------|--------|--------|--------|------|------|---|
| ATOM | 4614 | CA  | VAL B 879 | 74.800 | 36.045 | 69.196 | 1.00 | 0.00 | C |
| ATOM | 4615 | C   | VAL B 879 | 75.430 | 34.731 | 69.529 | 1.00 | 0.00 | C |
| ATOM | 4616 | O   | VAL B 879 | 75.494 | 34.345 | 70.695 | 1.00 | 0.00 | O |
| ATOM | 4617 | CB  | VAL B 879 | 73.380 | 35.782 | 68.789 | 1.00 | 0.00 | C |
| ATOM | 4618 | CG1 | VAL B 879 | 73.364 | 34.812 | 67.597 | 1.00 | 0.00 | C |
| ATOM | 4619 | CG2 | VAL B 879 | 72.628 | 35.249 | 70.019 | 1.00 | 0.00 | C |
| ATOM | 4620 | N   | ALA B 880 | 75.922 | 34.012 | 68.505 | 1.00 | 0.00 | N |
| ATOM | 4621 | CA  | ALA B 880 | 76.489 | 32.712 | 68.709 | 1.00 | 0.00 | C |
| ATOM | 4622 | C   | ALA B 880 | 77.679 | 32.836 | 69.603 | 1.00 | 0.00 | C |
| ATOM | 4623 | O   | ALA B 880 | 77.877 | 32.031 | 70.509 | 1.00 | 0.00 | O |
| ATOM | 4624 | CB  | ALA B 880 | 76.967 | 32.062 | 67.398 | 1.00 | 0.00 | C |
| ATOM | 4625 | N   | PHE B 881 | 78.508 | 33.865 | 69.373 | 1.00 | 0.00 | N |
| ATOM | 4626 | CA  | PHE B 881 | 79.691 | 34.042 | 70.158 | 1.00 | 0.00 | C |
| ATOM | 4627 | C   | PHE B 881 | 79.272 | 34.292 | 71.570 | 1.00 | 0.00 | C |
| ATOM | 4628 | O   | PHE B 881 | 79.833 | 33.724 | 72.506 | 1.00 | 0.00 | O |
| ATOM | 4629 | CB  | PHE B 881 | 80.519 | 35.252 | 69.689 | 1.00 | 0.00 | C |
| ATOM | 4630 | CG  | PHE B 881 | 81.731 | 35.384 | 70.541 | 1.00 | 0.00 | C |
| ATOM | 4631 | CD1 | PHE B 881 | 82.847 | 34.614 | 70.296 | 1.00 | 0.00 | C |
| ATOM | 4632 | CD2 | PHE B 881 | 81.766 | 36.286 | 71.580 | 1.00 | 0.00 | C |
| ATOM | 4633 | CE1 | PHE B 881 | 83.971 | 34.736 | 71.079 | 1.00 | 0.00 | C |
| ATOM | 4634 | CE2 | PHE B 881 | 82.887 | 36.411 | 72.365 | 1.00 | 0.00 | C |
| ATOM | 4635 | CZ  | PHE B 881 | 83.993 | 35.637 | 72.118 | 1.00 | 0.00 | C |
| ATOM | 4636 | N   | GLY B 882 | 78.246 | 35.143 | 71.753 | 1.00 | 0.00 | N |
| ATOM | 4637 | CA  | GLY B 882 | 77.816 | 35.515 | 73.064 | 1.00 | 0.00 | C |
| ATOM | 4638 | C   | GLY B 882 | 77.346 | 34.308 | 73.809 | 1.00 | 0.00 | C |
| ATOM | 4639 | O   | GLY B 882 | 77.648 | 34.154 | 74.993 | 1.00 | 0.00 | O |
| ATOM | 4640 | N   | VAL B 883 | 76.576 | 33.423 | 73.151 | 1.00 | 0.00 | N |
| ATOM | 4641 | CA  | VAL B 883 | 76.092 | 32.276 | 73.855 | 1.00 | 0.00 | C |
| ATOM | 4642 | C   | VAL B 883 | 77.255 | 31.421 | 74.240 | 1.00 | 0.00 | C |
| ATOM | 4643 | O   | VAL B 883 | 77.294 | 30.869 | 75.337 | 1.00 | 0.00 | O |
| ATOM | 4644 | CB  | VAL B 883 | 75.093 | 31.451 | 73.092 | 1.00 | 0.00 | C |
| ATOM | 4645 | CG1 | VAL B 883 | 73.846 | 32.315 | 72.851 | 1.00 | 0.00 | C |
| ATOM | 4646 | CG2 | VAL B 883 | 75.727 | 30.926 | 71.799 | 1.00 | 0.00 | C |
| ATOM | 4647 | N   | ALA B 884 | 78.251 | 31.301 | 73.346 | 1.00 | 0.00 | N |
| ATOM | 4648 | CA  | ALA B 884 | 79.382 | 30.464 | 73.629 | 1.00 | 0.00 | C |
| ATOM | 4649 | C   | ALA B 884 | 80.085 | 30.998 | 74.839 | 1.00 | 0.00 | C |
| ATOM | 4650 | O   | ALA B 884 | 80.481 | 30.238 | 75.721 | 1.00 | 0.00 | O |
| ATOM | 4651 | CB  | ALA B 884 | 80.402 | 30.441 | 72.478 | 1.00 | 0.00 | C |
| ATOM | 4652 | N   | ARG B 885 | 80.250 | 32.331 | 74.919 | 1.00 | 0.00 | N |
| ATOM | 4653 | CA  | ARG B 885 | 80.962 | 32.926 | 76.012 | 1.00 | 0.00 | C |
| ATOM | 4654 | C   | ARG B 885 | 80.226 | 32.668 | 77.284 | 1.00 | 0.00 | C |
| ATOM | 4655 | O   | ARG B 885 | 80.831 | 32.340 | 78.304 | 1.00 | 0.00 | O |
| ATOM | 4656 | CB  | ARG B 885 | 81.099 | 34.453 | 75.884 | 1.00 | 0.00 | C |
| ATOM | 4657 | CG  | ARG B 885 | 82.010 | 34.895 | 74.737 | 1.00 | 0.00 | C |



|      |      |     |     |   |     |        |        |        |      |      |   |
|------|------|-----|-----|---|-----|--------|--------|--------|------|------|---|
| ATOM | 4658 | CD  | ARG | B | 885 | 83.447 | 35.199 | 75.169 | 1.00 | 0.00 | C |
| ATOM | 4659 | NE  | ARG | B | 885 | 84.157 | 33.901 | 75.349 | 1.00 | 0.00 | N |
| ATOM | 4660 | CZ  | ARG | B | 885 | 84.202 | 33.312 | 76.582 | 1.00 | 0.00 | C |
| ATOM | 4661 | NH1 | ARG | B | 885 | 83.596 | 33.910 | 77.646 | 1.00 | 0.00 | N |
| ATOM | 4662 | NH2 | ARG | B | 885 | 84.856 | 32.124 | 76.750 | 1.00 | 0.00 | N |
| ATOM | 4663 | N   | GLN | B | 886 | 78.889 | 32.797 | 77.258 | 1.00 | 0.00 | N |
| ATOM | 4664 | CA  | GLN | B | 886 | 78.155 | 32.627 | 78.473 | 1.00 | 0.00 | C |
| ATOM | 4665 | C   | GLN | B | 886 | 78.364 | 31.228 | 78.944 | 1.00 | 0.00 | C |
| ATOM | 4666 | O   | GLN | B | 886 | 78.560 | 30.992 | 80.136 | 1.00 | 0.00 | O |
| ATOM | 4667 | CB  | GLN | B | 886 | 76.646 | 32.820 | 78.298 | 1.00 | 0.00 | C |
| ATOM | 4668 | CG  | GLN | B | 886 | 75.884 | 32.767 | 79.620 | 1.00 | 0.00 | C |
| ATOM | 4669 | CD  | GLN | B | 886 | 74.413 | 32.684 | 79.265 | 1.00 | 0.00 | C |
| ATOM | 4670 | NE2 | GLN | B | 886 | 73.522 | 33.008 | 80.239 | 1.00 | 0.00 | N |
| ATOM | 4671 | OE1 | GLN | B | 886 | 74.074 | 32.316 | 78.141 | 1.00 | 0.00 | O |
| ATOM | 4672 | N   | GLY | B | 887 | 78.339 | 30.260 | 78.011 | 1.00 | 0.00 | N |
| ATOM | 4673 | CA  | GLY | B | 887 | 78.486 | 28.886 | 78.391 | 1.00 | 0.00 | C |
| ATOM | 4674 | C   | GLY | B | 887 | 79.837 | 28.696 | 79.004 | 1.00 | 0.00 | C |
| ATOM | 4675 | O   | GLY | B | 887 | 79.982 | 28.000 | 80.008 | 1.00 | 0.00 | O |
| ATOM | 4676 | N   | ILE | B | 888 | 80.868 | 29.309 | 78.399 | 1.00 | 0.00 | N |
| ATOM | 4677 | CA  | ILE | B | 888 | 82.209 | 29.153 | 78.876 | 1.00 | 0.00 | C |
| ATOM | 4678 | C   | ILE | B | 888 | 82.340 | 29.749 | 80.241 | 1.00 | 0.00 | C |
| ATOM | 4679 | O   | ILE | B | 888 | 82.931 | 29.143 | 81.134 | 1.00 | 0.00 | O |
| ATOM | 4680 | CB  | ILE | B | 888 | 83.218 | 29.843 | 78.003 | 1.00 | 0.00 | C |
| ATOM | 4681 | CG1 | ILE | B | 888 | 83.232 | 29.220 | 76.599 | 1.00 | 0.00 | C |
| ATOM | 4682 | CG2 | ILE | B | 888 | 84.577 | 29.789 | 78.720 | 1.00 | 0.00 | C |
| ATOM | 4683 | CD1 | ILE | B | 888 | 83.617 | 27.741 | 76.591 | 1.00 | 0.00 | C |
| ATOM | 4684 | N   | LEU | B | 889 | 81.769 | 30.949 | 80.446 | 1.00 | 0.00 | N |
| ATOM | 4685 | CA  | LEU | B | 889 | 81.979 | 31.651 | 81.675 | 1.00 | 0.00 | C |
| ATOM | 4686 | C   | LEU | B | 889 | 81.461 | 30.860 | 82.832 | 1.00 | 0.00 | C |
| ATOM | 4687 | O   | LEU | B | 889 | 82.178 | 30.638 | 83.805 | 1.00 | 0.00 | O |
| ATOM | 4688 | CB  | LEU | B | 889 | 81.253 | 33.011 | 81.714 | 1.00 | 0.00 | C |
| ATOM | 4689 | CG  | LEU | B | 889 | 81.714 | 33.998 | 80.628 | 1.00 | 0.00 | C |
| ATOM | 4690 | CD1 | LEU | B | 889 | 80.956 | 35.332 | 80.728 | 1.00 | 0.00 | C |
| ATOM | 4691 | CD2 | LEU | B | 889 | 83.240 | 34.175 | 80.640 | 1.00 | 0.00 | C |
| ATOM | 4692 | N   | ARG | B | 890 | 80.203 | 30.391 | 82.756 | 1.00 | 0.00 | N |
| ATOM | 4693 | CA  | ARG | B | 890 | 79.663 | 29.692 | 83.881 | 1.00 | 0.00 | C |
| ATOM | 4694 | C   | ARG | B | 890 | 78.460 | 28.956 | 83.399 | 1.00 | 0.00 | C |
| ATOM | 4695 | O   | ARG | B | 890 | 78.077 | 29.066 | 82.235 | 1.00 | 0.00 | O |
| ATOM | 4696 | CB  | ARG | B | 890 | 79.192 | 30.637 | 84.998 | 1.00 | 0.00 | C |
| ATOM | 4697 | CG  | ARG | B | 890 | 78.093 | 31.597 | 84.532 | 1.00 | 0.00 | C |
| ATOM | 4698 | CD  | ARG | B | 890 | 77.732 | 32.684 | 85.545 | 1.00 | 0.00 | C |
| ATOM | 4699 | NE  | ARG | B | 890 | 78.671 | 33.823 | 85.342 | 1.00 | 0.00 | N |
| ATOM | 4700 | CZ  | ARG | B | 890 | 79.807 | 33.919 | 86.093 | 1.00 | 0.00 | C |
| ATOM | 4701 | NH1 | ARG | B | 890 | 80.078 | 32.978 | 87.045 | 1.00 | 0.00 | N |

|      |      |               |        |        |        |      |      |   |
|------|------|---------------|--------|--------|--------|------|------|---|
| ATOM | 4702 | NH2 ARG B 890 | 80.668 | 34.960 | 85.895 | 1.00 | 0.00 | N |
| ATOM | 4703 | N GLN B 891   | 77.832 | 28.162 | 84.287 | 1.00 | 0.00 | N |
| ATOM | 4704 | CA GLN B 891  | 76.649 | 27.480 | 83.870 | 1.00 | 0.00 | C |
| ATOM | 4705 | C GLN B 891   | 75.589 | 28.514 | 83.706 | 1.00 | 0.00 | C |
| ATOM | 4706 | O GLN B 891   | 75.594 | 29.541 | 84.385 | 1.00 | 0.00 | O |
| ATOM | 4707 | CB GLN B 891  | 76.155 | 26.398 | 84.850 | 1.00 | 0.00 | C |
| ATOM | 4708 | CG GLN B 891  | 75.829 | 26.914 | 86.252 | 1.00 | 0.00 | C |
| ATOM | 4709 | CD GLN B 891  | 77.131 | 26.950 | 87.032 | 1.00 | 0.00 | C |
| ATOM | 4710 | NE2 GLN B 891 | 78.109 | 26.102 | 86.612 | 1.00 | 0.00 | N |
| ATOM | 4711 | OE1 GLN B 891 | 77.279 | 27.706 | 87.991 | 1.00 | 0.00 | O |
| ATOM | 4712 | N ASN B 892   | 74.664 | 28.281 | 82.758 | 1.00 | 0.00 | N |
| ATOM | 4713 | CA ASN B 892  | 73.629 | 29.235 | 82.508 | 1.00 | 0.00 | C |
| ATOM | 4714 | C ASN B 892   | 72.751 | 29.211 | 83.699 | 1.00 | 0.00 | C |
| ATOM | 4715 | O ASN B 892   | 72.573 | 28.175 | 84.338 | 1.00 | 0.00 | O |
| ATOM | 4716 | CB ASN B 892  | 72.760 | 28.878 | 81.292 | 1.00 | 0.00 | C |
| ATOM | 4717 | CG ASN B 892  | 73.656 | 28.902 | 80.065 | 1.00 | 0.00 | C |
| ATOM | 4718 | ND2 ASN B 892 | 73.505 | 29.956 | 79.222 | 1.00 | 0.00 | N |
| ATOM | 4719 | OD1 ASN B 892 | 74.470 | 28.002 | 79.857 | 1.00 | 0.00 | O |
| ATOM | 4720 | N GLU B 893   | 72.175 | 30.368 | 84.053 | 1.00 | 0.00 | N |
| ATOM | 4721 | CA GLU B 893  | 71.347 | 30.293 | 85.209 | 1.00 | 0.00 | C |
| ATOM | 4722 | C GLU B 893   | 70.011 | 29.783 | 84.755 | 1.00 | 0.00 | C |
| ATOM | 4723 | O GLU B 893   | 69.284 | 30.516 | 84.068 | 1.00 | 0.00 | O |
| ATOM | 4724 | CB GLU B 893  | 71.159 | 31.637 | 85.904 | 1.00 | 0.00 | C |
| ATOM | 4725 | CG GLU B 893  | 70.496 | 31.575 | 87.273 | 1.00 | 0.00 | C |
| ATOM | 4726 | CD GLU B 893  | 71.564 | 31.248 | 88.306 | 1.00 | 0.00 | C |
| ATOM | 4727 | OE1 GLU B 893 | 72.761 | 31.179 | 87.923 | 1.00 | 0.00 | O |
| ATOM | 4728 | OE2 GLU B 893 | 71.196 | 31.065 | 89.499 | 1.00 | 0.00 | O |
| ATOM | 4729 | N GLN B 894   | 69.712 | 28.496 | 85.115 | 1.00 | 0.00 | N |
| ATOM | 4730 | CA GLN B 894  | 68.503 | 27.777 | 84.794 | 1.00 | 0.00 | C |
| ATOM | 4731 | C GLN B 894   | 67.372 | 28.407 | 85.527 | 1.00 | 0.00 | C |
| ATOM | 4732 | O GLN B 894   | 66.303 | 28.642 | 84.963 | 1.00 | 0.00 | O |
| ATOM | 4733 | CB GLN B 894  | 68.552 | 26.291 | 85.184 | 1.00 | 0.00 | C |
| ATOM | 4734 | CG GLN B 894  | 68.644 | 26.038 | 86.690 | 1.00 | 0.00 | C |
| ATOM | 4735 | CD GLN B 894  | 68.681 | 24.532 | 86.901 | 1.00 | 0.00 | C |
| ATOM | 4736 | NE2 GLN B 894 | 69.702 | 23.861 | 86.300 | 1.00 | 0.00 | N |
| ATOM | 4737 | OE1 GLN B 894 | 67.824 | 23.965 | 87.576 | 1.00 | 0.00 | O |
| ATOM | 4738 | N ARG B 895   | 67.586 | 28.702 | 86.822 | 1.00 | 0.00 | N |
| ATOM | 4739 | CA ARG B 895  | 66.543 | 29.335 | 87.562 | 1.00 | 0.00 | C |
| ATOM | 4740 | C ARG B 895   | 66.311 | 30.660 | 86.931 | 1.00 | 0.00 | C |
| ATOM | 4741 | O ARG B 895   | 65.170 | 31.054 | 86.696 | 1.00 | 0.00 | O |
| ATOM | 4742 | CB ARG B 895  | 66.903 | 29.604 | 89.031 | 1.00 | 0.00 | C |
| ATOM | 4743 | CG ARG B 895  | 66.899 | 28.355 | 89.914 | 1.00 | 0.00 | C |
| ATOM | 4744 | CD ARG B 895  | 65.533 | 27.666 | 89.968 | 1.00 | 0.00 | C |
| ATOM | 4745 | NE ARG B 895  | 65.531 | 26.753 | 91.143 | 1.00 | 0.00 | N |

|      |      |     |           |        |        |        |      |      |   |
|------|------|-----|-----------|--------|--------|--------|------|------|---|
| ATOM | 4746 | CZ  | ARG B 895 | 66.078 | 25.503 | 91.055 | 1.00 | 0.00 | C |
| ATOM | 4747 | NH1 | ARG B 895 | 66.691 | 25.101 | 89.905 | 1.00 | 0.00 | N |
| ATOM | 4748 | NH2 | ARG B 895 | 66.011 | 24.658 | 92.125 | 1.00 | 0.00 | N |
| ATOM | 4749 | N   | TRP B 896 | 67.402 | 31.384 | 86.616 | 1.00 | 0.00 | N |
| ATOM | 4750 | CA  | TRP B 896 | 67.206 | 32.685 | 86.054 | 1.00 | 0.00 | C |
| ATOM | 4751 | C   | TRP B 896 | 67.668 | 32.659 | 84.638 | 1.00 | 0.00 | C |
| ATOM | 4752 | O   | TRP B 896 | 68.775 | 33.104 | 84.322 | 1.00 | 0.00 | O |
| ATOM | 4753 | CB  | TRP B 896 | 68.002 | 33.761 | 86.809 | 1.00 | 0.00 | C |
| ATOM | 4754 | CG  | TRP B 896 | 67.512 | 34.029 | 88.216 | 1.00 | 0.00 | C |
| ATOM | 4755 | CD1 | TRP B 896 | 66.669 | 35.002 | 88.663 | 1.00 | 0.00 | C |
| ATOM | 4756 | CD2 | TRP B 896 | 67.876 | 33.252 | 89.370 | 1.00 | 0.00 | C |
| ATOM | 4757 | CE2 | TRP B 896 | 67.228 | 33.814 | 90.469 | 1.00 | 0.00 | C |
| ATOM | 4758 | CE3 | TRP B 896 | 68.682 | 32.161 | 89.506 | 1.00 | 0.00 | C |
| ATOM | 4759 | NE1 | TRP B 896 | 66.490 | 34.886 | 90.020 | 1.00 | 0.00 | N |
| ATOM | 4760 | CZ2 | TRP B 896 | 67.375 | 33.285 | 91.721 | 1.00 | 0.00 | C |
| ATOM | 4761 | CZ3 | TRP B 896 | 68.831 | 31.635 | 90.770 | 1.00 | 0.00 | C |
| ATOM | 4762 | CH2 | TRP B 896 | 68.193 | 32.187 | 91.859 | 1.00 | 0.00 | C |
| ATOM | 4763 | N   | ARG B 897 | 66.823 | 32.125 | 83.738 | 1.00 | 0.00 | N |
| ATOM | 4764 | CA  | ARG B 897 | 67.165 | 32.097 | 82.348 | 1.00 | 0.00 | C |
| ATOM | 4765 | C   | ARG B 897 | 67.131 | 33.496 | 81.836 | 1.00 | 0.00 | C |
| ATOM | 4766 | O   | ARG B 897 | 67.988 | 33.919 | 81.063 | 1.00 | 0.00 | O |
| ATOM | 4767 | CB  | ARG B 897 | 66.175 | 31.300 | 81.491 | 1.00 | 0.00 | C |
| ATOM | 4768 | CG  | ARG B 897 | 66.662 | 31.184 | 80.048 | 1.00 | 0.00 | C |
| ATOM | 4769 | CD  | ARG B 897 | 65.623 | 30.673 | 79.057 | 1.00 | 0.00 | C |
| ATOM | 4770 | NE  | ARG B 897 | 66.342 | 30.437 | 77.774 | 1.00 | 0.00 | N |
| ATOM | 4771 | CZ  | ARG B 897 | 65.732 | 30.675 | 76.575 | 1.00 | 0.00 | C |
| ATOM | 4772 | NH1 | ARG B 897 | 64.463 | 31.180 | 76.538 | 1.00 | 0.00 | N |
| ATOM | 4773 | NH2 | ARG B 897 | 66.397 | 30.410 | 75.412 | 1.00 | 0.00 | N |
| ATOM | 4774 | N   | TRP B 898 | 66.116 | 34.253 | 82.283 | 1.00 | 0.00 | N |
| ATOM | 4775 | CA  | TRP B 898 | 65.899 | 35.577 | 81.787 | 1.00 | 0.00 | C |
| ATOM | 4776 | C   | TRP B 898 | 67.061 | 36.450 | 82.111 | 1.00 | 0.00 | C |
| ATOM | 4777 | O   | TRP B 898 | 67.610 | 37.112 | 81.228 | 1.00 | 0.00 | O |
| ATOM | 4778 | CB  | TRP B 898 | 64.676 | 36.264 | 82.416 | 1.00 | 0.00 | C |
| ATOM | 4779 | CG  | TRP B 898 | 63.355 | 35.616 | 82.092 | 1.00 | 0.00 | C |
| ATOM | 4780 | CD1 | TRP B 898 | 62.527 | 34.888 | 82.894 | 1.00 | 0.00 | C |
| ATOM | 4781 | CD2 | TRP B 898 | 62.734 | 35.663 | 80.799 | 1.00 | 0.00 | C |
| ATOM | 4782 | CE2 | TRP B 898 | 61.541 | 34.949 | 80.890 | 1.00 | 0.00 | C |
| ATOM | 4783 | CE3 | TRP B 898 | 63.131 | 36.245 | 79.630 | 1.00 | 0.00 | C |
| ATOM | 4784 | NE1 | TRP B 898 | 61.425 | 34.481 | 82.185 | 1.00 | 0.00 | N |
| ATOM | 4785 | CZ2 | TRP B 898 | 60.720 | 34.809 | 79.811 | 1.00 | 0.00 | C |
| ATOM | 4786 | CZ3 | TRP B 898 | 62.297 | 36.102 | 78.543 | 1.00 | 0.00 | C |
| ATOM | 4787 | CH2 | TRP B 898 | 61.116 | 35.398 | 78.632 | 1.00 | 0.00 | C |
| ATOM | 4788 | N   | ILE B 899 | 67.481 | 36.476 | 83.387 | 1.00 | 0.00 | N |
| ATOM | 4789 | CA  | ILE B 899 | 68.511 | 37.409 | 83.735 | 1.00 | 0.00 | C |

|      |      |     |           |        |        |        |      |      |   |
|------|------|-----|-----------|--------|--------|--------|------|------|---|
| ATOM | 4790 | C   | ILE B 899 | 69.778 | 37.050 | 83.033 | 1.00 | 0.00 | C |
| ATOM | 4791 | O   | ILE B 899 | 70.439 | 37.915 | 82.462 | 1.00 | 0.00 | O |
| ATOM | 4792 | CB  | ILE B 899 | 68.769 | 37.513 | 85.213 | 1.00 | 0.00 | C |
| ATOM | 4793 | CG1 | ILE B 899 | 69.698 | 38.699 | 85.518 | 1.00 | 0.00 | C |
| ATOM | 4794 | CG2 | ILE B 899 | 69.296 | 36.167 | 85.715 | 1.00 | 0.00 | C |
| ATOM | 4795 | CD1 | ILE B 899 | 69.796 | 39.029 | 87.007 | 1.00 | 0.00 | C |
| ATOM | 4796 | N   | PHE B 900 | 70.147 | 35.756 | 83.039 | 1.00 | 0.00 | N |
| ATOM | 4797 | CA  | PHE B 900 | 71.374 | 35.366 | 82.412 | 1.00 | 0.00 | C |
| ATOM | 4798 | C   | PHE B 900 | 71.314 | 35.623 | 80.946 | 1.00 | 0.00 | C |
| ATOM | 4799 | O   | PHE B 900 | 72.275 | 36.135 | 80.380 | 1.00 | 0.00 | O |
| ATOM | 4800 | CB  | PHE B 900 | 71.721 | 33.897 | 82.677 | 1.00 | 0.00 | C |
| ATOM | 4801 | CG  | PHE B 900 | 72.284 | 33.883 | 84.054 | 1.00 | 0.00 | C |
| ATOM | 4802 | CD1 | PHE B 900 | 71.564 | 34.403 | 85.102 | 1.00 | 0.00 | C |
| ATOM | 4803 | CD2 | PHE B 900 | 73.563 | 33.433 | 84.284 | 1.00 | 0.00 | C |
| ATOM | 4804 | CE1 | PHE B 900 | 72.075 | 34.400 | 86.378 | 1.00 | 0.00 | C |
| ATOM | 4805 | CE2 | PHE B 900 | 74.082 | 33.429 | 85.559 | 1.00 | 0.00 | C |
| ATOM | 4806 | CZ  | PHE B 900 | 73.335 | 33.904 | 86.610 | 1.00 | 0.00 | C |
| ATOM | 4807 | N   | ARG B 901 | 70.188 | 35.285 | 80.290 | 1.00 | 0.00 | N |
| ATOM | 4808 | CA  | ARG B 901 | 70.123 | 35.484 | 78.867 | 1.00 | 0.00 | C |
| ATOM | 4809 | C   | ARG B 901 | 70.261 | 36.942 | 78.574 | 1.00 | 0.00 | C |
| ATOM | 4810 | O   | ARG B 901 | 71.006 | 37.334 | 77.678 | 1.00 | 0.00 | O |
| ATOM | 4811 | CB  | ARG B 901 | 68.803 | 35.022 | 78.229 | 1.00 | 0.00 | C |
| ATOM | 4812 | CG  | ARG B 901 | 68.829 | 35.125 | 76.699 | 1.00 | 0.00 | C |
| ATOM | 4813 | CD  | ARG B 901 | 67.540 | 34.674 | 76.013 | 1.00 | 0.00 | C |
| ATOM | 4814 | NE  | ARG B 901 | 66.693 | 35.882 | 75.804 | 1.00 | 0.00 | N |
| ATOM | 4815 | CZ  | ARG B 901 | 65.793 | 36.259 | 76.758 | 1.00 | 0.00 | C |
| ATOM | 4816 | NH1 | ARG B 901 | 65.657 | 35.519 | 77.899 | 1.00 | 0.00 | N |
| ATOM | 4817 | NH2 | ARG B 901 | 65.029 | 37.375 | 76.572 | 1.00 | 0.00 | N |
| ATOM | 4818 | N   | SER B 902 | 69.550 | 37.790 | 79.341 | 1.00 | 0.00 | N |
| ATOM | 4819 | CA  | SER B 902 | 69.593 | 39.202 | 79.080 | 1.00 | 0.00 | C |
| ATOM | 4820 | C   | SER B 902 | 70.993 | 39.669 | 79.284 | 1.00 | 0.00 | C |
| ATOM | 4821 | O   | SER B 902 | 71.509 | 40.475 | 78.512 | 1.00 | 0.00 | O |
| ATOM | 4822 | CB  | SER B 902 | 68.684 | 40.005 | 80.033 | 1.00 | 0.00 | C |
| ATOM | 4823 | OG  | SER B 902 | 69.145 | 39.886 | 81.373 | 1.00 | 0.00 | O |
| ATOM | 4824 | N   | VAL B 903 | 71.655 | 39.143 | 80.326 | 1.00 | 0.00 | N |
| ATOM | 4825 | CA  | VAL B 903 | 72.995 | 39.544 | 80.627 | 1.00 | 0.00 | C |
| ATOM | 4826 | C   | VAL B 903 | 73.860 | 39.150 | 79.478 | 1.00 | 0.00 | C |
| ATOM | 4827 | O   | VAL B 903 | 74.797 | 39.864 | 79.126 | 1.00 | 0.00 | O |
| ATOM | 4828 | CB  | VAL B 903 | 73.546 | 38.883 | 81.855 | 1.00 | 0.00 | C |
| ATOM | 4829 | CG1 | VAL B 903 | 75.040 | 39.232 | 81.973 | 1.00 | 0.00 | C |
| ATOM | 4830 | CG2 | VAL B 903 | 72.712 | 39.333 | 83.064 | 1.00 | 0.00 | C |
| ATOM | 4831 | N   | ILE B 904 | 73.568 | 37.989 | 78.863 | 1.00 | 0.00 | N |
| ATOM | 4832 | CA  | ILE B 904 | 74.390 | 37.517 | 77.790 | 1.00 | 0.00 | C |
| ATOM | 4833 | C   | ILE B 904 | 74.291 | 38.497 | 76.667 | 1.00 | 0.00 | C |

|      |      |     |           |        |        |        |      |      |   |
|------|------|-----|-----------|--------|--------|--------|------|------|---|
| ATOM | 4834 | O   | ILE B 904 | 75.287 | 38.853 | 76.043 | 1.00 | 0.00 | O |
| ATOM | 4835 | CB  | ILE B 904 | 73.838 | 36.308 | 77.096 | 1.00 | 0.00 | C |
| ATOM | 4836 | CG1 | ILE B 904 | 73.348 | 35.216 | 78.042 | 1.00 | 0.00 | C |
| ATOM | 4837 | CG2 | ILE B 904 | 74.943 | 35.798 | 76.160 | 1.00 | 0.00 | C |
| ATOM | 4838 | CD1 | ILE B 904 | 72.371 | 34.284 | 77.326 | 1.00 | 0.00 | C |
| ATOM | 4839 | N   | TYR B 905 | 73.048 | 38.881 | 76.318 | 1.00 | 0.00 | N |
| ATOM | 4840 | CA  | TYR B 905 | 72.850 | 39.720 | 75.173 | 1.00 | 0.00 | C |
| ATOM | 4841 | C   | TYR B 905 | 73.252 | 41.158 | 75.329 | 1.00 | 0.00 | C |
| ATOM | 4842 | O   | TYR B 905 | 74.097 | 41.650 | 74.583 | 1.00 | 0.00 | O |
| ATOM | 4843 | CB  | TYR B 905 | 71.389 | 39.718 | 74.695 | 1.00 | 0.00 | C |
| ATOM | 4844 | CG  | TYR B 905 | 71.125 | 38.384 | 74.089 | 1.00 | 0.00 | C |
| ATOM | 4845 | CD1 | TYR B 905 | 70.899 | 37.279 | 74.873 | 1.00 | 0.00 | C |
| ATOM | 4846 | CD2 | TYR B 905 | 71.102 | 38.249 | 72.719 | 1.00 | 0.00 | C |
| ATOM | 4847 | CE1 | TYR B 905 | 70.662 | 36.052 | 74.295 | 1.00 | 0.00 | C |
| ATOM | 4848 | CE2 | TYR B 905 | 70.863 | 37.028 | 72.139 | 1.00 | 0.00 | C |
| ATOM | 4849 | CZ  | TYR B 905 | 70.642 | 35.926 | 72.928 | 1.00 | 0.00 | C |
| ATOM | 4850 | OH  | TYR B 905 | 70.399 | 34.669 | 72.335 | 1.00 | 0.00 | O |
| ATOM | 4851 | N   | GLU B 906 | 72.701 | 41.867 | 76.331 | 1.00 | 0.00 | N |
| ATOM | 4852 | CA  | GLU B 906 | 72.849 | 43.298 | 76.302 | 1.00 | 0.00 | C |
| ATOM | 4853 | C   | GLU B 906 | 74.247 | 43.781 | 76.518 | 1.00 | 0.00 | C |
| ATOM | 4854 | O   | GLU B 906 | 74.728 | 44.591 | 75.729 | 1.00 | 0.00 | O |
| ATOM | 4855 | CB  | GLU B 906 | 71.920 | 44.033 | 77.285 | 1.00 | 0.00 | C |
| ATOM | 4856 | CG  | GLU B 906 | 71.948 | 45.548 | 77.088 | 1.00 | 0.00 | C |
| ATOM | 4857 | CD  | GLU B 906 | 71.383 | 45.833 | 75.704 | 1.00 | 0.00 | C |
| ATOM | 4858 | OE1 | GLU B 906 | 70.316 | 45.250 | 75.372 | 1.00 | 0.00 | O |
| ATOM | 4859 | OE2 | GLU B 906 | 72.013 | 46.628 | 74.958 | 1.00 | 0.00 | O |
| ATOM | 4860 | N   | PRO B 907 | 74.944 | 43.348 | 77.527 | 1.00 | 0.00 | N |
| ATOM | 4861 | CA  | PRO B 907 | 76.262 | 43.884 | 77.705 | 1.00 | 0.00 | C |
| ATOM | 4862 | C   | PRO B 907 | 77.182 | 43.423 | 76.627 | 1.00 | 0.00 | C |
| ATOM | 4863 | O   | PRO B 907 | 78.130 | 44.138 | 76.306 | 1.00 | 0.00 | O |
| ATOM | 4864 | CB  | PRO B 907 | 76.688 | 43.483 | 79.115 | 1.00 | 0.00 | C |
| ATOM | 4865 | CG  | PRO B 907 | 75.354 | 43.388 | 79.875 | 1.00 | 0.00 | C |
| ATOM | 4866 | CD  | PRO B 907 | 74.326 | 43.002 | 78.801 | 1.00 | 0.00 | C |
| ATOM | 4867 | N   | TYR B 908 | 76.935 | 42.220 | 76.084 | 1.00 | 0.00 | N |
| ATOM | 4868 | CA  | TYR B 908 | 77.779 | 41.669 | 75.068 | 1.00 | 0.00 | C |
| ATOM | 4869 | C   | TYR B 908 | 77.669 | 42.428 | 73.793 | 1.00 | 0.00 | C |
| ATOM | 4870 | O   | TYR B 908 | 78.667 | 42.617 | 73.098 | 1.00 | 0.00 | O |
| ATOM | 4871 | CB  | TYR B 908 | 77.590 | 40.157 | 74.864 | 1.00 | 0.00 | C |
| ATOM | 4872 | CG  | TYR B 908 | 78.328 | 39.545 | 76.012 | 1.00 | 0.00 | C |
| ATOM | 4873 | CD1 | TYR B 908 | 79.662 | 39.233 | 75.881 | 1.00 | 0.00 | C |
| ATOM | 4874 | CD2 | TYR B 908 | 77.714 | 39.306 | 77.220 | 1.00 | 0.00 | C |
| ATOM | 4875 | CE1 | TYR B 908 | 80.364 | 38.678 | 76.925 | 1.00 | 0.00 | C |
| ATOM | 4876 | CE2 | TYR B 908 | 78.405 | 38.749 | 78.269 | 1.00 | 0.00 | C |
| ATOM | 4877 | CZ  | TYR B 908 | 79.733 | 38.433 | 78.121 | 1.00 | 0.00 | C |

|      |      |               |        |        |        |      |      |   |
|------|------|---------------|--------|--------|--------|------|------|---|
| ATOM | 4878 | OH TYR B 908  | 80.451 | 37.862 | 79.193 | 1.00 | 0.00 | O |
| ATOM | 4879 | N LEU B 909   | 76.459 | 42.860 | 73.398 | 1.00 | 0.00 | N |
| ATOM | 4880 | CA LEU B 909  | 76.453 | 43.659 | 72.212 | 1.00 | 0.00 | C |
| ATOM | 4881 | C LEU B 909   | 77.203 | 44.920 | 72.517 | 1.00 | 0.00 | C |
| ATOM | 4882 | O LEU B 909   | 77.985 | 45.400 | 71.699 | 1.00 | 0.00 | O |
| ATOM | 4883 | CB LEU B 909  | 75.048 | 44.046 | 71.710 | 1.00 | 0.00 | C |
| ATOM | 4884 | CG LEU B 909  | 74.309 | 42.918 | 70.962 | 1.00 | 0.00 | C |
| ATOM | 4885 | CD1 LEU B 909 | 75.045 | 42.558 | 69.662 | 1.00 | 0.00 | C |
| ATOM | 4886 | CD2 LEU B 909 | 74.048 | 41.694 | 71.847 | 1.00 | 0.00 | C |
| ATOM | 4887 | N ALA B 910   | 76.978 | 45.479 | 73.723 | 1.00 | 0.00 | N |
| ATOM | 4888 | CA ALA B 910  | 77.547 | 46.741 | 74.103 | 1.00 | 0.00 | C |
| ATOM | 4889 | C ALA B 910   | 79.049 | 46.730 | 74.208 | 1.00 | 0.00 | C |
| ATOM | 4890 | O ALA B 910   | 79.706 | 47.582 | 73.615 | 1.00 | 0.00 | O |
| ATOM | 4891 | CB ALA B 910  | 76.999 | 47.237 | 75.452 | 1.00 | 0.00 | C |
| ATOM | 4892 | N MET B 911   | 79.655 | 45.765 | 74.934 | 1.00 | 0.00 | N |
| ATOM | 4893 | CA MET B 911  | 81.083 | 45.864 | 75.105 | 1.00 | 0.00 | C |
| ATOM | 4894 | C MET B 911   | 81.604 | 44.526 | 75.490 | 1.00 | 0.00 | C |
| ATOM | 4895 | O MET B 911   | 80.989 | 43.497 | 75.226 | 1.00 | 0.00 | O |
| ATOM | 4896 | CB MET B 911  | 81.539 | 46.787 | 76.250 | 1.00 | 0.00 | C |
| ATOM | 4897 | CG MET B 911  | 81.189 | 48.270 | 76.106 | 1.00 | 0.00 | C |
| ATOM | 4898 | SD MET B 911  | 79.476 | 48.704 | 76.525 | 1.00 | 0.00 | S |
| ATOM | 4899 | CE MET B 911  | 79.792 | 50.489 | 76.604 | 1.00 | 0.00 | C |
| ATOM | 4900 | N PHE B 912   | 82.811 | 44.503 | 76.091 | 1.00 | 0.00 | N |
| ATOM | 4901 | CA PHE B 912  | 83.297 | 43.230 | 76.514 | 1.00 | 0.00 | C |
| ATOM | 4902 | C PHE B 912   | 83.942 | 43.409 | 77.847 | 1.00 | 0.00 | C |
| ATOM | 4903 | O PHE B 912   | 84.854 | 44.222 | 77.994 | 1.00 | 0.00 | O |
| ATOM | 4904 | CB PHE B 912  | 84.310 | 42.648 | 75.519 | 1.00 | 0.00 | C |
| ATOM | 4905 | CG PHE B 912  | 83.556 | 42.585 | 74.234 | 1.00 | 0.00 | C |
| ATOM | 4906 | CD1 PHE B 912 | 83.515 | 43.685 | 73.404 | 1.00 | 0.00 | C |
| ATOM | 4907 | CD2 PHE B 912 | 82.870 | 41.452 | 73.867 | 1.00 | 0.00 | C |
| ATOM | 4908 | CE1 PHE B 912 | 82.816 | 43.651 | 72.223 | 1.00 | 0.00 | C |
| ATOM | 4909 | CE2 PHE B 912 | 82.170 | 41.412 | 72.685 | 1.00 | 0.00 | C |
| ATOM | 4910 | CZ PHE B 912  | 82.143 | 42.510 | 71.862 | 1.00 | 0.00 | C |
| ATOM | 4911 | N GLY B 913   | 83.482 | 42.662 | 78.876 | 1.00 | 0.00 | N |
| ATOM | 4912 | CA GLY B 913  | 82.355 | 41.770 | 78.810 | 1.00 | 0.00 | C |
| ATOM | 4913 | C GLY B 913   | 81.362 | 42.194 | 79.859 | 1.00 | 0.00 | C |
| ATOM | 4914 | O GLY B 913   | 81.094 | 43.378 | 80.053 | 1.00 | 0.00 | O |
| ATOM | 4915 | N GLN B 914   | 80.783 | 41.201 | 80.570 | 1.00 | 0.00 | N |
| ATOM | 4916 | CA GLN B 914  | 79.842 | 41.442 | 81.632 | 1.00 | 0.00 | C |
| ATOM | 4917 | C GLN B 914   | 80.627 | 41.779 | 82.858 | 1.00 | 0.00 | C |
| ATOM | 4918 | O GLN B 914   | 81.848 | 41.630 | 82.859 | 1.00 | 0.00 | O |
| ATOM | 4919 | CB GLN B 914  | 78.961 | 40.219 | 81.946 | 1.00 | 0.00 | C |
| ATOM | 4920 | CG GLN B 914  | 78.037 | 40.394 | 83.152 | 1.00 | 0.00 | C |
| ATOM | 4921 | CD GLN B 914  | 77.086 | 41.543 | 82.872 | 1.00 | 0.00 | C |

|      |      |     |           |        |        |        |      |      |   |
|------|------|-----|-----------|--------|--------|--------|------|------|---|
| ATOM | 4922 | NE2 | GLN B 914 | 76.311 | 41.951 | 83.912 | 1.00 | 0.00 | N |
| ATOM | 4923 | OE1 | GLN B 914 | 77.034 | 42.067 | 81.760 | 1.00 | 0.00 | O |
| ATOM | 4924 | N   | VAL B 915 | 79.953 | 42.325 | 83.899 | 1.00 | 0.00 | N |
| ATOM | 4925 | CA  | VAL B 915 | 80.601 | 42.596 | 85.153 | 1.00 | 0.00 | C |
| ATOM | 4926 | C   | VAL B 915 | 79.836 | 41.937 | 86.271 | 1.00 | 0.00 | C |
| ATOM | 4927 | O   | VAL B 915 | 78.862 | 42.474 | 86.792 | 1.00 | 0.00 | O |
| ATOM | 4928 | CB  | VAL B 915 | 80.715 | 44.065 | 85.455 | 1.00 | 0.00 | C |
| ATOM | 4929 | CG1 | VAL B 915 | 81.764 | 44.679 | 84.513 | 1.00 | 0.00 | C |
| ATOM | 4930 | CG2 | VAL B 915 | 79.333 | 44.711 | 85.280 | 1.00 | 0.00 | C |
| ATOM | 4931 | N   | PRO B 916 | 80.239 | 39.821 | 85.492 | 1.00 | 0.00 | N |
| ATOM | 4932 | CA  | PRO B 916 | 79.549 | 39.211 | 86.598 | 1.00 | 0.00 | C |
| ATOM | 4933 | C   | PRO B 916 | 79.992 | 39.877 | 87.858 | 1.00 | 0.00 | C |
| ATOM | 4934 | O   | PRO B 916 | 81.082 | 40.446 | 87.880 | 1.00 | 0.00 | O |
| ATOM | 4935 | CB  | PRO B 916 | 79.884 | 37.725 | 86.534 | 1.00 | 0.00 | C |
| ATOM | 4936 | CG  | PRO B 916 | 80.145 | 37.478 | 85.038 | 1.00 | 0.00 | C |
| ATOM | 4937 | CD  | PRO B 916 | 80.670 | 38.831 | 84.518 | 1.00 | 0.00 | C |
| ATOM | 4938 | N   | SER B 917 | 79.169 | 39.827 | 88.916 | 1.00 | 0.00 | N |
| ATOM | 4939 | CA  | SER B 917 | 79.597 | 40.445 | 90.132 | 1.00 | 0.00 | C |
| ATOM | 4940 | C   | SER B 917 | 80.769 | 39.655 | 90.604 | 1.00 | 0.00 | C |
| ATOM | 4941 | O   | SER B 917 | 80.999 | 38.535 | 90.148 | 1.00 | 0.00 | O |
| ATOM | 4942 | CB  | SER B 917 | 78.537 | 40.435 | 91.246 | 1.00 | 0.00 | C |
| ATOM | 4943 | OG  | SER B 917 | 77.427 | 41.230 | 90.859 | 1.00 | 0.00 | O |
| ATOM | 4944 | N   | ASP B 918 | 81.536 | 40.219 | 91.553 | 1.00 | 0.00 | N |
| ATOM | 4945 | CA  | ASP B 918 | 82.746 | 39.583 | 91.989 | 1.00 | 0.00 | C |
| ATOM | 4946 | C   | ASP B 918 | 82.444 | 38.203 | 92.469 | 1.00 | 0.00 | C |
| ATOM | 4947 | O   | ASP B 918 | 81.365 | 37.917 | 92.984 | 1.00 | 0.00 | O |
| ATOM | 4948 | CB  | ASP B 918 | 83.475 | 40.336 | 93.116 | 1.00 | 0.00 | C |
| ATOM | 4949 | CG  | ASP B 918 | 84.104 | 41.585 | 92.516 | 1.00 | 0.00 | C |
| ATOM | 4950 | OD1 | ASP B 918 | 84.125 | 41.696 | 91.263 | 1.00 | 0.00 | O |
| ATOM | 4951 | OD2 | ASP B 918 | 84.575 | 42.445 | 93.304 | 1.00 | 0.00 | O |
| ATOM | 4952 | N   | VAL B 919 | 83.431 | 37.302 | 92.287 | 1.00 | 0.00 | N |
| ATOM | 4953 | CA  | VAL B 919 | 83.255 | 35.924 | 92.623 | 1.00 | 0.00 | C |
| ATOM | 4954 | C   | VAL B 919 | 83.446 | 35.753 | 94.089 | 1.00 | 0.00 | C |
| ATOM | 4955 | O   | VAL B 919 | 84.526 | 35.971 | 94.635 | 1.00 | 0.00 | O |
| ATOM | 4956 | CB  | VAL B 919 | 84.206 | 35.021 | 91.886 | 1.00 | 0.00 | C |
| ATOM | 4957 | CG1 | VAL B 919 | 85.651 | 35.455 | 92.188 | 1.00 | 0.00 | C |
| ATOM | 4958 | CG2 | VAL B 919 | 83.897 | 33.569 | 92.278 | 1.00 | 0.00 | C |
| ATOM | 4959 | N   | ASP B 920 | 82.356 | 35.356 | 94.768 | 1.00 | 0.00 | N |
| ATOM | 4960 | CA  | ASP B 920 | 82.434 | 35.125 | 96.175 | 1.00 | 0.00 | C |
| ATOM | 4961 | C   | ASP B 920 | 82.818 | 33.700 | 96.330 | 1.00 | 0.00 | C |
| ATOM | 4962 | O   | ASP B 920 | 81.984 | 32.803 | 96.217 | 1.00 | 0.00 | O |
| ATOM | 4963 | CB  | ASP B 920 | 81.095 | 35.298 | 96.908 | 1.00 | 0.00 | C |
| ATOM | 4964 | CG  | ASP B 920 | 81.340 | 35.020 | 98.383 | 1.00 | 0.00 | C |
| ATOM | 4965 | OD1 | ASP B 920 | 82.534 | 34.996 | 98.787 | 1.00 | 0.00 | O |

|      |      |               |        |        |         |      |      |   |
|------|------|---------------|--------|--------|---------|------|------|---|
| ATOM | 4966 | OD2 ASP B 920 | 80.343 | 34.823 | 99.123  | 1.00 | 0.00 | O |
| ATOM | 4967 | N GLY B 921   | 84.108 | 33.450 | 96.584  | 1.00 | 0.00 | N |
| ATOM | 4968 | CA GLY B 921  | 84.475 | 32.089 | 96.769  | 1.00 | 0.00 | C |
| ATOM | 4969 | C GLY B 921   | 83.885 | 31.736 | 98.085  | 1.00 | 0.00 | C |
| ATOM | 4970 | O GLY B 921   | 83.389 | 32.600 | 98.806  | 1.00 | 0.00 | O |
| ATOM | 4971 | N THR B 922   | 83.879 | 30.444 | 98.425  | 1.00 | 0.00 | N |
| ATOM | 4972 | CA THR B 922  | 83.394 | 30.104 | 99.720  | 1.00 | 0.00 | C |
| ATOM | 4973 | C THR B 922   | 84.392 | 30.699 | 100.655 | 1.00 | 0.00 | C |
| ATOM | 4974 | O THR B 922   | 84.076 | 31.063 | 101.787 | 1.00 | 0.00 | O |
| ATOM | 4975 | CB THR B 922  | 83.343 | 28.628 | 99.970  | 1.00 | 0.00 | C |
| ATOM | 4976 | CG2 THR B 922 | 84.777 | 28.076 | 100.014 | 1.00 | 0.00 | C |
| ATOM | 4977 | OG1 THR B 922 | 82.674 | 28.363 | 101.194 | 1.00 | 0.00 | O |
| ATOM | 4978 | N THR B 923   | 85.641 | 30.804 | 100.163 | 1.00 | 0.00 | N |
| ATOM | 4979 | CA THR B 923  | 86.780 | 31.256 | 100.904 | 1.00 | 0.00 | C |
| ATOM | 4980 | C THR B 923   | 86.660 | 32.720 | 101.175 | 1.00 | 0.00 | C |
| ATOM | 4981 | O THR B 923   | 85.927 | 33.440 | 100.498 | 1.00 | 0.00 | O |
| ATOM | 4982 | CB THR B 923  | 88.054 | 31.030 | 100.144 | 1.00 | 0.00 | C |
| ATOM | 4983 | CG2 THR B 923 | 89.256 | 31.447 | 101.009 | 1.00 | 0.00 | C |
| ATOM | 4984 | OG1 THR B 923 | 88.168 | 29.659 | 99.802  | 1.00 | 0.00 | O |
| ATOM | 4985 | N TYR B 924   | 87.395 | 33.193 | 102.202 | 1.00 | 0.00 | N |
| ATOM | 4986 | CA TYR B 924  | 87.377 | 34.581 | 102.550 | 1.00 | 0.00 | C |
| ATOM | 4987 | C TYR B 924   | 88.685 | 35.128 | 102.092 | 1.00 | 0.00 | C |
| ATOM | 4988 | O TYR B 924   | 89.749 | 34.677 | 102.513 | 1.00 | 0.00 | O |
| ATOM | 4989 | CB TYR B 924  | 87.292 | 34.838 | 104.067 | 1.00 | 0.00 | C |
| ATOM | 4990 | CG TYR B 924  | 86.013 | 34.259 | 104.561 | 1.00 | 0.00 | C |
| ATOM | 4991 | CD1 TYR B 924 | 85.938 | 32.923 | 104.885 | 1.00 | 0.00 | C |
| ATOM | 4992 | CD2 TYR B 924 | 84.890 | 35.041 | 104.706 | 1.00 | 0.00 | C |
| ATOM | 4993 | CE1 TYR B 924 | 84.764 | 32.377 | 105.344 | 1.00 | 0.00 | C |
| ATOM | 4994 | CE2 TYR B 924 | 83.712 | 34.500 | 105.165 | 1.00 | 0.00 | C |
| ATOM | 4995 | CZ TYR B 924  | 83.646 | 33.165 | 105.485 | 1.00 | 0.00 | C |
| ATOM | 4996 | OH TYR B 924  | 82.440 | 32.607 | 105.956 | 1.00 | 0.00 | O |
| ATOM | 4997 | N ASP B 925   | 88.614 | 36.108 | 101.179 | 1.00 | 0.00 | N |
| ATOM | 4998 | CA ASP B 925  | 89.776 | 36.714 | 100.619 | 1.00 | 0.00 | C |
| ATOM | 4999 | C ASP B 925   | 90.269 | 37.700 | 101.622 | 1.00 | 0.00 | C |
| ATOM | 5000 | O ASP B 925   | 89.568 | 38.029 | 102.579 | 1.00 | 0.00 | O |
| ATOM | 5001 | CB ASP B 925  | 89.447 | 37.493 | 99.333  | 1.00 | 0.00 | C |
| ATOM | 5002 | CG ASP B 925  | 90.723 | 37.953 | 98.650  | 1.00 | 0.00 | C |
| ATOM | 5003 | OD1 ASP B 925 | 91.806 | 37.393 | 98.961  | 1.00 | 0.00 | O |
| ATOM | 5004 | OD2 ASP B 925 | 90.631 | 38.875 | 97.799  | 1.00 | 0.00 | O |
| ATOM | 5005 | N PHE B 926   | 91.517 | 38.162 | 101.442 | 1.00 | 0.00 | N |
| ATOM | 5006 | CA PHE B 926  | 92.005 | 39.201 | 102.282 | 1.00 | 0.00 | C |
| ATOM | 5007 | C PHE B 926   | 91.421 | 40.436 | 101.697 | 1.00 | 0.00 | C |
| ATOM | 5008 | O PHE B 926   | 91.157 | 40.497 | 100.497 | 1.00 | 0.00 | O |
| ATOM | 5009 | CB PHE B 926  | 93.541 | 39.306 | 102.323 | 1.00 | 0.00 | C |



|        |      |     |           |        |        |         |      |      |   |
|--------|------|-----|-----------|--------|--------|---------|------|------|---|
| ATOM   | 5010 | CG  | PHE B 926 | 94.045 | 39.545 | 100.942 | 1.00 | 0.00 | C |
| ATOM   | 5011 | CD1 | PHE B 926 | 94.064 | 38.522 | 100.024 | 1.00 | 0.00 | C |
| ATOM   | 5012 | CD2 | PHE B 926 | 94.525 | 40.781 | 100.572 | 1.00 | 0.00 | C |
| ATOM   | 5013 | CE1 | PHE B 926 | 94.538 | 38.729 | 98.749  | 1.00 | 0.00 | C |
| ATOM   | 5014 | CE2 | PHE B 926 | 95.000 | 40.994 | 99.299  | 1.00 | 0.00 | C |
| ATOM   | 5015 | CZ  | PHE B 926 | 95.004 | 39.969 | 98.383  | 1.00 | 0.00 | C |
| ATOM   | 5016 | N   | ALA B 927 | 91.172 | 41.455 | 102.534 | 1.00 | 0.00 | N |
| ATOM   | 5017 | CA  | ALA B 927 | 90.536 | 42.626 | 102.018 | 1.00 | 0.00 | C |
| ATOM   | 5018 | C   | ALA B 927 | 91.435 | 43.227 | 100.994 | 1.00 | 0.00 | C |
| ATOM   | 5019 | O   | ALA B 927 | 92.651 | 43.046 | 101.026 | 1.00 | 0.00 | O |
| ATOM   | 5020 | CB  | ALA B 927 | 90.254 | 43.695 | 103.086 | 1.00 | 0.00 | C |
| HETATM | 5021 | N   | HIE B 928 | 90.840 | 43.936 | 100.025 | 1.00 | 0.00 | N |
| HETATM | 5022 | CA  | HIE B 928 | 91.667 | 44.520 | 99.027  | 1.00 | 0.00 | C |
| HETATM | 5023 | C   | HIE B 928 | 92.188 | 45.797 | 99.578  | 1.00 | 0.00 | C |
| HETATM | 5024 | O   | HIE B 928 | 91.483 | 46.517 | 100.284 | 1.00 | 0.00 | O |
| HETATM | 5025 | CB  | HIE B 928 | 90.939 | 44.819 | 97.705  | 1.00 | 0.00 | C |
| HETATM | 5026 | CG  | HIE B 928 | 91.884 | 45.286 | 96.645  | 1.00 | 0.00 | C |
| HETATM | 5027 | CD2 | HIE B 928 | 91.896 | 46.436 | 95.916  | 1.00 | 0.00 | C |
| HETATM | 5028 | ND1 | HIE B 928 | 92.963 | 44.551 | 96.214  | 1.00 | 0.00 | N |
| HETATM | 5029 | CE1 | HIE B 928 | 93.578 | 45.290 | 95.253  | 1.00 | 0.00 | C |
| HETATM | 5030 | NE2 | HIE B 928 | 92.966 | 46.439 | 95.036  | 1.00 | 0.00 | N |
| ATOM   | 5031 | N   | CYS B 929 | 93.462 | 46.106 | 99.284  | 1.00 | 0.00 | N |
| ATOM   | 5032 | CA  | CYS B 929 | 93.994 | 47.331 | 99.782  | 1.00 | 0.00 | C |
| ATOM   | 5033 | C   | CYS B 929 | 93.243 | 48.417 | 99.092  | 1.00 | 0.00 | C |
| ATOM   | 5034 | O   | CYS B 929 | 92.940 | 48.322 | 97.903  | 1.00 | 0.00 | O |
| ATOM   | 5035 | CB  | CYS B 929 | 95.505 | 47.499 | 99.530  | 1.00 | 0.00 | C |
| ATOM   | 5036 | SG  | CYS B 929 | 95.950 | 47.316 | 97.781  | 1.00 | 0.00 | S |
| ATOM   | 5037 | N   | THR B 930 | 92.907 | 49.482 | 99.839  | 1.00 | 0.00 | N |
| ATOM   | 5038 | CA  | THR B 930 | 92.082 | 50.513 | 99.290  | 1.00 | 0.00 | C |
| ATOM   | 5039 | C   | THR B 930 | 92.769 | 51.136 | 98.119  | 1.00 | 0.00 | C |
| ATOM   | 5040 | O   | THR B 930 | 92.159 | 51.309 | 97.065  | 1.00 | 0.00 | O |
| ATOM   | 5041 | CB  | THR B 930 | 91.732 | 51.583 | 100.285 | 1.00 | 0.00 | C |
| ATOM   | 5042 | CG2 | THR B 930 | 93.008 | 52.318 | 100.734 | 1.00 | 0.00 | C |
| ATOM   | 5043 | OG1 | THR B 930 | 90.807 | 52.494 | 99.712  | 1.00 | 0.00 | O |
| ATOM   | 5044 | N   | PHE B 931 | 94.065 | 51.472 | 98.254  | 1.00 | 0.00 | N |
| ATOM   | 5045 | CA  | PHE B 931 | 94.731 | 52.062 | 97.137  | 1.00 | 0.00 | C |
| ATOM   | 5046 | C   | PHE B 931 | 94.965 | 50.945 | 96.181  | 1.00 | 0.00 | C |
| ATOM   | 5047 | O   | PHE B 931 | 95.182 | 49.807 | 96.592  | 1.00 | 0.00 | O |
| ATOM   | 5048 | CB  | PHE B 931 | 96.083 | 52.696 | 97.508  | 1.00 | 0.00 | C |
| ATOM   | 5049 | CG  | PHE B 931 | 95.774 | 53.773 | 98.489  | 1.00 | 0.00 | C |
| ATOM   | 5050 | CD1 | PHE B 931 | 95.607 | 53.472 | 99.819  | 1.00 | 0.00 | C |
| ATOM   | 5051 | CD2 | PHE B 931 | 95.641 | 55.082 | 98.082  | 1.00 | 0.00 | C |
| ATOM   | 5052 | CE1 | PHE B 931 | 95.315 | 54.458 | 100.736 | 1.00 | 0.00 | C |
| ATOM   | 5053 | CE2 | PHE B 931 | 95.351 | 56.070 | 98.995  | 1.00 | 0.00 | C |

|      |      |     |           |         |        |         |      |      |     |
|------|------|-----|-----------|---------|--------|---------|------|------|-----|
| ATOM | 5054 | CZ  | PHE B 931 | 95.188  | 55.761 | 100.323 | 1.00 | 0.00 | C   |
| ATOM | 5055 | N   | THR B 932 | 94.894  | 51.229 | 94.871  | 1.00 | 0.00 | N   |
| ATOM | 5056 | CA  | THR B 932 | 95.079  | 50.169 | 93.925  | 1.00 | 0.00 | C   |
| ATOM | 5057 | C   | THR B 932 | 96.539  | 50.056 | 93.643  | 1.00 | 0.00 | C   |
| ATOM | 5058 | O   | THR B 932 | 97.358  | 50.685 | 94.314  | 1.00 | 0.00 | O   |
| ATOM | 5059 | CB  | THR B 932 | 94.356  | 50.389 | 92.625  | 1.00 | 0.00 | C   |
| ATOM | 5060 | CG2 | THR B 932 | 92.851  | 50.513 | 92.917  | 1.00 | 0.00 | C   |
| ATOM | 5061 | OG1 | THR B 932 | 94.833  | 51.559 | 91.983  | 1.00 | 0.00 | O   |
| ATOM | 5062 | N   | GLY B 933 | 96.900  | 49.209 | 92.660  | 1.00 | 0.00 | N   |
| ATOM | 5063 | CA  | GLY B 933 | 98.278  | 49.029 | 92.304  | 1.00 | 0.00 | C   |
| ATOM | 5064 | C   | GLY B 933 | 98.327  | 48.793 | 90.828  | 1.00 | 0.00 | C   |
| ATOM | 5065 | O   | GLY B 933 | 97.345  | 48.357 | 90.229  | 1.00 | 0.00 | O   |
| ATOM | 5066 | N   | ASN B 934 | 99.488  | 49.082 | 90.203  | 1.00 | 0.00 | N   |
| ATOM | 5067 | CA  | ASN B 934 | 99.596  | 48.954 | 88.778  | 1.00 | 0.00 | C   |
| ATOM | 5068 | C   | ASN B 934 | 99.407  | 47.524 | 88.372  | 1.00 | 0.00 | C   |
| ATOM | 5069 | O   | ASN B 934 | 98.505  | 47.205 | 87.599  | 1.00 | 0.00 | O   |
| ATOM | 5070 | CB  | ASN B 934 | 100.975 | 49.397 | 88.255  | 1.00 | 0.00 | C   |
| ATOM | 5071 | CG  | ASN B 934 | 100.917 | 49.480 | 86.735  | 1.00 | 0.00 | C   |
| ATOM | 5072 | ND2 | ASN B 934 | 100.388 | 48.403 | 86.094  | 1.00 | 0.00 | N   |
| ATOM | 5073 | OD1 | ASN B 934 | 101.339 | 50.466 | 86.133  | 1.00 | 0.00 | O   |
| ATOM | 5074 | N   | GLU B 935 | 100.227 | 46.605 | 88.915  | 1.00 | 0.00 | N   |
| ATOM | 5075 | CA  | GLU B 935 | 100.078 | 45.241 | 88.502  | 1.00 | 0.00 | C   |
| ATOM | 5076 | C   | GLU B 935 | 99.636  | 44.477 | 89.697  | 1.00 | 0.00 | C   |
| ATOM | 5077 | O   | GLU B 935 | 99.947  | 44.846 | 90.829  | 1.00 | 0.00 | O   |
| ATOM | 5078 | CB  | GLU B 935 | 101.370 | 44.588 | 87.991  | 1.00 | 0.00 | C   |
| ATOM | 5079 | CG  | GLU B 935 | 101.129 | 43.178 | 87.444  | 1.00 | 0.00 | C   |
| ATOM | 5080 | CD  | GLU B 935 | 102.457 | 42.629 | 86.946  | 1.00 | 0.00 | C   |
| ATOM | 5081 | OE1 | GLU B 935 | 103.242 | 43.422 | 86.359  | 1.00 | 0.00 | O   |
| ATOM | 5082 | OE2 | GLU B 935 | 102.703 | 41.412 | 87.146  | 1.00 | 0.00 | O   |
| ATOM | 5083 | N   | SER B 936 | 98.871  | 43.394 | 89.475  | 1.00 | 0.00 | N   |
| ATOM | 5084 | CA  | SER B 936 | 98.394  | 42.665 | 90.606  | 1.00 | 0.00 | C   |
| ATOM | 5085 | C   | SER B 936 | 98.491  | 41.208 | 90.305  | 1.00 | 0.00 | C   |
| ATOM | 5086 | O   | SER B 936 | 98.634  | 40.803 | 89.151  | 1.00 | 0.00 | O   |
| ATOM | 5087 | CB  | SER B 936 | 96.924  | 42.969 | 90.935  | 1.00 | 0.00 | C   |
| ATOM | 5088 | OG  | SER B 936 | 96.500  | 42.223 | 92.067  | 1.00 | 0.00 | O   |
| ATOM | 5089 | N   | LYS B 937 | 98.466  | 40.377 | 91.366  | 1.00 | 0.00 | N   |
| ATOM | 5090 | CA  | LYS B 937 | 98.469  | 38.962 | 91.151  | 1.00 | 0.00 | C   |
| ATOM | 5091 | C   | LYS B 937 | 97.368  | 38.396 | 91.997  | 1.00 | 0.00 | C   |
| ATOM | 5092 | O   | LYS B 937 | 97.520  | 38.146 | 93.190  | 1.00 | 0.00 | O   |
| ATOM | 5093 | CB  | LYS B 937 | 99.790  | 38.291 | 91.559  | 1.00 | 0.00 | C   |
| ATOM | 5094 | CG  | LYS B 937 | 100.968 | 38.734 | 90.687  | 1.00 | 0.00 | C   |
| ATOM | 5095 | CD  | LYS B 937 | 100.777 | 38.425 | 89.201  | 1.00 | 0.00 | C   |
| ATOM | 5096 | CE  | LYS B 937 | 101.955 | 38.858 | 88.322  | 1.00 | 0.00 | C   |
| ATOM | 5097 | NZ  | LYS B 937 | 101.684 | 38.518 | 86.908  | 1.00 | 0.00 | N1+ |

|      |      |     |           |        |        |        |      |      |   |
|------|------|-----|-----------|--------|--------|--------|------|------|---|
| ATOM | 5098 | N   | PRO B 938 | 96.249 | 38.198 | 91.363 | 1.00 | 0.00 | N |
| ATOM | 5099 | CA  | PRO B 938 | 95.084 | 37.648 | 92.007 | 1.00 | 0.00 | C |
| ATOM | 5100 | C   | PRO B 938 | 95.214 | 36.163 | 92.103 | 1.00 | 0.00 | C |
| ATOM | 5101 | O   | PRO B 938 | 96.231 | 35.623 | 91.679 | 1.00 | 0.00 | O |
| ATOM | 5102 | CB  | PRO B 938 | 93.879 | 38.099 | 91.175 | 1.00 | 0.00 | C |
| ATOM | 5103 | CG  | PRO B 938 | 94.480 | 38.602 | 89.854 | 1.00 | 0.00 | C |
| ATOM | 5104 | CD  | PRO B 938 | 95.890 | 39.061 | 90.251 | 1.00 | 0.00 | C |
| ATOM | 5105 | N   | LEU B 939 | 94.192 | 35.486 | 92.659 | 1.00 | 0.00 | N |
| ATOM | 5106 | CA  | LEU B 939 | 94.256 | 34.068 | 92.853 | 1.00 | 0.00 | C |
| ATOM | 5107 | C   | LEU B 939 | 94.307 | 33.383 | 91.529 | 1.00 | 0.00 | C |
| ATOM | 5108 | O   | LEU B 939 | 93.458 | 33.586 | 90.661 | 1.00 | 0.00 | O |
| ATOM | 5109 | CB  | LEU B 939 | 93.059 | 33.530 | 93.648 | 1.00 | 0.00 | C |
| ATOM | 5110 | CG  | LEU B 939 | 92.988 | 34.116 | 95.070 | 1.00 | 0.00 | C |
| ATOM | 5111 | CD1 | LEU B 939 | 92.726 | 35.632 | 95.060 | 1.00 | 0.00 | C |
| ATOM | 5112 | CD2 | LEU B 939 | 91.965 | 33.363 | 95.919 | 1.00 | 0.00 | C |
| ATOM | 5113 | N   | CYS B 940 | 95.330 | 32.523 | 91.364 | 1.00 | 0.00 | N |
| ATOM | 5114 | CA  | CYS B 940 | 95.492 | 31.849 | 90.117 | 1.00 | 0.00 | C |
| ATOM | 5115 | C   | CYS B 940 | 94.363 | 30.938 | 89.950 | 1.00 | 0.00 | C |
| ATOM | 5116 | O   | CYS B 940 | 94.022 | 30.131 | 90.811 | 1.00 | 0.00 | O |
| ATOM | 5117 | CB  | CYS B 940 | 96.776 | 31.016 | 89.995 | 1.00 | 0.00 | C |
| ATOM | 5118 | SG  | CYS B 940 | 98.253 | 32.060 | 89.859 | 1.00 | 0.00 | S |
| ATOM | 5119 | N   | VAL B 941 | 93.737 | 31.063 | 88.789 | 1.00 | 0.00 | N |
| ATOM | 5120 | CA  | VAL B 941 | 92.642 | 30.203 | 88.579 | 1.00 | 0.00 | C |
| ATOM | 5121 | C   | VAL B 941 | 92.791 | 29.717 | 87.189 | 1.00 | 0.00 | C |
| ATOM | 5122 | O   | VAL B 941 | 93.572 | 30.250 | 86.404 | 1.00 | 0.00 | O |
| ATOM | 5123 | CB  | VAL B 941 | 91.337 | 30.914 | 88.724 | 1.00 | 0.00 | C |
| ATOM | 5124 | CG1 | VAL B 941 | 91.245 | 31.431 | 90.171 | 1.00 | 0.00 | C |
| ATOM | 5125 | CG2 | VAL B 941 | 91.267 | 32.027 | 87.668 | 1.00 | 0.00 | C |
| ATOM | 5126 | N   | GLU B 942 | 92.099 | 28.616 | 86.876 | 1.00 | 0.00 | N |
| ATOM | 5127 | CA  | GLU B 942 | 92.147 | 28.126 | 85.541 | 1.00 | 0.00 | C |
| ATOM | 5128 | C   | GLU B 942 | 91.400 | 29.088 | 84.666 | 1.00 | 0.00 | C |
| ATOM | 5129 | O   | GLU B 942 | 91.762 | 29.289 | 83.507 | 1.00 | 0.00 | O |
| ATOM | 5130 | CB  | GLU B 942 | 91.510 | 26.737 | 85.379 | 1.00 | 0.00 | C |
| ATOM | 5131 | CG  | GLU B 942 | 91.580 | 26.218 | 83.945 | 1.00 | 0.00 | C |
| ATOM | 5132 | CD  | GLU B 942 | 91.075 | 24.781 | 83.933 | 1.00 | 0.00 | C |
| ATOM | 5133 | OE1 | GLU B 942 | 90.907 | 24.206 | 85.040 | 1.00 | 0.00 | O |
| ATOM | 5134 | OE2 | GLU B 942 | 90.853 | 24.244 | 82.814 | 1.00 | 0.00 | O |
| ATOM | 5135 | N   | LEU B 943 | 90.324 | 29.696 | 85.214 | 1.00 | 0.00 | N |
| ATOM | 5136 | CA  | LEU B 943 | 89.428 | 30.568 | 84.487 | 1.00 | 0.00 | C |
| ATOM | 5137 | C   | LEU B 943 | 89.914 | 31.996 | 84.459 | 1.00 | 0.00 | C |
| ATOM | 5138 | O   | LEU B 943 | 91.000 | 32.293 | 84.950 | 1.00 | 0.00 | O |
| ATOM | 5139 | CB  | LEU B 943 | 87.987 | 30.530 | 85.016 | 1.00 | 0.00 | C |
| ATOM | 5140 | CG  | LEU B 943 | 87.319 | 29.167 | 84.765 | 1.00 | 0.00 | C |
| ATOM | 5141 | CD1 | LEU B 943 | 88.051 | 28.041 | 85.509 | 1.00 | 0.00 | C |

|        |      |               |        |        |        |      |      |   |
|--------|------|---------------|--------|--------|--------|------|------|---|
| ATOM   | 5142 | CD2 LEU B 943 | 85.814 | 29.210 | 85.077 | 1.00 | 0.00 | C |
| ATOM   | 5143 | N ASP B 944   | 89.128 | 32.906 | 83.815 | 1.00 | 0.00 | N |
| ATOM   | 5144 | CA ASP B 944  | 89.478 | 34.300 | 83.601 | 1.00 | 0.00 | C |
| ATOM   | 5145 | C ASP B 944   | 88.637 | 35.259 | 84.437 | 1.00 | 0.00 | C |
| ATOM   | 5146 | O ASP B 944   | 87.958 | 34.834 | 85.372 | 1.00 | 0.00 | O |
| ATOM   | 5147 | CB ASP B 944  | 89.319 | 34.725 | 82.134 | 1.00 | 0.00 | C |
| ATOM   | 5148 | CG ASP B 944  | 90.342 | 33.946 | 81.317 | 1.00 | 0.00 | C |
| ATOM   | 5149 | OD1 ASP B 944 | 91.522 | 33.863 | 81.756 | 1.00 | 0.00 | O |
| ATOM   | 5150 | OD2 ASP B 944 | 89.957 | 33.425 | 80.235 | 1.00 | 0.00 | O |
| ATOM   | 5151 | N GLU B 945   | 88.709 | 36.598 | 84.140 | 1.00 | 0.00 | N |
| ATOM   | 5152 | CA GLU B 945  | 87.958 | 37.625 | 84.846 | 1.00 | 0.00 | C |
| ATOM   | 5153 | C GLU B 945   | 88.262 | 38.997 | 84.257 | 1.00 | 0.00 | C |
| ATOM   | 5154 | O GLU B 945   | 88.799 | 39.099 | 83.157 | 1.00 | 0.00 | O |
| ATOM   | 5155 | CB GLU B 945  | 88.253 | 37.653 | 86.355 | 1.00 | 0.00 | C |
| ATOM   | 5156 | CG GLU B 945  | 87.236 | 38.462 | 87.162 | 1.00 | 0.00 | C |
| ATOM   | 5157 | CD GLU B 945  | 87.603 | 38.350 | 88.633 | 1.00 | 0.00 | C |
| ATOM   | 5158 | OE1 GLU B 945 | 88.596 | 37.636 | 88.942 | 1.00 | 0.00 | O |
| ATOM   | 5159 | OE2 GLU B 945 | 86.897 | 38.969 | 89.470 | 1.00 | 0.00 | O |
| HETATM | 5160 | N HIE B 946   | 87.878 | 40.112 | 84.945 | 1.00 | 0.00 | N |
| HETATM | 5161 | CA HIE B 946  | 88.167 | 41.427 | 84.413 | 1.00 | 0.00 | C |
| HETATM | 5162 | C HIE B 946   | 88.805 | 42.269 | 85.478 | 1.00 | 0.00 | C |
| HETATM | 5163 | O HIE B 946   | 88.466 | 42.171 | 86.655 | 1.00 | 0.00 | O |
| HETATM | 5164 | CB HIE B 946  | 86.932 | 42.195 | 83.918 | 1.00 | 0.00 | C |
| HETATM | 5165 | CG HIE B 946  | 86.084 | 42.717 | 85.034 | 1.00 | 0.00 | C |
| HETATM | 5166 | CD2 HIE B 946 | 85.995 | 43.978 | 85.547 | 1.00 | 0.00 | C |
| HETATM | 5167 | ND1 HIE B 946 | 85.205 | 41.953 | 85.763 | 1.00 | 0.00 | N |
| HETATM | 5168 | CE1 HIE B 946 | 84.629 | 42.777 | 86.676 | 1.00 | 0.00 | C |
| HETATM | 5169 | NE2 HIE B 946 | 85.077 | 44.015 | 86.581 | 1.00 | 0.00 | N |
| ATOM   | 5170 | N ASN B 947   | 89.761 | 43.135 | 85.079 | 1.00 | 0.00 | N |
| ATOM   | 5171 | CA ASN B 947  | 90.444 | 43.960 | 86.037 | 1.00 | 0.00 | C |
| ATOM   | 5172 | C ASN B 947   | 90.767 | 45.270 | 85.398 | 1.00 | 0.00 | C |
| ATOM   | 5173 | O ASN B 947   | 90.282 | 45.606 | 84.322 | 1.00 | 0.00 | O |
| ATOM   | 5174 | CB ASN B 947  | 91.783 | 43.368 | 86.519 | 1.00 | 0.00 | C |
| ATOM   | 5175 | CG ASN B 947  | 91.492 | 42.137 | 87.367 | 1.00 | 0.00 | C |
| ATOM   | 5176 | ND2 ASN B 947 | 92.297 | 41.058 | 87.165 | 1.00 | 0.00 | N |
| ATOM   | 5177 | OD1 ASN B 947 | 90.577 | 42.130 | 88.186 | 1.00 | 0.00 | O |
| ATOM   | 5178 | N LEU B 948   | 91.592 | 46.062 | 86.105 | 1.00 | 0.00 | N |
| ATOM   | 5179 | CA LEU B 948  | 92.052 | 47.343 | 85.658 | 1.00 | 0.00 | C |
| ATOM   | 5180 | C LEU B 948   | 92.892 | 47.135 | 84.427 | 1.00 | 0.00 | C |
| ATOM   | 5181 | O LEU B 948   | 92.794 | 47.927 | 83.486 | 1.00 | 0.00 | O |
| ATOM   | 5182 | CB LEU B 948  | 92.947 | 48.030 | 86.704 | 1.00 | 0.00 | C |
| ATOM   | 5183 | CG LEU B 948  | 92.271 | 48.233 | 88.071 | 1.00 | 0.00 | C |
| ATOM   | 5184 | CD1 LEU B 948 | 93.228 | 48.922 | 89.048 | 1.00 | 0.00 | C |
| ATOM   | 5185 | CD2 LEU B 948 | 90.937 | 48.986 | 87.942 | 1.00 | 0.00 | C |

|      |      |     |           |        |        |        |      |      |   |
|------|------|-----|-----------|--------|--------|--------|------|------|---|
| ATOM | 5186 | N   | PRO B 949 | 93.714 | 46.111 | 84.379 | 1.00 | 0.00 | N |
| ATOM | 5187 | CA  | PRO B 949 | 94.523 | 45.918 | 83.206 | 1.00 | 0.00 | C |
| ATOM | 5188 | C   | PRO B 949 | 93.700 | 45.495 | 82.041 | 1.00 | 0.00 | C |
| ATOM | 5189 | O   | PRO B 949 | 92.585 | 45.012 | 82.238 | 1.00 | 0.00 | O |
| ATOM | 5190 | CB  | PRO B 949 | 95.596 | 44.901 | 83.592 | 1.00 | 0.00 | C |
| ATOM | 5191 | CG  | PRO B 949 | 95.777 | 45.129 | 85.102 | 1.00 | 0.00 | C |
| ATOM | 5192 | CD  | PRO B 949 | 94.403 | 45.634 | 85.573 | 1.00 | 0.00 | C |
| ATOM | 5193 | N   | ARG B 950 | 94.229 | 45.690 | 80.816 | 1.00 | 0.00 | N |
| ATOM | 5194 | CA  | ARG B 950 | 93.498 | 45.348 | 79.636 | 1.00 | 0.00 | C |
| ATOM | 5195 | C   | ARG B 950 | 93.945 | 44.001 | 79.165 | 1.00 | 0.00 | C |
| ATOM | 5196 | O   | ARG B 950 | 94.891 | 43.875 | 78.387 | 1.00 | 0.00 | O |
| ATOM | 5197 | CB  | ARG B 950 | 93.752 | 46.346 | 78.500 | 1.00 | 0.00 | C |
| ATOM | 5198 | CG  | ARG B 950 | 93.163 | 45.934 | 77.152 | 1.00 | 0.00 | C |
| ATOM | 5199 | CD  | ARG B 950 | 93.442 | 46.962 | 76.054 | 1.00 | 0.00 | C |
| ATOM | 5200 | NE  | ARG B 950 | 93.104 | 46.323 | 74.750 | 1.00 | 0.00 | N |
| ATOM | 5201 | CZ  | ARG B 950 | 91.813 | 46.303 | 74.318 | 1.00 | 0.00 | C |
| ATOM | 5202 | NH1 | ARG B 950 | 90.823 | 46.824 | 75.100 | 1.00 | 0.00 | N |
| ATOM | 5203 | NH2 | ARG B 950 | 91.510 | 45.758 | 73.105 | 1.00 | 0.00 | N |
| ATOM | 5204 | N   | PHE B 951 | 93.256 | 42.958 | 79.657 | 1.00 | 0.00 | N |
| ATOM | 5205 | CA  | PHE B 951 | 93.453 | 41.591 | 79.272 | 1.00 | 0.00 | C |
| ATOM | 5206 | C   | PHE B 951 | 92.962 | 41.419 | 77.856 | 1.00 | 0.00 | C |
| ATOM | 5207 | O   | PHE B 951 | 93.593 | 40.724 | 77.059 | 1.00 | 0.00 | O |
| ATOM | 5208 | CB  | PHE B 951 | 92.651 | 40.616 | 80.152 | 1.00 | 0.00 | C |
| ATOM | 5209 | CG  | PHE B 951 | 93.093 | 40.821 | 81.559 | 1.00 | 0.00 | C |
| ATOM | 5210 | CD1 | PHE B 951 | 94.192 | 40.163 | 82.055 | 1.00 | 0.00 | C |
| ATOM | 5211 | CD2 | PHE B 951 | 92.400 | 41.686 | 82.379 | 1.00 | 0.00 | C |
| ATOM | 5212 | CE1 | PHE B 951 | 94.592 | 40.363 | 83.356 | 1.00 | 0.00 | C |
| ATOM | 5213 | CE2 | PHE B 951 | 92.801 | 41.889 | 83.679 | 1.00 | 0.00 | C |
| ATOM | 5214 | CZ  | PHE B 951 | 93.898 | 41.224 | 84.169 | 1.00 | 0.00 | C |
| ATOM | 5215 | N   | PRO B 952 | 91.857 | 42.037 | 77.503 | 1.00 | 0.00 | N |
| ATOM | 5216 | CA  | PRO B 952 | 91.356 | 41.879 | 76.165 | 1.00 | 0.00 | C |
| ATOM | 5217 | C   | PRO B 952 | 92.282 | 42.450 | 75.151 | 1.00 | 0.00 | C |
| ATOM | 5218 | O   | PRO B 952 | 91.994 | 42.343 | 73.961 | 1.00 | 0.00 | O |
| ATOM | 5219 | CB  | PRO B 952 | 89.956 | 42.491 | 76.163 | 1.00 | 0.00 | C |
| ATOM | 5220 | CG  | PRO B 952 | 89.466 | 42.242 | 77.596 | 1.00 | 0.00 | C |
| ATOM | 5221 | CD  | PRO B 952 | 90.752 | 42.229 | 78.439 | 1.00 | 0.00 | C |
| ATOM | 5222 | N   | GLU B 953 | 93.381 | 43.085 | 75.574 | 1.00 | 0.00 | N |
| ATOM | 5223 | CA  | GLU B 953 | 94.278 | 43.606 | 74.589 | 1.00 | 0.00 | C |
| ATOM | 5224 | C   | GLU B 953 | 94.774 | 42.443 | 73.784 | 1.00 | 0.00 | C |
| ATOM | 5225 | O   | GLU B 953 | 94.920 | 42.540 | 72.569 | 1.00 | 0.00 | O |
| ATOM | 5226 | CB  | GLU B 953 | 95.495 | 44.312 | 75.204 | 1.00 | 0.00 | C |
| ATOM | 5227 | CG  | GLU B 953 | 96.319 | 45.117 | 74.192 | 1.00 | 0.00 | C |
| ATOM | 5228 | CD  | GLU B 953 | 97.127 | 44.152 | 73.338 | 1.00 | 0.00 | C |
| ATOM | 5229 | OE1 | GLU B 953 | 97.823 | 43.279 | 73.925 | 1.00 | 0.00 | O |

|      |      |     |     |   |     |        |        |        |      |      |   |
|------|------|-----|-----|---|-----|--------|--------|--------|------|------|---|
| ATOM | 5230 | OE2 | GLU | B | 953 | 97.055 | 44.269 | 72.086 | 1.00 | 0.00 | O |
| ATOM | 5231 | N   | TRP | B | 954 | 95.044 | 41.301 | 74.448 | 1.00 | 0.00 | N |
| ATOM | 5232 | CA  | TRP | B | 954 | 95.570 | 40.134 | 73.796 | 1.00 | 0.00 | C |
| ATOM | 5233 | C   | TRP | B | 954 | 94.606 | 39.591 | 72.785 | 1.00 | 0.00 | C |
| ATOM | 5234 | O   | TRP | B | 954 | 94.997 | 39.237 | 71.674 | 1.00 | 0.00 | O |
| ATOM | 5235 | CB  | TRP | B | 954 | 95.884 | 38.989 | 74.776 | 1.00 | 0.00 | C |
| ATOM | 5236 | CG  | TRP | B | 954 | 96.235 | 37.689 | 74.091 | 1.00 | 0.00 | C |
| ATOM | 5237 | CD1 | TRP | B | 954 | 95.464 | 36.581 | 73.909 | 1.00 | 0.00 | C |
| ATOM | 5238 | CD2 | TRP | B | 954 | 97.496 | 37.416 | 73.456 | 1.00 | 0.00 | C |
| ATOM | 5239 | CE2 | TRP | B | 954 | 97.414 | 36.133 | 72.918 | 1.00 | 0.00 | C |
| ATOM | 5240 | CE3 | TRP | B | 954 | 98.621 | 38.175 | 73.327 | 1.00 | 0.00 | C |
| ATOM | 5241 | NE1 | TRP | B | 954 | 96.163 | 35.628 | 73.206 | 1.00 | 0.00 | N |
| ATOM | 5242 | CZ2 | TRP | B | 954 | 98.463 | 35.583 | 72.239 | 1.00 | 0.00 | C |
| ATOM | 5243 | CZ3 | TRP | B | 954 | 99.682 | 37.618 | 72.646 | 1.00 | 0.00 | C |
| ATOM | 5244 | CH2 | TRP | B | 954 | 99.602 | 36.346 | 72.113 | 1.00 | 0.00 | C |
| ATOM | 5245 | N   | ILE | B | 955 | 93.308 | 39.543 | 73.131 | 1.00 | 0.00 | N |
| ATOM | 5246 | CA  | ILE | B | 955 | 92.309 | 38.945 | 72.290 | 1.00 | 0.00 | C |
| ATOM | 5247 | C   | ILE | B | 955 | 92.263 | 39.672 | 70.987 | 1.00 | 0.00 | C |
| ATOM | 5248 | O   | ILE | B | 955 | 91.898 | 39.100 | 69.964 | 1.00 | 0.00 | O |
| ATOM | 5249 | CB  | ILE | B | 955 | 90.917 | 38.954 | 72.859 | 1.00 | 0.00 | C |
| ATOM | 5250 | CG1 | ILE | B | 955 | 90.360 | 40.379 | 72.983 | 1.00 | 0.00 | C |
| ATOM | 5251 | CG2 | ILE | B | 955 | 90.957 | 38.185 | 74.188 | 1.00 | 0.00 | C |
| ATOM | 5252 | CD1 | ILE | B | 955 | 88.858 | 40.418 | 73.256 | 1.00 | 0.00 | C |
| ATOM | 5253 | N   | THR | B | 956 | 92.635 | 40.964 | 70.993 | 1.00 | 0.00 | N |
| ATOM | 5254 | CA  | THR | B | 956 | 92.490 | 41.799 | 69.839 | 1.00 | 0.00 | C |
| ATOM | 5255 | C   | THR | B | 956 | 93.149 | 41.164 | 68.661 | 1.00 | 0.00 | C |
| ATOM | 5256 | O   | THR | B | 956 | 92.642 | 41.305 | 67.553 | 1.00 | 0.00 | O |
| ATOM | 5257 | CB  | THR | B | 956 | 93.116 | 43.152 | 69.999 | 1.00 | 0.00 | C |
| ATOM | 5258 | CG2 | THR | B | 956 | 92.569 | 43.794 | 71.286 | 1.00 | 0.00 | C |
| ATOM | 5259 | OG1 | THR | B | 956 | 94.529 | 43.036 | 70.071 | 1.00 | 0.00 | O |
| ATOM | 5260 | N   | ILE | B | 957 | 94.286 | 40.468 | 68.820 | 1.00 | 0.00 | N |
| ATOM | 5261 | CA  | ILE | B | 957 | 94.852 | 39.927 | 67.618 | 1.00 | 0.00 | C |
| ATOM | 5262 | C   | ILE | B | 957 | 93.908 | 38.946 | 66.970 | 1.00 | 0.00 | C |
| ATOM | 5263 | O   | ILE | B | 957 | 93.778 | 39.007 | 65.747 | 1.00 | 0.00 | O |
| ATOM | 5264 | CB  | ILE | B | 957 | 96.293 | 39.451 | 67.730 | 1.00 | 0.00 | C |
| ATOM | 5265 | CG1 | ILE | B | 957 | 96.547 | 38.382 | 68.807 | 1.00 | 0.00 | C |
| ATOM | 5266 | CG2 | ILE | B | 957 | 97.152 | 40.708 | 67.928 | 1.00 | 0.00 | C |
| ATOM | 5267 | CD1 | ILE | B | 957 | 97.933 | 37.742 | 68.718 | 1.00 | 0.00 | C |
| ATOM | 5268 | N   | PRO | B | 958 | 93.219 | 38.047 | 67.635 | 1.00 | 0.00 | N |
| ATOM | 5269 | CA  | PRO | B | 958 | 92.263 | 37.254 | 66.910 | 1.00 | 0.00 | C |
| ATOM | 5270 | C   | PRO | B | 958 | 91.106 | 38.113 | 66.523 | 1.00 | 0.00 | C |
| ATOM | 5271 | O   | PRO | B | 958 | 90.399 | 37.782 | 65.569 | 1.00 | 0.00 | O |
| ATOM | 5272 | CB  | PRO | B | 958 | 91.879 | 36.099 | 67.831 | 1.00 | 0.00 | C |
| ATOM | 5273 | CG  | PRO | B | 958 | 93.124 | 35.917 | 68.715 | 1.00 | 0.00 | C |

|      |      |     |     |   |     |        |        |        |      |      |   |
|------|------|-----|-----|---|-----|--------|--------|--------|------|------|---|
| ATOM | 5274 | CD  | PRO | B | 958 | 93.742 | 37.320 | 68.785 | 1.00 | 0.00 | C |
| ATOM | 5275 | N   | LEU | B | 959 | 90.894 | 39.217 | 67.263 | 1.00 | 0.00 | N |
| ATOM | 5276 | CA  | LEU | B | 959 | 89.808 | 40.112 | 67.018 | 1.00 | 0.00 | C |
| ATOM | 5277 | C   | LEU | B | 959 | 90.049 | 40.698 | 65.666 | 1.00 | 0.00 | C |
| ATOM | 5278 | O   | LEU | B | 959 | 89.117 | 40.957 | 64.906 | 1.00 | 0.00 | O |
| ATOM | 5279 | CB  | LEU | B | 959 | 89.734 | 41.248 | 68.053 | 1.00 | 0.00 | C |
| ATOM | 5280 | CG  | LEU | B | 959 | 88.475 | 42.132 | 67.937 | 1.00 | 0.00 | C |
| ATOM | 5281 | CD1 | LEU | B | 959 | 88.474 | 42.981 | 66.659 | 1.00 | 0.00 | C |
| ATOM | 5282 | CD2 | LEU | B | 959 | 87.198 | 41.293 | 68.103 | 1.00 | 0.00 | C |
| ATOM | 5283 | N   | VAL | B | 960 | 91.335 | 40.907 | 65.340 | 1.00 | 0.00 | N |
| ATOM | 5284 | CA  | VAL | B | 960 | 91.749 | 41.464 | 64.091 | 1.00 | 0.00 | C |
| ATOM | 5285 | C   | VAL | B | 960 | 91.210 | 40.564 | 63.039 | 1.00 | 0.00 | C |
| ATOM | 5286 | O   | VAL | B | 960 | 90.675 | 41.018 | 62.030 | 1.00 | 0.00 | O |
| ATOM | 5287 | CB  | VAL | B | 960 | 93.248 | 41.466 | 63.956 | 1.00 | 0.00 | C |
| ATOM | 5288 | CG1 | VAL | B | 960 | 93.633 | 41.840 | 62.515 | 1.00 | 0.00 | C |
| ATOM | 5289 | CG2 | VAL | B | 960 | 93.828 | 42.406 | 65.026 | 1.00 | 0.00 | C |
| ATOM | 5290 | N   | CYS | B | 961 | 91.327 | 39.247 | 63.271 | 1.00 | 0.00 | N |
| ATOM | 5291 | CA  | CYS | B | 961 | 90.836 | 38.299 | 62.324 | 1.00 | 0.00 | C |
| ATOM | 5292 | C   | CYS | B | 961 | 89.361 | 38.488 | 62.211 | 1.00 | 0.00 | C |
| ATOM | 5293 | O   | CYS | B | 961 | 88.790 | 38.408 | 61.123 | 1.00 | 0.00 | O |
| ATOM | 5294 | CB  | CYS | B | 961 | 91.084 | 36.845 | 62.751 | 1.00 | 0.00 | C |
| ATOM | 5295 | SG  | CYS | B | 961 | 90.454 | 35.653 | 61.531 | 1.00 | 0.00 | S |
| ATOM | 5296 | N   | ILE | B | 962 | 88.701 | 38.768 | 63.348 | 1.00 | 0.00 | N |
| ATOM | 5297 | CA  | ILE | B | 962 | 87.271 | 38.878 | 63.386 | 1.00 | 0.00 | C |
| ATOM | 5298 | C   | ILE | B | 962 | 86.813 | 39.996 | 62.501 | 1.00 | 0.00 | C |
| ATOM | 5299 | O   | ILE | B | 962 | 85.888 | 39.824 | 61.711 | 1.00 | 0.00 | O |
| ATOM | 5300 | CB  | ILE | B | 962 | 86.756 | 39.205 | 64.757 | 1.00 | 0.00 | C |
| ATOM | 5301 | CG1 | ILE | B | 962 | 87.187 | 38.138 | 65.776 | 1.00 | 0.00 | C |
| ATOM | 5302 | CG2 | ILE | B | 962 | 85.232 | 39.371 | 64.654 | 1.00 | 0.00 | C |
| ATOM | 5303 | CD1 | ILE | B | 962 | 86.643 | 36.746 | 65.474 | 1.00 | 0.00 | C |
| ATOM | 5304 | N   | TYR | B | 963 | 87.470 | 41.168 | 62.588 | 1.00 | 0.00 | N |
| ATOM | 5305 | CA  | TYR | B | 963 | 86.970 | 42.301 | 61.867 | 1.00 | 0.00 | C |
| ATOM | 5306 | C   | TYR | B | 963 | 87.035 | 42.060 | 60.397 | 1.00 | 0.00 | C |
| ATOM | 5307 | O   | TYR | B | 963 | 86.162 | 42.511 | 59.659 | 1.00 | 0.00 | O |
| ATOM | 5308 | CB  | TYR | B | 963 | 87.639 | 43.656 | 62.191 | 1.00 | 0.00 | C |
| ATOM | 5309 | CG  | TYR | B | 963 | 89.050 | 43.715 | 61.723 | 1.00 | 0.00 | C |
| ATOM | 5310 | CD1 | TYR | B | 963 | 89.350 | 43.883 | 60.391 | 1.00 | 0.00 | C |
| ATOM | 5311 | CD2 | TYR | B | 963 | 90.076 | 43.645 | 62.634 | 1.00 | 0.00 | C |
| ATOM | 5312 | CE1 | TYR | B | 963 | 90.657 | 43.952 | 59.970 | 1.00 | 0.00 | C |
| ATOM | 5313 | CE2 | TYR | B | 963 | 91.385 | 43.716 | 62.221 | 1.00 | 0.00 | C |
| ATOM | 5314 | CZ  | TYR | B | 963 | 91.678 | 43.864 | 60.887 | 1.00 | 0.00 | C |
| ATOM | 5315 | OH  | TYR | B | 963 | 93.022 | 43.937 | 60.467 | 1.00 | 0.00 | O |
| ATOM | 5316 | N   | MET | B | 964 | 88.059 | 41.331 | 59.925 | 1.00 | 0.00 | N |
| ATOM | 5317 | CA  | MET | B | 964 | 88.222 | 41.160 | 58.509 | 1.00 | 0.00 | C |

|      |      |     |           |        |        |        |      |      |   |
|------|------|-----|-----------|--------|--------|--------|------|------|---|
| ATOM | 5318 | C   | MET B 964 | 86.979 | 40.539 | 57.944 | 1.00 | 0.00 | C |
| ATOM | 5319 | O   | MET B 964 | 86.499 | 40.947 | 56.889 | 1.00 | 0.00 | O |
| ATOM | 5320 | CB  | MET B 964 | 89.373 | 40.206 | 58.151 | 1.00 | 0.00 | C |
| ATOM | 5321 | CG  | MET B 964 | 90.756 | 40.702 | 58.586 | 1.00 | 0.00 | C |
| ATOM | 5322 | SD  | MET B 964 | 92.104 | 39.532 | 58.238 | 1.00 | 0.00 | S |
| ATOM | 5323 | CE  | MET B 964 | 91.560 | 38.302 | 59.461 | 1.00 | 0.00 | C |
| ATOM | 5324 | N   | LEU B 965 | 86.412 | 39.534 | 58.629 | 1.00 | 0.00 | N |
| ATOM | 5325 | CA  | LEU B 965 | 85.255 | 38.900 | 58.070 | 1.00 | 0.00 | C |
| ATOM | 5326 | C   | LEU B 965 | 84.155 | 39.916 | 58.006 | 1.00 | 0.00 | C |
| ATOM | 5327 | O   | LEU B 965 | 83.467 | 40.033 | 56.993 | 1.00 | 0.00 | O |
| ATOM | 5328 | CB  | LEU B 965 | 84.789 | 37.694 | 58.914 | 1.00 | 0.00 | C |
| ATOM | 5329 | CG  | LEU B 965 | 83.720 | 36.770 | 58.276 | 1.00 | 0.00 | C |
| ATOM | 5330 | CD1 | LEU B 965 | 83.365 | 35.621 | 59.233 | 1.00 | 0.00 | C |
| ATOM | 5331 | CD2 | LEU B 965 | 82.464 | 37.522 | 57.803 | 1.00 | 0.00 | C |
| ATOM | 5332 | N   | SER B 966 | 83.972 | 40.699 | 59.085 | 1.00 | 0.00 | N |
| ATOM | 5333 | CA  | SER B 966 | 82.884 | 41.633 | 59.131 | 1.00 | 0.00 | C |
| ATOM | 5334 | C   | SER B 966 | 83.059 | 42.669 | 58.069 | 1.00 | 0.00 | C |
| ATOM | 5335 | O   | SER B 966 | 82.130 | 42.979 | 57.328 | 1.00 | 0.00 | O |
| ATOM | 5336 | CB  | SER B 966 | 82.772 | 42.363 | 60.479 | 1.00 | 0.00 | C |
| ATOM | 5337 | OG  | SER B 966 | 83.895 | 43.206 | 60.680 | 1.00 | 0.00 | O |
| ATOM | 5338 | N   | THR B 967 | 84.279 | 43.210 | 57.949 | 1.00 | 0.00 | N |
| ATOM | 5339 | CA  | THR B 967 | 84.516 | 44.257 | 57.007 | 1.00 | 0.00 | C |
| ATOM | 5340 | C   | THR B 967 | 84.260 | 43.751 | 55.629 | 1.00 | 0.00 | C |
| ATOM | 5341 | O   | THR B 967 | 83.638 | 44.430 | 54.814 | 1.00 | 0.00 | O |
| ATOM | 5342 | CB  | THR B 967 | 85.924 | 44.781 | 57.078 | 1.00 | 0.00 | C |
| ATOM | 5343 | CG2 | THR B 967 | 86.927 | 43.651 | 56.815 | 1.00 | 0.00 | C |
| ATOM | 5344 | OG1 | THR B 967 | 86.094 | 45.812 | 56.125 | 1.00 | 0.00 | O |
| ATOM | 5345 | N   | ASN B 968 | 84.697 | 42.516 | 55.339 | 1.00 | 0.00 | N |
| ATOM | 5346 | CA  | ASN B 968 | 84.563 | 42.031 | 54.002 | 1.00 | 0.00 | C |
| ATOM | 5347 | C   | ASN B 968 | 83.120 | 42.009 | 53.614 | 1.00 | 0.00 | C |
| ATOM | 5348 | O   | ASN B 968 | 82.769 | 42.403 | 52.503 | 1.00 | 0.00 | O |
| ATOM | 5349 | CB  | ASN B 968 | 85.122 | 40.610 | 53.817 | 1.00 | 0.00 | C |
| ATOM | 5350 | CG  | ASN B 968 | 85.085 | 40.303 | 52.326 | 1.00 | 0.00 | C |
| ATOM | 5351 | ND2 | ASN B 968 | 86.230 | 40.544 | 51.626 | 1.00 | 0.00 | N |
| ATOM | 5352 | OD1 | ASN B 968 | 84.064 | 39.876 | 51.792 | 1.00 | 0.00 | O |
| ATOM | 5353 | N   | ILE B 969 | 82.240 | 41.561 | 54.521 | 1.00 | 0.00 | N |
| ATOM | 5354 | CA  | ILE B 969 | 80.868 | 41.463 | 54.132 | 1.00 | 0.00 | C |
| ATOM | 5355 | C   | ILE B 969 | 80.371 | 42.852 | 53.878 | 1.00 | 0.00 | C |
| ATOM | 5356 | O   | ILE B 969 | 79.566 | 43.086 | 52.982 | 1.00 | 0.00 | O |
| ATOM | 5357 | CB  | ILE B 969 | 79.970 | 40.839 | 55.141 | 1.00 | 0.00 | C |
| ATOM | 5358 | CG1 | ILE B 969 | 80.594 | 39.588 | 55.774 | 1.00 | 0.00 | C |
| ATOM | 5359 | CG2 | ILE B 969 | 78.765 | 40.433 | 54.293 | 1.00 | 0.00 | C |
| ATOM | 5360 | CD1 | ILE B 969 | 79.835 | 39.103 | 57.008 | 1.00 | 0.00 | C |
| ATOM | 5361 | N   | LEU B 970 | 80.825 | 43.827 | 54.682 | 1.00 | 0.00 | N |



|      |      |     |           |        |        |        |      |      |   |
|------|------|-----|-----------|--------|--------|--------|------|------|---|
| ATOM | 5362 | CA  | LEU B 970 | 80.341 | 45.154 | 54.468 | 1.00 | 0.00 | C |
| ATOM | 5363 | C   | LEU B 970 | 80.703 | 45.589 | 53.088 | 1.00 | 0.00 | C |
| ATOM | 5364 | O   | LEU B 970 | 79.862 | 46.127 | 52.373 | 1.00 | 0.00 | O |
| ATOM | 5365 | CB  | LEU B 970 | 80.922 | 46.186 | 55.448 | 1.00 | 0.00 | C |
| ATOM | 5366 | CG  | LEU B 970 | 80.495 | 47.622 | 55.094 | 1.00 | 0.00 | C |
| ATOM | 5367 | CD1 | LEU B 970 | 78.967 | 47.764 | 55.054 | 1.00 | 0.00 | C |
| ATOM | 5368 | CD2 | LEU B 970 | 81.154 | 48.631 | 56.037 | 1.00 | 0.00 | C |
| ATOM | 5369 | N   | LEU B 971 | 81.950 | 45.345 | 52.650 | 1.00 | 0.00 | N |
| ATOM | 5370 | CA  | LEU B 971 | 82.299 | 45.786 | 51.333 | 1.00 | 0.00 | C |
| ATOM | 5371 | C   | LEU B 971 | 81.438 | 45.076 | 50.343 | 1.00 | 0.00 | C |
| ATOM | 5372 | O   | LEU B 971 | 80.904 | 45.702 | 49.430 | 1.00 | 0.00 | O |
| ATOM | 5373 | CB  | LEU B 971 | 83.769 | 45.534 | 50.950 | 1.00 | 0.00 | C |
| ATOM | 5374 | CG  | LEU B 971 | 84.763 | 46.484 | 51.644 | 1.00 | 0.00 | C |
| ATOM | 5375 | CD1 | LEU B 971 | 84.726 | 46.339 | 53.171 | 1.00 | 0.00 | C |
| ATOM | 5376 | CD2 | LEU B 971 | 86.178 | 46.320 | 51.068 | 1.00 | 0.00 | C |
| ATOM | 5377 | N   | VAL B 972 | 81.237 | 43.755 | 50.509 | 1.00 | 0.00 | N |
| ATOM | 5378 | CA  | VAL B 972 | 80.457 | 43.049 | 49.534 | 1.00 | 0.00 | C |
| ATOM | 5379 | C   | VAL B 972 | 79.094 | 43.646 | 49.547 | 1.00 | 0.00 | C |
| ATOM | 5380 | O   | VAL B 972 | 78.417 | 43.720 | 48.523 | 1.00 | 0.00 | O |
| ATOM | 5381 | CB  | VAL B 972 | 80.345 | 41.562 | 49.764 | 1.00 | 0.00 | C |
| ATOM | 5382 | CG1 | VAL B 972 | 79.419 | 41.269 | 50.954 | 1.00 | 0.00 | C |
| ATOM | 5383 | CG2 | VAL B 972 | 79.866 | 40.914 | 48.456 | 1.00 | 0.00 | C |
| ATOM | 5384 | N   | ASN B 973 | 78.657 | 44.104 | 50.729 | 1.00 | 0.00 | N |
| ATOM | 5385 | CA  | ASN B 973 | 77.365 | 44.703 | 50.847 | 1.00 | 0.00 | C |
| ATOM | 5386 | C   | ASN B 973 | 77.307 | 45.892 | 49.937 | 1.00 | 0.00 | C |
| ATOM | 5387 | O   | ASN B 973 | 76.347 | 46.048 | 49.182 | 1.00 | 0.00 | O |
| ATOM | 5388 | CB  | ASN B 973 | 77.097 | 45.205 | 52.274 | 1.00 | 0.00 | C |
| ATOM | 5389 | CG  | ASN B 973 | 75.687 | 45.776 | 52.342 | 1.00 | 0.00 | C |
| ATOM | 5390 | ND2 | ASN B 973 | 75.301 | 46.273 | 53.548 | 1.00 | 0.00 | N |
| ATOM | 5391 | OD1 | ASN B 973 | 74.956 | 45.791 | 51.354 | 1.00 | 0.00 | O |
| ATOM | 5392 | N   | LEU B 974 | 78.339 | 46.762 | 49.980 | 1.00 | 0.00 | N |
| ATOM | 5393 | CA  | LEU B 974 | 78.390 | 47.968 | 49.193 | 1.00 | 0.00 | C |
| ATOM | 5394 | C   | LEU B 974 | 78.535 | 47.693 | 47.726 | 1.00 | 0.00 | C |
| ATOM | 5395 | O   | LEU B 974 | 77.869 | 48.328 | 46.914 | 1.00 | 0.00 | O |
| ATOM | 5396 | CB  | LEU B 974 | 79.540 | 48.909 | 49.590 | 1.00 | 0.00 | C |
| ATOM | 5397 | CG  | LEU B 974 | 79.310 | 49.685 | 50.905 | 1.00 | 0.00 | C |
| ATOM | 5398 | CD1 | LEU B 974 | 79.111 | 48.745 | 52.099 | 1.00 | 0.00 | C |
| ATOM | 5399 | CD2 | LEU B 974 | 80.429 | 50.713 | 51.139 | 1.00 | 0.00 | C |
| ATOM | 5400 | N   | LEU B 975 | 79.385 | 46.721 | 47.347 | 1.00 | 0.00 | N |
| ATOM | 5401 | CA  | LEU B 975 | 79.717 | 46.492 | 45.967 | 1.00 | 0.00 | C |
| ATOM | 5402 | C   | LEU B 975 | 78.513 | 46.171 | 45.144 | 1.00 | 0.00 | C |
| ATOM | 5403 | O   | LEU B 975 | 78.440 | 46.578 | 43.985 | 1.00 | 0.00 | O |
| ATOM | 5404 | CB  | LEU B 975 | 80.724 | 45.347 | 45.740 | 1.00 | 0.00 | C |
| ATOM | 5405 | CG  | LEU B 975 | 82.210 | 45.724 | 45.916 | 1.00 | 0.00 | C |

|      |      |               |        |        |        |      |      |   |
|------|------|---------------|--------|--------|--------|------|------|---|
| ATOM | 5406 | CD1 LEU B 975 | 82.662 | 46.671 | 44.794 | 1.00 | 0.00 | C |
| ATOM | 5407 | CD2 LEU B 975 | 82.526 | 46.277 | 47.309 | 1.00 | 0.00 | C |
| ATOM | 5408 | N VAL B 976   | 77.529 | 45.450 | 45.705 | 1.00 | 0.00 | N |
| ATOM | 5409 | CA VAL B 976  | 76.442 | 45.013 | 44.879 | 1.00 | 0.00 | C |
| ATOM | 5410 | C VAL B 976   | 75.739 | 46.173 | 44.234 | 1.00 | 0.00 | C |
| ATOM | 5411 | O VAL B 976   | 75.377 | 46.094 | 43.062 | 1.00 | 0.00 | O |
| ATOM | 5412 | CB VAL B 976  | 75.406 | 44.212 | 45.601 | 1.00 | 0.00 | C |
| ATOM | 5413 | CG1 VAL B 976 | 74.319 | 43.844 | 44.576 | 1.00 | 0.00 | C |
| ATOM | 5414 | CG2 VAL B 976 | 76.082 | 42.994 | 46.252 | 1.00 | 0.00 | C |
| ATOM | 5415 | N ALA B 977   | 75.512 | 47.286 | 44.959 | 1.00 | 0.00 | N |
| ATOM | 5416 | CA ALA B 977  | 74.813 | 48.383 | 44.342 | 1.00 | 0.00 | C |
| ATOM | 5417 | C ALA B 977   | 75.685 | 48.950 | 43.235 | 1.00 | 0.00 | C |
| ATOM | 5418 | O ALA B 977   | 76.905 | 48.808 | 43.310 | 1.00 | 0.00 | O |
| ATOM | 5419 | CB ALA B 977  | 74.479 | 49.520 | 45.321 | 1.00 | 0.00 | C |
| ATOM | 5420 | N MET B 978   | 75.587 | 49.653 | 43.127 | 1.00 | 0.00 | N |
| ATOM | 5421 | CA MET B 978  | 76.354 | 50.264 | 42.058 | 1.00 | 0.00 | C |
| ATOM | 5422 | C MET B 978   | 77.134 | 51.346 | 42.714 | 1.00 | 0.00 | C |
| ATOM | 5423 | O MET B 978   | 76.594 | 52.111 | 43.512 | 1.00 | 0.00 | O |
| ATOM | 5424 | CB MET B 978  | 75.511 | 50.934 | 40.961 | 1.00 | 0.00 | C |
| ATOM | 5425 | CG MET B 978  | 74.696 | 49.948 | 40.128 | 1.00 | 0.00 | C |
| ATOM | 5426 | SD MET B 978  | 73.328 | 49.175 | 41.036 | 1.00 | 0.00 | S |
| ATOM | 5427 | CE MET B 978  | 72.736 | 48.167 | 39.650 | 1.00 | 0.00 | C |
| ATOM | 5428 | N PHE B 979   | 78.434 | 51.446 | 42.395 | 1.00 | 0.00 | N |
| ATOM | 5429 | CA PHE B 979  | 79.189 | 52.432 | 43.100 | 1.00 | 0.00 | C |
| ATOM | 5430 | C PHE B 979   | 79.675 | 53.430 | 42.117 | 1.00 | 0.00 | C |
| ATOM | 5431 | O PHE B 979   | 80.066 | 53.088 | 41.001 | 1.00 | 0.00 | O |
| ATOM | 5432 | CB PHE B 979  | 80.420 | 51.863 | 43.826 | 1.00 | 0.00 | C |
| ATOM | 5433 | CG PHE B 979  | 80.936 | 52.925 | 44.726 | 1.00 | 0.00 | C |
| ATOM | 5434 | CD1 PHE B 979 | 80.421 | 53.066 | 45.994 | 1.00 | 0.00 | C |
| ATOM | 5435 | CD2 PHE B 979 | 81.925 | 53.786 | 44.309 | 1.00 | 0.00 | C |
| ATOM | 5436 | CE1 PHE B 979 | 80.888 | 54.045 | 46.836 | 1.00 | 0.00 | C |
| ATOM | 5437 | CE2 PHE B 979 | 82.394 | 54.771 | 45.148 | 1.00 | 0.00 | C |
| ATOM | 5438 | CZ PHE B 979  | 81.877 | 54.902 | 46.415 | 1.00 | 0.00 | C |
| ATOM | 5439 | N GLY B 980   | 79.640 | 54.715 | 42.518 | 1.00 | 0.00 | N |
| ATOM | 5440 | CA GLY B 980  | 80.126 | 55.751 | 41.665 | 1.00 | 0.00 | C |
| ATOM | 5441 | C GLY B 980   | 79.369 | 55.670 | 40.389 | 1.00 | 0.00 | C |
| ATOM | 5442 | O GLY B 980   | 78.142 | 55.573 | 40.374 | 1.00 | 0.00 | O |
| ATOM | 5443 | N TYR B 981   | 80.116 | 55.685 | 39.272 | 1.00 | 0.00 | N |
| ATOM | 5444 | CA TYR B 981  | 79.518 | 55.635 | 37.979 | 1.00 | 0.00 | C |
| ATOM | 5445 | C TYR B 981   | 79.997 | 54.366 | 37.362 | 1.00 | 0.00 | C |
| ATOM | 5446 | O TYR B 981   | 81.162 | 53.998 | 37.503 | 1.00 | 0.00 | O |
| ATOM | 5447 | CB TYR B 981  | 79.993 | 56.790 | 37.081 | 1.00 | 0.00 | C |
| ATOM | 5448 | CG TYR B 981  | 79.187 | 56.797 | 35.832 | 1.00 | 0.00 | C |
| ATOM | 5449 | CD1 TYR B 981 | 77.954 | 57.401 | 35.818 | 1.00 | 0.00 | C |

|      |      |               |        |        |        |      |      |   |
|------|------|---------------|--------|--------|--------|------|------|---|
| ATOM | 5450 | CD2 TYR B 981 | 79.664 | 56.222 | 34.678 | 1.00 | 0.00 | C |
| ATOM | 5451 | CE1 TYR B 981 | 77.195 | 57.425 | 34.675 | 1.00 | 0.00 | C |
| ATOM | 5452 | CE2 TYR B 981 | 78.910 | 56.243 | 33.527 | 1.00 | 0.00 | C |
| ATOM | 5453 | CZ TYR B 981  | 77.675 | 56.845 | 33.526 | 1.00 | 0.00 | C |
| ATOM | 5454 | OH TYR B 981  | 76.897 | 56.870 | 32.350 | 1.00 | 0.00 | O |
| ATOM | 5455 | N THR B 982   | 79.093 | 53.641 | 36.679 | 1.00 | 0.00 | N |
| ATOM | 5456 | CA THR B 982  | 79.492 | 52.411 | 36.070 | 1.00 | 0.00 | C |
| ATOM | 5457 | C THR B 982   | 80.473 | 52.722 | 35.003 | 1.00 | 0.00 | C |
| ATOM | 5458 | O THR B 982   | 80.235 | 53.576 | 34.150 | 1.00 | 0.00 | O |
| ATOM | 5459 | CB THR B 982  | 78.362 | 51.666 | 35.424 | 1.00 | 0.00 | C |
| ATOM | 5460 | CG2 THR B 982 | 78.913 | 50.454 | 34.662 | 1.00 | 0.00 | C |
| ATOM | 5461 | OG1 THR B 982 | 77.424 | 51.257 | 36.403 | 1.00 | 0.00 | O |
| ATOM | 5462 | N VAL B 983   | 81.618 | 52.021 | 35.034 | 1.00 | 0.00 | N |
| ATOM | 5463 | CA VAL B 983  | 82.630 | 52.231 | 34.050 | 1.00 | 0.00 | C |
| ATOM | 5464 | C VAL B 983   | 83.109 | 50.886 | 33.622 | 1.00 | 0.00 | C |
| ATOM | 5465 | O VAL B 983   | 82.973 | 49.904 | 34.351 | 1.00 | 0.00 | O |
| ATOM | 5466 | CB VAL B 983  | 83.824 | 52.967 | 34.577 | 1.00 | 0.00 | C |
| ATOM | 5467 | CG1 VAL B 983 | 83.384 | 54.383 | 34.991 | 1.00 | 0.00 | C |
| ATOM | 5468 | CG2 VAL B 983 | 84.431 | 52.143 | 35.720 | 1.00 | 0.00 | C |
| ATOM | 5469 | N GLY B 984   | 83.664 | 50.813 | 32.398 | 1.00 | 0.00 | N |
| ATOM | 5470 | CA GLY B 984  | 84.192 | 49.581 | 31.897 | 1.00 | 0.00 | C |
| ATOM | 5471 | C GLY B 984   | 83.123 | 48.919 | 31.096 | 1.00 | 0.00 | C |
| ATOM | 5472 | O GLY B 984   | 81.935 | 49.057 | 31.382 | 1.00 | 0.00 | O |
| ATOM | 5473 | N THR B 985   | 83.540 | 48.169 | 30.059 | 1.00 | 0.00 | N |
| ATOM | 5474 | CA THR B 985  | 82.615 | 47.463 | 29.225 | 1.00 | 0.00 | C |
| ATOM | 5475 | C THR B 985   | 81.973 | 46.404 | 30.054 | 1.00 | 0.00 | C |
| ATOM | 5476 | O THR B 985   | 80.766 | 46.175 | 29.964 | 1.00 | 0.00 | O |
| ATOM | 5477 | CB THR B 985  | 83.272 | 46.769 | 28.071 | 1.00 | 0.00 | C |
| ATOM | 5478 | CG2 THR B 985 | 82.195 | 46.009 | 27.282 | 1.00 | 0.00 | C |
| ATOM | 5479 | OG1 THR B 985 | 83.925 | 47.717 | 27.238 | 1.00 | 0.00 | O |
| ATOM | 5480 | N VAL B 986   | 82.775 | 45.744 | 30.909 | 1.00 | 0.00 | N |
| ATOM | 5481 | CA VAL B 986  | 82.261 | 44.669 | 31.699 | 1.00 | 0.00 | C |
| ATOM | 5482 | C VAL B 986   | 81.149 | 45.202 | 32.533 | 1.00 | 0.00 | C |
| ATOM | 5483 | O VAL B 986   | 80.063 | 44.625 | 32.580 | 1.00 | 0.00 | O |
| ATOM | 5484 | CB VAL B 986  | 83.294 | 44.103 | 32.634 | 1.00 | 0.00 | C |
| ATOM | 5485 | CG1 VAL B 986 | 82.625 | 43.044 | 33.525 | 1.00 | 0.00 | C |
| ATOM | 5486 | CG2 VAL B 986 | 84.475 | 43.575 | 31.803 | 1.00 | 0.00 | C |
| ATOM | 5487 | N GLN B 987   | 81.379 | 46.345 | 33.201 | 1.00 | 0.00 | N |
| ATOM | 5488 | CA GLN B 987  | 80.338 | 46.854 | 34.038 | 1.00 | 0.00 | C |
| ATOM | 5489 | C GLN B 987   | 79.335 | 47.494 | 33.140 | 1.00 | 0.00 | C |
| ATOM | 5490 | O GLN B 987   | 79.683 | 48.271 | 32.250 | 1.00 | 0.00 | O |
| ATOM | 5491 | CB GLN B 987  | 80.848 | 47.883 | 35.061 | 1.00 | 0.00 | C |
| ATOM | 5492 | CG GLN B 987  | 79.887 | 48.153 | 36.219 | 1.00 | 0.00 | C |
| ATOM | 5493 | CD GLN B 987  | 80.600 | 49.093 | 37.181 | 1.00 | 0.00 | C |

|      |      |     |     |   |     |        |        |        |      |      |   |
|------|------|-----|-----|---|-----|--------|--------|--------|------|------|---|
| ATOM | 5494 | NE2 | GLN | B | 987 | 81.914 | 48.829 | 37.417 | 1.00 | 0.00 | N |
| ATOM | 5495 | OE1 | GLN | B | 987 | 80.006 | 50.028 | 37.715 | 1.00 | 0.00 | O |
| ATOM | 5496 | N   | GLU | B | 988 | 78.045 | 47.161 | 33.334 | 1.00 | 0.00 | N |
| ATOM | 5497 | CA  | GLU | B | 988 | 77.041 | 47.729 | 32.489 | 1.00 | 0.00 | C |
| ATOM | 5498 | C   | GLU | B | 988 | 75.878 | 48.086 | 33.354 | 1.00 | 0.00 | C |
| ATOM | 5499 | O   | GLU | B | 988 | 75.557 | 47.376 | 34.306 | 1.00 | 0.00 | O |
| ATOM | 5500 | CB  | GLU | B | 988 | 76.539 | 46.740 | 31.420 | 1.00 | 0.00 | C |
| ATOM | 5501 | CG  | GLU | B | 988 | 75.592 | 47.348 | 30.384 | 1.00 | 0.00 | C |
| ATOM | 5502 | CD  | GLU | B | 988 | 74.194 | 47.404 | 30.977 | 1.00 | 0.00 | C |
| ATOM | 5503 | OE1 | GLU | B | 988 | 73.944 | 46.699 | 31.993 | 1.00 | 0.00 | O |
| ATOM | 5504 | OE2 | GLU | B | 988 | 73.354 | 48.154 | 30.417 | 1.00 | 0.00 | O |
| ATOM | 5505 | N   | ASN | B | 989 | 75.221 | 49.225 | 33.057 | 1.00 | 0.00 | N |
| ATOM | 5506 | CA  | ASN | B | 989 | 74.067 | 49.587 | 33.821 | 1.00 | 0.00 | C |
| ATOM | 5507 | C   | ASN | B | 989 | 72.931 | 49.681 | 32.859 | 1.00 | 0.00 | C |
| ATOM | 5508 | O   | ASN | B | 989 | 73.056 | 50.280 | 31.792 | 1.00 | 0.00 | O |
| ATOM | 5509 | CB  | ASN | B | 989 | 74.181 | 50.943 | 34.537 | 1.00 | 0.00 | C |
| ATOM | 5510 | CG  | ASN | B | 989 | 73.037 | 51.038 | 35.539 | 1.00 | 0.00 | C |
| ATOM | 5511 | ND2 | ASN | B | 989 | 73.367 | 51.442 | 36.794 | 1.00 | 0.00 | N |
| ATOM | 5512 | OD1 | ASN | B | 989 | 71.884 | 50.753 | 35.219 | 1.00 | 0.00 | O |
| ATOM | 5513 | N   | ASN | B | 990 | 71.783 | 49.072 | 33.202 | 1.00 | 0.00 | N |
| ATOM | 5514 | CA  | ASN | B | 990 | 70.694 | 49.138 | 32.278 | 1.00 | 0.00 | C |
| ATOM | 5515 | C   | ASN | B | 990 | 69.678 | 50.086 | 32.821 | 1.00 | 0.00 | C |
| ATOM | 5516 | O   | ASN | B | 990 | 69.140 | 49.888 | 33.907 | 1.00 | 0.00 | O |
| ATOM | 5517 | CB  | ASN | B | 990 | 69.958 | 47.802 | 32.080 | 1.00 | 0.00 | C |
| ATOM | 5518 | CG  | ASN | B | 990 | 70.866 | 46.802 | 31.380 | 1.00 | 0.00 | C |
| ATOM | 5519 | ND2 | ASN | B | 990 | 71.009 | 46.949 | 30.034 | 1.00 | 0.00 | N |
| ATOM | 5520 | OD1 | ASN | B | 990 | 71.421 | 45.903 | 32.011 | 1.00 | 0.00 | O |
| ATOM | 5521 | N   | ASP | B | 991 | 69.413 | 51.170 | 32.070 | 1.00 | 0.00 | N |
| ATOM | 5522 | CA  | ASP | B | 991 | 68.390 | 52.085 | 32.468 | 1.00 | 0.00 | C |
| ATOM | 5523 | C   | ASP | B | 991 | 67.092 | 51.362 | 32.318 | 1.00 | 0.00 | C |
| ATOM | 5524 | O   | ASP | B | 991 | 66.160 | 51.554 | 33.096 | 1.00 | 0.00 | O |
| ATOM | 5525 | CB  | ASP | B | 991 | 68.342 | 53.363 | 31.614 | 1.00 | 0.00 | C |
| ATOM | 5526 | CG  | ASP | B | 991 | 68.042 | 52.984 | 30.171 | 1.00 | 0.00 | C |
| ATOM | 5527 | OD1 | ASP | B | 991 | 68.550 | 51.925 | 29.713 | 1.00 | 0.00 | O |
| ATOM | 5528 | OD2 | ASP | B | 991 | 67.298 | 53.754 | 29.507 | 1.00 | 0.00 | O |
| ATOM | 5529 | N   | GLN | B | 992 | 67.011 | 50.500 | 31.285 | 1.00 | 0.00 | N |
| ATOM | 5530 | CA  | GLN | B | 992 | 65.805 | 49.776 | 31.019 | 1.00 | 0.00 | C |
| ATOM | 5531 | C   | GLN | B | 992 | 65.507 | 48.816 | 32.134 | 1.00 | 0.00 | C |
| ATOM | 5532 | O   | GLN | B | 992 | 64.351 | 48.684 | 32.534 | 1.00 | 0.00 | O |
| ATOM | 5533 | CB  | GLN | B | 992 | 65.810 | 49.042 | 29.663 | 1.00 | 0.00 | C |
| ATOM | 5534 | CG  | GLN | B | 992 | 66.882 | 47.970 | 29.470 | 1.00 | 0.00 | C |
| ATOM | 5535 | CD  | GLN | B | 992 | 66.709 | 47.422 | 28.057 | 1.00 | 0.00 | C |
| ATOM | 5536 | NE2 | GLN | B | 992 | 66.830 | 48.316 | 27.037 | 1.00 | 0.00 | N |
| ATOM | 5537 | OE1 | GLN | B | 992 | 66.469 | 46.228 | 27.863 | 1.00 | 0.00 | O |

|      |      |     |           |        |        |        |      |      |     |
|------|------|-----|-----------|--------|--------|--------|------|------|-----|
| ATOM | 5538 | N   | VAL B 993 | 66.534 | 48.147 | 32.701 | 1.00 | 0.00 | N   |
| ATOM | 5539 | CA  | VAL B 993 | 66.285 | 47.200 | 33.755 | 1.00 | 0.00 | C   |
| ATOM | 5540 | C   | VAL B 993 | 65.614 | 47.930 | 34.857 | 1.00 | 0.00 | C   |
| ATOM | 5541 | O   | VAL B 993 | 64.645 | 47.448 | 35.446 | 1.00 | 0.00 | O   |
| ATOM | 5542 | CB  | VAL B 993 | 67.526 | 46.620 | 34.379 | 1.00 | 0.00 | C   |
| ATOM | 5543 | CG1 | VAL B 993 | 67.108 | 45.827 | 35.629 | 1.00 | 0.00 | C   |
| ATOM | 5544 | CG2 | VAL B 993 | 68.274 | 45.760 | 33.350 | 1.00 | 0.00 | C   |
| ATOM | 5545 | N   | TRP B 994 | 66.113 | 49.131 | 35.173 | 1.00 | 0.00 | N   |
| ATOM | 5546 | CA  | TRP B 994 | 65.472 | 49.872 | 36.206 | 1.00 | 0.00 | C   |
| ATOM | 5547 | C   | TRP B 994 | 64.055 | 50.090 | 35.864 | 1.00 | 0.00 | C   |
| ATOM | 5548 | O   | TRP B 994 | 63.184 | 49.866 | 36.702 | 1.00 | 0.00 | O   |
| ATOM | 5549 | CB  | TRP B 994 | 65.910 | 51.308 | 36.319 | 1.00 | 0.00 | C   |
| ATOM | 5550 | CG  | TRP B 994 | 64.739 | 52.160 | 36.758 | 1.00 | 0.00 | C   |
| ATOM | 5551 | CD1 | TRP B 994 | 63.988 | 52.167 | 37.908 | 1.00 | 0.00 | C   |
| ATOM | 5552 | CD2 | TRP B 994 | 64.346 | 53.337 | 36.027 | 1.00 | 0.00 | C   |
| ATOM | 5553 | CE2 | TRP B 994 | 63.387 | 54.004 | 36.788 | 1.00 | 0.00 | C   |
| ATOM | 5554 | CE3 | TRP B 994 | 64.783 | 53.839 | 34.835 | 1.00 | 0.00 | C   |
| ATOM | 5555 | NE1 | TRP B 994 | 63.176 | 53.276 | 37.935 | 1.00 | 0.00 | N   |
| ATOM | 5556 | CZ2 | TRP B 994 | 62.847 | 55.185 | 36.364 | 1.00 | 0.00 | C   |
| ATOM | 5557 | CZ3 | TRP B 994 | 64.213 | 55.012 | 34.399 | 1.00 | 0.00 | C   |
| ATOM | 5558 | CH2 | TRP B 994 | 63.263 | 55.674 | 35.151 | 1.00 | 0.00 | C   |
| ATOM | 5559 | N   | LYS B 995 | 63.809 | 50.562 | 34.631 | 1.00 | 0.00 | N   |
| ATOM | 5560 | CA  | LYS B 995 | 62.489 | 50.984 | 34.279 | 1.00 | 0.00 | C   |
| ATOM | 5561 | C   | LYS B 995 | 61.567 | 49.845 | 34.496 | 1.00 | 0.00 | C   |
| ATOM | 5562 | O   | LYS B 995 | 60.438 | 50.046 | 34.941 | 1.00 | 0.00 | O   |
| ATOM | 5563 | CB  | LYS B 995 | 62.327 | 51.392 | 32.804 | 1.00 | 0.00 | C   |
| ATOM | 5564 | CG  | LYS B 995 | 62.620 | 52.861 | 32.492 | 1.00 | 0.00 | C   |
| ATOM | 5565 | CD  | LYS B 995 | 61.614 | 53.849 | 33.094 | 1.00 | 0.00 | C   |
| ATOM | 5566 | CE  | LYS B 995 | 61.830 | 55.284 | 32.604 | 1.00 | 0.00 | C   |
| ATOM | 5567 | NZ  | LYS B 995 | 60.770 | 56.174 | 33.125 | 1.00 | 0.00 | N1+ |
| ATOM | 5568 | N   | PHE B 996 | 62.027 | 48.622 | 34.197 | 1.00 | 0.00 | N   |
| ATOM | 5569 | CA  | PHE B 996 | 61.181 | 47.489 | 34.372 | 1.00 | 0.00 | C   |
| ATOM | 5570 | C   | PHE B 996 | 60.783 | 47.420 | 35.811 | 1.00 | 0.00 | C   |
| ATOM | 5571 | O   | PHE B 996 | 59.602 | 47.296 | 36.125 | 1.00 | 0.00 | O   |
| ATOM | 5572 | CB  | PHE B 996 | 61.885 | 46.161 | 34.027 | 1.00 | 0.00 | C   |
| ATOM | 5573 | CG  | PHE B 996 | 60.909 | 45.053 | 34.248 | 1.00 | 0.00 | C   |
| ATOM | 5574 | CD1 | PHE B 996 | 60.036 | 44.680 | 33.253 | 1.00 | 0.00 | C   |
| ATOM | 5575 | CD2 | PHE B 996 | 60.864 | 44.391 | 35.452 | 1.00 | 0.00 | C   |
| ATOM | 5576 | CE1 | PHE B 996 | 59.134 | 43.662 | 33.453 | 1.00 | 0.00 | C   |
| ATOM | 5577 | CE2 | PHE B 996 | 59.965 | 43.372 | 35.657 | 1.00 | 0.00 | C   |
| ATOM | 5578 | CZ  | PHE B 996 | 59.097 | 43.003 | 34.657 | 1.00 | 0.00 | C   |
| ATOM | 5579 | N   | GLN B 997 | 61.761 | 47.519 | 36.734 | 1.00 | 0.00 | N   |
| ATOM | 5580 | CA  | GLN B 997 | 61.441 | 47.415 | 38.129 | 1.00 | 0.00 | C   |
| ATOM | 5581 | C   | GLN B 997 | 60.576 | 48.558 | 38.546 | 1.00 | 0.00 | C   |

|      |      |     |           |        |        |        |      |      |   |
|------|------|-----|-----------|--------|--------|--------|------|------|---|
| ATOM | 5582 | O   | GLN B 997 | 59.656 | 48.394 | 39.342 | 1.00 | 0.00 | O |
| ATOM | 5583 | CB  | GLN B 997 | 62.653 | 47.405 | 39.078 | 1.00 | 0.00 | C |
| ATOM | 5584 | CG  | GLN B 997 | 62.212 | 47.346 | 40.546 | 1.00 | 0.00 | C |
| ATOM | 5585 | CD  | GLN B 997 | 63.403 | 47.004 | 41.419 | 1.00 | 0.00 | C |
| ATOM | 5586 | NE2 | GLN B 997 | 64.380 | 46.255 | 40.845 | 1.00 | 0.00 | N |
| ATOM | 5587 | OE1 | GLN B 997 | 63.455 | 47.364 | 42.595 | 1.00 | 0.00 | O |
| ATOM | 5588 | N   | ARG B 998 | 60.860 | 49.757 | 38.023 | 1.00 | 0.00 | N |
| ATOM | 5589 | CA  | ARG B 998 | 60.121 | 50.930 | 38.383 | 1.00 | 0.00 | C |
| ATOM | 5590 | C   | ARG B 998 | 58.684 | 50.749 | 37.995 | 1.00 | 0.00 | C |
| ATOM | 5591 | O   | ARG B 998 | 57.781 | 51.034 | 38.777 | 1.00 | 0.00 | O |
| ATOM | 5592 | CB  | ARG B 998 | 60.653 | 52.145 | 37.613 | 1.00 | 0.00 | C |
| ATOM | 5593 | CG  | ARG B 998 | 59.748 | 53.368 | 37.649 | 1.00 | 0.00 | C |
| ATOM | 5594 | CD  | ARG B 998 | 58.873 | 53.511 | 36.404 | 1.00 | 0.00 | C |
| ATOM | 5595 | NE  | ARG B 998 | 58.065 | 54.749 | 36.590 | 1.00 | 0.00 | N |
| ATOM | 5596 | CZ  | ARG B 998 | 58.626 | 55.956 | 36.292 | 1.00 | 0.00 | C |
| ATOM | 5597 | NH1 | ARG B 998 | 59.900 | 56.007 | 35.809 | 1.00 | 0.00 | N |
| ATOM | 5598 | NH2 | ARG B 998 | 57.926 | 57.110 | 36.494 | 1.00 | 0.00 | N |
| ATOM | 5599 | N   | TYR B 999 | 58.460 | 50.255 | 36.763 | 1.00 | 0.00 | N |
| ATOM | 5600 | CA  | TYR B 999 | 57.164 | 50.044 | 36.190 | 1.00 | 0.00 | C |
| ATOM | 5601 | C   | TYR B 999 | 56.447 | 49.000 | 36.980 | 1.00 | 0.00 | C |
| ATOM | 5602 | O   | TYR B 999 | 55.258 | 49.123 | 37.265 | 1.00 | 0.00 | O |
| ATOM | 5603 | CB  | TYR B 999 | 57.278 | 49.550 | 34.734 | 1.00 | 0.00 | C |
| ATOM | 5604 | CG  | TYR B 999 | 55.926 | 49.256 | 34.189 | 1.00 | 0.00 | C |
| ATOM | 5605 | CD1 | TYR B 999 | 55.062 | 50.284 | 33.913 | 1.00 | 0.00 | C |
| ATOM | 5606 | CD2 | TYR B 999 | 55.522 | 47.969 | 33.921 | 1.00 | 0.00 | C |
| ATOM | 5607 | CE1 | TYR B 999 | 53.812 | 50.051 | 33.399 | 1.00 | 0.00 | C |
| ATOM | 5608 | CE2 | TYR B 999 | 54.272 | 47.724 | 33.402 | 1.00 | 0.00 | C |
| ATOM | 5609 | CZ  | TYR B 999 | 53.412 | 48.764 | 33.145 | 1.00 | 0.00 | C |
| ATOM | 5610 | OH  | TYR B 999 | 52.129 | 48.529 | 32.616 | 1.00 | 0.00 | O |
| ATOM | 5611 | N   | PHE B1000 | 57.166 | 47.933 | 37.355 | 1.00 | 0.00 | N |
| ATOM | 5612 | CA  | PHE B1000 | 56.571 | 46.847 | 38.070 | 1.00 | 0.00 | C |
| ATOM | 5613 | C   | PHE B1000 | 56.043 | 47.373 | 39.363 | 1.00 | 0.00 | C |
| ATOM | 5614 | O   | PHE B1000 | 54.908 | 47.081 | 39.738 | 1.00 | 0.00 | O |
| ATOM | 5615 | CB  | PHE B1000 | 57.595 | 45.741 | 38.387 | 1.00 | 0.00 | C |
| ATOM | 5616 | CG  | PHE B1000 | 56.906 | 44.650 | 39.127 | 1.00 | 0.00 | C |
| ATOM | 5617 | CD1 | PHE B1000 | 56.171 | 43.701 | 38.450 | 1.00 | 0.00 | C |
| ATOM | 5618 | CD2 | PHE B1000 | 57.002 | 44.570 | 40.497 | 1.00 | 0.00 | C |
| ATOM | 5619 | CE1 | PHE B1000 | 55.540 | 42.691 | 39.134 | 1.00 | 0.00 | C |
| ATOM | 5620 | CE2 | PHE B1000 | 56.370 | 43.559 | 41.184 | 1.00 | 0.00 | C |
| ATOM | 5621 | CZ  | PHE B1000 | 55.638 | 42.618 | 40.502 | 1.00 | 0.00 | C |
| ATOM | 5622 | N   | LEU B1001 | 56.851 | 48.182 | 40.072 | 1.00 | 0.00 | N |
| ATOM | 5623 | CA  | LEU B1001 | 56.447 | 48.688 | 41.349 | 1.00 | 0.00 | C |
| ATOM | 5624 | C   | LEU B1001 | 55.249 | 49.578 | 41.209 | 1.00 | 0.00 | C |
| ATOM | 5625 | O   | LEU B1001 | 54.308 | 49.474 | 41.996 | 1.00 | 0.00 | O |

|      |      |     |     |       |        |        |        |      |      |   |
|------|------|-----|-----|-------|--------|--------|--------|------|------|---|
| ATOM | 5626 | CB  | LEU | B1001 | 57.535 | 49.502 | 42.067 | 1.00 | 0.00 | C |
| ATOM | 5627 | CG  | LEU | B1001 | 58.738 | 48.656 | 42.513 | 1.00 | 0.00 | C |
| ATOM | 5628 | CD1 | LEU | B1001 | 59.677 | 49.479 | 43.403 | 1.00 | 0.00 | C |
| ATOM | 5629 | CD2 | LEU | B1001 | 58.289 | 47.348 | 43.180 | 1.00 | 0.00 | C |
| ATOM | 5630 | N   | VAL | B1002 | 55.240 | 50.471 | 40.204 | 1.00 | 0.00 | N |
| ATOM | 5631 | CA  | VAL | B1002 | 54.143 | 51.387 | 40.084 | 1.00 | 0.00 | C |
| ATOM | 5632 | C   | VAL | B1002 | 52.894 | 50.617 | 39.796 | 1.00 | 0.00 | C |
| ATOM | 5633 | O   | VAL | B1002 | 51.835 | 50.925 | 40.338 | 1.00 | 0.00 | O |
| ATOM | 5634 | CB  | VAL | B1002 | 54.326 | 52.409 | 38.996 | 1.00 | 0.00 | C |
| ATOM | 5635 | CG1 | VAL | B1002 | 55.567 | 53.259 | 39.330 | 1.00 | 0.00 | C |
| ATOM | 5636 | CG2 | VAL | B1002 | 54.394 | 51.698 | 37.635 | 1.00 | 0.00 | C |
| ATOM | 5637 | N   | GLN | B1003 | 52.982 | 49.588 | 38.928 | 1.00 | 0.00 | N |
| ATOM | 5638 | CA  | GLN | B1003 | 51.814 | 48.829 | 38.585 | 1.00 | 0.00 | C |
| ATOM | 5639 | C   | GLN | B1003 | 51.299 | 48.142 | 39.807 | 1.00 | 0.00 | C |
| ATOM | 5640 | O   | GLN | B1003 | 50.097 | 48.115 | 40.051 | 1.00 | 0.00 | O |
| ATOM | 5641 | CB  | GLN | B1003 | 52.066 | 47.681 | 37.602 | 1.00 | 0.00 | C |
| ATOM | 5642 | CG  | GLN | B1003 | 52.380 | 48.090 | 36.173 | 1.00 | 0.00 | C |
| ATOM | 5643 | CD  | GLN | B1003 | 52.292 | 46.798 | 35.385 | 1.00 | 0.00 | C |
| ATOM | 5644 | NE2 | GLN | B1003 | 53.365 | 45.966 | 35.470 | 1.00 | 0.00 | N |
| ATOM | 5645 | OE1 | GLN | B1003 | 51.281 | 46.521 | 34.745 | 1.00 | 0.00 | O |
| ATOM | 5646 | N   | GLU | B1004 | 52.212 | 47.567 | 40.611 | 1.00 | 0.00 | N |
| ATOM | 5647 | CA  | GLU | B1004 | 51.803 | 46.830 | 41.771 | 1.00 | 0.00 | C |
| ATOM | 5648 | C   | GLU | B1004 | 51.103 | 47.789 | 42.679 | 1.00 | 0.00 | C |
| ATOM | 5649 | O   | GLU | B1004 | 50.095 | 47.465 | 43.303 | 1.00 | 0.00 | O |
| ATOM | 5650 | CB  | GLU | B1004 | 53.004 | 46.235 | 42.529 | 1.00 | 0.00 | C |
| ATOM | 5651 | CG  | GLU | B1004 | 52.623 | 45.428 | 43.769 | 1.00 | 0.00 | C |
| ATOM | 5652 | CD  | GLU | B1004 | 53.915 | 44.915 | 44.392 | 1.00 | 0.00 | C |
| ATOM | 5653 | OE1 | GLU | B1004 | 54.815 | 44.495 | 43.618 | 1.00 | 0.00 | O |
| ATOM | 5654 | OE2 | GLU | B1004 | 54.023 | 44.943 | 45.647 | 1.00 | 0.00 | O |
| ATOM | 5655 | N   | TYR | B1005 | 51.646 | 49.014 | 42.741 | 1.00 | 0.00 | N |
| ATOM | 5656 | CA  | TYR | B1005 | 51.159 | 50.115 | 43.515 | 1.00 | 0.00 | C |
| ATOM | 5657 | C   | TYR | B1005 | 49.776 | 50.450 | 43.047 | 1.00 | 0.00 | C |
| ATOM | 5658 | O   | TYR | B1005 | 48.859 | 50.592 | 43.851 | 1.00 | 0.00 | O |
| ATOM | 5659 | CB  | TYR | B1005 | 52.102 | 51.314 | 43.259 | 1.00 | 0.00 | C |
| ATOM | 5660 | CG  | TYR | B1005 | 51.518 | 52.650 | 43.574 | 1.00 | 0.00 | C |
| ATOM | 5661 | CD1 | TYR | B1005 | 50.651 | 53.243 | 42.684 | 1.00 | 0.00 | C |
| ATOM | 5662 | CD2 | TYR | B1005 | 51.869 | 53.337 | 44.713 | 1.00 | 0.00 | C |
| ATOM | 5663 | CE1 | TYR | B1005 | 50.115 | 54.482 | 42.929 | 1.00 | 0.00 | C |
| ATOM | 5664 | CE2 | TYR | B1005 | 51.335 | 54.579 | 44.966 | 1.00 | 0.00 | C |
| ATOM | 5665 | CZ  | TYR | B1005 | 50.459 | 55.153 | 44.074 | 1.00 | 0.00 | C |
| ATOM | 5666 | OH  | TYR | B1005 | 49.916 | 56.429 | 44.337 | 1.00 | 0.00 | O |
| ATOM | 5667 | N   | CYS | B1006 | 49.597 | 50.554 | 41.719 | 1.00 | 0.00 | N |
| ATOM | 5668 | CA  | CYS | B1006 | 48.324 | 50.921 | 41.175 | 1.00 | 0.00 | C |
| ATOM | 5669 | C   | CYS | B1006 | 47.323 | 49.861 | 41.506 | 1.00 | 0.00 | C |

|        |      |     |           |        |        |        |      |      |      |
|--------|------|-----|-----------|--------|--------|--------|------|------|------|
| ATOM   | 5670 | O   | CYS B1006 | 46.203 | 50.159 | 41.916 | 1.00 | 0.00 | O    |
| ATOM   | 5671 | CB  | CYS B1006 | 48.354 | 51.081 | 39.646 | 1.00 | 0.00 | C    |
| ATOM   | 5672 | SG  | CYS B1006 | 49.437 | 52.441 | 39.112 | 1.00 | 0.00 | S    |
| ATOM   | 5673 | N   | SER B1007 | 47.707 | 48.583 | 41.340 | 1.00 | 0.00 | N    |
| ATOM   | 5674 | CA  | SER B1007 | 46.770 | 47.527 | 41.577 | 1.00 | 0.00 | C    |
| ATOM   | 5675 | C   | SER B1007 | 46.352 | 47.556 | 43.011 | 1.00 | 0.00 | C    |
| ATOM   | 5676 | O   | SER B1007 | 45.160 | 47.548 | 43.317 | 1.00 | 0.00 | O    |
| ATOM   | 5677 | CB  | SER B1007 | 47.367 | 46.135 | 41.296 | 1.00 | 0.00 | C    |
| ATOM   | 5678 | OG  | SER B1007 | 46.400 | 45.126 | 41.548 | 1.00 | 0.00 | O    |
| ATOM   | 5679 | N   | ARG B1008 | 47.330 | 47.600 | 43.934 | 1.00 | 0.00 | N    |
| ATOM   | 5680 | CA  | ARG B1008 | 47.013 | 47.546 | 45.333 | 1.00 | 0.00 | C    |
| ATOM   | 5681 | C   | ARG B1008 | 46.224 | 48.750 | 45.722 | 1.00 | 0.00 | C    |
| ATOM   | 5682 | O   | ARG B1008 | 45.204 | 48.645 | 46.400 | 1.00 | 0.00 | O    |
| ATOM   | 5683 | CB  | ARG B1008 | 48.264 | 47.501 | 46.226 | 1.00 | 0.00 | C    |
| ATOM   | 5684 | CG  | ARG B1008 | 47.949 | 47.443 | 47.723 | 1.00 | 0.00 | C    |
| ATOM   | 5685 | CD  | ARG B1008 | 49.199 | 47.338 | 48.601 | 1.00 | 0.00 | C    |
| ATOM   | 5686 | NE  | ARG B1008 | 48.753 | 47.345 | 50.024 | 1.00 | 0.00 | N    |
| ATOM   | 5687 | CZ  | ARG B1008 | 48.774 | 48.508 | 50.736 | 1.00 | 0.00 | C    |
| ATOM   | 5688 | NH1 | ARG B1008 | 49.248 | 49.651 | 50.164 | 1.00 | 0.00 | N    |
| ATOM   | 5689 | NH2 | ARG B1008 | 48.327 | 48.528 | 52.028 | 1.00 | 0.00 | N    |
| ATOM   | 5690 | N   | LEU B1009 | 46.675 | 49.935 | 45.276 | 1.00 | 0.00 | N    |
| ATOM   | 5691 | CA  | LEU B1009 | 46.039 | 51.166 | 45.637 | 1.00 | 0.00 | C    |
| ATOM   | 5692 | C   | LEU B1009 | 44.681 | 51.258 | 45.027 | 1.00 | 0.00 | C    |
| ATOM   | 5693 | O   | LEU B1009 | 43.829 | 51.987 | 45.535 | 1.00 | 0.00 | O    |
| ATOM   | 5694 | CB  | LEU B1009 | 46.840 | 52.430 | 45.295 | 1.00 | 0.00 | C    |
| ATOM   | 5695 | CG  | LEU B1009 | 48.085 | 52.575 | 46.186 | 1.00 | 0.00 | C    |
| ATOM   | 5696 | CD1 | LEU B1009 | 48.674 | 53.986 | 46.092 | 1.00 | 0.00 | C    |
| ATOM   | 5697 | CD2 | LEU B1009 | 47.789 | 52.151 | 47.634 | 1.00 | 0.00 | C    |
| ATOM   | 5698 | N   | ASN B1010 | 44.459 | 50.591 | 43.880 | 1.00 | 0.00 | N    |
| ATOM   | 5699 | CA  | ASN B1010 | 43.156 | 50.690 | 43.296 | 1.00 | 0.00 | C    |
| ATOM   | 5700 | C   | ASN B1010 | 42.249 | 49.653 | 43.947 | 1.00 | 0.00 | C    |
| ATOM   | 5701 | O   | ASN B1010 | 42.691 | 49.036 | 44.952 | 1.00 | 0.00 | O    |
| ATOM   | 5702 | CB  | ASN B1010 | 43.136 | 50.458 | 41.773 | 1.00 | 0.00 | C    |
| ATOM   | 5703 | CG  | ASN B1010 | 41.851 | 51.079 | 41.235 | 1.00 | 0.00 | C    |
| ATOM   | 5704 | ND2 | ASN B1010 | 41.704 | 51.103 | 39.883 | 1.00 | 0.00 | N    |
| ATOM   | 5705 | OD1 | ASN B1010 | 41.003 | 51.544 | 41.996 | 1.00 | 0.00 | O    |
| ATOM   | 5706 | OXT | ASN B1010 | 41.100 | 49.472 | 43.461 | 1.00 | 0.00 | O1-  |
| HETATM | 5707 | CA  | CA1 B1011 | 51.926 | 44.589 | 52.357 | 1.00 | 0.00 | CA2+ |
| TER    | 5708 | CA1 | B1011     |        |        |        |      |      |      |
| ATOM   | 5709 | N   | GLN C 671 | 84.016 | 32.890 | 26.798 | 1.00 | 0.00 | N1+  |
| ATOM   | 5710 | CA  | GLN C 671 | 83.040 | 32.332 | 25.899 | 1.00 | 0.00 | C    |
| ATOM   | 5711 | C   | GLN C 671 | 82.088 | 31.441 | 26.636 | 1.00 | 0.00 | C    |
| ATOM   | 5712 | O   | GLN C 671 | 82.406 | 30.808 | 27.640 | 1.00 | 0.00 | O    |
| ATOM   | 5713 | CB  | GLN C 671 | 83.690 | 31.491 | 24.788 | 1.00 | 0.00 | C    |



|      |      |     |     |   |     |        |        |        |      |      |   |
|------|------|-----|-----|---|-----|--------|--------|--------|------|------|---|
| ATOM | 5714 | CG  | GLN | C | 671 | 84.429 | 30.271 | 25.339 | 1.00 | 0.00 | C |
| ATOM | 5715 | CD  | GLN | C | 671 | 85.135 | 29.563 | 24.190 | 1.00 | 0.00 | C |
| ATOM | 5716 | NE2 | GLN | C | 671 | 85.979 | 28.553 | 24.531 | 1.00 | 0.00 | N |
| ATOM | 5717 | OE1 | GLN | C | 671 | 84.947 | 29.904 | 23.023 | 1.00 | 0.00 | O |
| ATOM | 5718 | N   | PRO | C | 672 | 80.879 | 31.440 | 26.131 | 1.00 | 0.00 | N |
| ATOM | 5719 | CA  | PRO | C | 672 | 79.829 | 30.643 | 26.705 | 1.00 | 0.00 | C |
| ATOM | 5720 | C   | PRO | C | 672 | 80.008 | 29.165 | 26.539 | 1.00 | 0.00 | C |
| ATOM | 5721 | O   | PRO | C | 672 | 79.416 | 28.420 | 27.318 | 1.00 | 0.00 | O |
| ATOM | 5722 | CB  | PRO | C | 672 | 78.531 | 31.166 | 26.095 | 1.00 | 0.00 | C |
| ATOM | 5723 | CG  | PRO | C | 672 | 78.846 | 32.637 | 25.780 | 1.00 | 0.00 | C |
| ATOM | 5724 | CD  | PRO | C | 672 | 80.360 | 32.649 | 25.510 | 1.00 | 0.00 | C |
| ATOM | 5725 | N   | GLY | C | 673 | 80.775 | 28.708 | 25.529 | 1.00 | 0.00 | N |
| ATOM | 5726 | CA  | GLY | C | 673 | 80.869 | 27.291 | 25.328 | 1.00 | 0.00 | C |
| ATOM | 5727 | C   | GLY | C | 673 | 81.533 | 26.638 | 26.500 | 1.00 | 0.00 | C |
| ATOM | 5728 | O   | GLY | C | 673 | 81.012 | 25.680 | 27.069 | 1.00 | 0.00 | O |
| ATOM | 5729 | N   | VAL | C | 674 | 82.700 | 27.164 | 26.907 | 1.00 | 0.00 | N |
| ATOM | 5730 | CA  | VAL | C | 674 | 83.430 | 26.593 | 27.995 | 1.00 | 0.00 | C |
| ATOM | 5731 | C   | VAL | C | 674 | 82.625 | 26.769 | 29.235 | 1.00 | 0.00 | C |
| ATOM | 5732 | O   | VAL | C | 674 | 82.592 | 25.889 | 30.092 | 1.00 | 0.00 | O |
| ATOM | 5733 | CB  | VAL | C | 674 | 84.760 | 27.256 | 28.209 | 1.00 | 0.00 | C |
| ATOM | 5734 | CG1 | VAL | C | 674 | 84.523 | 28.746 | 28.500 | 1.00 | 0.00 | C |
| ATOM | 5735 | CG2 | VAL | C | 674 | 85.501 | 26.514 | 29.338 | 1.00 | 0.00 | C |
| ATOM | 5736 | N   | GLN | C | 675 | 81.948 | 27.924 | 29.361 | 1.00 | 0.00 | N |
| ATOM | 5737 | CA  | GLN | C | 675 | 81.184 | 28.204 | 30.539 | 1.00 | 0.00 | C |
| ATOM | 5738 | C   | GLN | C | 675 | 80.088 | 27.190 | 30.648 | 1.00 | 0.00 | C |
| ATOM | 5739 | O   | GLN | C | 675 | 79.790 | 26.709 | 31.739 | 1.00 | 0.00 | O |
| ATOM | 5740 | CB  | GLN | C | 675 | 80.538 | 29.598 | 30.521 | 1.00 | 0.00 | C |
| ATOM | 5741 | CG  | GLN | C | 675 | 81.563 | 30.737 | 30.543 | 1.00 | 0.00 | C |
| ATOM | 5742 | CD  | GLN | C | 675 | 82.274 | 30.709 | 31.886 | 1.00 | 0.00 | C |
| ATOM | 5743 | NE2 | GLN | C | 675 | 83.494 | 31.310 | 31.940 | 1.00 | 0.00 | N |
| ATOM | 5744 | OE1 | GLN | C | 675 | 81.764 | 30.167 | 32.865 | 1.00 | 0.00 | O |
| ATOM | 5745 | N   | ASN | C | 676 | 79.465 | 26.835 | 29.511 | 1.00 | 0.00 | N |
| ATOM | 5746 | CA  | ASN | C | 676 | 78.401 | 25.873 | 29.523 | 1.00 | 0.00 | C |
| ATOM | 5747 | C   | ASN | C | 676 | 78.991 | 24.593 | 30.018 | 1.00 | 0.00 | C |
| ATOM | 5748 | O   | ASN | C | 676 | 78.355 | 23.839 | 30.751 | 1.00 | 0.00 | O |
| ATOM | 5749 | CB  | ASN | C | 676 | 77.810 | 25.621 | 28.125 | 1.00 | 0.00 | C |
| ATOM | 5750 | CG  | ASN | C | 676 | 76.565 | 24.756 | 28.284 | 1.00 | 0.00 | C |
| ATOM | 5751 | ND2 | ASN | C | 676 | 75.429 | 25.219 | 27.700 | 1.00 | 0.00 | N |
| ATOM | 5752 | OD1 | ASN | C | 676 | 76.605 | 23.702 | 28.915 | 1.00 | 0.00 | O |
| ATOM | 5753 | N   | PHE | C | 677 | 80.249 | 24.340 | 29.627 | 1.00 | 0.00 | N |
| ATOM | 5754 | CA  | PHE | C | 677 | 80.970 | 23.166 | 30.014 | 1.00 | 0.00 | C |
| ATOM | 5755 | C   | PHE | C | 677 | 81.088 | 23.167 | 31.504 | 1.00 | 0.00 | C |
| ATOM | 5756 | O   | PHE | C | 677 | 80.929 | 22.128 | 32.141 | 1.00 | 0.00 | O |
| ATOM | 5757 | CB  | PHE | C | 677 | 82.394 | 23.148 | 29.431 | 1.00 | 0.00 | C |

|      |      |     |     |   |     |        |        |        |      |      |     |
|------|------|-----|-----|---|-----|--------|--------|--------|------|------|-----|
| ATOM | 5758 | CG  | PHE | C | 677 | 83.099 | 21.919 | 29.893 | 1.00 | 0.00 | C   |
| ATOM | 5759 | CD1 | PHE | C | 677 | 82.946 | 20.725 | 29.224 | 1.00 | 0.00 | C   |
| ATOM | 5760 | CD2 | PHE | C | 677 | 83.920 | 21.965 | 30.995 | 1.00 | 0.00 | C   |
| ATOM | 5761 | CE1 | PHE | C | 677 | 83.601 | 19.596 | 29.655 | 1.00 | 0.00 | C   |
| ATOM | 5762 | CE2 | PHE | C | 677 | 84.576 | 20.840 | 31.430 | 1.00 | 0.00 | C   |
| ATOM | 5763 | CZ  | PHE | C | 677 | 84.416 | 19.652 | 30.760 | 1.00 | 0.00 | C   |
| ATOM | 5764 | N   | LEU | C | 678 | 81.362 | 24.342 | 32.109 | 1.00 | 0.00 | N   |
| ATOM | 5765 | CA  | LEU | C | 678 | 81.508 | 24.373 | 33.540 | 1.00 | 0.00 | C   |
| ATOM | 5766 | C   | LEU | C | 678 | 80.237 | 23.883 | 34.139 | 1.00 | 0.00 | C   |
| ATOM | 5767 | O   | LEU | C | 678 | 80.239 | 23.045 | 35.040 | 1.00 | 0.00 | O   |
| ATOM | 5768 | CB  | LEU | C | 678 | 81.614 | 25.773 | 34.166 | 1.00 | 0.00 | C   |
| ATOM | 5769 | CG  | LEU | C | 678 | 82.914 | 26.567 | 33.987 | 1.00 | 0.00 | C   |
| ATOM | 5770 | CD1 | LEU | C | 678 | 83.149 | 26.992 | 32.534 | 1.00 | 0.00 | C   |
| ATOM | 5771 | CD2 | LEU | C | 678 | 82.918 | 27.752 | 34.969 | 1.00 | 0.00 | C   |
| ATOM | 5772 | N   | SER | C | 679 | 79.114 | 24.410 | 33.632 | 1.00 | 0.00 | N   |
| ATOM | 5773 | CA  | SER | C | 679 | 77.823 | 24.116 | 34.176 | 1.00 | 0.00 | C   |
| ATOM | 5774 | C   | SER | C | 679 | 77.559 | 22.650 | 34.059 | 1.00 | 0.00 | C   |
| ATOM | 5775 | O   | SER | C | 679 | 77.029 | 22.034 | 34.983 | 1.00 | 0.00 | O   |
| ATOM | 5776 | CB  | SER | C | 679 | 76.698 | 24.846 | 33.422 | 1.00 | 0.00 | C   |
| ATOM | 5777 | OG  | SER | C | 679 | 75.439 | 24.520 | 33.987 | 1.00 | 0.00 | O   |
| ATOM | 5778 | N   | LYS | C | 680 | 77.932 | 22.045 | 32.920 | 1.00 | 0.00 | N   |
| ATOM | 5779 | CA  | LYS | C | 680 | 77.662 | 20.652 | 32.739 | 1.00 | 0.00 | C   |
| ATOM | 5780 | C   | LYS | C | 680 | 78.416 | 19.898 | 33.782 | 1.00 | 0.00 | C   |
| ATOM | 5781 | O   | LYS | C | 680 | 77.890 | 18.964 | 34.383 | 1.00 | 0.00 | O   |
| ATOM | 5782 | CB  | LYS | C | 680 | 78.105 | 20.149 | 31.352 | 1.00 | 0.00 | C   |
| ATOM | 5783 | CG  | LYS | C | 680 | 77.777 | 18.679 | 31.043 | 1.00 | 0.00 | C   |
| ATOM | 5784 | CD  | LYS | C | 680 | 78.539 | 17.649 | 31.883 | 1.00 | 0.00 | C   |
| ATOM | 5785 | CE  | LYS | C | 680 | 78.227 | 16.196 | 31.513 | 1.00 | 0.00 | C   |
| ATOM | 5786 | NZ  | LYS | C | 680 | 79.042 | 15.276 | 32.334 | 1.00 | 0.00 | N1+ |
| ATOM | 5787 | N   | GLN | C | 681 | 79.680 | 20.290 | 34.021 | 1.00 | 0.00 | N   |
| ATOM | 5788 | CA  | GLN | C | 681 | 80.503 | 19.607 | 34.974 | 1.00 | 0.00 | C   |
| ATOM | 5789 | C   | GLN | C | 681 | 79.954 | 19.806 | 36.355 | 1.00 | 0.00 | C   |
| ATOM | 5790 | O   | GLN | C | 681 | 79.947 | 18.882 | 37.164 | 1.00 | 0.00 | O   |
| ATOM | 5791 | CB  | GLN | C | 681 | 81.959 | 20.107 | 34.951 | 1.00 | 0.00 | C   |
| ATOM | 5792 | CG  | GLN | C | 681 | 82.872 | 19.402 | 35.957 | 1.00 | 0.00 | C   |
| ATOM | 5793 | CD  | GLN | C | 681 | 84.300 | 19.857 | 35.686 | 1.00 | 0.00 | C   |
| ATOM | 5794 | NE2 | GLN | C | 681 | 84.837 | 20.748 | 36.560 | 1.00 | 0.00 | N   |
| ATOM | 5795 | OE1 | GLN | C | 681 | 84.922 | 19.432 | 34.715 | 1.00 | 0.00 | O   |
| ATOM | 5796 | N   | TRP | C | 682 | 79.476 | 21.029 | 36.645 | 1.00 | 0.00 | N   |
| ATOM | 5797 | CA  | TRP | C | 682 | 78.992 | 21.397 | 37.946 | 1.00 | 0.00 | C   |
| ATOM | 5798 | C   | TRP | C | 682 | 77.815 | 20.548 | 38.325 | 1.00 | 0.00 | C   |
| ATOM | 5799 | O   | TRP | C | 682 | 77.777 | 19.971 | 39.410 | 1.00 | 0.00 | O   |
| ATOM | 5800 | CB  | TRP | C | 682 | 78.522 | 22.861 | 37.965 | 1.00 | 0.00 | C   |
| ATOM | 5801 | CG  | TRP | C | 682 | 78.009 | 23.359 | 39.294 | 1.00 | 0.00 | C   |

|      |      |               |        |        |        |      |      |   |
|------|------|---------------|--------|--------|--------|------|------|---|
| ATOM | 5802 | CD1 TRP C 682 | 76.745 | 23.311 | 39.806 | 1.00 | 0.00 | C |
| ATOM | 5803 | CD2 TRP C 682 | 78.818 | 24.037 | 40.264 | 1.00 | 0.00 | C |
| ATOM | 5804 | CE2 TRP C 682 | 77.988 | 24.365 | 41.336 | 1.00 | 0.00 | C |
| ATOM | 5805 | CE3 TRP C 682 | 80.142 | 24.366 | 40.264 | 1.00 | 0.00 | C |
| ATOM | 5806 | NE1 TRP C 682 | 76.717 | 23.912 | 41.043 | 1.00 | 0.00 | N |
| ATOM | 5807 | CZ2 TRP C 682 | 78.471 | 25.030 | 42.428 | 1.00 | 0.00 | C |
| ATOM | 5808 | CZ3 TRP C 682 | 80.629 | 25.032 | 41.367 | 1.00 | 0.00 | C |
| ATOM | 5809 | CH2 TRP C 682 | 79.808 | 25.358 | 42.429 | 1.00 | 0.00 | C |
| ATOM | 5810 | N TYR C 683   | 76.816 | 20.452 | 37.425 | 1.00 | 0.00 | N |
| ATOM | 5811 | CA TYR C 683  | 75.615 | 19.700 | 37.668 | 1.00 | 0.00 | C |
| ATOM | 5812 | C TYR C 683   | 75.939 | 18.251 | 37.768 | 1.00 | 0.00 | C |
| ATOM | 5813 | O TYR C 683   | 75.299 | 17.518 | 38.523 | 1.00 | 0.00 | O |
| ATOM | 5814 | CB TYR C 683  | 74.547 | 19.843 | 36.571 | 1.00 | 0.00 | C |
| ATOM | 5815 | CG TYR C 683  | 73.949 | 21.202 | 36.664 | 1.00 | 0.00 | C |
| ATOM | 5816 | CD1 TYR C 683 | 73.121 | 21.525 | 37.714 | 1.00 | 0.00 | C |
| ATOM | 5817 | CD2 TYR C 683 | 74.193 | 22.143 | 35.693 | 1.00 | 0.00 | C |
| ATOM | 5818 | CE1 TYR C 683 | 72.556 | 22.774 | 37.803 | 1.00 | 0.00 | C |
| ATOM | 5819 | CE2 TYR C 683 | 73.630 | 23.394 | 35.778 | 1.00 | 0.00 | C |
| ATOM | 5820 | CZ TYR C 683  | 72.813 | 23.711 | 36.834 | 1.00 | 0.00 | C |
| ATOM | 5821 | OH TYR C 683  | 72.235 | 24.997 | 36.915 | 1.00 | 0.00 | O |
| ATOM | 5822 | N GLY C 684   | 76.914 | 17.780 | 36.971 | 1.00 | 0.00 | N |
| ATOM | 5823 | CA GLY C 684  | 77.232 | 16.388 | 37.014 | 1.00 | 0.00 | C |
| ATOM | 5824 | C GLY C 684   | 76.223 | 15.679 | 36.175 | 1.00 | 0.00 | C |
| ATOM | 5825 | O GLY C 684   | 75.778 | 16.193 | 35.148 | 1.00 | 0.00 | O |
| ATOM | 5826 | N GLU C 685   | 75.850 | 14.464 | 36.609 | 1.00 | 0.00 | N |
| ATOM | 5827 | CA GLU C 685  | 74.916 | 13.616 | 35.941 | 1.00 | 0.00 | C |
| ATOM | 5828 | C GLU C 685   | 73.593 | 14.301 | 35.888 | 1.00 | 0.00 | C |
| ATOM | 5829 | O GLU C 685   | 72.871 | 14.188 | 34.899 | 1.00 | 0.00 | O |
| ATOM | 5830 | CB GLU C 685  | 74.717 | 12.296 | 36.709 | 1.00 | 0.00 | C |
| ATOM | 5831 | CG GLU C 685  | 73.473 | 11.498 | 36.314 | 1.00 | 0.00 | C |
| ATOM | 5832 | CD GLU C 685  | 73.742 | 10.708 | 35.046 | 1.00 | 0.00 | C |
| ATOM | 5833 | OE1 GLU C 685 | 74.904 | 10.256 | 34.852 | 1.00 | 0.00 | O |
| ATOM | 5834 | OE2 GLU C 685 | 72.777 | 10.543 | 34.256 | 1.00 | 0.00 | O |
| ATOM | 5835 | N ILE C 686   | 73.229 | 15.025 | 36.961 | 1.00 | 0.00 | N |
| ATOM | 5836 | CA ILE C 686  | 71.942 | 15.648 | 36.990 | 1.00 | 0.00 | C |
| ATOM | 5837 | C ILE C 686   | 71.888 | 16.679 | 35.914 | 1.00 | 0.00 | C |
| ATOM | 5838 | O ILE C 686   | 72.806 | 17.477 | 35.739 | 1.00 | 0.00 | O |
| ATOM | 5839 | CB ILE C 686  | 71.618 | 16.301 | 38.305 | 1.00 | 0.00 | C |
| ATOM | 5840 | CG1 ILE C 686 | 71.611 | 15.259 | 39.439 | 1.00 | 0.00 | C |
| ATOM | 5841 | CG2 ILE C 686 | 70.271 | 17.018 | 38.147 | 1.00 | 0.00 | C |
| ATOM | 5842 | CD1 ILE C 686 | 72.991 | 14.678 | 39.755 | 1.00 | 0.00 | C |
| ATOM | 5843 | N SER C 687   | 70.786 | 16.656 | 35.138 | 1.00 | 0.00 | N |
| ATOM | 5844 | CA SER C 687  | 70.610 | 17.570 | 34.052 | 1.00 | 0.00 | C |
| ATOM | 5845 | C SER C 687   | 70.244 | 18.902 | 34.618 | 1.00 | 0.00 | C |

|      |      |     |     |   |     |        |        |        |      |      |     |
|------|------|-----|-----|---|-----|--------|--------|--------|------|------|-----|
| ATOM | 5846 | O   | SER | C | 687 | 69.786 | 19.016 | 35.754 | 1.00 | 0.00 | O   |
| ATOM | 5847 | CB  | SER | C | 687 | 69.503 | 17.151 | 33.071 | 1.00 | 0.00 | C   |
| ATOM | 5848 | OG  | SER | C | 687 | 69.388 | 18.103 | 32.024 | 1.00 | 0.00 | O   |
| ATOM | 5849 | N   | ARG | C | 688 | 70.454 | 19.955 | 33.806 | 1.00 | 0.00 | N   |
| ATOM | 5850 | CA  | ARG | C | 688 | 70.202 | 21.313 | 34.181 | 1.00 | 0.00 | C   |
| ATOM | 5851 | C   | ARG | C | 688 | 68.753 | 21.621 | 33.965 | 1.00 | 0.00 | C   |
| ATOM | 5852 | O   | ARG | C | 688 | 67.959 | 20.750 | 33.615 | 1.00 | 0.00 | O   |
| ATOM | 5853 | CB  | ARG | C | 688 | 71.030 | 22.323 | 33.370 | 1.00 | 0.00 | C   |
| ATOM | 5854 | CG  | ARG | C | 688 | 70.782 | 22.251 | 31.864 | 1.00 | 0.00 | C   |
| ATOM | 5855 | CD  | ARG | C | 688 | 71.795 | 23.063 | 31.051 | 1.00 | 0.00 | C   |
| ATOM | 5856 | NE  | ARG | C | 688 | 73.045 | 22.256 | 30.968 | 1.00 | 0.00 | N   |
| ATOM | 5857 | CZ  | ARG | C | 688 | 74.255 | 22.876 | 30.840 | 1.00 | 0.00 | C   |
| ATOM | 5858 | NH1 | ARG | C | 688 | 74.334 | 24.238 | 30.849 | 1.00 | 0.00 | N   |
| ATOM | 5859 | NH2 | ARG | C | 688 | 75.391 | 22.128 | 30.701 | 1.00 | 0.00 | N   |
| ATOM | 5860 | N   | ASP | C | 689 | 68.395 | 22.896 | 34.199 | 1.00 | 0.00 | N   |
| ATOM | 5861 | CA  | ASP | C | 689 | 67.062 | 23.402 | 34.060 | 1.00 | 0.00 | C   |
| ATOM | 5862 | C   | ASP | C | 689 | 66.137 | 22.698 | 34.998 | 1.00 | 0.00 | C   |
| ATOM | 5863 | O   | ASP | C | 689 | 65.017 | 22.343 | 34.636 | 1.00 | 0.00 | O   |
| ATOM | 5864 | CB  | ASP | C | 689 | 66.494 | 23.269 | 32.636 | 1.00 | 0.00 | C   |
| ATOM | 5865 | CG  | ASP | C | 689 | 65.246 | 24.137 | 32.552 | 1.00 | 0.00 | C   |
| ATOM | 5866 | OD1 | ASP | C | 689 | 64.936 | 24.828 | 33.559 | 1.00 | 0.00 | O   |
| ATOM | 5867 | OD2 | ASP | C | 689 | 64.590 | 24.124 | 31.476 | 1.00 | 0.00 | O   |
| ATOM | 5868 | N   | THR | C | 690 | 66.599 | 22.474 | 36.244 | 1.00 | 0.00 | N   |
| ATOM | 5869 | CA  | THR | C | 690 | 65.752 | 21.911 | 37.255 | 1.00 | 0.00 | C   |
| ATOM | 5870 | C   | THR | C | 690 | 65.765 | 22.900 | 38.375 | 1.00 | 0.00 | C   |
| ATOM | 5871 | O   | THR | C | 690 | 66.655 | 23.743 | 38.458 | 1.00 | 0.00 | O   |
| ATOM | 5872 | CB  | THR | C | 690 | 66.232 | 20.600 | 37.817 | 1.00 | 0.00 | C   |
| ATOM | 5873 | CG2 | THR | C | 690 | 66.321 | 19.576 | 36.672 | 1.00 | 0.00 | C   |
| ATOM | 5874 | OG1 | THR | C | 690 | 67.496 | 20.758 | 38.443 | 1.00 | 0.00 | O   |
| ATOM | 5875 | N   | LYS | C | 691 | 64.751 | 22.843 | 39.261 | 1.00 | 0.00 | N   |
| ATOM | 5876 | CA  | LYS | C | 691 | 64.708 | 23.786 | 40.338 | 1.00 | 0.00 | C   |
| ATOM | 5877 | C   | LYS | C | 691 | 65.776 | 23.435 | 41.321 | 1.00 | 0.00 | C   |
| ATOM | 5878 | O   | LYS | C | 691 | 66.026 | 22.271 | 41.625 | 1.00 | 0.00 | O   |
| ATOM | 5879 | CB  | LYS | C | 691 | 63.371 | 23.798 | 41.092 | 1.00 | 0.00 | C   |
| ATOM | 5880 | CG  | LYS | C | 691 | 62.242 | 24.432 | 40.287 | 1.00 | 0.00 | C   |
| ATOM | 5881 | CD  | LYS | C | 691 | 60.848 | 24.108 | 40.820 | 1.00 | 0.00 | C   |
| ATOM | 5882 | CE  | LYS | C | 691 | 59.727 | 24.856 | 40.100 | 1.00 | 0.00 | C   |
| ATOM | 5883 | NZ  | LYS | C | 691 | 58.416 | 24.482 | 40.673 | 1.00 | 0.00 | N1+ |
| ATOM | 5884 | N   | ASN | C | 692 | 66.469 | 24.462 | 41.834 | 1.00 | 0.00 | N   |
| ATOM | 5885 | CA  | ASN | C | 692 | 67.510 | 24.224 | 42.782 | 1.00 | 0.00 | C   |
| ATOM | 5886 | C   | ASN | C | 692 | 66.903 | 23.752 | 44.065 | 1.00 | 0.00 | C   |
| ATOM | 5887 | O   | ASN | C | 692 | 67.425 | 22.851 | 44.716 | 1.00 | 0.00 | O   |
| ATOM | 5888 | CB  | ASN | C | 692 | 68.336 | 25.481 | 43.090 | 1.00 | 0.00 | C   |
| ATOM | 5889 | CG  | ASN | C | 692 | 69.620 | 25.037 | 43.773 | 1.00 | 0.00 | C   |

|      |      |               |        |        |        |      |      |     |
|------|------|---------------|--------|--------|--------|------|------|-----|
| ATOM | 5890 | ND2 ASN C 692 | 70.779 | 25.499 | 43.232 | 1.00 | 0.00 | N   |
| ATOM | 5891 | OD1 ASN C 692 | 69.596 | 24.291 | 44.750 | 1.00 | 0.00 | O   |
| ATOM | 5892 | N TRP C 693   | 65.762 | 24.352 | 44.453 | 1.00 | 0.00 | N   |
| ATOM | 5893 | CA TRP C 693  | 65.176 | 24.032 | 45.721 | 1.00 | 0.00 | C   |
| ATOM | 5894 | C TRP C 693   | 64.806 | 22.586 | 45.727 | 1.00 | 0.00 | C   |
| ATOM | 5895 | O TRP C 693   | 65.024 | 21.884 | 46.712 | 1.00 | 0.00 | O   |
| ATOM | 5896 | CB TRP C 693  | 63.903 | 24.841 | 46.037 | 1.00 | 0.00 | C   |
| ATOM | 5897 | CG TRP C 693  | 62.716 | 24.571 | 45.138 | 1.00 | 0.00 | C   |
| ATOM | 5898 | CD1 TRP C 693 | 62.317 | 25.202 | 43.996 | 1.00 | 0.00 | C   |
| ATOM | 5899 | CD2 TRP C 693 | 61.741 | 23.552 | 45.401 | 1.00 | 0.00 | C   |
| ATOM | 5900 | CE2 TRP C 693 | 60.785 | 23.622 | 44.387 | 1.00 | 0.00 | C   |
| ATOM | 5901 | CE3 TRP C 693 | 61.644 | 22.635 | 46.408 | 1.00 | 0.00 | C   |
| ATOM | 5902 | NE1 TRP C 693 | 61.152 | 24.639 | 43.532 | 1.00 | 0.00 | N   |
| ATOM | 5903 | CZ2 TRP C 693 | 59.717 | 22.774 | 44.363 | 1.00 | 0.00 | C   |
| ATOM | 5904 | CZ3 TRP C 693 | 60.567 | 21.776 | 46.379 | 1.00 | 0.00 | C   |
| ATOM | 5905 | CH2 TRP C 693 | 59.621 | 21.844 | 45.377 | 1.00 | 0.00 | C   |
| ATOM | 5906 | N LYS C 694   | 64.242 | 22.101 | 44.608 | 1.00 | 0.00 | N   |
| ATOM | 5907 | CA LYS C 694  | 63.799 | 20.741 | 44.552 | 1.00 | 0.00 | C   |
| ATOM | 5908 | C LYS C 694   | 64.979 | 19.833 | 44.706 | 1.00 | 0.00 | C   |
| ATOM | 5909 | O LYS C 694   | 64.869 | 18.778 | 45.331 | 1.00 | 0.00 | O   |
| ATOM | 5910 | CB LYS C 694  | 63.061 | 20.401 | 43.246 | 1.00 | 0.00 | C   |
| ATOM | 5911 | CG LYS C 694  | 63.944 | 20.557 | 42.019 | 1.00 | 0.00 | C   |
| ATOM | 5912 | CD LYS C 694  | 63.287 | 20.166 | 40.702 | 1.00 | 0.00 | C   |
| ATOM | 5913 | CE LYS C 694  | 62.259 | 21.181 | 40.205 | 1.00 | 0.00 | C   |
| ATOM | 5914 | NZ LYS C 694  | 61.959 | 20.923 | 38.781 | 1.00 | 0.00 | NI+ |
| ATOM | 5915 | N ILE C 695   | 66.141 | 20.213 | 44.150 | 1.00 | 0.00 | N   |
| ATOM | 5916 | CA ILE C 695  | 67.305 | 19.380 | 44.235 | 1.00 | 0.00 | C   |
| ATOM | 5917 | C ILE C 695   | 67.658 | 19.244 | 45.684 | 1.00 | 0.00 | C   |
| ATOM | 5918 | O ILE C 695   | 67.940 | 18.151 | 46.173 | 1.00 | 0.00 | O   |
| ATOM | 5919 | CB ILE C 695  | 68.529 | 20.022 | 43.647 | 1.00 | 0.00 | C   |
| ATOM | 5920 | CG1 ILE C 695 | 68.297 | 20.574 | 42.238 | 1.00 | 0.00 | C   |
| ATOM | 5921 | CG2 ILE C 695 | 69.644 | 18.970 | 43.690 | 1.00 | 0.00 | C   |
| ATOM | 5922 | CD1 ILE C 695 | 69.444 | 21.472 | 41.769 | 1.00 | 0.00 | C   |
| ATOM | 5923 | N ILE C 696   | 67.657 | 20.379 | 46.405 | 1.00 | 0.00 | N   |
| ATOM | 5924 | CA ILE C 696  | 68.044 | 20.401 | 47.784 | 1.00 | 0.00 | C   |
| ATOM | 5925 | C ILE C 696   | 67.069 | 19.597 | 48.572 | 1.00 | 0.00 | C   |
| ATOM | 5926 | O ILE C 696   | 67.457 | 18.820 | 49.444 | 1.00 | 0.00 | O   |
| ATOM | 5927 | CB ILE C 696  | 68.075 | 21.785 | 48.364 | 1.00 | 0.00 | C   |
| ATOM | 5928 | CG1 ILE C 696 | 69.108 | 22.652 | 47.624 | 1.00 | 0.00 | C   |
| ATOM | 5929 | CG2 ILE C 696 | 68.346 | 21.662 | 49.874 | 1.00 | 0.00 | C   |
| ATOM | 5930 | CD1 ILE C 696 | 69.018 | 24.138 | 47.969 | 1.00 | 0.00 | C   |
| ATOM | 5931 | N LEU C 697   | 65.765 | 19.749 | 48.280 | 1.00 | 0.00 | N   |
| ATOM | 5932 | CA LEU C 697  | 64.787 | 19.032 | 49.039 | 1.00 | 0.00 | C   |
| ATOM | 5933 | C LEU C 697   | 65.081 | 17.591 | 48.824 | 1.00 | 0.00 | C   |

|      |      |     |     |   |     |        |        |        |      |      |   |
|------|------|-----|-----|---|-----|--------|--------|--------|------|------|---|
| ATOM | 5934 | O   | LEU | C | 697 | 65.138 | 16.815 | 49.773 | 1.00 | 0.00 | O |
| ATOM | 5935 | CB  | LEU | C | 697 | 63.344 | 19.321 | 48.566 | 1.00 | 0.00 | C |
| ATOM | 5936 | CG  | LEU | C | 697 | 62.204 | 18.776 | 49.461 | 1.00 | 0.00 | C |
| ATOM | 5937 | CD1 | LEU | C | 697 | 60.834 | 19.140 | 48.865 | 1.00 | 0.00 | C |
| ATOM | 5938 | CD2 | LEU | C | 697 | 62.315 | 17.271 | 49.754 | 1.00 | 0.00 | C |
| ATOM | 5939 | N   | CYS | C | 698 | 65.350 | 17.218 | 47.561 | 1.00 | 0.00 | N |
| ATOM | 5940 | CA  | CYS | C | 698 | 65.578 | 15.850 | 47.220 | 1.00 | 0.00 | C |
| ATOM | 5941 | C   | CYS | C | 698 | 66.746 | 15.373 | 48.009 | 1.00 | 0.00 | C |
| ATOM | 5942 | O   | CYS | C | 698 | 66.763 | 14.227 | 48.444 | 1.00 | 0.00 | O |
| ATOM | 5943 | CB  | CYS | C | 698 | 65.909 | 15.650 | 45.728 | 1.00 | 0.00 | C |
| ATOM | 5944 | SG  | CYS | C | 698 | 64.493 | 16.018 | 44.652 | 1.00 | 0.00 | S |
| ATOM | 5945 | N   | LEU | C | 699 | 67.726 | 16.259 | 48.250 | 1.00 | 0.00 | N |
| ATOM | 5946 | CA  | LEU | C | 699 | 68.949 | 15.899 | 48.908 | 1.00 | 0.00 | C |
| ATOM | 5947 | C   | LEU | C | 699 | 68.684 | 15.335 | 50.266 | 1.00 | 0.00 | C |
| ATOM | 5948 | O   | LEU | C | 699 | 69.338 | 14.376 | 50.667 | 1.00 | 0.00 | O |
| ATOM | 5949 | CB  | LEU | C | 699 | 69.875 | 17.103 | 49.137 | 1.00 | 0.00 | C |
| ATOM | 5950 | CG  | LEU | C | 699 | 71.191 | 16.726 | 49.841 | 1.00 | 0.00 | C |
| ATOM | 5951 | CD1 | LEU | C | 699 | 72.135 | 15.968 | 48.898 | 1.00 | 0.00 | C |
| ATOM | 5952 | CD2 | LEU | C | 699 | 71.837 | 17.943 | 50.517 | 1.00 | 0.00 | C |
| ATOM | 5953 | N   | PHE | C | 700 | 67.771 | 15.932 | 51.057 | 1.00 | 0.00 | N |
| ATOM | 5954 | CA  | PHE | C | 700 | 67.589 | 15.372 | 52.366 | 1.00 | 0.00 | C |
| ATOM | 5955 | C   | PHE | C | 700 | 66.931 | 14.020 | 52.280 | 1.00 | 0.00 | C |
| ATOM | 5956 | O   | PHE | C | 700 | 67.402 | 13.043 | 52.856 | 1.00 | 0.00 | O |
| ATOM | 5957 | CB  | PHE | C | 700 | 66.731 | 16.234 | 53.305 | 1.00 | 0.00 | C |
| ATOM | 5958 | CG  | PHE | C | 700 | 66.943 | 15.675 | 54.667 | 1.00 | 0.00 | C |
| ATOM | 5959 | CD1 | PHE | C | 700 | 67.992 | 16.121 | 55.439 | 1.00 | 0.00 | C |
| ATOM | 5960 | CD2 | PHE | C | 700 | 66.115 | 14.699 | 55.173 | 1.00 | 0.00 | C |
| ATOM | 5961 | CE1 | PHE | C | 700 | 68.210 | 15.616 | 56.697 | 1.00 | 0.00 | C |
| ATOM | 5962 | CE2 | PHE | C | 700 | 66.330 | 14.188 | 56.432 | 1.00 | 0.00 | C |
| ATOM | 5963 | CZ  | PHE | C | 700 | 67.377 | 14.645 | 57.196 | 1.00 | 0.00 | C |
| ATOM | 5964 | N   | ILE | C | 701 | 65.814 | 13.983 | 51.529 | 1.00 | 0.00 | N |
| ATOM | 5965 | CA  | ILE | C | 701 | 64.850 | 12.951 | 51.232 | 1.00 | 0.00 | C |
| ATOM | 5966 | C   | ILE | C | 701 | 65.345 | 11.856 | 50.306 | 1.00 | 0.00 | C |
| ATOM | 5967 | O   | ILE | C | 701 | 64.640 | 10.879 | 50.067 | 1.00 | 0.00 | O |
| ATOM | 5968 | CB  | ILE | C | 701 | 63.483 | 13.512 | 50.869 | 1.00 | 0.00 | C |
| ATOM | 5969 | CG1 | ILE | C | 701 | 62.445 | 12.406 | 50.618 | 1.00 | 0.00 | C |
| ATOM | 5970 | CG2 | ILE | C | 701 | 63.618 | 14.557 | 49.760 | 1.00 | 0.00 | C |
| ATOM | 5971 | CD1 | ILE | C | 701 | 62.086 | 11.606 | 51.868 | 1.00 | 0.00 | C |
| ATOM | 5972 | N   | ILE | C | 702 | 66.563 | 11.971 | 49.739 | 1.00 | 0.00 | N |
| ATOM | 5973 | CA  | ILE | C | 702 | 66.990 | 11.219 | 48.582 | 1.00 | 0.00 | C |
| ATOM | 5974 | C   | ILE | C | 702 | 66.654 | 9.753  | 48.572 | 1.00 | 0.00 | C |
| ATOM | 5975 | O   | ILE | C | 702 | 66.121 | 9.354  | 47.539 | 1.00 | 0.00 | O |
| ATOM | 5976 | CB  | ILE | C | 702 | 68.486 | 11.235 | 48.357 | 1.00 | 0.00 | C |
| ATOM | 5977 | CG1 | ILE | C | 702 | 69.213 | 10.563 | 49.531 | 1.00 | 0.00 | C |

|      |      |               |        |        |        |      |      |   |
|------|------|---------------|--------|--------|--------|------|------|---|
| ATOM | 5978 | CG2 ILE C 702 | 68.971 | 12.664 | 48.081 | 1.00 | 0.00 | C |
| ATOM | 5979 | CD1 ILE C 702 | 70.684 | 10.255 | 49.251 | 1.00 | 0.00 | C |
| ATOM | 5980 | N PRO C 703   | 66.891 | 8.910  | 49.548 | 1.00 | 0.00 | N |
| ATOM | 5981 | CA PRO C 703  | 66.630 | 7.494  | 49.387 | 1.00 | 0.00 | C |
| ATOM | 5982 | C PRO C 703   | 65.254 | 7.164  | 48.875 | 1.00 | 0.00 | C |
| ATOM | 5983 | O PRO C 703   | 65.155 | 6.394  | 47.919 | 1.00 | 0.00 | O |
| ATOM | 5984 | CB PRO C 703  | 66.857 | 6.887  | 50.768 | 1.00 | 0.00 | C |
| ATOM | 5985 | CG PRO C 703  | 66.465 | 8.030  | 51.718 | 1.00 | 0.00 | C |
| ATOM | 5986 | CD PRO C 703  | 66.852 | 9.305  | 50.947 | 1.00 | 0.00 | C |
| ATOM | 5987 | N LEU C 704   | 64.185 | 7.673  | 49.516 | 1.00 | 0.00 | N |
| ATOM | 5988 | CA LEU C 704  | 62.853 | 7.406  | 49.044 | 1.00 | 0.00 | C |
| ATOM | 5989 | C LEU C 704   | 62.525 | 8.231  | 47.827 | 1.00 | 0.00 | C |
| ATOM | 5990 | O LEU C 704   | 62.158 | 7.706  | 46.779 | 1.00 | 0.00 | O |
| ATOM | 5991 | CB LEU C 704  | 61.801 | 7.756  | 50.122 | 1.00 | 0.00 | C |
| ATOM | 5992 | CG LEU C 704  | 60.348 | 7.272  | 49.894 | 1.00 | 0.00 | C |
| ATOM | 5993 | CD1 LEU C 704 | 59.460 | 7.762  | 51.044 | 1.00 | 0.00 | C |
| ATOM | 5994 | CD2 LEU C 704 | 59.747 | 7.639  | 48.528 | 1.00 | 0.00 | C |
| ATOM | 5995 | N VAL C 705   | 62.670 | 9.565  | 47.981 | 1.00 | 0.00 | N |
| ATOM | 5996 | CA VAL C 705  | 62.239 | 10.606 | 47.075 | 1.00 | 0.00 | C |
| ATOM | 5997 | C VAL C 705   | 63.043 | 10.745 | 45.820 | 1.00 | 0.00 | C |
| ATOM | 5998 | O VAL C 705   | 62.511 | 11.142 | 44.786 | 1.00 | 0.00 | O |
| ATOM | 5999 | CB VAL C 705  | 62.276 | 11.956 | 47.710 | 1.00 | 0.00 | C |
| ATOM | 6000 | CG1 VAL C 705 | 63.753 | 12.337 | 47.871 | 1.00 | 0.00 | C |
| ATOM | 6001 | CG2 VAL C 705 | 61.465 | 12.940 | 46.850 | 1.00 | 0.00 | C |
| ATOM | 6002 | N GLY C 706   | 64.352 | 10.451 | 45.876 | 1.00 | 0.00 | N |
| ATOM | 6003 | CA GLY C 706  | 65.253 | 10.777 | 44.816 | 1.00 | 0.00 | C |
| ATOM | 6004 | C GLY C 706   | 64.869 | 10.125 | 43.526 | 1.00 | 0.00 | C |
| ATOM | 6005 | O GLY C 706   | 65.129 | 10.674 | 42.456 | 1.00 | 0.00 | O |
| ATOM | 6006 | N CYS C 707   | 64.283 | 8.921  | 43.580 | 1.00 | 0.00 | N |
| ATOM | 6007 | CA CYS C 707  | 64.045 | 8.215  | 42.359 | 1.00 | 0.00 | C |
| ATOM | 6008 | C CYS C 707   | 63.167 | 8.971  | 41.404 | 1.00 | 0.00 | C |
| ATOM | 6009 | O CYS C 707   | 63.542 | 9.178  | 40.251 | 1.00 | 0.00 | O |
| ATOM | 6010 | CB CYS C 707  | 63.373 | 6.848  | 42.581 | 1.00 | 0.00 | C |
| ATOM | 6011 | SG CYS C 707  | 64.437 | 5.661  | 43.455 | 1.00 | 0.00 | S |
| ATOM | 6012 | N GLY C 708   | 61.977 | 9.408  | 41.850 | 1.00 | 0.00 | N |
| ATOM | 6013 | CA GLY C 708  | 61.028 | 9.943  | 40.910 | 1.00 | 0.00 | C |
| ATOM | 6014 | C GLY C 708   | 61.374 | 11.264 | 40.278 | 1.00 | 0.00 | C |
| ATOM | 6015 | O GLY C 708   | 61.389 | 11.376 | 39.052 | 1.00 | 0.00 | O |
| ATOM | 6016 | N PHE C 709   | 61.666 | 12.301 | 41.085 | 1.00 | 0.00 | N |
| ATOM | 6017 | CA PHE C 709  | 61.749 | 13.618 | 40.510 | 1.00 | 0.00 | C |
| ATOM | 6018 | C PHE C 709   | 62.963 | 13.875 | 39.680 | 1.00 | 0.00 | C |
| ATOM | 6019 | O PHE C 709   | 62.858 | 14.487 | 38.619 | 1.00 | 0.00 | O |
| ATOM | 6020 | CB PHE C 709  | 61.670 | 14.774 | 41.518 | 1.00 | 0.00 | C |
| ATOM | 6021 | CG PHE C 709  | 61.406 | 15.967 | 40.661 | 1.00 | 0.00 | C |

|      |      |               |        |        |        |      |      |   |
|------|------|---------------|--------|--------|--------|------|------|---|
| ATOM | 6022 | CD1 PHE C 709 | 60.112 | 16.308 | 40.344 | 1.00 | 0.00 | C |
| ATOM | 6023 | CD2 PHE C 709 | 62.431 | 16.729 | 40.151 | 1.00 | 0.00 | C |
| ATOM | 6024 | CE1 PHE C 709 | 59.842 | 17.395 | 39.547 | 1.00 | 0.00 | C |
| ATOM | 6025 | CE2 PHE C 709 | 62.166 | 17.813 | 39.346 | 1.00 | 0.00 | C |
| ATOM | 6026 | CZ PHE C 709  | 60.872 | 18.151 | 39.042 | 1.00 | 0.00 | C |
| ATOM | 6027 | N VAL C 710   | 64.148 | 13.420 | 40.127 | 1.00 | 0.00 | N |
| ATOM | 6028 | CA VAL C 710  | 65.351 | 13.855 | 39.479 | 1.00 | 0.00 | C |
| ATOM | 6029 | C VAL C 710   | 65.345 | 13.512 | 38.020 | 1.00 | 0.00 | C |
| ATOM | 6030 | O VAL C 710   | 65.214 | 12.358 | 37.609 | 1.00 | 0.00 | O |
| ATOM | 6031 | CB VAL C 710  | 66.601 | 13.276 | 40.074 | 1.00 | 0.00 | C |
| ATOM | 6032 | CG1 VAL C 710 | 66.680 | 13.695 | 41.542 | 1.00 | 0.00 | C |
| ATOM | 6033 | CG2 VAL C 710 | 66.591 | 11.757 | 39.878 | 1.00 | 0.00 | C |
| ATOM | 6034 | N SER C 711   | 65.502 | 14.555 | 37.185 | 1.00 | 0.00 | N |
| ATOM | 6035 | CA SER C 711  | 65.588 | 14.298 | 35.784 | 1.00 | 0.00 | C |
| ATOM | 6036 | C SER C 711   | 67.019 | 14.521 | 35.439 | 1.00 | 0.00 | C |
| ATOM | 6037 | O SER C 711   | 67.432 | 15.625 | 35.099 | 1.00 | 0.00 | O |
| ATOM | 6038 | CB SER C 711  | 64.786 | 15.289 | 34.918 | 1.00 | 0.00 | C |
| ATOM | 6039 | OG SER C 711  | 63.399 | 15.195 | 35.203 | 1.00 | 0.00 | O |
| ATOM | 6040 | N PHE C 712   | 67.813 | 13.445 | 35.512 | 1.00 | 0.00 | N |
| ATOM | 6041 | CA PHE C 712  | 69.206 | 13.509 | 35.203 | 1.00 | 0.00 | C |
| ATOM | 6042 | C PHE C 712   | 69.384 | 13.023 | 33.808 | 1.00 | 0.00 | C |
| ATOM | 6043 | O PHE C 712   | 68.418 | 12.602 | 33.171 | 1.00 | 0.00 | O |
| ATOM | 6044 | CB PHE C 712  | 70.063 | 12.693 | 36.193 | 1.00 | 0.00 | C |
| ATOM | 6045 | CG PHE C 712  | 69.504 | 11.311 | 36.289 | 1.00 | 0.00 | C |
| ATOM | 6046 | CD1 PHE C 712 | 68.339 | 11.085 | 36.984 | 1.00 | 0.00 | C |
| ATOM | 6047 | CD2 PHE C 712 | 70.149 | 10.240 | 35.717 | 1.00 | 0.00 | C |
| ATOM | 6048 | CE1 PHE C 712 | 67.814 | 9.818  | 37.084 | 1.00 | 0.00 | C |
| ATOM | 6049 | CE2 PHE C 712 | 69.628 | 8.970  | 35.812 | 1.00 | 0.00 | C |
| ATOM | 6050 | CZ PHE C 712  | 68.458 | 8.755  | 36.495 | 1.00 | 0.00 | C |
| ATOM | 6051 | N ARG C 713   | 70.632 | 13.110 | 33.285 | 1.00 | 0.00 | N |
| ATOM | 6052 | CA ARG C 713  | 70.918 | 12.608 | 31.969 | 1.00 | 0.00 | C |
| ATOM | 6053 | C ARG C 713   | 70.408 | 11.194 | 31.966 | 1.00 | 0.00 | C |
| ATOM | 6054 | O ARG C 713   | 70.270 | 10.570 | 33.011 | 1.00 | 0.00 | O |
| ATOM | 6055 | CB ARG C 713  | 72.414 | 12.613 | 31.601 | 1.00 | 0.00 | C |
| ATOM | 6056 | CG ARG C 713  | 72.957 | 14.029 | 31.371 | 1.00 | 0.00 | C |
| ATOM | 6057 | CD ARG C 713  | 74.406 | 14.077 | 30.872 | 1.00 | 0.00 | C |
| ATOM | 6058 | NE ARG C 713  | 74.716 | 15.501 | 30.556 | 1.00 | 0.00 | N |
| ATOM | 6059 | CZ ARG C 713  | 75.759 | 15.817 | 29.735 | 1.00 | 0.00 | C |
| ATOM | 6060 | NH1 ARG C 713 | 76.555 | 14.832 | 29.227 | 1.00 | 0.00 | N |
| ATOM | 6061 | NH2 ARG C 713 | 76.001 | 17.121 | 29.414 | 1.00 | 0.00 | N |
| ATOM | 6062 | N LYS C 714   | 70.183 | 10.622 | 30.782 | 1.00 | 0.00 | N |
| ATOM | 6063 | CA LYS C 714  | 69.322 | 9.483  | 30.597 | 1.00 | 0.00 | C |
| ATOM | 6064 | C LYS C 714   | 69.479 | 8.305  | 31.538 | 1.00 | 0.00 | C |
| ATOM | 6065 | O LYS C 714   | 68.467 | 7.888  | 32.088 | 1.00 | 0.00 | O |



|      |      |     |     |   |     |        |        |        |      |      |     |
|------|------|-----|-----|---|-----|--------|--------|--------|------|------|-----|
| ATOM | 6066 | CB  | LYS | C | 714 | 69.441 | 8.943  | 29.163 | 1.00 | 0.00 | C   |
| ATOM | 6067 | CG  | LYS | C | 714 | 68.367 | 7.928  | 28.783 | 1.00 | 0.00 | C   |
| ATOM | 6068 | CD  | LYS | C | 714 | 68.305 | 7.667  | 27.276 | 1.00 | 0.00 | C   |
| ATOM | 6069 | CE  | LYS | C | 714 | 67.243 | 6.646  | 26.871 | 1.00 | 0.00 | C   |
| ATOM | 6070 | NZ  | LYS | C | 714 | 67.273 | 6.446  | 25.405 | 1.00 | 0.00 | N1+ |
| ATOM | 6071 | N   | LYS | C | 715 | 70.682 | 7.750  | 31.784 | 1.00 | 0.00 | N   |
| ATOM | 6072 | CA  | LYS | C | 715 | 70.898 | 6.546  | 32.578 | 1.00 | 0.00 | C   |
| ATOM | 6073 | C   | LYS | C | 715 | 69.807 | 5.520  | 32.383 | 1.00 | 0.00 | C   |
| ATOM | 6074 | O   | LYS | C | 715 | 69.002 | 5.264  | 33.279 | 1.00 | 0.00 | O   |
| ATOM | 6075 | CB  | LYS | C | 715 | 70.974 | 6.846  | 34.080 | 1.00 | 0.00 | C   |
| ATOM | 6076 | CG  | LYS | C | 715 | 72.017 | 7.910  | 34.405 | 1.00 | 0.00 | C   |
| ATOM | 6077 | CD  | LYS | C | 715 | 73.428 | 7.523  | 33.975 | 1.00 | 0.00 | C   |
| ATOM | 6078 | CE  | LYS | C | 715 | 74.246 | 6.942  | 35.124 | 1.00 | 0.00 | C   |
| ATOM | 6079 | NZ  | LYS | C | 715 | 73.542 | 5.772  | 35.692 | 1.00 | 0.00 | N1+ |
| ATOM | 6080 | N   | PRO | C | 716 | 69.819 | 4.886  | 31.234 | 1.00 | 0.00 | N   |
| ATOM | 6081 | CA  | PRO | C | 716 | 68.830 | 3.913  | 30.826 | 1.00 | 0.00 | C   |
| ATOM | 6082 | C   | PRO | C | 716 | 68.895 | 2.528  | 31.394 | 1.00 | 0.00 | C   |
| ATOM | 6083 | O   | PRO | C | 716 | 67.968 | 1.769  | 31.118 | 1.00 | 0.00 | O   |
| ATOM | 6084 | CB  | PRO | C | 716 | 68.886 | 3.876  | 29.297 | 1.00 | 0.00 | C   |
| ATOM | 6085 | CG  | PRO | C | 716 | 70.279 | 4.426  | 28.953 | 1.00 | 0.00 | C   |
| ATOM | 6086 | CD  | PRO | C | 716 | 70.567 | 5.401  | 30.099 | 1.00 | 0.00 | C   |
| ATOM | 6087 | N   | VAL | C | 717 | 69.942 | 2.148  | 32.159 | 1.00 | 0.00 | N   |
| ATOM | 6088 | CA  | VAL | C | 717 | 70.074 | 0.764  | 32.546 | 1.00 | 0.00 | C   |
| ATOM | 6089 | C   | VAL | C | 717 | 68.837 | 0.280  | 33.233 | 1.00 | 0.00 | C   |
| ATOM | 6090 | O   | VAL | C | 717 | 68.313 | 0.920  | 34.142 | 1.00 | 0.00 | O   |
| ATOM | 6091 | CB  | VAL | C | 717 | 71.235 | 0.500  | 33.460 | 1.00 | 0.00 | C   |
| ATOM | 6092 | CG1 | VAL | C | 717 | 70.996 | 1.240  | 34.786 | 1.00 | 0.00 | C   |
| ATOM | 6093 | CG2 | VAL | C | 717 | 71.392 | -1.024 | 33.615 | 1.00 | 0.00 | C   |
| ATOM | 6094 | N   | ASP | C | 718 | 68.327 | -0.881 | 32.769 | 1.00 | 0.00 | N   |
| ATOM | 6095 | CA  | ASP | C | 718 | 67.149 | -1.489 | 33.316 | 1.00 | 0.00 | C   |
| ATOM | 6096 | C   | ASP | C | 718 | 67.545 | -2.491 | 34.338 | 1.00 | 0.00 | C   |
| ATOM | 6097 | O   | ASP | C | 718 | 68.630 | -2.430 | 34.912 | 1.00 | 0.00 | O   |
| ATOM | 6098 | CB  | ASP | C | 718 | 66.265 | -2.226 | 32.295 | 1.00 | 0.00 | C   |
| ATOM | 6099 | CG  | ASP | C | 718 | 65.346 | -1.205 | 31.663 | 1.00 | 0.00 | C   |
| ATOM | 6100 | OD1 | ASP | C | 718 | 65.185 | -0.113 | 32.269 | 1.00 | 0.00 | O   |
| ATOM | 6101 | OD2 | ASP | C | 718 | 64.775 | -1.502 | 30.579 | 1.00 | 0.00 | O   |
| ATOM | 6102 | N   | LYS | C | 719 | 66.627 | -3.443 | 34.589 | 1.00 | 0.00 | N   |
| ATOM | 6103 | CA  | LYS | C | 719 | 66.856 | -4.464 | 35.564 | 1.00 | 0.00 | C   |
| ATOM | 6104 | C   | LYS | C | 719 | 66.945 | -3.789 | 36.885 | 1.00 | 0.00 | C   |
| ATOM | 6105 | O   | LYS | C | 719 | 67.532 | -4.317 | 37.830 | 1.00 | 0.00 | O   |
| ATOM | 6106 | CB  | LYS | C | 719 | 68.175 | -5.219 | 35.333 | 1.00 | 0.00 | C   |
| ATOM | 6107 | CG  | LYS | C | 719 | 68.170 | -6.119 | 34.096 | 1.00 | 0.00 | C   |
| ATOM | 6108 | CD  | LYS | C | 719 | 67.220 | -7.312 | 34.213 | 1.00 | 0.00 | C   |
| ATOM | 6109 | CE  | LYS | C | 719 | 67.757 | -8.415 | 35.130 | 1.00 | 0.00 | C   |

|             |     |           |        |        |        |      |      |     |
|-------------|-----|-----------|--------|--------|--------|------|------|-----|
| ATOM 6110   | NZ  | LYS C 719 | 66.795 | -9.540 | 35.196 | 1.00 | 0.00 | N1+ |
| HETATM 6111 | N   | HIE C 720 | 66.339 | -2.594 | 36.977 | 1.00 | 0.00 | N   |
| HETATM 6112 | CA  | HIE C 720 | 66.350 | -1.829 | 38.190 | 1.00 | 0.00 | C   |
| HETATM 6113 | C   | HIE C 720 | 67.771 | -1.526 | 38.525 | 1.00 | 0.00 | C   |
| HETATM 6114 | O   | HIE C 720 | 68.090 | -1.171 | 39.658 | 1.00 | 0.00 | O   |
| HETATM 6115 | CB  | HIE C 720 | 65.717 | -2.576 | 39.377 | 1.00 | 0.00 | C   |
| HETATM 6116 | CG  | HIE C 720 | 64.244 | -2.797 | 39.212 | 1.00 | 0.00 | C   |
| HETATM 6117 | CD2 | HIE C 720 | 63.563 | -3.846 | 38.671 | 1.00 | 0.00 | C   |
| HETATM 6118 | ND1 | HIE C 720 | 63.281 | -1.895 | 39.611 | 1.00 | 0.00 | N   |
| HETATM 6119 | CE1 | HIE C 720 | 62.080 | -2.436 | 39.296 | 1.00 | 0.00 | C   |
| HETATM 6120 | NE2 | HIE C 720 | 62.200 | -3.620 | 38.722 | 1.00 | 0.00 | N   |
| ATOM 6121   | N   | LYS C 721 | 68.662 | -1.653 | 37.526 | 1.00 | 0.00 | N   |
| ATOM 6122   | CA  | LYS C 721 | 70.036 | -1.292 | 37.700 | 1.00 | 0.00 | C   |
| ATOM 6123   | C   | LYS C 721 | 70.039 | 0.185  | 37.841 | 1.00 | 0.00 | C   |
| ATOM 6124   | O   | LYS C 721 | 70.807 | 0.762  | 38.603 | 1.00 | 0.00 | O   |
| ATOM 6125   | CB  | LYS C 721 | 70.918 | -1.600 | 36.478 | 1.00 | 0.00 | C   |
| ATOM 6126   | CG  | LYS C 721 | 71.474 | -3.020 | 36.428 | 1.00 | 0.00 | C   |
| ATOM 6127   | CD  | LYS C 721 | 72.483 | -3.314 | 37.539 | 1.00 | 0.00 | C   |
| ATOM 6128   | CE  | LYS C 721 | 71.905 | -3.205 | 38.949 | 1.00 | 0.00 | C   |
| ATOM 6129   | NZ  | LYS C 721 | 72.952 | -3.498 | 39.952 | 1.00 | 0.00 | N1+ |
| ATOM 6130   | N   | LYS C 722 | 69.110 | 0.821  | 37.110 | 1.00 | 0.00 | N   |
| ATOM 6131   | CA  | LYS C 722 | 69.075 | 2.242  | 36.986 | 1.00 | 0.00 | C   |
| ATOM 6132   | C   | LYS C 722 | 68.960 | 2.903  | 38.318 | 1.00 | 0.00 | C   |
| ATOM 6133   | O   | LYS C 722 | 69.615 | 3.914  | 38.555 | 1.00 | 0.00 | O   |
| ATOM 6134   | CB  | LYS C 722 | 67.895 | 2.747  | 36.138 | 1.00 | 0.00 | C   |
| ATOM 6135   | CG  | LYS C 722 | 66.520 | 2.404  | 36.717 | 1.00 | 0.00 | C   |
| ATOM 6136   | CD  | LYS C 722 | 66.262 | 0.901  | 36.837 | 1.00 | 0.00 | C   |
| ATOM 6137   | CE  | LYS C 722 | 64.853 | 0.565  | 37.332 | 1.00 | 0.00 | C   |
| ATOM 6138   | NZ  | LYS C 722 | 63.884 | 0.671  | 36.216 | 1.00 | 0.00 | N1+ |
| ATOM 6139   | N   | LEU C 723 | 68.143 | 2.361  | 39.235 | 1.00 | 0.00 | N   |
| ATOM 6140   | CA  | LEU C 723 | 67.927 | 3.050  | 40.472 | 1.00 | 0.00 | C   |
| ATOM 6141   | C   | LEU C 723 | 69.231 | 3.214  | 41.202 | 1.00 | 0.00 | C   |
| ATOM 6142   | O   | LEU C 723 | 69.584 | 4.322  | 41.602 | 1.00 | 0.00 | O   |
| ATOM 6143   | CB  | LEU C 723 | 66.921 | 2.279  | 41.363 | 1.00 | 0.00 | C   |
| ATOM 6144   | CG  | LEU C 723 | 66.512 | 2.910  | 42.714 | 1.00 | 0.00 | C   |
| ATOM 6145   | CD1 | LEU C 723 | 65.385 | 2.090  | 43.360 | 1.00 | 0.00 | C   |
| ATOM 6146   | CD2 | LEU C 723 | 67.689 | 3.068  | 43.689 | 1.00 | 0.00 | C   |
| ATOM 6147   | N   | LEU C 724 | 70.004 | 2.119  | 41.363 | 1.00 | 0.00 | N   |
| ATOM 6148   | CA  | LEU C 724 | 71.221 | 2.190  | 42.126 | 1.00 | 0.00 | C   |
| ATOM 6149   | C   | LEU C 724 | 72.192 | 3.088  | 41.441 | 1.00 | 0.00 | C   |
| ATOM 6150   | O   | LEU C 724 | 72.800 | 3.960  | 42.063 | 1.00 | 0.00 | O   |
| ATOM 6151   | CB  | LEU C 724 | 71.934 | 0.830  | 42.251 | 1.00 | 0.00 | C   |
| ATOM 6152   | CG  | LEU C 724 | 71.125 | -0.244 | 42.998 | 1.00 | 0.00 | C   |
| ATOM 6153   | CD1 | LEU C 724 | 70.892 | 0.157  | 44.464 | 1.00 | 0.00 | C   |

|      |      |     |     |   |     |        |        |        |      |      |   |
|------|------|-----|-----|---|-----|--------|--------|--------|------|------|---|
| ATOM | 6154 | CD2 | LEU | C | 724 | 69.832 | -0.594 | 42.249 | 1.00 | 0.00 | C |
| ATOM | 6155 | N   | TRP | C | 725 | 72.341 | 2.911  | 40.118 | 1.00 | 0.00 | N |
| ATOM | 6156 | CA  | TRP | C | 725 | 73.299 | 3.667  | 39.378 | 1.00 | 0.00 | C |
| ATOM | 6157 | C   | TRP | C | 725 | 72.913 | 5.107  | 39.462 | 1.00 | 0.00 | C |
| ATOM | 6158 | O   | TRP | C | 725 | 73.763 | 5.983  | 39.605 | 1.00 | 0.00 | O |
| ATOM | 6159 | CB  | TRP | C | 725 | 73.373 | 3.257  | 37.897 | 1.00 | 0.00 | C |
| ATOM | 6160 | CG  | TRP | C | 725 | 73.959 | 1.881  | 37.664 | 1.00 | 0.00 | C |
| ATOM | 6161 | CD1 | TRP | C | 725 | 73.334 | 0.672  | 37.558 | 1.00 | 0.00 | C |
| ATOM | 6162 | CD2 | TRP | C | 725 | 75.365 | 1.622  | 37.517 | 1.00 | 0.00 | C |
| ATOM | 6163 | CE2 | TRP | C | 725 | 75.511 | 0.246  | 37.329 | 1.00 | 0.00 | C |
| ATOM | 6164 | CE3 | TRP | C | 725 | 76.443 | 2.459  | 37.538 | 1.00 | 0.00 | C |
| ATOM | 6165 | NE1 | TRP | C | 725 | 74.256 | -0.323 | 37.359 | 1.00 | 0.00 | N |
| ATOM | 6166 | CZ2 | TRP | C | 725 | 76.746 | -0.316 | 37.159 | 1.00 | 0.00 | C |
| ATOM | 6167 | CZ3 | TRP | C | 725 | 77.685 | 1.889  | 37.362 | 1.00 | 0.00 | C |
| ATOM | 6168 | CH2 | TRP | C | 725 | 77.833 | 0.529  | 37.179 | 1.00 | 0.00 | C |
| ATOM | 6169 | N   | TYR | C | 726 | 71.603 | 5.391  | 39.399 | 1.00 | 0.00 | N |
| ATOM | 6170 | CA  | TYR | C | 726 | 71.171 | 6.752  | 39.437 | 1.00 | 0.00 | C |
| ATOM | 6171 | C   | TYR | C | 726 | 71.595 | 7.388  | 40.715 | 1.00 | 0.00 | C |
| ATOM | 6172 | O   | TYR | C | 726 | 72.092 | 8.513  | 40.709 | 1.00 | 0.00 | O |
| ATOM | 6173 | CB  | TYR | C | 726 | 69.650 | 6.950  | 39.364 | 1.00 | 0.00 | C |
| ATOM | 6174 | CG  | TYR | C | 726 | 69.469 | 8.322  | 39.918 | 1.00 | 0.00 | C |
| ATOM | 6175 | CD1 | TYR | C | 726 | 69.870 | 9.429  | 39.204 | 1.00 | 0.00 | C |
| ATOM | 6176 | CD2 | TYR | C | 726 | 68.901 | 8.491  | 41.159 | 1.00 | 0.00 | C |
| ATOM | 6177 | CE1 | TYR | C | 726 | 69.714 | 10.687 | 39.730 | 1.00 | 0.00 | C |
| ATOM | 6178 | CE2 | TYR | C | 726 | 68.743 | 9.746  | 41.690 | 1.00 | 0.00 | C |
| ATOM | 6179 | CZ  | TYR | C | 726 | 69.152 | 10.844 | 40.972 | 1.00 | 0.00 | C |
| ATOM | 6180 | OH  | TYR | C | 726 | 68.986 | 12.133 | 41.513 | 1.00 | 0.00 | O |
| ATOM | 6181 | N   | TYR | C | 727 | 71.415 | 6.694  | 41.849 | 1.00 | 0.00 | N |
| ATOM | 6182 | CA  | TYR | C | 727 | 71.751 | 7.311  | 43.098 | 1.00 | 0.00 | C |
| ATOM | 6183 | C   | TYR | C | 727 | 73.204 | 7.640  | 43.137 | 1.00 | 0.00 | C |
| ATOM | 6184 | O   | TYR | C | 727 | 73.575 | 8.732  | 43.568 | 1.00 | 0.00 | O |
| ATOM | 6185 | CB  | TYR | C | 727 | 71.412 | 6.454  | 44.331 | 1.00 | 0.00 | C |
| ATOM | 6186 | CG  | TYR | C | 727 | 69.959 | 6.628  | 44.600 | 1.00 | 0.00 | C |
| ATOM | 6187 | CD1 | TYR | C | 727 | 69.541 | 7.711  | 45.334 | 1.00 | 0.00 | C |
| ATOM | 6188 | CD2 | TYR | C | 727 | 69.019 | 5.739  | 44.132 | 1.00 | 0.00 | C |
| ATOM | 6189 | CE1 | TYR | C | 727 | 68.207 | 7.910  | 45.604 | 1.00 | 0.00 | C |
| ATOM | 6190 | CE2 | TYR | C | 727 | 67.683 | 5.931  | 44.398 | 1.00 | 0.00 | C |
| ATOM | 6191 | CZ  | TYR | C | 727 | 67.278 | 7.018  | 45.136 | 1.00 | 0.00 | C |
| ATOM | 6192 | OH  | TYR | C | 727 | 65.909 | 7.220  | 45.415 | 1.00 | 0.00 | O |
| ATOM | 6193 | N   | VAL | C | 728 | 74.077 | 6.726  | 42.687 | 1.00 | 0.00 | N |
| ATOM | 6194 | CA  | VAL | C | 728 | 75.474 | 7.034  | 42.775 | 1.00 | 0.00 | C |
| ATOM | 6195 | C   | VAL | C | 728 | 75.751 | 8.236  | 41.922 | 1.00 | 0.00 | C |
| ATOM | 6196 | O   | VAL | C | 728 | 76.487 | 9.136  | 42.327 | 1.00 | 0.00 | O |
| ATOM | 6197 | CB  | VAL | C | 728 | 76.376 | 5.913  | 42.331 | 1.00 | 0.00 | C |

|      |      |               |        |        |        |      |      |   |
|------|------|---------------|--------|--------|--------|------|------|---|
| ATOM | 6198 | CG1 VAL C 728 | 76.198 | 5.669  | 40.824 | 1.00 | 0.00 | C |
| ATOM | 6199 | CG2 VAL C 728 | 77.819 | 6.273  | 42.729 | 1.00 | 0.00 | C |
| ATOM | 6200 | N ALA C 729   | 75.145 | 8.292  | 40.720 | 1.00 | 0.00 | N |
| ATOM | 6201 | CA ALA C 729  | 75.355 | 9.373  | 39.800 | 1.00 | 0.00 | C |
| ATOM | 6202 | C ALA C 729   | 74.879 | 10.640 | 40.432 | 1.00 | 0.00 | C |
| ATOM | 6203 | O ALA C 729   | 75.465 | 11.703 | 40.239 | 1.00 | 0.00 | O |
| ATOM | 6204 | CB ALA C 729  | 74.590 | 9.198  | 38.477 | 1.00 | 0.00 | C |
| ATOM | 6205 | N PHE C 730   | 73.771 | 10.568 | 41.192 | 1.00 | 0.00 | N |
| ATOM | 6206 | CA PHE C 730  | 73.265 | 11.742 | 41.839 | 1.00 | 0.00 | C |
| ATOM | 6207 | C PHE C 730   | 74.297 | 12.211 | 42.814 | 1.00 | 0.00 | C |
| ATOM | 6208 | O PHE C 730   | 74.552 | 13.408 | 42.933 | 1.00 | 0.00 | O |
| ATOM | 6209 | CB PHE C 730  | 71.964 | 11.481 | 42.619 | 1.00 | 0.00 | C |
| ATOM | 6210 | CG PHE C 730  | 71.569 | 12.762 | 43.272 | 1.00 | 0.00 | C |
| ATOM | 6211 | CD1 PHE C 730 | 70.984 | 13.771 | 42.542 | 1.00 | 0.00 | C |
| ATOM | 6212 | CD2 PHE C 730 | 71.776 | 12.955 | 44.620 | 1.00 | 0.00 | C |
| ATOM | 6213 | CE1 PHE C 730 | 70.613 | 14.951 | 43.142 | 1.00 | 0.00 | C |
| ATOM | 6214 | CE2 PHE C 730 | 71.410 | 14.131 | 45.224 | 1.00 | 0.00 | C |
| ATOM | 6215 | CZ PHE C 730  | 70.827 | 15.134 | 44.487 | 1.00 | 0.00 | C |
| ATOM | 6216 | N PHE C 731   | 74.927 | 11.259 | 43.525 | 1.00 | 0.00 | N |
| ATOM | 6217 | CA PHE C 731  | 75.914 | 11.543 | 44.524 | 1.00 | 0.00 | C |
| ATOM | 6218 | C PHE C 731   | 77.121 | 12.175 | 43.910 | 1.00 | 0.00 | C |
| ATOM | 6219 | O PHE C 731   | 77.811 | 12.945 | 44.573 | 1.00 | 0.00 | O |
| ATOM | 6220 | CB PHE C 731  | 76.374 | 10.311 | 45.325 | 1.00 | 0.00 | C |
| ATOM | 6221 | CG PHE C 731  | 75.339 | 10.030 | 46.363 | 1.00 | 0.00 | C |
| ATOM | 6222 | CD1 PHE C 731 | 75.345 | 10.739 | 47.540 | 1.00 | 0.00 | C |
| ATOM | 6223 | CD2 PHE C 731 | 74.378 | 9.066  | 46.172 | 1.00 | 0.00 | C |
| ATOM | 6224 | CE1 PHE C 731 | 74.404 | 10.500 | 48.516 | 1.00 | 0.00 | C |
| ATOM | 6225 | CE2 PHE C 731 | 73.434 | 8.821  | 47.143 | 1.00 | 0.00 | C |
| ATOM | 6226 | CZ PHE C 731  | 73.444 | 9.537  | 48.315 | 1.00 | 0.00 | C |
| ATOM | 6227 | N THR C 732   | 77.435 | 11.844 | 42.645 | 1.00 | 0.00 | N |
| ATOM | 6228 | CA THR C 732  | 78.627 | 12.348 | 42.022 | 1.00 | 0.00 | C |
| ATOM | 6229 | C THR C 732   | 78.595 | 13.844 | 41.874 | 1.00 | 0.00 | C |
| ATOM | 6230 | O THR C 732   | 79.642 | 14.483 | 41.960 | 1.00 | 0.00 | O |
| ATOM | 6231 | CB THR C 732  | 78.900 | 11.779 | 40.657 | 1.00 | 0.00 | C |
| ATOM | 6232 | CG2 THR C 732 | 78.886 | 10.242 | 40.757 | 1.00 | 0.00 | C |
| ATOM | 6233 | OG1 THR C 732 | 77.930 | 12.220 | 39.721 | 1.00 | 0.00 | O |
| ATOM | 6234 | N SER C 733   | 77.418 | 14.460 | 41.633 | 1.00 | 0.00 | N |
| ATOM | 6235 | CA SER C 733  | 77.387 | 15.875 | 41.352 | 1.00 | 0.00 | C |
| ATOM | 6236 | C SER C 733   | 77.965 | 16.672 | 42.483 | 1.00 | 0.00 | C |
| ATOM | 6237 | O SER C 733   | 77.665 | 16.464 | 43.657 | 1.00 | 0.00 | O |
| ATOM | 6238 | CB SER C 733  | 75.974 | 16.421 | 41.064 | 1.00 | 0.00 | C |
| ATOM | 6239 | OG SER C 733  | 75.168 | 16.346 | 42.229 | 1.00 | 0.00 | O |
| ATOM | 6240 | N PRO C 734   | 78.821 | 17.592 | 42.112 | 1.00 | 0.00 | N |
| ATOM | 6241 | CA PRO C 734  | 79.461 | 18.475 | 43.053 | 1.00 | 0.00 | C |

|      |      |     |           |        |        |        |      |      |   |
|------|------|-----|-----------|--------|--------|--------|------|------|---|
| ATOM | 6242 | C   | PRO C 734 | 78.514 | 19.448 | 43.668 | 1.00 | 0.00 | C |
| ATOM | 6243 | O   | PRO C 734 | 78.795 | 19.933 | 44.762 | 1.00 | 0.00 | O |
| ATOM | 6244 | CB  | PRO C 734 | 80.596 | 19.155 | 42.291 | 1.00 | 0.00 | C |
| ATOM | 6245 | CG  | PRO C 734 | 80.945 | 18.150 | 41.181 | 1.00 | 0.00 | C |
| ATOM | 6246 | CD  | PRO C 734 | 79.628 | 17.402 | 40.916 | 1.00 | 0.00 | C |
| ATOM | 6247 | N   | PHE C 735 | 77.409 | 19.779 | 42.974 | 1.00 | 0.00 | N |
| ATOM | 6248 | CA  | PHE C 735 | 76.473 | 20.717 | 43.515 | 1.00 | 0.00 | C |
| ATOM | 6249 | C   | PHE C 735 | 75.893 | 20.112 | 44.746 | 1.00 | 0.00 | C |
| ATOM | 6250 | O   | PHE C 735 | 75.805 | 20.759 | 45.790 | 1.00 | 0.00 | O |
| ATOM | 6251 | CB  | PHE C 735 | 75.309 | 21.024 | 42.554 | 1.00 | 0.00 | C |
| ATOM | 6252 | CG  | PHE C 735 | 74.406 | 22.002 | 43.229 | 1.00 | 0.00 | C |
| ATOM | 6253 | CD1 | PHE C 735 | 74.702 | 23.343 | 43.243 | 1.00 | 0.00 | C |
| ATOM | 6254 | CD2 | PHE C 735 | 73.255 | 21.568 | 43.844 | 1.00 | 0.00 | C |
| ATOM | 6255 | CE1 | PHE C 735 | 73.860 | 24.238 | 43.866 | 1.00 | 0.00 | C |
| ATOM | 6256 | CE2 | PHE C 735 | 72.410 | 22.453 | 44.470 | 1.00 | 0.00 | C |
| ATOM | 6257 | CZ  | PHE C 735 | 72.717 | 23.794 | 44.482 | 1.00 | 0.00 | C |
| ATOM | 6258 | N   | VAL C 736 | 75.488 | 18.832 | 44.658 | 1.00 | 0.00 | N |
| ATOM | 6259 | CA  | VAL C 736 | 74.899 | 18.199 | 45.796 | 1.00 | 0.00 | C |
| ATOM | 6260 | C   | VAL C 736 | 75.949 | 18.068 | 46.849 | 1.00 | 0.00 | C |
| ATOM | 6261 | O   | VAL C 736 | 75.676 | 18.234 | 48.033 | 1.00 | 0.00 | O |
| ATOM | 6262 | CB  | VAL C 736 | 74.330 | 16.835 | 45.519 | 1.00 | 0.00 | C |
| ATOM | 6263 | CG1 | VAL C 736 | 73.238 | 16.981 | 44.447 | 1.00 | 0.00 | C |
| ATOM | 6264 | CG2 | VAL C 736 | 75.457 | 15.856 | 45.161 | 1.00 | 0.00 | C |
| ATOM | 6265 | N   | VAL C 737 | 77.193 | 17.771 | 46.429 | 1.00 | 0.00 | N |
| ATOM | 6266 | CA  | VAL C 737 | 78.263 | 17.586 | 47.362 | 1.00 | 0.00 | C |
| ATOM | 6267 | C   | VAL C 737 | 78.473 | 18.861 | 48.114 | 1.00 | 0.00 | C |
| ATOM | 6268 | O   | VAL C 737 | 78.653 | 18.844 | 49.328 | 1.00 | 0.00 | O |
| ATOM | 6269 | CB  | VAL C 737 | 79.564 | 17.240 | 46.695 | 1.00 | 0.00 | C |
| ATOM | 6270 | CG1 | VAL C 737 | 80.662 | 17.161 | 47.768 | 1.00 | 0.00 | C |
| ATOM | 6271 | CG2 | VAL C 737 | 79.374 | 15.939 | 45.896 | 1.00 | 0.00 | C |
| ATOM | 6272 | N   | PHE C 738 | 78.447 | 20.004 | 47.406 | 1.00 | 0.00 | N |
| ATOM | 6273 | CA  | PHE C 738 | 78.685 | 21.267 | 48.041 | 1.00 | 0.00 | C |
| ATOM | 6274 | C   | PHE C 738 | 77.620 | 21.531 | 49.053 | 1.00 | 0.00 | C |
| ATOM | 6275 | O   | PHE C 738 | 77.914 | 21.894 | 50.191 | 1.00 | 0.00 | O |
| ATOM | 6276 | CB  | PHE C 738 | 78.673 | 22.444 | 47.050 | 1.00 | 0.00 | C |
| ATOM | 6277 | CG  | PHE C 738 | 78.903 | 23.683 | 47.843 | 1.00 | 0.00 | C |
| ATOM | 6278 | CD1 | PHE C 738 | 80.172 | 24.047 | 48.226 | 1.00 | 0.00 | C |
| ATOM | 6279 | CD2 | PHE C 738 | 77.845 | 24.484 | 48.199 | 1.00 | 0.00 | C |
| ATOM | 6280 | CE1 | PHE C 738 | 80.380 | 25.194 | 48.957 | 1.00 | 0.00 | C |
| ATOM | 6281 | CE2 | PHE C 738 | 78.047 | 25.633 | 48.929 | 1.00 | 0.00 | C |
| ATOM | 6282 | CZ  | PHE C 738 | 79.317 | 25.988 | 49.310 | 1.00 | 0.00 | C |
| ATOM | 6283 | N   | SER C 739 | 76.348 | 21.338 | 48.669 | 1.00 | 0.00 | N |
| ATOM | 6284 | CA  | SER C 739 | 75.258 | 21.618 | 49.559 | 1.00 | 0.00 | C |
| ATOM | 6285 | C   | SER C 739 | 75.359 | 20.694 | 50.728 | 1.00 | 0.00 | C |

|      |      |     |           |        |        |        |      |      |   |
|------|------|-----|-----------|--------|--------|--------|------|------|---|
| ATOM | 6286 | O   | SER C 739 | 75.097 | 21.082 | 51.867 | 1.00 | 0.00 | O |
| ATOM | 6287 | CB  | SER C 739 | 73.882 | 21.384 | 48.908 | 1.00 | 0.00 | C |
| ATOM | 6288 | OG  | SER C 739 | 73.720 | 20.014 | 48.571 | 1.00 | 0.00 | O |
| ATOM | 6289 | N   | TRP C 740 | 75.747 | 19.436 | 50.470 | 1.00 | 0.00 | N |
| ATOM | 6290 | CA  | TRP C 740 | 75.844 | 18.471 | 51.518 | 1.00 | 0.00 | C |
| ATOM | 6291 | C   | TRP C 740 | 76.913 | 18.893 | 52.471 | 1.00 | 0.00 | C |
| ATOM | 6292 | O   | TRP C 740 | 76.737 | 18.828 | 53.686 | 1.00 | 0.00 | O |
| ATOM | 6293 | CB  | TRP C 740 | 76.185 | 17.066 | 50.991 | 1.00 | 0.00 | C |
| ATOM | 6294 | CG  | TRP C 740 | 76.256 | 16.013 | 52.066 | 1.00 | 0.00 | C |
| ATOM | 6295 | CD1 | TRP C 740 | 77.343 | 15.464 | 52.681 | 1.00 | 0.00 | C |
| ATOM | 6296 | CD2 | TRP C 740 | 75.100 | 15.410 | 52.666 | 1.00 | 0.00 | C |
| ATOM | 6297 | CE2 | TRP C 740 | 75.556 | 14.505 | 53.622 | 1.00 | 0.00 | C |
| ATOM | 6298 | CE3 | TRP C 740 | 73.769 | 15.598 | 52.434 | 1.00 | 0.00 | C |
| ATOM | 6299 | NE1 | TRP C 740 | 76.936 | 14.546 | 53.620 | 1.00 | 0.00 | N |
| ATOM | 6300 | CZ2 | TRP C 740 | 74.681 | 13.771 | 54.372 | 1.00 | 0.00 | C |
| ATOM | 6301 | CZ3 | TRP C 740 | 72.887 | 14.855 | 53.188 | 1.00 | 0.00 | C |
| ATOM | 6302 | CH2 | TRP C 740 | 73.335 | 13.959 | 54.135 | 1.00 | 0.00 | C |
| ATOM | 6303 | N   | ASN C 741 | 78.056 | 19.359 | 51.934 | 1.00 | 0.00 | N |
| ATOM | 6304 | CA  | ASN C 741 | 79.162 | 19.719 | 52.772 | 1.00 | 0.00 | C |
| ATOM | 6305 | C   | ASN C 741 | 78.753 | 20.836 | 53.675 | 1.00 | 0.00 | C |
| ATOM | 6306 | O   | ASN C 741 | 79.032 | 20.795 | 54.872 | 1.00 | 0.00 | O |
| ATOM | 6307 | CB  | ASN C 741 | 80.383 | 20.196 | 51.970 | 1.00 | 0.00 | C |
| ATOM | 6308 | CG  | ASN C 741 | 80.958 | 18.996 | 51.226 | 1.00 | 0.00 | C |
| ATOM | 6309 | ND2 | ASN C 741 | 81.411 | 19.226 | 49.966 | 1.00 | 0.00 | N |
| ATOM | 6310 | OD1 | ASN C 741 | 80.997 | 17.883 | 51.752 | 1.00 | 0.00 | O |
| ATOM | 6311 | N   | VAL C 742 | 78.066 | 21.863 | 53.141 | 1.00 | 0.00 | N |
| ATOM | 6312 | CA  | VAL C 742 | 77.714 | 22.969 | 53.982 | 1.00 | 0.00 | C |
| ATOM | 6313 | C   | VAL C 742 | 76.780 | 22.494 | 55.053 | 1.00 | 0.00 | C |
| ATOM | 6314 | O   | VAL C 742 | 76.939 | 22.854 | 56.219 | 1.00 | 0.00 | O |
| ATOM | 6315 | CB  | VAL C 742 | 77.065 | 24.111 | 53.250 | 1.00 | 0.00 | C |
| ATOM | 6316 | CG1 | VAL C 742 | 78.081 | 24.678 | 52.243 | 1.00 | 0.00 | C |
| ATOM | 6317 | CG2 | VAL C 742 | 75.752 | 23.636 | 52.611 | 1.00 | 0.00 | C |
| ATOM | 6318 | N   | VAL C 743 | 75.792 | 21.657 | 54.696 | 1.00 | 0.00 | N |
| ATOM | 6319 | CA  | VAL C 743 | 74.838 | 21.214 | 55.672 | 1.00 | 0.00 | C |
| ATOM | 6320 | C   | VAL C 743 | 75.550 | 20.431 | 56.731 | 1.00 | 0.00 | C |
| ATOM | 6321 | O   | VAL C 743 | 75.316 | 20.625 | 57.923 | 1.00 | 0.00 | O |
| ATOM | 6322 | CB  | VAL C 743 | 73.785 | 20.319 | 55.093 | 1.00 | 0.00 | C |
| ATOM | 6323 | CG1 | VAL C 743 | 72.878 | 19.836 | 56.237 | 1.00 | 0.00 | C |
| ATOM | 6324 | CG2 | VAL C 743 | 73.036 | 21.086 | 53.987 | 1.00 | 0.00 | C |
| ATOM | 6325 | N   | PHE C 744 | 76.453 | 19.528 | 56.321 | 1.00 | 0.00 | N |
| ATOM | 6326 | CA  | PHE C 744 | 77.148 | 18.669 | 57.239 | 1.00 | 0.00 | C |
| ATOM | 6327 | C   | PHE C 744 | 78.004 | 19.497 | 58.137 | 1.00 | 0.00 | C |
| ATOM | 6328 | O   | PHE C 744 | 78.043 | 19.280 | 59.346 | 1.00 | 0.00 | O |
| ATOM | 6329 | CB  | PHE C 744 | 78.075 | 17.680 | 56.511 | 1.00 | 0.00 | C |

|      |      |     |     |   |     |        |        |        |      |      |   |
|------|------|-----|-----|---|-----|--------|--------|--------|------|------|---|
| ATOM | 6330 | CG  | PHE | C | 744 | 78.683 | 16.763 | 57.517 | 1.00 | 0.00 | C |
| ATOM | 6331 | CD1 | PHE | C | 744 | 78.031 | 15.609 | 57.883 | 1.00 | 0.00 | C |
| ATOM | 6332 | CD2 | PHE | C | 744 | 79.897 | 17.051 | 58.093 | 1.00 | 0.00 | C |
| ATOM | 6333 | CE1 | PHE | C | 744 | 78.583 | 14.753 | 58.807 | 1.00 | 0.00 | C |
| ATOM | 6334 | CE2 | PHE | C | 744 | 80.455 | 16.200 | 59.019 | 1.00 | 0.00 | C |
| ATOM | 6335 | CZ  | PHE | C | 744 | 79.799 | 15.046 | 59.377 | 1.00 | 0.00 | C |
| ATOM | 6336 | N   | TYR | C | 745 | 78.712 | 20.486 | 57.563 | 1.00 | 0.00 | N |
| ATOM | 6337 | CA  | TYR | C | 745 | 79.642 | 21.238 | 58.341 | 1.00 | 0.00 | C |
| ATOM | 6338 | C   | TYR | C | 745 | 78.897 | 21.993 | 59.390 | 1.00 | 0.00 | C |
| ATOM | 6339 | O   | TYR | C | 745 | 79.351 | 22.092 | 60.528 | 1.00 | 0.00 | O |
| ATOM | 6340 | CB  | TYR | C | 745 | 80.469 | 22.245 | 57.530 | 1.00 | 0.00 | C |
| ATOM | 6341 | CG  | TYR | C | 745 | 81.630 | 22.561 | 58.401 | 1.00 | 0.00 | C |
| ATOM | 6342 | CD1 | TYR | C | 745 | 81.533 | 23.459 | 59.436 | 1.00 | 0.00 | C |
| ATOM | 6343 | CD2 | TYR | C | 745 | 82.833 | 21.930 | 58.182 | 1.00 | 0.00 | C |
| ATOM | 6344 | CE1 | TYR | C | 745 | 82.625 | 23.727 | 60.231 | 1.00 | 0.00 | C |
| ATOM | 6345 | CE2 | TYR | C | 745 | 83.926 | 22.191 | 58.973 | 1.00 | 0.00 | C |
| ATOM | 6346 | CZ  | TYR | C | 745 | 83.820 | 23.096 | 60.001 | 1.00 | 0.00 | C |
| ATOM | 6347 | OH  | TYR | C | 745 | 84.939 | 23.368 | 60.815 | 1.00 | 0.00 | O |
| ATOM | 6348 | N   | ILE | C | 746 | 77.729 | 22.560 | 59.033 | 1.00 | 0.00 | N |
| ATOM | 6349 | CA  | ILE | C | 746 | 76.994 | 23.328 | 59.993 | 1.00 | 0.00 | C |
| ATOM | 6350 | C   | ILE | C | 746 | 76.584 | 22.411 | 61.095 | 1.00 | 0.00 | C |
| ATOM | 6351 | O   | ILE | C | 746 | 76.704 | 22.747 | 62.268 | 1.00 | 0.00 | O |
| ATOM | 6352 | CB  | ILE | C | 746 | 75.778 | 24.011 | 59.422 | 1.00 | 0.00 | C |
| ATOM | 6353 | CG1 | ILE | C | 746 | 74.643 | 23.051 | 59.017 | 1.00 | 0.00 | C |
| ATOM | 6354 | CG2 | ILE | C | 746 | 76.284 | 24.833 | 58.235 | 1.00 | 0.00 | C |
| ATOM | 6355 | CD1 | ILE | C | 746 | 73.749 | 22.603 | 60.174 | 1.00 | 0.00 | C |
| ATOM | 6356 | N   | ALA | C | 747 | 76.122 | 21.197 | 60.745 | 1.00 | 0.00 | N |
| ATOM | 6357 | CA  | ALA | C | 747 | 75.649 | 20.286 | 61.743 | 1.00 | 0.00 | C |
| ATOM | 6358 | C   | ALA | C | 747 | 76.788 | 19.993 | 62.660 | 1.00 | 0.00 | C |
| ATOM | 6359 | O   | ALA | C | 747 | 76.621 | 19.926 | 63.876 | 1.00 | 0.00 | O |
| ATOM | 6360 | CB  | ALA | C | 747 | 75.173 | 18.946 | 61.152 | 1.00 | 0.00 | C |
| ATOM | 6361 | N   | PHE | C | 748 | 77.987 | 19.830 | 62.082 | 1.00 | 0.00 | N |
| ATOM | 6362 | CA  | PHE | C | 748 | 79.155 | 19.512 | 62.842 | 1.00 | 0.00 | C |
| ATOM | 6363 | C   | PHE | C | 748 | 79.412 | 20.641 | 63.790 | 1.00 | 0.00 | C |
| ATOM | 6364 | O   | PHE | C | 748 | 79.734 | 20.423 | 64.956 | 1.00 | 0.00 | O |
| ATOM | 6365 | CB  | PHE | C | 748 | 80.396 | 19.339 | 61.946 | 1.00 | 0.00 | C |
| ATOM | 6366 | CG  | PHE | C | 748 | 81.564 | 19.012 | 62.807 | 1.00 | 0.00 | C |
| ATOM | 6367 | CD1 | PHE | C | 748 | 81.786 | 17.720 | 63.228 | 1.00 | 0.00 | C |
| ATOM | 6368 | CD2 | PHE | C | 748 | 82.447 | 19.998 | 63.184 | 1.00 | 0.00 | C |
| ATOM | 6369 | CE1 | PHE | C | 748 | 82.869 | 17.420 | 64.021 | 1.00 | 0.00 | C |
| ATOM | 6370 | CE2 | PHE | C | 748 | 83.531 | 19.702 | 63.975 | 1.00 | 0.00 | C |
| ATOM | 6371 | CZ  | PHE | C | 748 | 83.744 | 18.412 | 64.394 | 1.00 | 0.00 | C |
| ATOM | 6372 | N   | LEU | C | 749 | 79.261 | 21.889 | 63.304 | 1.00 | 0.00 | N |
| ATOM | 6373 | CA  | LEU | C | 749 | 79.548 | 23.042 | 64.106 | 1.00 | 0.00 | C |

|      |      |     |     |   |     |        |        |        |      |      |   |
|------|------|-----|-----|---|-----|--------|--------|--------|------|------|---|
| ATOM | 6374 | C   | LEU | C | 749 | 78.619 | 23.091 | 65.280 | 1.00 | 0.00 | C |
| ATOM | 6375 | O   | LEU | C | 749 | 79.041 | 23.352 | 66.405 | 1.00 | 0.00 | O |
| ATOM | 6376 | CB  | LEU | C | 749 | 79.404 | 24.355 | 63.321 | 1.00 | 0.00 | C |
| ATOM | 6377 | CG  | LEU | C | 749 | 79.773 | 25.594 | 64.153 | 1.00 | 0.00 | C |
| ATOM | 6378 | CD1 | LEU | C | 749 | 81.231 | 25.509 | 64.620 | 1.00 | 0.00 | C |
| ATOM | 6379 | CD2 | LEU | C | 749 | 79.482 | 26.896 | 63.397 | 1.00 | 0.00 | C |
| ATOM | 6380 | N   | LEU | C | 750 | 77.321 | 22.828 | 65.050 | 1.00 | 0.00 | N |
| ATOM | 6381 | CA  | LEU | C | 750 | 76.342 | 22.888 | 66.097 | 1.00 | 0.00 | C |
| ATOM | 6382 | C   | LEU | C | 750 | 76.636 | 21.843 | 67.131 | 1.00 | 0.00 | C |
| ATOM | 6383 | O   | LEU | C | 750 | 76.560 | 22.116 | 68.327 | 1.00 | 0.00 | O |
| ATOM | 6384 | CB  | LEU | C | 750 | 74.919 | 22.670 | 65.556 | 1.00 | 0.00 | C |
| ATOM | 6385 | CG  | LEU | C | 750 | 74.342 | 23.910 | 64.841 | 1.00 | 0.00 | C |
| ATOM | 6386 | CD1 | LEU | C | 750 | 75.318 | 24.515 | 63.824 | 1.00 | 0.00 | C |
| ATOM | 6387 | CD2 | LEU | C | 750 | 73.004 | 23.566 | 64.177 | 1.00 | 0.00 | C |
| ATOM | 6388 | N   | LEU | C | 751 | 77.001 | 20.623 | 66.698 | 1.00 | 0.00 | N |
| ATOM | 6389 | CA  | LEU | C | 751 | 77.269 | 19.562 | 67.625 | 1.00 | 0.00 | C |
| ATOM | 6390 | C   | LEU | C | 751 | 78.453 | 19.953 | 68.451 | 1.00 | 0.00 | C |
| ATOM | 6391 | O   | LEU | C | 751 | 78.511 | 19.678 | 69.648 | 1.00 | 0.00 | O |
| ATOM | 6392 | CB  | LEU | C | 751 | 77.621 | 18.230 | 66.934 | 1.00 | 0.00 | C |
| ATOM | 6393 | CG  | LEU | C | 751 | 76.461 | 17.627 | 66.123 | 1.00 | 0.00 | C |
| ATOM | 6394 | CD1 | LEU | C | 751 | 76.871 | 16.298 | 65.467 | 1.00 | 0.00 | C |
| ATOM | 6395 | CD2 | LEU | C | 751 | 75.185 | 17.504 | 66.975 | 1.00 | 0.00 | C |
| ATOM | 6396 | N   | PHE | C | 752 | 79.427 | 20.618 | 67.811 | 1.00 | 0.00 | N |
| ATOM | 6397 | CA  | PHE | C | 752 | 80.652 | 21.030 | 68.428 | 1.00 | 0.00 | C |
| ATOM | 6398 | C   | PHE | C | 752 | 80.331 | 21.987 | 69.538 | 1.00 | 0.00 | C |
| ATOM | 6399 | O   | PHE | C | 752 | 80.872 | 21.879 | 70.634 | 1.00 | 0.00 | O |
| ATOM | 6400 | CB  | PHE | C | 752 | 81.541 | 21.752 | 67.397 | 1.00 | 0.00 | C |
| ATOM | 6401 | CG  | PHE | C | 752 | 82.890 | 22.042 | 67.956 | 1.00 | 0.00 | C |
| ATOM | 6402 | CD1 | PHE | C | 752 | 83.866 | 21.073 | 67.957 | 1.00 | 0.00 | C |
| ATOM | 6403 | CD2 | PHE | C | 752 | 83.186 | 23.288 | 68.459 | 1.00 | 0.00 | C |
| ATOM | 6404 | CE1 | PHE | C | 752 | 85.114 | 21.335 | 68.464 | 1.00 | 0.00 | C |
| ATOM | 6405 | CE2 | PHE | C | 752 | 84.436 | 23.558 | 68.967 | 1.00 | 0.00 | C |
| ATOM | 6406 | CZ  | PHE | C | 752 | 85.403 | 22.581 | 68.967 | 1.00 | 0.00 | C |
| ATOM | 6407 | N   | ALA | C | 753 | 79.435 | 22.956 | 69.269 | 1.00 | 0.00 | N |
| ATOM | 6408 | CA  | ALA | C | 753 | 79.058 | 23.941 | 70.241 | 1.00 | 0.00 | C |
| ATOM | 6409 | C   | ALA | C | 753 | 78.374 | 23.258 | 71.383 | 1.00 | 0.00 | C |
| ATOM | 6410 | O   | ALA | C | 753 | 78.597 | 23.594 | 72.543 | 1.00 | 0.00 | O |
| ATOM | 6411 | CB  | ALA | C | 753 | 78.089 | 24.997 | 69.676 | 1.00 | 0.00 | C |
| ATOM | 6412 | N   | TYR | C | 754 | 77.531 | 22.258 | 71.069 | 1.00 | 0.00 | N |
| ATOM | 6413 | CA  | TYR | C | 754 | 76.782 | 21.549 | 72.067 | 1.00 | 0.00 | C |
| ATOM | 6414 | C   | TYR | C | 754 | 77.761 | 20.912 | 72.987 | 1.00 | 0.00 | C |
| ATOM | 6415 | O   | TYR | C | 754 | 77.591 | 20.932 | 74.207 | 1.00 | 0.00 | O |
| ATOM | 6416 | CB  | TYR | C | 754 | 75.916 | 20.429 | 71.457 | 1.00 | 0.00 | C |
| ATOM | 6417 | CG  | TYR | C | 754 | 75.230 | 19.694 | 72.559 | 1.00 | 0.00 | C |



|      |      |               |        |        |        |      |      |   |
|------|------|---------------|--------|--------|--------|------|------|---|
| ATOM | 6418 | CD1 TYR C 754 | 74.124 | 20.227 | 73.178 | 1.00 | 0.00 | C |
| ATOM | 6419 | CD2 TYR C 754 | 75.685 | 18.459 | 72.964 | 1.00 | 0.00 | C |
| ATOM | 6420 | CE1 TYR C 754 | 73.488 | 19.547 | 74.189 | 1.00 | 0.00 | C |
| ATOM | 6421 | CE2 TYR C 754 | 75.053 | 17.773 | 73.976 | 1.00 | 0.00 | C |
| ATOM | 6422 | CZ TYR C 754  | 73.953 | 18.318 | 74.589 | 1.00 | 0.00 | C |
| ATOM | 6423 | OH TYR C 754  | 73.303 | 17.618 | 75.629 | 1.00 | 0.00 | O |
| ATOM | 6424 | N VAL C 755   | 78.829 | 20.331 | 72.414 | 1.00 | 0.00 | N |
| ATOM | 6425 | CA VAL C 755  | 79.834 | 19.671 | 73.186 | 1.00 | 0.00 | C |
| ATOM | 6426 | C VAL C 755   | 80.475 | 20.677 | 74.083 | 1.00 | 0.00 | C |
| ATOM | 6427 | O VAL C 755   | 80.828 | 20.366 | 75.220 | 1.00 | 0.00 | O |
| ATOM | 6428 | CB VAL C 755  | 80.915 | 19.074 | 72.339 | 1.00 | 0.00 | C |
| ATOM | 6429 | CG1 VAL C 755 | 81.970 | 18.462 | 73.274 | 1.00 | 0.00 | C |
| ATOM | 6430 | CG2 VAL C 755 | 80.278 | 18.071 | 71.364 | 1.00 | 0.00 | C |
| ATOM | 6431 | N LEU C 756   | 80.641 | 21.923 | 73.599 | 1.00 | 0.00 | N |
| ATOM | 6432 | CA LEU C 756  | 81.304 | 22.932 | 74.375 | 1.00 | 0.00 | C |
| ATOM | 6433 | C LEU C 756   | 80.575 | 23.110 | 75.667 | 1.00 | 0.00 | C |
| ATOM | 6434 | O LEU C 756   | 81.184 | 23.108 | 76.734 | 1.00 | 0.00 | O |
| ATOM | 6435 | CB LEU C 756  | 81.265 | 24.316 | 73.697 | 1.00 | 0.00 | C |
| ATOM | 6436 | CG LEU C 756  | 82.162 | 24.458 | 72.454 | 1.00 | 0.00 | C |
| ATOM | 6437 | CD1 LEU C 756 | 82.031 | 25.851 | 71.820 | 1.00 | 0.00 | C |
| ATOM | 6438 | CD2 LEU C 756 | 83.616 | 24.141 | 72.812 | 1.00 | 0.00 | C |
| ATOM | 6439 | N LEU C 757   | 79.243 | 23.265 | 75.596 | 1.00 | 0.00 | N |
| ATOM | 6440 | CA LEU C 757  | 78.461 | 23.486 | 76.776 | 1.00 | 0.00 | C |
| ATOM | 6441 | C LEU C 757   | 78.497 | 22.230 | 77.603 | 1.00 | 0.00 | C |
| ATOM | 6442 | O LEU C 757   | 78.599 | 22.269 | 78.826 | 1.00 | 0.00 | O |
| ATOM | 6443 | CB LEU C 757  | 76.991 | 23.796 | 76.423 | 1.00 | 0.00 | C |
| ATOM | 6444 | CG LEU C 757  | 76.106 | 24.340 | 77.568 | 1.00 | 0.00 | C |
| ATOM | 6445 | CD1 LEU C 757 | 74.679 | 24.603 | 77.067 | 1.00 | 0.00 | C |
| ATOM | 6446 | CD2 LEU C 757 | 76.126 | 23.458 | 78.824 | 1.00 | 0.00 | C |
| ATOM | 6447 | N MET C 758   | 78.428 | 21.086 | 76.903 | 1.00 | 0.00 | N |
| ATOM | 6448 | CA MET C 758  | 78.322 | 19.737 | 77.380 | 1.00 | 0.00 | C |
| ATOM | 6449 | C MET C 758   | 79.557 | 19.268 | 78.102 | 1.00 | 0.00 | C |
| ATOM | 6450 | O MET C 758   | 79.471 | 18.368 | 78.938 | 1.00 | 0.00 | O |
| ATOM | 6451 | CB MET C 758  | 78.074 | 18.767 | 76.214 | 1.00 | 0.00 | C |
| ATOM | 6452 | CG MET C 758  | 77.781 | 17.331 | 76.636 | 1.00 | 0.00 | C |
| ATOM | 6453 | SD MET C 758  | 77.486 | 16.193 | 75.246 | 1.00 | 0.00 | S |
| ATOM | 6454 | CE MET C 758  | 77.217 | 14.733 | 76.290 | 1.00 | 0.00 | C |
| ATOM | 6455 | N ASP C 759   | 80.728 | 19.851 | 77.788 | 1.00 | 0.00 | N |
| ATOM | 6456 | CA ASP C 759  | 82.027 | 19.387 | 78.219 | 1.00 | 0.00 | C |
| ATOM | 6457 | C ASP C 759   | 82.057 | 18.930 | 79.649 | 1.00 | 0.00 | C |
| ATOM | 6458 | O ASP C 759   | 81.434 | 19.516 | 80.535 | 1.00 | 0.00 | O |
| ATOM | 6459 | CB ASP C 759  | 83.120 | 20.461 | 78.048 | 1.00 | 0.00 | C |
| ATOM | 6460 | CG ASP C 759  | 84.492 | 19.806 | 78.133 | 1.00 | 0.00 | C |
| ATOM | 6461 | OD1 ASP C 759 | 84.558 | 18.548 | 78.093 | 1.00 | 0.00 | O |

|        |      |               |        |        |        |      |      |   |
|--------|------|---------------|--------|--------|--------|------|------|---|
| ATOM   | 6462 | OD2 ASP C 759 | 85.497 | 20.560 | 78.233 | 1.00 | 0.00 | O |
| ATOM   | 6463 | N PHE C 760   | 82.787 | 17.814 | 79.878 | 1.00 | 0.00 | N |
| ATOM   | 6464 | CA PHE C 760  | 82.955 | 17.206 | 81.166 | 1.00 | 0.00 | C |
| ATOM   | 6465 | C PHE C 760   | 84.434 | 17.039 | 81.364 | 1.00 | 0.00 | C |
| ATOM   | 6466 | O PHE C 760   | 85.194 | 17.002 | 80.399 | 1.00 | 0.00 | O |
| ATOM   | 6467 | CB PHE C 760  | 82.283 | 15.822 | 81.251 | 1.00 | 0.00 | C |
| ATOM   | 6468 | CG PHE C 760  | 82.324 | 15.345 | 82.661 | 1.00 | 0.00 | C |
| ATOM   | 6469 | CD1 PHE C 760 | 81.430 | 15.823 | 83.589 | 1.00 | 0.00 | C |
| ATOM   | 6470 | CD2 PHE C 760 | 83.247 | 14.405 | 83.057 | 1.00 | 0.00 | C |
| ATOM   | 6471 | CE1 PHE C 760 | 81.464 | 15.381 | 84.891 | 1.00 | 0.00 | C |
| ATOM   | 6472 | CE2 PHE C 760 | 83.289 | 13.957 | 84.354 | 1.00 | 0.00 | C |
| ATOM   | 6473 | CZ PHE C 760  | 82.396 | 14.446 | 85.278 | 1.00 | 0.00 | C |
| HETATM | 6474 | N HIE C 761   | 84.890 | 16.954 | 82.633 | 1.00 | 0.00 | N |
| HETATM | 6475 | CA HIE C 761  | 86.296 | 16.845 | 82.907 | 1.00 | 0.00 | C |
| HETATM | 6476 | C HIE C 761   | 86.749 | 15.451 | 82.629 | 1.00 | 0.00 | C |
| HETATM | 6477 | O HIE C 761   | 85.957 | 14.512 | 82.677 | 1.00 | 0.00 | O |
| HETATM | 6478 | CB HIE C 761  | 86.676 | 17.174 | 84.363 | 1.00 | 0.00 | C |
| HETATM | 6479 | CG HIE C 761  | 88.161 | 17.209 | 84.577 | 1.00 | 0.00 | C |
| HETATM | 6480 | CD2 HIE C 761 | 89.027 | 18.257 | 84.537 | 1.00 | 0.00 | C |
| HETATM | 6481 | ND1 HIE C 761 | 88.930 | 16.101 | 84.857 | 1.00 | 0.00 | N |
| HETATM | 6482 | CE1 HIE C 761 | 90.211 | 16.531 | 84.966 | 1.00 | 0.00 | C |
| HETATM | 6483 | NE2 HIE C 761 | 90.320 | 17.833 | 84.781 | 1.00 | 0.00 | N |
| ATOM   | 6484 | N SER C 762   | 88.041 | 15.291 | 82.275 | 1.00 | 0.00 | N |
| ATOM   | 6485 | CA SER C 762  | 88.588 | 13.983 | 82.063 | 1.00 | 0.00 | C |
| ATOM   | 6486 | C SER C 762   | 88.200 | 13.524 | 80.699 | 1.00 | 0.00 | C |
| ATOM   | 6487 | O SER C 762   | 88.101 | 14.314 | 79.764 | 1.00 | 0.00 | O |
| ATOM   | 6488 | CB SER C 762  | 88.136 | 12.911 | 83.073 | 1.00 | 0.00 | C |
| ATOM   | 6489 | OG SER C 762  | 88.604 | 13.234 | 84.372 | 1.00 | 0.00 | O |
| ATOM   | 6490 | N VAL C 763   | 87.998 | 12.200 | 80.566 | 1.00 | 0.00 | N |
| ATOM   | 6491 | CA VAL C 763  | 87.654 | 11.622 | 79.304 | 1.00 | 0.00 | C |
| ATOM   | 6492 | C VAL C 763   | 86.313 | 12.138 | 78.891 | 1.00 | 0.00 | C |
| ATOM   | 6493 | O VAL C 763   | 85.384 | 12.274 | 79.687 | 1.00 | 0.00 | O |
| ATOM   | 6494 | CB VAL C 763  | 87.579 | 10.123 | 79.332 | 1.00 | 0.00 | C |
| ATOM   | 6495 | CG1 VAL C 763 | 86.472 | 9.708  | 80.313 | 1.00 | 0.00 | C |
| ATOM   | 6496 | CG2 VAL C 763 | 87.357 | 9.616  | 77.897 | 1.00 | 0.00 | C |
| ATOM   | 6497 | N PRO C 764   | 86.258 | 12.459 | 77.627 | 1.00 | 0.00 | N |
| ATOM   | 6498 | CA PRO C 764  | 85.041 | 12.962 | 77.039 | 1.00 | 0.00 | C |
| ATOM   | 6499 | C PRO C 764   | 84.071 | 11.873 | 76.721 | 1.00 | 0.00 | C |
| ATOM   | 6500 | O PRO C 764   | 84.449 | 10.703 | 76.737 | 1.00 | 0.00 | O |
| ATOM   | 6501 | CB PRO C 764  | 85.463 | 13.738 | 75.793 | 1.00 | 0.00 | C |
| ATOM   | 6502 | CG PRO C 764  | 86.899 | 14.180 | 76.102 | 1.00 | 0.00 | C |
| ATOM   | 6503 | CD PRO C 764  | 87.433 | 13.085 | 77.036 | 1.00 | 0.00 | C |
| HETATM | 6504 | N HIE C 765   | 82.813 | 12.251 | 76.427 | 1.00 | 0.00 | N |
| HETATM | 6505 | CA HIE C 765  | 81.793 | 11.305 | 76.087 | 1.00 | 0.00 | C |

|             |     |           |        |        |        |      |      |   |
|-------------|-----|-----------|--------|--------|--------|------|------|---|
| HETATM 6506 | C   | HIE C 765 | 82.076 | 10.881 | 74.677 | 1.00 | 0.00 | C |
| HETATM 6507 | O   | HIE C 765 | 82.845 | 11.528 | 73.966 | 1.00 | 0.00 | O |
| HETATM 6508 | CB  | HIE C 765 | 80.373 | 11.897 | 76.179 | 1.00 | 0.00 | C |
| HETATM 6509 | CG  | HIE C 765 | 79.305 | 10.862 | 76.390 | 1.00 | 0.00 | C |
| HETATM 6510 | CD2 | HIE C 765 | 78.353 | 10.373 | 75.554 | 1.00 | 0.00 | C |
| HETATM 6511 | ND1 | HIE C 765 | 79.122 | 10.208 | 77.588 | 1.00 | 0.00 | N |
| HETATM 6512 | CE1 | HIE C 765 | 78.077 | 9.361  | 77.418 | 1.00 | 0.00 | C |
| HETATM 6513 | NE2 | HIE C 765 | 77.576 | 9.426  | 76.197 | 1.00 | 0.00 | N |
| ATOM 6514   | N   | PRO C 766 | 81.509 | 9.783  | 74.254 | 1.00 | 0.00 | N |
| ATOM 6515   | CA  | PRO C 766 | 81.801 | 9.277  | 72.942 | 1.00 | 0.00 | C |
| ATOM 6516   | C   | PRO C 766 | 81.434 | 10.180 | 71.808 | 1.00 | 0.00 | C |
| ATOM 6517   | O   | PRO C 766 | 82.097 | 10.084 | 70.777 | 1.00 | 0.00 | O |
| ATOM 6518   | CB  | PRO C 766 | 81.159 | 7.893  | 72.888 | 1.00 | 0.00 | C |
| ATOM 6519   | CG  | PRO C 766 | 81.208 | 7.423  | 74.354 | 1.00 | 0.00 | C |
| ATOM 6520   | CD  | PRO C 766 | 81.148 | 8.720  | 75.178 | 1.00 | 0.00 | C |
| ATOM 6521   | N   | PRO C 767 | 80.433 | 11.007 | 71.905 | 1.00 | 0.00 | N |
| ATOM 6522   | CA  | PRO C 767 | 80.149 | 11.868 | 70.791 | 1.00 | 0.00 | C |
| ATOM 6523   | C   | PRO C 767 | 81.251 | 12.848 | 70.578 | 1.00 | 0.00 | C |
| ATOM 6524   | O   | PRO C 767 | 81.480 | 13.249 | 69.437 | 1.00 | 0.00 | O |
| ATOM 6525   | CB  | PRO C 767 | 78.783 | 12.480 | 71.087 | 1.00 | 0.00 | C |
| ATOM 6526   | CG  | PRO C 767 | 78.082 | 11.388 | 71.917 | 1.00 | 0.00 | C |
| ATOM 6527   | CD  | PRO C 767 | 79.228 | 10.646 | 72.629 | 1.00 | 0.00 | C |
| ATOM 6528   | N   | GLU C 768 | 81.933 | 13.259 | 71.663 | 1.00 | 0.00 | N |
| ATOM 6529   | CA  | GLU C 768 | 83.026 | 14.175 | 71.538 | 1.00 | 0.00 | C |
| ATOM 6530   | C   | GLU C 768 | 84.109 | 13.480 | 70.788 | 1.00 | 0.00 | C |
| ATOM 6531   | O   | GLU C 768 | 84.768 | 14.069 | 69.935 | 1.00 | 0.00 | O |
| ATOM 6532   | CB  | GLU C 768 | 83.602 | 14.608 | 72.898 | 1.00 | 0.00 | C |
| ATOM 6533   | CG  | GLU C 768 | 84.781 | 15.576 | 72.782 | 1.00 | 0.00 | C |
| ATOM 6534   | CD  | GLU C 768 | 84.260 | 16.904 | 72.260 | 1.00 | 0.00 | C |
| ATOM 6535   | OE1 | GLU C 768 | 83.466 | 16.880 | 71.279 | 1.00 | 0.00 | O |
| ATOM 6536   | OE2 | GLU C 768 | 84.642 | 17.960 | 72.834 | 1.00 | 0.00 | O |
| ATOM 6537   | N   | LEU C 769 | 84.308 | 12.183 | 71.088 | 1.00 | 0.00 | N |
| ATOM 6538   | CA  | LEU C 769 | 85.330 | 11.424 | 70.433 | 1.00 | 0.00 | C |
| ATOM 6539   | C   | LEU C 769 | 84.999 | 11.377 | 68.987 | 1.00 | 0.00 | C |
| ATOM 6540   | O   | LEU C 769 | 85.877 | 11.478 | 68.131 | 1.00 | 0.00 | O |
| ATOM 6541   | CB  | LEU C 769 | 85.435 | 9.977  | 70.935 | 1.00 | 0.00 | C |
| ATOM 6542   | CG  | LEU C 769 | 85.986 | 9.902  | 72.364 | 1.00 | 0.00 | C |
| ATOM 6543   | CD1 | LEU C 769 | 86.139 | 8.453  | 72.846 | 1.00 | 0.00 | C |
| ATOM 6544   | CD2 | LEU C 769 | 87.283 | 10.719 | 72.464 | 1.00 | 0.00 | C |
| ATOM 6545   | N   | VAL C 770 | 83.701 | 11.241 | 68.675 | 1.00 | 0.00 | N |
| ATOM 6546   | CA  | VAL C 770 | 83.305 | 11.173 | 67.305 | 1.00 | 0.00 | C |
| ATOM 6547   | C   | VAL C 770 | 83.727 | 12.445 | 66.655 | 1.00 | 0.00 | C |
| ATOM 6548   | O   | VAL C 770 | 84.244 | 12.442 | 65.540 | 1.00 | 0.00 | O |
| ATOM 6549   | CB  | VAL C 770 | 81.822 | 11.047 | 67.127 | 1.00 | 0.00 | C |

|      |      |               |        |        |        |      |      |   |
|------|------|---------------|--------|--------|--------|------|------|---|
| ATOM | 6550 | CG1 VAL C 770 | 81.513 | 11.065 | 65.620 | 1.00 | 0.00 | C |
| ATOM | 6551 | CG2 VAL C 770 | 81.347 | 9.776  | 67.848 | 1.00 | 0.00 | C |
| ATOM | 6552 | N LEU C 771   | 83.549 | 13.578 | 67.356 | 1.00 | 0.00 | N |
| ATOM | 6553 | CA LEU C 771  | 83.884 | 14.852 | 66.794 | 1.00 | 0.00 | C |
| ATOM | 6554 | C LEU C 771   | 85.345 | 14.859 | 66.492 | 1.00 | 0.00 | C |
| ATOM | 6555 | O LEU C 771   | 85.773 | 15.410 | 65.479 | 1.00 | 0.00 | O |
| ATOM | 6556 | CB LEU C 771  | 83.592 | 16.027 | 67.742 | 1.00 | 0.00 | C |
| ATOM | 6557 | CG LEU C 771  | 82.094 | 16.186 | 68.053 | 1.00 | 0.00 | C |
| ATOM | 6558 | CD1 LEU C 771 | 81.830 | 17.427 | 68.925 | 1.00 | 0.00 | C |
| ATOM | 6559 | CD2 LEU C 771 | 81.251 | 16.180 | 66.766 | 1.00 | 0.00 | C |
| ATOM | 6560 | N TYR C 772   | 86.157 | 14.235 | 67.367 | 1.00 | 0.00 | N |
| ATOM | 6561 | CA TYR C 772  | 87.568 | 14.219 | 67.128 | 1.00 | 0.00 | C |
| ATOM | 6562 | C TYR C 772   | 87.792 | 13.532 | 65.823 | 1.00 | 0.00 | C |
| ATOM | 6563 | O TYR C 772   | 88.607 | 13.966 | 65.011 | 1.00 | 0.00 | O |
| ATOM | 6564 | CB TYR C 772  | 88.363 | 13.462 | 68.205 | 1.00 | 0.00 | C |
| ATOM | 6565 | CG TYR C 772  | 88.317 | 14.286 | 69.449 | 1.00 | 0.00 | C |
| ATOM | 6566 | CD1 TYR C 772 | 89.147 | 15.374 | 69.581 | 1.00 | 0.00 | C |
| ATOM | 6567 | CD2 TYR C 772 | 87.459 | 13.970 | 70.475 | 1.00 | 0.00 | C |
| ATOM | 6568 | CE1 TYR C 772 | 89.117 | 16.140 | 70.721 | 1.00 | 0.00 | C |
| ATOM | 6569 | CE2 TYR C 772 | 87.426 | 14.735 | 71.616 | 1.00 | 0.00 | C |
| ATOM | 6570 | CZ TYR C 772  | 88.255 | 15.823 | 71.739 | 1.00 | 0.00 | C |
| ATOM | 6571 | OH TYR C 772  | 88.226 | 16.610 | 72.910 | 1.00 | 0.00 | O |
| ATOM | 6572 | N SER C 773   | 87.044 | 12.444 | 65.587 | 1.00 | 0.00 | N |
| ATOM | 6573 | CA SER C 773  | 87.170 | 11.686 | 64.379 | 1.00 | 0.00 | C |
| ATOM | 6574 | C SER C 773   | 86.883 | 12.584 | 63.215 | 1.00 | 0.00 | C |
| ATOM | 6575 | O SER C 773   | 87.606 | 12.566 | 62.220 | 1.00 | 0.00 | O |
| ATOM | 6576 | CB SER C 773  | 86.155 | 10.535 | 64.341 | 1.00 | 0.00 | C |
| ATOM | 6577 | OG SER C 773  | 86.149 | 9.939  | 63.057 | 1.00 | 0.00 | O |
| ATOM | 6578 | N LEU C 774   | 85.823 | 13.410 | 63.315 | 1.00 | 0.00 | N |
| ATOM | 6579 | CA LEU C 774  | 85.473 | 14.288 | 62.235 | 1.00 | 0.00 | C |
| ATOM | 6580 | C LEU C 774   | 86.587 | 15.259 | 62.010 | 1.00 | 0.00 | C |
| ATOM | 6581 | O LEU C 774   | 86.896 | 15.607 | 60.873 | 1.00 | 0.00 | O |
| ATOM | 6582 | CB LEU C 774  | 84.182 | 15.095 | 62.472 | 1.00 | 0.00 | C |
| ATOM | 6583 | CG LEU C 774  | 82.882 | 14.279 | 62.316 | 1.00 | 0.00 | C |
| ATOM | 6584 | CD1 LEU C 774 | 82.679 | 13.834 | 60.858 | 1.00 | 0.00 | C |
| ATOM | 6585 | CD2 LEU C 774 | 82.818 | 13.102 | 63.298 | 1.00 | 0.00 | C |
| ATOM | 6586 | N VAL C 775   | 87.229 | 15.726 | 63.091 | 1.00 | 0.00 | N |
| ATOM | 6587 | CA VAL C 775  | 88.307 | 16.659 | 62.932 | 1.00 | 0.00 | C |
| ATOM | 6588 | C VAL C 775   | 89.355 | 15.978 | 62.117 | 1.00 | 0.00 | C |
| ATOM | 6589 | O VAL C 775   | 89.979 | 16.590 | 61.248 | 1.00 | 0.00 | O |
| ATOM | 6590 | CB VAL C 775  | 88.925 | 17.041 | 64.246 | 1.00 | 0.00 | C |
| ATOM | 6591 | CG1 VAL C 775 | 90.147 | 17.929 | 63.975 | 1.00 | 0.00 | C |
| ATOM | 6592 | CG2 VAL C 775 | 87.846 | 17.714 | 65.115 | 1.00 | 0.00 | C |
| ATOM | 6593 | N PHE C 776   | 89.564 | 14.677 | 62.378 | 1.00 | 0.00 | N |

|      |      |     |     |   |     |        |        |        |      |      |   |
|------|------|-----|-----|---|-----|--------|--------|--------|------|------|---|
| ATOM | 6594 | CA  | PHE | C | 776 | 90.549 | 13.908 | 61.682 | 1.00 | 0.00 | C |
| ATOM | 6595 | C   | PHE | C | 776 | 90.217 | 13.871 | 60.225 | 1.00 | 0.00 | C |
| ATOM | 6596 | O   | PHE | C | 776 | 91.097 | 14.059 | 59.386 | 1.00 | 0.00 | O |
| ATOM | 6597 | CB  | PHE | C | 776 | 90.609 | 12.448 | 62.166 | 1.00 | 0.00 | C |
| ATOM | 6598 | CG  | PHE | C | 776 | 91.465 | 11.685 | 61.213 | 1.00 | 0.00 | C |
| ATOM | 6599 | CD1 | PHE | C | 776 | 92.837 | 11.764 | 61.270 | 1.00 | 0.00 | C |
| ATOM | 6600 | CD2 | PHE | C | 776 | 90.886 | 10.878 | 60.259 | 1.00 | 0.00 | C |
| ATOM | 6601 | CE1 | PHE | C | 776 | 93.615 | 11.053 | 60.387 | 1.00 | 0.00 | C |
| ATOM | 6602 | CE2 | PHE | C | 776 | 91.659 | 10.165 | 59.371 | 1.00 | 0.00 | C |
| ATOM | 6603 | CZ  | PHE | C | 776 | 93.028 | 10.254 | 59.435 | 1.00 | 0.00 | C |
| ATOM | 6604 | N   | VAL | C | 777 | 88.939 | 13.642 | 59.874 | 1.00 | 0.00 | N |
| ATOM | 6605 | CA  | VAL | C | 777 | 88.618 | 13.536 | 58.477 | 1.00 | 0.00 | C |
| ATOM | 6606 | C   | VAL | C | 777 | 88.923 | 14.838 | 57.813 | 1.00 | 0.00 | C |
| ATOM | 6607 | O   | VAL | C | 777 | 89.447 | 14.875 | 56.701 | 1.00 | 0.00 | O |
| ATOM | 6608 | CB  | VAL | C | 777 | 87.186 | 13.175 | 58.194 | 1.00 | 0.00 | C |
| ATOM | 6609 | CG1 | VAL | C | 777 | 86.276 | 14.372 | 58.511 | 1.00 | 0.00 | C |
| ATOM | 6610 | CG2 | VAL | C | 777 | 87.091 | 12.703 | 56.734 | 1.00 | 0.00 | C |
| ATOM | 6611 | N   | LEU | C | 778 | 88.615 | 15.962 | 58.485 | 1.00 | 0.00 | N |
| ATOM | 6612 | CA  | LEU | C | 778 | 88.850 | 17.250 | 57.905 | 1.00 | 0.00 | C |
| ATOM | 6613 | C   | LEU | C | 778 | 90.322 | 17.404 | 57.709 | 1.00 | 0.00 | C |
| ATOM | 6614 | O   | LEU | C | 778 | 90.774 | 17.943 | 56.699 | 1.00 | 0.00 | O |
| ATOM | 6615 | CB  | LEU | C | 778 | 88.379 | 18.391 | 58.820 | 1.00 | 0.00 | C |
| ATOM | 6616 | CG  | LEU | C | 778 | 86.875 | 18.330 | 59.145 | 1.00 | 0.00 | C |
| ATOM | 6617 | CD1 | LEU | C | 778 | 86.440 | 19.510 | 60.024 | 1.00 | 0.00 | C |
| ATOM | 6618 | CD2 | LEU | C | 778 | 86.032 | 18.184 | 57.868 | 1.00 | 0.00 | C |
| ATOM | 6619 | N   | PHE | C | 779 | 91.114 | 16.922 | 58.682 | 1.00 | 0.00 | N |
| ATOM | 6620 | CA  | PHE | C | 779 | 92.539 | 17.058 | 58.628 | 1.00 | 0.00 | C |
| ATOM | 6621 | C   | PHE | C | 779 | 93.070 | 16.349 | 57.425 | 1.00 | 0.00 | C |
| ATOM | 6622 | O   | PHE | C | 779 | 93.865 | 16.907 | 56.670 | 1.00 | 0.00 | O |
| ATOM | 6623 | CB  | PHE | C | 779 | 93.240 | 16.455 | 59.855 | 1.00 | 0.00 | C |
| ATOM | 6624 | CG  | PHE | C | 779 | 94.700 | 16.658 | 59.654 | 1.00 | 0.00 | C |
| ATOM | 6625 | CD1 | PHE | C | 779 | 95.286 | 17.862 | 59.971 | 1.00 | 0.00 | C |
| ATOM | 6626 | CD2 | PHE | C | 779 | 95.478 | 15.642 | 59.152 | 1.00 | 0.00 | C |
| ATOM | 6627 | CE1 | PHE | C | 779 | 96.633 | 18.046 | 59.782 | 1.00 | 0.00 | C |
| ATOM | 6628 | CE2 | PHE | C | 779 | 96.826 | 15.821 | 58.962 | 1.00 | 0.00 | C |
| ATOM | 6629 | CZ  | PHE | C | 779 | 97.405 | 17.026 | 59.279 | 1.00 | 0.00 | C |
| ATOM | 6630 | N   | CYS | C | 780 | 92.638 | 15.094 | 57.200 | 1.00 | 0.00 | N |
| ATOM | 6631 | CA  | CYS | C | 780 | 93.185 | 14.357 | 56.097 | 1.00 | 0.00 | C |
| ATOM | 6632 | C   | CYS | C | 780 | 92.809 | 15.027 | 54.811 | 1.00 | 0.00 | C |
| ATOM | 6633 | O   | CYS | C | 780 | 93.612 | 15.107 | 53.886 | 1.00 | 0.00 | O |
| ATOM | 6634 | CB  | CYS | C | 780 | 92.730 | 12.884 | 56.038 | 1.00 | 0.00 | C |
| ATOM | 6635 | SG  | CYS | C | 780 | 90.962 | 12.666 | 55.686 | 1.00 | 0.00 | S |
| ATOM | 6636 | N   | ASP | C | 781 | 91.569 | 15.537 | 54.713 | 1.00 | 0.00 | N |
| ATOM | 6637 | CA  | ASP | C | 781 | 91.148 | 16.154 | 53.488 | 1.00 | 0.00 | C |

|        |      |     |           |        |        |        |      |      |     |
|--------|------|-----|-----------|--------|--------|--------|------|------|-----|
| ATOM   | 6638 | C   | ASP C 781 | 91.994 | 17.356 | 53.225 | 1.00 | 0.00 | C   |
| ATOM   | 6639 | O   | ASP C 781 | 92.488 | 17.548 | 52.112 | 1.00 | 0.00 | O   |
| ATOM   | 6640 | CB  | ASP C 781 | 89.687 | 16.636 | 53.544 | 1.00 | 0.00 | C   |
| ATOM   | 6641 | CG  | ASP C 781 | 89.290 | 17.186 | 52.178 | 1.00 | 0.00 | C   |
| ATOM   | 6642 | OD1 | ASP C 781 | 90.124 | 17.100 | 51.234 | 1.00 | 0.00 | O   |
| ATOM   | 6643 | OD2 | ASP C 781 | 88.148 | 17.704 | 52.061 | 1.00 | 0.00 | O   |
| HETATM | 6644 | N   | GU1 C 782 | 92.186 | 18.201 | 54.273 | 1.00 | 0.00 | N   |
| HETATM | 6645 | CA  | GU1 C 782 | 92.937 | 19.427 | 54.025 | 1.00 | 0.00 | C   |
| HETATM | 6646 | C   | GU1 C 782 | 94.370 | 19.120 | 53.662 | 1.00 | 0.00 | C   |
| HETATM | 6647 | O   | GU1 C 782 | 94.918 | 19.806 | 52.841 | 1.00 | 0.00 | O   |
| HETATM | 6648 | CB  | GU1 C 782 | 92.878 | 20.344 | 55.280 | 1.00 | 0.00 | C   |
| HETATM | 6649 | CG  | GU1 C 782 | 91.489 | 20.995 | 55.579 | 1.00 | 0.00 | C   |
| HETATM | 6650 | CD  | GU1 C 782 | 90.563 | 21.288 | 54.413 | 1.00 | 0.00 | C   |
| HETATM | 6651 | OE1 | GU1 C 782 | 89.519 | 20.630 | 54.243 | 1.00 | 0.00 | O   |
| HETATM | 6652 | OE2 | GU1 C 782 | 90.900 | 22.221 | 53.655 | 1.00 | 0.00 | O1- |
| ATOM   | 6653 | N   | VAL C 783 | 94.943 | 18.096 | 54.307 | 1.00 | 0.00 | N   |
| ATOM   | 6654 | CA  | VAL C 783 | 96.305 | 17.789 | 53.988 | 1.00 | 0.00 | C   |
| ATOM   | 6655 | C   | VAL C 783 | 96.382 | 17.357 | 52.559 | 1.00 | 0.00 | C   |
| ATOM   | 6656 | O   | VAL C 783 | 97.351 | 17.668 | 51.865 | 1.00 | 0.00 | O   |
| ATOM   | 6657 | CB  | VAL C 783 | 96.946 | 16.772 | 54.895 | 1.00 | 0.00 | C   |
| ATOM   | 6658 | CG1 | VAL C 783 | 97.077 | 17.420 | 56.279 | 1.00 | 0.00 | C   |
| ATOM   | 6659 | CG2 | VAL C 783 | 96.119 | 15.479 | 54.922 | 1.00 | 0.00 | C   |
| ATOM   | 6660 | N   | ARG C 784 | 95.363 | 16.629 | 52.069 | 1.00 | 0.00 | N   |
| ATOM   | 6661 | CA  | ARG C 784 | 95.392 | 16.206 | 50.700 | 1.00 | 0.00 | C   |
| ATOM   | 6662 | C   | ARG C 784 | 95.401 | 17.419 | 49.823 | 1.00 | 0.00 | C   |
| ATOM   | 6663 | O   | ARG C 784 | 96.146 | 17.483 | 48.847 | 1.00 | 0.00 | O   |
| ATOM   | 6664 | CB  | ARG C 784 | 94.181 | 15.358 | 50.284 | 1.00 | 0.00 | C   |
| ATOM   | 6665 | CG  | ARG C 784 | 94.197 | 15.017 | 48.795 | 1.00 | 0.00 | C   |
| ATOM   | 6666 | CD  | ARG C 784 | 95.387 | 14.147 | 48.386 | 1.00 | 0.00 | C   |
| ATOM   | 6667 | NE  | ARG C 784 | 95.437 | 14.124 | 46.895 | 1.00 | 0.00 | N   |
| ATOM   | 6668 | CZ  | ARG C 784 | 96.426 | 13.435 | 46.257 | 1.00 | 0.00 | C   |
| ATOM   | 6669 | NH1 | ARG C 784 | 97.332 | 12.719 | 46.983 | 1.00 | 0.00 | N   |
| ATOM   | 6670 | NH2 | ARG C 784 | 96.508 | 13.461 | 44.897 | 1.00 | 0.00 | N   |
| HETATM | 6671 | N   | GN1 C 785 | 94.576 | 18.422 | 50.167 | 1.00 | 0.00 | N   |
| HETATM | 6672 | CA  | GN1 C 785 | 94.464 | 19.632 | 49.401 | 1.00 | 0.00 | C   |
| HETATM | 6673 | C   | GN1 C 785 | 95.788 | 20.321 | 49.452 | 1.00 | 0.00 | C   |
| HETATM | 6674 | O   | GN1 C 785 | 96.247 | 20.899 | 48.469 | 1.00 | 0.00 | O   |
| HETATM | 6675 | CB  | GN1 C 785 | 93.411 | 20.588 | 49.996 | 1.00 | 0.00 | C   |
| HETATM | 6676 | CG  | GN1 C 785 | 93.269 | 21.916 | 49.255 | 1.00 | 0.00 | C   |
| HETATM | 6677 | CD  | GN1 C 785 | 91.970 | 22.560 | 49.720 | 1.00 | 0.00 | C   |
| HETATM | 6678 | NE2 | GN1 C 785 | 90.850 | 22.253 | 49.013 | 1.00 | 0.00 | N   |
| HETATM | 6679 | OE1 | GN1 C 785 | 91.950 | 23.319 | 50.689 | 1.00 | 0.00 | O   |
| ATOM   | 6680 | N   | TRP C 786 | 96.451 | 20.251 | 50.616 | 1.00 | 0.00 | N   |
| ATOM   | 6681 | CA  | TRP C 786 | 97.722 | 20.880 | 50.812 | 1.00 | 0.00 | C   |

|      |      |     |     |   |     |         |        |        |      |      |   |
|------|------|-----|-----|---|-----|---------|--------|--------|------|------|---|
| ATOM | 6682 | C   | TRP | C | 786 | 98.656  | 20.280 | 49.813 | 1.00 | 0.00 | C |
| ATOM | 6683 | O   | TRP | C | 786 | 99.439  | 20.978 | 49.172 | 1.00 | 0.00 | O |
| ATOM | 6684 | CB  | TRP | C | 786 | 98.283  | 20.565 | 52.210 | 1.00 | 0.00 | C |
| ATOM | 6685 | CG  | TRP | C | 786 | 99.585  | 21.241 | 52.578 | 1.00 | 0.00 | C |
| ATOM | 6686 | CD1 | TRP | C | 786 | 100.866 | 20.881 | 52.278 | 1.00 | 0.00 | C |
| ATOM | 6687 | CD2 | TRP | C | 786 | 99.674  | 22.399 | 53.425 | 1.00 | 0.00 | C |
| ATOM | 6688 | CE2 | TRP | C | 786 | 101.027 | 22.682 | 53.593 | 1.00 | 0.00 | C |
| ATOM | 6689 | CE3 | TRP | C | 786 | 98.708  | 23.151 | 54.026 | 1.00 | 0.00 | C |
| ATOM | 6690 | NE1 | TRP | C | 786 | 101.749 | 21.747 | 52.883 | 1.00 | 0.00 | N |
| ATOM | 6691 | CZ2 | TRP | C | 786 | 101.436 | 23.728 | 54.371 | 1.00 | 0.00 | C |
| ATOM | 6692 | CZ3 | TRP | C | 786 | 99.121  | 24.218 | 54.793 | 1.00 | 0.00 | C |
| ATOM | 6693 | CH2 | TRP | C | 786 | 100.460 | 24.499 | 54.962 | 1.00 | 0.00 | C |
| ATOM | 6694 | N   | TYR | C | 787 | 98.583  | 18.947 | 49.655 | 1.00 | 0.00 | N |
| ATOM | 6695 | CA  | TYR | C | 787 | 99.453  | 18.239 | 48.766 | 1.00 | 0.00 | C |
| ATOM | 6696 | C   | TYR | C | 787 | 99.223  | 18.656 | 47.349 | 1.00 | 0.00 | C |
| ATOM | 6697 | O   | TYR | C | 787 | 100.178 | 18.833 | 46.594 | 1.00 | 0.00 | O |
| ATOM | 6698 | CB  | TYR | C | 787 | 99.265  | 16.713 | 48.824 | 1.00 | 0.00 | C |
| ATOM | 6699 | CG  | TYR | C | 787 | 100.126 | 16.131 | 47.754 | 1.00 | 0.00 | C |
| ATOM | 6700 | CD1 | TYR | C | 787 | 101.486 | 16.014 | 47.932 | 1.00 | 0.00 | C |
| ATOM | 6701 | CD2 | TYR | C | 787 | 99.570  | 15.696 | 46.573 | 1.00 | 0.00 | C |
| ATOM | 6702 | CE1 | TYR | C | 787 | 102.277 | 15.477 | 46.940 | 1.00 | 0.00 | C |
| ATOM | 6703 | CE2 | TYR | C | 787 | 100.356 | 15.158 | 45.579 | 1.00 | 0.00 | C |
| ATOM | 6704 | CZ  | TYR | C | 787 | 101.713 | 15.048 | 45.764 | 1.00 | 0.00 | C |
| ATOM | 6705 | OH  | TYR | C | 787 | 102.522 | 14.497 | 44.748 | 1.00 | 0.00 | O |
| ATOM | 6706 | N   | VAL | C | 788 | 97.954  | 18.836 | 46.940 | 1.00 | 0.00 | N |
| ATOM | 6707 | CA  | VAL | C | 788 | 97.695  | 19.071 | 45.550 | 1.00 | 0.00 | C |
| ATOM | 6708 | C   | VAL | C | 788 | 98.396  | 20.309 | 45.072 | 1.00 | 0.00 | C |
| ATOM | 6709 | O   | VAL | C | 788 | 99.047  | 20.274 | 44.031 | 1.00 | 0.00 | O |
| ATOM | 6710 | CB  | VAL | C | 788 | 96.232  | 19.198 | 45.210 | 1.00 | 0.00 | C |
| ATOM | 6711 | CG1 | VAL | C | 788 | 95.525  | 17.901 | 45.638 | 1.00 | 0.00 | C |
| ATOM | 6712 | CG2 | VAL | C | 788 | 95.651  | 20.479 | 45.830 | 1.00 | 0.00 | C |
| ATOM | 6713 | N   | ASN | C | 789 | 98.310  | 21.440 | 45.804 | 1.00 | 0.00 | N |
| ATOM | 6714 | CA  | ASN | C | 789 | 98.953  | 22.617 | 45.282 | 1.00 | 0.00 | C |
| ATOM | 6715 | C   | ASN | C | 789 | 100.027 | 23.037 | 46.231 | 1.00 | 0.00 | C |
| ATOM | 6716 | O   | ASN | C | 789 | 99.753  | 23.297 | 47.401 | 1.00 | 0.00 | O |
| ATOM | 6717 | CB  | ASN | C | 789 | 97.998  | 23.812 | 45.117 | 1.00 | 0.00 | C |
| ATOM | 6718 | CG  | ASN | C | 789 | 97.020  | 23.481 | 43.999 | 1.00 | 0.00 | C |
| ATOM | 6719 | ND2 | ASN | C | 789 | 95.704  | 23.706 | 44.257 | 1.00 | 0.00 | N |
| ATOM | 6720 | OD1 | ASN | C | 789 | 97.415  | 23.026 | 42.928 | 1.00 | 0.00 | O |
| ATOM | 6721 | N   | GLY | C | 790 | 101.294 | 23.063 | 45.767 | 1.00 | 0.00 | N |
| ATOM | 6722 | CA  | GLY | C | 790 | 102.325 | 23.486 | 46.668 | 1.00 | 0.00 | C |
| ATOM | 6723 | C   | GLY | C | 790 | 102.234 | 24.956 | 46.958 | 1.00 | 0.00 | C |
| ATOM | 6724 | O   | GLY | C | 790 | 102.073 | 25.350 | 48.111 | 1.00 | 0.00 | O |
| ATOM | 6725 | N   | VAL | C | 791 | 102.352 | 25.804 | 45.911 | 1.00 | 0.00 | N |

|      |      |     |     |   |     |         |        |        |      |      |   |
|------|------|-----|-----|---|-----|---------|--------|--------|------|------|---|
| ATOM | 6726 | CA  | VAL | C | 791 | 102.335 | 27.239 | 46.050 | 1.00 | 0.00 | C |
| ATOM | 6727 | C   | VAL | C | 791 | 100.953 | 27.783 | 46.207 | 1.00 | 0.00 | C |
| ATOM | 6728 | O   | VAL | C | 791 | 100.691 | 28.625 | 47.066 | 1.00 | 0.00 | O |
| ATOM | 6729 | CB  | VAL | C | 791 | 102.936 | 27.944 | 44.870 | 1.00 | 0.00 | C |
| ATOM | 6730 | CG1 | VAL | C | 791 | 102.755 | 29.461 | 45.065 | 1.00 | 0.00 | C |
| ATOM | 6731 | CG2 | VAL | C | 791 | 104.403 | 27.501 | 44.731 | 1.00 | 0.00 | C |
| ATOM | 6732 | N   | ASN | C | 792 | 100.028 | 27.282 | 45.370 | 1.00 | 0.00 | N |
| ATOM | 6733 | CA  | ASN | C | 792 | 98.710  | 27.828 | 45.270 | 1.00 | 0.00 | C |
| ATOM | 6734 | C   | ASN | C | 792 | 98.011  | 27.687 | 46.580 | 1.00 | 0.00 | C |
| ATOM | 6735 | O   | ASN | C | 792 | 97.249  | 28.559 | 46.986 | 1.00 | 0.00 | O |
| ATOM | 6736 | CB  | ASN | C | 792 | 97.852  | 27.135 | 44.197 | 1.00 | 0.00 | C |
| ATOM | 6737 | CG  | ASN | C | 792 | 96.658  | 28.032 | 43.905 | 1.00 | 0.00 | C |
| ATOM | 6738 | ND2 | ASN | C | 792 | 96.445  | 28.344 | 42.598 | 1.00 | 0.00 | N |
| ATOM | 6739 | OD1 | ASN | C | 792 | 95.942  | 28.456 | 44.810 | 1.00 | 0.00 | O |
| ATOM | 6740 | N   | TYR | C | 793 | 98.246  | 26.578 | 47.283 | 1.00 | 0.00 | N |
| ATOM | 6741 | CA  | TYR | C | 793 | 97.568  | 26.379 | 48.528 | 1.00 | 0.00 | C |
| ATOM | 6742 | C   | TYR | C | 793 | 97.990  | 27.477 | 49.459 | 1.00 | 0.00 | C |
| ATOM | 6743 | O   | TYR | C | 793 | 97.164  | 28.105 | 50.116 | 1.00 | 0.00 | O |
| ATOM | 6744 | CB  | TYR | C | 793 | 97.958  | 25.040 | 49.174 | 1.00 | 0.00 | C |
| ATOM | 6745 | CG  | TYR | C | 793 | 97.094  | 24.799 | 50.364 | 1.00 | 0.00 | C |
| ATOM | 6746 | CD1 | TYR | C | 793 | 95.849  | 24.236 | 50.212 | 1.00 | 0.00 | C |
| ATOM | 6747 | CD2 | TYR | C | 793 | 97.524  | 25.128 | 51.629 | 1.00 | 0.00 | C |
| ATOM | 6748 | CE1 | TYR | C | 793 | 95.041  | 24.001 | 51.300 | 1.00 | 0.00 | C |
| ATOM | 6749 | CE2 | TYR | C | 793 | 96.721  | 24.895 | 52.722 | 1.00 | 0.00 | C |
| ATOM | 6750 | CZ  | TYR | C | 793 | 95.478  | 24.330 | 52.559 | 1.00 | 0.00 | C |
| ATOM | 6751 | OH  | TYR | C | 793 | 94.653  | 24.085 | 53.676 | 1.00 | 0.00 | O |
| ATOM | 6752 | N   | PHE | C | 794 | 99.299  | 27.763 | 49.511 | 1.00 | 0.00 | N |
| ATOM | 6753 | CA  | PHE | C | 794 | 99.821  | 28.765 | 50.395 | 1.00 | 0.00 | C |
| ATOM | 6754 | C   | PHE | C | 794 | 99.344  | 30.120 | 49.997 | 1.00 | 0.00 | C |
| ATOM | 6755 | O   | PHE | C | 794 | 99.162  | 30.982 | 50.854 | 1.00 | 0.00 | O |
| ATOM | 6756 | CB  | PHE | C | 794 | 101.357 | 28.849 | 50.425 | 1.00 | 0.00 | C |
| ATOM | 6757 | CG  | PHE | C | 794 | 101.881 | 27.661 | 51.146 | 1.00 | 0.00 | C |
| ATOM | 6758 | CD1 | PHE | C | 794 | 101.743 | 27.556 | 52.510 | 1.00 | 0.00 | C |
| ATOM | 6759 | CD2 | PHE | C | 794 | 102.532 | 26.666 | 50.462 | 1.00 | 0.00 | C |
| ATOM | 6760 | CE1 | PHE | C | 794 | 102.235 | 26.458 | 53.176 | 1.00 | 0.00 | C |
| ATOM | 6761 | CE2 | PHE | C | 794 | 103.030 | 25.567 | 51.119 | 1.00 | 0.00 | C |
| ATOM | 6762 | CZ  | PHE | C | 794 | 102.877 | 25.462 | 52.481 | 1.00 | 0.00 | C |
| ATOM | 6763 | N   | THR | C | 795 | 99.147  | 30.364 | 48.690 | 1.00 | 0.00 | N |
| ATOM | 6764 | CA  | THR | C | 795 | 98.842  | 31.699 | 48.273 | 1.00 | 0.00 | C |
| ATOM | 6765 | C   | THR | C | 795 | 97.607  | 32.209 | 48.960 | 1.00 | 0.00 | C |
| ATOM | 6766 | O   | THR | C | 795 | 97.617  | 33.320 | 49.486 | 1.00 | 0.00 | O |
| ATOM | 6767 | CB  | THR | C | 795 | 98.671  | 31.842 | 46.785 | 1.00 | 0.00 | C |
| ATOM | 6768 | CG2 | THR | C | 795 | 97.361  | 31.201 | 46.316 | 1.00 | 0.00 | C |
| ATOM | 6769 | OG1 | THR | C | 795 | 98.649  | 33.213 | 46.451 | 1.00 | 0.00 | O |



|        |      |     |           |        |        |        |      |      |   |
|--------|------|-----|-----------|--------|--------|--------|------|------|---|
| ATOM   | 6770 | N   | ASP C 796 | 96.512 | 31.424 | 48.997 | 1.00 | 0.00 | N |
| ATOM   | 6771 | CA  | ASP C 796 | 95.322 | 31.893 | 49.652 | 1.00 | 0.00 | C |
| ATOM   | 6772 | C   | ASP C 796 | 95.593 | 31.866 | 51.122 | 1.00 | 0.00 | C |
| ATOM   | 6773 | O   | ASP C 796 | 96.254 | 30.961 | 51.632 | 1.00 | 0.00 | O |
| ATOM   | 6774 | CB  | ASP C 796 | 94.100 | 30.995 | 49.356 | 1.00 | 0.00 | C |
| ATOM   | 6775 | CG  | ASP C 796 | 92.805 | 31.691 | 49.766 | 1.00 | 0.00 | C |
| ATOM   | 6776 | OD1 | ASP C 796 | 92.791 | 32.385 | 50.815 | 1.00 | 0.00 | O |
| ATOM   | 6777 | OD2 | ASP C 796 | 91.801 | 31.533 | 49.019 | 1.00 | 0.00 | O |
| ATOM   | 6778 | N   | LEU C 797 | 95.138 | 32.906 | 51.839 | 1.00 | 0.00 | N |
| ATOM   | 6779 | CA  | LEU C 797 | 95.299 | 32.991 | 53.261 | 1.00 | 0.00 | C |
| ATOM   | 6780 | C   | LEU C 797 | 94.392 | 32.021 | 53.954 | 1.00 | 0.00 | C |
| ATOM   | 6781 | O   | LEU C 797 | 94.775 | 31.380 | 54.929 | 1.00 | 0.00 | O |
| ATOM   | 6782 | CB  | LEU C 797 | 94.952 | 34.395 | 53.784 | 1.00 | 0.00 | C |
| ATOM   | 6783 | CG  | LEU C 797 | 95.869 | 35.495 | 53.217 | 1.00 | 0.00 | C |
| ATOM   | 6784 | CD1 | LEU C 797 | 95.494 | 36.879 | 53.761 | 1.00 | 0.00 | C |
| ATOM   | 6785 | CD2 | LEU C 797 | 97.350 | 35.151 | 53.440 | 1.00 | 0.00 | C |
| ATOM   | 6786 | N   | TRP C 798 | 93.152 | 31.889 | 53.462 | 1.00 | 0.00 | N |
| ATOM   | 6787 | CA  | TRP C 798 | 92.163 | 31.111 | 54.153 | 1.00 | 0.00 | C |
| ATOM   | 6788 | C   | TRP C 798 | 92.535 | 29.671 | 54.214 | 1.00 | 0.00 | C |
| ATOM   | 6789 | O   | TRP C 798 | 92.405 | 29.044 | 55.265 | 1.00 | 0.00 | O |
| ATOM   | 6790 | CB  | TRP C 798 | 90.769 | 31.257 | 53.522 | 1.00 | 0.00 | C |
| ATOM   | 6791 | CG  | TRP C 798 | 90.243 | 32.667 | 53.665 | 1.00 | 0.00 | C |
| ATOM   | 6792 | CD1 | TRP C 798 | 90.221 | 33.684 | 52.756 | 1.00 | 0.00 | C |
| ATOM   | 6793 | CD2 | TRP C 798 | 89.692 | 33.194 | 54.880 | 1.00 | 0.00 | C |
| ATOM   | 6794 | CE2 | TRP C 798 | 89.361 | 34.527 | 54.640 | 1.00 | 0.00 | C |
| ATOM   | 6795 | CE3 | TRP C 798 | 89.484 | 32.615 | 56.100 | 1.00 | 0.00 | C |
| ATOM   | 6796 | NE1 | TRP C 798 | 89.689 | 34.815 | 53.332 | 1.00 | 0.00 | N |
| ATOM   | 6797 | CZ2 | TRP C 798 | 88.815 | 35.307 | 55.622 | 1.00 | 0.00 | C |
| ATOM   | 6798 | CZ3 | TRP C 798 | 88.928 | 33.402 | 57.086 | 1.00 | 0.00 | C |
| ATOM   | 6799 | CH2 | TRP C 798 | 88.601 | 34.722 | 56.850 | 1.00 | 0.00 | C |
| HETATM | 6800 | N   | ANI C 799 | 93.023 | 29.097 | 53.065 | 1.00 | 0.00 | N |
| HETATM | 6801 | CA  | ANI C 799 | 93.260 | 27.665 | 53.229 | 1.00 | 0.00 | C |
| HETATM | 6802 | C   | ANI C 799 | 94.421 | 27.412 | 54.161 | 1.00 | 0.00 | C |
| HETATM | 6803 | O   | ANI C 799 | 94.392 | 26.382 | 54.823 | 1.00 | 0.00 | O |
| HETATM | 6804 | CB  | ANI C 799 | 93.518 | 27.019 | 51.838 | 1.00 | 0.00 | C |
| HETATM | 6805 | CG  | ANI C 799 | 92.298 | 26.799 | 50.936 | 1.00 | 0.00 | C |
| HETATM | 6806 | ND2 | ANI C 799 | 92.000 | 27.706 | 50.047 | 1.00 | 0.00 | N |
| HETATM | 6807 | OD1 | ANI C 799 | 91.609 | 25.794 | 51.009 | 1.00 | 0.00 | O |
| ATOM   | 6808 | N   | VAL C 800 | 95.387 | 28.331 | 54.321 | 1.00 | 0.00 | N |
| ATOM   | 6809 | CA  | VAL C 800 | 96.375 | 28.095 | 55.337 | 1.00 | 0.00 | C |
| ATOM   | 6810 | C   | VAL C 800 | 95.739 | 28.275 | 56.685 | 1.00 | 0.00 | C |
| ATOM   | 6811 | O   | VAL C 800 | 96.091 | 27.594 | 57.646 | 1.00 | 0.00 | O |
| ATOM   | 6812 | CB  | VAL C 800 | 97.611 | 28.954 | 55.246 | 1.00 | 0.00 | C |
| ATOM   | 6813 | CG1 | VAL C 800 | 98.282 | 28.692 | 53.887 | 1.00 | 0.00 | C |

|        |      |               |        |        |        |      |      |     |
|--------|------|---------------|--------|--------|--------|------|------|-----|
| ATOM   | 6814 | CG2 VAL C 800 | 97.263 | 30.424 | 55.516 | 1.00 | 0.00 | C   |
| ATOM   | 6815 | N MET C 801   | 94.772 | 29.207 | 56.796 | 1.00 | 0.00 | N   |
| ATOM   | 6816 | CA MET C 801  | 94.142 | 29.493 | 58.055 | 1.00 | 0.00 | C   |
| ATOM   | 6817 | C MET C 801   | 93.444 | 28.273 | 58.565 | 1.00 | 0.00 | C   |
| ATOM   | 6818 | O MET C 801   | 93.483 | 27.987 | 59.760 | 1.00 | 0.00 | O   |
| ATOM   | 6819 | CB MET C 801  | 93.086 | 30.610 | 57.970 | 1.00 | 0.00 | C   |
| ATOM   | 6820 | CG MET C 801  | 92.275 | 30.766 | 59.259 | 1.00 | 0.00 | C   |
| ATOM   | 6821 | SD MET C 801  | 93.203 | 31.395 | 60.688 | 1.00 | 0.00 | S   |
| ATOM   | 6822 | CE MET C 801  | 93.186 | 33.120 | 60.128 | 1.00 | 0.00 | C   |
| HETATM | 6823 | N AP1 C 802   | 92.782 | 27.520 | 57.673 | 1.00 | 0.00 | N   |
| HETATM | 6824 | CA AP1 C 802  | 92.047 | 26.365 | 58.098 | 1.00 | 0.00 | C   |
| HETATM | 6825 | C AP1 C 802   | 92.991 | 25.369 | 58.702 | 1.00 | 0.00 | C   |
| HETATM | 6826 | O AP1 C 802   | 92.684 | 24.753 | 59.722 | 1.00 | 0.00 | O   |
| HETATM | 6827 | CB AP1 C 802  | 91.319 | 25.672 | 56.936 | 1.00 | 0.00 | C   |
| HETATM | 6828 | CG AP1 C 802  | 91.080 | 26.686 | 55.826 | 1.00 | 0.00 | C   |
| HETATM | 6829 | OD1 AP1 C 802 | 90.734 | 27.856 | 56.142 | 1.00 | 0.00 | O1- |
| HETATM | 6830 | OD2 AP1 C 802 | 91.236 | 26.301 | 54.638 | 1.00 | 0.00 | O   |
| ATOM   | 6831 | N THR C 803   | 94.173 | 25.180 | 58.087 | 1.00 | 0.00 | N   |
| ATOM   | 6832 | CA THR C 803  | 95.108 | 24.220 | 58.600 | 1.00 | 0.00 | C   |
| ATOM   | 6833 | C THR C 803   | 95.572 | 24.668 | 59.948 | 1.00 | 0.00 | C   |
| ATOM   | 6834 | O THR C 803   | 95.714 | 23.865 | 60.865 | 1.00 | 0.00 | O   |
| ATOM   | 6835 | CB THR C 803  | 96.328 | 24.034 | 57.738 | 1.00 | 0.00 | C   |
| ATOM   | 6836 | CG2 THR C 803 | 95.883 | 23.652 | 56.319 | 1.00 | 0.00 | C   |
| ATOM   | 6837 | OG1 THR C 803 | 97.100 | 25.226 | 57.705 | 1.00 | 0.00 | O   |
| ATOM   | 6838 | N LEU C 804   | 95.815 | 25.982 | 60.099 | 1.00 | 0.00 | N   |
| ATOM   | 6839 | CA LEU C 804  | 96.322 | 26.493 | 61.341 | 1.00 | 0.00 | C   |
| ATOM   | 6840 | C LEU C 804   | 95.297 | 26.219 | 62.396 | 1.00 | 0.00 | C   |
| ATOM   | 6841 | O LEU C 804   | 95.634 | 25.778 | 63.493 | 1.00 | 0.00 | O   |
| ATOM   | 6842 | CB LEU C 804  | 96.573 | 28.016 | 61.273 | 1.00 | 0.00 | C   |
| ATOM   | 6843 | CG LEU C 804  | 97.303 | 28.673 | 62.470 | 1.00 | 0.00 | C   |
| ATOM   | 6844 | CD1 LEU C 804 | 97.466 | 30.184 | 62.229 | 1.00 | 0.00 | C   |
| ATOM   | 6845 | CD2 LEU C 804 | 96.643 | 28.394 | 63.831 | 1.00 | 0.00 | C   |
| ATOM   | 6846 | N GLY C 805   | 94.011 | 26.464 | 62.087 | 1.00 | 0.00 | N   |
| ATOM   | 6847 | CA GLY C 805  | 92.980 | 26.287 | 63.066 | 1.00 | 0.00 | C   |
| ATOM   | 6848 | C GLY C 805   | 92.896 | 24.847 | 63.464 | 1.00 | 0.00 | C   |
| ATOM   | 6849 | O GLY C 805   | 92.735 | 24.528 | 64.642 | 1.00 | 0.00 | O   |
| ATOM   | 6850 | N LEU C 806   | 92.989 | 23.934 | 62.481 | 1.00 | 0.00 | N   |
| ATOM   | 6851 | CA LEU C 806  | 92.865 | 22.527 | 62.742 | 1.00 | 0.00 | C   |
| ATOM   | 6852 | C LEU C 806   | 94.007 | 22.102 | 63.603 | 1.00 | 0.00 | C   |
| ATOM   | 6853 | O LEU C 806   | 93.840 | 21.305 | 64.523 | 1.00 | 0.00 | O   |
| ATOM   | 6854 | CB LEU C 806  | 92.912 | 21.690 | 61.446 | 1.00 | 0.00 | C   |
| ATOM   | 6855 | CG LEU C 806  | 92.590 | 20.188 | 61.603 | 1.00 | 0.00 | C   |
| ATOM   | 6856 | CD1 LEU C 806 | 93.641 | 19.430 | 62.430 | 1.00 | 0.00 | C   |
| ATOM   | 6857 | CD2 LEU C 806 | 91.156 | 19.989 | 62.120 | 1.00 | 0.00 | C   |

|      |      |     |     |   |     |         |        |        |      |      |   |
|------|------|-----|-----|---|-----|---------|--------|--------|------|------|---|
| ATOM | 6858 | N   | PHE | C | 807 | 95.207  | 22.635 | 63.317 | 1.00 | 0.00 | N |
| ATOM | 6859 | CA  | PHE | C | 807 | 96.388  | 22.261 | 64.041 | 1.00 | 0.00 | C |
| ATOM | 6860 | C   | PHE | C | 807 | 96.236  | 22.681 | 65.471 | 1.00 | 0.00 | C |
| ATOM | 6861 | O   | PHE | C | 807 | 96.551  | 21.921 | 66.385 | 1.00 | 0.00 | O |
| ATOM | 6862 | CB  | PHE | C | 807 | 97.654  | 22.937 | 63.494 | 1.00 | 0.00 | C |
| ATOM | 6863 | CG  | PHE | C | 807 | 98.803  | 22.470 | 64.320 | 1.00 | 0.00 | C |
| ATOM | 6864 | CD1 | PHE | C | 807 | 99.376  | 21.242 | 64.081 | 1.00 | 0.00 | C |
| ATOM | 6865 | CD2 | PHE | C | 807 | 99.307  | 23.259 | 65.327 | 1.00 | 0.00 | C |
| ATOM | 6866 | CE1 | PHE | C | 807 | 100.436 | 20.808 | 64.841 | 1.00 | 0.00 | C |
| ATOM | 6867 | CE2 | PHE | C | 807 | 100.367 | 22.830 | 66.088 | 1.00 | 0.00 | C |
| ATOM | 6868 | CZ  | PHE | C | 807 | 100.931 | 21.602 | 65.847 | 1.00 | 0.00 | C |
| ATOM | 6869 | N   | TYR | C | 808 | 95.734  | 23.908 | 65.692 | 1.00 | 0.00 | N |
| ATOM | 6870 | CA  | TYR | C | 808 | 95.601  | 24.445 | 67.015 | 1.00 | 0.00 | C |
| ATOM | 6871 | C   | TYR | C | 808 | 94.629  | 23.592 | 67.769 | 1.00 | 0.00 | C |
| ATOM | 6872 | O   | TYR | C | 808 | 94.813  | 23.319 | 68.953 | 1.00 | 0.00 | O |
| ATOM | 6873 | CB  | TYR | C | 808 | 95.102  | 25.901 | 67.008 | 1.00 | 0.00 | C |
| ATOM | 6874 | CG  | TYR | C | 808 | 95.139  | 26.419 | 68.408 | 1.00 | 0.00 | C |
| ATOM | 6875 | CD1 | TYR | C | 808 | 96.344  | 26.648 | 69.031 | 1.00 | 0.00 | C |
| ATOM | 6876 | CD2 | TYR | C | 808 | 93.976  | 26.707 | 69.082 | 1.00 | 0.00 | C |
| ATOM | 6877 | CE1 | TYR | C | 808 | 96.392  | 27.130 | 70.317 | 1.00 | 0.00 | C |
| ATOM | 6878 | CE2 | TYR | C | 808 | 94.016  | 27.190 | 70.369 | 1.00 | 0.00 | C |
| ATOM | 6879 | CZ  | TYR | C | 808 | 95.226  | 27.401 | 70.989 | 1.00 | 0.00 | C |
| ATOM | 6880 | OH  | TYR | C | 808 | 95.265  | 27.896 | 72.309 | 1.00 | 0.00 | O |
| ATOM | 6881 | N   | PHE | C | 809 | 93.559  | 23.150 | 67.087 | 1.00 | 0.00 | N |
| ATOM | 6882 | CA  | PHE | C | 809 | 92.548  | 22.327 | 67.687 | 1.00 | 0.00 | C |
| ATOM | 6883 | C   | PHE | C | 809 | 93.185  | 21.039 | 68.102 | 1.00 | 0.00 | C |
| ATOM | 6884 | O   | PHE | C | 809 | 92.903  | 20.509 | 69.178 | 1.00 | 0.00 | O |
| ATOM | 6885 | CB  | PHE | C | 809 | 91.420  | 22.005 | 66.693 | 1.00 | 0.00 | C |
| ATOM | 6886 | CG  | PHE | C | 809 | 90.381  | 21.200 | 67.389 | 1.00 | 0.00 | C |
| ATOM | 6887 | CD1 | PHE | C | 809 | 89.431  | 21.820 | 68.161 | 1.00 | 0.00 | C |
| ATOM | 6888 | CD2 | PHE | C | 809 | 90.347  | 19.832 | 67.259 | 1.00 | 0.00 | C |
| ATOM | 6889 | CE1 | PHE | C | 809 | 88.464  | 21.085 | 68.801 | 1.00 | 0.00 | C |
| ATOM | 6890 | CE2 | PHE | C | 809 | 89.380  | 19.091 | 67.897 | 1.00 | 0.00 | C |
| ATOM | 6891 | CZ  | PHE | C | 809 | 88.436  | 19.717 | 68.674 | 1.00 | 0.00 | C |
| ATOM | 6892 | N   | ILE | C | 810 | 94.081  | 20.504 | 67.253 | 1.00 | 0.00 | N |
| ATOM | 6893 | CA  | ILE | C | 810 | 94.740  | 19.261 | 67.532 | 1.00 | 0.00 | C |
| ATOM | 6894 | C   | ILE | C | 810 | 95.510  | 19.452 | 68.795 | 1.00 | 0.00 | C |
| ATOM | 6895 | O   | ILE | C | 810 | 95.502  | 18.595 | 69.677 | 1.00 | 0.00 | O |
| ATOM | 6896 | CB  | ILE | C | 810 | 95.758  | 18.904 | 66.483 | 1.00 | 0.00 | C |
| ATOM | 6897 | CG1 | ILE | C | 810 | 95.125  | 18.791 | 65.087 | 1.00 | 0.00 | C |
| ATOM | 6898 | CG2 | ILE | C | 810 | 96.467  | 17.623 | 66.952 | 1.00 | 0.00 | C |
| ATOM | 6899 | CD1 | ILE | C | 810 | 94.115  | 17.657 | 64.939 | 1.00 | 0.00 | C |
| ATOM | 6900 | N   | ALA | C | 811 | 96.199  | 20.601 | 68.910 | 1.00 | 0.00 | N |
| ATOM | 6901 | CA  | ALA | C | 811 | 97.009  | 20.870 | 70.061 | 1.00 | 0.00 | C |

|      |      |     |           |         |        |        |      |      |   |
|------|------|-----|-----------|---------|--------|--------|------|------|---|
| ATOM | 6902 | C   | ALA C 811 | 96.121  | 20.890 | 71.260 | 1.00 | 0.00 | C |
| ATOM | 6903 | O   | ALA C 811 | 96.459  | 20.340 | 72.308 | 1.00 | 0.00 | O |
| ATOM | 6904 | CB  | ALA C 811 | 97.710  | 22.236 | 69.984 | 1.00 | 0.00 | C |
| ATOM | 6905 | N   | GLY C 812 | 94.933  | 21.503 | 71.139 | 1.00 | 0.00 | N |
| ATOM | 6906 | CA  | GLY C 812 | 94.061  | 21.599 | 72.270 | 1.00 | 0.00 | C |
| ATOM | 6907 | C   | GLY C 812 | 93.696  | 20.220 | 72.707 | 1.00 | 0.00 | C |
| ATOM | 6908 | O   | GLY C 812 | 93.587  | 19.952 | 73.903 | 1.00 | 0.00 | O |
| ATOM | 6909 | N   | ILE C 813 | 93.477  | 19.310 | 71.742 | 1.00 | 0.00 | N |
| ATOM | 6910 | CA  | ILE C 813 | 93.080  | 17.972 | 72.065 | 1.00 | 0.00 | C |
| ATOM | 6911 | C   | ILE C 813 | 94.173  | 17.302 | 72.835 | 1.00 | 0.00 | C |
| ATOM | 6912 | O   | ILE C 813 | 93.915  | 16.642 | 73.840 | 1.00 | 0.00 | O |
| ATOM | 6913 | CB  | ILE C 813 | 92.790  | 17.141 | 70.852 | 1.00 | 0.00 | C |
| ATOM | 6914 | CG1 | ILE C 813 | 91.629  | 17.756 | 70.051 | 1.00 | 0.00 | C |
| ATOM | 6915 | CG2 | ILE C 813 | 92.519  | 15.698 | 71.313 | 1.00 | 0.00 | C |
| ATOM | 6916 | CD1 | ILE C 813 | 91.452  | 17.142 | 68.664 | 1.00 | 0.00 | C |
| ATOM | 6917 | N   | VAL C 814 | 95.433  | 17.456 | 72.386 | 1.00 | 0.00 | N |
| ATOM | 6918 | CA  | VAL C 814 | 96.525  | 16.790 | 73.040 | 1.00 | 0.00 | C |
| ATOM | 6919 | C   | VAL C 814 | 96.683  | 17.326 | 74.433 | 1.00 | 0.00 | C |
| ATOM | 6920 | O   | VAL C 814 | 96.929  | 16.575 | 75.374 | 1.00 | 0.00 | O |
| ATOM | 6921 | CB  | VAL C 814 | 97.831  | 16.932 | 72.312 | 1.00 | 0.00 | C |
| ATOM | 6922 | CG1 | VAL C 814 | 98.355  | 18.369 | 72.447 | 1.00 | 0.00 | C |
| ATOM | 6923 | CG2 | VAL C 814 | 98.796  | 15.869 | 72.854 | 1.00 | 0.00 | C |
| ATOM | 6924 | N   | PHE C 815 | 96.530  | 18.653 | 74.588 | 1.00 | 0.00 | N |
| ATOM | 6925 | CA  | PHE C 815 | 96.679  | 19.360 | 75.830 | 1.00 | 0.00 | C |
| ATOM | 6926 | C   | PHE C 815 | 95.592  | 19.007 | 76.797 | 1.00 | 0.00 | C |
| ATOM | 6927 | O   | PHE C 815 | 95.803  | 19.086 | 78.006 | 1.00 | 0.00 | O |
| ATOM | 6928 | CB  | PHE C 815 | 96.681  | 20.894 | 75.686 | 1.00 | 0.00 | C |
| ATOM | 6929 | CG  | PHE C 815 | 98.025  | 21.323 | 75.211 | 1.00 | 0.00 | C |
| ATOM | 6930 | CD1 | PHE C 815 | 99.075  | 21.403 | 76.101 | 1.00 | 0.00 | C |
| ATOM | 6931 | CD2 | PHE C 815 | 98.247  | 21.670 | 73.899 | 1.00 | 0.00 | C |
| ATOM | 6932 | CE1 | PHE C 815 | 100.322 | 21.803 | 75.681 | 1.00 | 0.00 | C |
| ATOM | 6933 | CE2 | PHE C 815 | 99.491  | 22.069 | 73.471 | 1.00 | 0.00 | C |
| ATOM | 6934 | CZ  | PHE C 815 | 100.531 | 22.135 | 74.366 | 1.00 | 0.00 | C |
| ATOM | 6935 | N   | ARG C 816 | 94.390  | 18.645 | 76.317 | 1.00 | 0.00 | N |
| ATOM | 6936 | CA  | ARG C 816 | 93.316  | 18.443 | 77.251 | 1.00 | 0.00 | C |
| ATOM | 6937 | C   | ARG C 816 | 93.665  | 17.385 | 78.253 | 1.00 | 0.00 | C |
| ATOM | 6938 | O   | ARG C 816 | 93.413  | 17.556 | 79.442 | 1.00 | 0.00 | O |
| ATOM | 6939 | CB  | ARG C 816 | 91.983  | 18.011 | 76.620 | 1.00 | 0.00 | C |
| ATOM | 6940 | CG  | ARG C 816 | 90.898  | 17.854 | 77.693 | 1.00 | 0.00 | C |
| ATOM | 6941 | CD  | ARG C 816 | 89.574  | 17.274 | 77.194 | 1.00 | 0.00 | C |
| ATOM | 6942 | NE  | ARG C 816 | 88.994  | 18.240 | 76.223 | 1.00 | 0.00 | N |
| ATOM | 6943 | CZ  | ARG C 816 | 87.642  | 18.265 | 76.036 | 1.00 | 0.00 | C |
| ATOM | 6944 | NH1 | ARG C 816 | 86.839  | 17.463 | 76.793 | 1.00 | 0.00 | N |
| ATOM | 6945 | NH2 | ARG C 816 | 87.095  | 19.087 | 75.094 | 1.00 | 0.00 | N |

|        |      |     |     |   |     |         |        |        |      |      |   |
|--------|------|-----|-----|---|-----|---------|--------|--------|------|------|---|
| ATOM   | 6946 | N   | LEU | C | 817 | 94.262  | 16.268 | 77.800 | 1.00 | 0.00 | N |
| ATOM   | 6947 | CA  | LEU | C | 817 | 94.591  | 15.158 | 78.654 | 1.00 | 0.00 | C |
| ATOM   | 6948 | C   | LEU | C | 817 | 95.631  | 15.594 | 79.646 | 1.00 | 0.00 | C |
| ATOM   | 6949 | O   | LEU | C | 817 | 95.609  | 15.170 | 80.803 | 1.00 | 0.00 | O |
| ATOM   | 6950 | CB  | LEU | C | 817 | 95.125  | 13.956 | 77.838 | 1.00 | 0.00 | C |
| ATOM   | 6951 | CG  | LEU | C | 817 | 95.341  | 12.619 | 78.588 | 1.00 | 0.00 | C |
| ATOM   | 6952 | CD1 | LEU | C | 817 | 95.808  | 11.531 | 77.608 | 1.00 | 0.00 | C |
| ATOM   | 6953 | CD2 | LEU | C | 817 | 96.309  | 12.732 | 79.776 | 1.00 | 0.00 | C |
| HETATM | 6954 | N   | HIE | C | 818 | 96.544  | 16.491 | 79.234 | 1.00 | 0.00 | N |
| HETATM | 6955 | CA  | HIE | C | 818 | 97.688  | 16.855 | 80.030 | 1.00 | 0.00 | C |
| HETATM | 6956 | C   | HIE | C | 818 | 97.283  | 17.354 | 81.386 | 1.00 | 0.00 | C |
| HETATM | 6957 | O   | HIE | C | 818 | 97.851  | 16.920 | 82.391 | 1.00 | 0.00 | O |
| HETATM | 6958 | CB  | HIE | C | 818 | 98.547  | 17.947 | 79.376 | 1.00 | 0.00 | C |
| HETATM | 6959 | CG  | HIE | C | 818 | 99.819  | 18.195 | 80.126 | 1.00 | 0.00 | C |
| HETATM | 6960 | CD2 | HIE | C | 818 | 100.100 | 19.107 | 81.095 | 1.00 | 0.00 | C |
| HETATM | 6961 | ND1 | HIE | C | 818 | 100.977 | 17.472 | 79.943 | 1.00 | 0.00 | N |
| HETATM | 6962 | CE1 | HIE | C | 818 | 101.894 | 17.978 | 80.804 | 1.00 | 0.00 | C |
| HETATM | 6963 | NE2 | HIE | C | 818 | 101.409 | 18.970 | 81.526 | 1.00 | 0.00 | N |
| ATOM   | 6964 | N   | SER | C | 819 | 96.262  | 18.231 | 81.472 | 1.00 | 0.00 | N |
| ATOM   | 6965 | CA  | SER | C | 819 | 95.827  | 18.757 | 82.737 | 1.00 | 0.00 | C |
| ATOM   | 6966 | C   | SER | C | 819 | 96.968  | 19.312 | 83.542 | 1.00 | 0.00 | C |
| ATOM   | 6967 | O   | SER | C | 819 | 97.574  | 18.604 | 84.343 | 1.00 | 0.00 | O |
| ATOM   | 6968 | CB  | SER | C | 819 | 95.101  | 17.705 | 83.588 | 1.00 | 0.00 | C |
| ATOM   | 6969 | OG  | SER | C | 819 | 94.692  | 18.271 | 84.822 | 1.00 | 0.00 | O |
| ATOM   | 6970 | N   | SER | C | 820 | 97.319  | 20.597 | 83.308 | 1.00 | 0.00 | N |
| ATOM   | 6971 | CA  | SER | C | 820 | 98.379  | 21.207 | 84.064 | 1.00 | 0.00 | C |
| ATOM   | 6972 | C   | SER | C | 820 | 98.064  | 22.664 | 84.237 | 1.00 | 0.00 | C |
| ATOM   | 6973 | O   | SER | C | 820 | 97.038  | 23.153 | 83.770 | 1.00 | 0.00 | O |
| ATOM   | 6974 | CB  | SER | C | 820 | 99.746  | 21.093 | 83.364 | 1.00 | 0.00 | C |
| ATOM   | 6975 | OG  | SER | C | 820 | 100.772 | 21.662 | 84.164 | 1.00 | 0.00 | O |
| ATOM   | 6976 | N   | ASN | C | 821 | 98.928  | 23.394 | 84.974 | 1.00 | 0.00 | N |
| ATOM   | 6977 | CA  | ASN | C | 821 | 98.727  | 24.803 | 85.142 | 1.00 | 0.00 | C |
| ATOM   | 6978 | C   | ASN | C | 821 | 99.249  | 25.487 | 83.924 | 1.00 | 0.00 | C |
| ATOM   | 6979 | O   | ASN | C | 821 | 100.107 | 24.961 | 83.216 | 1.00 | 0.00 | O |
| ATOM   | 6980 | CB  | ASN | C | 821 | 99.430  | 25.407 | 86.367 | 1.00 | 0.00 | C |
| ATOM   | 6981 | CG  | ASN | C | 821 | 98.597  | 25.054 | 87.587 | 1.00 | 0.00 | C |
| ATOM   | 6982 | ND2 | ASN | C | 821 | 99.267  | 24.565 | 88.665 | 1.00 | 0.00 | N |
| ATOM   | 6983 | OD1 | ASN | C | 821 | 97.377  | 25.212 | 87.585 | 1.00 | 0.00 | O |
| ATOM   | 6984 | N   | LYS | C | 822 | 98.697  | 26.680 | 83.639 | 1.00 | 0.00 | N |
| ATOM   | 6985 | CA  | LYS | C | 822 | 99.059  | 27.481 | 82.502 | 1.00 | 0.00 | C |
| ATOM   | 6986 | C   | LYS | C | 822 | 98.538  | 26.810 | 81.268 | 1.00 | 0.00 | C |
| ATOM   | 6987 | O   | LYS | C | 822 | 98.669  | 27.322 | 80.158 | 1.00 | 0.00 | O |
| ATOM   | 6988 | CB  | LYS | C | 822 | 100.581 | 27.660 | 82.380 | 1.00 | 0.00 | C |
| ATOM   | 6989 | CG  | LYS | C | 822 | 101.171 | 28.414 | 83.573 | 1.00 | 0.00 | C |

|      |      |     |     |   |     |         |        |        |      |      |     |
|------|------|-----|-----|---|-----|---------|--------|--------|------|------|-----|
| ATOM | 6990 | CD  | LYS | C | 822 | 102.691 | 28.314 | 83.695 | 1.00 | 0.00 | C   |
| ATOM | 6991 | CE  | LYS | C | 822 | 103.233 | 28.907 | 84.998 | 1.00 | 0.00 | C   |
| ATOM | 6992 | NZ  | LYS | C | 822 | 102.835 | 28.056 | 86.142 | 1.00 | 0.00 | N1+ |
| ATOM | 6993 | N   | SER | C | 823 | 97.902  | 25.639 | 81.457 | 1.00 | 0.00 | N   |
| ATOM | 6994 | CA  | SER | C | 823 | 97.233  | 24.912 | 80.422 | 1.00 | 0.00 | C   |
| ATOM | 6995 | C   | SER | C | 823 | 96.508  | 23.841 | 81.167 | 1.00 | 0.00 | C   |
| ATOM | 6996 | O   | SER | C | 823 | 96.995  | 22.717 | 81.275 | 1.00 | 0.00 | O   |
| ATOM | 6997 | CB  | SER | C | 823 | 98.191  | 24.221 | 79.438 | 1.00 | 0.00 | C   |
| ATOM | 6998 | OG  | SER | C | 823 | 97.452  | 23.521 | 78.450 | 1.00 | 0.00 | O   |
| ATOM | 6999 | N   | SER | C | 824 | 95.320  | 24.179 | 81.701 | 1.00 | 0.00 | N   |
| ATOM | 7000 | CA  | SER | C | 824 | 94.562  | 23.268 | 82.507 | 1.00 | 0.00 | C   |
| ATOM | 7001 | C   | SER | C | 824 | 93.407  | 22.793 | 81.710 | 1.00 | 0.00 | C   |
| ATOM | 7002 | O   | SER | C | 824 | 93.345  | 22.968 | 80.493 | 1.00 | 0.00 | O   |
| ATOM | 7003 | CB  | SER | C | 824 | 93.944  | 23.914 | 83.760 | 1.00 | 0.00 | C   |
| ATOM | 7004 | OG  | SER | C | 824 | 94.954  | 24.402 | 84.630 | 1.00 | 0.00 | O   |
| ATOM | 7005 | N   | LEU | C | 825 | 92.446  | 22.161 | 82.406 | 1.00 | 0.00 | N   |
| ATOM | 7006 | CA  | LEU | C | 825 | 91.266  | 21.766 | 81.716 | 1.00 | 0.00 | C   |
| ATOM | 7007 | C   | LEU | C | 825 | 90.655  | 23.032 | 81.235 | 1.00 | 0.00 | C   |
| ATOM | 7008 | O   | LEU | C | 825 | 90.079  | 23.087 | 80.151 | 1.00 | 0.00 | O   |
| ATOM | 7009 | CB  | LEU | C | 825 | 90.211  | 21.036 | 82.559 | 1.00 | 0.00 | C   |
| ATOM | 7010 | CG  | LEU | C | 825 | 88.912  | 20.853 | 81.754 | 1.00 | 0.00 | C   |
| ATOM | 7011 | CD1 | LEU | C | 825 | 89.176  | 20.147 | 80.420 | 1.00 | 0.00 | C   |
| ATOM | 7012 | CD2 | LEU | C | 825 | 87.820  | 20.154 | 82.567 | 1.00 | 0.00 | C   |
| ATOM | 7013 | N   | TYR | C | 826 | 90.777  | 24.092 | 82.049 | 1.00 | 0.00 | N   |
| ATOM | 7014 | CA  | TYR | C | 826 | 90.227  | 25.351 | 81.660 | 1.00 | 0.00 | C   |
| ATOM | 7015 | C   | TYR | C | 826 | 90.943  | 25.776 | 80.418 | 1.00 | 0.00 | C   |
| ATOM | 7016 | O   | TYR | C | 826 | 90.324  | 26.257 | 79.471 | 1.00 | 0.00 | O   |
| ATOM | 7017 | CB  | TYR | C | 826 | 90.417  | 26.449 | 82.715 | 1.00 | 0.00 | C   |
| ATOM | 7018 | CG  | TYR | C | 826 | 89.686  | 27.644 | 82.206 | 1.00 | 0.00 | C   |
| ATOM | 7019 | CD1 | TYR | C | 826 | 88.326  | 27.743 | 82.384 | 1.00 | 0.00 | C   |
| ATOM | 7020 | CD2 | TYR | C | 826 | 90.353  | 28.655 | 81.554 | 1.00 | 0.00 | C   |
| ATOM | 7021 | CE1 | TYR | C | 826 | 87.637  | 28.838 | 81.921 | 1.00 | 0.00 | C   |
| ATOM | 7022 | CE2 | TYR | C | 826 | 89.669  | 29.752 | 81.087 | 1.00 | 0.00 | C   |
| ATOM | 7023 | CZ  | TYR | C | 826 | 88.309  | 29.843 | 81.271 | 1.00 | 0.00 | C   |
| ATOM | 7024 | OH  | TYR | C | 826 | 87.601  | 30.965 | 80.789 | 1.00 | 0.00 | O   |
| ATOM | 7025 | N   | SER | C | 827 | 92.276  | 25.595 | 80.389 | 1.00 | 0.00 | N   |
| ATOM | 7026 | CA  | SER | C | 827 | 93.039  | 26.003 | 79.244 | 1.00 | 0.00 | C   |
| ATOM | 7027 | C   | SER | C | 827 | 92.579  | 25.211 | 78.067 | 1.00 | 0.00 | C   |
| ATOM | 7028 | O   | SER | C | 827 | 92.431  | 25.743 | 76.967 | 1.00 | 0.00 | O   |
| ATOM | 7029 | CB  | SER | C | 827 | 94.546  | 25.752 | 79.402 | 1.00 | 0.00 | C   |
| ATOM | 7030 | OG  | SER | C | 827 | 95.233  | 26.178 | 78.234 | 1.00 | 0.00 | O   |
| ATOM | 7031 | N   | GLY | C | 828 | 92.324  | 23.906 | 78.267 | 1.00 | 0.00 | N   |
| ATOM | 7032 | CA  | GLY | C | 828 | 91.914  | 23.072 | 77.178 | 1.00 | 0.00 | C   |
| ATOM | 7033 | C   | GLY | C | 828 | 90.616  | 23.591 | 76.662 | 1.00 | 0.00 | C   |

|      |      |     |           |        |        |        |      |      |   |
|------|------|-----|-----------|--------|--------|--------|------|------|---|
| ATOM | 7034 | O   | GLY C 828 | 90.388 | 23.632 | 75.455 | 1.00 | 0.00 | O |
| ATOM | 7035 | N   | ARG C 829 | 89.718 | 23.992 | 77.577 | 1.00 | 0.00 | N |
| ATOM | 7036 | CA  | ARG C 829 | 88.443 | 24.485 | 77.146 | 1.00 | 0.00 | C |
| ATOM | 7037 | C   | ARG C 829 | 88.647 | 25.742 | 76.371 | 1.00 | 0.00 | C |
| ATOM | 7038 | O   | ARG C 829 | 87.954 | 25.991 | 75.391 | 1.00 | 0.00 | O |
| ATOM | 7039 | CB  | ARG C 829 | 87.457 | 24.779 | 78.288 | 1.00 | 0.00 | C |
| ATOM | 7040 | CG  | ARG C 829 | 86.792 | 23.511 | 78.824 | 1.00 | 0.00 | C |
| ATOM | 7041 | CD  | ARG C 829 | 85.495 | 23.777 | 79.590 | 1.00 | 0.00 | C |
| ATOM | 7042 | NE  | ARG C 829 | 85.852 | 24.415 | 80.886 | 1.00 | 0.00 | N |
| ATOM | 7043 | CZ  | ARG C 829 | 85.968 | 23.644 | 82.007 | 1.00 | 0.00 | C |
| ATOM | 7044 | NH1 | ARG C 829 | 85.725 | 22.303 | 81.940 | 1.00 | 0.00 | N |
| ATOM | 7045 | NH2 | ARG C 829 | 86.323 | 24.218 | 83.192 | 1.00 | 0.00 | N |
| ATOM | 7046 | N   | VAL C 830 | 89.619 | 26.573 | 76.792 | 1.00 | 0.00 | N |
| ATOM | 7047 | CA  | VAL C 830 | 89.833 | 27.832 | 76.135 | 1.00 | 0.00 | C |
| ATOM | 7048 | C   | VAL C 830 | 90.195 | 27.595 | 74.701 | 1.00 | 0.00 | C |
| ATOM | 7049 | O   | VAL C 830 | 89.655 | 28.230 | 73.799 | 1.00 | 0.00 | O |
| ATOM | 7050 | CB  | VAL C 830 | 90.954 | 28.616 | 76.749 | 1.00 | 0.00 | C |
| ATOM | 7051 | CG1 | VAL C 830 | 91.179 | 29.887 | 75.911 | 1.00 | 0.00 | C |
| ATOM | 7052 | CG2 | VAL C 830 | 90.612 | 28.890 | 78.224 | 1.00 | 0.00 | C |
| ATOM | 7053 | N   | ILE C 831 | 91.105 | 26.644 | 74.457 | 1.00 | 0.00 | N |
| ATOM | 7054 | CA  | ILE C 831 | 91.603 | 26.352 | 73.146 | 1.00 | 0.00 | C |
| ATOM | 7055 | C   | ILE C 831 | 90.465 | 25.882 | 72.306 | 1.00 | 0.00 | C |
| ATOM | 7056 | O   | ILE C 831 | 90.335 | 26.248 | 71.138 | 1.00 | 0.00 | O |
| ATOM | 7057 | CB  | ILE C 831 | 92.542 | 25.195 | 73.213 | 1.00 | 0.00 | C |
| ATOM | 7058 | CG1 | ILE C 831 | 93.685 | 25.508 | 74.179 | 1.00 | 0.00 | C |
| ATOM | 7059 | CG2 | ILE C 831 | 92.987 | 24.829 | 71.794 | 1.00 | 0.00 | C |
| ATOM | 7060 | CD1 | ILE C 831 | 94.366 | 24.245 | 74.690 | 1.00 | 0.00 | C |
| ATOM | 7061 | N   | PHE C 832 | 89.616 | 25.037 | 72.905 | 1.00 | 0.00 | N |
| ATOM | 7062 | CA  | PHE C 832 | 88.539 | 24.387 | 72.223 | 1.00 | 0.00 | C |
| ATOM | 7063 | C   | PHE C 832 | 87.599 | 25.449 | 71.732 | 1.00 | 0.00 | C |
| ATOM | 7064 | O   | PHE C 832 | 87.122 | 25.390 | 70.600 | 1.00 | 0.00 | O |
| ATOM | 7065 | CB  | PHE C 832 | 87.801 | 23.446 | 73.194 | 1.00 | 0.00 | C |
| ATOM | 7066 | CG  | PHE C 832 | 87.162 | 22.311 | 72.465 | 1.00 | 0.00 | C |
| ATOM | 7067 | CD1 | PHE C 832 | 87.931 | 21.251 | 72.044 | 1.00 | 0.00 | C |
| ATOM | 7068 | CD2 | PHE C 832 | 85.812 | 22.274 | 72.233 | 1.00 | 0.00 | C |
| ATOM | 7069 | CE1 | PHE C 832 | 87.365 | 20.188 | 71.386 | 1.00 | 0.00 | C |
| ATOM | 7070 | CE2 | PHE C 832 | 85.234 | 21.214 | 71.573 | 1.00 | 0.00 | C |
| ATOM | 7071 | CZ  | PHE C 832 | 86.012 | 20.166 | 71.143 | 1.00 | 0.00 | C |
| ATOM | 7072 | N   | CYS C 833 | 87.310 | 26.453 | 72.581 | 1.00 | 0.00 | N |
| ATOM | 7073 | CA  | CYS C 833 | 86.407 | 27.513 | 72.225 | 1.00 | 0.00 | C |
| ATOM | 7074 | C   | CYS C 833 | 86.971 | 28.302 | 71.087 | 1.00 | 0.00 | C |
| ATOM | 7075 | O   | CYS C 833 | 86.257 | 28.640 | 70.144 | 1.00 | 0.00 | O |
| ATOM | 7076 | CB  | CYS C 833 | 86.170 | 28.501 | 73.383 | 1.00 | 0.00 | C |
| ATOM | 7077 | SG  | CYS C 833 | 85.026 | 29.843 | 72.933 | 1.00 | 0.00 | S |

|                         |        |        |        |      |      |   |
|-------------------------|--------|--------|--------|------|------|---|
| ATOM 7078 N LEU C 834   | 88.283 | 28.605 | 71.139 | 1.00 | 0.00 | N |
| ATOM 7079 CA LEU C 834  | 88.907 | 29.415 | 70.130 | 1.00 | 0.00 | C |
| ATOM 7080 C LEU C 834   | 88.833 | 28.698 | 68.824 | 1.00 | 0.00 | C |
| ATOM 7081 O LEU C 834   | 88.572 | 29.306 | 67.789 | 1.00 | 0.00 | O |
| ATOM 7082 CB LEU C 834  | 90.392 | 29.695 | 70.426 | 1.00 | 0.00 | C |
| ATOM 7083 CG LEU C 834  | 90.604 | 30.534 | 71.700 | 1.00 | 0.00 | C |
| ATOM 7084 CD1 LEU C 834 | 92.094 | 30.817 | 71.943 | 1.00 | 0.00 | C |
| ATOM 7085 CD2 LEU C 834 | 89.746 | 31.809 | 71.679 | 1.00 | 0.00 | C |
| ATOM 7086 N ASP C 835   | 89.044 | 27.371 | 68.847 | 1.00 | 0.00 | N |
| ATOM 7087 CA ASP C 835  | 89.026 | 26.605 | 67.639 | 1.00 | 0.00 | C |
| ATOM 7088 C ASP C 835   | 87.661 | 26.742 | 67.056 | 1.00 | 0.00 | C |
| ATOM 7089 O ASP C 835   | 87.504 | 26.879 | 65.846 | 1.00 | 0.00 | O |
| ATOM 7090 CB ASP C 835  | 89.276 | 25.110 | 67.894 | 1.00 | 0.00 | C |
| ATOM 7091 CG ASP C 835  | 90.709 | 24.954 | 68.385 | 1.00 | 0.00 | C |
| ATOM 7092 OD1 ASP C 835 | 91.576 | 25.755 | 67.946 | 1.00 | 0.00 | O |
| ATOM 7093 OD2 ASP C 835 | 90.954 | 24.037 | 69.213 | 1.00 | 0.00 | O |
| ATOM 7094 N TYR C 836   | 86.640 | 26.757 | 67.924 | 1.00 | 0.00 | N |
| ATOM 7095 CA TYR C 836  | 85.275 | 26.855 | 67.496 | 1.00 | 0.00 | C |
| ATOM 7096 C TYR C 836   | 85.117 | 28.122 | 66.724 | 1.00 | 0.00 | C |
| ATOM 7097 O TYR C 836   | 84.478 | 28.138 | 65.673 | 1.00 | 0.00 | O |
| ATOM 7098 CB TYR C 836  | 84.298 | 26.918 | 68.684 | 1.00 | 0.00 | C |
| ATOM 7099 CG TYR C 836  | 82.952 | 27.326 | 68.185 | 1.00 | 0.00 | C |
| ATOM 7100 CD1 TYR C 836 | 82.064 | 26.404 | 67.686 | 1.00 | 0.00 | C |
| ATOM 7101 CD2 TYR C 836 | 82.582 | 28.650 | 68.229 | 1.00 | 0.00 | C |
| ATOM 7102 CE1 TYR C 836 | 80.829 | 26.805 | 67.233 | 1.00 | 0.00 | C |
| ATOM 7103 CE2 TYR C 836 | 81.349 | 29.057 | 67.776 | 1.00 | 0.00 | C |
| ATOM 7104 CZ TYR C 836  | 80.468 | 28.129 | 67.276 | 1.00 | 0.00 | C |
| ATOM 7105 OH TYR C 836  | 79.199 | 28.536 | 66.812 | 1.00 | 0.00 | O |
| ATOM 7106 N ILE C 837   | 85.708 | 29.222 | 67.221 | 1.00 | 0.00 | N |
| ATOM 7107 CA ILE C 837  | 85.543 | 30.493 | 66.582 | 1.00 | 0.00 | C |
| ATOM 7108 C ILE C 837   | 86.118 | 30.439 | 65.201 | 1.00 | 0.00 | C |
| ATOM 7109 O ILE C 837   | 85.488 | 30.887 | 64.247 | 1.00 | 0.00 | O |
| ATOM 7110 CB ILE C 837  | 86.243 | 31.601 | 67.310 | 1.00 | 0.00 | C |
| ATOM 7111 CG1 ILE C 837 | 85.688 | 31.742 | 68.736 | 1.00 | 0.00 | C |
| ATOM 7112 CG2 ILE C 837 | 86.095 | 32.875 | 66.465 | 1.00 | 0.00 | C |
| ATOM 7113 CD1 ILE C 837 | 86.542 | 32.638 | 69.632 | 1.00 | 0.00 | C |
| ATOM 7114 N ILE C 838   | 87.329 | 29.870 | 65.054 | 1.00 | 0.00 | N |
| ATOM 7115 CA ILE C 838  | 87.971 | 29.858 | 63.771 | 1.00 | 0.00 | C |
| ATOM 7116 C ILE C 838   | 87.176 | 29.037 | 62.810 | 1.00 | 0.00 | C |
| ATOM 7117 O ILE C 838   | 87.052 | 29.403 | 61.642 | 1.00 | 0.00 | O |
| ATOM 7118 CB ILE C 838  | 89.382 | 29.336 | 63.787 | 1.00 | 0.00 | C |
| ATOM 7119 CG1 ILE C 838 | 90.092 | 29.714 | 62.476 | 1.00 | 0.00 | C |
| ATOM 7120 CG2 ILE C 838 | 89.337 | 27.820 | 64.040 | 1.00 | 0.00 | C |
| ATOM 7121 CD1 ILE C 838 | 90.298 | 31.221 | 62.309 | 1.00 | 0.00 | C |



|      |      |     |     |   |     |        |        |        |      |      |   |
|------|------|-----|-----|---|-----|--------|--------|--------|------|------|---|
| ATOM | 7122 | N   | PHE | C | 839 | 86.616 | 27.900 | 63.265 | 1.00 | 0.00 | N |
| ATOM | 7123 | CA  | PHE | C | 839 | 85.880 | 27.065 | 62.362 | 1.00 | 0.00 | C |
| ATOM | 7124 | C   | PHE | C | 839 | 84.732 | 27.853 | 61.834 | 1.00 | 0.00 | C |
| ATOM | 7125 | O   | PHE | C | 839 | 84.430 | 27.811 | 60.644 | 1.00 | 0.00 | O |
| ATOM | 7126 | CB  | PHE | C | 839 | 85.326 | 25.771 | 62.989 | 1.00 | 0.00 | C |
| ATOM | 7127 | CG  | PHE | C | 839 | 86.481 | 24.866 | 63.257 | 1.00 | 0.00 | C |
| ATOM | 7128 | CD1 | PHE | C | 839 | 87.175 | 24.294 | 62.213 | 1.00 | 0.00 | C |
| ATOM | 7129 | CD2 | PHE | C | 839 | 86.857 | 24.564 | 64.541 | 1.00 | 0.00 | C |
| ATOM | 7130 | CE1 | PHE | C | 839 | 88.239 | 23.457 | 62.449 | 1.00 | 0.00 | C |
| ATOM | 7131 | CE2 | PHE | C | 839 | 87.922 | 23.729 | 64.788 | 1.00 | 0.00 | C |
| ATOM | 7132 | CZ  | PHE | C | 839 | 88.617 | 23.175 | 63.739 | 1.00 | 0.00 | C |
| ATOM | 7133 | N   | THR | C | 840 | 84.076 | 28.624 | 62.711 | 1.00 | 0.00 | N |
| ATOM | 7134 | CA  | THR | C | 840 | 82.930 | 29.389 | 62.333 | 1.00 | 0.00 | C |
| ATOM | 7135 | C   | THR | C | 840 | 83.372 | 30.363 | 61.284 | 1.00 | 0.00 | C |
| ATOM | 7136 | O   | THR | C | 840 | 82.670 | 30.599 | 60.303 | 1.00 | 0.00 | O |
| ATOM | 7137 | CB  | THR | C | 840 | 82.409 | 30.175 | 63.494 | 1.00 | 0.00 | C |
| ATOM | 7138 | CG2 | THR | C | 840 | 81.049 | 30.769 | 63.110 | 1.00 | 0.00 | C |
| ATOM | 7139 | OG1 | THR | C | 840 | 82.228 | 29.310 | 64.602 | 1.00 | 0.00 | O |
| ATOM | 7140 | N   | LEU | C | 841 | 84.579 | 30.931 | 61.461 | 1.00 | 0.00 | N |
| ATOM | 7141 | CA  | LEU | C | 841 | 85.082 | 31.928 | 60.562 | 1.00 | 0.00 | C |
| ATOM | 7142 | C   | LEU | C | 841 | 85.187 | 31.310 | 59.206 | 1.00 | 0.00 | C |
| ATOM | 7143 | O   | LEU | C | 841 | 84.888 | 31.944 | 58.196 | 1.00 | 0.00 | O |
| ATOM | 7144 | CB  | LEU | C | 841 | 86.477 | 32.435 | 60.959 | 1.00 | 0.00 | C |
| ATOM | 7145 | CG  | LEU | C | 841 | 87.030 | 33.508 | 60.004 | 1.00 | 0.00 | C |
| ATOM | 7146 | CD1 | LEU | C | 841 | 86.176 | 34.785 | 60.056 | 1.00 | 0.00 | C |
| ATOM | 7147 | CD2 | LEU | C | 841 | 88.518 | 33.779 | 60.266 | 1.00 | 0.00 | C |
| ATOM | 7148 | N   | ARG | C | 842 | 85.614 | 30.042 | 59.161 | 1.00 | 0.00 | N |
| ATOM | 7149 | CA  | ARG | C | 842 | 85.774 | 29.299 | 57.946 | 1.00 | 0.00 | C |
| ATOM | 7150 | C   | ARG | C | 842 | 84.439 | 29.239 | 57.271 | 1.00 | 0.00 | C |
| ATOM | 7151 | O   | ARG | C | 842 | 84.326 | 29.466 | 56.066 | 1.00 | 0.00 | O |
| ATOM | 7152 | CB  | ARG | C | 842 | 86.225 | 27.874 | 58.298 | 1.00 | 0.00 | C |
| ATOM | 7153 | CG  | ARG | C | 842 | 86.268 | 26.838 | 57.179 | 1.00 | 0.00 | C |
| ATOM | 7154 | CD  | ARG | C | 842 | 86.736 | 25.497 | 57.752 | 1.00 | 0.00 | C |
| ATOM | 7155 | NE  | ARG | C | 842 | 86.598 | 24.440 | 56.719 | 1.00 | 0.00 | N |
| ATOM | 7156 | CZ  | ARG | C | 842 | 87.076 | 23.192 | 56.991 | 1.00 | 0.00 | C |
| ATOM | 7157 | NH1 | ARG | C | 842 | 87.743 | 22.956 | 58.161 | 1.00 | 0.00 | N |
| ATOM | 7158 | NH2 | ARG | C | 842 | 86.892 | 22.177 | 56.100 | 1.00 | 0.00 | N |
| ATOM | 7159 | N   | LEU | C | 843 | 83.374 | 28.955 | 58.043 | 1.00 | 0.00 | N |
| ATOM | 7160 | CA  | LEU | C | 843 | 82.070 | 28.867 | 57.460 | 1.00 | 0.00 | C |
| ATOM | 7161 | C   | LEU | C | 843 | 81.694 | 30.193 | 56.899 | 1.00 | 0.00 | C |
| ATOM | 7162 | O   | LEU | C | 843 | 81.138 | 30.275 | 55.807 | 1.00 | 0.00 | O |
| ATOM | 7163 | CB  | LEU | C | 843 | 80.963 | 28.462 | 58.447 | 1.00 | 0.00 | C |
| ATOM | 7164 | CG  | LEU | C | 843 | 80.974 | 26.966 | 58.813 | 1.00 | 0.00 | C |
| ATOM | 7165 | CD1 | LEU | C | 843 | 82.284 | 26.560 | 59.494 | 1.00 | 0.00 | C |

|        |      |     |     |   |     |        |        |        |      |      |   |
|--------|------|-----|-----|---|-----|--------|--------|--------|------|------|---|
| ATOM   | 7166 | CD2 | LEU | C | 843 | 79.728 | 26.586 | 59.629 | 1.00 | 0.00 | C |
| ATOM   | 7167 | N   | ILE | C | 844 | 82.022 | 31.278 | 57.619 | 1.00 | 0.00 | N |
| ATOM   | 7168 | CA  | ILE | C | 844 | 81.623 | 32.583 | 57.193 | 1.00 | 0.00 | C |
| ATOM   | 7169 | C   | ILE | C | 844 | 82.207 | 32.824 | 55.840 | 1.00 | 0.00 | C |
| ATOM   | 7170 | O   | ILE | C | 844 | 81.528 | 33.318 | 54.942 | 1.00 | 0.00 | O |
| ATOM   | 7171 | CB  | ILE | C | 844 | 82.144 | 33.647 | 58.109 | 1.00 | 0.00 | C |
| ATOM   | 7172 | CG1 | ILE | C | 844 | 81.575 | 33.436 | 59.519 | 1.00 | 0.00 | C |
| ATOM   | 7173 | CG2 | ILE | C | 844 | 81.812 | 35.014 | 57.488 | 1.00 | 0.00 | C |
| ATOM   | 7174 | CD1 | ILE | C | 844 | 82.333 | 34.187 | 60.608 | 1.00 | 0.00 | C |
| HETATM | 7175 | N   | HIE | C | 845 | 83.484 | 32.454 | 55.651 | 1.00 | 0.00 | N |
| HETATM | 7176 | CA  | HIE | C | 845 | 84.102 | 32.694 | 54.383 | 1.00 | 0.00 | C |
| HETATM | 7177 | C   | HIE | C | 845 | 83.374 | 31.910 | 53.338 | 1.00 | 0.00 | C |
| HETATM | 7178 | O   | HIE | C | 845 | 83.186 | 32.382 | 52.221 | 1.00 | 0.00 | O |
| HETATM | 7179 | CB  | HIE | C | 845 | 85.580 | 32.294 | 54.310 | 1.00 | 0.00 | C |
| HETATM | 7180 | CG  | HIE | C | 845 | 86.179 | 32.702 | 52.998 | 1.00 | 0.00 | C |
| HETATM | 7181 | CD2 | HIE | C | 845 | 86.440 | 31.963 | 51.884 | 1.00 | 0.00 | C |
| HETATM | 7182 | ND1 | HIE | C | 845 | 86.569 | 33.987 | 52.693 | 1.00 | 0.00 | N |
| HETATM | 7183 | CE1 | HIE | C | 845 | 87.041 | 33.966 | 51.425 | 1.00 | 0.00 | C |
| HETATM | 7184 | NE2 | HIE | C | 845 | 86.984 | 32.758 | 50.890 | 1.00 | 0.00 | N |
| ATOM   | 7185 | N   | ILE | C | 846 | 82.942 | 30.686 | 53.683 | 1.00 | 0.00 | N |
| ATOM   | 7186 | CA  | ILE | C | 846 | 82.276 | 29.848 | 52.731 | 1.00 | 0.00 | C |
| ATOM   | 7187 | C   | ILE | C | 846 | 81.029 | 30.547 | 52.288 | 1.00 | 0.00 | C |
| ATOM   | 7188 | O   | ILE | C | 846 | 80.715 | 30.575 | 51.100 | 1.00 | 0.00 | O |
| ATOM   | 7189 | CB  | ILE | C | 846 | 81.875 | 28.524 | 53.321 | 1.00 | 0.00 | C |
| ATOM   | 7190 | CG1 | ILE | C | 846 | 83.121 | 27.775 | 53.826 | 1.00 | 0.00 | C |
| ATOM   | 7191 | CG2 | ILE | C | 846 | 81.086 | 27.749 | 52.251 | 1.00 | 0.00 | C |
| ATOM   | 7192 | CD1 | ILE | C | 846 | 82.795 | 26.566 | 54.704 | 1.00 | 0.00 | C |
| ATOM   | 7193 | N   | PHE | C | 847 | 80.294 | 31.152 | 53.239 | 1.00 | 0.00 | N |
| ATOM   | 7194 | CA  | PHE | C | 847 | 79.062 | 31.805 | 52.901 | 1.00 | 0.00 | C |
| ATOM   | 7195 | C   | PHE | C | 847 | 79.372 | 32.940 | 51.973 | 1.00 | 0.00 | C |
| ATOM   | 7196 | O   | PHE | C | 847 | 78.675 | 33.152 | 50.981 | 1.00 | 0.00 | O |
| ATOM   | 7197 | CB  | PHE | C | 847 | 78.348 | 32.446 | 54.108 | 1.00 | 0.00 | C |
| ATOM   | 7198 | CG  | PHE | C | 847 | 78.050 | 31.405 | 55.135 | 1.00 | 0.00 | C |
| ATOM   | 7199 | CD1 | PHE | C | 847 | 77.093 | 30.437 | 54.917 | 1.00 | 0.00 | C |
| ATOM   | 7200 | CD2 | PHE | C | 847 | 78.711 | 31.424 | 56.341 | 1.00 | 0.00 | C |
| ATOM   | 7201 | CE1 | PHE | C | 847 | 76.831 | 29.494 | 55.879 | 1.00 | 0.00 | C |
| ATOM   | 7202 | CE2 | PHE | C | 847 | 78.452 | 30.482 | 57.308 | 1.00 | 0.00 | C |
| ATOM   | 7203 | CZ  | PHE | C | 847 | 77.507 | 29.508 | 57.077 | 1.00 | 0.00 | C |
| ATOM   | 7204 | N   | THR | C | 848 | 80.447 | 33.690 | 52.276 | 1.00 | 0.00 | N |
| ATOM   | 7205 | CA  | THR | C | 848 | 80.801 | 34.874 | 51.549 | 1.00 | 0.00 | C |
| ATOM   | 7206 | C   | THR | C | 848 | 81.053 | 34.531 | 50.118 | 1.00 | 0.00 | C |
| ATOM   | 7207 | O   | THR | C | 848 | 80.542 | 35.182 | 49.209 | 1.00 | 0.00 | O |
| ATOM   | 7208 | CB  | THR | C | 848 | 82.084 | 35.462 | 52.048 | 1.00 | 0.00 | C |
| ATOM   | 7209 | CG2 | THR | C | 848 | 82.323 | 36.797 | 51.326 | 1.00 | 0.00 | C |

|      |      |               |        |        |        |      |      |   |
|------|------|---------------|--------|--------|--------|------|------|---|
| ATOM | 7210 | OG1 THR C 848 | 82.006 | 35.677 | 53.447 | 1.00 | 0.00 | O |
| ATOM | 7211 | N VAL C 849   | 81.855 | 33.483 | 49.876 | 1.00 | 0.00 | N |
| ATOM | 7212 | CA VAL C 849  | 82.167 | 33.141 | 48.522 | 1.00 | 0.00 | C |
| ATOM | 7213 | C VAL C 849   | 80.911 | 32.725 | 47.838 | 1.00 | 0.00 | C |
| ATOM | 7214 | O VAL C 849   | 80.640 | 33.136 | 46.709 | 1.00 | 0.00 | O |
| ATOM | 7215 | CB VAL C 849  | 83.123 | 31.990 | 48.421 | 1.00 | 0.00 | C |
| ATOM | 7216 | CG1 VAL C 849 | 83.294 | 31.628 | 46.936 | 1.00 | 0.00 | C |
| ATOM | 7217 | CG2 VAL C 849 | 84.433 | 32.380 | 49.127 | 1.00 | 0.00 | C |
| ATOM | 7218 | N SER C 850   | 80.097 | 31.903 | 48.522 | 1.00 | 0.00 | N |
| ATOM | 7219 | CA SER C 850  | 78.902 | 31.370 | 47.941 | 1.00 | 0.00 | C |
| ATOM | 7220 | C SER C 850   | 77.981 | 32.493 | 47.594 | 1.00 | 0.00 | C |
| ATOM | 7221 | O SER C 850   | 77.374 | 32.495 | 46.523 | 1.00 | 0.00 | O |
| ATOM | 7222 | CB SER C 850  | 78.144 | 30.450 | 48.912 | 1.00 | 0.00 | C |
| ATOM | 7223 | OG SER C 850  | 78.952 | 29.337 | 49.265 | 1.00 | 0.00 | O |
| ATOM | 7224 | N ARG C 851   | 77.852 | 33.488 | 48.490 | 1.00 | 0.00 | N |
| ATOM | 7225 | CA ARG C 851  | 76.938 | 34.564 | 48.240 | 1.00 | 0.00 | C |
| ATOM | 7226 | C ARG C 851   | 77.365 | 35.337 | 47.034 | 1.00 | 0.00 | C |
| ATOM | 7227 | O ARG C 851   | 76.530 | 35.670 | 46.192 | 1.00 | 0.00 | O |
| ATOM | 7228 | CB ARG C 851  | 76.792 | 35.551 | 49.415 | 1.00 | 0.00 | C |
| ATOM | 7229 | CG ARG C 851  | 78.096 | 36.227 | 49.852 | 1.00 | 0.00 | C |
| ATOM | 7230 | CD ARG C 851  | 77.910 | 37.376 | 50.848 | 1.00 | 0.00 | C |
| ATOM | 7231 | NE ARG C 851  | 77.571 | 38.601 | 50.069 | 1.00 | 0.00 | N |
| ATOM | 7232 | CZ ARG C 851  | 78.557 | 39.483 | 49.729 | 1.00 | 0.00 | C |
| ATOM | 7233 | NH1 ARG C 851 | 79.841 | 39.267 | 50.145 | 1.00 | 0.00 | N |
| ATOM | 7234 | NH2 ARG C 851 | 78.262 | 40.585 | 48.980 | 1.00 | 0.00 | N |
| ATOM | 7235 | N ASN C 852   | 78.673 | 35.639 | 46.900 | 1.00 | 0.00 | N |
| ATOM | 7236 | CA ASN C 852  | 79.075 | 36.474 | 45.804 | 1.00 | 0.00 | C |
| ATOM | 7237 | C ASN C 852   | 79.876 | 35.673 | 44.817 | 1.00 | 0.00 | C |
| ATOM | 7238 | O ASN C 852   | 81.103 | 35.740 | 44.796 | 1.00 | 0.00 | O |
| ATOM | 7239 | CB ASN C 852  | 79.957 | 37.638 | 46.280 | 1.00 | 0.00 | C |
| ATOM | 7240 | CG ASN C 852  | 79.973 | 38.682 | 45.187 | 1.00 | 0.00 | C |
| ATOM | 7241 | ND2 ASN C 852 | 80.493 | 39.892 | 45.530 | 1.00 | 0.00 | N |
| ATOM | 7242 | OD1 ASN C 852 | 79.530 | 38.430 | 44.068 | 1.00 | 0.00 | O |
| ATOM | 7243 | N LEU C 853   | 79.173 | 34.864 | 44.002 | 1.00 | 0.00 | N |
| ATOM | 7244 | CA LEU C 853  | 79.691 | 34.039 | 42.943 | 1.00 | 0.00 | C |
| ATOM | 7245 | C LEU C 853   | 80.005 | 34.859 | 41.728 | 1.00 | 0.00 | C |
| ATOM | 7246 | O LEU C 853   | 80.923 | 34.537 | 40.978 | 1.00 | 0.00 | O |
| ATOM | 7247 | CB LEU C 853  | 78.672 | 32.932 | 42.570 | 1.00 | 0.00 | C |
| ATOM | 7248 | CG LEU C 853  | 79.090 | 31.890 | 41.504 | 1.00 | 0.00 | C |
| ATOM | 7249 | CD1 LEU C 853 | 78.034 | 30.777 | 41.423 | 1.00 | 0.00 | C |
| ATOM | 7250 | CD2 LEU C 853 | 79.326 | 32.493 | 40.110 | 1.00 | 0.00 | C |
| ATOM | 7251 | N GLY C 854   | 79.222 | 35.935 | 41.503 | 1.00 | 0.00 | N |
| ATOM | 7252 | CA GLY C 854  | 79.231 | 36.733 | 40.300 | 1.00 | 0.00 | C |
| ATOM | 7253 | C GLY C 854   | 80.598 | 37.182 | 39.898 | 1.00 | 0.00 | C |

|      |      |     |           |        |        |        |      |      |     |
|------|------|-----|-----------|--------|--------|--------|------|------|-----|
| ATOM | 7254 | O   | GLY C 854 | 81.599 | 36.929 | 40.562 | 1.00 | 0.00 | O   |
| ATOM | 7255 | N   | PRO C 855 | 80.602 | 38.010 | 38.856 | 1.00 | 0.00 | N   |
| ATOM | 7256 | CA  | PRO C 855 | 81.761 | 38.656 | 38.300 | 1.00 | 0.00 | C   |
| ATOM | 7257 | C   | PRO C 855 | 82.531 | 39.382 | 39.345 | 1.00 | 0.00 | C   |
| ATOM | 7258 | O   | PRO C 855 | 83.666 | 39.794 | 39.112 | 1.00 | 0.00 | O   |
| ATOM | 7259 | CB  | PRO C 855 | 81.256 | 39.488 | 37.127 | 1.00 | 0.00 | C   |
| ATOM | 7260 | CG  | PRO C 855 | 80.040 | 38.680 | 36.637 | 1.00 | 0.00 | C   |
| ATOM | 7261 | CD  | PRO C 855 | 79.512 | 37.972 | 37.897 | 1.00 | 0.00 | C   |
| ATOM | 7262 | N   | LYS C 856 | 81.904 | 39.513 | 40.507 | 1.00 | 0.00 | N   |
| ATOM | 7263 | CA  | LYS C 856 | 82.379 | 40.055 | 41.712 | 1.00 | 0.00 | C   |
| ATOM | 7264 | C   | LYS C 856 | 83.532 | 39.242 | 42.225 | 1.00 | 0.00 | C   |
| ATOM | 7265 | O   | LYS C 856 | 84.334 | 39.769 | 42.985 | 1.00 | 0.00 | O   |
| ATOM | 7266 | CB  | LYS C 856 | 81.299 | 40.080 | 42.791 | 1.00 | 0.00 | C   |
| ATOM | 7267 | CG  | LYS C 856 | 80.084 | 40.932 | 42.422 | 1.00 | 0.00 | C   |
| ATOM | 7268 | CD  | LYS C 856 | 79.171 | 40.305 | 41.365 | 1.00 | 0.00 | C   |
| ATOM | 7269 | CE  | LYS C 856 | 77.865 | 39.760 | 41.949 | 1.00 | 0.00 | C   |
| ATOM | 7270 | NZ  | LYS C 856 | 76.974 | 39.296 | 40.862 | 1.00 | 0.00 | N1+ |
| ATOM | 7271 | N   | ILE C 857 | 83.663 | 37.946 | 41.849 | 1.00 | 0.00 | N   |
| ATOM | 7272 | CA  | ILE C 857 | 84.723 | 37.160 | 42.430 | 1.00 | 0.00 | C   |
| ATOM | 7273 | C   | ILE C 857 | 86.045 | 37.787 | 42.173 | 1.00 | 0.00 | C   |
| ATOM | 7274 | O   | ILE C 857 | 86.884 | 37.853 | 43.071 | 1.00 | 0.00 | O   |
| ATOM | 7275 | CB  | ILE C 857 | 84.836 | 35.746 | 41.943 | 1.00 | 0.00 | C   |
| ATOM | 7276 | CG1 | ILE C 857 | 86.012 | 35.060 | 42.654 | 1.00 | 0.00 | C   |
| ATOM | 7277 | CG2 | ILE C 857 | 85.067 | 35.772 | 40.430 | 1.00 | 0.00 | C   |
| ATOM | 7278 | CD1 | ILE C 857 | 85.925 | 35.055 | 44.175 | 1.00 | 0.00 | C   |
| ATOM | 7279 | N   | ILE C 858 | 86.269 | 38.292 | 40.953 | 1.00 | 0.00 | N   |
| ATOM | 7280 | CA  | ILE C 858 | 87.550 | 38.838 | 40.636 | 1.00 | 0.00 | C   |
| ATOM | 7281 | C   | ILE C 858 | 87.828 | 39.962 | 41.589 | 1.00 | 0.00 | C   |
| ATOM | 7282 | O   | ILE C 858 | 88.923 | 40.072 | 42.139 | 1.00 | 0.00 | O   |
| ATOM | 7283 | CB  | ILE C 858 | 87.581 | 39.317 | 39.200 | 1.00 | 0.00 | C   |
| ATOM | 7284 | CG1 | ILE C 858 | 89.012 | 39.529 | 38.701 | 1.00 | 0.00 | C   |
| ATOM | 7285 | CG2 | ILE C 858 | 86.666 | 40.539 | 39.039 | 1.00 | 0.00 | C   |
| ATOM | 7286 | CD1 | ILE C 858 | 89.701 | 38.233 | 38.283 | 1.00 | 0.00 | C   |
| ATOM | 7287 | N   | MET C 859 | 86.818 | 40.816 | 41.834 | 1.00 | 0.00 | N   |
| ATOM | 7288 | CA  | MET C 859 | 86.950 | 41.951 | 42.697 | 1.00 | 0.00 | C   |
| ATOM | 7289 | C   | MET C 859 | 87.158 | 41.495 | 44.104 | 1.00 | 0.00 | C   |
| ATOM | 7290 | O   | MET C 859 | 87.947 | 42.079 | 44.848 | 1.00 | 0.00 | O   |
| ATOM | 7291 | CB  | MET C 859 | 85.700 | 42.847 | 42.666 | 1.00 | 0.00 | C   |
| ATOM | 7292 | CG  | MET C 859 | 85.862 | 44.179 | 43.404 | 1.00 | 0.00 | C   |
| ATOM | 7293 | SD  | MET C 859 | 85.898 | 44.067 | 45.216 | 1.00 | 0.00 | S   |
| ATOM | 7294 | CE  | MET C 859 | 84.112 | 43.786 | 45.357 | 1.00 | 0.00 | C   |
| ATOM | 7295 | N   | LEU C 860 | 86.451 | 40.421 | 44.493 | 1.00 | 0.00 | N   |
| ATOM | 7296 | CA  | LEU C 860 | 86.432 | 39.954 | 45.846 | 1.00 | 0.00 | C   |
| ATOM | 7297 | C   | LEU C 860 | 87.805 | 39.540 | 46.281 | 1.00 | 0.00 | C   |

|      |      |     |     |   |     |        |        |        |      |      |   |
|------|------|-----|-----|---|-----|--------|--------|--------|------|------|---|
| ATOM | 7298 | O   | LEU | C | 860 | 88.238 | 39.892 | 47.380 | 1.00 | 0.00 | O |
| ATOM | 7299 | CB  | LEU | C | 860 | 85.440 | 38.773 | 45.992 | 1.00 | 0.00 | C |
| ATOM | 7300 | CG  | LEU | C | 860 | 85.144 | 38.256 | 47.415 | 1.00 | 0.00 | C |
| ATOM | 7301 | CD1 | LEU | C | 860 | 84.077 | 37.151 | 47.360 | 1.00 | 0.00 | C |
| ATOM | 7302 | CD2 | LEU | C | 860 | 86.402 | 37.776 | 48.163 | 1.00 | 0.00 | C |
| ATOM | 7303 | N   | GLN | C | 861 | 88.547 | 38.794 | 45.445 | 1.00 | 0.00 | N |
| ATOM | 7304 | CA  | GLN | C | 861 | 89.819 | 38.303 | 45.902 | 1.00 | 0.00 | C |
| ATOM | 7305 | C   | GLN | C | 861 | 90.781 | 39.427 | 46.143 | 1.00 | 0.00 | C |
| ATOM | 7306 | O   | GLN | C | 861 | 91.478 | 39.441 | 47.157 | 1.00 | 0.00 | O |
| ATOM | 7307 | CB  | GLN | C | 861 | 90.495 | 37.322 | 44.933 | 1.00 | 0.00 | C |
| ATOM | 7308 | CG  | GLN | C | 861 | 91.809 | 36.779 | 45.504 | 1.00 | 0.00 | C |
| ATOM | 7309 | CD  | GLN | C | 861 | 92.422 | 35.814 | 44.503 | 1.00 | 0.00 | C |
| ATOM | 7310 | NE2 | GLN | C | 861 | 93.537 | 35.153 | 44.911 | 1.00 | 0.00 | N |
| ATOM | 7311 | OE1 | GLN | C | 861 | 91.928 | 35.653 | 43.389 | 1.00 | 0.00 | O |
| ATOM | 7312 | N   | ARG | C | 862 | 90.844 | 40.405 | 45.224 | 1.00 | 0.00 | N |
| ATOM | 7313 | CA  | ARG | C | 862 | 91.787 | 41.485 | 45.340 | 1.00 | 0.00 | C |
| ATOM | 7314 | C   | ARG | C | 862 | 91.464 | 42.277 | 46.565 | 1.00 | 0.00 | C |
| ATOM | 7315 | O   | ARG | C | 862 | 92.352 | 42.697 | 47.304 | 1.00 | 0.00 | O |
| ATOM | 7316 | CB  | ARG | C | 862 | 91.709 | 42.455 | 44.150 | 1.00 | 0.00 | C |
| ATOM | 7317 | CG  | ARG | C | 862 | 92.693 | 43.622 | 44.223 | 1.00 | 0.00 | C |
| ATOM | 7318 | CD  | ARG | C | 862 | 94.141 | 43.212 | 43.961 | 1.00 | 0.00 | C |
| ATOM | 7319 | NE  | ARG | C | 862 | 94.954 | 44.459 | 43.952 | 1.00 | 0.00 | N |
| ATOM | 7320 | CZ  | ARG | C | 862 | 95.456 | 44.952 | 45.122 | 1.00 | 0.00 | C |
| ATOM | 7321 | NH1 | ARG | C | 862 | 95.252 | 44.274 | 46.288 | 1.00 | 0.00 | N |
| ATOM | 7322 | NH2 | ARG | C | 862 | 96.161 | 46.121 | 45.122 | 1.00 | 0.00 | N |
| ATOM | 7323 | N   | MET | C | 863 | 90.165 | 42.490 | 46.815 | 1.00 | 0.00 | N |
| ATOM | 7324 | CA  | MET | C | 863 | 89.747 | 43.273 | 47.936 | 1.00 | 0.00 | C |
| ATOM | 7325 | C   | MET | C | 863 | 90.202 | 42.578 | 49.174 | 1.00 | 0.00 | C |
| ATOM | 7326 | O   | MET | C | 863 | 90.622 | 43.210 | 50.143 | 1.00 | 0.00 | O |
| ATOM | 7327 | CB  | MET | C | 863 | 88.216 | 43.422 | 47.985 | 1.00 | 0.00 | C |
| ATOM | 7328 | CG  | MET | C | 863 | 87.692 | 44.249 | 49.159 | 1.00 | 0.00 | C |
| ATOM | 7329 | SD  | MET | C | 863 | 87.686 | 43.374 | 50.750 | 1.00 | 0.00 | S |
| ATOM | 7330 | CE  | MET | C | 863 | 86.913 | 44.734 | 51.671 | 1.00 | 0.00 | C |
| ATOM | 7331 | N   | LEU | C | 864 | 90.144 | 41.238 | 49.167 | 1.00 | 0.00 | N |
| ATOM | 7332 | CA  | LEU | C | 864 | 90.508 | 40.488 | 50.326 | 1.00 | 0.00 | C |
| ATOM | 7333 | C   | LEU | C | 864 | 91.948 | 40.747 | 50.635 | 1.00 | 0.00 | C |
| ATOM | 7334 | O   | LEU | C | 864 | 92.310 | 40.997 | 51.782 | 1.00 | 0.00 | O |
| ATOM | 7335 | CB  | LEU | C | 864 | 90.425 | 38.972 | 50.093 | 1.00 | 0.00 | C |
| ATOM | 7336 | CG  | LEU | C | 864 | 90.689 | 38.147 | 51.363 | 1.00 | 0.00 | C |
| ATOM | 7337 | CD1 | LEU | C | 864 | 89.433 | 38.078 | 52.244 | 1.00 | 0.00 | C |
| ATOM | 7338 | CD2 | LEU | C | 864 | 91.314 | 36.784 | 51.037 | 1.00 | 0.00 | C |
| ATOM | 7339 | N   | ILE | C | 865 | 92.816 | 40.697 | 49.611 | 1.00 | 0.00 | N |
| ATOM | 7340 | CA  | ILE | C | 865 | 94.214 | 40.838 | 49.886 | 1.00 | 0.00 | C |
| ATOM | 7341 | C   | ILE | C | 865 | 94.511 | 42.208 | 50.405 | 1.00 | 0.00 | C |

|      |      |     |           |         |        |        |      |      |   |
|------|------|-----|-----------|---------|--------|--------|------|------|---|
| ATOM | 7342 | O   | ILE C 865 | 95.227  | 42.355 | 51.396 | 1.00 | 0.00 | O |
| ATOM | 7343 | CB  | ILE C 865 | 95.094  | 40.565 | 48.698 | 1.00 | 0.00 | C |
| ATOM | 7344 | CG1 | ILE C 865 | 96.556  | 40.438 | 49.151 | 1.00 | 0.00 | C |
| ATOM | 7345 | CG2 | ILE C 865 | 94.862  | 41.647 | 47.632 | 1.00 | 0.00 | C |
| ATOM | 7346 | CD1 | ILE C 865 | 97.475  | 39.852 | 48.080 | 1.00 | 0.00 | C |
| ATOM | 7347 | N   | ASP C 866 | 93.961  | 43.262 | 49.768 | 1.00 | 0.00 | N |
| ATOM | 7348 | CA  | ASP C 866 | 94.317  | 44.577 | 50.208 | 1.00 | 0.00 | C |
| ATOM | 7349 | C   | ASP C 866 | 93.809  | 44.841 | 51.596 | 1.00 | 0.00 | C |
| ATOM | 7350 | O   | ASP C 866 | 94.496  | 45.481 | 52.393 | 1.00 | 0.00 | O |
| ATOM | 7351 | CB  | ASP C 866 | 93.938  | 45.704 | 49.219 | 1.00 | 0.00 | C |
| ATOM | 7352 | CG  | ASP C 866 | 92.449  | 45.764 | 48.913 | 1.00 | 0.00 | C |
| ATOM | 7353 | OD1 | ASP C 866 | 91.618  | 45.516 | 49.823 | 1.00 | 0.00 | O |
| ATOM | 7354 | OD2 | ASP C 866 | 92.125  | 46.064 | 47.736 | 1.00 | 0.00 | O |
| ATOM | 7355 | N   | VAL C 867 | 92.606  | 44.344 | 51.937 | 1.00 | 0.00 | N |
| ATOM | 7356 | CA  | VAL C 867 | 92.071  | 44.609 | 53.243 | 1.00 | 0.00 | C |
| ATOM | 7357 | C   | VAL C 867 | 92.936  | 43.957 | 54.276 | 1.00 | 0.00 | C |
| ATOM | 7358 | O   | VAL C 867 | 93.224  | 44.548 | 55.309 | 1.00 | 0.00 | O |
| ATOM | 7359 | CB  | VAL C 867 | 90.668  | 44.113 | 53.427 | 1.00 | 0.00 | C |
| ATOM | 7360 | CG1 | VAL C 867 | 89.759  | 44.873 | 52.449 | 1.00 | 0.00 | C |
| ATOM | 7361 | CG2 | VAL C 867 | 90.643  | 42.585 | 53.265 | 1.00 | 0.00 | C |
| ATOM | 7362 | N   | PHE C 868 | 93.396  | 42.718 | 54.017 | 1.00 | 0.00 | N |
| ATOM | 7363 | CA  | PHE C 868 | 94.191  | 42.041 | 55.003 | 1.00 | 0.00 | C |
| ATOM | 7364 | C   | PHE C 868 | 95.427  | 42.828 | 55.270 | 1.00 | 0.00 | C |
| ATOM | 7365 | O   | PHE C 868 | 95.828  | 42.985 | 56.422 | 1.00 | 0.00 | O |
| ATOM | 7366 | CB  | PHE C 868 | 94.631  | 40.624 | 54.594 | 1.00 | 0.00 | C |
| ATOM | 7367 | CG  | PHE C 868 | 93.506  | 39.692 | 54.875 | 1.00 | 0.00 | C |
| ATOM | 7368 | CD1 | PHE C 868 | 93.302  | 39.241 | 56.160 | 1.00 | 0.00 | C |
| ATOM | 7369 | CD2 | PHE C 868 | 92.672  | 39.253 | 53.877 | 1.00 | 0.00 | C |
| ATOM | 7370 | CE1 | PHE C 868 | 92.275  | 38.376 | 56.455 | 1.00 | 0.00 | C |
| ATOM | 7371 | CE2 | PHE C 868 | 91.643  | 38.386 | 54.170 | 1.00 | 0.00 | C |
| ATOM | 7372 | CZ  | PHE C 868 | 91.441  | 37.946 | 55.455 | 1.00 | 0.00 | C |
| ATOM | 7373 | N   | PHE C 869 | 96.061  | 43.351 | 54.209 | 1.00 | 0.00 | N |
| ATOM | 7374 | CA  | PHE C 869 | 97.269  | 44.096 | 54.380 | 1.00 | 0.00 | C |
| ATOM | 7375 | C   | PHE C 869 | 96.949  | 45.267 | 55.266 | 1.00 | 0.00 | C |
| ATOM | 7376 | O   | PHE C 869 | 97.651  | 45.536 | 56.238 | 1.00 | 0.00 | O |
| ATOM | 7377 | CB  | PHE C 869 | 97.780  | 44.642 | 53.033 | 1.00 | 0.00 | C |
| ATOM | 7378 | CG  | PHE C 869 | 99.075  | 45.354 | 53.224 | 1.00 | 0.00 | C |
| ATOM | 7379 | CD1 | PHE C 869 | 100.261 | 44.653 | 53.228 | 1.00 | 0.00 | C |
| ATOM | 7380 | CD2 | PHE C 869 | 99.108  | 46.720 | 53.389 | 1.00 | 0.00 | C |
| ATOM | 7381 | CE1 | PHE C 869 | 101.460 | 45.302 | 53.403 | 1.00 | 0.00 | C |
| ATOM | 7382 | CE2 | PHE C 869 | 100.305 | 47.377 | 53.562 | 1.00 | 0.00 | C |
| ATOM | 7383 | CZ  | PHE C 869 | 101.482 | 46.667 | 53.571 | 1.00 | 0.00 | C |
| ATOM | 7384 | N   | PHE C 870 | 95.839  | 45.965 | 54.964 | 1.00 | 0.00 | N |
| ATOM | 7385 | CA  | PHE C 870 | 95.444  | 47.144 | 55.681 | 1.00 | 0.00 | C |

|      |      |     |           |         |        |        |      |      |   |
|------|------|-----|-----------|---------|--------|--------|------|------|---|
| ATOM | 7386 | C   | PHE C 870 | 95.197  | 46.866 | 57.127 | 1.00 | 0.00 | C |
| ATOM | 7387 | O   | PHE C 870 | 95.729  | 47.559 | 57.992 | 1.00 | 0.00 | O |
| ATOM | 7388 | CB  | PHE C 870 | 94.168  | 47.773 | 55.090 | 1.00 | 0.00 | C |
| ATOM | 7389 | CG  | PHE C 870 | 93.585  | 48.726 | 56.075 | 1.00 | 0.00 | C |
| ATOM | 7390 | CD1 | PHE C 870 | 94.372  | 49.652 | 56.707 | 1.00 | 0.00 | C |
| ATOM | 7391 | CD2 | PHE C 870 | 92.237  | 48.727 | 56.346 | 1.00 | 0.00 | C |
| ATOM | 7392 | CE1 | PHE C 870 | 93.850  | 50.555 | 57.605 | 1.00 | 0.00 | C |
| ATOM | 7393 | CE2 | PHE C 870 | 91.699  | 49.624 | 57.244 | 1.00 | 0.00 | C |
| ATOM | 7394 | CZ  | PHE C 870 | 92.505  | 50.538 | 57.874 | 1.00 | 0.00 | C |
| ATOM | 7395 | N   | LEU C 871 | 94.392  | 45.839 | 57.435 | 1.00 | 0.00 | N |
| ATOM | 7396 | CA  | LEU C 871 | 94.082  | 45.592 | 58.811 | 1.00 | 0.00 | C |
| ATOM | 7397 | C   | LEU C 871 | 95.332  | 45.233 | 59.541 | 1.00 | 0.00 | C |
| ATOM | 7398 | O   | LEU C 871 | 95.516  | 45.631 | 60.688 | 1.00 | 0.00 | O |
| ATOM | 7399 | CB  | LEU C 871 | 93.052  | 44.468 | 59.027 | 1.00 | 0.00 | C |
| ATOM | 7400 | CG  | LEU C 871 | 91.603  | 44.878 | 58.704 | 1.00 | 0.00 | C |
| ATOM | 7401 | CD1 | LEU C 871 | 91.112  | 45.961 | 59.679 | 1.00 | 0.00 | C |
| ATOM | 7402 | CD2 | LEU C 871 | 91.422  | 45.288 | 57.237 | 1.00 | 0.00 | C |
| ATOM | 7403 | N   | PHE C 872 | 96.239  | 44.482 | 58.891 | 1.00 | 0.00 | N |
| ATOM | 7404 | CA  | PHE C 872 | 97.417  | 44.047 | 59.580 | 1.00 | 0.00 | C |
| ATOM | 7405 | C   | PHE C 872 | 98.202  | 45.240 | 60.021 | 1.00 | 0.00 | C |
| ATOM | 7406 | O   | PHE C 872 | 98.612  | 45.321 | 61.178 | 1.00 | 0.00 | O |
| ATOM | 7407 | CB  | PHE C 872 | 98.340  | 43.173 | 58.711 | 1.00 | 0.00 | C |
| ATOM | 7408 | CG  | PHE C 872 | 99.438  | 42.692 | 59.595 | 1.00 | 0.00 | C |
| ATOM | 7409 | CD1 | PHE C 872 | 99.236  | 41.618 | 60.430 | 1.00 | 0.00 | C |
| ATOM | 7410 | CD2 | PHE C 872 | 100.671 | 43.310 | 59.591 | 1.00 | 0.00 | C |
| ATOM | 7411 | CE1 | PHE C 872 | 100.242 | 41.165 | 61.252 | 1.00 | 0.00 | C |
| ATOM | 7412 | CE2 | PHE C 872 | 101.677 | 42.859 | 60.410 | 1.00 | 0.00 | C |
| ATOM | 7413 | CZ  | PHE C 872 | 101.466 | 41.788 | 61.241 | 1.00 | 0.00 | C |
| ATOM | 7414 | N   | LEU C 873 | 98.425  | 46.212 | 59.120 | 1.00 | 0.00 | N |
| ATOM | 7415 | CA  | LEU C 873 | 99.210  | 47.354 | 59.485 | 1.00 | 0.00 | C |
| ATOM | 7416 | C   | LEU C 873 | 98.522  | 48.160 | 60.542 | 1.00 | 0.00 | C |
| ATOM | 7417 | O   | LEU C 873 | 99.165  | 48.677 | 61.453 | 1.00 | 0.00 | O |
| ATOM | 7418 | CB  | LEU C 873 | 99.528  | 48.292 | 58.313 | 1.00 | 0.00 | C |
| ATOM | 7419 | CG  | LEU C 873 | 100.619 | 47.741 | 57.376 | 1.00 | 0.00 | C |
| ATOM | 7420 | CD1 | LEU C 873 | 100.196 | 46.428 | 56.704 | 1.00 | 0.00 | C |
| ATOM | 7421 | CD2 | LEU C 873 | 101.065 | 48.814 | 56.378 | 1.00 | 0.00 | C |
| ATOM | 7422 | N   | PHE C 874 | 97.192  | 48.305 | 60.459 | 1.00 | 0.00 | N |
| ATOM | 7423 | CA  | PHE C 874 | 96.557  | 49.154 | 61.421 | 1.00 | 0.00 | C |
| ATOM | 7424 | C   | PHE C 874 | 96.758  | 48.563 | 62.781 | 1.00 | 0.00 | C |
| ATOM | 7425 | O   | PHE C 874 | 97.141  | 49.258 | 63.721 | 1.00 | 0.00 | O |
| ATOM | 7426 | CB  | PHE C 874 | 95.045  | 49.294 | 61.175 | 1.00 | 0.00 | C |
| ATOM | 7427 | CG  | PHE C 874 | 94.578  | 50.487 | 61.935 | 1.00 | 0.00 | C |
| ATOM | 7428 | CD1 | PHE C 874 | 94.699  | 51.742 | 61.379 | 1.00 | 0.00 | C |
| ATOM | 7429 | CD2 | PHE C 874 | 94.017  | 50.369 | 63.185 | 1.00 | 0.00 | C |

|      |      |               |         |        |        |      |      |   |
|------|------|---------------|---------|--------|--------|------|------|---|
| ATOM | 7430 | CE1 PHE C 874 | 94.274  | 52.859 | 62.058 | 1.00 | 0.00 | C |
| ATOM | 7431 | CE2 PHE C 874 | 93.591  | 51.483 | 63.867 | 1.00 | 0.00 | C |
| ATOM | 7432 | CZ PHE C 874  | 93.720  | 52.729 | 63.308 | 1.00 | 0.00 | C |
| ATOM | 7433 | N ALA C 875   | 96.523  | 47.244 | 62.913 | 1.00 | 0.00 | N |
| ATOM | 7434 | CA ALA C 875  | 96.635  | 46.581 | 64.180 | 1.00 | 0.00 | C |
| ATOM | 7435 | C ALA C 875   | 98.048  | 46.658 | 64.664 | 1.00 | 0.00 | C |
| ATOM | 7436 | O ALA C 875   | 98.287  | 46.915 | 65.842 | 1.00 | 0.00 | O |
| ATOM | 7437 | CB ALA C 875  | 96.254  | 45.092 | 64.102 | 1.00 | 0.00 | C |
| ATOM | 7438 | N VAL C 876   | 99.025  | 46.449 | 63.762 | 1.00 | 0.00 | N |
| ATOM | 7439 | CA VAL C 876  | 100.395 | 46.445 | 64.186 | 1.00 | 0.00 | C |
| ATOM | 7440 | C VAL C 876   | 100.754 | 47.796 | 64.699 | 1.00 | 0.00 | C |
| ATOM | 7441 | O VAL C 876   | 101.467 | 47.920 | 65.695 | 1.00 | 0.00 | O |
| ATOM | 7442 | CB VAL C 876  | 101.367 | 46.046 | 63.109 | 1.00 | 0.00 | C |
| ATOM | 7443 | CG1 VAL C 876 | 101.035 | 44.602 | 62.703 | 1.00 | 0.00 | C |
| ATOM | 7444 | CG2 VAL C 876 | 101.314 | 47.054 | 61.950 | 1.00 | 0.00 | C |
| ATOM | 7445 | N TRP C 877   | 100.270 | 48.861 | 64.040 | 1.00 | 0.00 | N |
| ATOM | 7446 | CA TRP C 877  | 100.599 | 50.178 | 64.495 | 1.00 | 0.00 | C |
| ATOM | 7447 | C TRP C 877   | 100.049 | 50.359 | 65.876 | 1.00 | 0.00 | C |
| ATOM | 7448 | O TRP C 877   | 100.740 | 50.850 | 66.766 | 1.00 | 0.00 | O |
| ATOM | 7449 | CB TRP C 877  | 99.999  | 51.287 | 63.615 | 1.00 | 0.00 | C |
| ATOM | 7450 | CG TRP C 877  | 100.242 | 52.683 | 64.138 | 1.00 | 0.00 | C |
| ATOM | 7451 | CD1 TRP C 877 | 101.306 | 53.516 | 63.956 | 1.00 | 0.00 | C |
| ATOM | 7452 | CD2 TRP C 877 | 99.308  | 53.390 | 64.966 | 1.00 | 0.00 | C |
| ATOM | 7453 | CE2 TRP C 877 | 99.867  | 54.636 | 65.249 | 1.00 | 0.00 | C |
| ATOM | 7454 | CE3 TRP C 877 | 98.082  | 53.031 | 65.451 | 1.00 | 0.00 | C |
| ATOM | 7455 | NE1 TRP C 877 | 101.094 | 54.699 | 64.623 | 1.00 | 0.00 | N |
| ATOM | 7456 | CZ2 TRP C 877 | 99.205  | 55.546 | 66.027 | 1.00 | 0.00 | C |
| ATOM | 7457 | CZ3 TRP C 877 | 97.418  | 53.949 | 66.234 | 1.00 | 0.00 | C |
| ATOM | 7458 | CH2 TRP C 877 | 97.969  | 55.179 | 66.516 | 1.00 | 0.00 | C |
| ATOM | 7459 | N MET C 878   | 98.787  | 49.945 | 66.091 | 1.00 | 0.00 | N |
| ATOM | 7460 | CA MET C 878  | 98.142  | 50.161 | 67.352 | 1.00 | 0.00 | C |
| ATOM | 7461 | C MET C 878   | 98.877  | 49.438 | 68.434 | 1.00 | 0.00 | C |
| ATOM | 7462 | O MET C 878   | 99.124  | 49.994 | 69.503 | 1.00 | 0.00 | O |
| ATOM | 7463 | CB MET C 878  | 96.696  | 49.638 | 67.370 | 1.00 | 0.00 | C |
| ATOM | 7464 | CG MET C 878  | 95.778  | 50.340 | 66.367 | 1.00 | 0.00 | C |
| ATOM | 7465 | SD MET C 878  | 94.059  | 49.743 | 66.362 | 1.00 | 0.00 | S |
| ATOM | 7466 | CE MET C 878  | 94.462  | 48.123 | 65.641 | 1.00 | 0.00 | C |
| ATOM | 7467 | N VAL C 879   | 99.266  | 48.176 | 68.179 | 1.00 | 0.00 | N |
| ATOM | 7468 | CA VAL C 879  | 99.926  | 47.399 | 69.188 | 1.00 | 0.00 | C |
| ATOM | 7469 | C VAL C 879   | 101.241 | 48.029 | 69.520 | 1.00 | 0.00 | C |
| ATOM | 7470 | O VAL C 879   | 101.627 | 48.094 | 70.685 | 1.00 | 0.00 | O |
| ATOM | 7471 | CB VAL C 879  | 100.189 | 45.978 | 68.782 | 1.00 | 0.00 | C |
| ATOM | 7472 | CG1 VAL C 879 | 101.159 | 45.961 | 67.590 | 1.00 | 0.00 | C |
| ATOM | 7473 | CG2 VAL C 879 | 100.723 | 45.227 | 70.013 | 1.00 | 0.00 | C |



|      |      |     |     |   |     |         |        |        |      |      |   |
|------|------|-----|-----|---|-----|---------|--------|--------|------|------|---|
| ATOM | 7474 | N   | ALA | C | 880 | 101.959 | 48.521 | 68.495 | 1.00 | 0.00 | N |
| ATOM | 7475 | CA  | ALA | C | 880 | 103.260 | 49.088 | 68.698 | 1.00 | 0.00 | C |
| ATOM | 7476 | C   | ALA | C | 880 | 103.135 | 50.278 | 69.591 | 1.00 | 0.00 | C |
| ATOM | 7477 | O   | ALA | C | 880 | 103.942 | 50.477 | 70.496 | 1.00 | 0.00 | O |
| ATOM | 7478 | CB  | ALA | C | 880 | 103.908 | 49.564 | 67.386 | 1.00 | 0.00 | C |
| ATOM | 7479 | N   | PHE | C | 881 | 102.106 | 51.107 | 69.361 | 1.00 | 0.00 | N |
| ATOM | 7480 | CA  | PHE | C | 881 | 101.930 | 52.290 | 70.146 | 1.00 | 0.00 | C |
| ATOM | 7481 | C   | PHE | C | 881 | 101.681 | 51.873 | 71.558 | 1.00 | 0.00 | C |
| ATOM | 7482 | O   | PHE | C | 881 | 102.250 | 52.434 | 72.494 | 1.00 | 0.00 | O |
| ATOM | 7483 | CB  | PHE | C | 881 | 100.720 | 53.118 | 69.677 | 1.00 | 0.00 | C |
| ATOM | 7484 | CG  | PHE | C | 881 | 100.589 | 54.330 | 70.528 | 1.00 | 0.00 | C |
| ATOM | 7485 | CD1 | PHE | C | 881 | 101.358 | 55.447 | 70.282 | 1.00 | 0.00 | C |
| ATOM | 7486 | CD2 | PHE | C | 881 | 99.687  | 54.367 | 71.567 | 1.00 | 0.00 | C |
| ATOM | 7487 | CE1 | PHE | C | 881 | 101.237 | 56.571 | 71.064 | 1.00 | 0.00 | C |
| ATOM | 7488 | CE2 | PHE | C | 881 | 99.562  | 55.488 | 72.352 | 1.00 | 0.00 | C |
| ATOM | 7489 | CZ  | PHE | C | 881 | 100.336 | 56.594 | 72.104 | 1.00 | 0.00 | C |
| ATOM | 7490 | N   | GLY | C | 882 | 100.830 | 50.846 | 71.742 | 1.00 | 0.00 | N |
| ATOM | 7491 | CA  | GLY | C | 882 | 100.459 | 50.417 | 73.054 | 1.00 | 0.00 | C |
| ATOM | 7492 | C   | GLY | C | 882 | 101.666 | 49.948 | 73.799 | 1.00 | 0.00 | C |
| ATOM | 7493 | O   | GLY | C | 882 | 101.821 | 50.251 | 74.983 | 1.00 | 0.00 | O |
| ATOM | 7494 | N   | VAL | C | 883 | 102.551 | 49.178 | 73.141 | 1.00 | 0.00 | N |
| ATOM | 7495 | CA  | VAL | C | 883 | 103.698 | 48.694 | 73.844 | 1.00 | 0.00 | C |
| ATOM | 7496 | C   | VAL | C | 883 | 104.554 | 49.857 | 74.228 | 1.00 | 0.00 | C |
| ATOM | 7497 | O   | VAL | C | 883 | 105.107 | 49.897 | 75.324 | 1.00 | 0.00 | O |
| ATOM | 7498 | CB  | VAL | C | 883 | 104.523 | 47.694 | 73.081 | 1.00 | 0.00 | C |
| ATOM | 7499 | CG1 | VAL | C | 883 | 103.659 | 46.448 | 72.841 | 1.00 | 0.00 | C |
| ATOM | 7500 | CG2 | VAL | C | 883 | 105.047 | 48.328 | 71.788 | 1.00 | 0.00 | C |
| ATOM | 7501 | N   | ALA | C | 884 | 104.673 | 50.853 | 73.333 | 1.00 | 0.00 | N |
| ATOM | 7502 | CA  | ALA | C | 884 | 105.510 | 51.984 | 73.614 | 1.00 | 0.00 | C |
| ATOM | 7503 | C   | ALA | C | 884 | 104.977 | 52.688 | 74.824 | 1.00 | 0.00 | C |
| ATOM | 7504 | O   | ALA | C | 884 | 105.737 | 53.084 | 75.706 | 1.00 | 0.00 | O |
| ATOM | 7505 | CB  | ALA | C | 884 | 105.532 | 53.004 | 72.462 | 1.00 | 0.00 | C |
| ATOM | 7506 | N   | ARG | C | 885 | 103.645 | 52.852 | 74.905 | 1.00 | 0.00 | N |
| ATOM | 7507 | CA  | ARG | C | 885 | 103.050 | 53.566 | 75.998 | 1.00 | 0.00 | C |
| ATOM | 7508 | C   | ARG | C | 885 | 103.309 | 52.831 | 77.271 | 1.00 | 0.00 | C |
| ATOM | 7509 | O   | ARG | C | 885 | 103.638 | 53.436 | 78.289 | 1.00 | 0.00 | O |
| ATOM | 7510 | CB  | ARG | C | 885 | 101.523 | 53.703 | 75.871 | 1.00 | 0.00 | C |
| ATOM | 7511 | CG  | ARG | C | 885 | 101.080 | 54.612 | 74.724 | 1.00 | 0.00 | C |
| ATOM | 7512 | CD  | ARG | C | 885 | 100.777 | 56.050 | 75.154 | 1.00 | 0.00 | C |
| ATOM | 7513 | NE  | ARG | C | 885 | 102.075 | 56.760 | 75.333 | 1.00 | 0.00 | N |
| ATOM | 7514 | CZ  | ARG | C | 885 | 102.665 | 56.806 | 76.565 | 1.00 | 0.00 | C |
| ATOM | 7515 | NH1 | ARG | C | 885 | 102.067 | 56.200 | 77.631 | 1.00 | 0.00 | N |
| ATOM | 7516 | NH2 | ARG | C | 885 | 103.853 | 57.460 | 76.732 | 1.00 | 0.00 | N |
| ATOM | 7517 | N   | GLN | C | 886 | 103.180 | 51.493 | 77.245 | 1.00 | 0.00 | N |

|      |      |     |     |   |     |         |        |        |      |      |   |
|------|------|-----|-----|---|-----|---------|--------|--------|------|------|---|
| ATOM | 7518 | CA  | GLN | C | 886 | 103.351 | 50.760 | 78.461 | 1.00 | 0.00 | C |
| ATOM | 7519 | C   | GLN | C | 886 | 104.750 | 50.970 | 78.931 | 1.00 | 0.00 | C |
| ATOM | 7520 | O   | GLN | C | 886 | 104.987 | 51.167 | 80.122 | 1.00 | 0.00 | O |
| ATOM | 7521 | CB  | GLN | C | 886 | 103.158 | 49.251 | 78.287 | 1.00 | 0.00 | C |
| ATOM | 7522 | CG  | GLN | C | 886 | 103.212 | 48.490 | 79.610 | 1.00 | 0.00 | C |
| ATOM | 7523 | CD  | GLN | C | 886 | 103.295 | 47.019 | 79.255 | 1.00 | 0.00 | C |
| ATOM | 7524 | NE2 | GLN | C | 886 | 102.971 | 46.129 | 80.231 | 1.00 | 0.00 | N |
| ATOM | 7525 | OE1 | GLN | C | 886 | 103.661 | 46.679 | 78.132 | 1.00 | 0.00 | O |
| ATOM | 7526 | N   | GLY | C | 887 | 105.718 | 50.944 | 77.997 | 1.00 | 0.00 | N |
| ATOM | 7527 | CA  | GLY | C | 887 | 107.091 | 51.092 | 78.376 | 1.00 | 0.00 | C |
| ATOM | 7528 | C   | GLY | C | 887 | 107.282 | 52.443 | 78.987 | 1.00 | 0.00 | C |
| ATOM | 7529 | O   | GLY | C | 887 | 107.979 | 52.589 | 79.991 | 1.00 | 0.00 | O |
| ATOM | 7530 | N   | ILE | C | 888 | 106.669 | 53.474 | 78.383 | 1.00 | 0.00 | N |
| ATOM | 7531 | CA  | ILE | C | 888 | 106.825 | 54.814 | 78.859 | 1.00 | 0.00 | C |
| ATOM | 7532 | C   | ILE | C | 888 | 106.230 | 54.947 | 80.224 | 1.00 | 0.00 | C |
| ATOM | 7533 | O   | ILE | C | 888 | 106.837 | 55.539 | 81.116 | 1.00 | 0.00 | O |
| ATOM | 7534 | CB  | ILE | C | 888 | 106.134 | 55.823 | 77.985 | 1.00 | 0.00 | C |
| ATOM | 7535 | CG1 | ILE | C | 888 | 106.756 | 55.836 | 76.581 | 1.00 | 0.00 | C |
| ATOM | 7536 | CG2 | ILE | C | 888 | 106.189 | 57.182 | 78.701 | 1.00 | 0.00 | C |
| ATOM | 7537 | CD1 | ILE | C | 888 | 108.236 | 56.221 | 76.572 | 1.00 | 0.00 | C |
| ATOM | 7538 | N   | LEU | C | 889 | 105.030 | 54.376 | 80.430 | 1.00 | 0.00 | N |
| ATOM | 7539 | CA  | LEU | C | 889 | 104.329 | 54.587 | 81.659 | 1.00 | 0.00 | C |
| ATOM | 7540 | C   | LEU | C | 889 | 105.121 | 54.070 | 82.816 | 1.00 | 0.00 | C |
| ATOM | 7541 | O   | LEU | C | 889 | 105.344 | 54.787 | 83.788 | 1.00 | 0.00 | O |
| ATOM | 7542 | CB  | LEU | C | 889 | 102.969 | 53.861 | 81.699 | 1.00 | 0.00 | C |
| ATOM | 7543 | CG  | LEU | C | 889 | 101.981 | 54.321 | 80.614 | 1.00 | 0.00 | C |
| ATOM | 7544 | CD1 | LEU | C | 889 | 100.647 | 53.563 | 80.715 | 1.00 | 0.00 | C |
| ATOM | 7545 | CD2 | LEU | C | 889 | 101.804 | 55.847 | 80.625 | 1.00 | 0.00 | C |
| ATOM | 7546 | N   | ARG | C | 890 | 105.590 | 52.811 | 82.740 | 1.00 | 0.00 | N |
| ATOM | 7547 | CA  | ARG | C | 890 | 106.290 | 52.273 | 83.865 | 1.00 | 0.00 | C |
| ATOM | 7548 | C   | ARG | C | 890 | 107.025 | 51.069 | 83.383 | 1.00 | 0.00 | C |
| ATOM | 7549 | O   | ARG | C | 890 | 106.914 | 50.685 | 82.220 | 1.00 | 0.00 | O |
| ATOM | 7550 | CB  | ARG | C | 890 | 105.345 | 51.802 | 84.983 | 1.00 | 0.00 | C |
| ATOM | 7551 | CG  | ARG | C | 890 | 104.385 | 50.703 | 84.519 | 1.00 | 0.00 | C |
| ATOM | 7552 | CD  | ARG | C | 890 | 103.299 | 50.343 | 85.533 | 1.00 | 0.00 | C |
| ATOM | 7553 | NE  | ARG | C | 890 | 102.160 | 51.281 | 85.330 | 1.00 | 0.00 | N |
| ATOM | 7554 | CZ  | ARG | C | 890 | 102.064 | 52.418 | 86.080 | 1.00 | 0.00 | C |
| ATOM | 7555 | NH1 | ARG | C | 890 | 103.006 | 52.690 | 87.032 | 1.00 | 0.00 | N |
| ATOM | 7556 | NH2 | ARG | C | 890 | 101.023 | 53.279 | 85.883 | 1.00 | 0.00 | N |
| ATOM | 7557 | N   | GLN | C | 891 | 107.819 | 50.442 | 84.271 | 1.00 | 0.00 | N |
| ATOM | 7558 | CA  | GLN | C | 891 | 108.502 | 49.258 | 83.855 | 1.00 | 0.00 | C |
| ATOM | 7559 | C   | GLN | C | 891 | 107.467 | 48.198 | 83.692 | 1.00 | 0.00 | C |
| ATOM | 7560 | O   | GLN | C | 891 | 106.440 | 48.204 | 84.372 | 1.00 | 0.00 | O |
| ATOM | 7561 | CB  | GLN | C | 891 | 109.584 | 48.765 | 84.835 | 1.00 | 0.00 | C |

|      |      |     |     |   |     |         |        |        |      |      |   |
|------|------|-----|-----|---|-----|---------|--------|--------|------|------|---|
| ATOM | 7562 | CG  | GLN | C | 891 | 109.069 | 48.439 | 86.237 | 1.00 | 0.00 | C |
| ATOM | 7563 | CD  | GLN | C | 891 | 109.033 | 49.743 | 87.017 | 1.00 | 0.00 | C |
| ATOM | 7564 | NE2 | GLN | C | 891 | 109.881 | 50.720 | 86.595 | 1.00 | 0.00 | N |
| ATOM | 7565 | OE1 | GLN | C | 891 | 108.278 | 49.891 | 87.976 | 1.00 | 0.00 | O |
| ATOM | 7566 | N   | ASN | C | 892 | 107.700 | 47.272 | 82.745 | 1.00 | 0.00 | N |
| ATOM | 7567 | CA  | ASN | C | 892 | 106.746 | 46.237 | 82.496 | 1.00 | 0.00 | C |
| ATOM | 7568 | C   | ASN | C | 892 | 106.770 | 45.361 | 83.688 | 1.00 | 0.00 | C |
| ATOM | 7569 | O   | ASN | C | 892 | 107.807 | 45.182 | 84.326 | 1.00 | 0.00 | O |
| ATOM | 7570 | CB  | ASN | C | 892 | 107.101 | 45.367 | 81.281 | 1.00 | 0.00 | C |
| ATOM | 7571 | CG  | ASN | C | 892 | 107.077 | 46.262 | 80.053 | 1.00 | 0.00 | C |
| ATOM | 7572 | ND2 | ASN | C | 892 | 106.023 | 46.111 | 79.211 | 1.00 | 0.00 | N |
| ATOM | 7573 | OD1 | ASN | C | 892 | 107.976 | 47.076 | 79.844 | 1.00 | 0.00 | O |
| ATOM | 7574 | N   | GLU | C | 893 | 105.614 | 44.784 | 84.043 | 1.00 | 0.00 | N |
| ATOM | 7575 | CA  | GLU | C | 893 | 105.690 | 43.957 | 85.200 | 1.00 | 0.00 | C |
| ATOM | 7576 | C   | GLU | C | 893 | 106.199 | 42.621 | 84.746 | 1.00 | 0.00 | C |
| ATOM | 7577 | O   | GLU | C | 893 | 105.465 | 41.893 | 84.060 | 1.00 | 0.00 | O |
| ATOM | 7578 | CB  | GLU | C | 893 | 104.346 | 43.770 | 85.896 | 1.00 | 0.00 | C |
| ATOM | 7579 | CG  | GLU | C | 893 | 104.409 | 43.108 | 87.265 | 1.00 | 0.00 | C |
| ATOM | 7580 | CD  | GLU | C | 893 | 104.737 | 44.177 | 88.298 | 1.00 | 0.00 | C |
| ATOM | 7581 | OE1 | GLU | C | 893 | 104.805 | 45.373 | 87.914 | 1.00 | 0.00 | O |
| ATOM | 7582 | OE2 | GLU | C | 893 | 104.920 | 43.809 | 89.490 | 1.00 | 0.00 | O |
| ATOM | 7583 | N   | GLN | C | 894 | 107.486 | 42.322 | 85.106 | 1.00 | 0.00 | N |
| ATOM | 7584 | CA  | GLN | C | 894 | 108.205 | 41.113 | 84.785 | 1.00 | 0.00 | C |
| ATOM | 7585 | C   | GLN | C | 894 | 107.576 | 39.982 | 85.520 | 1.00 | 0.00 | C |
| ATOM | 7586 | O   | GLN | C | 894 | 107.340 | 38.913 | 84.956 | 1.00 | 0.00 | O |
| ATOM | 7587 | CB  | GLN | C | 894 | 109.691 | 41.162 | 85.174 | 1.00 | 0.00 | C |
| ATOM | 7588 | CG  | GLN | C | 894 | 109.946 | 41.255 | 86.679 | 1.00 | 0.00 | C |
| ATOM | 7589 | CD  | GLN | C | 894 | 111.452 | 41.292 | 86.890 | 1.00 | 0.00 | C |
| ATOM | 7590 | NE2 | GLN | C | 894 | 112.122 | 42.313 | 86.288 | 1.00 | 0.00 | N |
| ATOM | 7591 | OE1 | GLN | C | 894 | 112.019 | 40.436 | 87.565 | 1.00 | 0.00 | O |
| ATOM | 7592 | N   | ARG | C | 895 | 107.282 | 40.197 | 86.814 | 1.00 | 0.00 | N |
| ATOM | 7593 | CA  | ARG | C | 895 | 106.649 | 39.155 | 87.556 | 1.00 | 0.00 | C |
| ATOM | 7594 | C   | ARG | C | 895 | 105.323 | 38.922 | 86.925 | 1.00 | 0.00 | C |
| ATOM | 7595 | O   | ARG | C | 895 | 104.930 | 37.781 | 86.692 | 1.00 | 0.00 | O |
| ATOM | 7596 | CB  | ARG | C | 895 | 106.381 | 39.515 | 89.024 | 1.00 | 0.00 | C |
| ATOM | 7597 | CG  | ARG | C | 895 | 107.631 | 39.513 | 89.907 | 1.00 | 0.00 | C |
| ATOM | 7598 | CD  | ARG | C | 895 | 108.320 | 38.146 | 89.961 | 1.00 | 0.00 | C |
| ATOM | 7599 | NE  | ARG | C | 895 | 109.234 | 38.146 | 91.136 | 1.00 | 0.00 | N |
| ATOM | 7600 | CZ  | ARG | C | 895 | 110.484 | 38.692 | 91.047 | 1.00 | 0.00 | C |
| ATOM | 7601 | NH1 | ARG | C | 895 | 110.885 | 39.305 | 89.896 | 1.00 | 0.00 | N |
| ATOM | 7602 | NH2 | ARG | C | 895 | 111.329 | 38.626 | 92.116 | 1.00 | 0.00 | N |
| ATOM | 7603 | N   | TRP | C | 896 | 104.599 | 40.013 | 86.611 | 1.00 | 0.00 | N |
| ATOM | 7604 | CA  | TRP | C | 896 | 103.298 | 39.816 | 86.050 | 1.00 | 0.00 | C |
| ATOM | 7605 | C   | TRP | C | 896 | 103.323 | 40.278 | 84.633 | 1.00 | 0.00 | C |

|      |      |     |     |   |     |         |        |        |      |      |   |
|------|------|-----|-----|---|-----|---------|--------|--------|------|------|---|
| ATOM | 7606 | O   | TRP | C | 896 | 102.878 | 41.384 | 84.317 | 1.00 | 0.00 | O |
| ATOM | 7607 | CB  | TRP | C | 896 | 102.223 | 40.614 | 86.804 | 1.00 | 0.00 | C |
| ATOM | 7608 | CG  | TRP | C | 896 | 101.956 | 40.125 | 88.212 | 1.00 | 0.00 | C |
| ATOM | 7609 | CD1 | TRP | C | 896 | 100.982 | 39.282 | 88.660 | 1.00 | 0.00 | C |
| ATOM | 7610 | CD2 | TRP | C | 896 | 102.733 | 40.490 | 89.365 | 1.00 | 0.00 | C |
| ATOM | 7611 | CE2 | TRP | C | 896 | 102.172 | 39.841 | 90.465 | 1.00 | 0.00 | C |
| ATOM | 7612 | CE3 | TRP | C | 896 | 103.824 | 41.295 | 89.500 | 1.00 | 0.00 | C |
| ATOM | 7613 | NE1 | TRP | C | 896 | 101.100 | 39.103 | 90.018 | 1.00 | 0.00 | N |
| ATOM | 7614 | CZ2 | TRP | C | 896 | 102.702 | 39.989 | 91.717 | 1.00 | 0.00 | C |
| ATOM | 7615 | CZ3 | TRP | C | 896 | 104.352 | 41.446 | 90.764 | 1.00 | 0.00 | C |
| ATOM | 7616 | CH2 | TRP | C | 896 | 103.800 | 40.808 | 91.854 | 1.00 | 0.00 | C |
| ATOM | 7617 | N   | ARG | C | 897 | 103.857 | 39.432 | 83.733 | 1.00 | 0.00 | N |
| ATOM | 7618 | CA  | ARG | C | 897 | 103.883 | 39.773 | 82.344 | 1.00 | 0.00 | C |
| ATOM | 7619 | C   | ARG | C | 897 | 102.484 | 39.739 | 81.832 | 1.00 | 0.00 | C |
| ATOM | 7620 | O   | ARG | C | 897 | 102.061 | 40.595 | 81.059 | 1.00 | 0.00 | O |
| ATOM | 7621 | CB  | ARG | C | 897 | 104.680 | 38.783 | 81.487 | 1.00 | 0.00 | C |
| ATOM | 7622 | CG  | ARG | C | 897 | 104.795 | 39.269 | 80.043 | 1.00 | 0.00 | C |
| ATOM | 7623 | CD  | ARG | C | 897 | 105.305 | 38.229 | 79.052 | 1.00 | 0.00 | C |
| ATOM | 7624 | NE  | ARG | C | 897 | 105.540 | 38.947 | 77.769 | 1.00 | 0.00 | N |
| ATOM | 7625 | CZ  | ARG | C | 897 | 105.302 | 38.336 | 76.570 | 1.00 | 0.00 | C |
| ATOM | 7626 | NH1 | ARG | C | 897 | 104.796 | 37.067 | 76.535 | 1.00 | 0.00 | N |
| ATOM | 7627 | NH2 | ARG | C | 897 | 105.566 | 39.000 | 75.407 | 1.00 | 0.00 | N |
| ATOM | 7628 | N   | TRP | C | 898 | 101.728 | 38.724 | 82.280 | 1.00 | 0.00 | N |
| ATOM | 7629 | CA  | TRP | C | 898 | 100.403 | 38.507 | 81.785 | 1.00 | 0.00 | C |
| ATOM | 7630 | C   | TRP | C | 898 | 99.530  | 39.669 | 82.109 | 1.00 | 0.00 | C |
| ATOM | 7631 | O   | TRP | C | 898 | 98.868  | 40.217 | 81.226 | 1.00 | 0.00 | O |
| ATOM | 7632 | CB  | TRP | C | 898 | 99.717  | 37.284 | 82.416 | 1.00 | 0.00 | C |
| ATOM | 7633 | CG  | TRP | C | 898 | 100.364 | 35.963 | 82.093 | 1.00 | 0.00 | C |
| ATOM | 7634 | CD1 | TRP | C | 898 | 101.093 | 35.135 | 82.895 | 1.00 | 0.00 | C |
| ATOM | 7635 | CD2 | TRP | C | 898 | 100.316 | 35.341 | 80.800 | 1.00 | 0.00 | C |
| ATOM | 7636 | CE2 | TRP | C | 898 | 101.031 | 34.148 | 80.892 | 1.00 | 0.00 | C |
| ATOM | 7637 | CE3 | TRP | C | 898 | 99.734  | 35.737 | 79.631 | 1.00 | 0.00 | C |
| ATOM | 7638 | NE1 | TRP | C | 898 | 101.499 | 34.033 | 82.186 | 1.00 | 0.00 | N |
| ATOM | 7639 | CZ2 | TRP | C | 898 | 101.170 | 33.326 | 79.813 | 1.00 | 0.00 | C |
| ATOM | 7640 | CZ3 | TRP | C | 898 | 99.876  | 34.903 | 78.544 | 1.00 | 0.00 | C |
| ATOM | 7641 | CH2 | TRP | C | 898 | 100.580 | 33.721 | 78.634 | 1.00 | 0.00 | C |
| ATOM | 7642 | N   | ILE | C | 899 | 99.505  | 40.090 | 83.385 | 1.00 | 0.00 | N |
| ATOM | 7643 | CA  | ILE | C | 899 | 98.573  | 41.120 | 83.732 | 1.00 | 0.00 | C |
| ATOM | 7644 | C   | ILE | C | 899 | 98.931  | 42.387 | 83.030 | 1.00 | 0.00 | C |
| ATOM | 7645 | O   | ILE | C | 899 | 98.065  | 43.047 | 82.459 | 1.00 | 0.00 | O |
| ATOM | 7646 | CB  | ILE | C | 899 | 98.470  | 41.379 | 85.211 | 1.00 | 0.00 | C |
| ATOM | 7647 | CG1 | ILE | C | 899 | 97.284  | 42.308 | 85.516 | 1.00 | 0.00 | C |
| ATOM | 7648 | CG2 | ILE | C | 899 | 99.816  | 41.907 | 85.712 | 1.00 | 0.00 | C |
| ATOM | 7649 | CD1 | ILE | C | 899 | 96.955  | 42.408 | 87.005 | 1.00 | 0.00 | C |

|      |      |     |     |   |     |         |        |        |      |      |   |
|------|------|-----|-----|---|-----|---------|--------|--------|------|------|---|
| ATOM | 7650 | N   | PHE | C | 900 | 100.225 | 42.756 | 83.035 | 1.00 | 0.00 | N |
| ATOM | 7651 | CA  | PHE | C | 900 | 100.614 | 43.982 | 82.407 | 1.00 | 0.00 | C |
| ATOM | 7652 | C   | PHE | C | 900 | 100.356 | 43.922 | 80.941 | 1.00 | 0.00 | C |
| ATOM | 7653 | O   | PHE | C | 900 | 99.844  | 44.882 | 80.374 | 1.00 | 0.00 | O |
| ATOM | 7654 | CB  | PHE | C | 900 | 102.084 | 44.329 | 82.670 | 1.00 | 0.00 | C |
| ATOM | 7655 | CG  | PHE | C | 900 | 102.098 | 44.894 | 84.047 | 1.00 | 0.00 | C |
| ATOM | 7656 | CD1 | PHE | C | 900 | 101.579 | 44.174 | 85.095 | 1.00 | 0.00 | C |
| ATOM | 7657 | CD2 | PHE | C | 900 | 102.549 | 46.173 | 84.276 | 1.00 | 0.00 | C |
| ATOM | 7658 | CE1 | PHE | C | 900 | 101.583 | 44.686 | 86.371 | 1.00 | 0.00 | C |
| ATOM | 7659 | CE2 | PHE | C | 900 | 102.554 | 46.692 | 85.550 | 1.00 | 0.00 | C |
| ATOM | 7660 | CZ  | PHE | C | 900 | 102.079 | 45.947 | 86.602 | 1.00 | 0.00 | C |
| ATOM | 7661 | N   | ARG | C | 901 | 100.694 | 42.794 | 80.285 | 1.00 | 0.00 | N |
| ATOM | 7662 | CA  | ARG | C | 901 | 100.494 | 42.729 | 78.862 | 1.00 | 0.00 | C |
| ATOM | 7663 | C   | ARG | C | 901 | 99.036  | 42.867 | 78.570 | 1.00 | 0.00 | C |
| ATOM | 7664 | O   | ARG | C | 901 | 98.644  | 43.611 | 77.674 | 1.00 | 0.00 | O |
| ATOM | 7665 | CB  | ARG | C | 901 | 100.956 | 41.409 | 78.225 | 1.00 | 0.00 | C |
| ATOM | 7666 | CG  | ARG | C | 901 | 100.851 | 41.433 | 76.695 | 1.00 | 0.00 | C |
| ATOM | 7667 | CD  | ARG | C | 901 | 101.302 | 40.143 | 76.010 | 1.00 | 0.00 | C |
| ATOM | 7668 | NE  | ARG | C | 901 | 100.094 | 39.296 | 75.802 | 1.00 | 0.00 | N |
| ATOM | 7669 | CZ  | ARG | C | 901 | 99.718  | 38.397 | 76.757 | 1.00 | 0.00 | C |
| ATOM | 7670 | NH1 | ARG | C | 901 | 100.458 | 38.262 | 77.897 | 1.00 | 0.00 | N |
| ATOM | 7671 | NH2 | ARG | C | 901 | 98.601  | 37.633 | 76.572 | 1.00 | 0.00 | N |
| ATOM | 7672 | N   | SER | C | 902 | 98.188  | 42.156 | 79.338 | 1.00 | 0.00 | N |
| ATOM | 7673 | CA  | SER | C | 902 | 96.777  | 42.199 | 79.079 | 1.00 | 0.00 | C |
| ATOM | 7674 | C   | SER | C | 902 | 96.310  | 43.599 | 79.281 | 1.00 | 0.00 | C |
| ATOM | 7675 | O   | SER | C | 902 | 95.503  | 44.115 | 78.510 | 1.00 | 0.00 | O |
| ATOM | 7676 | CB  | SER | C | 902 | 95.974  | 41.291 | 80.032 | 1.00 | 0.00 | C |
| ATOM | 7677 | OG  | SER | C | 902 | 96.094  | 41.752 | 81.372 | 1.00 | 0.00 | O |
| ATOM | 7678 | N   | VAL | C | 903 | 96.836  | 44.261 | 80.323 | 1.00 | 0.00 | N |
| ATOM | 7679 | CA  | VAL | C | 903 | 96.435  | 45.602 | 80.623 | 1.00 | 0.00 | C |
| ATOM | 7680 | C   | VAL | C | 903 | 96.828  | 46.466 | 79.473 | 1.00 | 0.00 | C |
| ATOM | 7681 | O   | VAL | C | 903 | 96.114  | 47.403 | 79.122 | 1.00 | 0.00 | O |
| ATOM | 7682 | CB  | VAL | C | 903 | 97.097  | 46.154 | 81.851 | 1.00 | 0.00 | C |
| ATOM | 7683 | CG1 | VAL | C | 903 | 96.748  | 47.647 | 81.968 | 1.00 | 0.00 | C |
| ATOM | 7684 | CG2 | VAL | C | 903 | 96.648  | 45.320 | 83.061 | 1.00 | 0.00 | C |
| ATOM | 7685 | N   | ILE | C | 904 | 97.990  | 46.174 | 78.858 | 1.00 | 0.00 | N |
| ATOM | 7686 | CA  | ILE | C | 904 | 98.460  | 46.994 | 77.784 | 1.00 | 0.00 | C |
| ATOM | 7687 | C   | ILE | C | 904 | 97.480  | 46.895 | 76.662 | 1.00 | 0.00 | C |
| ATOM | 7688 | O   | ILE | C | 904 | 97.123  | 47.891 | 76.037 | 1.00 | 0.00 | O |
| ATOM | 7689 | CB  | ILE | C | 904 | 99.669  | 46.442 | 77.090 | 1.00 | 0.00 | C |
| ATOM | 7690 | CG1 | ILE | C | 904 | 100.761 | 45.953 | 78.034 | 1.00 | 0.00 | C |
| ATOM | 7691 | CG2 | ILE | C | 904 | 100.178 | 47.546 | 76.152 | 1.00 | 0.00 | C |
| ATOM | 7692 | CD1 | ILE | C | 904 | 101.693 | 44.975 | 77.319 | 1.00 | 0.00 | C |
| ATOM | 7693 | N   | TYR | C | 905 | 97.095  | 45.652 | 76.314 | 1.00 | 0.00 | N |

|      |      |     |     |   |     |         |        |        |      |      |   |
|------|------|-----|-----|---|-----|---------|--------|--------|------|------|---|
| ATOM | 7694 | CA  | TYR | C | 905 | 96.256  | 45.453 | 75.169 | 1.00 | 0.00 | C |
| ATOM | 7695 | C   | TYR | C | 905 | 94.818  | 45.855 | 75.327 | 1.00 | 0.00 | C |
| ATOM | 7696 | O   | TYR | C | 905 | 94.325  | 46.699 | 74.580 | 1.00 | 0.00 | O |
| ATOM | 7697 | CB  | TYR | C | 905 | 96.257  | 43.992 | 74.693 | 1.00 | 0.00 | C |
| ATOM | 7698 | CG  | TYR | C | 905 | 97.591  | 43.727 | 74.085 | 1.00 | 0.00 | C |
| ATOM | 7699 | CD1 | TYR | C | 905 | 98.697  | 43.502 | 74.870 | 1.00 | 0.00 | C |
| ATOM | 7700 | CD2 | TYR | C | 905 | 97.725  | 43.704 | 72.715 | 1.00 | 0.00 | C |
| ATOM | 7701 | CE1 | TYR | C | 905 | 99.923  | 43.264 | 74.291 | 1.00 | 0.00 | C |
| ATOM | 7702 | CE2 | TYR | C | 905 | 98.946  | 43.464 | 72.135 | 1.00 | 0.00 | C |
| ATOM | 7703 | CZ  | TYR | C | 905 | 100.048 | 43.243 | 72.924 | 1.00 | 0.00 | C |
| ATOM | 7704 | OH  | TYR | C | 905 | 101.304 | 43.000 | 72.329 | 1.00 | 0.00 | O |
| ATOM | 7705 | N   | GLU | C | 906 | 94.110  | 45.305 | 76.329 | 1.00 | 0.00 | N |
| ATOM | 7706 | CA  | GLU | C | 906 | 92.679  | 45.453 | 76.301 | 1.00 | 0.00 | C |
| ATOM | 7707 | C   | GLU | C | 906 | 92.195  | 46.851 | 76.516 | 1.00 | 0.00 | C |
| ATOM | 7708 | O   | GLU | C | 906 | 91.385  | 47.331 | 75.727 | 1.00 | 0.00 | O |
| ATOM | 7709 | CB  | GLU | C | 906 | 91.944  | 44.525 | 77.285 | 1.00 | 0.00 | C |
| ATOM | 7710 | CG  | GLU | C | 906 | 90.428  | 44.553 | 77.089 | 1.00 | 0.00 | C |
| ATOM | 7711 | CD  | GLU | C | 906 | 90.143  | 43.986 | 75.705 | 1.00 | 0.00 | C |
| ATOM | 7712 | OE1 | GLU | C | 906 | 90.726  | 42.919 | 75.374 | 1.00 | 0.00 | O |
| ATOM | 7713 | OE2 | GLU | C | 906 | 89.347  | 44.616 | 74.960 | 1.00 | 0.00 | O |
| ATOM | 7714 | N   | PRO | C | 907 | 92.629  | 47.548 | 77.524 | 1.00 | 0.00 | N |
| ATOM | 7715 | CA  | PRO | C | 907 | 92.094  | 48.867 | 77.702 | 1.00 | 0.00 | C |
| ATOM | 7716 | C   | PRO | C | 907 | 92.554  | 49.786 | 76.623 | 1.00 | 0.00 | C |
| ATOM | 7717 | O   | PRO | C | 907 | 91.839  | 50.733 | 76.302 | 1.00 | 0.00 | O |
| ATOM | 7718 | CB  | PRO | C | 907 | 92.495  | 49.294 | 79.111 | 1.00 | 0.00 | C |
| ATOM | 7719 | CG  | PRO | C | 907 | 92.591  | 47.960 | 79.872 | 1.00 | 0.00 | C |
| ATOM | 7720 | CD  | PRO | C | 907 | 92.976  | 46.932 | 78.798 | 1.00 | 0.00 | C |
| ATOM | 7721 | N   | TYR | C | 908 | 93.756  | 49.539 | 76.079 | 1.00 | 0.00 | N |
| ATOM | 7722 | CA  | TYR | C | 908 | 94.307  | 50.382 | 75.062 | 1.00 | 0.00 | C |
| ATOM | 7723 | C   | TYR | C | 908 | 93.547  | 50.271 | 73.787 | 1.00 | 0.00 | C |
| ATOM | 7724 | O   | TYR | C | 908 | 93.357  | 51.268 | 73.092 | 1.00 | 0.00 | O |
| ATOM | 7725 | CB  | TYR | C | 908 | 95.818  | 50.193 | 74.857 | 1.00 | 0.00 | C |
| ATOM | 7726 | CG  | TYR | C | 908 | 96.431  | 50.931 | 76.005 | 1.00 | 0.00 | C |
| ATOM | 7727 | CD1 | TYR | C | 908 | 96.743  | 52.266 | 75.873 | 1.00 | 0.00 | C |
| ATOM | 7728 | CD2 | TYR | C | 908 | 96.671  | 50.318 | 77.212 | 1.00 | 0.00 | C |
| ATOM | 7729 | CE1 | TYR | C | 908 | 97.299  | 52.968 | 76.915 | 1.00 | 0.00 | C |
| ATOM | 7730 | CE2 | TYR | C | 908 | 97.228  | 51.010 | 78.261 | 1.00 | 0.00 | C |
| ATOM | 7731 | CZ  | TYR | C | 908 | 97.544  | 52.338 | 78.112 | 1.00 | 0.00 | C |
| ATOM | 7732 | OH  | TYR | C | 908 | 98.116  | 53.057 | 79.183 | 1.00 | 0.00 | O |
| ATOM | 7733 | N   | LEU | C | 909 | 93.114  | 49.061 | 73.394 | 1.00 | 0.00 | N |
| ATOM | 7734 | CA  | LEU | C | 909 | 92.314  | 49.053 | 72.209 | 1.00 | 0.00 | C |
| ATOM | 7735 | C   | LEU | C | 909 | 91.054  | 49.804 | 72.514 | 1.00 | 0.00 | C |
| ATOM | 7736 | O   | LEU | C | 909 | 90.573  | 50.585 | 71.695 | 1.00 | 0.00 | O |
| ATOM | 7737 | CB  | LEU | C | 909 | 91.927  | 47.648 | 71.708 | 1.00 | 0.00 | C |

|      |      |     |     |   |     |        |        |        |      |      |   |
|------|------|-----|-----|---|-----|--------|--------|--------|------|------|---|
| ATOM | 7738 | CG  | LEU | C | 909 | 93.055 | 46.909 | 70.960 | 1.00 | 0.00 | C |
| ATOM | 7739 | CD1 | LEU | C | 909 | 93.414 | 47.644 | 69.658 | 1.00 | 0.00 | C |
| ATOM | 7740 | CD2 | LEU | C | 909 | 94.280 | 46.649 | 71.844 | 1.00 | 0.00 | C |
| ATOM | 7741 | N   | ALA | C | 910 | 90.496 | 49.580 | 73.720 | 1.00 | 0.00 | N |
| ATOM | 7742 | CA  | ALA | C | 910 | 89.234 | 50.150 | 74.101 | 1.00 | 0.00 | C |
| ATOM | 7743 | C   | ALA | C | 910 | 89.245 | 51.651 | 74.205 | 1.00 | 0.00 | C |
| ATOM | 7744 | O   | ALA | C | 910 | 88.392 | 52.308 | 73.612 | 1.00 | 0.00 | O |
| ATOM | 7745 | CB  | ALA | C | 910 | 88.738 | 49.602 | 75.451 | 1.00 | 0.00 | C |
| ATOM | 7746 | N   | MET | C | 911 | 90.211 | 52.258 | 74.930 | 1.00 | 0.00 | N |
| ATOM | 7747 | CA  | MET | C | 911 | 90.112 | 53.686 | 75.100 | 1.00 | 0.00 | C |
| ATOM | 7748 | C   | MET | C | 911 | 91.450 | 54.207 | 75.483 | 1.00 | 0.00 | C |
| ATOM | 7749 | O   | MET | C | 911 | 92.478 | 53.592 | 75.219 | 1.00 | 0.00 | O |
| ATOM | 7750 | CB  | MET | C | 911 | 89.189 | 54.142 | 76.245 | 1.00 | 0.00 | C |
| ATOM | 7751 | CG  | MET | C | 911 | 87.707 | 53.792 | 76.102 | 1.00 | 0.00 | C |
| ATOM | 7752 | SD  | MET | C | 911 | 87.273 | 52.080 | 76.523 | 1.00 | 0.00 | S |
| ATOM | 7753 | CE  | MET | C | 911 | 85.487 | 52.396 | 76.603 | 1.00 | 0.00 | C |
| ATOM | 7754 | N   | PHE | C | 912 | 91.473 | 55.415 | 76.083 | 1.00 | 0.00 | N |
| ATOM | 7755 | CA  | PHE | C | 912 | 92.746 | 55.901 | 76.505 | 1.00 | 0.00 | C |
| ATOM | 7756 | C   | PHE | C | 912 | 92.569 | 56.547 | 77.838 | 1.00 | 0.00 | C |
| ATOM | 7757 | O   | PHE | C | 912 | 91.756 | 57.459 | 77.985 | 1.00 | 0.00 | O |
| ATOM | 7758 | CB  | PHE | C | 912 | 93.328 | 56.913 | 75.509 | 1.00 | 0.00 | C |
| ATOM | 7759 | CG  | PHE | C | 912 | 93.389 | 56.159 | 74.225 | 1.00 | 0.00 | C |
| ATOM | 7760 | CD1 | PHE | C | 912 | 92.290 | 56.117 | 73.395 | 1.00 | 0.00 | C |
| ATOM | 7761 | CD2 | PHE | C | 912 | 94.522 | 55.472 | 73.857 | 1.00 | 0.00 | C |
| ATOM | 7762 | CE1 | PHE | C | 912 | 92.323 | 55.417 | 72.215 | 1.00 | 0.00 | C |
| ATOM | 7763 | CE2 | PHE | C | 912 | 94.562 | 54.771 | 72.676 | 1.00 | 0.00 | C |
| ATOM | 7764 | CZ  | PHE | C | 912 | 93.463 | 54.744 | 71.854 | 1.00 | 0.00 | C |
| ATOM | 7765 | N   | GLY | C | 913 | 93.316 | 56.088 | 78.867 | 1.00 | 0.00 | N |
| ATOM | 7766 | CA  | GLY | C | 913 | 94.208 | 54.960 | 78.801 | 1.00 | 0.00 | C |
| ATOM | 7767 | C   | GLY | C | 913 | 93.785 | 53.969 | 79.851 | 1.00 | 0.00 | C |
| ATOM | 7768 | O   | GLY | C | 913 | 92.601 | 53.701 | 80.046 | 1.00 | 0.00 | O |
| ATOM | 7769 | N   | GLN | C | 914 | 94.778 | 53.390 | 80.562 | 1.00 | 0.00 | N |
| ATOM | 7770 | CA  | GLN | C | 914 | 94.538 | 52.450 | 81.625 | 1.00 | 0.00 | C |
| ATOM | 7771 | C   | GLN | C | 914 | 94.202 | 53.235 | 82.850 | 1.00 | 0.00 | C |
| ATOM | 7772 | O   | GLN | C | 914 | 94.351 | 54.457 | 82.850 | 1.00 | 0.00 | O |
| ATOM | 7773 | CB  | GLN | C | 914 | 95.762 | 51.569 | 81.939 | 1.00 | 0.00 | C |
| ATOM | 7774 | CG  | GLN | C | 914 | 95.587 | 50.646 | 83.145 | 1.00 | 0.00 | C |
| ATOM | 7775 | CD  | GLN | C | 914 | 94.438 | 49.694 | 82.867 | 1.00 | 0.00 | C |
| ATOM | 7776 | NE2 | GLN | C | 914 | 94.030 | 48.920 | 83.908 | 1.00 | 0.00 | N |
| ATOM | 7777 | OE1 | GLN | C | 914 | 93.913 | 49.641 | 81.755 | 1.00 | 0.00 | O |
| ATOM | 7778 | N   | VAL | C | 915 | 93.656 | 52.563 | 83.892 | 1.00 | 0.00 | N |
| ATOM | 7779 | CA  | VAL | C | 915 | 93.386 | 53.211 | 85.146 | 1.00 | 0.00 | C |
| ATOM | 7780 | C   | VAL | C | 915 | 94.046 | 52.447 | 86.263 | 1.00 | 0.00 | C |
| ATOM | 7781 | O   | VAL | C | 915 | 93.510 | 51.474 | 86.786 | 1.00 | 0.00 | O |

|      |      |               |         |        |        |      |      |   |
|------|------|---------------|---------|--------|--------|------|------|---|
| ATOM | 7782 | CB VAL C 915  | 91.917  | 53.326 | 85.448 | 1.00 | 0.00 | C |
| ATOM | 7783 | CG1 VAL C 915 | 91.303  | 54.374 | 84.506 | 1.00 | 0.00 | C |
| ATOM | 7784 | CG2 VAL C 915 | 91.272  | 51.943 | 85.275 | 1.00 | 0.00 | C |
| ATOM | 7785 | N PRO C 916   | 96.162  | 52.849 | 85.483 | 1.00 | 0.00 | N |
| ATOM | 7786 | CA PRO C 916  | 96.772  | 52.160 | 86.589 | 1.00 | 0.00 | C |
| ATOM | 7787 | C PRO C 916   | 96.107  | 52.604 | 87.849 | 1.00 | 0.00 | C |
| ATOM | 7788 | O PRO C 916   | 95.539  | 53.694 | 87.871 | 1.00 | 0.00 | O |
| ATOM | 7789 | CB PRO C 916  | 98.258  | 52.495 | 86.524 | 1.00 | 0.00 | C |
| ATOM | 7790 | CG PRO C 916  | 98.505  | 52.755 | 85.027 | 1.00 | 0.00 | C |
| ATOM | 7791 | CD PRO C 916  | 97.151  | 53.280 | 84.508 | 1.00 | 0.00 | C |
| ATOM | 7792 | N SER C 917   | 96.158  | 51.782 | 88.908 | 1.00 | 0.00 | N |
| ATOM | 7793 | CA SER C 917  | 95.541  | 52.211 | 90.124 | 1.00 | 0.00 | C |
| ATOM | 7794 | C SER C 917   | 96.332  | 53.383 | 90.595 | 1.00 | 0.00 | C |
| ATOM | 7795 | O SER C 917   | 97.451  | 53.613 | 90.138 | 1.00 | 0.00 | O |
| ATOM | 7796 | CB SER C 917  | 95.552  | 51.151 | 91.238 | 1.00 | 0.00 | C |
| ATOM | 7797 | OG SER C 917  | 94.756  | 50.041 | 90.853 | 1.00 | 0.00 | O |
| ATOM | 7798 | N ASP C 918   | 95.768  | 54.150 | 91.544 | 1.00 | 0.00 | N |
| ATOM | 7799 | CA ASP C 918  | 96.404  | 55.361 | 91.979 | 1.00 | 0.00 | C |
| ATOM | 7800 | C ASP C 918   | 97.784  | 55.059 | 92.457 | 1.00 | 0.00 | C |
| ATOM | 7801 | O ASP C 918   | 98.071  | 53.981 | 92.973 | 1.00 | 0.00 | O |
| ATOM | 7802 | CB ASP C 918  | 95.652  | 56.090 | 93.105 | 1.00 | 0.00 | C |
| ATOM | 7803 | CG ASP C 918  | 94.403  | 56.719 | 92.506 | 1.00 | 0.00 | C |
| ATOM | 7804 | OD1 ASP C 918 | 94.290  | 56.740 | 91.253 | 1.00 | 0.00 | O |
| ATOM | 7805 | OD2 ASP C 918 | 93.543  | 57.191 | 93.294 | 1.00 | 0.00 | O |
| ATOM | 7806 | N VAL C 919   | 98.685  | 56.046 | 92.274 | 1.00 | 0.00 | N |
| ATOM | 7807 | CA VAL C 919  | 100.064 | 55.871 | 92.609 | 1.00 | 0.00 | C |
| ATOM | 7808 | C VAL C 919   | 100.235 | 56.062 | 94.075 | 1.00 | 0.00 | C |
| ATOM | 7809 | O VAL C 919   | 100.018 | 57.143 | 94.621 | 1.00 | 0.00 | O |
| ATOM | 7810 | CB VAL C 919  | 100.966 | 56.821 | 91.871 | 1.00 | 0.00 | C |
| ATOM | 7811 | CG1 VAL C 919 | 100.532 | 58.266 | 92.172 | 1.00 | 0.00 | C |
| ATOM | 7812 | CG2 VAL C 919 | 102.418 | 56.512 | 92.262 | 1.00 | 0.00 | C |
| ATOM | 7813 | N ASP C 920   | 100.633 | 54.973 | 94.754 | 1.00 | 0.00 | N |
| ATOM | 7814 | CA ASP C 920  | 100.865 | 55.052 | 96.161 | 1.00 | 0.00 | C |
| ATOM | 7815 | C ASP C 920   | 102.290 | 55.436 | 96.315 | 1.00 | 0.00 | C |
| ATOM | 7816 | O ASP C 920   | 103.187 | 54.602 | 96.202 | 1.00 | 0.00 | O |
| ATOM | 7817 | CB ASP C 920  | 100.693 | 53.713 | 96.895 | 1.00 | 0.00 | C |
| ATOM | 7818 | CG ASP C 920  | 100.971 | 53.960 | 98.370 | 1.00 | 0.00 | C |
| ATOM | 7819 | OD1 ASP C 920 | 100.996 | 55.154 | 98.773 | 1.00 | 0.00 | O |
| ATOM | 7820 | OD2 ASP C 920 | 101.169 | 52.963 | 99.111 | 1.00 | 0.00 | O |
| ATOM | 7821 | N GLY C 921   | 102.541 | 56.726 | 96.568 | 1.00 | 0.00 | N |
| ATOM | 7822 | CA GLY C 921  | 103.901 | 57.093 | 96.751 | 1.00 | 0.00 | C |
| ATOM | 7823 | C GLY C 921   | 104.255 | 56.504 | 98.068 | 1.00 | 0.00 | C |
| ATOM | 7824 | O GLY C 921   | 103.392 | 56.009 | 98.790 | 1.00 | 0.00 | O |
| ATOM | 7825 | N THR C 922   | 105.547 | 56.499 | 98.407 | 1.00 | 0.00 | N |



|      |      |     |     |   |     |         |        |         |      |      |   |
|------|------|-----|-----|---|-----|---------|--------|---------|------|------|---|
| ATOM | 7826 | CA  | THR | C | 922 | 105.888 | 56.015 | 99.703  | 1.00 | 0.00 | C |
| ATOM | 7827 | C   | THR | C | 922 | 105.294 | 57.013 | 100.637 | 1.00 | 0.00 | C |
| ATOM | 7828 | O   | THR | C | 922 | 104.931 | 56.698 | 101.769 | 1.00 | 0.00 | O |
| ATOM | 7829 | CB  | THR | C | 922 | 107.365 | 55.964 | 99.951  | 1.00 | 0.00 | C |
| ATOM | 7830 | CG2 | THR | C | 922 | 107.916 | 57.398 | 99.994  | 1.00 | 0.00 | C |
| ATOM | 7831 | OG1 | THR | C | 922 | 107.631 | 55.295 | 101.176 | 1.00 | 0.00 | O |
| ATOM | 7832 | N   | THR | C | 923 | 105.189 | 58.262 | 100.144 | 1.00 | 0.00 | N |
| ATOM | 7833 | CA  | THR | C | 923 | 104.738 | 59.401 | 100.885 | 1.00 | 0.00 | C |
| ATOM | 7834 | C   | THR | C | 923 | 103.273 | 59.281 | 101.157 | 1.00 | 0.00 | C |
| ATOM | 7835 | O   | THR | C | 923 | 102.553 | 58.548 | 100.481 | 1.00 | 0.00 | O |
| ATOM | 7836 | CB  | THR | C | 923 | 104.963 | 60.675 | 100.123 | 1.00 | 0.00 | C |
| ATOM | 7837 | CG2 | THR | C | 923 | 104.546 | 61.878 | 100.988 | 1.00 | 0.00 | C |
| ATOM | 7838 | OG1 | THR | C | 923 | 106.333 | 60.788 | 99.781  | 1.00 | 0.00 | O |
| ATOM | 7839 | N   | TYR | C | 924 | 102.801 | 60.017 | 102.184 | 1.00 | 0.00 | N |
| ATOM | 7840 | CA  | TYR | C | 924 | 101.413 | 60.000 | 102.533 | 1.00 | 0.00 | C |
| ATOM | 7841 | C   | TYR | C | 924 | 100.866 | 61.307 | 102.074 | 1.00 | 0.00 | C |
| ATOM | 7842 | O   | TYR | C | 924 | 101.318 | 62.371 | 102.494 | 1.00 | 0.00 | O |
| ATOM | 7843 | CB  | TYR | C | 924 | 101.158 | 59.916 | 104.050 | 1.00 | 0.00 | C |
| ATOM | 7844 | CG  | TYR | C | 924 | 101.737 | 58.637 | 104.545 | 1.00 | 0.00 | C |
| ATOM | 7845 | CD1 | TYR | C | 924 | 103.073 | 58.562 | 104.867 | 1.00 | 0.00 | C |
| ATOM | 7846 | CD2 | TYR | C | 924 | 100.955 | 57.515 | 104.690 | 1.00 | 0.00 | C |
| ATOM | 7847 | CE1 | TYR | C | 924 | 103.620 | 57.389 | 105.327 | 1.00 | 0.00 | C |
| ATOM | 7848 | CE2 | TYR | C | 924 | 101.496 | 56.337 | 105.150 | 1.00 | 0.00 | C |
| ATOM | 7849 | CZ  | TYR | C | 924 | 102.831 | 56.271 | 105.469 | 1.00 | 0.00 | C |
| ATOM | 7850 | OH  | TYR | C | 924 | 103.390 | 55.065 | 105.941 | 1.00 | 0.00 | O |
| ATOM | 7851 | N   | ASP | C | 925 | 99.886  | 61.236 | 101.161 | 1.00 | 0.00 | N |
| ATOM | 7852 | CA  | ASP | C | 925 | 99.279  | 62.397 | 100.602 | 1.00 | 0.00 | C |
| ATOM | 7853 | C   | ASP | C | 925 | 98.294  | 62.891 | 101.605 | 1.00 | 0.00 | C |
| ATOM | 7854 | O   | ASP | C | 925 | 97.966  | 62.191 | 102.562 | 1.00 | 0.00 | O |
| ATOM | 7855 | CB  | ASP | C | 925 | 98.499  | 62.067 | 99.316  | 1.00 | 0.00 | C |
| ATOM | 7856 | CG  | ASP | C | 925 | 98.039  | 63.343 | 98.632  | 1.00 | 0.00 | C |
| ATOM | 7857 | OD1 | ASP | C | 925 | 98.599  | 64.426 | 98.942  | 1.00 | 0.00 | O |
| ATOM | 7858 | OD2 | ASP | C | 925 | 97.116  | 63.250 | 97.782  | 1.00 | 0.00 | O |
| ATOM | 7859 | N   | PHE | C | 926 | 97.831  | 64.139 | 101.424 | 1.00 | 0.00 | N |
| ATOM | 7860 | CA  | PHE | C | 926 | 96.793  | 64.627 | 102.264 | 1.00 | 0.00 | C |
| ATOM | 7861 | C   | PHE | C | 926 | 95.557  | 64.043 | 101.680 | 1.00 | 0.00 | C |
| ATOM | 7862 | O   | PHE | C | 926 | 95.496  | 63.778 | 100.481 | 1.00 | 0.00 | O |
| ATOM | 7863 | CB  | PHE | C | 926 | 96.689  | 66.163 | 102.304 | 1.00 | 0.00 | C |
| ATOM | 7864 | CG  | PHE | C | 926 | 96.448  | 66.667 | 100.923 | 1.00 | 0.00 | C |
| ATOM | 7865 | CD1 | PHE | C | 926 | 97.470  | 66.685 | 100.004 | 1.00 | 0.00 | C |
| ATOM | 7866 | CD2 | PHE | C | 926 | 95.212  | 67.146 | 100.554 | 1.00 | 0.00 | C |
| ATOM | 7867 | CE1 | PHE | C | 926 | 97.263  | 67.158 | 98.729  | 1.00 | 0.00 | C |
| ATOM | 7868 | CE2 | PHE | C | 926 | 94.998  | 67.620 | 99.281  | 1.00 | 0.00 | C |
| ATOM | 7869 | CZ  | PHE | C | 926 | 96.023  | 67.623 | 98.364  | 1.00 | 0.00 | C |

|        |      |     |     |   |     |        |        |         |      |      |   |
|--------|------|-----|-----|---|-----|--------|--------|---------|------|------|---|
| ATOM   | 7870 | N   | ALA | C | 927 | 94.540 | 63.794 | 102.518 | 1.00 | 0.00 | N |
| ATOM   | 7871 | CA  | ALA | C | 927 | 93.368 | 63.158 | 102.004 | 1.00 | 0.00 | C |
| ATOM   | 7872 | C   | ALA | C | 927 | 92.767 | 64.056 | 100.980 | 1.00 | 0.00 | C |
| ATOM   | 7873 | O   | ALA | C | 927 | 92.948 | 65.273 | 101.010 | 1.00 | 0.00 | O |
| ATOM   | 7874 | CB  | ALA | C | 927 | 92.299 | 62.877 | 103.072 | 1.00 | 0.00 | C |
| HETATM | 7875 | N   | HIE | C | 928 | 92.057 | 63.461 | 100.012 | 1.00 | 0.00 | N |
| HETATM | 7876 | CA  | HIE | C | 928 | 91.472 | 64.287 | 99.013  | 1.00 | 0.00 | C |
| HETATM | 7877 | C   | HIE | C | 928 | 90.196 | 64.808 | 99.564  | 1.00 | 0.00 | C |
| HETATM | 7878 | O   | HIE | C | 928 | 89.476 | 64.104 | 100.272 | 1.00 | 0.00 | O |
| HETATM | 7879 | CB  | HIE | C | 928 | 91.172 | 63.558 | 97.692  | 1.00 | 0.00 | C |
| HETATM | 7880 | CG  | HIE | C | 928 | 90.705 | 64.502 | 96.631  | 1.00 | 0.00 | C |
| HETATM | 7881 | CD2 | HIE | C | 928 | 89.554 | 64.514 | 95.903  | 1.00 | 0.00 | C |
| HETATM | 7882 | ND1 | HIE | C | 928 | 91.439 | 65.581 | 96.199  | 1.00 | 0.00 | N |
| HETATM | 7883 | CE1 | HIE | C | 928 | 90.699 | 66.196 | 95.238  | 1.00 | 0.00 | C |
| HETATM | 7884 | NE2 | HIE | C | 928 | 89.550 | 65.583 | 95.023  | 1.00 | 0.00 | N |
| ATOM   | 7885 | N   | CYS | C | 929 | 89.887 | 66.083 | 99.270  | 1.00 | 0.00 | N |
| ATOM   | 7886 | CA  | CYS | C | 929 | 88.661 | 66.615 | 99.769  | 1.00 | 0.00 | C |
| ATOM   | 7887 | C   | CYS | C | 929 | 87.575 | 65.863 | 99.080  | 1.00 | 0.00 | C |
| ATOM   | 7888 | O   | CYS | C | 929 | 87.669 | 65.559 | 97.891  | 1.00 | 0.00 | O |
| ATOM   | 7889 | CB  | CYS | C | 929 | 88.494 | 68.126 | 99.515  | 1.00 | 0.00 | C |
| ATOM   | 7890 | SG  | CYS | C | 929 | 88.675 | 68.569 | 97.766  | 1.00 | 0.00 | S |
| ATOM   | 7891 | N   | THR | C | 930 | 86.510 | 65.528 | 99.828  | 1.00 | 0.00 | N |
| ATOM   | 7892 | CA  | THR | C | 930 | 85.479 | 64.702 | 99.280  | 1.00 | 0.00 | C |
| ATOM   | 7893 | C   | THR | C | 930 | 84.855 | 65.388 | 98.109  | 1.00 | 0.00 | C |
| ATOM   | 7894 | O   | THR | C | 930 | 84.682 | 64.777 | 97.056  | 1.00 | 0.00 | O |
| ATOM   | 7895 | CB  | THR | C | 930 | 84.410 | 64.353 | 100.276 | 1.00 | 0.00 | C |
| ATOM   | 7896 | CG2 | THR | C | 930 | 83.675 | 65.629 | 100.725 | 1.00 | 0.00 | C |
| ATOM   | 7897 | OG1 | THR | C | 930 | 83.498 | 63.427 | 99.705  | 1.00 | 0.00 | O |
| ATOM   | 7898 | N   | PHE | C | 931 | 84.519 | 66.684 | 98.243  | 1.00 | 0.00 | N |
| ATOM   | 7899 | CA  | PHE | C | 931 | 83.928 | 67.350 | 97.127  | 1.00 | 0.00 | C |
| ATOM   | 7900 | C   | PHE | C | 931 | 85.045 | 67.583 | 96.169  | 1.00 | 0.00 | C |
| ATOM   | 7901 | O   | PHE | C | 931 | 86.183 | 67.801 | 96.580  | 1.00 | 0.00 | O |
| ATOM   | 7902 | CB  | PHE | C | 931 | 83.295 | 68.702 | 97.497  | 1.00 | 0.00 | C |
| ATOM   | 7903 | CG  | PHE | C | 931 | 82.218 | 68.393 | 98.479  | 1.00 | 0.00 | C |
| ATOM   | 7904 | CD1 | PHE | C | 931 | 82.521 | 68.228 | 99.809  | 1.00 | 0.00 | C |
| ATOM   | 7905 | CD2 | PHE | C | 931 | 80.909 | 68.260 | 98.073  | 1.00 | 0.00 | C |
| ATOM   | 7906 | CE1 | PHE | C | 931 | 81.535 | 67.936 | 100.726 | 1.00 | 0.00 | C |
| ATOM   | 7907 | CE2 | PHE | C | 931 | 79.922 | 67.971 | 98.986  | 1.00 | 0.00 | C |
| ATOM   | 7908 | CZ  | PHE | C | 931 | 80.231 | 67.809 | 100.314 | 1.00 | 0.00 | C |
| ATOM   | 7909 | N   | THR | C | 932 | 84.760 | 67.512 | 94.859  | 1.00 | 0.00 | N |
| ATOM   | 7910 | CA  | THR | C | 932 | 85.820 | 67.695 | 93.913  | 1.00 | 0.00 | C |
| ATOM   | 7911 | C   | THR | C | 932 | 85.932 | 69.155 | 93.629  | 1.00 | 0.00 | C |
| ATOM   | 7912 | O   | THR | C | 932 | 85.304 | 69.975 | 94.300  | 1.00 | 0.00 | O |
| ATOM   | 7913 | CB  | THR | C | 932 | 85.599 | 66.971 | 92.614  | 1.00 | 0.00 | C |

|      |      |               |         |        |        |      |      |     |
|------|------|---------------|---------|--------|--------|------|------|-----|
| ATOM | 7914 | CG2 THR C 932 | 85.475  | 65.466 | 92.906 | 1.00 | 0.00 | C   |
| ATOM | 7915 | OG1 THR C 932 | 84.428  | 67.448 | 91.972 | 1.00 | 0.00 | O   |
| ATOM | 7916 | N GLY C 933   | 86.778  | 69.515 | 92.646 | 1.00 | 0.00 | N   |
| ATOM | 7917 | CA GLY C 933  | 86.959  | 70.893 | 92.289 | 1.00 | 0.00 | C   |
| ATOM | 7918 | C GLY C 933   | 87.193  | 70.941 | 90.813 | 1.00 | 0.00 | C   |
| ATOM | 7919 | O GLY C 933   | 87.629  | 69.959 | 90.214 | 1.00 | 0.00 | O   |
| ATOM | 7920 | N ASN C 934   | 86.903  | 72.101 | 90.186 | 1.00 | 0.00 | N   |
| ATOM | 7921 | CA ASN C 934  | 87.031  | 72.208 | 88.762 | 1.00 | 0.00 | C   |
| ATOM | 7922 | C ASN C 934   | 88.461  | 72.019 | 88.355 | 1.00 | 0.00 | C   |
| ATOM | 7923 | O ASN C 934   | 88.779  | 71.117 | 87.582 | 1.00 | 0.00 | O   |
| ATOM | 7924 | CB ASN C 934  | 86.587  | 73.587 | 88.238 | 1.00 | 0.00 | C   |
| ATOM | 7925 | CG ASN C 934  | 86.503  | 73.528 | 86.718 | 1.00 | 0.00 | C   |
| ATOM | 7926 | ND2 ASN C 934 | 87.580  | 72.999 | 86.077 | 1.00 | 0.00 | N   |
| ATOM | 7927 | OD1 ASN C 934 | 85.517  | 73.950 | 86.116 | 1.00 | 0.00 | O   |
| ATOM | 7928 | N GLU C 935   | 89.380  | 72.840 | 88.897 | 1.00 | 0.00 | N   |
| ATOM | 7929 | CA GLU C 935  | 90.744  | 72.691 | 88.483 | 1.00 | 0.00 | C   |
| ATOM | 7930 | C GLU C 935   | 91.509  | 72.249 | 89.678 | 1.00 | 0.00 | C   |
| ATOM | 7931 | O GLU C 935   | 91.141  | 72.561 | 90.810 | 1.00 | 0.00 | O   |
| ATOM | 7932 | CB GLU C 935  | 91.397  | 73.982 | 87.971 | 1.00 | 0.00 | C   |
| ATOM | 7933 | CG GLU C 935  | 92.806  | 73.741 | 87.422 | 1.00 | 0.00 | C   |
| ATOM | 7934 | CD GLU C 935  | 93.354  | 75.068 | 86.923 | 1.00 | 0.00 | C   |
| ATOM | 7935 | OE1 GLU C 935 | 92.561  | 75.853 | 86.336 | 1.00 | 0.00 | O   |
| ATOM | 7936 | OE2 GLU C 935 | 94.571  | 75.314 | 87.122 | 1.00 | 0.00 | O   |
| ATOM | 7937 | N SER C 936   | 92.591  | 71.484 | 89.455 | 1.00 | 0.00 | N   |
| ATOM | 7938 | CA SER C 936  | 93.321  | 71.008 | 90.586 | 1.00 | 0.00 | C   |
| ATOM | 7939 | C SER C 936   | 94.778  | 71.105 | 90.284 | 1.00 | 0.00 | C   |
| ATOM | 7940 | O SER C 936   | 95.182  | 71.247 | 89.129 | 1.00 | 0.00 | O   |
| ATOM | 7941 | CB SER C 936  | 93.017  | 69.538 | 90.917 | 1.00 | 0.00 | C   |
| ATOM | 7942 | OG SER C 936  | 93.764  | 69.116 | 92.048 | 1.00 | 0.00 | O   |
| ATOM | 7943 | N LYS C 937   | 95.610  | 71.081 | 91.344 | 1.00 | 0.00 | N   |
| ATOM | 7944 | CA LYS C 937  | 97.025  | 71.084 | 91.129 | 1.00 | 0.00 | C   |
| ATOM | 7945 | C LYS C 937   | 97.591  | 69.983 | 91.975 | 1.00 | 0.00 | C   |
| ATOM | 7946 | O LYS C 937   | 97.842  | 70.136 | 93.168 | 1.00 | 0.00 | O   |
| ATOM | 7947 | CB LYS C 937  | 97.696  | 72.405 | 91.535 | 1.00 | 0.00 | C   |
| ATOM | 7948 | CG LYS C 937  | 97.252  | 73.582 | 90.662 | 1.00 | 0.00 | C   |
| ATOM | 7949 | CD LYS C 937  | 97.560  | 73.390 | 89.177 | 1.00 | 0.00 | C   |
| ATOM | 7950 | CE LYS C 937  | 97.127  | 74.567 | 88.297 | 1.00 | 0.00 | C   |
| ATOM | 7951 | NZ LYS C 937  | 97.465  | 74.296 | 86.883 | 1.00 | 0.00 | N1+ |
| ATOM | 7952 | N PRO C 938   | 97.789  | 68.863 | 91.342 | 1.00 | 0.00 | N   |
| ATOM | 7953 | CA PRO C 938  | 98.339  | 67.699 | 91.986 | 1.00 | 0.00 | C   |
| ATOM | 7954 | C PRO C 938   | 99.825  | 67.829 | 92.081 | 1.00 | 0.00 | C   |
| ATOM | 7955 | O PRO C 938   | 100.364 | 68.846 | 91.656 | 1.00 | 0.00 | O   |
| ATOM | 7956 | CB PRO C 938  | 97.887  | 66.493 | 91.155 | 1.00 | 0.00 | C   |
| ATOM | 7957 | CG PRO C 938  | 97.384  | 67.093 | 89.834 | 1.00 | 0.00 | C   |

|      |      |     |     |   |     |         |        |        |      |      |   |
|------|------|-----|-----|---|-----|---------|--------|--------|------|------|---|
| ATOM | 7958 | CD  | PRO | C | 938 | 96.925  | 68.503 | 90.231 | 1.00 | 0.00 | C |
| ATOM | 7959 | N   | LEU | C | 939 | 100.501 | 66.808 | 92.637 | 1.00 | 0.00 | N |
| ATOM | 7960 | CA  | LEU | C | 939 | 101.919 | 66.871 | 92.830 | 1.00 | 0.00 | C |
| ATOM | 7961 | C   | LEU | C | 939 | 102.604 | 66.922 | 91.506 | 1.00 | 0.00 | C |
| ATOM | 7962 | O   | LEU | C | 939 | 102.401 | 66.072 | 90.639 | 1.00 | 0.00 | O |
| ATOM | 7963 | CB  | LEU | C | 939 | 102.458 | 65.675 | 93.625 | 1.00 | 0.00 | C |
| ATOM | 7964 | CG  | LEU | C | 939 | 101.873 | 65.605 | 95.048 | 1.00 | 0.00 | C |
| ATOM | 7965 | CD1 | LEU | C | 939 | 100.357 | 65.343 | 95.039 | 1.00 | 0.00 | C |
| ATOM | 7966 | CD2 | LEU | C | 939 | 102.627 | 64.583 | 95.897 | 1.00 | 0.00 | C |
| ATOM | 7967 | N   | CYS | C | 940 | 103.463 | 67.944 | 91.339 | 1.00 | 0.00 | N |
| ATOM | 7968 | CA  | CYS | C | 940 | 104.137 | 68.106 | 90.091 | 1.00 | 0.00 | C |
| ATOM | 7969 | C   | CYS | C | 940 | 105.048 | 66.976 | 89.925 | 1.00 | 0.00 | C |
| ATOM | 7970 | O   | CYS | C | 940 | 105.855 | 66.636 | 90.786 | 1.00 | 0.00 | O |
| ATOM | 7971 | CB  | CYS | C | 940 | 104.970 | 69.390 | 89.968 | 1.00 | 0.00 | C |
| ATOM | 7972 | SG  | CYS | C | 940 | 103.926 | 70.866 | 89.832 | 1.00 | 0.00 | S |
| ATOM | 7973 | N   | VAL | C | 941 | 104.922 | 66.350 | 88.765 | 1.00 | 0.00 | N |
| ATOM | 7974 | CA  | VAL | C | 941 | 105.781 | 65.255 | 88.554 | 1.00 | 0.00 | C |
| ATOM | 7975 | C   | VAL | C | 941 | 106.267 | 65.402 | 87.164 | 1.00 | 0.00 | C |
| ATOM | 7976 | O   | VAL | C | 941 | 105.733 | 66.183 | 86.379 | 1.00 | 0.00 | O |
| ATOM | 7977 | CB  | VAL | C | 941 | 105.071 | 63.949 | 88.701 | 1.00 | 0.00 | C |
| ATOM | 7978 | CG1 | VAL | C | 941 | 104.555 | 63.858 | 90.149 | 1.00 | 0.00 | C |
| ATOM | 7979 | CG2 | VAL | C | 941 | 103.957 | 63.879 | 87.645 | 1.00 | 0.00 | C |
| ATOM | 7980 | N   | GLU | C | 942 | 107.368 | 64.710 | 86.851 | 1.00 | 0.00 | N |
| ATOM | 7981 | CA  | GLU | C | 942 | 107.857 | 64.758 | 85.516 | 1.00 | 0.00 | C |
| ATOM | 7982 | C   | GLU | C | 942 | 106.894 | 64.010 | 84.641 | 1.00 | 0.00 | C |
| ATOM | 7983 | O   | GLU | C | 942 | 106.692 | 64.371 | 83.483 | 1.00 | 0.00 | O |
| ATOM | 7984 | CB  | GLU | C | 942 | 109.245 | 64.120 | 85.353 | 1.00 | 0.00 | C |
| ATOM | 7985 | CG  | GLU | C | 942 | 109.763 | 64.190 | 83.918 | 1.00 | 0.00 | C |
| ATOM | 7986 | CD  | GLU | C | 942 | 111.201 | 63.684 | 83.906 | 1.00 | 0.00 | C |
| ATOM | 7987 | OE1 | GLU | C | 942 | 111.776 | 63.517 | 85.012 | 1.00 | 0.00 | O |
| ATOM | 7988 | OE2 | GLU | C | 942 | 111.737 | 63.462 | 82.787 | 1.00 | 0.00 | O |
| ATOM | 7989 | N   | LEU | C | 943 | 106.286 | 62.934 | 85.191 | 1.00 | 0.00 | N |
| ATOM | 7990 | CA  | LEU | C | 943 | 105.414 | 62.038 | 84.465 | 1.00 | 0.00 | C |
| ATOM | 7991 | C   | LEU | C | 943 | 103.985 | 62.523 | 84.438 | 1.00 | 0.00 | C |
| ATOM | 7992 | O   | LEU | C | 943 | 103.689 | 63.610 | 84.928 | 1.00 | 0.00 | O |
| ATOM | 7993 | CB  | LEU | C | 943 | 105.452 | 60.597 | 84.996 | 1.00 | 0.00 | C |
| ATOM | 7994 | CG  | LEU | C | 943 | 106.815 | 59.928 | 84.744 | 1.00 | 0.00 | C |
| ATOM | 7995 | CD1 | LEU | C | 943 | 107.941 | 60.661 | 85.487 | 1.00 | 0.00 | C |
| ATOM | 7996 | CD2 | LEU | C | 943 | 106.772 | 58.425 | 85.057 | 1.00 | 0.00 | C |
| ATOM | 7997 | N   | ASP | C | 944 | 103.075 | 61.737 | 83.795 | 1.00 | 0.00 | N |
| ATOM | 7998 | CA  | ASP | C | 944 | 101.681 | 62.087 | 83.582 | 1.00 | 0.00 | C |
| ATOM | 7999 | C   | ASP | C | 944 | 100.723 | 61.247 | 84.419 | 1.00 | 0.00 | C |
| ATOM | 8000 | O   | ASP | C | 944 | 101.149 | 60.568 | 85.355 | 1.00 | 0.00 | O |
| ATOM | 8001 | CB  | ASP | C | 944 | 101.256 | 61.927 | 82.115 | 1.00 | 0.00 | C |

|        |      |     |     |   |     |         |        |        |      |      |   |
|--------|------|-----|-----|---|-----|---------|--------|--------|------|------|---|
| ATOM   | 8002 | CG  | ASP | C | 944 | 102.034 | 62.949 | 81.297 | 1.00 | 0.00 | C |
| ATOM   | 8003 | OD1 | ASP | C | 944 | 102.117 | 64.130 | 81.735 | 1.00 | 0.00 | O |
| ATOM   | 8004 | OD2 | ASP | C | 944 | 102.554 | 62.564 | 80.215 | 1.00 | 0.00 | O |
| ATOM   | 8005 | N   | GLU | C | 945 | 99.384  | 61.318 | 84.123 | 1.00 | 0.00 | N |
| ATOM   | 8006 | CA  | GLU | C | 945 | 98.357  | 60.567 | 84.830 | 1.00 | 0.00 | C |
| ATOM   | 8007 | C   | GLU | C | 945 | 96.984  | 60.871 | 84.242 | 1.00 | 0.00 | C |
| ATOM   | 8008 | O   | GLU | C | 945 | 96.882  | 61.407 | 83.142 | 1.00 | 0.00 | O |
| ATOM   | 8009 | CB  | GLU | C | 945 | 98.330  | 60.864 | 86.339 | 1.00 | 0.00 | C |
| ATOM   | 8010 | CG  | GLU | C | 945 | 97.522  | 59.848 | 87.147 | 1.00 | 0.00 | C |
| ATOM   | 8011 | CD  | GLU | C | 945 | 97.635  | 60.216 | 88.618 | 1.00 | 0.00 | C |
| ATOM   | 8012 | OE1 | GLU | C | 945 | 98.349  | 61.209 | 88.926 | 1.00 | 0.00 | O |
| ATOM   | 8013 | OE2 | GLU | C | 945 | 97.016  | 59.510 | 89.456 | 1.00 | 0.00 | O |
| HETATM | 8014 | N   | HIE | C | 946 | 95.870  | 60.488 | 84.931 | 1.00 | 0.00 | N |
| HETATM | 8015 | CA  | HIE | C | 946 | 94.555  | 60.776 | 84.400 | 1.00 | 0.00 | C |
| HETATM | 8016 | C   | HIE | C | 946 | 93.714  | 61.415 | 85.464 | 1.00 | 0.00 | C |
| HETATM | 8017 | O   | HIE | C | 946 | 93.813  | 61.077 | 86.642 | 1.00 | 0.00 | O |
| HETATM | 8018 | CB  | HIE | C | 946 | 93.787  | 59.541 | 83.906 | 1.00 | 0.00 | C |
| HETATM | 8019 | CG  | HIE | C | 946 | 93.265  | 58.694 | 85.023 | 1.00 | 0.00 | C |
| HETATM | 8020 | CD2 | HIE | C | 946 | 92.005  | 58.606 | 85.537 | 1.00 | 0.00 | C |
| HETATM | 8021 | ND1 | HIE | C | 946 | 94.030  | 57.816 | 85.752 | 1.00 | 0.00 | N |
| HETATM | 8022 | CE1 | HIE | C | 946 | 93.206  | 57.240 | 86.666 | 1.00 | 0.00 | C |
| HETATM | 8023 | NE2 | HIE | C | 946 | 91.968  | 57.688 | 86.572 | 1.00 | 0.00 | N |
| ATOM   | 8024 | N   | ASN | C | 947 | 92.847  | 62.371 | 85.065 | 1.00 | 0.00 | N |
| ATOM   | 8025 | CA  | ASN | C | 947 | 92.023  | 63.055 | 86.023 | 1.00 | 0.00 | C |
| ATOM   | 8026 | C   | ASN | C | 947 | 90.712  | 63.378 | 85.385 | 1.00 | 0.00 | C |
| ATOM   | 8027 | O   | ASN | C | 947 | 90.376  | 62.891 | 84.310 | 1.00 | 0.00 | O |
| ATOM   | 8028 | CB  | ASN | C | 947 | 92.615  | 64.394 | 86.504 | 1.00 | 0.00 | C |
| ATOM   | 8029 | CG  | ASN | C | 947 | 93.847  | 64.104 | 87.352 | 1.00 | 0.00 | C |
| ATOM   | 8030 | ND2 | ASN | C | 947 | 94.925  | 64.909 | 87.148 | 1.00 | 0.00 | N |
| ATOM   | 8031 | OD1 | ASN | C | 947 | 93.854  | 63.189 | 88.171 | 1.00 | 0.00 | O |
| ATOM   | 8032 | N   | LEU | C | 948 | 89.921  | 64.203 | 86.093 | 1.00 | 0.00 | N |
| ATOM   | 8033 | CA  | LEU | C | 948 | 88.639  | 64.662 | 85.646 | 1.00 | 0.00 | C |
| ATOM   | 8034 | C   | LEU | C | 948 | 88.847  | 65.501 | 84.414 | 1.00 | 0.00 | C |
| ATOM   | 8035 | O   | LEU | C | 948 | 88.054  | 65.403 | 83.474 | 1.00 | 0.00 | O |
| ATOM   | 8036 | CB  | LEU | C | 948 | 87.954  | 65.558 | 86.691 | 1.00 | 0.00 | C |
| ATOM   | 8037 | CG  | LEU | C | 948 | 87.751  | 64.883 | 88.059 | 1.00 | 0.00 | C |
| ATOM   | 8038 | CD1 | LEU | C | 948 | 87.063  | 65.841 | 89.036 | 1.00 | 0.00 | C |
| ATOM   | 8039 | CD2 | LEU | C | 948 | 86.998  | 63.549 | 87.932 | 1.00 | 0.00 | C |
| ATOM   | 8040 | N   | PRO | C | 949 | 89.871  | 66.323 | 84.364 | 1.00 | 0.00 | N |
| ATOM   | 8041 | CA  | PRO | C | 949 | 90.063  | 67.132 | 83.191 | 1.00 | 0.00 | C |
| ATOM   | 8042 | C   | PRO | C | 949 | 90.485  | 66.308 | 82.026 | 1.00 | 0.00 | C |
| ATOM   | 8043 | O   | PRO | C | 949 | 90.969  | 65.193 | 82.224 | 1.00 | 0.00 | O |
| ATOM   | 8044 | CB  | PRO | C | 949 | 91.081  | 68.205 | 83.576 | 1.00 | 0.00 | C |
| ATOM   | 8045 | CG  | PRO | C | 949 | 90.853  | 68.388 | 85.086 | 1.00 | 0.00 | C |

|      |      |     |     |   |     |        |        |        |      |      |   |
|------|------|-----|-----|---|-----|--------|--------|--------|------|------|---|
| ATOM | 8046 | CD  | PRO | C | 949 | 90.349 | 67.013 | 85.558 | 1.00 | 0.00 | C |
| ATOM | 8047 | N   | ARG | C | 950 | 90.289 | 66.836 | 80.801 | 1.00 | 0.00 | N |
| ATOM | 8048 | CA  | ARG | C | 950 | 90.630 | 66.104 | 79.622 | 1.00 | 0.00 | C |
| ATOM | 8049 | C   | ARG | C | 950 | 91.977 | 66.551 | 79.149 | 1.00 | 0.00 | C |
| ATOM | 8050 | O   | ARG | C | 950 | 92.103 | 67.496 | 78.370 | 1.00 | 0.00 | O |
| ATOM | 8051 | CB  | ARG | C | 950 | 89.631 | 66.358 | 78.486 | 1.00 | 0.00 | C |
| ATOM | 8052 | CG  | ARG | C | 950 | 90.043 | 65.768 | 77.138 | 1.00 | 0.00 | C |
| ATOM | 8053 | CD  | ARG | C | 950 | 89.014 | 66.046 | 76.041 | 1.00 | 0.00 | C |
| ATOM | 8054 | NE  | ARG | C | 950 | 89.652 | 65.707 | 74.737 | 1.00 | 0.00 | N |
| ATOM | 8055 | CZ  | ARG | C | 950 | 89.672 | 64.415 | 74.305 | 1.00 | 0.00 | C |
| ATOM | 8056 | NH1 | ARG | C | 950 | 89.151 | 63.426 | 75.088 | 1.00 | 0.00 | N |
| ATOM | 8057 | NH2 | ARG | C | 950 | 90.216 | 64.111 | 73.092 | 1.00 | 0.00 | N |
| ATOM | 8058 | N   | PHE | C | 951 | 93.020 | 65.862 | 79.641 | 1.00 | 0.00 | N |
| ATOM | 8059 | CA  | PHE | C | 951 | 94.388 | 66.059 | 79.255 | 1.00 | 0.00 | C |
| ATOM | 8060 | C   | PHE | C | 951 | 94.558 | 65.567 | 77.839 | 1.00 | 0.00 | C |
| ATOM | 8061 | O   | PHE | C | 951 | 95.253 | 66.198 | 77.041 | 1.00 | 0.00 | O |
| ATOM | 8062 | CB  | PHE | C | 951 | 95.363 | 65.257 | 80.135 | 1.00 | 0.00 | C |
| ATOM | 8063 | CG  | PHE | C | 951 | 95.159 | 65.701 | 81.541 | 1.00 | 0.00 | C |
| ATOM | 8064 | CD1 | PHE | C | 951 | 95.817 | 66.799 | 82.036 | 1.00 | 0.00 | C |
| ATOM | 8065 | CD2 | PHE | C | 951 | 94.295 | 65.008 | 82.363 | 1.00 | 0.00 | C |
| ATOM | 8066 | CE1 | PHE | C | 951 | 95.618 | 67.201 | 83.337 | 1.00 | 0.00 | C |
| ATOM | 8067 | CE2 | PHE | C | 951 | 94.093 | 65.411 | 83.663 | 1.00 | 0.00 | C |
| ATOM | 8068 | CZ  | PHE | C | 951 | 94.757 | 66.507 | 84.151 | 1.00 | 0.00 | C |
| ATOM | 8069 | N   | PRO | C | 952 | 93.940 | 64.461 | 77.488 | 1.00 | 0.00 | N |
| ATOM | 8070 | CA  | PRO | C | 952 | 94.097 | 63.959 | 76.150 | 1.00 | 0.00 | C |
| ATOM | 8071 | C   | PRO | C | 952 | 93.526 | 64.885 | 75.135 | 1.00 | 0.00 | C |
| ATOM | 8072 | O   | PRO | C | 952 | 93.632 | 64.596 | 73.945 | 1.00 | 0.00 | O |
| ATOM | 8073 | CB  | PRO | C | 952 | 93.485 | 62.560 | 76.149 | 1.00 | 0.00 | C |
| ATOM | 8074 | CG  | PRO | C | 952 | 93.735 | 62.071 | 77.583 | 1.00 | 0.00 | C |
| ATOM | 8075 | CD  | PRO | C | 952 | 93.749 | 63.357 | 78.425 | 1.00 | 0.00 | C |
| ATOM | 8076 | N   | GLU | C | 953 | 92.891 | 65.984 | 75.558 | 1.00 | 0.00 | N |
| ATOM | 8077 | CA  | GLU | C | 953 | 92.369 | 66.880 | 74.573 | 1.00 | 0.00 | C |
| ATOM | 8078 | C   | GLU | C | 953 | 93.532 | 67.376 | 73.766 | 1.00 | 0.00 | C |
| ATOM | 8079 | O   | GLU | C | 953 | 93.433 | 67.521 | 72.552 | 1.00 | 0.00 | O |
| ATOM | 8080 | CB  | GLU | C | 953 | 91.664 | 68.098 | 75.187 | 1.00 | 0.00 | C |
| ATOM | 8081 | CG  | GLU | C | 953 | 90.858 | 68.922 | 74.176 | 1.00 | 0.00 | C |
| ATOM | 8082 | CD  | GLU | C | 953 | 91.822 | 69.729 | 73.320 | 1.00 | 0.00 | C |
| ATOM | 8083 | OE1 | GLU | C | 953 | 92.696 | 70.425 | 73.906 | 1.00 | 0.00 | O |
| ATOM | 8084 | OE2 | GLU | C | 953 | 91.704 | 69.656 | 72.068 | 1.00 | 0.00 | O |
| ATOM | 8085 | N   | TRP | C | 954 | 94.674 | 67.647 | 74.430 | 1.00 | 0.00 | N |
| ATOM | 8086 | CA  | TRP | C | 954 | 95.840 | 68.172 | 73.776 | 1.00 | 0.00 | C |
| ATOM | 8087 | C   | TRP | C | 954 | 96.383 | 67.207 | 72.765 | 1.00 | 0.00 | C |
| ATOM | 8088 | O   | TRP | C | 954 | 96.736 | 67.598 | 71.655 | 1.00 | 0.00 | O |
| ATOM | 8089 | CB  | TRP | C | 954 | 96.986 | 68.486 | 74.755 | 1.00 | 0.00 | C |

|      |      |               |         |        |        |      |      |   |
|------|------|---------------|---------|--------|--------|------|------|---|
| ATOM | 8090 | CG TRP C 954  | 98.285  | 68.838 | 74.070 | 1.00 | 0.00 | C |
| ATOM | 8091 | CD1 TRP C 954 | 99.394  | 68.066 | 73.887 | 1.00 | 0.00 | C |
| ATOM | 8092 | CD2 TRP C 954 | 98.558  | 70.098 | 73.433 | 1.00 | 0.00 | C |
| ATOM | 8093 | CE2 TRP C 954 | 99.841  | 70.015 | 72.894 | 1.00 | 0.00 | C |
| ATOM | 8094 | CE3 TRP C 954 | 97.799  | 71.223 | 73.304 | 1.00 | 0.00 | C |
| ATOM | 8095 | NE1 TRP C 954 | 100.346 | 68.764 | 73.183 | 1.00 | 0.00 | N |
| ATOM | 8096 | CZ2 TRP C 954 | 100.390 | 71.064 | 72.214 | 1.00 | 0.00 | C |
| ATOM | 8097 | CZ3 TRP C 954 | 98.356  | 72.284 | 72.622 | 1.00 | 0.00 | C |
| ATOM | 8098 | CH2 TRP C 954 | 99.627  | 72.203 | 72.088 | 1.00 | 0.00 | C |
| ATOM | 8099 | N ILE C 955   | 96.431  | 65.909 | 73.113 | 1.00 | 0.00 | N |
| ATOM | 8100 | CA ILE C 955  | 97.028  | 64.910 | 72.272 | 1.00 | 0.00 | C |
| ATOM | 8101 | C ILE C 955   | 96.301  | 64.863 | 70.969 | 1.00 | 0.00 | C |
| ATOM | 8102 | O ILE C 955   | 96.872  | 64.497 | 69.947 | 1.00 | 0.00 | O |
| ATOM | 8103 | CB ILE C 955  | 97.020  | 63.519 | 72.842 | 1.00 | 0.00 | C |
| ATOM | 8104 | CG1 ILE C 955 | 95.595  | 62.961 | 72.968 | 1.00 | 0.00 | C |
| ATOM | 8105 | CG2 ILE C 955 | 97.790  | 63.559 | 74.170 | 1.00 | 0.00 | C |
| ATOM | 8106 | CD1 ILE C 955 | 95.556  | 61.459 | 73.242 | 1.00 | 0.00 | C |
| ATOM | 8107 | N THR C 956   | 95.009  | 65.235 | 70.976 | 1.00 | 0.00 | N |
| ATOM | 8108 | CA THR C 956  | 94.172  | 65.090 | 69.823 | 1.00 | 0.00 | C |
| ATOM | 8109 | C THR C 956   | 94.807  | 65.747 | 68.644 | 1.00 | 0.00 | C |
| ATOM | 8110 | O THR C 956   | 94.665  | 65.239 | 67.537 | 1.00 | 0.00 | O |
| ATOM | 8111 | CB THR C 956  | 92.820  | 65.716 | 69.983 | 1.00 | 0.00 | C |
| ATOM | 8112 | CG2 THR C 956 | 92.178  | 65.169 | 71.271 | 1.00 | 0.00 | C |
| ATOM | 8113 | OG1 THR C 956 | 92.936  | 67.128 | 70.054 | 1.00 | 0.00 | O |
| ATOM | 8114 | N ILE C 957   | 95.503  | 66.885 | 68.802 | 1.00 | 0.00 | N |
| ATOM | 8115 | CA ILE C 957  | 96.043  | 67.450 | 67.598 | 1.00 | 0.00 | C |
| ATOM | 8116 | C ILE C 957   | 97.023  | 66.505 | 66.951 | 1.00 | 0.00 | C |
| ATOM | 8117 | O ILE C 957   | 96.962  | 66.374 | 65.728 | 1.00 | 0.00 | O |
| ATOM | 8118 | CB ILE C 957  | 96.519  | 68.891 | 67.709 | 1.00 | 0.00 | C |
| ATOM | 8119 | CG1 ILE C 957 | 97.589  | 69.146 | 68.785 | 1.00 | 0.00 | C |
| ATOM | 8120 | CG2 ILE C 957 | 95.263  | 69.750 | 67.907 | 1.00 | 0.00 | C |
| ATOM | 8121 | CD1 ILE C 957 | 98.229  | 70.531 | 68.696 | 1.00 | 0.00 | C |
| ATOM | 8122 | N PRO C 958   | 97.924  | 65.817 | 67.616 | 1.00 | 0.00 | N |
| ATOM | 8123 | CA PRO C 958  | 98.716  | 64.860 | 66.891 | 1.00 | 0.00 | C |
| ATOM | 8124 | C PRO C 958   | 97.857  | 63.702 | 66.505 | 1.00 | 0.00 | C |
| ATOM | 8125 | O PRO C 958   | 98.187  | 62.996 | 65.552 | 1.00 | 0.00 | O |
| ATOM | 8126 | CB PRO C 958  | 99.871  | 64.477 | 67.812 | 1.00 | 0.00 | C |
| ATOM | 8127 | CG PRO C 958  | 100.054 | 65.722 | 68.695 | 1.00 | 0.00 | C |
| ATOM | 8128 | CD PRO C 958  | 98.651  | 66.340 | 68.764 | 1.00 | 0.00 | C |
| ATOM | 8129 | N LEU C 959   | 96.754  | 63.491 | 67.246 | 1.00 | 0.00 | N |
| ATOM | 8130 | CA LEU C 959  | 95.858  | 62.405 | 67.003 | 1.00 | 0.00 | C |
| ATOM | 8131 | C LEU C 959   | 95.271  | 62.645 | 65.651 | 1.00 | 0.00 | C |
| ATOM | 8132 | O LEU C 959   | 95.012  | 61.713 | 64.892 | 1.00 | 0.00 | O |
| ATOM | 8133 | CB LEU C 959  | 94.723  | 62.332 | 68.039 | 1.00 | 0.00 | C |

|      |      |     |     |   |     |         |        |        |      |      |   |
|------|------|-----|-----|---|-----|---------|--------|--------|------|------|---|
| ATOM | 8134 | CG  | LEU | C | 959 | 93.838  | 61.072 | 67.924 | 1.00 | 0.00 | C |
| ATOM | 8135 | CD1 | LEU | C | 959 | 92.988  | 61.071 | 66.646 | 1.00 | 0.00 | C |
| ATOM | 8136 | CD2 | LEU | C | 959 | 94.677  | 59.796 | 68.090 | 1.00 | 0.00 | C |
| ATOM | 8137 | N   | VAL | C | 960 | 95.061  | 63.931 | 65.324 | 1.00 | 0.00 | N |
| ATOM | 8138 | CA  | VAL | C | 960 | 94.503  | 64.344 | 64.075 | 1.00 | 0.00 | C |
| ATOM | 8139 | C   | VAL | C | 960 | 95.403  | 63.805 | 63.022 | 1.00 | 0.00 | C |
| ATOM | 8140 | O   | VAL | C | 960 | 94.948  | 63.269 | 62.014 | 1.00 | 0.00 | O |
| ATOM | 8141 | CB  | VAL | C | 960 | 94.502  | 65.843 | 63.939 | 1.00 | 0.00 | C |
| ATOM | 8142 | CG1 | VAL | C | 960 | 94.127  | 66.227 | 62.498 | 1.00 | 0.00 | C |
| ATOM | 8143 | CG2 | VAL | C | 960 | 93.563  | 66.424 | 65.009 | 1.00 | 0.00 | C |
| ATOM | 8144 | N   | CYS | C | 961 | 96.721  | 63.921 | 63.254 | 1.00 | 0.00 | N |
| ATOM | 8145 | CA  | CYS | C | 961 | 97.668  | 63.430 | 62.307 | 1.00 | 0.00 | C |
| ATOM | 8146 | C   | CYS | C | 961 | 97.479  | 61.955 | 62.195 | 1.00 | 0.00 | C |
| ATOM | 8147 | O   | CYS | C | 961 | 97.557  | 61.383 | 61.107 | 1.00 | 0.00 | O |
| ATOM | 8148 | CB  | CYS | C | 961 | 99.122  | 63.678 | 62.732 | 1.00 | 0.00 | C |
| ATOM | 8149 | SG  | CYS | C | 961 | 100.313 | 63.047 | 61.512 | 1.00 | 0.00 | S |
| ATOM | 8150 | N   | ILE | C | 962 | 97.199  | 61.295 | 63.333 | 1.00 | 0.00 | N |
| ATOM | 8151 | CA  | ILE | C | 962 | 97.090  | 59.866 | 63.371 | 1.00 | 0.00 | C |
| ATOM | 8152 | C   | ILE | C | 962 | 95.971  | 59.407 | 62.488 | 1.00 | 0.00 | C |
| ATOM | 8153 | O   | ILE | C | 962 | 96.143  | 58.481 | 61.698 | 1.00 | 0.00 | O |
| ATOM | 8154 | CB  | ILE | C | 962 | 96.763  | 59.352 | 64.743 | 1.00 | 0.00 | C |
| ATOM | 8155 | CG1 | ILE | C | 962 | 97.831  | 59.784 | 65.761 | 1.00 | 0.00 | C |
| ATOM | 8156 | CG2 | ILE | C | 962 | 96.598  | 57.828 | 64.641 | 1.00 | 0.00 | C |
| ATOM | 8157 | CD1 | ILE | C | 962 | 99.223  | 59.239 | 65.458 | 1.00 | 0.00 | C |
| ATOM | 8158 | N   | TYR | C | 963 | 94.799  | 60.064 | 62.575 | 1.00 | 0.00 | N |
| ATOM | 8159 | CA  | TYR | C | 963 | 93.665  | 59.563 | 61.855 | 1.00 | 0.00 | C |
| ATOM | 8160 | C   | TYR | C | 963 | 93.906  | 59.627 | 60.385 | 1.00 | 0.00 | C |
| ATOM | 8161 | O   | TYR | C | 963 | 93.454  | 58.754 | 59.648 | 1.00 | 0.00 | O |
| ATOM | 8162 | CB  | TYR | C | 963 | 92.311  | 60.233 | 62.179 | 1.00 | 0.00 | C |
| ATOM | 8163 | CG  | TYR | C | 963 | 92.251  | 61.643 | 61.711 | 1.00 | 0.00 | C |
| ATOM | 8164 | CD1 | TYR | C | 963 | 92.083  | 61.942 | 60.378 | 1.00 | 0.00 | C |
| ATOM | 8165 | CD2 | TYR | C | 963 | 92.322  | 62.670 | 62.621 | 1.00 | 0.00 | C |
| ATOM | 8166 | CE1 | TYR | C | 963 | 92.013  | 63.250 | 59.957 | 1.00 | 0.00 | C |
| ATOM | 8167 | CE2 | TYR | C | 963 | 92.250  | 63.979 | 62.207 | 1.00 | 0.00 | C |
| ATOM | 8168 | CZ  | TYR | C | 963 | 92.101  | 64.271 | 60.873 | 1.00 | 0.00 | C |
| ATOM | 8169 | OH  | TYR | C | 963 | 92.028  | 65.615 | 60.452 | 1.00 | 0.00 | O |
| ATOM | 8170 | N   | MET | C | 964 | 94.634  | 60.651 | 59.912 | 1.00 | 0.00 | N |
| ATOM | 8171 | CA  | MET | C | 964 | 94.804  | 60.813 | 58.495 | 1.00 | 0.00 | C |
| ATOM | 8172 | C   | MET | C | 964 | 95.425  | 59.570 | 57.931 | 1.00 | 0.00 | C |
| ATOM | 8173 | O   | MET | C | 964 | 95.016  | 59.089 | 56.877 | 1.00 | 0.00 | O |
| ATOM | 8174 | CB  | MET | C | 964 | 95.758  | 61.964 | 58.136 | 1.00 | 0.00 | C |
| ATOM | 8175 | CG  | MET | C | 964 | 95.263  | 63.347 | 58.570 | 1.00 | 0.00 | C |
| ATOM | 8176 | SD  | MET | C | 964 | 96.432  | 64.695 | 58.220 | 1.00 | 0.00 | S |
| ATOM | 8177 | CE  | MET | C | 964 | 97.662  | 64.152 | 59.443 | 1.00 | 0.00 | C |



|      |      |     |     |   |     |         |        |        |      |      |   |
|------|------|-----|-----|---|-----|---------|--------|--------|------|------|---|
| ATOM | 8178 | N   | LEU | C | 965 | 96.430  | 59.003 | 58.616 | 1.00 | 0.00 | N |
| ATOM | 8179 | CA  | LEU | C | 965 | 97.064  | 57.846 | 58.057 | 1.00 | 0.00 | C |
| ATOM | 8180 | C   | LEU | C | 965 | 96.048  | 56.745 | 57.995 | 1.00 | 0.00 | C |
| ATOM | 8181 | O   | LEU | C | 965 | 95.930  | 56.057 | 56.982 | 1.00 | 0.00 | O |
| ATOM | 8182 | CB  | LEU | C | 965 | 98.271  | 57.381 | 58.901 | 1.00 | 0.00 | C |
| ATOM | 8183 | CG  | LEU | C | 965 | 99.194  | 56.311 | 58.262 | 1.00 | 0.00 | C |
| ATOM | 8184 | CD1 | LEU | C | 965 | 100.344 | 55.957 | 59.219 | 1.00 | 0.00 | C |
| ATOM | 8185 | CD2 | LEU | C | 965 | 98.441  | 55.054 | 57.791 | 1.00 | 0.00 | C |
| ATOM | 8186 | N   | SER | C | 966 | 95.266  | 56.564 | 59.075 | 1.00 | 0.00 | N |
| ATOM | 8187 | CA  | SER | C | 966 | 94.331  | 55.475 | 59.121 | 1.00 | 0.00 | C |
| ATOM | 8188 | C   | SER | C | 966 | 93.295  | 55.650 | 58.060 | 1.00 | 0.00 | C |
| ATOM | 8189 | O   | SER | C | 966 | 92.984  | 54.720 | 57.320 | 1.00 | 0.00 | O |
| ATOM | 8190 | CB  | SER | C | 966 | 93.603  | 55.364 | 60.471 | 1.00 | 0.00 | C |
| ATOM | 8191 | OG  | SER | C | 966 | 92.759  | 56.488 | 60.671 | 1.00 | 0.00 | O |
| ATOM | 8192 | N   | THR | C | 967 | 92.753  | 56.870 | 57.940 | 1.00 | 0.00 | N |
| ATOM | 8193 | CA  | THR | C | 967 | 91.706  | 57.106 | 56.998 | 1.00 | 0.00 | C |
| ATOM | 8194 | C   | THR | C | 967 | 92.211  | 56.849 | 55.620 | 1.00 | 0.00 | C |
| ATOM | 8195 | O   | THR | C | 967 | 91.531  | 56.226 | 54.806 | 1.00 | 0.00 | O |
| ATOM | 8196 | CB  | THR | C | 967 | 91.182  | 58.514 | 57.069 | 1.00 | 0.00 | C |
| ATOM | 8197 | CG2 | THR | C | 967 | 92.312  | 59.517 | 56.804 | 1.00 | 0.00 | C |
| ATOM | 8198 | OG1 | THR | C | 967 | 90.150  | 58.684 | 56.116 | 1.00 | 0.00 | O |
| ATOM | 8199 | N   | ASN | C | 968 | 93.446  | 57.286 | 55.329 | 1.00 | 0.00 | N |
| ATOM | 8200 | CA  | ASN | C | 968 | 93.930  | 57.151 | 53.992 | 1.00 | 0.00 | C |
| ATOM | 8201 | C   | ASN | C | 968 | 93.952  | 55.708 | 53.604 | 1.00 | 0.00 | C |
| ATOM | 8202 | O   | ASN | C | 968 | 93.557  | 55.355 | 52.494 | 1.00 | 0.00 | O |
| ATOM | 8203 | CB  | ASN | C | 968 | 95.351  | 57.709 | 53.805 | 1.00 | 0.00 | C |
| ATOM | 8204 | CG  | ASN | C | 968 | 95.656  | 57.672 | 52.314 | 1.00 | 0.00 | C |
| ATOM | 8205 | ND2 | ASN | C | 968 | 95.416  | 58.816 | 51.613 | 1.00 | 0.00 | N |
| ATOM | 8206 | OD1 | ASN | C | 968 | 96.084  | 56.650 | 51.780 | 1.00 | 0.00 | O |
| ATOM | 8207 | N   | ILE | C | 969 | 94.400  | 54.828 | 54.512 | 1.00 | 0.00 | N |
| ATOM | 8208 | CA  | ILE | C | 969 | 94.498  | 53.456 | 54.124 | 1.00 | 0.00 | C |
| ATOM | 8209 | C   | ILE | C | 969 | 93.109  | 52.958 | 53.871 | 1.00 | 0.00 | C |
| ATOM | 8210 | O   | ILE | C | 969 | 92.874  | 52.153 | 52.976 | 1.00 | 0.00 | O |
| ATOM | 8211 | CB  | ILE | C | 969 | 95.122  | 52.559 | 55.133 | 1.00 | 0.00 | C |
| ATOM | 8212 | CG1 | ILE | C | 969 | 96.374  | 53.184 | 55.765 | 1.00 | 0.00 | C |
| ATOM | 8213 | CG2 | ILE | C | 969 | 95.528  | 51.353 | 54.286 | 1.00 | 0.00 | C |
| ATOM | 8214 | CD1 | ILE | C | 969 | 96.860  | 52.425 | 56.999 | 1.00 | 0.00 | C |
| ATOM | 8215 | N   | LEU | C | 970 | 92.134  | 53.413 | 54.675 | 1.00 | 0.00 | N |
| ATOM | 8216 | CA  | LEU | C | 970 | 90.807  | 52.929 | 54.463 | 1.00 | 0.00 | C |
| ATOM | 8217 | C   | LEU | C | 970 | 90.371  | 53.291 | 53.083 | 1.00 | 0.00 | C |
| ATOM | 8218 | O   | LEU | C | 970 | 89.833  | 52.449 | 52.369 | 1.00 | 0.00 | O |
| ATOM | 8219 | CB  | LEU | C | 970 | 89.776  | 53.510 | 55.443 | 1.00 | 0.00 | C |
| ATOM | 8220 | CG  | LEU | C | 970 | 88.340  | 53.083 | 55.091 | 1.00 | 0.00 | C |
| ATOM | 8221 | CD1 | LEU | C | 970 | 88.198  | 51.555 | 55.051 | 1.00 | 0.00 | C |

|      |      |               |        |        |        |      |      |   |
|------|------|---------------|--------|--------|--------|------|------|---|
| ATOM | 8222 | CD2 LEU C 970 | 87.331 | 53.744 | 56.034 | 1.00 | 0.00 | C |
| ATOM | 8223 | N LEU C 971   | 90.615 | 54.537 | 52.644 | 1.00 | 0.00 | N |
| ATOM | 8224 | CA LEU C 971  | 90.173 | 54.885 | 51.327 | 1.00 | 0.00 | C |
| ATOM | 8225 | C LEU C 971   | 90.882 | 54.023 | 50.337 | 1.00 | 0.00 | C |
| ATOM | 8226 | O LEU C 971   | 90.256 | 53.489 | 49.425 | 1.00 | 0.00 | O |
| ATOM | 8227 | CB LEU C 971  | 90.425 | 56.355 | 50.943 | 1.00 | 0.00 | C |
| ATOM | 8228 | CG LEU C 971  | 89.476 | 57.349 | 51.636 | 1.00 | 0.00 | C |
| ATOM | 8229 | CD1 LEU C 971 | 89.621 | 57.313 | 53.163 | 1.00 | 0.00 | C |
| ATOM | 8230 | CD2 LEU C 971 | 89.639 | 58.764 | 51.060 | 1.00 | 0.00 | C |
| ATOM | 8231 | N VAL C 972   | 92.203 | 53.822 | 50.503 | 1.00 | 0.00 | N |
| ATOM | 8232 | CA VAL C 972  | 92.909 | 53.041 | 49.528 | 1.00 | 0.00 | C |
| ATOM | 8233 | C VAL C 972   | 92.311 | 51.679 | 49.542 | 1.00 | 0.00 | C |
| ATOM | 8234 | O VAL C 972   | 92.237 | 51.001 | 48.518 | 1.00 | 0.00 | O |
| ATOM | 8235 | CB VAL C 972  | 94.396 | 52.930 | 49.757 | 1.00 | 0.00 | C |
| ATOM | 8236 | CG1 VAL C 972 | 94.690 | 52.005 | 50.947 | 1.00 | 0.00 | C |
| ATOM | 8237 | CG2 VAL C 972 | 95.043 | 52.450 | 48.448 | 1.00 | 0.00 | C |
| ATOM | 8238 | N ASN C 973   | 91.855 | 51.242 | 50.725 | 1.00 | 0.00 | N |
| ATOM | 8239 | CA ASN C 973  | 91.255 | 49.950 | 50.844 | 1.00 | 0.00 | C |
| ATOM | 8240 | C ASN C 973   | 90.066 | 49.892 | 49.934 | 1.00 | 0.00 | C |
| ATOM | 8241 | O ASN C 973   | 89.910 | 48.931 | 49.180 | 1.00 | 0.00 | O |
| ATOM | 8242 | CB ASN C 973  | 90.755 | 49.684 | 52.271 | 1.00 | 0.00 | C |
| ATOM | 8243 | CG ASN C 973  | 90.184 | 48.274 | 52.341 | 1.00 | 0.00 | C |
| ATOM | 8244 | ND2 ASN C 973 | 89.687 | 47.888 | 53.547 | 1.00 | 0.00 | N |
| ATOM | 8245 | OD1 ASN C 973 | 90.168 | 47.542 | 51.353 | 1.00 | 0.00 | O |
| ATOM | 8246 | N LEU C 974   | 89.196 | 50.924 | 49.977 | 1.00 | 0.00 | N |
| ATOM | 8247 | CA LEU C 974  | 87.990 | 50.974 | 49.192 | 1.00 | 0.00 | C |
| ATOM | 8248 | C LEU C 974   | 88.263 | 51.119 | 47.723 | 1.00 | 0.00 | C |
| ATOM | 8249 | O LEU C 974   | 87.628 | 50.452 | 46.913 | 1.00 | 0.00 | O |
| ATOM | 8250 | CB LEU C 974  | 87.049 | 52.125 | 49.588 | 1.00 | 0.00 | C |
| ATOM | 8251 | CG LEU C 974  | 86.274 | 51.896 | 50.903 | 1.00 | 0.00 | C |
| ATOM | 8252 | CD1 LEU C 974 | 87.214 | 51.697 | 52.098 | 1.00 | 0.00 | C |
| ATOM | 8253 | CD2 LEU C 974 | 85.246 | 53.014 | 51.137 | 1.00 | 0.00 | C |
| ATOM | 8254 | N LEU C 975   | 89.236 | 51.968 | 47.343 | 1.00 | 0.00 | N |
| ATOM | 8255 | CA LEU C 975  | 89.463 | 52.299 | 45.963 | 1.00 | 0.00 | C |
| ATOM | 8256 | C LEU C 975   | 89.784 | 51.094 | 45.141 | 1.00 | 0.00 | C |
| ATOM | 8257 | O LEU C 975   | 89.376 | 51.021 | 43.982 | 1.00 | 0.00 | O |
| ATOM | 8258 | CB LEU C 975  | 90.608 | 53.306 | 45.734 | 1.00 | 0.00 | C |
| ATOM | 8259 | CG LEU C 975  | 90.232 | 54.792 | 45.910 | 1.00 | 0.00 | C |
| ATOM | 8260 | CD1 LEU C 975 | 89.283 | 55.243 | 44.788 | 1.00 | 0.00 | C |
| ATOM | 8261 | CD2 LEU C 975 | 89.679 | 55.109 | 47.303 | 1.00 | 0.00 | C |
| ATOM | 8262 | N VAL C 976   | 90.505 | 50.111 | 45.702 | 1.00 | 0.00 | N |
| ATOM | 8263 | CA VAL C 976  | 90.942 | 49.023 | 44.877 | 1.00 | 0.00 | C |
| ATOM | 8264 | C VAL C 976   | 89.781 | 48.320 | 44.233 | 1.00 | 0.00 | C |
| ATOM | 8265 | O VAL C 976   | 89.859 | 47.957 | 43.061 | 1.00 | 0.00 | O |

|      |      |               |        |        |        |      |      |   |
|------|------|---------------|--------|--------|--------|------|------|---|
| ATOM | 8266 | CB VAL C 976  | 91.743 | 47.988 | 45.598 | 1.00 | 0.00 | C |
| ATOM | 8267 | CG1 VAL C 976 | 92.111 | 46.900 | 44.574 | 1.00 | 0.00 | C |
| ATOM | 8268 | CG2 VAL C 976 | 92.962 | 48.664 | 46.248 | 1.00 | 0.00 | C |
| ATOM | 8269 | N ALA C 977   | 88.668 | 48.093 | 44.959 | 1.00 | 0.00 | N |
| ATOM | 8270 | CA ALA C 977  | 87.572 | 47.394 | 44.343 | 1.00 | 0.00 | C |
| ATOM | 8271 | C ALA C 977   | 87.003 | 48.265 | 43.236 | 1.00 | 0.00 | C |
| ATOM | 8272 | O ALA C 977   | 87.145 | 49.485 | 43.310 | 1.00 | 0.00 | O |
| ATOM | 8273 | CB ALA C 977  | 86.435 | 47.061 | 45.323 | 1.00 | 0.00 | C |
| ATOM | 8274 | N MET C 978   | 86.301 | 48.167 | 43.128 | 1.00 | 0.00 | N |
| ATOM | 8275 | CA MET C 978  | 85.688 | 48.933 | 42.059 | 1.00 | 0.00 | C |
| ATOM | 8276 | C MET C 978   | 84.607 | 49.713 | 42.715 | 1.00 | 0.00 | C |
| ATOM | 8277 | O MET C 978   | 83.842 | 49.174 | 43.514 | 1.00 | 0.00 | O |
| ATOM | 8278 | CB MET C 978  | 85.018 | 48.089 | 40.963 | 1.00 | 0.00 | C |
| ATOM | 8279 | CG MET C 978  | 86.003 | 47.274 | 40.130 | 1.00 | 0.00 | C |
| ATOM | 8280 | SD MET C 978  | 86.777 | 45.907 | 41.039 | 1.00 | 0.00 | S |
| ATOM | 8281 | CE MET C 978  | 87.784 | 45.314 | 39.652 | 1.00 | 0.00 | C |
| ATOM | 8282 | N PHE C 979   | 84.507 | 51.014 | 42.396 | 1.00 | 0.00 | N |
| ATOM | 8283 | CA PHE C 979  | 83.522 | 51.769 | 43.101 | 1.00 | 0.00 | C |
| ATOM | 8284 | C PHE C 979   | 82.522 | 52.254 | 42.117 | 1.00 | 0.00 | C |
| ATOM | 8285 | O PHE C 979   | 82.864 | 52.644 | 41.002 | 1.00 | 0.00 | O |
| ATOM | 8286 | CB PHE C 979  | 84.091 | 53.000 | 43.825 | 1.00 | 0.00 | C |
| ATOM | 8287 | CG PHE C 979  | 83.029 | 53.517 | 44.725 | 1.00 | 0.00 | C |
| ATOM | 8288 | CD1 PHE C 979 | 82.889 | 53.004 | 45.995 | 1.00 | 0.00 | C |
| ATOM | 8289 | CD2 PHE C 979 | 82.168 | 54.506 | 44.309 | 1.00 | 0.00 | C |
| ATOM | 8290 | CE1 PHE C 979 | 81.911 | 53.471 | 46.837 | 1.00 | 0.00 | C |
| ATOM | 8291 | CE2 PHE C 979 | 81.184 | 54.976 | 45.148 | 1.00 | 0.00 | C |
| ATOM | 8292 | CZ PHE C 979  | 81.054 | 54.460 | 46.415 | 1.00 | 0.00 | C |
| ATOM | 8293 | N GLY C 980   | 81.238 | 52.220 | 42.520 | 1.00 | 0.00 | N |
| ATOM | 8294 | CA GLY C 980  | 80.201 | 52.705 | 41.668 | 1.00 | 0.00 | C |
| ATOM | 8295 | C GLY C 980   | 80.281 | 51.947 | 40.391 | 1.00 | 0.00 | C |
| ATOM | 8296 | O GLY C 980   | 80.378 | 50.720 | 40.377 | 1.00 | 0.00 | O |
| ATOM | 8297 | N TYR C 981   | 80.266 | 52.694 | 39.274 | 1.00 | 0.00 | N |
| ATOM | 8298 | CA TYR C 981  | 80.315 | 52.095 | 37.982 | 1.00 | 0.00 | C |
| ATOM | 8299 | C TYR C 981   | 81.584 | 52.573 | 37.364 | 1.00 | 0.00 | C |
| ATOM | 8300 | O TYR C 981   | 81.951 | 53.738 | 37.503 | 1.00 | 0.00 | O |
| ATOM | 8301 | CB TYR C 981  | 79.159 | 52.569 | 37.084 | 1.00 | 0.00 | C |
| ATOM | 8302 | CG TYR C 981  | 79.151 | 51.762 | 35.835 | 1.00 | 0.00 | C |
| ATOM | 8303 | CD1 TYR C 981 | 78.548 | 50.529 | 35.823 | 1.00 | 0.00 | C |
| ATOM | 8304 | CD2 TYR C 981 | 79.726 | 52.238 | 34.681 | 1.00 | 0.00 | C |
| ATOM | 8305 | CE1 TYR C 981 | 78.522 | 49.769 | 34.681 | 1.00 | 0.00 | C |
| ATOM | 8306 | CE2 TYR C 981 | 79.704 | 51.483 | 33.530 | 1.00 | 0.00 | C |
| ATOM | 8307 | CZ TYR C 981  | 79.102 | 50.248 | 33.531 | 1.00 | 0.00 | C |
| ATOM | 8308 | OH TYR C 981  | 79.076 | 49.469 | 32.355 | 1.00 | 0.00 | O |
| ATOM | 8309 | N THR C 982   | 82.308 | 51.668 | 36.681 | 1.00 | 0.00 | N |

|      |      |     |     |   |     |        |        |        |      |      |   |
|------|------|-----|-----|---|-----|--------|--------|--------|------|------|---|
| ATOM | 8310 | CA  | THR | C | 982 | 83.538 | 52.067 | 36.071 | 1.00 | 0.00 | C |
| ATOM | 8311 | C   | THR | C | 982 | 83.226 | 53.048 | 35.003 | 1.00 | 0.00 | C |
| ATOM | 8312 | O   | THR | C | 982 | 82.371 | 52.808 | 34.151 | 1.00 | 0.00 | O |
| ATOM | 8313 | CB  | THR | C | 982 | 84.282 | 50.936 | 35.425 | 1.00 | 0.00 | C |
| ATOM | 8314 | CG2 | THR | C | 982 | 85.494 | 51.487 | 34.662 | 1.00 | 0.00 | C |
| ATOM | 8315 | OG1 | THR | C | 982 | 84.691 | 50.000 | 36.404 | 1.00 | 0.00 | O |
| ATOM | 8316 | N   | VAL | C | 983 | 83.927 | 54.193 | 35.032 | 1.00 | 0.00 | N |
| ATOM | 8317 | CA  | VAL | C | 983 | 83.717 | 55.204 | 34.048 | 1.00 | 0.00 | C |
| ATOM | 8318 | C   | VAL | C | 983 | 85.061 | 55.682 | 33.618 | 1.00 | 0.00 | C |
| ATOM | 8319 | O   | VAL | C | 983 | 86.043 | 55.547 | 34.347 | 1.00 | 0.00 | O |
| ATOM | 8320 | CB  | VAL | C | 983 | 82.980 | 56.398 | 34.575 | 1.00 | 0.00 | C |
| ATOM | 8321 | CG1 | VAL | C | 983 | 81.565 | 55.958 | 34.990 | 1.00 | 0.00 | C |
| ATOM | 8322 | CG2 | VAL | C | 983 | 83.805 | 57.006 | 35.717 | 1.00 | 0.00 | C |
| ATOM | 8323 | N   | GLY | C | 984 | 85.133 | 56.236 | 32.394 | 1.00 | 0.00 | N |
| ATOM | 8324 | CA  | GLY | C | 984 | 86.364 | 56.764 | 31.892 | 1.00 | 0.00 | C |
| ATOM | 8325 | C   | GLY | C | 984 | 87.027 | 55.694 | 31.091 | 1.00 | 0.00 | C |
| ATOM | 8326 | O   | GLY | C | 984 | 86.889 | 54.507 | 31.378 | 1.00 | 0.00 | O |
| ATOM | 8327 | N   | THR | C | 985 | 87.776 | 56.110 | 30.053 | 1.00 | 0.00 | N |
| ATOM | 8328 | CA  | THR | C | 985 | 88.481 | 55.185 | 29.219 | 1.00 | 0.00 | C |
| ATOM | 8329 | C   | THR | C | 985 | 89.540 | 54.543 | 30.049 | 1.00 | 0.00 | C |
| ATOM | 8330 | O   | THR | C | 985 | 89.770 | 53.337 | 29.959 | 1.00 | 0.00 | O |
| ATOM | 8331 | CB  | THR | C | 985 | 89.174 | 55.841 | 28.065 | 1.00 | 0.00 | C |
| ATOM | 8332 | CG2 | THR | C | 985 | 89.933 | 54.764 | 27.276 | 1.00 | 0.00 | C |
| ATOM | 8333 | OG1 | THR | C | 985 | 88.225 | 56.493 | 27.232 | 1.00 | 0.00 | O |
| ATOM | 8334 | N   | VAL | C | 986 | 90.201 | 55.346 | 30.903 | 1.00 | 0.00 | N |
| ATOM | 8335 | CA  | VAL | C | 986 | 91.277 | 54.833 | 31.692 | 1.00 | 0.00 | C |
| ATOM | 8336 | C   | VAL | C | 986 | 90.744 | 53.722 | 32.527 | 1.00 | 0.00 | C |
| ATOM | 8337 | O   | VAL | C | 986 | 91.321 | 52.636 | 32.574 | 1.00 | 0.00 | O |
| ATOM | 8338 | CB  | VAL | C | 986 | 91.843 | 55.867 | 32.626 | 1.00 | 0.00 | C |
| ATOM | 8339 | CG1 | VAL | C | 986 | 92.903 | 55.198 | 33.517 | 1.00 | 0.00 | C |
| ATOM | 8340 | CG2 | VAL | C | 986 | 92.371 | 57.047 | 31.793 | 1.00 | 0.00 | C |
| ATOM | 8341 | N   | GLN | C | 987 | 89.602 | 53.952 | 33.196 | 1.00 | 0.00 | N |
| ATOM | 8342 | CA  | GLN | C | 987 | 89.093 | 52.911 | 34.034 | 1.00 | 0.00 | C |
| ATOM | 8343 | C   | GLN | C | 987 | 88.453 | 51.908 | 33.137 | 1.00 | 0.00 | C |
| ATOM | 8344 | O   | GLN | C | 987 | 87.675 | 52.255 | 32.247 | 1.00 | 0.00 | O |
| ATOM | 8345 | CB  | GLN | C | 987 | 88.065 | 53.423 | 35.058 | 1.00 | 0.00 | C |
| ATOM | 8346 | CG  | GLN | C | 987 | 87.795 | 52.462 | 36.216 | 1.00 | 0.00 | C |
| ATOM | 8347 | CD  | GLN | C | 987 | 86.857 | 53.175 | 37.178 | 1.00 | 0.00 | C |
| ATOM | 8348 | NE2 | GLN | C | 987 | 87.120 | 54.490 | 37.413 | 1.00 | 0.00 | N |
| ATOM | 8349 | OE1 | GLN | C | 987 | 85.922 | 52.583 | 37.713 | 1.00 | 0.00 | O |
| ATOM | 8350 | N   | GLU | C | 988 | 88.785 | 50.618 | 33.332 | 1.00 | 0.00 | N |
| ATOM | 8351 | CA  | GLU | C | 988 | 88.217 | 49.613 | 32.488 | 1.00 | 0.00 | C |
| ATOM | 8352 | C   | GLU | C | 988 | 87.860 | 48.451 | 33.354 | 1.00 | 0.00 | C |
| ATOM | 8353 | O   | GLU | C | 988 | 88.571 | 48.131 | 34.305 | 1.00 | 0.00 | O |

|      |      |     |     |   |     |        |        |        |      |      |   |
|------|------|-----|-----|---|-----|--------|--------|--------|------|------|---|
| ATOM | 8354 | CB  | GLU | C | 988 | 89.206 | 49.111 | 31.419 | 1.00 | 0.00 | C |
| ATOM | 8355 | CG  | GLU | C | 988 | 88.596 | 48.163 | 30.384 | 1.00 | 0.00 | C |
| ATOM | 8356 | CD  | GLU | C | 988 | 88.541 | 46.765 | 30.978 | 1.00 | 0.00 | C |
| ATOM | 8357 | OE1 | GLU | C | 988 | 89.247 | 46.516 | 31.993 | 1.00 | 0.00 | O |
| ATOM | 8358 | OE2 | GLU | C | 988 | 87.791 | 45.925 | 30.419 | 1.00 | 0.00 | O |
| ATOM | 8359 | N   | ASN | C | 989 | 86.722 | 47.794 | 33.058 | 1.00 | 0.00 | N |
| ATOM | 8360 | CA  | ASN | C | 989 | 86.360 | 46.640 | 33.823 | 1.00 | 0.00 | C |
| ATOM | 8361 | C   | ASN | C | 989 | 86.265 | 45.504 | 32.862 | 1.00 | 0.00 | C |
| ATOM | 8362 | O   | ASN | C | 989 | 85.666 | 45.628 | 31.796 | 1.00 | 0.00 | O |
| ATOM | 8363 | CB  | ASN | C | 989 | 85.004 | 46.755 | 34.540 | 1.00 | 0.00 | C |
| ATOM | 8364 | CG  | ASN | C | 989 | 84.910 | 45.612 | 35.543 | 1.00 | 0.00 | C |
| ATOM | 8365 | ND2 | ASN | C | 989 | 84.507 | 45.943 | 36.798 | 1.00 | 0.00 | N |
| ATOM | 8366 | OD1 | ASN | C | 989 | 85.195 | 44.459 | 35.223 | 1.00 | 0.00 | O |
| ATOM | 8367 | N   | ASN | C | 990 | 86.874 | 44.356 | 33.206 | 1.00 | 0.00 | N |
| ATOM | 8368 | CA  | ASN | C | 990 | 86.808 | 43.266 | 32.283 | 1.00 | 0.00 | C |
| ATOM | 8369 | C   | ASN | C | 990 | 85.860 | 42.251 | 32.827 | 1.00 | 0.00 | C |
| ATOM | 8370 | O   | ASN | C | 990 | 86.059 | 41.713 | 33.913 | 1.00 | 0.00 | O |
| ATOM | 8371 | CB  | ASN | C | 990 | 88.144 | 42.530 | 32.084 | 1.00 | 0.00 | C |
| ATOM | 8372 | CG  | ASN | C | 990 | 89.143 | 43.438 | 31.383 | 1.00 | 0.00 | C |
| ATOM | 8373 | ND2 | ASN | C | 990 | 88.996 | 43.579 | 30.037 | 1.00 | 0.00 | N |
| ATOM | 8374 | OD1 | ASN | C | 990 | 90.043 | 43.993 | 32.013 | 1.00 | 0.00 | O |
| ATOM | 8375 | N   | ASP | C | 991 | 84.776 | 41.985 | 32.076 | 1.00 | 0.00 | N |
| ATOM | 8376 | CA  | ASP | C | 991 | 83.861 | 40.962 | 32.477 | 1.00 | 0.00 | C |
| ATOM | 8377 | C   | ASP | C | 991 | 84.584 | 39.664 | 32.326 | 1.00 | 0.00 | C |
| ATOM | 8378 | O   | ASP | C | 991 | 84.393 | 38.732 | 33.106 | 1.00 | 0.00 | O |
| ATOM | 8379 | CB  | ASP | C | 991 | 82.583 | 40.914 | 31.623 | 1.00 | 0.00 | C |
| ATOM | 8380 | CG  | ASP | C | 991 | 82.961 | 40.613 | 30.180 | 1.00 | 0.00 | C |
| ATOM | 8381 | OD1 | ASP | C | 991 | 84.019 | 41.120 | 29.721 | 1.00 | 0.00 | O |
| ATOM | 8382 | OD2 | ASP | C | 991 | 82.191 | 39.868 | 29.517 | 1.00 | 0.00 | O |
| ATOM | 8383 | N   | GLN | C | 992 | 85.446 | 39.582 | 31.293 | 1.00 | 0.00 | N |
| ATOM | 8384 | CA  | GLN | C | 992 | 86.169 | 38.377 | 31.028 | 1.00 | 0.00 | C |
| ATOM | 8385 | C   | GLN | C | 992 | 87.130 | 38.079 | 32.142 | 1.00 | 0.00 | C |
| ATOM | 8386 | O   | GLN | C | 992 | 87.262 | 36.924 | 32.542 | 1.00 | 0.00 | O |
| ATOM | 8387 | CB  | GLN | C | 992 | 86.902 | 38.380 | 29.671 | 1.00 | 0.00 | C |
| ATOM | 8388 | CG  | GLN | C | 992 | 87.974 | 39.452 | 29.477 | 1.00 | 0.00 | C |
| ATOM | 8389 | CD  | GLN | C | 992 | 88.521 | 39.278 | 28.063 | 1.00 | 0.00 | C |
| ATOM | 8390 | NE2 | GLN | C | 992 | 87.627 | 39.399 | 27.044 | 1.00 | 0.00 | N |
| ATOM | 8391 | OE1 | GLN | C | 992 | 89.715 | 39.038 | 27.868 | 1.00 | 0.00 | O |
| ATOM | 8392 | N   | VAL | C | 993 | 87.799 | 39.107 | 32.708 | 1.00 | 0.00 | N |
| ATOM | 8393 | CA  | VAL | C | 993 | 88.747 | 38.859 | 33.761 | 1.00 | 0.00 | C |
| ATOM | 8394 | C   | VAL | C | 993 | 88.018 | 38.188 | 34.864 | 1.00 | 0.00 | C |
| ATOM | 8395 | O   | VAL | C | 993 | 88.500 | 37.220 | 35.453 | 1.00 | 0.00 | O |
| ATOM | 8396 | CB  | VAL | C | 993 | 89.327 | 40.100 | 34.384 | 1.00 | 0.00 | C |
| ATOM | 8397 | CG1 | VAL | C | 993 | 90.121 | 39.683 | 35.633 | 1.00 | 0.00 | C |

|      |      |               |        |        |        |      |      |     |
|------|------|---------------|--------|--------|--------|------|------|-----|
| ATOM | 8398 | CG2 VAL C 993 | 90.187 | 40.847 | 33.354 | 1.00 | 0.00 | C   |
| ATOM | 8399 | N TRP C 994   | 86.817 | 38.688 | 35.180 | 1.00 | 0.00 | N   |
| ATOM | 8400 | CA TRP C 994  | 86.077 | 38.048 | 36.215 | 1.00 | 0.00 | C   |
| ATOM | 8401 | C TRP C 994   | 85.859 | 36.630 | 35.874 | 1.00 | 0.00 | C   |
| ATOM | 8402 | O TRP C 994   | 86.083 | 35.760 | 36.712 | 1.00 | 0.00 | O   |
| ATOM | 8403 | CB TRP C 994  | 84.641 | 38.485 | 36.328 | 1.00 | 0.00 | C   |
| ATOM | 8404 | CG TRP C 994  | 83.789 | 37.314 | 36.769 | 1.00 | 0.00 | C   |
| ATOM | 8405 | CD1 TRP C 994 | 83.783 | 36.564 | 37.919 | 1.00 | 0.00 | C   |
| ATOM | 8406 | CD2 TRP C 994 | 82.612 | 36.921 | 36.039 | 1.00 | 0.00 | C   |
| ATOM | 8407 | CE2 TRP C 994 | 81.945 | 35.962 | 36.801 | 1.00 | 0.00 | C   |
| ATOM | 8408 | CE3 TRP C 994 | 82.109 | 37.357 | 34.847 | 1.00 | 0.00 | C   |
| ATOM | 8409 | NE1 TRP C 994 | 82.674 | 35.753 | 37.947 | 1.00 | 0.00 | N   |
| ATOM | 8410 | CZ2 TRP C 994 | 80.764 | 35.422 | 36.378 | 1.00 | 0.00 | C   |
| ATOM | 8411 | CZ3 TRP C 994 | 80.936 | 36.787 | 34.412 | 1.00 | 0.00 | C   |
| ATOM | 8412 | CH2 TRP C 994 | 80.274 | 35.838 | 35.165 | 1.00 | 0.00 | C   |
| ATOM | 8413 | N LYS C 995   | 85.386 | 36.383 | 34.641 | 1.00 | 0.00 | N   |
| ATOM | 8414 | CA LYS C 995  | 84.964 | 35.063 | 34.290 | 1.00 | 0.00 | C   |
| ATOM | 8415 | C LYS C 995   | 86.103 | 34.141 | 34.508 | 1.00 | 0.00 | C   |
| ATOM | 8416 | O LYS C 995   | 85.902 | 33.012 | 34.953 | 1.00 | 0.00 | O   |
| ATOM | 8417 | CB LYS C 995  | 84.555 | 34.900 | 32.816 | 1.00 | 0.00 | C   |
| ATOM | 8418 | CG LYS C 995  | 83.085 | 35.192 | 32.505 | 1.00 | 0.00 | C   |
| ATOM | 8419 | CD LYS C 995  | 82.097 | 34.187 | 33.108 | 1.00 | 0.00 | C   |
| ATOM | 8420 | CE LYS C 995  | 80.662 | 34.402 | 32.619 | 1.00 | 0.00 | C   |
| ATOM | 8421 | NZ LYS C 995  | 79.773 | 33.343 | 33.141 | 1.00 | 0.00 | N1+ |
| ATOM | 8422 | N PHE C 996   | 87.325 | 34.601 | 34.207 | 1.00 | 0.00 | N   |
| ATOM | 8423 | CA PHE C 996  | 88.459 | 33.755 | 34.382 | 1.00 | 0.00 | C   |
| ATOM | 8424 | C PHE C 996   | 88.528 | 33.358 | 35.822 | 1.00 | 0.00 | C   |
| ATOM | 8425 | O PHE C 996   | 88.653 | 32.177 | 36.136 | 1.00 | 0.00 | O   |
| ATOM | 8426 | CB PHE C 996  | 89.787 | 34.459 | 34.036 | 1.00 | 0.00 | C   |
| ATOM | 8427 | CG PHE C 996  | 90.894 | 33.483 | 34.256 | 1.00 | 0.00 | C   |
| ATOM | 8428 | CD1 PHE C 996 | 91.267 | 32.609 | 33.262 | 1.00 | 0.00 | C   |
| ATOM | 8429 | CD2 PHE C 996 | 91.557 | 33.438 | 35.460 | 1.00 | 0.00 | C   |
| ATOM | 8430 | CE1 PHE C 996 | 92.284 | 31.707 | 33.462 | 1.00 | 0.00 | C   |
| ATOM | 8431 | CE2 PHE C 996 | 92.577 | 32.540 | 35.665 | 1.00 | 0.00 | C   |
| ATOM | 8432 | CZ PHE C 996  | 92.945 | 31.671 | 34.666 | 1.00 | 0.00 | C   |
| ATOM | 8433 | N GLN C 997   | 88.430 | 34.337 | 36.743 | 1.00 | 0.00 | N   |
| ATOM | 8434 | CA GLN C 997  | 88.535 | 34.018 | 38.139 | 1.00 | 0.00 | C   |
| ATOM | 8435 | C GLN C 997   | 87.392 | 33.152 | 38.557 | 1.00 | 0.00 | C   |
| ATOM | 8436 | O GLN C 997   | 87.557 | 32.233 | 39.354 | 1.00 | 0.00 | O   |
| ATOM | 8437 | CB GLN C 997  | 88.545 | 35.230 | 39.087 | 1.00 | 0.00 | C   |
| ATOM | 8438 | CG GLN C 997  | 88.606 | 34.790 | 40.555 | 1.00 | 0.00 | C   |
| ATOM | 8439 | CD GLN C 997  | 88.948 | 35.982 | 41.427 | 1.00 | 0.00 | C   |
| ATOM | 8440 | NE2 GLN C 997 | 89.696 | 36.959 | 40.852 | 1.00 | 0.00 | N   |
| ATOM | 8441 | OE1 GLN C 997 | 88.589 | 36.035 | 42.603 | 1.00 | 0.00 | O   |

|      |      |     |     |   |      |        |        |        |      |      |   |
|------|------|-----|-----|---|------|--------|--------|--------|------|------|---|
| ATOM | 8442 | N   | ARG | C | 998  | 86.193 | 33.437 | 38.035 | 1.00 | 0.00 | N |
| ATOM | 8443 | CA  | ARG | C | 998  | 85.021 | 32.697 | 38.396 | 1.00 | 0.00 | C |
| ATOM | 8444 | C   | ARG | C | 998  | 85.201 | 31.260 | 38.009 | 1.00 | 0.00 | C |
| ATOM | 8445 | O   | ARG | C | 998  | 84.916 | 30.358 | 38.792 | 1.00 | 0.00 | O |
| ATOM | 8446 | CB  | ARG | C | 998  | 83.805 | 33.229 | 37.626 | 1.00 | 0.00 | C |
| ATOM | 8447 | CG  | ARG | C | 998  | 82.582 | 32.324 | 37.664 | 1.00 | 0.00 | C |
| ATOM | 8448 | CD  | ARG | C | 998  | 82.438 | 31.448 | 36.420 | 1.00 | 0.00 | C |
| ATOM | 8449 | NE  | ARG | C | 998  | 81.200 | 30.640 | 36.607 | 1.00 | 0.00 | N |
| ATOM | 8450 | CZ  | ARG | C | 998  | 79.993 | 31.201 | 36.310 | 1.00 | 0.00 | C |
| ATOM | 8451 | NH1 | ARG | C | 998  | 79.941 | 32.475 | 35.826 | 1.00 | 0.00 | N |
| ATOM | 8452 | NH2 | ARG | C | 998  | 78.839 | 30.501 | 36.513 | 1.00 | 0.00 | N |
| ATOM | 8453 | N   | TYR | C | 999  | 85.694 | 31.035 | 36.777 | 1.00 | 0.00 | N |
| ATOM | 8454 | CA  | TYR | C | 999  | 85.905 | 29.739 | 36.205 | 1.00 | 0.00 | C |
| ATOM | 8455 | C   | TYR | C | 999  | 86.950 | 29.022 | 36.995 | 1.00 | 0.00 | C |
| ATOM | 8456 | O   | TYR | C | 999  | 86.827 | 27.834 | 37.281 | 1.00 | 0.00 | O |
| ATOM | 8457 | CB  | TYR | C | 999  | 86.398 | 29.852 | 34.749 | 1.00 | 0.00 | C |
| ATOM | 8458 | CG  | TYR | C | 999  | 86.691 | 28.500 | 34.204 | 1.00 | 0.00 | C |
| ATOM | 8459 | CD1 | TYR | C | 999  | 85.663 | 27.635 | 33.929 | 1.00 | 0.00 | C |
| ATOM | 8460 | CD2 | TYR | C | 999  | 87.978 | 28.095 | 33.935 | 1.00 | 0.00 | C |
| ATOM | 8461 | CE1 | TYR | C | 999  | 85.896 | 26.385 | 33.416 | 1.00 | 0.00 | C |
| ATOM | 8462 | CE2 | TYR | C | 999  | 88.223 | 26.845 | 33.417 | 1.00 | 0.00 | C |
| ATOM | 8463 | CZ  | TYR | C | 999  | 87.183 | 25.985 | 33.162 | 1.00 | 0.00 | C |
| ATOM | 8464 | OH  | TYR | C | 999  | 87.417 | 24.702 | 32.633 | 1.00 | 0.00 | O |
| ATOM | 8465 | N   | PHE | C | 1000 | 88.017 | 29.742 | 37.368 | 1.00 | 0.00 | N |
| ATOM | 8466 | CA  | PHE | C | 1000 | 89.103 | 29.147 | 38.083 | 1.00 | 0.00 | C |
| ATOM | 8467 | C   | PHE | C | 1000 | 88.578 | 28.620 | 39.377 | 1.00 | 0.00 | C |
| ATOM | 8468 | O   | PHE | C | 1000 | 88.870 | 27.486 | 39.752 | 1.00 | 0.00 | O |
| ATOM | 8469 | CB  | PHE | C | 1000 | 90.209 | 30.171 | 38.398 | 1.00 | 0.00 | C |
| ATOM | 8470 | CG  | PHE | C | 1000 | 91.301 | 29.483 | 39.139 | 1.00 | 0.00 | C |
| ATOM | 8471 | CD1 | PHE | C | 1000 | 92.249 | 28.747 | 38.461 | 1.00 | 0.00 | C |
| ATOM | 8472 | CD2 | PHE | C | 1000 | 91.382 | 29.580 | 40.508 | 1.00 | 0.00 | C |
| ATOM | 8473 | CE1 | PHE | C | 1000 | 93.260 | 28.117 | 39.145 | 1.00 | 0.00 | C |
| ATOM | 8474 | CE2 | PHE | C | 1000 | 92.393 | 28.949 | 41.195 | 1.00 | 0.00 | C |
| ATOM | 8475 | CZ  | PHE | C | 1000 | 93.333 | 28.216 | 40.513 | 1.00 | 0.00 | C |
| ATOM | 8476 | N   | LEU | C | 1001 | 87.769 | 29.429 | 40.086 | 1.00 | 0.00 | N |
| ATOM | 8477 | CA  | LEU | C | 1001 | 87.265 | 29.026 | 41.363 | 1.00 | 0.00 | C |
| ATOM | 8478 | C   | LEU | C | 1001 | 86.374 | 27.827 | 41.225 | 1.00 | 0.00 | C |
| ATOM | 8479 | O   | LEU | C | 1001 | 86.479 | 26.888 | 42.012 | 1.00 | 0.00 | O |
| ATOM | 8480 | CB  | LEU | C | 1001 | 86.451 | 30.115 | 42.081 | 1.00 | 0.00 | C |
| ATOM | 8481 | CG  | LEU | C | 1001 | 87.297 | 31.318 | 42.526 | 1.00 | 0.00 | C |
| ATOM | 8482 | CD1 | LEU | C | 1001 | 86.474 | 32.257 | 43.416 | 1.00 | 0.00 | C |
| ATOM | 8483 | CD2 | LEU | C | 1001 | 88.605 | 30.869 | 43.192 | 1.00 | 0.00 | C |
| ATOM | 8484 | N   | VAL | C | 1002 | 85.480 | 27.818 | 40.221 | 1.00 | 0.00 | N |
| ATOM | 8485 | CA  | VAL | C | 1002 | 84.565 | 26.721 | 40.102 | 1.00 | 0.00 | C |

|      |      |     |           |        |        |        |      |      |   |
|------|------|-----|-----------|--------|--------|--------|------|------|---|
| ATOM | 8486 | C   | VAL C1002 | 85.334 | 25.472 | 39.814 | 1.00 | 0.00 | C |
| ATOM | 8487 | O   | VAL C1002 | 85.026 | 24.413 | 40.357 | 1.00 | 0.00 | O |
| ATOM | 8488 | CB  | VAL C1002 | 83.542 | 26.903 | 39.014 | 1.00 | 0.00 | C |
| ATOM | 8489 | CG1 | VAL C1002 | 82.692 | 28.144 | 39.348 | 1.00 | 0.00 | C |
| ATOM | 8490 | CG2 | VAL C1002 | 84.252 | 26.971 | 37.653 | 1.00 | 0.00 | C |
| ATOM | 8491 | N   | GLN C1003 | 86.363 | 25.559 | 38.945 | 1.00 | 0.00 | N |
| ATOM | 8492 | CA  | GLN C1003 | 87.121 | 24.390 | 38.603 | 1.00 | 0.00 | C |
| ATOM | 8493 | C   | GLN C1003 | 87.809 | 23.877 | 39.824 | 1.00 | 0.00 | C |
| ATOM | 8494 | O   | GLN C1003 | 87.836 | 22.675 | 40.070 | 1.00 | 0.00 | O |
| ATOM | 8495 | CB  | GLN C1003 | 88.268 | 24.642 | 37.619 | 1.00 | 0.00 | C |
| ATOM | 8496 | CG  | GLN C1003 | 87.858 | 24.955 | 36.190 | 1.00 | 0.00 | C |
| ATOM | 8497 | CD  | GLN C1003 | 89.150 | 24.867 | 35.401 | 1.00 | 0.00 | C |
| ATOM | 8498 | NE2 | GLN C1003 | 89.982 | 25.939 | 35.484 | 1.00 | 0.00 | N |
| ATOM | 8499 | OE1 | GLN C1003 | 89.427 | 23.855 | 34.762 | 1.00 | 0.00 | O |
| ATOM | 8500 | N   | GLU C1004 | 88.385 | 24.790 | 40.628 | 1.00 | 0.00 | N |
| ATOM | 8501 | CA  | GLU C1004 | 89.123 | 24.382 | 41.787 | 1.00 | 0.00 | C |
| ATOM | 8502 | C   | GLU C1004 | 88.164 | 23.683 | 42.697 | 1.00 | 0.00 | C |
| ATOM | 8503 | O   | GLU C1004 | 88.489 | 22.675 | 43.321 | 1.00 | 0.00 | O |
| ATOM | 8504 | CB  | GLU C1004 | 89.718 | 25.583 | 42.544 | 1.00 | 0.00 | C |
| ATOM | 8505 | CG  | GLU C1004 | 90.526 | 25.204 | 43.784 | 1.00 | 0.00 | C |
| ATOM | 8506 | CD  | GLU C1004 | 91.039 | 26.496 | 44.406 | 1.00 | 0.00 | C |
| ATOM | 8507 | OE1 | GLU C1004 | 91.459 | 27.396 | 43.630 | 1.00 | 0.00 | O |
| ATOM | 8508 | OE2 | GLU C1004 | 91.012 | 26.605 | 45.661 | 1.00 | 0.00 | O |
| ATOM | 8509 | N   | TYR C1005 | 86.940 | 24.226 | 42.759 | 1.00 | 0.00 | N |
| ATOM | 8510 | CA  | TYR C1005 | 85.839 | 23.740 | 43.534 | 1.00 | 0.00 | C |
| ATOM | 8511 | C   | TYR C1005 | 85.504 | 22.356 | 43.067 | 1.00 | 0.00 | C |
| ATOM | 8512 | O   | TYR C1005 | 85.362 | 21.439 | 43.872 | 1.00 | 0.00 | O |
| ATOM | 8513 | CB  | TYR C1005 | 84.640 | 24.682 | 43.278 | 1.00 | 0.00 | C |
| ATOM | 8514 | CG  | TYR C1005 | 83.304 | 24.099 | 43.594 | 1.00 | 0.00 | C |
| ATOM | 8515 | CD1 | TYR C1005 | 82.710 | 23.230 | 42.706 | 1.00 | 0.00 | C |
| ATOM | 8516 | CD2 | TYR C1005 | 82.618 | 24.450 | 44.734 | 1.00 | 0.00 | C |
| ATOM | 8517 | CE1 | TYR C1005 | 81.471 | 22.695 | 42.952 | 1.00 | 0.00 | C |
| ATOM | 8518 | CE2 | TYR C1005 | 81.376 | 23.916 | 44.988 | 1.00 | 0.00 | C |
| ATOM | 8519 | CZ  | TYR C1005 | 80.801 | 23.040 | 44.097 | 1.00 | 0.00 | C |
| ATOM | 8520 | OH  | TYR C1005 | 79.525 | 22.497 | 44.361 | 1.00 | 0.00 | O |
| ATOM | 8521 | N   | CYS C1006 | 85.399 | 22.176 | 41.740 | 1.00 | 0.00 | N |
| ATOM | 8522 | CA  | CYS C1006 | 85.031 | 20.903 | 41.197 | 1.00 | 0.00 | C |
| ATOM | 8523 | C   | CYS C1006 | 86.091 | 19.902 | 41.528 | 1.00 | 0.00 | C |
| ATOM | 8524 | O   | CYS C1006 | 85.794 | 18.782 | 41.938 | 1.00 | 0.00 | O |
| ATOM | 8525 | CB  | CYS C1006 | 84.870 | 20.931 | 39.668 | 1.00 | 0.00 | C |
| ATOM | 8526 | SG  | CYS C1006 | 83.510 | 22.014 | 39.134 | 1.00 | 0.00 | S |
| ATOM | 8527 | N   | SER C1007 | 87.369 | 20.286 | 41.361 | 1.00 | 0.00 | N |
| ATOM | 8528 | CA  | SER C1007 | 88.425 | 19.349 | 41.597 | 1.00 | 0.00 | C |
| ATOM | 8529 | C   | SER C1007 | 88.398 | 18.932 | 43.032 | 1.00 | 0.00 | C |



|        |      |     |           |         |        |        |      |      |      |
|--------|------|-----|-----------|---------|--------|--------|------|------|------|
| ATOM   | 8530 | O   | SER C1007 | 88.406  | 17.740 | 43.338 | 1.00 | 0.00 | O    |
| ATOM   | 8531 | CB  | SER C1007 | 89.817  | 19.946 | 41.315 | 1.00 | 0.00 | C    |
| ATOM   | 8532 | OG  | SER C1007 | 90.827  | 18.979 | 41.567 | 1.00 | 0.00 | O    |
| ATOM   | 8533 | N   | ARG C1008 | 88.355  | 19.911 | 43.954 | 1.00 | 0.00 | N    |
| ATOM   | 8534 | CA  | ARG C1008 | 88.409  | 19.594 | 45.354 | 1.00 | 0.00 | C    |
| ATOM   | 8535 | C   | ARG C1008 | 87.205  | 18.806 | 45.743 | 1.00 | 0.00 | C    |
| ATOM   | 8536 | O   | ARG C1008 | 87.311  | 17.786 | 46.422 | 1.00 | 0.00 | O    |
| ATOM   | 8537 | CB  | ARG C1008 | 88.454  | 20.847 | 46.245 | 1.00 | 0.00 | C    |
| ATOM   | 8538 | CG  | ARG C1008 | 88.514  | 20.532 | 47.742 | 1.00 | 0.00 | C    |
| ATOM   | 8539 | CD  | ARG C1008 | 88.619  | 21.783 | 48.619 | 1.00 | 0.00 | C    |
| ATOM   | 8540 | NE  | ARG C1008 | 88.613  | 21.338 | 50.043 | 1.00 | 0.00 | N    |
| ATOM   | 8541 | CZ  | ARG C1008 | 87.451  | 21.360 | 50.755 | 1.00 | 0.00 | C    |
| ATOM   | 8542 | NH1 | ARG C1008 | 86.308  | 21.833 | 50.184 | 1.00 | 0.00 | N    |
| ATOM   | 8543 | NH2 | ARG C1008 | 87.432  | 20.913 | 52.048 | 1.00 | 0.00 | N    |
| ATOM   | 8544 | N   | LEU C1009 | 86.020  | 19.257 | 45.298 | 1.00 | 0.00 | N    |
| ATOM   | 8545 | CA  | LEU C1009 | 84.790  | 18.621 | 45.660 | 1.00 | 0.00 | C    |
| ATOM   | 8546 | C   | LEU C1009 | 84.697  | 17.262 | 45.051 | 1.00 | 0.00 | C    |
| ATOM   | 8547 | O   | LEU C1009 | 83.968  | 16.411 | 45.560 | 1.00 | 0.00 | O    |
| ATOM   | 8548 | CB  | LEU C1009 | 83.525  | 19.421 | 45.318 | 1.00 | 0.00 | C    |
| ATOM   | 8549 | CG  | LEU C1009 | 83.381  | 20.667 | 46.209 | 1.00 | 0.00 | C    |
| ATOM   | 8550 | CD1 | LEU C1009 | 81.969  | 21.256 | 46.115 | 1.00 | 0.00 | C    |
| ATOM   | 8551 | CD2 | LEU C1009 | 83.806  | 20.372 | 47.657 | 1.00 | 0.00 | C    |
| ATOM   | 8552 | N   | ASN C1010 | 85.363  | 17.039 | 43.904 | 1.00 | 0.00 | N    |
| ATOM   | 8553 | CA  | ASN C1010 | 85.263  | 15.736 | 43.321 | 1.00 | 0.00 | C    |
| ATOM   | 8554 | C   | ASN C1010 | 86.301  | 14.830 | 43.972 | 1.00 | 0.00 | C    |
| ATOM   | 8555 | O   | ASN C1010 | 86.919  | 15.273 | 44.977 | 1.00 | 0.00 | O    |
| ATOM   | 8556 | CB  | ASN C1010 | 85.495  | 15.715 | 41.798 | 1.00 | 0.00 | C    |
| ATOM   | 8557 | CG  | ASN C1010 | 84.874  | 14.429 | 41.261 | 1.00 | 0.00 | C    |
| ATOM   | 8558 | ND2 | ASN C1010 | 84.849  | 14.282 | 39.910 | 1.00 | 0.00 | N    |
| ATOM   | 8559 | OD1 | ASN C1010 | 84.409  | 13.582 | 42.023 | 1.00 | 0.00 | O    |
| ATOM   | 8560 | OXT | ASN C1010 | 86.482  | 13.681 | 43.486 | 1.00 | 0.00 | OI-  |
| HETATM | 8561 | CA  | CA1 C1011 | 91.371  | 24.513 | 52.372 | 1.00 | 0.00 | CA2+ |
| TER    | 8562 | CA1 | C1011     |         |        |        |      |      |      |
| ATOM   | 8563 | N   | GLN D 671 | 103.052 | 56.585 | 26.782 | 1.00 | 0.00 | N1+  |
| ATOM   | 8564 | CA  | GLN D 671 | 103.610 | 55.608 | 25.883 | 1.00 | 0.00 | C    |
| ATOM   | 8565 | C   | GLN D 671 | 104.502 | 54.656 | 26.620 | 1.00 | 0.00 | C    |
| ATOM   | 8566 | O   | GLN D 671 | 105.136 | 54.974 | 27.624 | 1.00 | 0.00 | O    |
| ATOM   | 8567 | CB  | GLN D 671 | 104.451 | 56.257 | 24.771 | 1.00 | 0.00 | C    |
| ATOM   | 8568 | CG  | GLN D 671 | 105.671 | 56.996 | 25.321 | 1.00 | 0.00 | C    |
| ATOM   | 8569 | CD  | GLN D 671 | 106.378 | 57.701 | 24.171 | 1.00 | 0.00 | C    |
| ATOM   | 8570 | NE2 | GLN D 671 | 107.388 | 58.545 | 24.510 | 1.00 | 0.00 | N    |
| ATOM   | 8571 | OE1 | GLN D 671 | 106.036 | 57.513 | 23.004 | 1.00 | 0.00 | O    |
| ATOM   | 8572 | N   | PRO D 672 | 104.502 | 53.447 | 26.116 | 1.00 | 0.00 | N    |
| ATOM   | 8573 | CA  | PRO D 672 | 105.300 | 52.397 | 26.690 | 1.00 | 0.00 | C    |

|      |      |     |           |         |        |        |      |      |   |
|------|------|-----|-----------|---------|--------|--------|------|------|---|
| ATOM | 8574 | C   | PRO D 672 | 106.777 | 52.576 | 26.523 | 1.00 | 0.00 | C |
| ATOM | 8575 | O   | PRO D 672 | 107.523 | 51.985 | 27.301 | 1.00 | 0.00 | O |
| ATOM | 8576 | CB  | PRO D 672 | 104.776 | 51.099 | 26.082 | 1.00 | 0.00 | C |
| ATOM | 8577 | CG  | PRO D 672 | 103.305 | 51.414 | 25.767 | 1.00 | 0.00 | C |
| ATOM | 8578 | CD  | PRO D 672 | 103.293 | 52.928 | 25.496 | 1.00 | 0.00 | C |
| ATOM | 8579 | N   | GLY D 673 | 107.234 | 53.342 | 25.512 | 1.00 | 0.00 | N |
| ATOM | 8580 | CA  | GLY D 673 | 108.651 | 53.436 | 25.310 | 1.00 | 0.00 | C |
| ATOM | 8581 | C   | GLY D 673 | 109.305 | 54.101 | 26.481 | 1.00 | 0.00 | C |
| ATOM | 8582 | O   | GLY D 673 | 110.263 | 53.580 | 27.049 | 1.00 | 0.00 | O |
| ATOM | 8583 | N   | VAL D 674 | 108.779 | 55.269 | 26.887 | 1.00 | 0.00 | N |
| ATOM | 8584 | CA  | VAL D 674 | 109.350 | 55.999 | 27.975 | 1.00 | 0.00 | C |
| ATOM | 8585 | C   | VAL D 674 | 109.176 | 55.195 | 29.215 | 1.00 | 0.00 | C |
| ATOM | 8586 | O   | VAL D 674 | 110.056 | 55.163 | 30.072 | 1.00 | 0.00 | O |
| ATOM | 8587 | CB  | VAL D 674 | 108.688 | 57.329 | 28.189 | 1.00 | 0.00 | C |
| ATOM | 8588 | CG1 | VAL D 674 | 107.198 | 57.092 | 28.481 | 1.00 | 0.00 | C |
| ATOM | 8589 | CG2 | VAL D 674 | 109.430 | 58.071 | 29.317 | 1.00 | 0.00 | C |
| ATOM | 8590 | N   | GLN D 675 | 108.020 | 54.518 | 29.342 | 1.00 | 0.00 | N |
| ATOM | 8591 | CA  | GLN D 675 | 107.742 | 53.754 | 30.521 | 1.00 | 0.00 | C |
| ATOM | 8592 | C   | GLN D 675 | 108.755 | 52.659 | 30.631 | 1.00 | 0.00 | C |
| ATOM | 8593 | O   | GLN D 675 | 109.238 | 52.362 | 31.722 | 1.00 | 0.00 | O |
| ATOM | 8594 | CB  | GLN D 675 | 106.348 | 53.109 | 30.505 | 1.00 | 0.00 | C |
| ATOM | 8595 | CG  | GLN D 675 | 105.208 | 54.134 | 30.527 | 1.00 | 0.00 | C |
| ATOM | 8596 | CD  | GLN D 675 | 105.237 | 54.846 | 31.870 | 1.00 | 0.00 | C |
| ATOM | 8597 | NE2 | GLN D 675 | 104.636 | 56.066 | 31.923 | 1.00 | 0.00 | N |
| ATOM | 8598 | OE1 | GLN D 675 | 105.780 | 54.336 | 32.849 | 1.00 | 0.00 | O |
| ATOM | 8599 | N   | ASN D 676 | 109.109 | 52.035 | 29.494 | 1.00 | 0.00 | N |
| ATOM | 8600 | CA  | ASN D 676 | 110.071 | 50.971 | 29.506 | 1.00 | 0.00 | C |
| ATOM | 8601 | C   | ASN D 676 | 111.352 | 51.561 | 30.000 | 1.00 | 0.00 | C |
| ATOM | 8602 | O   | ASN D 676 | 112.106 | 50.925 | 30.732 | 1.00 | 0.00 | O |
| ATOM | 8603 | CB  | ASN D 676 | 110.322 | 50.379 | 28.108 | 1.00 | 0.00 | C |
| ATOM | 8604 | CG  | ASN D 676 | 111.187 | 49.135 | 28.267 | 1.00 | 0.00 | C |
| ATOM | 8605 | ND2 | ASN D 676 | 110.725 | 47.998 | 27.684 | 1.00 | 0.00 | N |
| ATOM | 8606 | OD1 | ASN D 676 | 112.242 | 49.174 | 28.897 | 1.00 | 0.00 | O |
| ATOM | 8607 | N   | PHE D 677 | 111.605 | 52.819 | 29.607 | 1.00 | 0.00 | N |
| ATOM | 8608 | CA  | PHE D 677 | 112.779 | 53.541 | 29.993 | 1.00 | 0.00 | C |
| ATOM | 8609 | C   | PHE D 677 | 112.779 | 53.659 | 31.483 | 1.00 | 0.00 | C |
| ATOM | 8610 | O   | PHE D 677 | 113.819 | 53.501 | 32.119 | 1.00 | 0.00 | O |
| ATOM | 8611 | CB  | PHE D 677 | 112.796 | 54.964 | 29.409 | 1.00 | 0.00 | C |
| ATOM | 8612 | CG  | PHE D 677 | 114.026 | 55.669 | 29.869 | 1.00 | 0.00 | C |
| ATOM | 8613 | CD1 | PHE D 677 | 115.219 | 55.516 | 29.200 | 1.00 | 0.00 | C |
| ATOM | 8614 | CD2 | PHE D 677 | 113.980 | 56.491 | 30.971 | 1.00 | 0.00 | C |
| ATOM | 8615 | CE1 | PHE D 677 | 116.349 | 56.171 | 29.630 | 1.00 | 0.00 | C |
| ATOM | 8616 | CE2 | PHE D 677 | 115.106 | 57.147 | 31.405 | 1.00 | 0.00 | C |
| ATOM | 8617 | CZ  | PHE D 677 | 116.294 | 56.987 | 30.735 | 1.00 | 0.00 | C |

|      |      |     |           |         |        |        |      |      |     |
|------|------|-----|-----------|---------|--------|--------|------|------|-----|
| ATOM | 8618 | N   | LEU D 678 | 111.604 | 53.934 | 32.089 | 1.00 | 0.00 | N   |
| ATOM | 8619 | CA  | LEU D 678 | 111.575 | 54.081 | 33.519 | 1.00 | 0.00 | C   |
| ATOM | 8620 | C   | LEU D 678 | 112.064 | 52.810 | 34.120 | 1.00 | 0.00 | C   |
| ATOM | 8621 | O   | LEU D 678 | 112.903 | 52.813 | 35.019 | 1.00 | 0.00 | O   |
| ATOM | 8622 | CB  | LEU D 678 | 110.175 | 54.187 | 34.147 | 1.00 | 0.00 | C   |
| ATOM | 8623 | CG  | LEU D 678 | 109.380 | 55.487 | 33.967 | 1.00 | 0.00 | C   |
| ATOM | 8624 | CD1 | LEU D 678 | 108.955 | 55.721 | 32.514 | 1.00 | 0.00 | C   |
| ATOM | 8625 | CD2 | LEU D 678 | 108.197 | 55.492 | 34.950 | 1.00 | 0.00 | C   |
| ATOM | 8626 | N   | SER D 679 | 111.537 | 51.687 | 33.614 | 1.00 | 0.00 | N   |
| ATOM | 8627 | CA  | SER D 679 | 111.831 | 50.396 | 34.158 | 1.00 | 0.00 | C   |
| ATOM | 8628 | C   | SER D 679 | 113.297 | 50.133 | 34.040 | 1.00 | 0.00 | C   |
| ATOM | 8629 | O   | SER D 679 | 113.915 | 49.603 | 34.965 | 1.00 | 0.00 | O   |
| ATOM | 8630 | CB  | SER D 679 | 111.101 | 49.271 | 33.406 | 1.00 | 0.00 | C   |
| ATOM | 8631 | OG  | SER D 679 | 111.428 | 48.012 | 33.971 | 1.00 | 0.00 | O   |
| ATOM | 8632 | N   | LYS D 680 | 113.902 | 50.505 | 32.901 | 1.00 | 0.00 | N   |
| ATOM | 8633 | CA  | LYS D 680 | 115.295 | 50.234 | 32.719 | 1.00 | 0.00 | C   |
| ATOM | 8634 | C   | LYS D 680 | 116.049 | 50.989 | 33.761 | 1.00 | 0.00 | C   |
| ATOM | 8635 | O   | LYS D 680 | 116.984 | 50.463 | 34.362 | 1.00 | 0.00 | O   |
| ATOM | 8636 | CB  | LYS D 680 | 115.797 | 50.676 | 31.331 | 1.00 | 0.00 | C   |
| ATOM | 8637 | CG  | LYS D 680 | 117.266 | 50.348 | 31.021 | 1.00 | 0.00 | C   |
| ATOM | 8638 | CD  | LYS D 680 | 118.297 | 51.110 | 31.860 | 1.00 | 0.00 | C   |
| ATOM | 8639 | CE  | LYS D 680 | 119.750 | 50.798 | 31.489 | 1.00 | 0.00 | C   |
| ATOM | 8640 | NZ  | LYS D 680 | 120.671 | 51.614 | 32.309 | 1.00 | 0.00 | N1+ |
| ATOM | 8641 | N   | GLN D 681 | 115.658 | 52.253 | 33.999 | 1.00 | 0.00 | N   |
| ATOM | 8642 | CA  | GLN D 681 | 116.341 | 53.077 | 34.951 | 1.00 | 0.00 | C   |
| ATOM | 8643 | C   | GLN D 681 | 116.143 | 52.529 | 36.333 | 1.00 | 0.00 | C   |
| ATOM | 8644 | O   | GLN D 681 | 117.067 | 52.522 | 37.141 | 1.00 | 0.00 | O   |
| ATOM | 8645 | CB  | GLN D 681 | 115.841 | 54.533 | 34.927 | 1.00 | 0.00 | C   |
| ATOM | 8646 | CG  | GLN D 681 | 116.547 | 55.446 | 35.932 | 1.00 | 0.00 | C   |
| ATOM | 8647 | CD  | GLN D 681 | 116.091 | 56.875 | 35.660 | 1.00 | 0.00 | C   |
| ATOM | 8648 | NE2 | GLN D 681 | 115.201 | 57.412 | 36.535 | 1.00 | 0.00 | N   |
| ATOM | 8649 | OE1 | GLN D 681 | 116.516 | 57.496 | 34.689 | 1.00 | 0.00 | O   |
| ATOM | 8650 | N   | TRP D 682 | 114.921 | 52.051 | 36.624 | 1.00 | 0.00 | N   |
| ATOM | 8651 | CA  | TRP D 682 | 114.553 | 51.568 | 37.926 | 1.00 | 0.00 | C   |
| ATOM | 8652 | C   | TRP D 682 | 115.403 | 50.391 | 38.304 | 1.00 | 0.00 | C   |
| ATOM | 8653 | O   | TRP D 682 | 115.980 | 50.354 | 39.389 | 1.00 | 0.00 | O   |
| ATOM | 8654 | CB  | TRP D 682 | 113.089 | 51.098 | 37.945 | 1.00 | 0.00 | C   |
| ATOM | 8655 | CG  | TRP D 682 | 112.592 | 50.586 | 39.276 | 1.00 | 0.00 | C   |
| ATOM | 8656 | CD1 | TRP D 682 | 112.641 | 49.322 | 39.788 | 1.00 | 0.00 | C   |
| ATOM | 8657 | CD2 | TRP D 682 | 111.914 | 51.396 | 40.246 | 1.00 | 0.00 | C   |
| ATOM | 8658 | CE2 | TRP D 682 | 111.588 | 50.566 | 41.318 | 1.00 | 0.00 | C   |
| ATOM | 8659 | CE3 | TRP D 682 | 111.586 | 52.720 | 40.245 | 1.00 | 0.00 | C   |
| ATOM | 8660 | NE1 | TRP D 682 | 112.040 | 49.295 | 41.026 | 1.00 | 0.00 | N   |
| ATOM | 8661 | CZ2 | TRP D 682 | 110.923 | 51.051 | 42.410 | 1.00 | 0.00 | C   |

|      |      |               |         |        |        |      |      |   |
|------|------|---------------|---------|--------|--------|------|------|---|
| ATOM | 8662 | CZ3 TRP D 682 | 110.920 | 53.208 | 41.347 | 1.00 | 0.00 | C |
| ATOM | 8663 | CH2 TRP D 682 | 110.595 | 52.387 | 42.410 | 1.00 | 0.00 | C |
| ATOM | 8664 | N TYR D 683   | 115.498 | 49.392 | 37.406 | 1.00 | 0.00 | N |
| ATOM | 8665 | CA TYR D 683  | 116.250 | 48.191 | 37.649 | 1.00 | 0.00 | C |
| ATOM | 8666 | C TYR D 683   | 117.699 | 48.515 | 37.747 | 1.00 | 0.00 | C |
| ATOM | 8667 | O TYR D 683   | 118.432 | 47.875 | 38.502 | 1.00 | 0.00 | O |
| ATOM | 8668 | CB TYR D 683  | 116.107 | 47.122 | 36.552 | 1.00 | 0.00 | C |
| ATOM | 8669 | CG TYR D 683  | 114.748 | 46.524 | 36.647 | 1.00 | 0.00 | C |
| ATOM | 8670 | CD1 TYR D 683 | 114.425 | 45.697 | 37.698 | 1.00 | 0.00 | C |
| ATOM | 8671 | CD2 TYR D 683 | 113.805 | 46.767 | 35.676 | 1.00 | 0.00 | C |
| ATOM | 8672 | CE1 TYR D 683 | 113.176 | 45.132 | 37.788 | 1.00 | 0.00 | C |
| ATOM | 8673 | CE2 TYR D 683 | 112.554 | 46.204 | 35.762 | 1.00 | 0.00 | C |
| ATOM | 8674 | CZ TYR D 683  | 112.238 | 45.388 | 36.819 | 1.00 | 0.00 | C |
| ATOM | 8675 | OH TYR D 683  | 110.952 | 44.811 | 36.902 | 1.00 | 0.00 | O |
| ATOM | 8676 | N GLY D 684   | 118.170 | 49.489 | 36.950 | 1.00 | 0.00 | N |
| ATOM | 8677 | CA GLY D 684  | 119.561 | 49.807 | 36.991 | 1.00 | 0.00 | C |
| ATOM | 8678 | C GLY D 684   | 120.270 | 48.797 | 36.152 | 1.00 | 0.00 | C |
| ATOM | 8679 | O GLY D 684   | 119.756 | 48.353 | 35.126 | 1.00 | 0.00 | O |
| ATOM | 8680 | N GLU D 685   | 121.485 | 48.425 | 36.586 | 1.00 | 0.00 | N |
| ATOM | 8681 | CA GLU D 685  | 122.333 | 47.491 | 35.917 | 1.00 | 0.00 | C |
| ATOM | 8682 | C GLU D 685   | 121.648 | 46.167 | 35.867 | 1.00 | 0.00 | C |
| ATOM | 8683 | O GLU D 685   | 121.761 | 45.445 | 34.878 | 1.00 | 0.00 | O |
| ATOM | 8684 | CB GLU D 685  | 123.653 | 47.292 | 36.685 | 1.00 | 0.00 | C |
| ATOM | 8685 | CG GLU D 685  | 124.451 | 46.048 | 36.291 | 1.00 | 0.00 | C |
| ATOM | 8686 | CD GLU D 685  | 125.240 | 46.316 | 35.021 | 1.00 | 0.00 | C |
| ATOM | 8687 | OE1 GLU D 685 | 125.693 | 47.478 | 34.827 | 1.00 | 0.00 | O |
| ATOM | 8688 | OE2 GLU D 685 | 125.405 | 45.350 | 34.232 | 1.00 | 0.00 | O |
| ATOM | 8689 | N ILE D 686   | 120.925 | 45.805 | 36.940 | 1.00 | 0.00 | N |
| ATOM | 8690 | CA ILE D 686  | 120.302 | 44.518 | 36.970 | 1.00 | 0.00 | C |
| ATOM | 8691 | C ILE D 686   | 119.270 | 44.462 | 35.895 | 1.00 | 0.00 | C |
| ATOM | 8692 | O ILE D 686   | 118.472 | 45.380 | 35.720 | 1.00 | 0.00 | O |
| ATOM | 8693 | CB ILE D 686  | 119.649 | 44.195 | 38.286 | 1.00 | 0.00 | C |
| ATOM | 8694 | CG1 ILE D 686 | 120.692 | 44.188 | 39.420 | 1.00 | 0.00 | C |
| ATOM | 8695 | CG2 ILE D 686 | 118.932 | 42.847 | 38.130 | 1.00 | 0.00 | C |
| ATOM | 8696 | CD1 ILE D 686 | 121.274 | 45.568 | 39.733 | 1.00 | 0.00 | C |
| ATOM | 8697 | N SER D 687   | 119.292 | 43.360 | 35.120 | 1.00 | 0.00 | N |
| ATOM | 8698 | CA SER D 687  | 118.378 | 43.183 | 34.035 | 1.00 | 0.00 | C |
| ATOM | 8699 | C SER D 687   | 117.046 | 42.818 | 34.601 | 1.00 | 0.00 | C |
| ATOM | 8700 | O SER D 687   | 116.932 | 42.361 | 35.739 | 1.00 | 0.00 | O |
| ATOM | 8701 | CB SER D 687  | 118.796 | 42.076 | 33.054 | 1.00 | 0.00 | C |
| ATOM | 8702 | OG SER D 687  | 117.843 | 41.960 | 32.008 | 1.00 | 0.00 | O |
| ATOM | 8703 | N ARG D 688   | 115.993 | 43.027 | 33.790 | 1.00 | 0.00 | N |
| ATOM | 8704 | CA ARG D 688  | 114.635 | 42.775 | 34.167 | 1.00 | 0.00 | C |
| ATOM | 8705 | C ARG D 688   | 114.327 | 41.326 | 33.952 | 1.00 | 0.00 | C |

|      |      |     |           |         |        |        |      |      |     |
|------|------|-----|-----------|---------|--------|--------|------|------|-----|
| ATOM | 8706 | O   | ARG D 688 | 115.198 | 40.532 | 33.602 | 1.00 | 0.00 | O   |
| ATOM | 8707 | CB  | ARG D 688 | 113.624 | 43.603 | 33.355 | 1.00 | 0.00 | C   |
| ATOM | 8708 | CG  | ARG D 688 | 113.695 | 43.354 | 31.849 | 1.00 | 0.00 | C   |
| ATOM | 8709 | CD  | ARG D 688 | 112.883 | 44.366 | 31.037 | 1.00 | 0.00 | C   |
| ATOM | 8710 | NE  | ARG D 688 | 113.689 | 45.616 | 30.952 | 1.00 | 0.00 | N   |
| ATOM | 8711 | CZ  | ARG D 688 | 113.070 | 46.826 | 30.824 | 1.00 | 0.00 | C   |
| ATOM | 8712 | NH1 | ARG D 688 | 111.707 | 46.905 | 30.834 | 1.00 | 0.00 | N   |
| ATOM | 8713 | NH2 | ARG D 688 | 113.817 | 47.962 | 30.684 | 1.00 | 0.00 | N   |
| ATOM | 8714 | N   | ASP D 689 | 113.052 | 40.968 | 34.187 | 1.00 | 0.00 | N   |
| ATOM | 8715 | CA  | ASP D 689 | 112.545 | 39.636 | 34.049 | 1.00 | 0.00 | C   |
| ATOM | 8716 | C   | ASP D 689 | 113.250 | 38.711 | 34.988 | 1.00 | 0.00 | C   |
| ATOM | 8717 | O   | ASP D 689 | 113.605 | 37.591 | 34.626 | 1.00 | 0.00 | O   |
| ATOM | 8718 | CB  | ASP D 689 | 112.678 | 39.066 | 32.625 | 1.00 | 0.00 | C   |
| ATOM | 8719 | CG  | ASP D 689 | 111.809 | 37.818 | 32.543 | 1.00 | 0.00 | C   |
| ATOM | 8720 | OD1 | ASP D 689 | 111.120 | 37.509 | 33.551 | 1.00 | 0.00 | O   |
| ATOM | 8721 | OD2 | ASP D 689 | 111.822 | 37.161 | 31.467 | 1.00 | 0.00 | O   |
| ATOM | 8722 | N   | THR D 690 | 113.475 | 39.174 | 36.233 | 1.00 | 0.00 | N   |
| ATOM | 8723 | CA  | THR D 690 | 114.039 | 38.328 | 37.244 | 1.00 | 0.00 | C   |
| ATOM | 8724 | C   | THR D 690 | 113.051 | 38.341 | 38.365 | 1.00 | 0.00 | C   |
| ATOM | 8725 | O   | THR D 690 | 112.207 | 39.232 | 38.448 | 1.00 | 0.00 | O   |
| ATOM | 8726 | CB  | THR D 690 | 115.350 | 38.808 | 37.805 | 1.00 | 0.00 | C   |
| ATOM | 8727 | CG2 | THR D 690 | 116.373 | 38.896 | 36.660 | 1.00 | 0.00 | C   |
| ATOM | 8728 | OG1 | THR D 690 | 115.192 | 40.072 | 38.430 | 1.00 | 0.00 | O   |
| ATOM | 8729 | N   | LYS D 691 | 113.109 | 37.328 | 39.251 | 1.00 | 0.00 | N   |
| ATOM | 8730 | CA  | LYS D 691 | 112.166 | 37.286 | 40.330 | 1.00 | 0.00 | C   |
| ATOM | 8731 | C   | LYS D 691 | 112.517 | 38.355 | 41.311 | 1.00 | 0.00 | C   |
| ATOM | 8732 | O   | LYS D 691 | 113.681 | 38.604 | 41.614 | 1.00 | 0.00 | O   |
| ATOM | 8733 | CB  | LYS D 691 | 112.155 | 35.950 | 41.084 | 1.00 | 0.00 | C   |
| ATOM | 8734 | CG  | LYS D 691 | 111.520 | 34.819 | 40.280 | 1.00 | 0.00 | C   |
| ATOM | 8735 | CD  | LYS D 691 | 111.844 | 33.426 | 40.814 | 1.00 | 0.00 | C   |
| ATOM | 8736 | CE  | LYS D 691 | 111.096 | 32.304 | 40.095 | 1.00 | 0.00 | C   |
| ATOM | 8737 | NZ  | LYS D 691 | 111.470 | 30.994 | 40.669 | 1.00 | 0.00 | N1+ |
| ATOM | 8738 | N   | ASN D 692 | 111.491 | 39.048 | 41.825 | 1.00 | 0.00 | N   |
| ATOM | 8739 | CA  | ASN D 692 | 111.729 | 40.089 | 42.772 | 1.00 | 0.00 | C   |
| ATOM | 8740 | C   | ASN D 692 | 112.203 | 39.484 | 44.055 | 1.00 | 0.00 | C   |
| ATOM | 8741 | O   | ASN D 692 | 113.104 | 40.006 | 44.705 | 1.00 | 0.00 | O   |
| ATOM | 8742 | CB  | ASN D 692 | 110.473 | 40.915 | 43.080 | 1.00 | 0.00 | C   |
| ATOM | 8743 | CG  | ASN D 692 | 110.918 | 42.200 | 43.761 | 1.00 | 0.00 | C   |
| ATOM | 8744 | ND2 | ASN D 692 | 110.455 | 43.359 | 43.220 | 1.00 | 0.00 | N   |
| ATOM | 8745 | OD1 | ASN D 692 | 111.664 | 42.177 | 44.738 | 1.00 | 0.00 | O   |
| ATOM | 8746 | N   | TRP D 693 | 111.603 | 38.343 | 44.444 | 1.00 | 0.00 | N   |
| ATOM | 8747 | CA  | TRP D 693 | 111.924 | 37.758 | 45.712 | 1.00 | 0.00 | C   |
| ATOM | 8748 | C   | TRP D 693 | 113.369 | 37.387 | 45.717 | 1.00 | 0.00 | C   |
| ATOM | 8749 | O   | TRP D 693 | 114.072 | 37.607 | 46.701 | 1.00 | 0.00 | O   |

|      |      |     |     |   |     |         |        |        |      |      |     |
|------|------|-----|-----|---|-----|---------|--------|--------|------|------|-----|
| ATOM | 8750 | CB  | TRP | D | 693 | 111.115 | 36.485 | 46.029 | 1.00 | 0.00 | C   |
| ATOM | 8751 | CG  | TRP | D | 693 | 111.384 | 35.298 | 45.131 | 1.00 | 0.00 | C   |
| ATOM | 8752 | CD1 | TRP | D | 693 | 110.753 | 34.898 | 43.990 | 1.00 | 0.00 | C   |
| ATOM | 8753 | CD2 | TRP | D | 693 | 112.403 | 34.322 | 45.394 | 1.00 | 0.00 | C   |
| ATOM | 8754 | CE2 | TRP | D | 693 | 112.333 | 33.365 | 44.381 | 1.00 | 0.00 | C   |
| ATOM | 8755 | CE3 | TRP | D | 693 | 113.321 | 34.226 | 46.400 | 1.00 | 0.00 | C   |
| ATOM | 8756 | NE1 | TRP | D | 693 | 111.315 | 33.732 | 43.526 | 1.00 | 0.00 | N   |
| ATOM | 8757 | CZ2 | TRP | D | 693 | 113.181 | 32.298 | 44.357 | 1.00 | 0.00 | C   |
| ATOM | 8758 | CZ3 | TRP | D | 693 | 114.180 | 33.149 | 46.371 | 1.00 | 0.00 | C   |
| ATOM | 8759 | CH2 | TRP | D | 693 | 114.111 | 32.203 | 45.370 | 1.00 | 0.00 | C   |
| ATOM | 8760 | N   | LYS | D | 694 | 113.854 | 36.822 | 44.599 | 1.00 | 0.00 | N   |
| ATOM | 8761 | CA  | LYS | D | 694 | 115.213 | 36.380 | 44.542 | 1.00 | 0.00 | C   |
| ATOM | 8762 | C   | LYS | D | 694 | 116.122 | 37.560 | 44.694 | 1.00 | 0.00 | C   |
| ATOM | 8763 | O   | LYS | D | 694 | 117.177 | 37.450 | 45.318 | 1.00 | 0.00 | O   |
| ATOM | 8764 | CB  | LYS | D | 694 | 115.553 | 35.641 | 43.236 | 1.00 | 0.00 | C   |
| ATOM | 8765 | CG  | LYS | D | 694 | 115.396 | 36.523 | 42.009 | 1.00 | 0.00 | C   |
| ATOM | 8766 | CD  | LYS | D | 694 | 115.786 | 35.865 | 40.692 | 1.00 | 0.00 | C   |
| ATOM | 8767 | CE  | LYS | D | 694 | 114.771 | 34.837 | 40.196 | 1.00 | 0.00 | C   |
| ATOM | 8768 | NZ  | LYS | D | 694 | 115.028 | 34.536 | 38.772 | 1.00 | 0.00 | N1+ |
| ATOM | 8769 | N   | ILE | D | 695 | 115.742 | 38.722 | 44.137 | 1.00 | 0.00 | N   |
| ATOM | 8770 | CA  | ILE | D | 695 | 116.574 | 39.886 | 44.221 | 1.00 | 0.00 | C   |
| ATOM | 8771 | C   | ILE | D | 695 | 116.712 | 40.240 | 45.670 | 1.00 | 0.00 | C   |
| ATOM | 8772 | O   | ILE | D | 695 | 117.805 | 40.522 | 46.158 | 1.00 | 0.00 | O   |
| ATOM | 8773 | CB  | ILE | D | 695 | 115.932 | 41.109 | 43.632 | 1.00 | 0.00 | C   |
| ATOM | 8774 | CG1 | ILE | D | 695 | 115.379 | 40.876 | 42.224 | 1.00 | 0.00 | C   |
| ATOM | 8775 | CG2 | ILE | D | 695 | 116.984 | 42.224 | 43.674 | 1.00 | 0.00 | C   |
| ATOM | 8776 | CD1 | ILE | D | 695 | 114.481 | 42.023 | 41.756 | 1.00 | 0.00 | C   |
| ATOM | 8777 | N   | ILE | D | 696 | 115.577 | 40.239 | 46.391 | 1.00 | 0.00 | N   |
| ATOM | 8778 | CA  | ILE | D | 696 | 115.556 | 40.627 | 47.770 | 1.00 | 0.00 | C   |
| ATOM | 8779 | C   | ILE | D | 696 | 116.361 | 39.652 | 48.559 | 1.00 | 0.00 | C   |
| ATOM | 8780 | O   | ILE | D | 696 | 117.139 | 40.041 | 49.430 | 1.00 | 0.00 | O   |
| ATOM | 8781 | CB  | ILE | D | 696 | 114.172 | 40.658 | 48.351 | 1.00 | 0.00 | C   |
| ATOM | 8782 | CG1 | ILE | D | 696 | 113.305 | 41.691 | 47.611 | 1.00 | 0.00 | C   |
| ATOM | 8783 | CG2 | ILE | D | 696 | 114.296 | 40.930 | 49.861 | 1.00 | 0.00 | C   |
| ATOM | 8784 | CD1 | ILE | D | 696 | 111.819 | 41.601 | 47.957 | 1.00 | 0.00 | C   |
| ATOM | 8785 | N   | LEU | D | 697 | 116.209 | 38.349 | 48.267 | 1.00 | 0.00 | N   |
| ATOM | 8786 | CA  | LEU | D | 697 | 116.926 | 37.371 | 49.027 | 1.00 | 0.00 | C   |
| ATOM | 8787 | C   | LEU | D | 697 | 118.367 | 37.665 | 48.810 | 1.00 | 0.00 | C   |
| ATOM | 8788 | O   | LEU | D | 697 | 119.144 | 37.722 | 49.759 | 1.00 | 0.00 | O   |
| ATOM | 8789 | CB  | LEU | D | 697 | 116.637 | 35.928 | 48.555 | 1.00 | 0.00 | C   |
| ATOM | 8790 | CG  | LEU | D | 697 | 117.183 | 34.788 | 49.450 | 1.00 | 0.00 | C   |
| ATOM | 8791 | CD1 | LEU | D | 697 | 116.818 | 33.418 | 48.856 | 1.00 | 0.00 | C   |
| ATOM | 8792 | CD2 | LEU | D | 697 | 118.687 | 34.900 | 49.742 | 1.00 | 0.00 | C   |
| ATOM | 8793 | N   | CYS | D | 698 | 118.739 | 37.933 | 47.548 | 1.00 | 0.00 | N   |

|      |      |     |           |         |        |        |      |      |   |
|------|------|-----|-----------|---------|--------|--------|------|------|---|
| ATOM | 8794 | CA  | CYS D 698 | 120.107 | 38.161 | 47.205 | 1.00 | 0.00 | C |
| ATOM | 8795 | C   | CYS D 698 | 120.584 | 39.329 | 47.993 | 1.00 | 0.00 | C |
| ATOM | 8796 | O   | CYS D 698 | 121.731 | 39.347 | 48.427 | 1.00 | 0.00 | O |
| ATOM | 8797 | CB  | CYS D 698 | 120.306 | 38.491 | 45.713 | 1.00 | 0.00 | C |
| ATOM | 8798 | SG  | CYS D 698 | 119.937 | 37.073 | 44.638 | 1.00 | 0.00 | S |
| ATOM | 8799 | N   | LEU D 699 | 119.698 | 40.310 | 48.234 | 1.00 | 0.00 | N |
| ATOM | 8800 | CA  | LEU D 699 | 120.059 | 41.533 | 48.891 | 1.00 | 0.00 | C |
| ATOM | 8801 | C   | LEU D 699 | 120.623 | 41.269 | 50.248 | 1.00 | 0.00 | C |
| ATOM | 8802 | O   | LEU D 699 | 121.583 | 41.923 | 50.648 | 1.00 | 0.00 | O |
| ATOM | 8803 | CB  | LEU D 699 | 118.855 | 42.459 | 49.120 | 1.00 | 0.00 | C |
| ATOM | 8804 | CG  | LEU D 699 | 119.232 | 43.776 | 49.823 | 1.00 | 0.00 | C |
| ATOM | 8805 | CD1 | LEU D 699 | 119.990 | 44.719 | 48.879 | 1.00 | 0.00 | C |
| ATOM | 8806 | CD2 | LEU D 699 | 118.015 | 44.422 | 50.499 | 1.00 | 0.00 | C |
| ATOM | 8807 | N   | PHE D 700 | 120.028 | 40.356 | 51.040 | 1.00 | 0.00 | N |
| ATOM | 8808 | CA  | PHE D 700 | 120.588 | 40.176 | 52.349 | 1.00 | 0.00 | C |
| ATOM | 8809 | C   | PHE D 700 | 121.940 | 39.517 | 52.263 | 1.00 | 0.00 | C |
| ATOM | 8810 | O   | PHE D 700 | 122.918 | 39.988 | 52.838 | 1.00 | 0.00 | O |
| ATOM | 8811 | CB  | PHE D 700 | 119.727 | 39.318 | 53.290 | 1.00 | 0.00 | C |
| ATOM | 8812 | CG  | PHE D 700 | 120.286 | 39.531 | 54.651 | 1.00 | 0.00 | C |
| ATOM | 8813 | CD1 | PHE D 700 | 119.841 | 40.580 | 55.423 | 1.00 | 0.00 | C |
| ATOM | 8814 | CD2 | PHE D 700 | 121.263 | 38.703 | 55.157 | 1.00 | 0.00 | C |
| ATOM | 8815 | CE1 | PHE D 700 | 120.347 | 40.800 | 56.680 | 1.00 | 0.00 | C |
| ATOM | 8816 | CE2 | PHE D 700 | 121.775 | 38.920 | 56.415 | 1.00 | 0.00 | C |
| ATOM | 8817 | CZ  | PHE D 700 | 121.318 | 39.967 | 57.179 | 1.00 | 0.00 | C |
| ATOM | 8818 | N   | ILE D 701 | 121.976 | 38.399 | 51.513 | 1.00 | 0.00 | N |
| ATOM | 8819 | CA  | ILE D 701 | 123.009 | 37.435 | 51.216 | 1.00 | 0.00 | C |
| ATOM | 8820 | C   | ILE D 701 | 124.103 | 37.930 | 50.289 | 1.00 | 0.00 | C |
| ATOM | 8821 | O   | ILE D 701 | 125.080 | 37.225 | 50.049 | 1.00 | 0.00 | O |
| ATOM | 8822 | CB  | ILE D 701 | 122.448 | 36.069 | 50.854 | 1.00 | 0.00 | C |
| ATOM | 8823 | CG1 | ILE D 701 | 123.553 | 35.030 | 50.603 | 1.00 | 0.00 | C |
| ATOM | 8824 | CG2 | ILE D 701 | 121.401 | 36.203 | 49.746 | 1.00 | 0.00 | C |
| ATOM | 8825 | CD1 | ILE D 701 | 124.354 | 34.672 | 51.852 | 1.00 | 0.00 | C |
| ATOM | 8826 | N   | ILE D 702 | 123.987 | 39.147 | 49.721 | 1.00 | 0.00 | N |
| ATOM | 8827 | CA  | ILE D 702 | 124.739 | 39.574 | 48.563 | 1.00 | 0.00 | C |
| ATOM | 8828 | C   | ILE D 702 | 126.204 | 39.238 | 48.552 | 1.00 | 0.00 | C |
| ATOM | 8829 | O   | ILE D 702 | 126.603 | 38.704 | 47.519 | 1.00 | 0.00 | O |
| ATOM | 8830 | CB  | ILE D 702 | 124.723 | 41.069 | 48.337 | 1.00 | 0.00 | C |
| ATOM | 8831 | CG1 | ILE D 702 | 125.395 | 41.798 | 49.510 | 1.00 | 0.00 | C |
| ATOM | 8832 | CG2 | ILE D 702 | 123.293 | 41.555 | 48.061 | 1.00 | 0.00 | C |
| ATOM | 8833 | CD1 | ILE D 702 | 125.703 | 43.268 | 49.228 | 1.00 | 0.00 | C |
| ATOM | 8834 | N   | PRO D 703 | 127.048 | 39.475 | 49.528 | 1.00 | 0.00 | N |
| ATOM | 8835 | CA  | PRO D 703 | 128.464 | 39.214 | 49.365 | 1.00 | 0.00 | C |
| ATOM | 8836 | C   | PRO D 703 | 128.794 | 37.838 | 48.854 | 1.00 | 0.00 | C |
| ATOM | 8837 | O   | PRO D 703 | 129.563 | 37.739 | 47.898 | 1.00 | 0.00 | O |

|      |      |     |           |         |        |        |      |      |   |
|------|------|-----|-----------|---------|--------|--------|------|------|---|
| ATOM | 8838 | CB  | PRO D 703 | 129.073 | 39.442 | 50.746 | 1.00 | 0.00 | C |
| ATOM | 8839 | CG  | PRO D 703 | 127.929 | 39.051 | 51.697 | 1.00 | 0.00 | C |
| ATOM | 8840 | CD  | PRO D 703 | 126.654 | 39.437 | 50.927 | 1.00 | 0.00 | C |
| ATOM | 8841 | N   | LEU D 704 | 128.285 | 36.770 | 49.497 | 1.00 | 0.00 | N |
| ATOM | 8842 | CA  | LEU D 704 | 128.552 | 35.437 | 49.025 | 1.00 | 0.00 | C |
| ATOM | 8843 | C   | LEU D 704 | 127.726 | 35.108 | 47.809 | 1.00 | 0.00 | C |
| ATOM | 8844 | O   | LEU D 704 | 128.250 | 34.740 | 46.761 | 1.00 | 0.00 | O |
| ATOM | 8845 | CB  | LEU D 704 | 128.203 | 34.386 | 50.104 | 1.00 | 0.00 | C |
| ATOM | 8846 | CG  | LEU D 704 | 128.687 | 32.933 | 49.877 | 1.00 | 0.00 | C |
| ATOM | 8847 | CD1 | LEU D 704 | 128.198 | 32.046 | 51.028 | 1.00 | 0.00 | C |
| ATOM | 8848 | CD2 | LEU D 704 | 128.319 | 32.330 | 48.512 | 1.00 | 0.00 | C |
| ATOM | 8849 | N   | VAL D 705 | 126.392 | 35.253 | 47.963 | 1.00 | 0.00 | N |
| ATOM | 8850 | CA  | VAL D 705 | 125.351 | 34.822 | 47.059 | 1.00 | 0.00 | C |
| ATOM | 8851 | C   | VAL D 705 | 125.211 | 35.625 | 45.804 | 1.00 | 0.00 | C |
| ATOM | 8852 | O   | VAL D 705 | 124.813 | 35.092 | 44.770 | 1.00 | 0.00 | O |
| ATOM | 8853 | CB  | VAL D 705 | 124.001 | 34.859 | 47.695 | 1.00 | 0.00 | C |
| ATOM | 8854 | CG1 | VAL D 705 | 123.620 | 36.336 | 47.854 | 1.00 | 0.00 | C |
| ATOM | 8855 | CG2 | VAL D 705 | 123.016 | 34.047 | 46.836 | 1.00 | 0.00 | C |
| ATOM | 8856 | N   | GLY D 706 | 125.505 | 36.934 | 45.858 | 1.00 | 0.00 | N |
| ATOM | 8857 | CA  | GLY D 706 | 125.178 | 37.834 | 44.798 | 1.00 | 0.00 | C |
| ATOM | 8858 | C   | GLY D 706 | 125.829 | 37.449 | 43.507 | 1.00 | 0.00 | C |
| ATOM | 8859 | O   | GLY D 706 | 125.280 | 37.708 | 42.438 | 1.00 | 0.00 | O |
| ATOM | 8860 | N   | CYS D 707 | 127.033 | 36.863 | 43.562 | 1.00 | 0.00 | N |
| ATOM | 8861 | CA  | CYS D 707 | 127.739 | 36.625 | 42.340 | 1.00 | 0.00 | C |
| ATOM | 8862 | C   | CYS D 707 | 126.982 | 35.745 | 41.386 | 1.00 | 0.00 | C |
| ATOM | 8863 | O   | CYS D 707 | 126.774 | 36.120 | 40.233 | 1.00 | 0.00 | O |
| ATOM | 8864 | CB  | CYS D 707 | 129.106 | 35.953 | 42.561 | 1.00 | 0.00 | C |
| ATOM | 8865 | SG  | CYS D 707 | 130.293 | 37.017 | 43.434 | 1.00 | 0.00 | S |
| ATOM | 8866 | N   | GLY D 708 | 126.545 | 34.555 | 41.833 | 1.00 | 0.00 | N |
| ATOM | 8867 | CA  | GLY D 708 | 126.009 | 33.606 | 40.894 | 1.00 | 0.00 | C |
| ATOM | 8868 | C   | GLY D 708 | 124.688 | 33.952 | 40.263 | 1.00 | 0.00 | C |
| ATOM | 8869 | O   | GLY D 708 | 124.575 | 33.965 | 39.037 | 1.00 | 0.00 | O |
| ATOM | 8870 | N   | PHE D 709 | 123.651 | 34.244 | 41.070 | 1.00 | 0.00 | N |
| ATOM | 8871 | CA  | PHE D 709 | 122.334 | 34.327 | 40.497 | 1.00 | 0.00 | C |
| ATOM | 8872 | C   | PHE D 709 | 122.077 | 35.540 | 39.665 | 1.00 | 0.00 | C |
| ATOM | 8873 | O   | PHE D 709 | 121.464 | 35.435 | 38.605 | 1.00 | 0.00 | O |
| ATOM | 8874 | CB  | PHE D 709 | 121.179 | 34.249 | 41.505 | 1.00 | 0.00 | C |
| ATOM | 8875 | CG  | PHE D 709 | 119.985 | 33.984 | 40.649 | 1.00 | 0.00 | C |
| ATOM | 8876 | CD1 | PHE D 709 | 119.644 | 32.690 | 40.333 | 1.00 | 0.00 | C |
| ATOM | 8877 | CD2 | PHE D 709 | 119.223 | 35.009 | 40.138 | 1.00 | 0.00 | C |
| ATOM | 8878 | CE1 | PHE D 709 | 118.557 | 32.420 | 39.537 | 1.00 | 0.00 | C |
| ATOM | 8879 | CE2 | PHE D 709 | 118.138 | 34.743 | 39.335 | 1.00 | 0.00 | C |
| ATOM | 8880 | CZ  | PHE D 709 | 117.800 | 33.449 | 39.032 | 1.00 | 0.00 | C |
| ATOM | 8881 | N   | VAL D 710 | 122.532 | 36.725 | 40.112 | 1.00 | 0.00 | N |



|      |      |     |           |         |        |        |      |      |     |
|------|------|-----|-----------|---------|--------|--------|------|------|-----|
| ATOM | 8882 | CA  | VAL D 710 | 122.096 | 37.929 | 39.462 | 1.00 | 0.00 | C   |
| ATOM | 8883 | C   | VAL D 710 | 122.439 | 37.921 | 38.004 | 1.00 | 0.00 | C   |
| ATOM | 8884 | O   | VAL D 710 | 123.592 | 37.790 | 37.592 | 1.00 | 0.00 | O   |
| ATOM | 8885 | CB  | VAL D 710 | 122.675 | 39.179 | 40.056 | 1.00 | 0.00 | C   |
| ATOM | 8886 | CG1 | VAL D 710 | 122.258 | 39.258 | 41.525 | 1.00 | 0.00 | C   |
| ATOM | 8887 | CG2 | VAL D 710 | 124.194 | 39.169 | 39.860 | 1.00 | 0.00 | C   |
| ATOM | 8888 | N   | SER D 711 | 121.394 | 38.078 | 37.169 | 1.00 | 0.00 | N   |
| ATOM | 8889 | CA  | SER D 711 | 121.651 | 38.162 | 35.768 | 1.00 | 0.00 | C   |
| ATOM | 8890 | C   | SER D 711 | 121.428 | 39.593 | 35.422 | 1.00 | 0.00 | C   |
| ATOM | 8891 | O   | SER D 711 | 120.323 | 40.006 | 35.083 | 1.00 | 0.00 | O   |
| ATOM | 8892 | CB  | SER D 711 | 120.659 | 37.359 | 34.903 | 1.00 | 0.00 | C   |
| ATOM | 8893 | OG  | SER D 711 | 120.753 | 35.973 | 35.190 | 1.00 | 0.00 | O   |
| ATOM | 8894 | N   | PHE D 712 | 122.503 | 40.387 | 35.494 | 1.00 | 0.00 | N   |
| ATOM | 8895 | CA  | PHE D 712 | 122.439 | 41.780 | 35.184 | 1.00 | 0.00 | C   |
| ATOM | 8896 | C   | PHE D 712 | 122.925 | 41.957 | 33.789 | 1.00 | 0.00 | C   |
| ATOM | 8897 | O   | PHE D 712 | 123.345 | 40.991 | 33.152 | 1.00 | 0.00 | O   |
| ATOM | 8898 | CB  | PHE D 712 | 123.256 | 42.638 | 36.173 | 1.00 | 0.00 | C   |
| ATOM | 8899 | CG  | PHE D 712 | 124.638 | 42.079 | 36.268 | 1.00 | 0.00 | C   |
| ATOM | 8900 | CD1 | PHE D 712 | 124.865 | 40.914 | 36.963 | 1.00 | 0.00 | C   |
| ATOM | 8901 | CD2 | PHE D 712 | 125.709 | 42.723 | 35.695 | 1.00 | 0.00 | C   |
| ATOM | 8902 | CE1 | PHE D 712 | 126.132 | 40.389 | 37.063 | 1.00 | 0.00 | C   |
| ATOM | 8903 | CE2 | PHE D 712 | 126.979 | 42.203 | 35.790 | 1.00 | 0.00 | C   |
| ATOM | 8904 | CZ  | PHE D 712 | 127.194 | 41.033 | 36.473 | 1.00 | 0.00 | C   |
| ATOM | 8905 | N   | ARG D 713 | 122.837 | 43.205 | 33.265 | 1.00 | 0.00 | N   |
| ATOM | 8906 | CA  | ARG D 713 | 123.338 | 43.490 | 31.948 | 1.00 | 0.00 | C   |
| ATOM | 8907 | C   | ARG D 713 | 124.752 | 42.980 | 31.944 | 1.00 | 0.00 | C   |
| ATOM | 8908 | O   | ARG D 713 | 125.377 | 42.842 | 32.989 | 1.00 | 0.00 | O   |
| ATOM | 8909 | CB  | ARG D 713 | 123.333 | 44.985 | 31.579 | 1.00 | 0.00 | C   |
| ATOM | 8910 | CG  | ARG D 713 | 121.916 | 45.528 | 31.349 | 1.00 | 0.00 | C   |
| ATOM | 8911 | CD  | ARG D 713 | 121.869 | 46.977 | 30.849 | 1.00 | 0.00 | C   |
| ATOM | 8912 | NE  | ARG D 713 | 120.444 | 47.287 | 30.534 | 1.00 | 0.00 | N   |
| ATOM | 8913 | CZ  | ARG D 713 | 120.128 | 48.330 | 29.713 | 1.00 | 0.00 | C   |
| ATOM | 8914 | NH1 | ARG D 713 | 121.112 | 49.125 | 29.203 | 1.00 | 0.00 | N   |
| ATOM | 8915 | NH2 | ARG D 713 | 118.823 | 48.571 | 29.393 | 1.00 | 0.00 | N   |
| ATOM | 8916 | N   | LYS D 714 | 125.324 | 42.754 | 30.760 | 1.00 | 0.00 | N   |
| ATOM | 8917 | CA  | LYS D 714 | 126.462 | 41.893 | 30.575 | 1.00 | 0.00 | C   |
| ATOM | 8918 | C   | LYS D 714 | 127.641 | 42.051 | 31.515 | 1.00 | 0.00 | C   |
| ATOM | 8919 | O   | LYS D 714 | 128.058 | 41.039 | 32.066 | 1.00 | 0.00 | O   |
| ATOM | 8920 | CB  | LYS D 714 | 127.001 | 42.011 | 29.140 | 1.00 | 0.00 | C   |
| ATOM | 8921 | CG  | LYS D 714 | 128.016 | 40.937 | 28.760 | 1.00 | 0.00 | C   |
| ATOM | 8922 | CD  | LYS D 714 | 128.276 | 40.874 | 27.253 | 1.00 | 0.00 | C   |
| ATOM | 8923 | CE  | LYS D 714 | 129.297 | 39.811 | 26.849 | 1.00 | 0.00 | C   |
| ATOM | 8924 | NZ  | LYS D 714 | 129.495 | 39.841 | 25.383 | 1.00 | 0.00 | N1+ |
| ATOM | 8925 | N   | LYS D 715 | 128.196 | 43.254 | 31.759 | 1.00 | 0.00 | N   |

|        |      |     |           |         |        |        |      |      |     |
|--------|------|-----|-----------|---------|--------|--------|------|------|-----|
| ATOM   | 8926 | CA  | LYS D 715 | 129.400 | 43.470 | 32.552 | 1.00 | 0.00 | C   |
| ATOM   | 8927 | C   | LYS D 715 | 130.427 | 42.379 | 32.358 | 1.00 | 0.00 | C   |
| ATOM   | 8928 | O   | LYS D 715 | 130.683 | 41.575 | 33.254 | 1.00 | 0.00 | O   |
| ATOM   | 8929 | CB  | LYS D 715 | 129.102 | 43.547 | 34.055 | 1.00 | 0.00 | C   |
| ATOM   | 8930 | CG  | LYS D 715 | 128.038 | 44.591 | 34.380 | 1.00 | 0.00 | C   |
| ATOM   | 8931 | CD  | LYS D 715 | 128.425 | 46.001 | 33.949 | 1.00 | 0.00 | C   |
| ATOM   | 8932 | CE  | LYS D 715 | 129.007 | 46.820 | 35.096 | 1.00 | 0.00 | C   |
| ATOM   | 8933 | NZ  | LYS D 715 | 130.177 | 46.116 | 35.664 | 1.00 | 0.00 | N1+ |
| ATOM   | 8934 | N   | PRO D 716 | 131.060 | 42.391 | 31.209 | 1.00 | 0.00 | N   |
| ATOM   | 8935 | CA  | PRO D 716 | 132.033 | 41.401 | 30.801 | 1.00 | 0.00 | C   |
| ATOM   | 8936 | C   | PRO D 716 | 133.418 | 41.466 | 31.367 | 1.00 | 0.00 | C   |
| ATOM   | 8937 | O   | PRO D 716 | 134.176 | 40.539 | 31.091 | 1.00 | 0.00 | O   |
| ATOM   | 8938 | CB  | PRO D 716 | 132.069 | 41.456 | 29.272 | 1.00 | 0.00 | C   |
| ATOM   | 8939 | CG  | PRO D 716 | 131.519 | 42.848 | 28.926 | 1.00 | 0.00 | C   |
| ATOM   | 8940 | CD  | PRO D 716 | 130.544 | 43.138 | 30.073 | 1.00 | 0.00 | C   |
| ATOM   | 8941 | N   | VAL D 717 | 133.799 | 42.514 | 32.131 | 1.00 | 0.00 | N   |
| ATOM   | 8942 | CA  | VAL D 717 | 135.183 | 42.646 | 32.518 | 1.00 | 0.00 | C   |
| ATOM   | 8943 | C   | VAL D 717 | 135.667 | 41.409 | 33.205 | 1.00 | 0.00 | C   |
| ATOM   | 8944 | O   | VAL D 717 | 135.028 | 40.886 | 34.115 | 1.00 | 0.00 | O   |
| ATOM   | 8945 | CB  | VAL D 717 | 135.447 | 43.808 | 33.431 | 1.00 | 0.00 | C   |
| ATOM   | 8946 | CG1 | VAL D 717 | 134.709 | 43.570 | 34.757 | 1.00 | 0.00 | C   |
| ATOM   | 8947 | CG2 | VAL D 717 | 136.971 | 43.965 | 33.585 | 1.00 | 0.00 | C   |
| ATOM   | 8948 | N   | ASP D 718 | 136.828 | 40.899 | 32.740 | 1.00 | 0.00 | N   |
| ATOM   | 8949 | CA  | ASP D 718 | 137.437 | 39.721 | 33.288 | 1.00 | 0.00 | C   |
| ATOM   | 8950 | C   | ASP D 718 | 138.439 | 40.118 | 34.309 | 1.00 | 0.00 | C   |
| ATOM   | 8951 | O   | ASP D 718 | 138.378 | 41.204 | 34.883 | 1.00 | 0.00 | O   |
| ATOM   | 8952 | CB  | ASP D 718 | 138.172 | 38.838 | 32.267 | 1.00 | 0.00 | C   |
| ATOM   | 8953 | CG  | ASP D 718 | 137.151 | 37.917 | 31.636 | 1.00 | 0.00 | C   |
| ATOM   | 8954 | OD1 | ASP D 718 | 136.059 | 37.757 | 32.244 | 1.00 | 0.00 | O   |
| ATOM   | 8955 | OD2 | ASP D 718 | 137.447 | 37.346 | 30.553 | 1.00 | 0.00 | O   |
| ATOM   | 8956 | N   | LYS D 719 | 139.391 | 39.201 | 34.560 | 1.00 | 0.00 | N   |
| ATOM   | 8957 | CA  | LYS D 719 | 140.412 | 39.430 | 35.534 | 1.00 | 0.00 | C   |
| ATOM   | 8958 | C   | LYS D 719 | 139.739 | 39.521 | 36.855 | 1.00 | 0.00 | C   |
| ATOM   | 8959 | O   | LYS D 719 | 140.267 | 40.108 | 37.800 | 1.00 | 0.00 | O   |
| ATOM   | 8960 | CB  | LYS D 719 | 141.167 | 40.749 | 35.302 | 1.00 | 0.00 | C   |
| ATOM   | 8961 | CG  | LYS D 719 | 142.066 | 40.744 | 34.065 | 1.00 | 0.00 | C   |
| ATOM   | 8962 | CD  | LYS D 719 | 143.260 | 39.794 | 34.181 | 1.00 | 0.00 | C   |
| ATOM   | 8963 | CE  | LYS D 719 | 144.364 | 40.331 | 35.096 | 1.00 | 0.00 | C   |
| ATOM   | 8964 | NZ  | LYS D 719 | 145.488 | 39.369 | 35.163 | 1.00 | 0.00 | N1+ |
| HETATM | 8965 | N   | HIE D 720 | 138.543 | 38.915 | 36.949 | 1.00 | 0.00 | N   |
| HETATM | 8966 | CA  | HIE D 720 | 137.780 | 38.927 | 38.163 | 1.00 | 0.00 | C   |
| HETATM | 8967 | C   | HIE D 720 | 137.476 | 40.347 | 38.497 | 1.00 | 0.00 | C   |
| HETATM | 8968 | O   | HIE D 720 | 137.122 | 40.668 | 39.630 | 1.00 | 0.00 | O   |
| HETATM | 8969 | CB  | HIE D 720 | 138.527 | 38.294 | 39.350 | 1.00 | 0.00 | C   |

|             |               |         |        |        |      |      |     |
|-------------|---------------|---------|--------|--------|------|------|-----|
| HETATM 8970 | CG HIE D 720  | 138.748 | 36.821 | 39.185 | 1.00 | 0.00 | C   |
| HETATM 8971 | CD2 HIE D 720 | 139.797 | 36.140 | 38.644 | 1.00 | 0.00 | C   |
| HETATM 8972 | ND1 HIE D 720 | 137.846 | 35.858 | 39.586 | 1.00 | 0.00 | N   |
| HETATM 8973 | CE1 HIE D 720 | 138.387 | 34.657 | 39.271 | 1.00 | 0.00 | C   |
| HETATM 8974 | NE2 HIE D 720 | 139.571 | 34.777 | 38.696 | 1.00 | 0.00 | N   |
| ATOM 8975   | N LYS D 721   | 137.603 | 41.238 | 37.497 | 1.00 | 0.00 | N   |
| ATOM 8976   | CA LYS D 721  | 137.242 | 42.612 | 37.670 | 1.00 | 0.00 | C   |
| ATOM 8977   | C LYS D 721   | 135.765 | 42.615 | 37.812 | 1.00 | 0.00 | C   |
| ATOM 8978   | O LYS D 721   | 135.189 | 43.384 | 38.574 | 1.00 | 0.00 | O   |
| ATOM 8979   | CB LYS D 721  | 137.549 | 43.493 | 36.447 | 1.00 | 0.00 | C   |
| ATOM 8980   | CG LYS D 721  | 138.969 | 44.049 | 36.396 | 1.00 | 0.00 | C   |
| ATOM 8981   | CD LYS D 721  | 139.264 | 45.059 | 37.506 | 1.00 | 0.00 | C   |
| ATOM 8982   | CE LYS D 721  | 139.156 | 44.481 | 38.916 | 1.00 | 0.00 | C   |
| ATOM 8983   | NZ LYS D 721  | 139.449 | 45.530 | 39.919 | 1.00 | 0.00 | NI+ |
| ATOM 8984   | N LYS D 722   | 135.129 | 41.685 | 37.083 | 1.00 | 0.00 | N   |
| ATOM 8985   | CA LYS D 722  | 133.707 | 41.650 | 36.959 | 1.00 | 0.00 | C   |
| ATOM 8986   | C LYS D 722   | 133.048 | 41.537 | 38.292 | 1.00 | 0.00 | C   |
| ATOM 8987   | O LYS D 722   | 132.037 | 42.192 | 38.529 | 1.00 | 0.00 | O   |
| ATOM 8988   | CB LYS D 722  | 133.202 | 40.470 | 36.112 | 1.00 | 0.00 | C   |
| ATOM 8989   | CG LYS D 722  | 133.546 | 39.095 | 36.692 | 1.00 | 0.00 | C   |
| ATOM 8990   | CD LYS D 722  | 135.049 | 38.837 | 36.811 | 1.00 | 0.00 | C   |
| ATOM 8991   | CE LYS D 722  | 135.385 | 37.428 | 37.307 | 1.00 | 0.00 | C   |
| ATOM 8992   | NZ LYS D 722  | 135.278 | 36.459 | 36.192 | 1.00 | 0.00 | NI+ |
| ATOM 8993   | N LEU D 723   | 133.590 | 40.720 | 39.209 | 1.00 | 0.00 | N   |
| ATOM 8994   | CA LEU D 723  | 132.902 | 40.505 | 40.447 | 1.00 | 0.00 | C   |
| ATOM 8995   | C LEU D 723   | 132.739 | 41.810 | 41.175 | 1.00 | 0.00 | C   |
| ATOM 8996   | O LEU D 723   | 131.631 | 42.162 | 41.577 | 1.00 | 0.00 | O   |
| ATOM 8997   | CB LEU D 723  | 133.674 | 39.500 | 41.338 | 1.00 | 0.00 | C   |
| ATOM 8998   | CG LEU D 723  | 133.043 | 39.092 | 42.689 | 1.00 | 0.00 | C   |
| ATOM 8999   | CD1 LEU D 723 | 133.864 | 37.965 | 43.336 | 1.00 | 0.00 | C   |
| ATOM 9000   | CD2 LEU D 723 | 132.886 | 40.269 | 43.664 | 1.00 | 0.00 | C   |
| ATOM 9001   | N LEU D 724   | 133.833 | 42.583 | 41.335 | 1.00 | 0.00 | N   |
| ATOM 9002   | CA LEU D 724  | 133.764 | 43.800 | 42.098 | 1.00 | 0.00 | C   |
| ATOM 9003   | C LEU D 724   | 132.864 | 44.771 | 41.413 | 1.00 | 0.00 | C   |
| ATOM 9004   | O LEU D 724   | 131.993 | 45.379 | 42.035 | 1.00 | 0.00 | O   |
| ATOM 9005   | CB LEU D 724  | 135.123 | 44.513 | 42.221 | 1.00 | 0.00 | C   |
| ATOM 9006   | CG LEU D 724  | 136.197 | 43.705 | 42.968 | 1.00 | 0.00 | C   |
| ATOM 9007   | CD1 LEU D 724 | 135.798 | 43.473 | 44.434 | 1.00 | 0.00 | C   |
| ATOM 9008   | CD2 LEU D 724 | 136.548 | 42.411 | 42.219 | 1.00 | 0.00 | C   |
| ATOM 9009   | N TRP D 725   | 133.041 | 44.918 | 40.090 | 1.00 | 0.00 | N   |
| ATOM 9010   | CA TRP D 725  | 132.284 | 45.876 | 39.350 | 1.00 | 0.00 | C   |
| ATOM 9011   | C TRP D 725   | 130.844 | 45.491 | 39.435 | 1.00 | 0.00 | C   |
| ATOM 9012   | O TRP D 725   | 129.969 | 46.340 | 39.578 | 1.00 | 0.00 | O   |
| ATOM 9013   | CB TRP D 725  | 132.693 | 45.949 | 37.867 | 1.00 | 0.00 | C   |

|      |      |     |     |   |     |         |        |        |      |      |   |
|------|------|-----|-----|---|-----|---------|--------|--------|------|------|---|
| ATOM | 9014 | CG  | TRP | D | 725 | 134.069 | 46.535 | 37.633 | 1.00 | 0.00 | C |
| ATOM | 9015 | CD1 | TRP | D | 725 | 135.278 | 45.910 | 37.527 | 1.00 | 0.00 | C |
| ATOM | 9016 | CD2 | TRP | D | 725 | 134.328 | 47.941 | 37.485 | 1.00 | 0.00 | C |
| ATOM | 9017 | CE2 | TRP | D | 725 | 135.704 | 48.087 | 37.297 | 1.00 | 0.00 | C |
| ATOM | 9018 | CE3 | TRP | D | 725 | 133.491 | 49.018 | 37.506 | 1.00 | 0.00 | C |
| ATOM | 9019 | NE1 | TRP | D | 725 | 136.273 | 46.832 | 37.327 | 1.00 | 0.00 | N |
| ATOM | 9020 | CZ2 | TRP | D | 725 | 136.265 | 49.322 | 37.125 | 1.00 | 0.00 | C |
| ATOM | 9021 | CZ3 | TRP | D | 725 | 134.061 | 50.260 | 37.329 | 1.00 | 0.00 | C |
| ATOM | 9022 | CH2 | TRP | D | 725 | 135.421 | 50.408 | 37.145 | 1.00 | 0.00 | C |
| ATOM | 9023 | N   | TYR | D | 726 | 130.560 | 44.180 | 39.372 | 1.00 | 0.00 | N |
| ATOM | 9024 | CA  | TYR | D | 726 | 129.199 | 43.748 | 39.411 | 1.00 | 0.00 | C |
| ATOM | 9025 | C   | TYR | D | 726 | 128.565 | 44.173 | 40.690 | 1.00 | 0.00 | C |
| ATOM | 9026 | O   | TYR | D | 726 | 127.439 | 44.670 | 40.684 | 1.00 | 0.00 | O |
| ATOM | 9027 | CB  | TYR | D | 726 | 129.001 | 42.227 | 39.340 | 1.00 | 0.00 | C |
| ATOM | 9028 | CG  | TYR | D | 726 | 127.630 | 42.047 | 39.895 | 1.00 | 0.00 | C |
| ATOM | 9029 | CD1 | TYR | D | 726 | 126.522 | 42.447 | 39.181 | 1.00 | 0.00 | C |
| ATOM | 9030 | CD2 | TYR | D | 726 | 127.461 | 41.480 | 41.137 | 1.00 | 0.00 | C |
| ATOM | 9031 | CE1 | TYR | D | 726 | 125.264 | 42.292 | 39.708 | 1.00 | 0.00 | C |
| ATOM | 9032 | CE2 | TYR | D | 726 | 126.207 | 41.322 | 41.669 | 1.00 | 0.00 | C |
| ATOM | 9033 | CZ  | TYR | D | 726 | 125.109 | 41.730 | 40.951 | 1.00 | 0.00 | C |
| ATOM | 9034 | OH  | TYR | D | 726 | 123.820 | 41.565 | 41.493 | 1.00 | 0.00 | O |
| ATOM | 9035 | N   | TYR | D | 727 | 129.259 | 43.993 | 41.824 | 1.00 | 0.00 | N |
| ATOM | 9036 | CA  | TYR | D | 727 | 128.643 | 44.331 | 43.073 | 1.00 | 0.00 | C |
| ATOM | 9037 | C   | TYR | D | 727 | 128.314 | 45.784 | 43.111 | 1.00 | 0.00 | C |
| ATOM | 9038 | O   | TYR | D | 727 | 127.222 | 46.156 | 43.542 | 1.00 | 0.00 | O |
| ATOM | 9039 | CB  | TYR | D | 727 | 129.501 | 43.993 | 44.306 | 1.00 | 0.00 | C |
| ATOM | 9040 | CG  | TYR | D | 727 | 129.327 | 42.540 | 44.576 | 1.00 | 0.00 | C |
| ATOM | 9041 | CD1 | TYR | D | 727 | 128.244 | 42.122 | 45.311 | 1.00 | 0.00 | C |
| ATOM | 9042 | CD2 | TYR | D | 727 | 130.215 | 41.600 | 44.108 | 1.00 | 0.00 | C |
| ATOM | 9043 | CE1 | TYR | D | 727 | 128.046 | 40.789 | 45.582 | 1.00 | 0.00 | C |
| ATOM | 9044 | CE2 | TYR | D | 727 | 130.024 | 40.264 | 44.375 | 1.00 | 0.00 | C |
| ATOM | 9045 | CZ  | TYR | D | 727 | 128.937 | 39.859 | 45.113 | 1.00 | 0.00 | C |
| ATOM | 9046 | OH  | TYR | D | 727 | 128.736 | 38.491 | 45.394 | 1.00 | 0.00 | O |
| ATOM | 9047 | N   | VAL | D | 728 | 129.228 | 46.657 | 42.660 | 1.00 | 0.00 | N |
| ATOM | 9048 | CA  | VAL | D | 728 | 128.919 | 48.054 | 42.747 | 1.00 | 0.00 | C |
| ATOM | 9049 | C   | VAL | D | 728 | 127.717 | 48.330 | 41.895 | 1.00 | 0.00 | C |
| ATOM | 9050 | O   | VAL | D | 728 | 126.818 | 49.066 | 42.299 | 1.00 | 0.00 | O |
| ATOM | 9051 | CB  | VAL | D | 728 | 130.040 | 48.955 | 42.302 | 1.00 | 0.00 | C |
| ATOM | 9052 | CG1 | VAL | D | 728 | 130.283 | 48.776 | 40.795 | 1.00 | 0.00 | C |
| ATOM | 9053 | CG2 | VAL | D | 728 | 129.681 | 50.398 | 42.699 | 1.00 | 0.00 | C |
| ATOM | 9054 | N   | ALA | D | 729 | 127.660 | 47.723 | 40.693 | 1.00 | 0.00 | N |
| ATOM | 9055 | CA  | ALA | D | 729 | 126.578 | 47.932 | 39.774 | 1.00 | 0.00 | C |
| ATOM | 9056 | C   | ALA | D | 729 | 125.312 | 47.457 | 40.407 | 1.00 | 0.00 | C |
| ATOM | 9057 | O   | ALA | D | 729 | 124.249 | 48.042 | 40.214 | 1.00 | 0.00 | O |

|      |      |     |     |       |         |        |        |      |      |   |
|------|------|-----|-----|-------|---------|--------|--------|------|------|---|
| ATOM | 9058 | CB  | ALA | D 729 | 126.752 | 47.166 | 38.451 | 1.00 | 0.00 | C |
| ATOM | 9059 | N   | PHE | D 730 | 125.385 | 46.349 | 41.167 | 1.00 | 0.00 | N |
| ATOM | 9060 | CA  | PHE | D 730 | 124.211 | 45.843 | 41.815 | 1.00 | 0.00 | C |
| ATOM | 9061 | C   | PHE | D 730 | 123.743 | 46.877 | 42.790 | 1.00 | 0.00 | C |
| ATOM | 9062 | O   | PHE | D 730 | 122.546 | 47.132 | 42.910 | 1.00 | 0.00 | O |
| ATOM | 9063 | CB  | PHE | D 730 | 124.472 | 44.543 | 42.597 | 1.00 | 0.00 | C |
| ATOM | 9064 | CG  | PHE | D 730 | 123.192 | 44.149 | 43.251 | 1.00 | 0.00 | C |
| ATOM | 9065 | CD1 | PHE | D 730 | 122.182 | 43.563 | 42.522 | 1.00 | 0.00 | C |
| ATOM | 9066 | CD2 | PHE | D 730 | 123.000 | 44.357 | 44.598 | 1.00 | 0.00 | C |
| ATOM | 9067 | CE1 | PHE | D 730 | 121.003 | 43.193 | 43.123 | 1.00 | 0.00 | C |
| ATOM | 9068 | CE2 | PHE | D 730 | 121.825 | 43.991 | 45.204 | 1.00 | 0.00 | C |
| ATOM | 9069 | CZ  | PHE | D 730 | 120.821 | 43.407 | 44.468 | 1.00 | 0.00 | C |
| ATOM | 9070 | N   | PHE | D 731 | 124.695 | 47.507 | 43.500 | 1.00 | 0.00 | N |
| ATOM | 9071 | CA  | PHE | D 731 | 124.412 | 48.495 | 44.499 | 1.00 | 0.00 | C |
| ATOM | 9072 | C   | PHE | D 731 | 123.779 | 49.701 | 43.885 | 1.00 | 0.00 | C |
| ATOM | 9073 | O   | PHE | D 731 | 123.010 | 50.392 | 44.547 | 1.00 | 0.00 | O |
| ATOM | 9074 | CB  | PHE | D 731 | 125.644 | 48.956 | 45.298 | 1.00 | 0.00 | C |
| ATOM | 9075 | CG  | PHE | D 731 | 125.926 | 47.921 | 46.337 | 1.00 | 0.00 | C |
| ATOM | 9076 | CD1 | PHE | D 731 | 125.217 | 47.928 | 47.514 | 1.00 | 0.00 | C |
| ATOM | 9077 | CD2 | PHE | D 731 | 126.890 | 46.960 | 46.146 | 1.00 | 0.00 | C |
| ATOM | 9078 | CE1 | PHE | D 731 | 125.458 | 46.988 | 48.491 | 1.00 | 0.00 | C |
| ATOM | 9079 | CE2 | PHE | D 731 | 127.136 | 46.017 | 47.117 | 1.00 | 0.00 | C |
| ATOM | 9080 | CZ  | PHE | D 731 | 126.420 | 46.028 | 48.290 | 1.00 | 0.00 | C |
| ATOM | 9081 | N   | THR | D 732 | 124.110 | 50.015 | 42.619 | 1.00 | 0.00 | N |
| ATOM | 9082 | CA  | THR | D 732 | 123.605 | 51.206 | 41.995 | 1.00 | 0.00 | C |
| ATOM | 9083 | C   | THR | D 732 | 122.109 | 51.174 | 41.848 | 1.00 | 0.00 | C |
| ATOM | 9084 | O   | THR | D 732 | 121.470 | 52.221 | 41.934 | 1.00 | 0.00 | O |
| ATOM | 9085 | CB  | THR | D 732 | 124.173 | 51.478 | 40.630 | 1.00 | 0.00 | C |
| ATOM | 9086 | CG2 | THR | D 732 | 125.711 | 51.464 | 40.729 | 1.00 | 0.00 | C |
| ATOM | 9087 | OG1 | THR | D 732 | 123.732 | 50.508 | 39.695 | 1.00 | 0.00 | O |
| ATOM | 9088 | N   | SER | D 733 | 121.493 | 49.997 | 41.609 | 1.00 | 0.00 | N |
| ATOM | 9089 | CA  | SER | D 733 | 120.078 | 49.965 | 41.329 | 1.00 | 0.00 | C |
| ATOM | 9090 | C   | SER | D 733 | 119.282 | 50.544 | 42.460 | 1.00 | 0.00 | C |
| ATOM | 9091 | O   | SER | D 733 | 119.490 | 50.245 | 43.633 | 1.00 | 0.00 | O |
| ATOM | 9092 | CB  | SER | D 733 | 119.531 | 48.552 | 41.042 | 1.00 | 0.00 | C |
| ATOM | 9093 | OG  | SER | D 733 | 119.607 | 47.747 | 42.208 | 1.00 | 0.00 | O |
| ATOM | 9094 | N   | PRO | D 734 | 118.361 | 51.400 | 42.089 | 1.00 | 0.00 | N |
| ATOM | 9095 | CA  | PRO | D 734 | 117.479 | 52.041 | 43.030 | 1.00 | 0.00 | C |
| ATOM | 9096 | C   | PRO | D 734 | 116.507 | 51.095 | 43.647 | 1.00 | 0.00 | C |
| ATOM | 9097 | O   | PRO | D 734 | 116.022 | 51.376 | 44.741 | 1.00 | 0.00 | O |
| ATOM | 9098 | CB  | PRO | D 734 | 116.799 | 53.175 | 42.267 | 1.00 | 0.00 | C |
| ATOM | 9099 | CG  | PRO | D 734 | 117.803 | 53.523 | 41.157 | 1.00 | 0.00 | C |
| ATOM | 9100 | CD  | PRO | D 734 | 118.551 | 52.206 | 40.892 | 1.00 | 0.00 | C |
| ATOM | 9101 | N   | PHE | D 735 | 116.174 | 49.989 | 42.953 | 1.00 | 0.00 | N |

|      |      |     |           |         |        |        |      |      |   |
|------|------|-----|-----------|---------|--------|--------|------|------|---|
| ATOM | 9102 | CA  | PHE D 735 | 115.237 | 49.054 | 43.496 | 1.00 | 0.00 | C |
| ATOM | 9103 | C   | PHE D 735 | 115.843 | 48.474 | 44.727 | 1.00 | 0.00 | C |
| ATOM | 9104 | O   | PHE D 735 | 115.197 | 48.387 | 45.771 | 1.00 | 0.00 | O |
| ATOM | 9105 | CB  | PHE D 735 | 114.930 | 47.889 | 42.536 | 1.00 | 0.00 | C |
| ATOM | 9106 | CG  | PHE D 735 | 113.952 | 46.986 | 43.212 | 1.00 | 0.00 | C |
| ATOM | 9107 | CD1 | PHE D 735 | 112.611 | 47.282 | 43.226 | 1.00 | 0.00 | C |
| ATOM | 9108 | CD2 | PHE D 735 | 114.386 | 45.835 | 43.828 | 1.00 | 0.00 | C |
| ATOM | 9109 | CE1 | PHE D 735 | 111.716 | 46.440 | 43.851 | 1.00 | 0.00 | C |
| ATOM | 9110 | CE2 | PHE D 735 | 113.501 | 44.991 | 44.455 | 1.00 | 0.00 | C |
| ATOM | 9111 | CZ  | PHE D 735 | 112.161 | 45.298 | 44.468 | 1.00 | 0.00 | C |
| ATOM | 9112 | N   | VAL D 736 | 117.123 | 48.069 | 44.638 | 1.00 | 0.00 | N |
| ATOM | 9113 | CA  | VAL D 736 | 117.757 | 47.481 | 45.776 | 1.00 | 0.00 | C |
| ATOM | 9114 | C   | VAL D 736 | 117.889 | 48.531 | 46.828 | 1.00 | 0.00 | C |
| ATOM | 9115 | O   | VAL D 736 | 117.723 | 48.259 | 48.013 | 1.00 | 0.00 | O |
| ATOM | 9116 | CB  | VAL D 736 | 119.121 | 46.912 | 45.499 | 1.00 | 0.00 | C |
| ATOM | 9117 | CG1 | VAL D 736 | 118.974 | 45.819 | 44.427 | 1.00 | 0.00 | C |
| ATOM | 9118 | CG2 | VAL D 736 | 120.099 | 48.039 | 45.140 | 1.00 | 0.00 | C |
| ATOM | 9119 | N   | VAL D 737 | 118.185 | 49.775 | 46.407 | 1.00 | 0.00 | N |
| ATOM | 9120 | CA  | VAL D 737 | 118.371 | 50.846 | 47.339 | 1.00 | 0.00 | C |
| ATOM | 9121 | C   | VAL D 737 | 117.096 | 51.056 | 48.092 | 1.00 | 0.00 | C |
| ATOM | 9122 | O   | VAL D 737 | 117.115 | 51.237 | 49.306 | 1.00 | 0.00 | O |
| ATOM | 9123 | CB  | VAL D 737 | 118.716 | 52.146 | 46.671 | 1.00 | 0.00 | C |
| ATOM | 9124 | CG1 | VAL D 737 | 118.796 | 53.245 | 47.743 | 1.00 | 0.00 | C |
| ATOM | 9125 | CG2 | VAL D 737 | 120.017 | 51.956 | 45.871 | 1.00 | 0.00 | C |
| ATOM | 9126 | N   | PHE D 738 | 115.953 | 51.030 | 47.384 | 1.00 | 0.00 | N |
| ATOM | 9127 | CA  | PHE D 738 | 114.690 | 51.268 | 48.020 | 1.00 | 0.00 | C |
| ATOM | 9128 | C   | PHE D 738 | 114.427 | 50.204 | 49.034 | 1.00 | 0.00 | C |
| ATOM | 9129 | O   | PHE D 738 | 114.065 | 50.499 | 50.171 | 1.00 | 0.00 | O |
| ATOM | 9130 | CB  | PHE D 738 | 113.512 | 51.255 | 47.030 | 1.00 | 0.00 | C |
| ATOM | 9131 | CG  | PHE D 738 | 112.274 | 51.486 | 47.824 | 1.00 | 0.00 | C |
| ATOM | 9132 | CD1 | PHE D 738 | 111.910 | 52.756 | 48.207 | 1.00 | 0.00 | C |
| ATOM | 9133 | CD2 | PHE D 738 | 111.473 | 50.428 | 48.181 | 1.00 | 0.00 | C |
| ATOM | 9134 | CE1 | PHE D 738 | 110.764 | 52.964 | 48.938 | 1.00 | 0.00 | C |
| ATOM | 9135 | CE2 | PHE D 738 | 110.325 | 50.631 | 48.911 | 1.00 | 0.00 | C |
| ATOM | 9136 | CZ  | PHE D 738 | 109.970 | 51.901 | 49.293 | 1.00 | 0.00 | C |
| ATOM | 9137 | N   | SER D 739 | 114.620 | 48.932 | 48.650 | 1.00 | 0.00 | N |
| ATOM | 9138 | CA  | SER D 739 | 114.340 | 47.842 | 49.541 | 1.00 | 0.00 | C |
| ATOM | 9139 | C   | SER D 739 | 115.265 | 47.944 | 50.709 | 1.00 | 0.00 | C |
| ATOM | 9140 | O   | SER D 739 | 114.878 | 47.683 | 51.849 | 1.00 | 0.00 | O |
| ATOM | 9141 | CB  | SER D 739 | 114.574 | 46.466 | 48.891 | 1.00 | 0.00 | C |
| ATOM | 9142 | OG  | SER D 739 | 115.944 | 46.304 | 48.553 | 1.00 | 0.00 | O |
| ATOM | 9143 | N   | TRP D 740 | 116.523 | 48.332 | 50.450 | 1.00 | 0.00 | N |
| ATOM | 9144 | CA  | TRP D 740 | 117.489 | 48.430 | 51.497 | 1.00 | 0.00 | C |
| ATOM | 9145 | C   | TRP D 740 | 117.067 | 49.499 | 52.450 | 1.00 | 0.00 | C |

|      |      |     |           |         |        |        |      |      |   |
|------|------|-----|-----------|---------|--------|--------|------|------|---|
| ATOM | 9146 | O   | TRP D 740 | 117.133 | 49.325 | 53.665 | 1.00 | 0.00 | O |
| ATOM | 9147 | CB  | TRP D 740 | 118.893 | 48.770 | 50.970 | 1.00 | 0.00 | C |
| ATOM | 9148 | CG  | TRP D 740 | 119.947 | 48.843 | 52.044 | 1.00 | 0.00 | C |
| ATOM | 9149 | CD1 | TRP D 740 | 120.497 | 49.930 | 52.658 | 1.00 | 0.00 | C |
| ATOM | 9150 | CD2 | TRP D 740 | 120.550 | 47.687 | 52.644 | 1.00 | 0.00 | C |
| ATOM | 9151 | CE2 | TRP D 740 | 121.456 | 48.143 | 53.599 | 1.00 | 0.00 | C |
| ATOM | 9152 | CE3 | TRP D 740 | 120.362 | 46.356 | 52.413 | 1.00 | 0.00 | C |
| ATOM | 9153 | NE1 | TRP D 740 | 121.415 | 49.523 | 53.597 | 1.00 | 0.00 | N |
| ATOM | 9154 | CZ2 | TRP D 740 | 122.190 | 47.269 | 54.349 | 1.00 | 0.00 | C |
| ATOM | 9155 | CZ3 | TRP D 740 | 121.106 | 45.474 | 53.167 | 1.00 | 0.00 | C |
| ATOM | 9156 | CH2 | TRP D 740 | 122.002 | 45.923 | 54.114 | 1.00 | 0.00 | C |
| ATOM | 9157 | N   | ASN D 741 | 116.601 | 50.642 | 51.913 | 1.00 | 0.00 | N |
| ATOM | 9158 | CA  | ASN D 741 | 116.241 | 51.748 | 52.750 | 1.00 | 0.00 | C |
| ATOM | 9159 | C   | ASN D 741 | 115.126 | 51.341 | 53.654 | 1.00 | 0.00 | C |
| ATOM | 9160 | O   | ASN D 741 | 115.167 | 51.621 | 54.851 | 1.00 | 0.00 | O |
| ATOM | 9161 | CB  | ASN D 741 | 115.764 | 52.970 | 51.947 | 1.00 | 0.00 | C |
| ATOM | 9162 | CG  | ASN D 741 | 116.963 | 53.544 | 51.203 | 1.00 | 0.00 | C |
| ATOM | 9163 | ND2 | ASN D 741 | 116.733 | 53.996 | 49.942 | 1.00 | 0.00 | N |
| ATOM | 9164 | OD1 | ASN D 741 | 118.077 | 53.583 | 51.727 | 1.00 | 0.00 | O |
| ATOM | 9165 | N   | VAL D 742 | 114.098 | 50.653 | 53.122 | 1.00 | 0.00 | N |
| ATOM | 9166 | CA  | VAL D 742 | 112.993 | 50.301 | 53.963 | 1.00 | 0.00 | C |
| ATOM | 9167 | C   | VAL D 742 | 113.468 | 49.369 | 55.035 | 1.00 | 0.00 | C |
| ATOM | 9168 | O   | VAL D 742 | 113.109 | 49.528 | 56.200 | 1.00 | 0.00 | O |
| ATOM | 9169 | CB  | VAL D 742 | 111.850 | 49.652 | 53.232 | 1.00 | 0.00 | C |
| ATOM | 9170 | CG1 | VAL D 742 | 111.282 | 50.667 | 52.225 | 1.00 | 0.00 | C |
| ATOM | 9171 | CG2 | VAL D 742 | 112.325 | 48.338 | 52.594 | 1.00 | 0.00 | C |
| ATOM | 9172 | N   | VAL D 743 | 114.304 | 48.380 | 54.678 | 1.00 | 0.00 | N |
| ATOM | 9173 | CA  | VAL D 743 | 114.749 | 47.427 | 55.654 | 1.00 | 0.00 | C |
| ATOM | 9174 | C   | VAL D 743 | 115.532 | 48.139 | 56.712 | 1.00 | 0.00 | C |
| ATOM | 9175 | O   | VAL D 743 | 115.339 | 47.906 | 57.905 | 1.00 | 0.00 | O |
| ATOM | 9176 | CB  | VAL D 743 | 115.643 | 46.373 | 55.075 | 1.00 | 0.00 | C |
| ATOM | 9177 | CG1 | VAL D 743 | 116.127 | 45.467 | 56.220 | 1.00 | 0.00 | C |
| ATOM | 9178 | CG2 | VAL D 743 | 114.875 | 45.623 | 53.971 | 1.00 | 0.00 | C |
| ATOM | 9179 | N   | PHE D 744 | 116.435 | 49.043 | 56.301 | 1.00 | 0.00 | N |
| ATOM | 9180 | CA  | PHE D 744 | 117.294 | 49.738 | 57.217 | 1.00 | 0.00 | C |
| ATOM | 9181 | C   | PHE D 744 | 116.467 | 50.594 | 58.115 | 1.00 | 0.00 | C |
| ATOM | 9182 | O   | PHE D 744 | 116.685 | 50.635 | 59.325 | 1.00 | 0.00 | O |
| ATOM | 9183 | CB  | PHE D 744 | 118.283 | 50.665 | 56.488 | 1.00 | 0.00 | C |
| ATOM | 9184 | CG  | PHE D 744 | 119.201 | 51.273 | 57.493 | 1.00 | 0.00 | C |
| ATOM | 9185 | CD1 | PHE D 744 | 120.355 | 50.621 | 57.859 | 1.00 | 0.00 | C |
| ATOM | 9186 | CD2 | PHE D 744 | 118.913 | 52.487 | 58.069 | 1.00 | 0.00 | C |
| ATOM | 9187 | CE1 | PHE D 744 | 121.211 | 51.174 | 58.782 | 1.00 | 0.00 | C |
| ATOM | 9188 | CE2 | PHE D 744 | 119.765 | 53.046 | 58.993 | 1.00 | 0.00 | C |
| ATOM | 9189 | CZ  | PHE D 744 | 120.919 | 52.390 | 59.351 | 1.00 | 0.00 | C |

|      |      |     |           |         |        |        |      |      |   |
|------|------|-----|-----------|---------|--------|--------|------|------|---|
| ATOM | 9190 | N   | TYR D 745 | 115.478 | 51.302 | 57.542 | 1.00 | 0.00 | N |
| ATOM | 9191 | CA  | TYR D 745 | 114.727 | 52.233 | 58.320 | 1.00 | 0.00 | C |
| ATOM | 9192 | C   | TYR D 745 | 113.972 | 51.488 | 59.369 | 1.00 | 0.00 | C |
| ATOM | 9193 | O   | TYR D 745 | 113.874 | 51.943 | 60.507 | 1.00 | 0.00 | O |
| ATOM | 9194 | CB  | TYR D 745 | 113.719 | 53.059 | 57.508 | 1.00 | 0.00 | C |
| ATOM | 9195 | CG  | TYR D 745 | 113.403 | 54.221 | 58.379 | 1.00 | 0.00 | C |
| ATOM | 9196 | CD1 | TYR D 745 | 112.506 | 54.124 | 59.414 | 1.00 | 0.00 | C |
| ATOM | 9197 | CD2 | TYR D 745 | 114.034 | 55.424 | 58.159 | 1.00 | 0.00 | C |
| ATOM | 9198 | CE1 | TYR D 745 | 112.238 | 55.217 | 60.210 | 1.00 | 0.00 | C |
| ATOM | 9199 | CE2 | TYR D 745 | 113.774 | 56.517 | 58.949 | 1.00 | 0.00 | C |
| ATOM | 9200 | CZ  | TYR D 745 | 112.870 | 56.412 | 59.978 | 1.00 | 0.00 | C |
| ATOM | 9201 | OH  | TYR D 745 | 112.598 | 57.532 | 60.791 | 1.00 | 0.00 | O |
| ATOM | 9202 | N   | ILE D 746 | 113.405 | 50.320 | 59.014 | 1.00 | 0.00 | N |
| ATOM | 9203 | CA  | ILE D 746 | 112.638 | 49.586 | 59.975 | 1.00 | 0.00 | C |
| ATOM | 9204 | C   | ILE D 746 | 113.556 | 49.176 | 61.077 | 1.00 | 0.00 | C |
| ATOM | 9205 | O   | ILE D 746 | 113.220 | 49.297 | 62.250 | 1.00 | 0.00 | O |
| ATOM | 9206 | CB  | ILE D 746 | 111.955 | 48.369 | 59.406 | 1.00 | 0.00 | C |
| ATOM | 9207 | CG1 | ILE D 746 | 112.914 | 47.234 | 59.000 | 1.00 | 0.00 | C |
| ATOM | 9208 | CG2 | ILE D 746 | 111.132 | 48.875 | 58.219 | 1.00 | 0.00 | C |
| ATOM | 9209 | CD1 | ILE D 746 | 113.363 | 46.341 | 60.158 | 1.00 | 0.00 | C |
| ATOM | 9210 | N   | ALA D 747 | 114.769 | 48.715 | 60.727 | 1.00 | 0.00 | N |
| ATOM | 9211 | CA  | ALA D 747 | 115.681 | 48.242 | 61.723 | 1.00 | 0.00 | C |
| ATOM | 9212 | C   | ALA D 747 | 115.975 | 49.382 | 62.640 | 1.00 | 0.00 | C |
| ATOM | 9213 | O   | ALA D 747 | 116.042 | 49.216 | 63.856 | 1.00 | 0.00 | O |
| ATOM | 9214 | CB  | ALA D 747 | 117.020 | 47.766 | 61.132 | 1.00 | 0.00 | C |
| ATOM | 9215 | N   | PHE D 748 | 116.137 | 50.580 | 62.061 | 1.00 | 0.00 | N |
| ATOM | 9216 | CA  | PHE D 748 | 116.456 | 51.749 | 62.820 | 1.00 | 0.00 | C |
| ATOM | 9217 | C   | PHE D 748 | 115.327 | 52.007 | 63.768 | 1.00 | 0.00 | C |
| ATOM | 9218 | O   | PHE D 748 | 115.546 | 52.329 | 64.934 | 1.00 | 0.00 | O |
| ATOM | 9219 | CB  | PHE D 748 | 116.628 | 52.989 | 61.923 | 1.00 | 0.00 | C |
| ATOM | 9220 | CG  | PHE D 748 | 116.955 | 54.158 | 62.783 | 1.00 | 0.00 | C |
| ATOM | 9221 | CD1 | PHE D 748 | 118.247 | 54.380 | 63.203 | 1.00 | 0.00 | C |
| ATOM | 9222 | CD2 | PHE D 748 | 115.970 | 55.041 | 63.160 | 1.00 | 0.00 | C |
| ATOM | 9223 | CE1 | PHE D 748 | 118.548 | 55.464 | 63.995 | 1.00 | 0.00 | C |
| ATOM | 9224 | CE2 | PHE D 748 | 116.267 | 56.126 | 63.950 | 1.00 | 0.00 | C |
| ATOM | 9225 | CZ  | PHE D 748 | 117.557 | 56.339 | 64.368 | 1.00 | 0.00 | C |
| ATOM | 9226 | N   | LEU D 749 | 114.079 | 51.855 | 63.283 | 1.00 | 0.00 | N |
| ATOM | 9227 | CA  | LEU D 749 | 112.927 | 52.143 | 64.086 | 1.00 | 0.00 | C |
| ATOM | 9228 | C   | LEU D 749 | 112.878 | 51.214 | 65.261 | 1.00 | 0.00 | C |
| ATOM | 9229 | O   | LEU D 749 | 112.618 | 51.637 | 66.386 | 1.00 | 0.00 | O |
| ATOM | 9230 | CB  | LEU D 749 | 111.613 | 51.998 | 63.302 | 1.00 | 0.00 | C |
| ATOM | 9231 | CG  | LEU D 749 | 110.375 | 52.368 | 64.135 | 1.00 | 0.00 | C |
| ATOM | 9232 | CD1 | LEU D 749 | 110.460 | 53.826 | 64.601 | 1.00 | 0.00 | C |
| ATOM | 9233 | CD2 | LEU D 749 | 109.072 | 52.076 | 63.380 | 1.00 | 0.00 | C |



|      |      |     |           |         |        |        |      |      |   |
|------|------|-----|-----------|---------|--------|--------|------|------|---|
| ATOM | 9234 | N   | LEU D 750 | 113.141 | 49.916 | 65.032 | 1.00 | 0.00 | N |
| ATOM | 9235 | CA  | LEU D 750 | 113.082 | 48.938 | 66.079 | 1.00 | 0.00 | C |
| ATOM | 9236 | C   | LEU D 750 | 114.127 | 49.233 | 67.113 | 1.00 | 0.00 | C |
| ATOM | 9237 | O   | LEU D 750 | 113.855 | 49.158 | 68.309 | 1.00 | 0.00 | O |
| ATOM | 9238 | CB  | LEU D 750 | 113.299 | 47.515 | 65.539 | 1.00 | 0.00 | C |
| ATOM | 9239 | CG  | LEU D 750 | 112.058 | 46.938 | 64.826 | 1.00 | 0.00 | C |
| ATOM | 9240 | CD1 | LEU D 750 | 111.453 | 47.912 | 63.808 | 1.00 | 0.00 | C |
| ATOM | 9241 | CD2 | LEU D 750 | 112.402 | 45.599 | 64.163 | 1.00 | 0.00 | C |
| ATOM | 9242 | N   | LEU D 751 | 115.347 | 49.598 | 66.678 | 1.00 | 0.00 | N |
| ATOM | 9243 | CA  | LEU D 751 | 116.409 | 49.867 | 67.604 | 1.00 | 0.00 | C |
| ATOM | 9244 | C   | LEU D 751 | 116.019 | 51.051 | 68.430 | 1.00 | 0.00 | C |
| ATOM | 9245 | O   | LEU D 751 | 116.294 | 51.109 | 69.626 | 1.00 | 0.00 | O |
| ATOM | 9246 | CB  | LEU D 751 | 117.740 | 50.218 | 66.912 | 1.00 | 0.00 | C |
| ATOM | 9247 | CG  | LEU D 751 | 118.342 | 49.058 | 66.101 | 1.00 | 0.00 | C |
| ATOM | 9248 | CD1 | LEU D 751 | 119.671 | 49.467 | 65.444 | 1.00 | 0.00 | C |
| ATOM | 9249 | CD2 | LEU D 751 | 118.466 | 47.782 | 66.954 | 1.00 | 0.00 | C |
| ATOM | 9250 | N   | PHE D 752 | 115.353 | 52.024 | 67.790 | 1.00 | 0.00 | N |
| ATOM | 9251 | CA  | PHE D 752 | 114.941 | 53.250 | 68.406 | 1.00 | 0.00 | C |
| ATOM | 9252 | C   | PHE D 752 | 113.985 | 52.930 | 69.516 | 1.00 | 0.00 | C |
| ATOM | 9253 | O   | PHE D 752 | 114.094 | 53.472 | 70.613 | 1.00 | 0.00 | O |
| ATOM | 9254 | CB  | PHE D 752 | 114.219 | 54.138 | 67.375 | 1.00 | 0.00 | C |
| ATOM | 9255 | CG  | PHE D 752 | 113.929 | 55.488 | 67.933 | 1.00 | 0.00 | C |
| ATOM | 9256 | CD1 | PHE D 752 | 114.898 | 56.464 | 67.932 | 1.00 | 0.00 | C |
| ATOM | 9257 | CD2 | PHE D 752 | 112.683 | 55.784 | 68.437 | 1.00 | 0.00 | C |
| ATOM | 9258 | CE1 | PHE D 752 | 114.637 | 57.712 | 68.439 | 1.00 | 0.00 | C |
| ATOM | 9259 | CE2 | PHE D 752 | 112.414 | 57.035 | 68.944 | 1.00 | 0.00 | C |
| ATOM | 9260 | CZ  | PHE D 752 | 113.391 | 58.002 | 68.943 | 1.00 | 0.00 | C |
| ATOM | 9261 | N   | ALA D 753 | 113.016 | 52.033 | 69.249 | 1.00 | 0.00 | N |
| ATOM | 9262 | CA  | ALA D 753 | 112.032 | 51.657 | 70.222 | 1.00 | 0.00 | C |
| ATOM | 9263 | C   | ALA D 753 | 112.715 | 50.974 | 71.364 | 1.00 | 0.00 | C |
| ATOM | 9264 | O   | ALA D 753 | 112.380 | 51.198 | 72.524 | 1.00 | 0.00 | O |
| ATOM | 9265 | CB  | ALA D 753 | 110.976 | 50.688 | 69.658 | 1.00 | 0.00 | C |
| ATOM | 9266 | N   | TYR D 754 | 113.715 | 50.131 | 71.050 | 1.00 | 0.00 | N |
| ATOM | 9267 | CA  | TYR D 754 | 114.424 | 49.382 | 72.048 | 1.00 | 0.00 | C |
| ATOM | 9268 | C   | TYR D 754 | 115.063 | 50.363 | 72.967 | 1.00 | 0.00 | C |
| ATOM | 9269 | O   | TYR D 754 | 115.043 | 50.193 | 74.187 | 1.00 | 0.00 | O |
| ATOM | 9270 | CB  | TYR D 754 | 115.544 | 48.516 | 71.438 | 1.00 | 0.00 | C |
| ATOM | 9271 | CG  | TYR D 754 | 116.281 | 47.831 | 72.540 | 1.00 | 0.00 | C |
| ATOM | 9272 | CD1 | TYR D 754 | 115.748 | 46.725 | 73.160 | 1.00 | 0.00 | C |
| ATOM | 9273 | CD2 | TYR D 754 | 117.515 | 48.286 | 72.943 | 1.00 | 0.00 | C |
| ATOM | 9274 | CE1 | TYR D 754 | 116.428 | 46.090 | 74.171 | 1.00 | 0.00 | C |
| ATOM | 9275 | CE2 | TYR D 754 | 118.203 | 47.654 | 73.955 | 1.00 | 0.00 | C |
| ATOM | 9276 | CZ  | TYR D 754 | 117.657 | 46.555 | 74.570 | 1.00 | 0.00 | C |
| ATOM | 9277 | OH  | TYR D 754 | 118.358 | 45.906 | 75.610 | 1.00 | 0.00 | O |

|      |      |     |           |         |        |        |      |      |   |
|------|------|-----|-----------|---------|--------|--------|------|------|---|
| ATOM | 9278 | N   | VAL D 755 | 115.643 | 51.430 | 72.393 | 1.00 | 0.00 | N |
| ATOM | 9279 | CA  | VAL D 755 | 116.304 | 52.435 | 73.164 | 1.00 | 0.00 | C |
| ATOM | 9280 | C   | VAL D 755 | 115.298 | 53.076 | 74.061 | 1.00 | 0.00 | C |
| ATOM | 9281 | O   | VAL D 755 | 115.609 | 53.431 | 75.197 | 1.00 | 0.00 | O |
| ATOM | 9282 | CB  | VAL D 755 | 116.900 | 53.516 | 72.315 | 1.00 | 0.00 | C |
| ATOM | 9283 | CG1 | VAL D 755 | 117.513 | 54.571 | 73.249 | 1.00 | 0.00 | C |
| ATOM | 9284 | CG2 | VAL D 755 | 117.902 | 52.878 | 71.340 | 1.00 | 0.00 | C |
| ATOM | 9285 | N   | LEU D 756 | 114.051 | 53.243 | 73.578 | 1.00 | 0.00 | N |
| ATOM | 9286 | CA  | LEU D 756 | 113.043 | 53.906 | 74.354 | 1.00 | 0.00 | C |
| ATOM | 9287 | C   | LEU D 756 | 112.866 | 53.178 | 75.646 | 1.00 | 0.00 | C |
| ATOM | 9288 | O   | LEU D 756 | 112.869 | 53.788 | 76.713 | 1.00 | 0.00 | O |
| ATOM | 9289 | CB  | LEU D 756 | 111.659 | 53.867 | 73.677 | 1.00 | 0.00 | C |
| ATOM | 9290 | CG  | LEU D 756 | 111.516 | 54.763 | 72.433 | 1.00 | 0.00 | C |
| ATOM | 9291 | CD1 | LEU D 756 | 110.123 | 54.631 | 71.800 | 1.00 | 0.00 | C |
| ATOM | 9292 | CD2 | LEU D 756 | 111.833 | 56.217 | 72.790 | 1.00 | 0.00 | C |
| ATOM | 9293 | N   | LEU D 757 | 112.711 | 51.846 | 75.577 | 1.00 | 0.00 | N |
| ATOM | 9294 | CA  | LEU D 757 | 112.491 | 51.064 | 76.757 | 1.00 | 0.00 | C |
| ATOM | 9295 | C   | LEU D 757 | 113.747 | 51.101 | 77.583 | 1.00 | 0.00 | C |
| ATOM | 9296 | O   | LEU D 757 | 113.709 | 51.204 | 78.806 | 1.00 | 0.00 | O |
| ATOM | 9297 | CB  | LEU D 757 | 112.181 | 49.595 | 76.406 | 1.00 | 0.00 | C |
| ATOM | 9298 | CG  | LEU D 757 | 111.637 | 48.711 | 77.551 | 1.00 | 0.00 | C |
| ATOM | 9299 | CD1 | LEU D 757 | 111.374 | 47.283 | 77.051 | 1.00 | 0.00 | C |
| ATOM | 9300 | CD2 | LEU D 757 | 112.521 | 48.731 | 78.807 | 1.00 | 0.00 | C |
| ATOM | 9301 | N   | MET D 758 | 114.891 | 51.032 | 76.882 | 1.00 | 0.00 | N |
| ATOM | 9302 | CA  | MET D 758 | 116.240 | 50.927 | 77.359 | 1.00 | 0.00 | C |
| ATOM | 9303 | C   | MET D 758 | 116.710 | 52.162 | 78.079 | 1.00 | 0.00 | C |
| ATOM | 9304 | O   | MET D 758 | 117.611 | 52.076 | 78.915 | 1.00 | 0.00 | O |
| ATOM | 9305 | CB  | MET D 758 | 117.209 | 50.677 | 76.192 | 1.00 | 0.00 | C |
| ATOM | 9306 | CG  | MET D 758 | 118.646 | 50.384 | 76.613 | 1.00 | 0.00 | C |
| ATOM | 9307 | SD  | MET D 758 | 119.783 | 50.089 | 75.223 | 1.00 | 0.00 | S |
| ATOM | 9308 | CE  | MET D 758 | 121.244 | 49.820 | 76.266 | 1.00 | 0.00 | C |
| ATOM | 9309 | N   | ASP D 759 | 116.127 | 53.333 | 77.765 | 1.00 | 0.00 | N |
| ATOM | 9310 | CA  | ASP D 759 | 116.591 | 54.631 | 78.195 | 1.00 | 0.00 | C |
| ATOM | 9311 | C   | ASP D 759 | 117.049 | 54.662 | 79.624 | 1.00 | 0.00 | C |
| ATOM | 9312 | O   | ASP D 759 | 116.463 | 54.040 | 80.512 | 1.00 | 0.00 | O |
| ATOM | 9313 | CB  | ASP D 759 | 115.517 | 55.725 | 78.024 | 1.00 | 0.00 | C |
| ATOM | 9314 | CG  | ASP D 759 | 116.172 | 57.097 | 78.107 | 1.00 | 0.00 | C |
| ATOM | 9315 | OD1 | ASP D 759 | 117.430 | 57.162 | 78.067 | 1.00 | 0.00 | O |
| ATOM | 9316 | OD2 | ASP D 759 | 115.418 | 58.102 | 78.207 | 1.00 | 0.00 | O |
| ATOM | 9317 | N   | PHE D 760 | 118.165 | 55.393 | 79.852 | 1.00 | 0.00 | N |
| ATOM | 9318 | CA  | PHE D 760 | 118.774 | 55.562 | 81.140 | 1.00 | 0.00 | C |
| ATOM | 9319 | C   | PHE D 760 | 118.941 | 57.041 | 81.337 | 1.00 | 0.00 | C |
| ATOM | 9320 | O   | PHE D 760 | 118.977 | 57.801 | 80.371 | 1.00 | 0.00 | O |
| ATOM | 9321 | CB  | PHE D 760 | 120.158 | 54.890 | 81.224 | 1.00 | 0.00 | C |

|        |      |     |           |         |        |        |      |      |   |
|--------|------|-----|-----------|---------|--------|--------|------|------|---|
| ATOM   | 9322 | CG  | PHE D 760 | 120.636 | 54.932 | 82.634 | 1.00 | 0.00 | C |
| ATOM   | 9323 | CD1 | PHE D 760 | 120.159 | 54.038 | 83.563 | 1.00 | 0.00 | C |
| ATOM   | 9324 | CD2 | PHE D 760 | 121.576 | 55.856 | 83.029 | 1.00 | 0.00 | C |
| ATOM   | 9325 | CE1 | PHE D 760 | 120.602 | 54.074 | 84.865 | 1.00 | 0.00 | C |
| ATOM   | 9326 | CE2 | PHE D 760 | 122.025 | 55.898 | 84.325 | 1.00 | 0.00 | C |
| ATOM   | 9327 | CZ  | PHE D 760 | 121.537 | 55.006 | 85.250 | 1.00 | 0.00 | C |
| HETATM | 9328 | N   | HIE D 761 | 119.027 | 57.498 | 82.605 | 1.00 | 0.00 | N |
| HETATM | 9329 | CA  | HIE D 761 | 119.136 | 58.904 | 82.878 | 1.00 | 0.00 | C |
| HETATM | 9330 | C   | HIE D 761 | 120.530 | 59.357 | 82.599 | 1.00 | 0.00 | C |
| HETATM | 9331 | O   | HIE D 761 | 121.469 | 58.565 | 82.647 | 1.00 | 0.00 | O |
| HETATM | 9332 | CB  | HIE D 761 | 118.809 | 59.285 | 84.333 | 1.00 | 0.00 | C |
| HETATM | 9333 | CG  | HIE D 761 | 118.774 | 60.770 | 84.547 | 1.00 | 0.00 | C |
| HETATM | 9334 | CD2 | HIE D 761 | 117.725 | 61.636 | 84.507 | 1.00 | 0.00 | C |
| HETATM | 9335 | ND1 | HIE D 761 | 119.881 | 61.540 | 84.826 | 1.00 | 0.00 | N |
| HETATM | 9336 | CE1 | HIE D 761 | 119.452 | 62.821 | 84.934 | 1.00 | 0.00 | C |
| HETATM | 9337 | NE2 | HIE D 761 | 118.149 | 62.929 | 84.750 | 1.00 | 0.00 | N |
| ATOM   | 9338 | N   | SER D 762 | 120.690 | 60.648 | 82.244 | 1.00 | 0.00 | N |
| ATOM   | 9339 | CA  | SER D 762 | 121.998 | 61.196 | 82.030 | 1.00 | 0.00 | C |
| ATOM   | 9340 | C   | SER D 762 | 122.456 | 60.807 | 80.667 | 1.00 | 0.00 | C |
| ATOM   | 9341 | O   | SER D 762 | 121.665 | 60.707 | 79.732 | 1.00 | 0.00 | O |
| ATOM   | 9342 | CB  | SER D 762 | 123.071 | 60.745 | 83.040 | 1.00 | 0.00 | C |
| ATOM   | 9343 | OG  | SER D 762 | 122.748 | 61.214 | 84.339 | 1.00 | 0.00 | O |
| ATOM   | 9344 | N   | VAL D 763 | 123.780 | 60.604 | 80.533 | 1.00 | 0.00 | N |
| ATOM   | 9345 | CA  | VAL D 763 | 124.357 | 60.260 | 79.270 | 1.00 | 0.00 | C |
| ATOM   | 9346 | C   | VAL D 763 | 123.841 | 58.918 | 78.858 | 1.00 | 0.00 | C |
| ATOM   | 9347 | O   | VAL D 763 | 123.705 | 57.990 | 79.655 | 1.00 | 0.00 | O |
| ATOM   | 9348 | CB  | VAL D 763 | 125.856 | 60.184 | 79.298 | 1.00 | 0.00 | C |
| ATOM   | 9349 | CG1 | VAL D 763 | 126.271 | 59.078 | 80.279 | 1.00 | 0.00 | C |
| ATOM   | 9350 | CG2 | VAL D 763 | 126.361 | 59.961 | 77.862 | 1.00 | 0.00 | C |
| ATOM   | 9351 | N   | PRO D 764 | 123.518 | 58.862 | 77.595 | 1.00 | 0.00 | N |
| ATOM   | 9352 | CA  | PRO D 764 | 123.016 | 57.645 | 77.009 | 1.00 | 0.00 | C |
| ATOM   | 9353 | C   | PRO D 764 | 124.104 | 56.675 | 76.691 | 1.00 | 0.00 | C |
| ATOM   | 9354 | O   | PRO D 764 | 125.274 | 57.053 | 76.705 | 1.00 | 0.00 | O |
| ATOM   | 9355 | CB  | PRO D 764 | 122.239 | 58.066 | 75.763 | 1.00 | 0.00 | C |
| ATOM   | 9356 | CG  | PRO D 764 | 121.797 | 59.502 | 76.070 | 1.00 | 0.00 | C |
| ATOM   | 9357 | CD  | PRO D 764 | 122.892 | 60.037 | 77.004 | 1.00 | 0.00 | C |
| HETATM | 9358 | N   | HIE D 765 | 123.726 | 55.416 | 76.397 | 1.00 | 0.00 | N |
| HETATM | 9359 | CA  | HIE D 765 | 124.672 | 54.396 | 76.057 | 1.00 | 0.00 | C |
| HETATM | 9360 | C   | HIE D 765 | 125.094 | 54.678 | 74.646 | 1.00 | 0.00 | C |
| HETATM | 9361 | O   | HIE D 765 | 124.447 | 55.447 | 73.936 | 1.00 | 0.00 | O |
| HETATM | 9362 | CB  | HIE D 765 | 124.079 | 52.976 | 76.151 | 1.00 | 0.00 | C |
| HETATM | 9363 | CG  | HIE D 765 | 125.115 | 51.908 | 76.362 | 1.00 | 0.00 | C |
| HETATM | 9364 | CD2 | HIE D 765 | 125.604 | 50.956 | 75.526 | 1.00 | 0.00 | C |
| HETATM | 9365 | ND1 | HIE D 765 | 125.770 | 51.727 | 77.560 | 1.00 | 0.00 | N |

|        |      |     |           |         |        |        |      |      |   |
|--------|------|-----|-----------|---------|--------|--------|------|------|---|
| HETATM | 9366 | CEI | HIE D 765 | 126.617 | 50.682 | 77.390 | 1.00 | 0.00 | C |
| HETATM | 9367 | NE2 | HIE D 765 | 126.551 | 50.179 | 76.170 | 1.00 | 0.00 | N |
| ATOM   | 9368 | N   | PRO D 766 | 126.192 | 54.111 | 74.224 | 1.00 | 0.00 | N |
| ATOM   | 9369 | CA  | PRO D 766 | 126.698 | 54.402 | 72.911 | 1.00 | 0.00 | C |
| ATOM   | 9370 | C   | PRO D 766 | 125.793 | 54.034 | 71.777 | 1.00 | 0.00 | C |
| ATOM   | 9371 | O   | PRO D 766 | 125.889 | 54.696 | 70.746 | 1.00 | 0.00 | O |
| ATOM   | 9372 | CB  | PRO D 766 | 128.081 | 53.760 | 72.857 | 1.00 | 0.00 | C |
| ATOM   | 9373 | CG  | PRO D 766 | 128.552 | 53.810 | 74.322 | 1.00 | 0.00 | C |
| ATOM   | 9374 | CD  | PRO D 766 | 127.256 | 53.751 | 75.147 | 1.00 | 0.00 | C |
| ATOM   | 9375 | N   | PRO D 767 | 124.967 | 53.033 | 71.876 | 1.00 | 0.00 | N |
| ATOM   | 9376 | CA  | PRO D 767 | 124.105 | 52.748 | 70.763 | 1.00 | 0.00 | C |
| ATOM   | 9377 | C   | PRO D 767 | 123.125 | 53.850 | 70.550 | 1.00 | 0.00 | C |
| ATOM   | 9378 | O   | PRO D 767 | 122.723 | 54.079 | 69.409 | 1.00 | 0.00 | O |
| ATOM   | 9379 | CB  | PRO D 767 | 123.493 | 51.383 | 71.060 | 1.00 | 0.00 | C |
| ATOM   | 9380 | CG  | PRO D 767 | 124.586 | 50.682 | 71.890 | 1.00 | 0.00 | C |
| ATOM   | 9381 | CD  | PRO D 767 | 125.328 | 51.829 | 72.600 | 1.00 | 0.00 | C |
| ATOM   | 9382 | N   | GLU D 768 | 122.715 | 54.533 | 71.635 | 1.00 | 0.00 | N |
| ATOM   | 9383 | CA  | GLU D 768 | 121.798 | 55.626 | 71.510 | 1.00 | 0.00 | C |
| ATOM   | 9384 | C   | GLU D 768 | 122.493 | 56.708 | 70.758 | 1.00 | 0.00 | C |
| ATOM   | 9385 | O   | GLU D 768 | 121.904 | 57.367 | 69.906 | 1.00 | 0.00 | O |
| ATOM   | 9386 | CB  | GLU D 768 | 121.367 | 56.203 | 72.869 | 1.00 | 0.00 | C |
| ATOM   | 9387 | CG  | GLU D 768 | 120.398 | 57.381 | 72.753 | 1.00 | 0.00 | C |
| ATOM   | 9388 | CD  | GLU D 768 | 119.070 | 56.860 | 72.232 | 1.00 | 0.00 | C |
| ATOM   | 9389 | OE1 | GLU D 768 | 119.093 | 56.066 | 71.252 | 1.00 | 0.00 | O |
| ATOM   | 9390 | OE2 | GLU D 768 | 118.014 | 57.243 | 72.807 | 1.00 | 0.00 | O |
| ATOM   | 9391 | N   | LEU D 769 | 123.790 | 56.907 | 71.057 | 1.00 | 0.00 | N |
| ATOM   | 9392 | CA  | LEU D 769 | 124.549 | 57.930 | 70.400 | 1.00 | 0.00 | C |
| ATOM   | 9393 | C   | LEU D 769 | 124.595 | 57.597 | 68.955 | 1.00 | 0.00 | C |
| ATOM   | 9394 | O   | LEU D 769 | 124.493 | 58.475 | 68.099 | 1.00 | 0.00 | O |
| ATOM   | 9395 | CB  | LEU D 769 | 125.996 | 58.034 | 70.902 | 1.00 | 0.00 | C |
| ATOM   | 9396 | CG  | LEU D 769 | 126.072 | 58.586 | 72.330 | 1.00 | 0.00 | C |
| ATOM   | 9397 | CD1 | LEU D 769 | 127.522 | 58.740 | 72.811 | 1.00 | 0.00 | C |
| ATOM   | 9398 | CD2 | LEU D 769 | 125.256 | 59.884 | 72.430 | 1.00 | 0.00 | C |
| ATOM   | 9399 | N   | VAL D 770 | 124.730 | 56.300 | 68.644 | 1.00 | 0.00 | N |
| ATOM   | 9400 | CA  | VAL D 770 | 124.798 | 55.902 | 67.274 | 1.00 | 0.00 | C |
| ATOM   | 9401 | C   | VAL D 770 | 123.525 | 56.323 | 66.625 | 1.00 | 0.00 | C |
| ATOM   | 9402 | O   | VAL D 770 | 123.527 | 56.840 | 65.510 | 1.00 | 0.00 | O |
| ATOM   | 9403 | CB  | VAL D 770 | 124.924 | 54.419 | 67.097 | 1.00 | 0.00 | C |
| ATOM   | 9404 | CG1 | VAL D 770 | 124.904 | 54.108 | 65.591 | 1.00 | 0.00 | C |
| ATOM   | 9405 | CG2 | VAL D 770 | 126.195 | 53.944 | 67.818 | 1.00 | 0.00 | C |
| ATOM   | 9406 | N   | LEU D 771 | 122.393 | 56.146 | 67.327 | 1.00 | 0.00 | N |
| ATOM   | 9407 | CA  | LEU D 771 | 121.118 | 56.480 | 66.765 | 1.00 | 0.00 | C |
| ATOM   | 9408 | C   | LEU D 771 | 121.111 | 57.942 | 66.463 | 1.00 | 0.00 | C |
| ATOM   | 9409 | O   | LEU D 771 | 120.559 | 58.369 | 65.450 | 1.00 | 0.00 | O |

|      |      |     |     |   |     |         |        |        |      |      |   |
|------|------|-----|-----|---|-----|---------|--------|--------|------|------|---|
| ATOM | 9410 | CB  | LEU | D | 771 | 119.944 | 56.190 | 67.714 | 1.00 | 0.00 | C |
| ATOM | 9411 | CG  | LEU | D | 771 | 119.785 | 54.691 | 68.027 | 1.00 | 0.00 | C |
| ATOM | 9412 | CD1 | LEU | D | 771 | 118.545 | 54.429 | 68.899 | 1.00 | 0.00 | C |
| ATOM | 9413 | CD2 | LEU | D | 771 | 119.790 | 53.848 | 66.740 | 1.00 | 0.00 | C |
| ATOM | 9414 | N   | TYR | D | 772 | 121.735 | 58.754 | 67.336 | 1.00 | 0.00 | N |
| ATOM | 9415 | CA  | TYR | D | 772 | 121.752 | 60.165 | 67.096 | 1.00 | 0.00 | C |
| ATOM | 9416 | C   | TYR | D | 772 | 122.438 | 60.388 | 65.790 | 1.00 | 0.00 | C |
| ATOM | 9417 | O   | TYR | D | 772 | 122.003 | 61.202 | 64.979 | 1.00 | 0.00 | O |
| ATOM | 9418 | CB  | TYR | D | 772 | 122.509 | 60.961 | 68.172 | 1.00 | 0.00 | C |
| ATOM | 9419 | CG  | TYR | D | 772 | 121.686 | 60.915 | 69.416 | 1.00 | 0.00 | C |
| ATOM | 9420 | CD1 | TYR | D | 772 | 120.598 | 61.746 | 69.549 | 1.00 | 0.00 | C |
| ATOM | 9421 | CD2 | TYR | D | 772 | 122.003 | 60.058 | 70.443 | 1.00 | 0.00 | C |
| ATOM | 9422 | CE1 | TYR | D | 772 | 119.833 | 61.717 | 70.690 | 1.00 | 0.00 | C |
| ATOM | 9423 | CE2 | TYR | D | 772 | 121.238 | 60.026 | 71.584 | 1.00 | 0.00 | C |
| ATOM | 9424 | CZ  | TYR | D | 772 | 120.150 | 60.855 | 71.708 | 1.00 | 0.00 | C |
| ATOM | 9425 | OH  | TYR | D | 772 | 119.364 | 60.827 | 72.879 | 1.00 | 0.00 | O |
| ATOM | 9426 | N   | SER | D | 773 | 123.525 | 59.640 | 65.554 | 1.00 | 0.00 | N |
| ATOM | 9427 | CA  | SER | D | 773 | 124.283 | 59.765 | 64.346 | 1.00 | 0.00 | C |
| ATOM | 9428 | C   | SER | D | 773 | 123.384 | 59.477 | 63.182 | 1.00 | 0.00 | C |
| ATOM | 9429 | O   | SER | D | 773 | 123.401 | 60.200 | 62.187 | 1.00 | 0.00 | O |
| ATOM | 9430 | CB  | SER | D | 773 | 125.433 | 58.750 | 64.308 | 1.00 | 0.00 | C |
| ATOM | 9431 | OG  | SER | D | 773 | 126.029 | 58.743 | 63.023 | 1.00 | 0.00 | O |
| ATOM | 9432 | N   | LEU | D | 774 | 122.557 | 58.417 | 63.284 | 1.00 | 0.00 | N |
| ATOM | 9433 | CA  | LEU | D | 774 | 121.679 | 58.067 | 62.204 | 1.00 | 0.00 | C |
| ATOM | 9434 | C   | LEU | D | 774 | 120.708 | 59.180 | 61.980 | 1.00 | 0.00 | C |
| ATOM | 9435 | O   | LEU | D | 774 | 120.359 | 59.489 | 60.842 | 1.00 | 0.00 | O |
| ATOM | 9436 | CB  | LEU | D | 774 | 120.872 | 56.776 | 62.443 | 1.00 | 0.00 | C |
| ATOM | 9437 | CG  | LEU | D | 774 | 121.688 | 55.476 | 62.287 | 1.00 | 0.00 | C |
| ATOM | 9438 | CD1 | LEU | D | 774 | 122.132 | 55.272 | 60.829 | 1.00 | 0.00 | C |
| ATOM | 9439 | CD2 | LEU | D | 774 | 122.866 | 55.412 | 63.268 | 1.00 | 0.00 | C |
| ATOM | 9440 | N   | VAL | D | 775 | 120.242 | 59.823 | 63.061 | 1.00 | 0.00 | N |
| ATOM | 9441 | CA  | VAL | D | 775 | 119.308 | 60.901 | 62.902 | 1.00 | 0.00 | C |
| ATOM | 9442 | C   | VAL | D | 775 | 119.989 | 61.949 | 62.085 | 1.00 | 0.00 | C |
| ATOM | 9443 | O   | VAL | D | 775 | 119.376 | 62.572 | 61.217 | 1.00 | 0.00 | O |
| ATOM | 9444 | CB  | VAL | D | 775 | 118.928 | 61.519 | 64.215 | 1.00 | 0.00 | C |
| ATOM | 9445 | CG1 | VAL | D | 775 | 118.039 | 62.741 | 63.944 | 1.00 | 0.00 | C |
| ATOM | 9446 | CG2 | VAL | D | 775 | 118.255 | 60.442 | 65.086 | 1.00 | 0.00 | C |
| ATOM | 9447 | N   | PHE | D | 776 | 121.290 | 62.157 | 62.345 | 1.00 | 0.00 | N |
| ATOM | 9448 | CA  | PHE | D | 776 | 122.059 | 63.142 | 61.648 | 1.00 | 0.00 | C |
| ATOM | 9449 | C   | PHE | D | 776 | 122.094 | 62.809 | 60.191 | 1.00 | 0.00 | C |
| ATOM | 9450 | O   | PHE | D | 776 | 121.906 | 63.688 | 59.352 | 1.00 | 0.00 | O |
| ATOM | 9451 | CB  | PHE | D | 776 | 123.519 | 63.202 | 62.131 | 1.00 | 0.00 | C |
| ATOM | 9452 | CG  | PHE | D | 776 | 124.282 | 64.058 | 61.177 | 1.00 | 0.00 | C |
| ATOM | 9453 | CD1 | PHE | D | 776 | 124.203 | 65.429 | 61.233 | 1.00 | 0.00 | C |

|      |      |               |         |        |        |      |      |   |
|------|------|---------------|---------|--------|--------|------|------|---|
| ATOM | 9454 | CD2 PHE D 776 | 125.088 | 63.478 | 60.223 | 1.00 | 0.00 | C |
| ATOM | 9455 | CE1 PHE D 776 | 124.912 | 66.207 | 60.349 | 1.00 | 0.00 | C |
| ATOM | 9456 | CE2 PHE D 776 | 125.800 | 64.250 | 59.333 | 1.00 | 0.00 | C |
| ATOM | 9457 | CZ PHE D 776  | 125.711 | 65.619 | 59.396 | 1.00 | 0.00 | C |
| ATOM | 9458 | N VAL D 777   | 122.323 | 61.531 | 59.840 | 1.00 | 0.00 | N |
| ATOM | 9459 | CA VAL D 777  | 122.429 | 61.209 | 58.444 | 1.00 | 0.00 | C |
| ATOM | 9460 | C VAL D 777   | 121.126 | 61.513 | 57.781 | 1.00 | 0.00 | C |
| ATOM | 9461 | O VAL D 777   | 121.088 | 62.037 | 56.668 | 1.00 | 0.00 | O |
| ATOM | 9462 | CB VAL D 777  | 122.789 | 59.777 | 58.162 | 1.00 | 0.00 | C |
| ATOM | 9463 | CG1 VAL D 777 | 121.593 | 58.866 | 58.480 | 1.00 | 0.00 | C |
| ATOM | 9464 | CG2 VAL D 777 | 123.260 | 59.681 | 56.702 | 1.00 | 0.00 | C |
| ATOM | 9465 | N LEU D 778   | 120.003 | 61.205 | 58.454 | 1.00 | 0.00 | N |
| ATOM | 9466 | CA LEU D 778  | 118.714 | 61.440 | 57.875 | 1.00 | 0.00 | C |
| ATOM | 9467 | C LEU D 778   | 118.560 | 62.912 | 57.677 | 1.00 | 0.00 | C |
| ATOM | 9468 | O LEU D 778   | 118.020 | 63.364 | 56.668 | 1.00 | 0.00 | O |
| ATOM | 9469 | CB LEU D 778  | 117.573 | 60.970 | 58.791 | 1.00 | 0.00 | C |
| ATOM | 9470 | CG LEU D 778  | 117.635 | 59.466 | 59.117 | 1.00 | 0.00 | C |
| ATOM | 9471 | CD1 LEU D 778 | 116.456 | 59.031 | 59.997 | 1.00 | 0.00 | C |
| ATOM | 9472 | CD2 LEU D 778 | 117.780 | 58.623 | 57.840 | 1.00 | 0.00 | C |
| ATOM | 9473 | N PHE D 779   | 119.043 | 63.705 | 58.649 | 1.00 | 0.00 | N |
| ATOM | 9474 | CA PHE D 779  | 118.907 | 65.130 | 58.595 | 1.00 | 0.00 | C |
| ATOM | 9475 | C PHE D 779   | 119.615 | 65.660 | 57.391 | 1.00 | 0.00 | C |
| ATOM | 9476 | O PHE D 779   | 119.056 | 66.455 | 56.636 | 1.00 | 0.00 | O |
| ATOM | 9477 | CB PHE D 779  | 119.510 | 65.831 | 59.821 | 1.00 | 0.00 | C |
| ATOM | 9478 | CG PHE D 779  | 119.307 | 67.291 | 59.619 | 1.00 | 0.00 | C |
| ATOM | 9479 | CD1 PHE D 779 | 118.104 | 67.878 | 59.936 | 1.00 | 0.00 | C |
| ATOM | 9480 | CD2 PHE D 779 | 120.323 | 68.069 | 59.116 | 1.00 | 0.00 | C |
| ATOM | 9481 | CE1 PHE D 779 | 117.919 | 69.224 | 59.746 | 1.00 | 0.00 | C |
| ATOM | 9482 | CE2 PHE D 779 | 120.143 | 69.417 | 58.925 | 1.00 | 0.00 | C |
| ATOM | 9483 | CZ PHE D 779  | 118.939 | 69.997 | 59.242 | 1.00 | 0.00 | C |
| ATOM | 9484 | N CYS D 780   | 120.869 | 65.228 | 57.165 | 1.00 | 0.00 | N |
| ATOM | 9485 | CA CYS D 780  | 121.606 | 65.774 | 56.061 | 1.00 | 0.00 | C |
| ATOM | 9486 | C CYS D 780   | 120.935 | 65.397 | 54.776 | 1.00 | 0.00 | C |
| ATOM | 9487 | O CYS D 780   | 120.855 | 66.199 | 53.851 | 1.00 | 0.00 | O |
| ATOM | 9488 | CB CYS D 780  | 123.079 | 65.319 | 56.002 | 1.00 | 0.00 | C |
| ATOM | 9489 | SG CYS D 780  | 123.297 | 63.551 | 55.651 | 1.00 | 0.00 | S |
| ATOM | 9490 | N ASP D 781   | 120.425 | 64.157 | 54.680 | 1.00 | 0.00 | N |
| ATOM | 9491 | CA ASP D 781  | 119.807 | 63.736 | 53.455 | 1.00 | 0.00 | C |
| ATOM | 9492 | C ASP D 781   | 118.605 | 64.581 | 53.192 | 1.00 | 0.00 | C |
| ATOM | 9493 | O ASP D 781   | 118.412 | 65.075 | 52.079 | 1.00 | 0.00 | O |
| ATOM | 9494 | CB ASP D 781  | 119.325 | 62.274 | 53.512 | 1.00 | 0.00 | C |
| ATOM | 9495 | CG ASP D 781  | 118.774 | 61.876 | 52.147 | 1.00 | 0.00 | C |
| ATOM | 9496 | OD1 ASP D 781 | 118.859 | 62.710 | 51.202 | 1.00 | 0.00 | O |
| ATOM | 9497 | OD2 ASP D 781 | 118.256 | 60.735 | 52.031 | 1.00 | 0.00 | O |

|             |     |           |         |        |        |      |      |     |
|-------------|-----|-----------|---------|--------|--------|------|------|-----|
| HETATM 9498 | N   | GUI D 782 | 117.761 | 64.774 | 54.241 | 1.00 | 0.00 | N   |
| HETATM 9499 | CA  | GUI D 782 | 116.534 | 65.524 | 53.993 | 1.00 | 0.00 | C   |
| HETATM 9500 | C   | GUI D 782 | 116.842 | 66.958 | 53.629 | 1.00 | 0.00 | C   |
| HETATM 9501 | O   | GUI D 782 | 116.155 | 67.505 | 52.808 | 1.00 | 0.00 | O   |
| HETATM 9502 | CB  | GUI D 782 | 115.618 | 65.466 | 55.248 | 1.00 | 0.00 | C   |
| HETATM 9503 | CG  | GUI D 782 | 114.967 | 64.077 | 55.549 | 1.00 | 0.00 | C   |
| HETATM 9504 | CD  | GUI D 782 | 114.674 | 63.151 | 54.384 | 1.00 | 0.00 | C   |
| HETATM 9505 | OE1 | GUI D 782 | 115.332 | 62.107 | 54.214 | 1.00 | 0.00 | O   |
| HETATM 9506 | OE2 | GUI D 782 | 113.740 | 63.487 | 53.627 | 1.00 | 0.00 | O1- |
| ATOM 9507   | N   | VAL D 783 | 117.865 | 67.530 | 54.273 | 1.00 | 0.00 | N   |
| ATOM 9508   | CA  | VAL D 783 | 118.173 | 68.892 | 53.952 | 1.00 | 0.00 | C   |
| ATOM 9509   | C   | VAL D 783 | 118.603 | 68.969 | 52.523 | 1.00 | 0.00 | C   |
| ATOM 9510   | O   | VAL D 783 | 118.292 | 69.937 | 51.828 | 1.00 | 0.00 | O   |
| ATOM 9511   | CB  | VAL D 783 | 119.190 | 69.534 | 54.858 | 1.00 | 0.00 | C   |
| ATOM 9512   | CG1 | VAL D 783 | 118.542 | 69.666 | 56.243 | 1.00 | 0.00 | C   |
| ATOM 9513   | CG2 | VAL D 783 | 120.483 | 68.707 | 54.885 | 1.00 | 0.00 | C   |
| ATOM 9514   | N   | ARG D 784 | 119.331 | 67.949 | 52.033 | 1.00 | 0.00 | N   |
| ATOM 9515   | CA  | ARG D 784 | 119.753 | 67.977 | 50.664 | 1.00 | 0.00 | C   |
| ATOM 9516   | C   | ARG D 784 | 118.540 | 67.986 | 49.788 | 1.00 | 0.00 | C   |
| ATOM 9517   | O   | ARG D 784 | 118.475 | 68.730 | 48.811 | 1.00 | 0.00 | O   |
| ATOM 9518   | CB  | ARG D 784 | 120.601 | 66.766 | 50.249 | 1.00 | 0.00 | C   |
| ATOM 9519   | CG  | ARG D 784 | 120.941 | 66.781 | 48.760 | 1.00 | 0.00 | C   |
| ATOM 9520   | CD  | ARG D 784 | 121.810 | 67.970 | 48.348 | 1.00 | 0.00 | C   |
| ATOM 9521   | NE  | ARG D 784 | 121.832 | 68.019 | 46.858 | 1.00 | 0.00 | N   |
| ATOM 9522   | CZ  | ARG D 784 | 122.521 | 69.008 | 46.218 | 1.00 | 0.00 | C   |
| ATOM 9523   | NH1 | ARG D 784 | 123.237 | 69.914 | 46.944 | 1.00 | 0.00 | N   |
| ATOM 9524   | NH2 | ARG D 784 | 122.494 | 69.089 | 44.858 | 1.00 | 0.00 | N   |
| HETATM 9525 | N   | GNI D 785 | 117.537 | 67.161 | 50.134 | 1.00 | 0.00 | N   |
| HETATM 9526 | CA  | GNI D 785 | 116.326 | 67.048 | 49.369 | 1.00 | 0.00 | C   |
| HETATM 9527 | C   | GNI D 785 | 115.637 | 68.372 | 49.419 | 1.00 | 0.00 | C   |
| HETATM 9528 | O   | GNI D 785 | 115.059 | 68.831 | 48.435 | 1.00 | 0.00 | O   |
| HETATM 9529 | CB  | GNI D 785 | 115.371 | 65.995 | 49.964 | 1.00 | 0.00 | C   |
| HETATM 9530 | CG  | GNI D 785 | 114.042 | 65.853 | 49.224 | 1.00 | 0.00 | C   |
| HETATM 9531 | CD  | GNI D 785 | 113.398 | 64.554 | 49.691 | 1.00 | 0.00 | C   |
| HETATM 9532 | NE2 | GNI D 785 | 113.705 | 63.434 | 48.984 | 1.00 | 0.00 | N   |
| HETATM 9533 | OE1 | GNI D 785 | 112.640 | 64.535 | 50.661 | 1.00 | 0.00 | O   |
| ATOM 9534   | N   | TRP D 786 | 115.708 | 69.036 | 50.582 | 1.00 | 0.00 | N   |
| ATOM 9535   | CA  | TRP D 786 | 115.079 | 70.307 | 50.778 | 1.00 | 0.00 | C   |
| ATOM 9536   | C   | TRP D 786 | 115.678 | 71.241 | 49.778 | 1.00 | 0.00 | C   |
| ATOM 9537   | O   | TRP D 786 | 114.980 | 72.023 | 49.137 | 1.00 | 0.00 | O   |
| ATOM 9538   | CB  | TRP D 786 | 115.395 | 70.869 | 52.175 | 1.00 | 0.00 | C   |
| ATOM 9539   | CG  | TRP D 786 | 114.720 | 72.171 | 52.543 | 1.00 | 0.00 | C   |
| ATOM 9540   | CD1 | TRP D 786 | 115.079 | 73.453 | 52.242 | 1.00 | 0.00 | C   |
| ATOM 9541   | CD2 | TRP D 786 | 113.562 | 72.261 | 53.390 | 1.00 | 0.00 | C   |

|      |      |               |         |        |        |      |      |   |
|------|------|---------------|---------|--------|--------|------|------|---|
| ATOM | 9542 | CE2 TRP D 786 | 113.279 | 73.614 | 53.558 | 1.00 | 0.00 | C |
| ATOM | 9543 | CE3 TRP D 786 | 112.810 | 71.295 | 53.993 | 1.00 | 0.00 | C |
| ATOM | 9544 | NE1 TRP D 786 | 114.213 | 74.336 | 52.846 | 1.00 | 0.00 | N |
| ATOM | 9545 | CZ2 TRP D 786 | 112.234 | 74.024 | 54.335 | 1.00 | 0.00 | C |
| ATOM | 9546 | CZ3 TRP D 786 | 111.744 | 71.709 | 54.760 | 1.00 | 0.00 | C |
| ATOM | 9547 | CH2 TRP D 786 | 111.463 | 73.048 | 54.928 | 1.00 | 0.00 | C |
| ATOM | 9548 | N TYR D 787   | 117.012 | 71.168 | 49.619 | 1.00 | 0.00 | N |
| ATOM | 9549 | CA TYR D 787  | 117.719 | 72.037 | 48.729 | 1.00 | 0.00 | C |
| ATOM | 9550 | C TYR D 787   | 117.301 | 71.805 | 47.312 | 1.00 | 0.00 | C |
| ATOM | 9551 | O TYR D 787   | 117.123 | 72.760 | 46.556 | 1.00 | 0.00 | O |
| ATOM | 9552 | CB TYR D 787  | 119.245 | 71.849 | 48.785 | 1.00 | 0.00 | C |
| ATOM | 9553 | CG TYR D 787  | 119.826 | 72.709 | 47.715 | 1.00 | 0.00 | C |
| ATOM | 9554 | CD1 TYR D 787 | 119.943 | 74.069 | 47.891 | 1.00 | 0.00 | C |
| ATOM | 9555 | CD2 TYR D 787 | 120.260 | 72.152 | 46.534 | 1.00 | 0.00 | C |
| ATOM | 9556 | CE1 TYR D 787 | 120.480 | 74.860 | 46.899 | 1.00 | 0.00 | C |
| ATOM | 9557 | CE2 TYR D 787 | 120.798 | 72.938 | 45.539 | 1.00 | 0.00 | C |
| ATOM | 9558 | CZ TYR D 787  | 120.908 | 74.294 | 45.722 | 1.00 | 0.00 | C |
| ATOM | 9559 | OH TYR D 787  | 121.458 | 75.103 | 44.706 | 1.00 | 0.00 | O |
| ATOM | 9560 | N VAL D 788   | 117.121 | 70.536 | 46.904 | 1.00 | 0.00 | N |
| ATOM | 9561 | CA VAL D 788  | 116.884 | 70.277 | 45.514 | 1.00 | 0.00 | C |
| ATOM | 9562 | C VAL D 788   | 115.646 | 70.977 | 45.037 | 1.00 | 0.00 | C |
| ATOM | 9563 | O VAL D 788   | 115.681 | 71.628 | 43.995 | 1.00 | 0.00 | O |
| ATOM | 9564 | CB VAL D 788  | 116.758 | 68.813 | 45.175 | 1.00 | 0.00 | C |
| ATOM | 9565 | CG1 VAL D 788 | 118.055 | 68.107 | 45.603 | 1.00 | 0.00 | C |
| ATOM | 9566 | CG2 VAL D 788 | 115.477 | 68.233 | 45.797 | 1.00 | 0.00 | C |
| ATOM | 9567 | N ASN D 789   | 114.516 | 70.891 | 45.769 | 1.00 | 0.00 | N |
| ATOM | 9568 | CA ASN D 789  | 113.338 | 71.535 | 45.248 | 1.00 | 0.00 | C |
| ATOM | 9569 | C ASN D 789   | 112.919 | 72.609 | 46.196 | 1.00 | 0.00 | C |
| ATOM | 9570 | O ASN D 789   | 112.660 | 72.336 | 47.367 | 1.00 | 0.00 | O |
| ATOM | 9571 | CB ASN D 789  | 112.143 | 70.579 | 45.085 | 1.00 | 0.00 | C |
| ATOM | 9572 | CG ASN D 789  | 112.474 | 69.600 | 43.967 | 1.00 | 0.00 | C |
| ATOM | 9573 | ND2 ASN D 789 | 112.249 | 68.284 | 44.226 | 1.00 | 0.00 | N |
| ATOM | 9574 | OD1 ASN D 789 | 112.927 | 69.995 | 42.895 | 1.00 | 0.00 | O |
| ATOM | 9575 | N GLY D 790   | 112.893 | 73.876 | 45.732 | 1.00 | 0.00 | N |
| ATOM | 9576 | CA GLY D 790  | 112.471 | 74.907 | 46.632 | 1.00 | 0.00 | C |
| ATOM | 9577 | C GLY D 790   | 111.000 | 74.817 | 46.923 | 1.00 | 0.00 | C |
| ATOM | 9578 | O GLY D 790   | 110.607 | 74.657 | 48.076 | 1.00 | 0.00 | O |
| ATOM | 9579 | N VAL D 791   | 110.152 | 74.934 | 45.877 | 1.00 | 0.00 | N |
| ATOM | 9580 | CA VAL D 791  | 108.717 | 74.917 | 46.017 | 1.00 | 0.00 | C |
| ATOM | 9581 | C VAL D 791   | 108.173 | 73.535 | 46.175 | 1.00 | 0.00 | C |
| ATOM | 9582 | O VAL D 791   | 107.332 | 73.274 | 47.034 | 1.00 | 0.00 | O |
| ATOM | 9583 | CB VAL D 791  | 108.011 | 75.517 | 44.836 | 1.00 | 0.00 | C |
| ATOM | 9584 | CG1 VAL D 791 | 106.495 | 75.336 | 45.033 | 1.00 | 0.00 | C |
| ATOM | 9585 | CG2 VAL D 791 | 108.454 | 76.984 | 44.696 | 1.00 | 0.00 | C |



|      |      |     |           |         |        |        |      |      |   |
|------|------|-----|-----------|---------|--------|--------|------|------|---|
| ATOM | 9586 | N   | ASN D 792 | 108.673 | 72.609 | 45.339 | 1.00 | 0.00 | N |
| ATOM | 9587 | CA  | ASN D 792 | 108.127 | 71.291 | 45.240 | 1.00 | 0.00 | C |
| ATOM | 9588 | C   | ASN D 792 | 108.269 | 70.593 | 46.550 | 1.00 | 0.00 | C |
| ATOM | 9589 | O   | ASN D 792 | 107.397 | 69.831 | 46.957 | 1.00 | 0.00 | O |
| ATOM | 9590 | CB  | ASN D 792 | 108.820 | 70.433 | 44.167 | 1.00 | 0.00 | C |
| ATOM | 9591 | CG  | ASN D 792 | 107.923 | 69.239 | 43.876 | 1.00 | 0.00 | C |
| ATOM | 9592 | ND2 | ASN D 792 | 107.610 | 69.025 | 42.570 | 1.00 | 0.00 | N |
| ATOM | 9593 | OD1 | ASN D 792 | 107.499 | 68.523 | 44.782 | 1.00 | 0.00 | O |
| ATOM | 9594 | N   | TYR D 793 | 109.379 | 70.829 | 47.252 | 1.00 | 0.00 | N |
| ATOM | 9595 | CA  | TYR D 793 | 109.579 | 70.152 | 48.497 | 1.00 | 0.00 | C |
| ATOM | 9596 | C   | TYR D 793 | 108.481 | 70.575 | 49.429 | 1.00 | 0.00 | C |
| ATOM | 9597 | O   | TYR D 793 | 107.853 | 69.749 | 50.087 | 1.00 | 0.00 | O |
| ATOM | 9598 | CB  | TYR D 793 | 110.918 | 70.542 | 49.142 | 1.00 | 0.00 | C |
| ATOM | 9599 | CG  | TYR D 793 | 111.160 | 69.679 | 50.333 | 1.00 | 0.00 | C |
| ATOM | 9600 | CD1 | TYR D 793 | 111.723 | 68.434 | 50.181 | 1.00 | 0.00 | C |
| ATOM | 9601 | CD2 | TYR D 793 | 110.832 | 70.110 | 51.598 | 1.00 | 0.00 | C |
| ATOM | 9602 | CE1 | TYR D 793 | 111.958 | 67.626 | 51.269 | 1.00 | 0.00 | C |
| ATOM | 9603 | CE2 | TYR D 793 | 111.066 | 69.308 | 52.691 | 1.00 | 0.00 | C |
| ATOM | 9604 | CZ  | TYR D 793 | 111.630 | 68.064 | 52.529 | 1.00 | 0.00 | C |
| ATOM | 9605 | OH  | TYR D 793 | 111.876 | 67.240 | 53.646 | 1.00 | 0.00 | O |
| ATOM | 9606 | N   | PHE D 794 | 108.195 | 71.884 | 49.480 | 1.00 | 0.00 | N |
| ATOM | 9607 | CA  | PHE D 794 | 107.194 | 72.406 | 50.365 | 1.00 | 0.00 | C |
| ATOM | 9608 | C   | PHE D 794 | 105.838 | 71.928 | 49.968 | 1.00 | 0.00 | C |
| ATOM | 9609 | O   | PHE D 794 | 104.977 | 71.747 | 50.826 | 1.00 | 0.00 | O |
| ATOM | 9610 | CB  | PHE D 794 | 107.109 | 73.942 | 50.394 | 1.00 | 0.00 | C |
| ATOM | 9611 | CG  | PHE D 794 | 108.299 | 74.466 | 51.113 | 1.00 | 0.00 | C |
| ATOM | 9612 | CD1 | PHE D 794 | 108.404 | 74.330 | 52.478 | 1.00 | 0.00 | C |
| ATOM | 9613 | CD2 | PHE D 794 | 109.293 | 75.117 | 50.428 | 1.00 | 0.00 | C |
| ATOM | 9614 | CE1 | PHE D 794 | 109.502 | 74.822 | 53.142 | 1.00 | 0.00 | C |
| ATOM | 9615 | CE2 | PHE D 794 | 110.392 | 75.616 | 51.084 | 1.00 | 0.00 | C |
| ATOM | 9616 | CZ  | PHE D 794 | 110.498 | 75.463 | 52.446 | 1.00 | 0.00 | C |
| ATOM | 9617 | N   | THR D 795 | 105.594 | 71.731 | 48.661 | 1.00 | 0.00 | N |
| ATOM | 9618 | CA  | THR D 795 | 104.259 | 71.425 | 48.245 | 1.00 | 0.00 | C |
| ATOM | 9619 | C   | THR D 795 | 103.749 | 70.191 | 48.933 | 1.00 | 0.00 | C |
| ATOM | 9620 | O   | THR D 795 | 102.639 | 70.201 | 49.460 | 1.00 | 0.00 | O |
| ATOM | 9621 | CB  | THR D 795 | 104.114 | 71.253 | 46.758 | 1.00 | 0.00 | C |
| ATOM | 9622 | CG2 | THR D 795 | 104.755 | 69.943 | 46.289 | 1.00 | 0.00 | C |
| ATOM | 9623 | OG1 | THR D 795 | 102.743 | 71.232 | 46.425 | 1.00 | 0.00 | O |
| ATOM | 9624 | N   | ASP D 796 | 104.534 | 69.096 | 48.971 | 1.00 | 0.00 | N |
| ATOM | 9625 | CA  | ASP D 796 | 104.065 | 67.906 | 49.627 | 1.00 | 0.00 | C |
| ATOM | 9626 | C   | ASP D 796 | 104.093 | 68.178 | 51.097 | 1.00 | 0.00 | C |
| ATOM | 9627 | O   | ASP D 796 | 104.999 | 68.840 | 51.605 | 1.00 | 0.00 | O |
| ATOM | 9628 | CB  | ASP D 796 | 104.963 | 66.685 | 49.331 | 1.00 | 0.00 | C |
| ATOM | 9629 | CG  | ASP D 796 | 104.267 | 65.389 | 49.743 | 1.00 | 0.00 | C |

|        |      |               |         |        |        |      |      |   |
|--------|------|---------------|---------|--------|--------|------|------|---|
| ATOM   | 9630 | OD1 ASP D 796 | 103.574 | 65.376 | 50.793 | 1.00 | 0.00 | O |
| ATOM   | 9631 | OD2 ASP D 796 | 104.425 | 64.385 | 48.996 | 1.00 | 0.00 | O |
| ATOM   | 9632 | N LEU D 797   | 103.054 | 67.724 | 51.815 | 1.00 | 0.00 | N |
| ATOM   | 9633 | CA LEU D 797  | 102.970 | 67.887 | 53.237 | 1.00 | 0.00 | C |
| ATOM   | 9634 | C LEU D 797   | 103.940 | 66.980 | 53.929 | 1.00 | 0.00 | C |
| ATOM   | 9635 | O LEU D 797   | 104.582 | 67.363 | 54.904 | 1.00 | 0.00 | O |
| ATOM   | 9636 | CB LEU D 797  | 101.566 | 67.540 | 53.761 | 1.00 | 0.00 | C |
| ATOM   | 9637 | CG LEU D 797  | 100.466 | 68.456 | 53.194 | 1.00 | 0.00 | C |
| ATOM   | 9638 | CD1 LEU D 797 | 99.082  | 68.081 | 53.739 | 1.00 | 0.00 | C |
| ATOM   | 9639 | CD2 LEU D 797 | 100.810 | 69.937 | 53.416 | 1.00 | 0.00 | C |
| ATOM   | 9640 | N TRP D 798   | 104.072 | 65.739 | 53.439 | 1.00 | 0.00 | N |
| ATOM   | 9641 | CA TRP D 798  | 104.850 | 64.751 | 54.130 | 1.00 | 0.00 | C |
| ATOM   | 9642 | C TRP D 798   | 106.290 | 65.123 | 54.189 | 1.00 | 0.00 | C |
| ATOM   | 9643 | O TRP D 798   | 106.918 | 64.994 | 55.240 | 1.00 | 0.00 | O |
| ATOM   | 9644 | CB TRP D 798  | 104.704 | 63.356 | 53.500 | 1.00 | 0.00 | C |
| ATOM   | 9645 | CG TRP D 798  | 103.295 | 62.831 | 53.644 | 1.00 | 0.00 | C |
| ATOM   | 9646 | CD1 TRP D 798 | 102.276 | 62.807 | 52.736 | 1.00 | 0.00 | C |
| ATOM   | 9647 | CD2 TRP D 798 | 102.768 | 62.281 | 54.860 | 1.00 | 0.00 | C |
| ATOM   | 9648 | CE2 TRP D 798 | 101.435 | 61.949 | 54.621 | 1.00 | 0.00 | C |
| ATOM   | 9649 | CE3 TRP D 798 | 103.348 | 62.073 | 56.080 | 1.00 | 0.00 | C |
| ATOM   | 9650 | NE1 TRP D 798 | 101.145 | 62.276 | 53.313 | 1.00 | 0.00 | N |
| ATOM   | 9651 | CZ2 TRP D 798 | 100.656 | 61.404 | 55.604 | 1.00 | 0.00 | C |
| ATOM   | 9652 | CZ3 TRP D 798 | 102.562 | 61.518 | 57.066 | 1.00 | 0.00 | C |
| ATOM   | 9653 | CH2 TRP D 798 | 101.241 | 61.190 | 56.831 | 1.00 | 0.00 | C |
| HETATM | 9654 | N ANI D 799   | 106.864 | 65.610 | 53.040 | 1.00 | 0.00 | N |
| HETATM | 9655 | CA ANI D 799  | 108.296 | 65.847 | 53.202 | 1.00 | 0.00 | C |
| HETATM | 9656 | C ANI D 799   | 108.550 | 67.009 | 54.133 | 1.00 | 0.00 | C |
| HETATM | 9657 | O ANI D 799   | 109.580 | 66.980 | 54.795 | 1.00 | 0.00 | O |
| HETATM | 9658 | CB ANI D 799  | 108.941 | 66.104 | 51.811 | 1.00 | 0.00 | C |
| HETATM | 9659 | CG ANI D 799  | 109.161 | 64.884 | 50.910 | 1.00 | 0.00 | C |
| HETATM | 9660 | ND2 ANI D 799 | 108.252 | 64.585 | 50.021 | 1.00 | 0.00 | N |
| HETATM | 9661 | OD1 ANI D 799 | 110.166 | 64.195 | 50.982 | 1.00 | 0.00 | O |
| ATOM   | 9662 | N VAL D 800   | 107.630 | 67.975 | 54.293 | 1.00 | 0.00 | N |
| ATOM   | 9663 | CA VAL D 800  | 107.867 | 68.964 | 55.308 | 1.00 | 0.00 | C |
| ATOM   | 9664 | C VAL D 800   | 107.688 | 68.329 | 56.658 | 1.00 | 0.00 | C |
| ATOM   | 9665 | O VAL D 800   | 108.370 | 68.681 | 57.618 | 1.00 | 0.00 | O |
| ATOM   | 9666 | CB VAL D 800  | 107.008 | 70.199 | 55.217 | 1.00 | 0.00 | C |
| ATOM   | 9667 | CG1 VAL D 800 | 107.269 | 70.869 | 53.858 | 1.00 | 0.00 | C |
| ATOM   | 9668 | CG2 VAL D 800 | 105.538 | 69.852 | 55.489 | 1.00 | 0.00 | C |
| ATOM   | 9669 | N MET D 801   | 106.756 | 67.361 | 56.770 | 1.00 | 0.00 | N |
| ATOM   | 9670 | CA MET D 801  | 106.471 | 66.732 | 58.029 | 1.00 | 0.00 | C |
| ATOM   | 9671 | C MET D 801   | 107.692 | 66.035 | 58.538 | 1.00 | 0.00 | C |
| ATOM   | 9672 | O MET D 801   | 107.978 | 66.075 | 59.734 | 1.00 | 0.00 | O |
| ATOM   | 9673 | CB MET D 801  | 105.354 | 65.677 | 57.945 | 1.00 | 0.00 | C |

|                           |         |        |        |      |      |     |
|---------------------------|---------|--------|--------|------|------|-----|
| ATOM 9674 CG MET D 801    | 105.199 | 64.866 | 59.236 | 1.00 | 0.00 | C   |
| ATOM 9675 SD MET D 801    | 104.571 | 65.795 | 60.664 | 1.00 | 0.00 | S   |
| ATOM 9676 CE MET D 801    | 102.846 | 65.778 | 60.105 | 1.00 | 0.00 | C   |
| HETATM 9677 N AP1 D 802   | 108.444 | 65.373 | 57.647 | 1.00 | 0.00 | N   |
| HETATM 9678 CA AP1 D 802  | 109.599 | 64.637 | 58.071 | 1.00 | 0.00 | C   |
| HETATM 9679 C AP1 D 802   | 110.595 | 65.582 | 58.674 | 1.00 | 0.00 | C   |
| HETATM 9680 O AP1 D 802   | 111.212 | 65.276 | 59.694 | 1.00 | 0.00 | O   |
| HETATM 9681 CB AP1 D 802  | 110.292 | 63.909 | 56.910 | 1.00 | 0.00 | C   |
| HETATM 9682 CG AP1 D 802  | 109.277 | 63.669 | 55.800 | 1.00 | 0.00 | C   |
| HETATM 9683 OD1 AP1 D 802 | 108.107 | 63.323 | 56.117 | 1.00 | 0.00 | O1- |
| HETATM 9684 OD2 AP1 D 802 | 109.661 | 63.824 | 54.612 | 1.00 | 0.00 | O   |
| ATOM 9685 N THR D 803     | 110.784 | 66.764 | 58.058 | 1.00 | 0.00 | N   |
| ATOM 9686 CA THR D 803    | 111.745 | 67.699 | 58.570 | 1.00 | 0.00 | C   |
| ATOM 9687 C THR D 803     | 111.297 | 68.163 | 59.918 | 1.00 | 0.00 | C   |
| ATOM 9688 O THR D 803     | 112.101 | 68.307 | 60.834 | 1.00 | 0.00 | O   |
| ATOM 9689 CB THR D 803    | 111.930 | 68.919 | 57.707 | 1.00 | 0.00 | C   |
| ATOM 9690 CG2 THR D 803   | 112.311 | 68.472 | 56.288 | 1.00 | 0.00 | C   |
| ATOM 9691 OG1 THR D 803   | 110.738 | 69.690 | 57.674 | 1.00 | 0.00 | O   |
| ATOM 9692 N LEU D 804     | 109.984 | 68.407 | 60.070 | 1.00 | 0.00 | N   |
| ATOM 9693 CA LEU D 804    | 109.473 | 68.915 | 61.311 | 1.00 | 0.00 | C   |
| ATOM 9694 C LEU D 804     | 109.748 | 67.890 | 62.367 | 1.00 | 0.00 | C   |
| ATOM 9695 O LEU D 804     | 110.189 | 68.228 | 63.464 | 1.00 | 0.00 | O   |
| ATOM 9696 CB LEU D 804    | 107.951 | 69.166 | 61.244 | 1.00 | 0.00 | C   |
| ATOM 9697 CG LEU D 804    | 107.294 | 69.896 | 62.442 | 1.00 | 0.00 | C   |
| ATOM 9698 CD1 LEU D 804   | 105.783 | 70.059 | 62.201 | 1.00 | 0.00 | C   |
| ATOM 9699 CD2 LEU D 804   | 107.574 | 69.237 | 63.803 | 1.00 | 0.00 | C   |
| ATOM 9700 N GLY D 805     | 109.502 | 66.604 | 62.059 | 1.00 | 0.00 | N   |
| ATOM 9701 CA GLY D 805    | 109.681 | 65.574 | 63.039 | 1.00 | 0.00 | C   |
| ATOM 9702 C GLY D 805     | 111.121 | 65.490 | 63.436 | 1.00 | 0.00 | C   |
| ATOM 9703 O GLY D 805     | 111.441 | 65.330 | 64.614 | 1.00 | 0.00 | O   |
| ATOM 9704 N LEU D 806     | 112.033 | 65.583 | 62.452 | 1.00 | 0.00 | N   |
| ATOM 9705 CA LEU D 806    | 113.440 | 65.459 | 62.712 | 1.00 | 0.00 | C   |
| ATOM 9706 C LEU D 806     | 113.866 | 66.602 | 63.572 | 1.00 | 0.00 | C   |
| ATOM 9707 O LEU D 806     | 114.664 | 66.436 | 64.491 | 1.00 | 0.00 | O   |
| ATOM 9708 CB LEU D 806    | 114.276 | 65.505 | 61.415 | 1.00 | 0.00 | C   |
| ATOM 9709 CG LEU D 806    | 115.778 | 65.183 | 61.572 | 1.00 | 0.00 | C   |
| ATOM 9710 CD1 LEU D 806   | 116.537 | 66.235 | 62.397 | 1.00 | 0.00 | C   |
| ATOM 9711 CD2 LEU D 806   | 115.978 | 63.749 | 62.089 | 1.00 | 0.00 | C   |
| ATOM 9712 N PHE D 807     | 113.333 | 67.801 | 63.286 | 1.00 | 0.00 | N   |
| ATOM 9713 CA PHE D 807    | 113.708 | 68.983 | 64.008 | 1.00 | 0.00 | C   |
| ATOM 9714 C PHE D 807     | 113.288 | 68.832 | 65.438 | 1.00 | 0.00 | C   |
| ATOM 9715 O PHE D 807     | 114.048 | 69.148 | 66.352 | 1.00 | 0.00 | O   |
| ATOM 9716 CB PHE D 807    | 113.031 | 70.249 | 63.461 | 1.00 | 0.00 | C   |
| ATOM 9717 CG PHE D 807    | 113.499 | 71.398 | 64.285 | 1.00 | 0.00 | C   |

|      |      |               |         |        |        |      |      |   |
|------|------|---------------|---------|--------|--------|------|------|---|
| ATOM | 9718 | CD1 PHE D 807 | 114.726 | 71.971 | 64.045 | 1.00 | 0.00 | C |
| ATOM | 9719 | CD2 PHE D 807 | 112.710 | 71.902 | 65.293 | 1.00 | 0.00 | C |
| ATOM | 9720 | CE1 PHE D 807 | 115.161 | 73.032 | 64.805 | 1.00 | 0.00 | C |
| ATOM | 9721 | CE2 PHE D 807 | 113.140 | 72.963 | 66.054 | 1.00 | 0.00 | C |
| ATOM | 9722 | CZ PHE D 807  | 114.367 | 73.527 | 65.811 | 1.00 | 0.00 | C |
| ATOM | 9723 | N TYR D 808   | 112.061 | 68.330 | 65.661 | 1.00 | 0.00 | N |
| ATOM | 9724 | CA TYR D 808  | 111.526 | 68.198 | 66.985 | 1.00 | 0.00 | C |
| ATOM | 9725 | C TYR D 808   | 112.379 | 67.227 | 67.739 | 1.00 | 0.00 | C |
| ATOM | 9726 | O TYR D 808   | 112.653 | 67.411 | 68.923 | 1.00 | 0.00 | O |
| ATOM | 9727 | CB TYR D 808  | 110.069 | 67.699 | 66.979 | 1.00 | 0.00 | C |
| ATOM | 9728 | CG TYR D 808  | 109.552 | 67.737 | 68.379 | 1.00 | 0.00 | C |
| ATOM | 9729 | CD1 TYR D 808 | 109.324 | 68.942 | 69.001 | 1.00 | 0.00 | C |
| ATOM | 9730 | CD2 TYR D 808 | 109.265 | 66.574 | 69.055 | 1.00 | 0.00 | C |
| ATOM | 9731 | CE1 TYR D 808 | 108.843 | 68.991 | 70.288 | 1.00 | 0.00 | C |
| ATOM | 9732 | CE2 TYR D 808 | 108.783 | 66.616 | 70.342 | 1.00 | 0.00 | C |
| ATOM | 9733 | CZ TYR D 808  | 108.572 | 67.825 | 70.961 | 1.00 | 0.00 | C |
| ATOM | 9734 | OH TYR D 808  | 108.078 | 67.865 | 72.281 | 1.00 | 0.00 | O |
| ATOM | 9735 | N PHE D 809   | 112.821 | 66.156 | 67.057 | 1.00 | 0.00 | N |
| ATOM | 9736 | CA PHE D 809  | 113.644 | 65.146 | 67.658 | 1.00 | 0.00 | C |
| ATOM | 9737 | C PHE D 809   | 114.932 | 65.783 | 68.071 | 1.00 | 0.00 | C |
| ATOM | 9738 | O PHE D 809   | 115.462 | 65.502 | 69.147 | 1.00 | 0.00 | O |
| ATOM | 9739 | CB PHE D 809  | 113.965 | 64.017 | 66.664 | 1.00 | 0.00 | C |
| ATOM | 9740 | CG PHE D 809  | 114.771 | 62.978 | 67.360 | 1.00 | 0.00 | C |
| ATOM | 9741 | CD1 PHE D 809 | 114.151 | 62.029 | 68.133 | 1.00 | 0.00 | C |
| ATOM | 9742 | CD2 PHE D 809 | 116.138 | 62.944 | 67.229 | 1.00 | 0.00 | C |
| ATOM | 9743 | CE1 PHE D 809 | 114.887 | 61.062 | 68.773 | 1.00 | 0.00 | C |
| ATOM | 9744 | CE2 PHE D 809 | 116.880 | 61.978 | 67.868 | 1.00 | 0.00 | C |
| ATOM | 9745 | CZ PHE D 809  | 116.255 | 61.034 | 68.645 | 1.00 | 0.00 | C |
| ATOM | 9746 | N ILE D 810   | 115.466 | 66.678 | 67.221 | 1.00 | 0.00 | N |
| ATOM | 9747 | CA ILE D 810  | 116.709 | 67.337 | 67.498 | 1.00 | 0.00 | C |
| ATOM | 9748 | C ILE D 810   | 116.520 | 68.108 | 68.761 | 1.00 | 0.00 | C |
| ATOM | 9749 | O ILE D 810   | 117.377 | 68.101 | 69.642 | 1.00 | 0.00 | O |
| ATOM | 9750 | CB ILE D 810  | 117.066 | 68.354 | 66.448 | 1.00 | 0.00 | C |
| ATOM | 9751 | CG1 ILE D 810 | 117.178 | 67.720 | 65.053 | 1.00 | 0.00 | C |
| ATOM | 9752 | CG2 ILE D 810 | 118.348 | 69.063 | 66.916 | 1.00 | 0.00 | C |
| ATOM | 9753 | CD1 ILE D 810 | 118.312 | 66.710 | 64.905 | 1.00 | 0.00 | C |
| ATOM | 9754 | N ALA D 811   | 115.371 | 68.797 | 68.877 | 1.00 | 0.00 | N |
| ATOM | 9755 | CA ALA D 811  | 115.102 | 69.608 | 70.027 | 1.00 | 0.00 | C |
| ATOM | 9756 | C ALA D 811   | 115.083 | 68.720 | 71.227 | 1.00 | 0.00 | C |
| ATOM | 9757 | O ALA D 811   | 115.633 | 69.060 | 72.274 | 1.00 | 0.00 | O |
| ATOM | 9758 | CB ALA D 811  | 113.737 | 70.309 | 69.951 | 1.00 | 0.00 | C |
| ATOM | 9759 | N GLY D 812   | 114.470 | 67.533 | 71.107 | 1.00 | 0.00 | N |
| ATOM | 9760 | CA GLY D 812  | 114.375 | 66.661 | 72.238 | 1.00 | 0.00 | C |
| ATOM | 9761 | C GLY D 812   | 115.755 | 66.297 | 72.675 | 1.00 | 0.00 | C |

|      |      |     |           |         |        |        |      |      |   |
|------|------|-----|-----------|---------|--------|--------|------|------|---|
| ATOM | 9762 | O   | GLY D 812 | 116.023 | 66.189 | 73.871 | 1.00 | 0.00 | O |
| ATOM | 9763 | N   | ILE D 813 | 116.664 | 66.077 | 71.710 | 1.00 | 0.00 | N |
| ATOM | 9764 | CA  | ILE D 813 | 118.002 | 65.680 | 72.032 | 1.00 | 0.00 | C |
| ATOM | 9765 | C   | ILE D 813 | 118.672 | 66.774 | 72.800 | 1.00 | 0.00 | C |
| ATOM | 9766 | O   | ILE D 813 | 119.333 | 66.517 | 73.805 | 1.00 | 0.00 | O |
| ATOM | 9767 | CB  | ILE D 813 | 118.832 | 65.389 | 70.819 | 1.00 | 0.00 | C |
| ATOM | 9768 | CG1 | ILE D 813 | 118.216 | 64.228 | 70.018 | 1.00 | 0.00 | C |
| ATOM | 9769 | CG2 | ILE D 813 | 120.276 | 65.119 | 71.279 | 1.00 | 0.00 | C |
| ATOM | 9770 | CD1 | ILE D 813 | 118.830 | 64.050 | 68.631 | 1.00 | 0.00 | C |
| ATOM | 9771 | N   | VAL D 814 | 118.518 | 68.034 | 72.351 | 1.00 | 0.00 | N |
| ATOM | 9772 | CA  | VAL D 814 | 119.185 | 69.126 | 73.004 | 1.00 | 0.00 | C |
| ATOM | 9773 | C   | VAL D 814 | 118.649 | 69.285 | 74.396 | 1.00 | 0.00 | C |
| ATOM | 9774 | O   | VAL D 814 | 119.401 | 69.532 | 75.337 | 1.00 | 0.00 | O |
| ATOM | 9775 | CB  | VAL D 814 | 119.042 | 70.432 | 72.275 | 1.00 | 0.00 | C |
| ATOM | 9776 | CG1 | VAL D 814 | 117.605 | 70.956 | 72.411 | 1.00 | 0.00 | C |
| ATOM | 9777 | CG2 | VAL D 814 | 120.105 | 71.397 | 72.816 | 1.00 | 0.00 | C |
| ATOM | 9778 | N   | PHE D 815 | 117.323 | 69.132 | 74.552 | 1.00 | 0.00 | N |
| ATOM | 9779 | CA  | PHE D 815 | 116.617 | 69.282 | 75.796 | 1.00 | 0.00 | C |
| ATOM | 9780 | C   | PHE D 815 | 116.970 | 68.196 | 76.763 | 1.00 | 0.00 | C |
| ATOM | 9781 | O   | PHE D 815 | 116.892 | 68.408 | 77.971 | 1.00 | 0.00 | O |
| ATOM | 9782 | CB  | PHE D 815 | 115.082 | 69.284 | 75.653 | 1.00 | 0.00 | C |
| ATOM | 9783 | CG  | PHE D 815 | 114.653 | 70.628 | 75.177 | 1.00 | 0.00 | C |
| ATOM | 9784 | CD1 | PHE D 815 | 114.573 | 71.678 | 76.066 | 1.00 | 0.00 | C |
| ATOM | 9785 | CD2 | PHE D 815 | 114.305 | 70.849 | 73.865 | 1.00 | 0.00 | C |
| ATOM | 9786 | CE1 | PHE D 815 | 114.173 | 72.925 | 75.646 | 1.00 | 0.00 | C |
| ATOM | 9787 | CE2 | PHE D 815 | 113.905 | 72.092 | 73.436 | 1.00 | 0.00 | C |
| ATOM | 9788 | CZ  | PHE D 815 | 113.840 | 73.134 | 74.330 | 1.00 | 0.00 | C |
| ATOM | 9789 | N   | ARG D 816 | 117.331 | 66.994 | 76.284 | 1.00 | 0.00 | N |
| ATOM | 9790 | CA  | ARG D 816 | 117.534 | 65.920 | 77.218 | 1.00 | 0.00 | C |
| ATOM | 9791 | C   | ARG D 816 | 118.593 | 66.270 | 78.219 | 1.00 | 0.00 | C |
| ATOM | 9792 | O   | ARG D 816 | 118.423 | 66.019 | 79.408 | 1.00 | 0.00 | O |
| ATOM | 9793 | CB  | ARG D 816 | 117.966 | 64.586 | 76.588 | 1.00 | 0.00 | C |
| ATOM | 9794 | CG  | ARG D 816 | 118.124 | 63.503 | 77.661 | 1.00 | 0.00 | C |
| ATOM | 9795 | CD  | ARG D 816 | 118.704 | 62.178 | 77.163 | 1.00 | 0.00 | C |
| ATOM | 9796 | NE  | ARG D 816 | 117.737 | 61.597 | 76.193 | 1.00 | 0.00 | N |
| ATOM | 9797 | CZ  | ARG D 816 | 117.712 | 60.245 | 76.007 | 1.00 | 0.00 | C |
| ATOM | 9798 | NH1 | ARG D 816 | 118.514 | 59.442 | 76.764 | 1.00 | 0.00 | N |
| ATOM | 9799 | NH2 | ARG D 816 | 116.889 | 59.698 | 75.066 | 1.00 | 0.00 | N |
| ATOM | 9800 | N   | LEU D 817 | 119.710 | 66.867 | 77.765 | 1.00 | 0.00 | N |
| ATOM | 9801 | CA  | LEU D 817 | 120.821 | 67.196 | 78.618 | 1.00 | 0.00 | C |
| ATOM | 9802 | C   | LEU D 817 | 120.385 | 68.237 | 79.610 | 1.00 | 0.00 | C |
| ATOM | 9803 | O   | LEU D 817 | 120.810 | 68.215 | 80.766 | 1.00 | 0.00 | O |
| ATOM | 9804 | CB  | LEU D 817 | 122.022 | 67.729 | 77.800 | 1.00 | 0.00 | C |
| ATOM | 9805 | CG  | LEU D 817 | 123.359 | 67.946 | 78.550 | 1.00 | 0.00 | C |

|        |      |               |         |        |        |      |      |     |
|--------|------|---------------|---------|--------|--------|------|------|-----|
| ATOM   | 9806 | CD1 LEU D 817 | 124.446 | 68.413 | 77.568 | 1.00 | 0.00 | C   |
| ATOM   | 9807 | CD2 LEU D 817 | 123.247 | 68.915 | 79.737 | 1.00 | 0.00 | C   |
| HETATM | 9808 | N HIE D 818   | 119.487 | 69.150 | 79.197 | 1.00 | 0.00 | N   |
| HETATM | 9809 | CA HIE D 818  | 119.125 | 70.294 | 79.993 | 1.00 | 0.00 | C   |
| HETATM | 9810 | C HIE D 818   | 118.626 | 69.890 | 81.350 | 1.00 | 0.00 | C   |
| HETATM | 9811 | O HIE D 818   | 119.061 | 70.459 | 82.354 | 1.00 | 0.00 | O   |
| HETATM | 9812 | CB HIE D 818  | 118.032 | 71.152 | 79.339 | 1.00 | 0.00 | C   |
| HETATM | 9813 | CG HIE D 818  | 117.784 | 72.425 | 80.088 | 1.00 | 0.00 | C   |
| HETATM | 9814 | CD2 HIE D 818 | 116.873 | 72.707 | 81.058 | 1.00 | 0.00 | C   |
| HETATM | 9815 | ND1 HIE D 818 | 118.508 | 73.584 | 79.904 | 1.00 | 0.00 | N   |
| HETATM | 9816 | CE1 HIE D 818 | 118.002 | 74.501 | 80.765 | 1.00 | 0.00 | C   |
| HETATM | 9817 | NE2 HIE D 818 | 117.010 | 74.016 | 81.488 | 1.00 | 0.00 | N   |
| ATOM   | 9818 | N SER D 819   | 117.750 | 68.869 | 81.437 | 1.00 | 0.00 | N   |
| ATOM   | 9819 | CA SER D 819  | 117.224 | 68.435 | 82.702 | 1.00 | 0.00 | C   |
| ATOM   | 9820 | C SER D 819   | 116.670 | 69.576 | 83.507 | 1.00 | 0.00 | C   |
| ATOM   | 9821 | O SER D 819   | 117.378 | 70.184 | 84.308 | 1.00 | 0.00 | O   |
| ATOM   | 9822 | CB SER D 819  | 118.277 | 67.710 | 83.553 | 1.00 | 0.00 | C   |
| ATOM   | 9823 | OG SER D 819  | 117.712 | 67.302 | 84.788 | 1.00 | 0.00 | O   |
| ATOM   | 9824 | N SER D 820   | 115.385 | 69.927 | 83.274 | 1.00 | 0.00 | N   |
| ATOM   | 9825 | CA SER D 820  | 114.775 | 70.988 | 84.029 | 1.00 | 0.00 | C   |
| ATOM   | 9826 | C SER D 820   | 113.318 | 70.673 | 84.203 | 1.00 | 0.00 | C   |
| ATOM   | 9827 | O SER D 820   | 112.829 | 69.647 | 83.738 | 1.00 | 0.00 | O   |
| ATOM   | 9828 | CB SER D 820  | 114.888 | 72.354 | 83.328 | 1.00 | 0.00 | C   |
| ATOM   | 9829 | OG SER D 820  | 114.320 | 73.382 | 84.128 | 1.00 | 0.00 | O   |
| ATOM   | 9830 | N ASN D 821   | 112.588 | 71.538 | 84.941 | 1.00 | 0.00 | N   |
| ATOM   | 9831 | CA ASN D 821  | 111.180 | 71.337 | 85.109 | 1.00 | 0.00 | C   |
| ATOM   | 9832 | C ASN D 821   | 110.495 | 71.858 | 83.891 | 1.00 | 0.00 | C   |
| ATOM   | 9833 | O ASN D 821   | 111.021 | 72.715 | 83.182 | 1.00 | 0.00 | O   |
| ATOM   | 9834 | CB ASN D 821  | 110.577 | 72.040 | 86.334 | 1.00 | 0.00 | C   |
| ATOM   | 9835 | CG ASN D 821  | 110.931 | 71.208 | 87.555 | 1.00 | 0.00 | C   |
| ATOM   | 9836 | ND2 ASN D 821 | 111.421 | 71.880 | 88.632 | 1.00 | 0.00 | N   |
| ATOM   | 9837 | OD1 ASN D 821 | 110.773 | 69.989 | 87.554 | 1.00 | 0.00 | O   |
| ATOM   | 9838 | N LYS D 822   | 109.302 | 71.306 | 83.608 | 1.00 | 0.00 | N   |
| ATOM   | 9839 | CA LYS D 822  | 108.500 | 71.667 | 82.471 | 1.00 | 0.00 | C   |
| ATOM   | 9840 | C LYS D 822   | 109.170 | 71.145 | 81.238 | 1.00 | 0.00 | C   |
| ATOM   | 9841 | O LYS D 822   | 108.657 | 71.275 | 80.128 | 1.00 | 0.00 | O   |
| ATOM   | 9842 | CB LYS D 822  | 108.320 | 73.189 | 82.348 | 1.00 | 0.00 | C   |
| ATOM   | 9843 | CG LYS D 822  | 107.568 | 73.780 | 83.542 | 1.00 | 0.00 | C   |
| ATOM   | 9844 | CD LYS D 822  | 107.668 | 75.300 | 83.662 | 1.00 | 0.00 | C   |
| ATOM   | 9845 | CE LYS D 822  | 107.075 | 75.842 | 84.966 | 1.00 | 0.00 | C   |
| ATOM   | 9846 | NZ LYS D 822  | 107.927 | 75.445 | 86.109 | 1.00 | 0.00 | N1+ |
| ATOM   | 9847 | N SER D 823   | 110.342 | 70.509 | 81.426 | 1.00 | 0.00 | N   |
| ATOM   | 9848 | CA SER D 823  | 111.068 | 69.839 | 80.391 | 1.00 | 0.00 | C   |
| ATOM   | 9849 | C SER D 823   | 112.139 | 69.115 | 81.135 | 1.00 | 0.00 | C   |

|      |      |     |           |         |        |        |      |      |   |
|------|------|-----|-----------|---------|--------|--------|------|------|---|
| ATOM | 9850 | O   | SER D 823 | 113.263 | 69.602 | 81.242 | 1.00 | 0.00 | O |
| ATOM | 9851 | CB  | SER D 823 | 111.757 | 70.797 | 79.406 | 1.00 | 0.00 | C |
| ATOM | 9852 | OG  | SER D 823 | 112.457 | 70.057 | 78.417 | 1.00 | 0.00 | O |
| ATOM | 9853 | N   | SER D 824 | 111.801 | 67.927 | 81.670 | 1.00 | 0.00 | N |
| ATOM | 9854 | CA  | SER D 824 | 112.713 | 67.170 | 82.476 | 1.00 | 0.00 | C |
| ATOM | 9855 | C   | SER D 824 | 113.187 | 66.014 | 81.680 | 1.00 | 0.00 | C |
| ATOM | 9856 | O   | SER D 824 | 113.011 | 65.952 | 80.464 | 1.00 | 0.00 | O |
| ATOM | 9857 | CB  | SER D 824 | 112.068 | 66.553 | 83.730 | 1.00 | 0.00 | C |
| ATOM | 9858 | OG  | SER D 824 | 111.581 | 67.563 | 84.600 | 1.00 | 0.00 | O |
| ATOM | 9859 | N   | LEU D 825 | 113.820 | 65.054 | 82.376 | 1.00 | 0.00 | N |
| ATOM | 9860 | CA  | LEU D 825 | 114.215 | 63.873 | 81.687 | 1.00 | 0.00 | C |
| ATOM | 9861 | C   | LEU D 825 | 112.948 | 63.262 | 81.207 | 1.00 | 0.00 | C |
| ATOM | 9862 | O   | LEU D 825 | 112.892 | 62.685 | 80.124 | 1.00 | 0.00 | O |
| ATOM | 9863 | CB  | LEU D 825 | 114.945 | 62.819 | 82.530 | 1.00 | 0.00 | C |
| ATOM | 9864 | CG  | LEU D 825 | 115.128 | 61.519 | 81.726 | 1.00 | 0.00 | C |
| ATOM | 9865 | CD1 | LEU D 825 | 115.832 | 61.783 | 80.391 | 1.00 | 0.00 | C |
| ATOM | 9866 | CD2 | LEU D 825 | 115.827 | 60.428 | 82.540 | 1.00 | 0.00 | C |
| ATOM | 9867 | N   | TYR D 826 | 111.888 | 63.384 | 82.022 | 1.00 | 0.00 | N |
| ATOM | 9868 | CA  | TYR D 826 | 110.629 | 62.834 | 81.634 | 1.00 | 0.00 | C |
| ATOM | 9869 | C   | TYR D 826 | 110.203 | 63.550 | 80.392 | 1.00 | 0.00 | C |
| ATOM | 9870 | O   | TYR D 826 | 109.721 | 62.930 | 79.446 | 1.00 | 0.00 | O |
| ATOM | 9871 | CB  | TYR D 826 | 109.532 | 63.025 | 82.689 | 1.00 | 0.00 | C |
| ATOM | 9872 | CG  | TYR D 826 | 108.337 | 62.294 | 82.182 | 1.00 | 0.00 | C |
| ATOM | 9873 | CD1 | TYR D 826 | 108.237 | 60.934 | 82.361 | 1.00 | 0.00 | C |
| ATOM | 9874 | CD2 | TYR D 826 | 107.325 | 62.960 | 81.530 | 1.00 | 0.00 | C |
| ATOM | 9875 | CE1 | TYR D 826 | 107.142 | 60.244 | 81.899 | 1.00 | 0.00 | C |
| ATOM | 9876 | CE2 | TYR D 826 | 106.228 | 62.276 | 81.064 | 1.00 | 0.00 | C |
| ATOM | 9877 | CZ  | TYR D 826 | 106.137 | 60.916 | 81.250 | 1.00 | 0.00 | C |
| ATOM | 9878 | OH  | TYR D 826 | 105.015 | 60.207 | 80.769 | 1.00 | 0.00 | O |
| ATOM | 9879 | N   | SER D 827 | 110.384 | 64.882 | 80.362 | 1.00 | 0.00 | N |
| ATOM | 9880 | CA  | SER D 827 | 109.976 | 65.644 | 79.217 | 1.00 | 0.00 | C |
| ATOM | 9881 | C   | SER D 827 | 110.767 | 65.183 | 78.039 | 1.00 | 0.00 | C |
| ATOM | 9882 | O   | SER D 827 | 110.234 | 65.035 | 76.940 | 1.00 | 0.00 | O |
| ATOM | 9883 | CB  | SER D 827 | 110.227 | 67.152 | 79.374 | 1.00 | 0.00 | C |
| ATOM | 9884 | OG  | SER D 827 | 109.800 | 67.838 | 78.205 | 1.00 | 0.00 | O |
| ATOM | 9885 | N   | GLY D 828 | 112.072 | 64.929 | 78.239 | 1.00 | 0.00 | N |
| ATOM | 9886 | CA  | GLY D 828 | 112.905 | 64.518 | 77.149 | 1.00 | 0.00 | C |
| ATOM | 9887 | C   | GLY D 828 | 112.386 | 63.219 | 76.635 | 1.00 | 0.00 | C |
| ATOM | 9888 | O   | GLY D 828 | 112.344 | 62.990 | 75.428 | 1.00 | 0.00 | O |
| ATOM | 9889 | N   | ARG D 829 | 111.985 | 62.322 | 77.551 | 1.00 | 0.00 | N |
| ATOM | 9890 | CA  | ARG D 829 | 111.492 | 61.047 | 77.120 | 1.00 | 0.00 | C |
| ATOM | 9891 | C   | ARG D 829 | 110.234 | 61.251 | 76.347 | 1.00 | 0.00 | C |
| ATOM | 9892 | O   | ARG D 829 | 109.985 | 60.557 | 75.367 | 1.00 | 0.00 | O |
| ATOM | 9893 | CB  | ARG D 829 | 111.199 | 60.062 | 78.264 | 1.00 | 0.00 | C |

|      |      |     |     |   |     |         |        |        |      |      |   |
|------|------|-----|-----|---|-----|---------|--------|--------|------|------|---|
| ATOM | 9894 | CG  | ARG | D | 829 | 112.468 | 59.397 | 78.799 | 1.00 | 0.00 | C |
| ATOM | 9895 | CD  | ARG | D | 829 | 112.202 | 58.101 | 79.567 | 1.00 | 0.00 | C |
| ATOM | 9896 | NE  | ARG | D | 829 | 111.564 | 58.459 | 80.862 | 1.00 | 0.00 | N |
| ATOM | 9897 | CZ  | ARG | D | 829 | 112.337 | 58.575 | 81.983 | 1.00 | 0.00 | C |
| ATOM | 9898 | NH1 | ARG | D | 829 | 113.678 | 58.332 | 81.915 | 1.00 | 0.00 | N |
| ATOM | 9899 | NH2 | ARG | D | 829 | 111.764 | 58.931 | 83.168 | 1.00 | 0.00 | N |
| ATOM | 9900 | N   | VAL | D | 830 | 109.404 | 62.222 | 76.768 | 1.00 | 0.00 | N |
| ATOM | 9901 | CA  | VAL | D | 830 | 108.145 | 62.436 | 76.111 | 1.00 | 0.00 | C |
| ATOM | 9902 | C   | VAL | D | 830 | 108.381 | 62.797 | 74.677 | 1.00 | 0.00 | C |
| ATOM | 9903 | O   | VAL | D | 830 | 107.745 | 62.257 | 73.775 | 1.00 | 0.00 | O |
| ATOM | 9904 | CB  | VAL | D | 830 | 107.361 | 63.558 | 76.724 | 1.00 | 0.00 | C |
| ATOM | 9905 | CG1 | VAL | D | 830 | 106.090 | 63.782 | 75.888 | 1.00 | 0.00 | C |
| ATOM | 9906 | CG2 | VAL | D | 830 | 107.088 | 63.216 | 78.200 | 1.00 | 0.00 | C |
| ATOM | 9907 | N   | ILE | D | 831 | 109.331 | 63.708 | 74.431 | 1.00 | 0.00 | N |
| ATOM | 9908 | CA  | ILE | D | 831 | 109.623 | 64.204 | 73.119 | 1.00 | 0.00 | C |
| ATOM | 9909 | C   | ILE | D | 831 | 110.092 | 63.066 | 72.280 | 1.00 | 0.00 | C |
| ATOM | 9910 | O   | ILE | D | 831 | 109.726 | 62.934 | 71.112 | 1.00 | 0.00 | O |
| ATOM | 9911 | CB  | ILE | D | 831 | 110.780 | 65.143 | 73.185 | 1.00 | 0.00 | C |
| ATOM | 9912 | CG1 | ILE | D | 831 | 110.467 | 66.287 | 74.151 | 1.00 | 0.00 | C |
| ATOM | 9913 | CG2 | ILE | D | 831 | 111.145 | 65.587 | 71.766 | 1.00 | 0.00 | C |
| ATOM | 9914 | CD1 | ILE | D | 831 | 111.730 | 66.968 | 74.661 | 1.00 | 0.00 | C |
| ATOM | 9915 | N   | PHE | D | 832 | 110.938 | 62.217 | 72.879 | 1.00 | 0.00 | N |
| ATOM | 9916 | CA  | PHE | D | 832 | 111.587 | 61.140 | 72.198 | 1.00 | 0.00 | C |
| ATOM | 9917 | C   | PHE | D | 832 | 110.525 | 60.199 | 71.708 | 1.00 | 0.00 | C |
| ATOM | 9918 | O   | PHE | D | 832 | 110.583 | 59.722 | 70.577 | 1.00 | 0.00 | O |
| ATOM | 9919 | CB  | PHE | D | 832 | 112.529 | 60.402 | 73.168 | 1.00 | 0.00 | C |
| ATOM | 9920 | CG  | PHE | D | 832 | 113.663 | 59.763 | 72.439 | 1.00 | 0.00 | C |
| ATOM | 9921 | CD1 | PHE | D | 832 | 114.723 | 60.531 | 72.017 | 1.00 | 0.00 | C |
| ATOM | 9922 | CD2 | PHE | D | 832 | 113.700 | 58.413 | 72.208 | 1.00 | 0.00 | C |
| ATOM | 9923 | CE1 | PHE | D | 832 | 115.785 | 59.965 | 71.358 | 1.00 | 0.00 | C |
| ATOM | 9924 | CE2 | PHE | D | 832 | 114.760 | 57.834 | 71.548 | 1.00 | 0.00 | C |
| ATOM | 9925 | CZ  | PHE | D | 832 | 115.807 | 58.612 | 71.117 | 1.00 | 0.00 | C |
| ATOM | 9926 | N   | CYS | D | 833 | 109.521 | 59.911 | 72.558 | 1.00 | 0.00 | N |
| ATOM | 9927 | CA  | CYS | D | 833 | 108.460 | 59.008 | 72.203 | 1.00 | 0.00 | C |
| ATOM | 9928 | C   | CYS | D | 833 | 107.672 | 59.571 | 71.065 | 1.00 | 0.00 | C |
| ATOM | 9929 | O   | CYS | D | 833 | 107.333 | 58.856 | 70.123 | 1.00 | 0.00 | O |
| ATOM | 9930 | CB  | CYS | D | 833 | 107.474 | 58.771 | 73.362 | 1.00 | 0.00 | C |
| ATOM | 9931 | SG  | CYS | D | 833 | 106.132 | 57.627 | 72.914 | 1.00 | 0.00 | S |
| ATOM | 9932 | N   | LEU | D | 834 | 107.368 | 60.882 | 71.117 | 1.00 | 0.00 | N |
| ATOM | 9933 | CA  | LEU | D | 834 | 106.557 | 61.506 | 70.108 | 1.00 | 0.00 | C |
| ATOM | 9934 | C   | LEU | D | 834 | 107.273 | 61.431 | 68.801 | 1.00 | 0.00 | C |
| ATOM | 9935 | O   | LEU | D | 834 | 106.665 | 61.170 | 67.767 | 1.00 | 0.00 | O |
| ATOM | 9936 | CB  | LEU | D | 834 | 106.277 | 62.991 | 70.403 | 1.00 | 0.00 | C |
| ATOM | 9937 | CG  | LEU | D | 834 | 105.440 | 63.204 | 71.677 | 1.00 | 0.00 | C |



|      |      |               |         |        |        |      |      |   |
|------|------|---------------|---------|--------|--------|------|------|---|
| ATOM | 9938 | CD1 LEU D 834 | 105.157 | 64.694 | 71.920 | 1.00 | 0.00 | C |
| ATOM | 9939 | CD2 LEU D 834 | 104.164 | 62.346 | 71.658 | 1.00 | 0.00 | C |
| ATOM | 9940 | N ASP D 835   | 108.600 | 61.642 | 68.823 | 1.00 | 0.00 | N |
| ATOM | 9941 | CA ASP D 835  | 109.366 | 61.623 | 67.615 | 1.00 | 0.00 | C |
| ATOM | 9942 | C ASP D 835   | 109.228 | 60.258 | 67.033 | 1.00 | 0.00 | C |
| ATOM | 9943 | O ASP D 835   | 109.091 | 60.100 | 65.823 | 1.00 | 0.00 | O |
| ATOM | 9944 | CB ASP D 835  | 110.861 | 61.874 | 67.869 | 1.00 | 0.00 | C |
| ATOM | 9945 | CG ASP D 835  | 111.017 | 63.307 | 68.359 | 1.00 | 0.00 | C |
| ATOM | 9946 | OD1 ASP D 835 | 110.216 | 64.173 | 67.919 | 1.00 | 0.00 | O |
| ATOM | 9947 | OD2 ASP D 835 | 111.935 | 63.552 | 69.185 | 1.00 | 0.00 | O |
| ATOM | 9948 | N TYR D 836   | 109.214 | 59.237 | 67.902 | 1.00 | 0.00 | N |
| ATOM | 9949 | CA TYR D 836  | 109.116 | 57.872 | 67.475 | 1.00 | 0.00 | C |
| ATOM | 9950 | C TYR D 836   | 107.848 | 57.713 | 66.703 | 1.00 | 0.00 | C |
| ATOM | 9951 | O TYR D 836   | 107.832 | 57.074 | 65.653 | 1.00 | 0.00 | O |
| ATOM | 9952 | CB TYR D 836  | 109.054 | 56.896 | 68.664 | 1.00 | 0.00 | C |
| ATOM | 9953 | CG TYR D 836  | 108.645 | 55.549 | 68.166 | 1.00 | 0.00 | C |
| ATOM | 9954 | CD1 TYR D 836 | 109.566 | 54.662 | 67.667 | 1.00 | 0.00 | C |
| ATOM | 9955 | CD2 TYR D 836 | 107.321 | 55.180 | 68.211 | 1.00 | 0.00 | C |
| ATOM | 9956 | CE1 TYR D 836 | 109.165 | 53.426 | 67.214 | 1.00 | 0.00 | C |
| ATOM | 9957 | CE2 TYR D 836 | 106.914 | 53.946 | 67.759 | 1.00 | 0.00 | C |
| ATOM | 9958 | CZ TYR D 836  | 107.842 | 53.066 | 67.259 | 1.00 | 0.00 | C |
| ATOM | 9959 | OH TYR D 836  | 107.434 | 51.796 | 66.796 | 1.00 | 0.00 | O |
| ATOM | 9960 | N ILE D 837   | 106.749 | 58.305 | 67.200 | 1.00 | 0.00 | N |
| ATOM | 9961 | CA ILE D 837  | 105.477 | 58.140 | 66.563 | 1.00 | 0.00 | C |
| ATOM | 9962 | C ILE D 837   | 105.530 | 58.713 | 65.182 | 1.00 | 0.00 | C |
| ATOM | 9963 | O ILE D 837   | 105.081 | 58.082 | 64.228 | 1.00 | 0.00 | O |
| ATOM | 9964 | CB ILE D 837  | 104.370 | 58.840 | 67.292 | 1.00 | 0.00 | C |
| ATOM | 9965 | CG1 ILE D 837 | 104.230 | 58.286 | 68.718 | 1.00 | 0.00 | C |
| ATOM | 9966 | CG2 ILE D 837 | 103.094 | 58.692 | 66.448 | 1.00 | 0.00 | C |
| ATOM | 9967 | CD1 ILE D 837 | 103.334 | 59.141 | 69.614 | 1.00 | 0.00 | C |
| ATOM | 9968 | N ILE D 838   | 106.099 | 59.924 | 65.033 | 1.00 | 0.00 | N |
| ATOM | 9969 | CA ILE D 838  | 106.110 | 60.566 | 63.750 | 1.00 | 0.00 | C |
| ATOM | 9970 | C ILE D 838   | 106.930 | 59.770 | 62.788 | 1.00 | 0.00 | C |
| ATOM | 9971 | O ILE D 838   | 106.563 | 59.645 | 61.621 | 1.00 | 0.00 | O |
| ATOM | 9972 | CB ILE D 838  | 106.632 | 61.976 | 63.765 | 1.00 | 0.00 | C |
| ATOM | 9973 | CG1 ILE D 838 | 106.253 | 62.686 | 62.454 | 1.00 | 0.00 | C |
| ATOM | 9974 | CG2 ILE D 838 | 108.148 | 61.932 | 64.016 | 1.00 | 0.00 | C |
| ATOM | 9975 | CD1 ILE D 838 | 104.746 | 62.891 | 62.287 | 1.00 | 0.00 | C |
| ATOM | 9976 | N PHE D 839   | 108.068 | 59.210 | 63.243 | 1.00 | 0.00 | N |
| ATOM | 9977 | CA PHE D 839  | 108.902 | 58.473 | 62.340 | 1.00 | 0.00 | C |
| ATOM | 9978 | C PHE D 839   | 108.114 | 57.325 | 61.814 | 1.00 | 0.00 | C |
| ATOM | 9979 | O PHE D 839   | 108.155 | 57.022 | 60.624 | 1.00 | 0.00 | O |
| ATOM | 9980 | CB PHE D 839  | 110.197 | 57.920 | 62.966 | 1.00 | 0.00 | C |
| ATOM | 9981 | CG PHE D 839  | 111.102 | 59.075 | 63.233 | 1.00 | 0.00 | C |

|      |       |               |         |        |        |      |      |   |
|------|-------|---------------|---------|--------|--------|------|------|---|
| ATOM | 9982  | CD1 PHE D 839 | 111.673 | 59.768 | 62.188 | 1.00 | 0.00 | C |
| ATOM | 9983  | CD2 PHE D 839 | 111.405 | 59.452 | 64.517 | 1.00 | 0.00 | C |
| ATOM | 9984  | CE1 PHE D 839 | 112.510 | 60.833 | 62.423 | 1.00 | 0.00 | C |
| ATOM | 9985  | CE2 PHE D 839 | 112.240 | 60.517 | 64.763 | 1.00 | 0.00 | C |
| ATOM | 9986  | CZ PHE D 839  | 112.793 | 61.212 | 63.712 | 1.00 | 0.00 | C |
| ATOM | 9987  | N THR D 840   | 107.343 | 56.670 | 62.692 | 1.00 | 0.00 | N |
| ATOM | 9988  | CA THR D 840  | 106.578 | 55.523 | 62.315 | 1.00 | 0.00 | C |
| ATOM | 9989  | C THR D 840   | 105.603 | 55.965 | 61.267 | 1.00 | 0.00 | C |
| ATOM | 9990  | O THR D 840   | 105.367 | 55.262 | 60.286 | 1.00 | 0.00 | O |
| ATOM | 9991  | CB THR D 840  | 105.793 | 55.003 | 63.477 | 1.00 | 0.00 | C |
| ATOM | 9992  | CG2 THR D 840 | 105.199 | 53.643 | 63.095 | 1.00 | 0.00 | C |
| ATOM | 9993  | OG1 THR D 840 | 106.658 | 54.823 | 64.585 | 1.00 | 0.00 | O |
| ATOM | 9994  | N LEU D 841   | 105.036 | 57.172 | 61.443 | 1.00 | 0.00 | N |
| ATOM | 9995  | CA LEU D 841  | 104.038 | 57.674 | 60.544 | 1.00 | 0.00 | C |
| ATOM | 9996  | C LEU D 841   | 104.655 | 57.779 | 59.188 | 1.00 | 0.00 | C |
| ATOM | 9997  | O LEU D 841   | 104.020 | 57.479 | 58.178 | 1.00 | 0.00 | O |
| ATOM | 9998  | CB LEU D 841  | 103.531 | 59.070 | 60.941 | 1.00 | 0.00 | C |
| ATOM | 9999  | CG LEU D 841  | 102.458 | 59.622 | 59.986 | 1.00 | 0.00 | C |
| ATOM | 10000 | CD1 LEU D 841 | 101.180 | 58.768 | 60.039 | 1.00 | 0.00 | C |
| ATOM | 10001 | CD2 LEU D 841 | 102.187 | 61.110 | 60.247 | 1.00 | 0.00 | C |
| ATOM | 10002 | N ARG D 842   | 105.923 | 58.205 | 59.142 | 1.00 | 0.00 | N |
| ATOM | 10003 | CA ARG D 842  | 106.665 | 58.364 | 57.926 | 1.00 | 0.00 | C |
| ATOM | 10004 | C ARG D 842   | 106.725 | 57.029 | 57.252 | 1.00 | 0.00 | C |
| ATOM | 10005 | O ARG D 842   | 106.497 | 56.915 | 56.048 | 1.00 | 0.00 | O |
| ATOM | 10006 | CB ARG D 842  | 108.090 | 58.815 | 58.276 | 1.00 | 0.00 | C |
| ATOM | 10007 | CG ARG D 842  | 109.125 | 58.858 | 57.157 | 1.00 | 0.00 | C |
| ATOM | 10008 | CD ARG D 842  | 110.467 | 59.327 | 57.728 | 1.00 | 0.00 | C |
| ATOM | 10009 | NE ARG D 842  | 111.523 | 59.187 | 56.695 | 1.00 | 0.00 | N |
| ATOM | 10010 | CZ ARG D 842  | 112.771 | 59.666 | 56.966 | 1.00 | 0.00 | C |
| ATOM | 10011 | NH1 ARG D 842 | 113.008 | 60.333 | 58.136 | 1.00 | 0.00 | N |
| ATOM | 10012 | NH2 ARG D 842 | 113.786 | 59.481 | 56.074 | 1.00 | 0.00 | N |
| ATOM | 10013 | N LEU D 843   | 107.009 | 55.965 | 58.024 | 1.00 | 0.00 | N |
| ATOM | 10014 | CA LEU D 843  | 107.097 | 54.660 | 57.442 | 1.00 | 0.00 | C |
| ATOM | 10015 | C LEU D 843   | 105.770 | 54.283 | 56.883 | 1.00 | 0.00 | C |
| ATOM | 10016 | O LEU D 843   | 105.688 | 53.727 | 55.791 | 1.00 | 0.00 | O |
| ATOM | 10017 | CB LEU D 843  | 107.502 | 53.554 | 58.430 | 1.00 | 0.00 | C |
| ATOM | 10018 | CG LEU D 843  | 108.999 | 53.565 | 58.795 | 1.00 | 0.00 | C |
| ATOM | 10019 | CD1 LEU D 843 | 109.405 | 54.876 | 59.474 | 1.00 | 0.00 | C |
| ATOM | 10020 | CD2 LEU D 843 | 109.379 | 52.319 | 59.611 | 1.00 | 0.00 | C |
| ATOM | 10021 | N ILE D 844   | 104.685 | 54.612 | 57.603 | 1.00 | 0.00 | N |
| ATOM | 10022 | CA ILE D 844  | 103.381 | 54.212 | 57.178 | 1.00 | 0.00 | C |
| ATOM | 10023 | C ILE D 844   | 103.138 | 54.796 | 55.825 | 1.00 | 0.00 | C |
| ATOM | 10024 | O ILE D 844   | 102.644 | 54.116 | 54.927 | 1.00 | 0.00 | O |
| ATOM | 10025 | CB ILE D 844  | 102.317 | 54.734 | 58.094 | 1.00 | 0.00 | C |

|        |       |               |         |        |        |      |      |   |
|--------|-------|---------------|---------|--------|--------|------|------|---|
| ATOM   | 10026 | CG1 ILE D 844 | 102.529 | 54.166 | 59.505 | 1.00 | 0.00 | C |
| ATOM   | 10027 | CG2 ILE D 844 | 100.949 | 54.402 | 57.474 | 1.00 | 0.00 | C |
| ATOM   | 10028 | CD1 ILE D 844 | 101.779 | 54.925 | 60.594 | 1.00 | 0.00 | C |
| HETATM | 10029 | N HIE D 845   | 103.509 | 56.072 | 55.635 | 1.00 | 0.00 | N |
| HETATM | 10030 | CA HIE D 845  | 103.268 | 56.690 | 54.366 | 1.00 | 0.00 | C |
| HETATM | 10031 | C HIE D 845   | 104.051 | 55.961 | 53.321 | 1.00 | 0.00 | C |
| HETATM | 10032 | O HIE D 845   | 103.578 | 55.772 | 52.205 | 1.00 | 0.00 | O |
| HETATM | 10033 | CB HIE D 845  | 103.668 | 58.168 | 54.292 | 1.00 | 0.00 | C |
| HETATM | 10034 | CG HIE D 845  | 103.259 | 58.766 | 52.980 | 1.00 | 0.00 | C |
| HETATM | 10035 | CD2 HIE D 845 | 103.997 | 59.026 | 51.865 | 1.00 | 0.00 | C |
| HETATM | 10036 | ND1 HIE D 845 | 101.973 | 59.155 | 52.676 | 1.00 | 0.00 | N |
| HETATM | 10037 | CE1 HIE D 845 | 101.994 | 59.627 | 51.407 | 1.00 | 0.00 | C |
| HETATM | 10038 | NE2 HIE D 845 | 103.201 | 59.569 | 50.872 | 1.00 | 0.00 | N |
| ATOM   | 10039 | N ILE D 846   | 105.275 | 55.529 | 53.666 | 1.00 | 0.00 | N |
| ATOM   | 10040 | CA ILE D 846  | 106.112 | 54.863 | 52.714 | 1.00 | 0.00 | C |
| ATOM   | 10041 | C ILE D 846   | 105.413 | 53.615 | 52.272 | 1.00 | 0.00 | C |
| ATOM   | 10042 | O ILE D 846   | 105.385 | 53.300 | 51.084 | 1.00 | 0.00 | O |
| ATOM   | 10043 | CB ILE D 846  | 107.437 | 54.462 | 53.303 | 1.00 | 0.00 | C |
| ATOM   | 10044 | CG1 ILE D 846 | 108.186 | 55.708 | 53.807 | 1.00 | 0.00 | C |
| ATOM   | 10045 | CG2 ILE D 846 | 108.211 | 53.672 | 52.233 | 1.00 | 0.00 | C |
| ATOM   | 10046 | CD1 ILE D 846 | 109.396 | 55.383 | 54.685 | 1.00 | 0.00 | C |
| ATOM   | 10047 | N PHE D 847   | 104.809 | 52.881 | 53.224 | 1.00 | 0.00 | N |
| ATOM   | 10048 | CA PHE D 847  | 104.155 | 51.649 | 52.888 | 1.00 | 0.00 | C |
| ATOM   | 10049 | C PHE D 847   | 103.020 | 51.958 | 51.960 | 1.00 | 0.00 | C |
| ATOM   | 10050 | O PHE D 847   | 102.807 | 51.261 | 50.968 | 1.00 | 0.00 | O |
| ATOM   | 10051 | CB PHE D 847  | 103.516 | 50.936 | 54.095 | 1.00 | 0.00 | C |
| ATOM   | 10052 | CG PHE D 847  | 104.557 | 50.638 | 55.122 | 1.00 | 0.00 | C |
| ATOM   | 10053 | CD1 PHE D 847 | 105.525 | 49.681 | 54.904 | 1.00 | 0.00 | C |
| ATOM   | 10054 | CD2 PHE D 847 | 104.539 | 51.300 | 56.328 | 1.00 | 0.00 | C |
| ATOM   | 10055 | CE1 PHE D 847 | 106.469 | 49.420 | 55.866 | 1.00 | 0.00 | C |
| ATOM   | 10056 | CE2 PHE D 847 | 105.482 | 51.042 | 57.294 | 1.00 | 0.00 | C |
| ATOM   | 10057 | CZ PHE D 847  | 106.455 | 50.097 | 57.063 | 1.00 | 0.00 | C |
| ATOM   | 10058 | N THR D 848   | 102.270 | 53.033 | 52.262 | 1.00 | 0.00 | N |
| ATOM   | 10059 | CA THR D 848  | 101.085 | 53.387 | 51.536 | 1.00 | 0.00 | C |
| ATOM   | 10060 | C THR D 848   | 101.428 | 53.638 | 50.105 | 1.00 | 0.00 | C |
| ATOM   | 10061 | O THR D 848   | 100.777 | 53.127 | 49.196 | 1.00 | 0.00 | O |
| ATOM   | 10062 | CB THR D 848  | 100.498 | 54.670 | 52.034 | 1.00 | 0.00 | C |
| ATOM   | 10063 | CG2 THR D 848 | 99.163  | 54.909 | 51.314 | 1.00 | 0.00 | C |
| ATOM   | 10064 | OG1 THR D 848 | 100.284 | 54.593 | 53.434 | 1.00 | 0.00 | O |
| ATOM   | 10065 | N VAL D 849   | 102.475 | 54.440 | 49.862 | 1.00 | 0.00 | N |
| ATOM   | 10066 | CA VAL D 849  | 102.817 | 54.750 | 48.507 | 1.00 | 0.00 | C |
| ATOM   | 10067 | C VAL D 849   | 103.232 | 53.494 | 47.824 | 1.00 | 0.00 | C |
| ATOM   | 10068 | O VAL D 849   | 102.821 | 53.222 | 46.695 | 1.00 | 0.00 | O |
| ATOM   | 10069 | CB VAL D 849  | 103.968 | 55.707 | 48.405 | 1.00 | 0.00 | C |

|            |               |         |        |        |      |      |   |
|------------|---------------|---------|--------|--------|------|------|---|
| ATOM 10070 | CG1 VAL D 849 | 104.329 | 55.876 | 46.920 | 1.00 | 0.00 | C |
| ATOM 10071 | CG2 VAL D 849 | 103.578 | 57.018 | 49.110 | 1.00 | 0.00 | C |
| ATOM 10072 | N SER D 850   | 104.054 | 52.680 | 48.508 | 1.00 | 0.00 | N |
| ATOM 10073 | CA SER D 850  | 104.587 | 51.485 | 47.927 | 1.00 | 0.00 | C |
| ATOM 10074 | C SER D 850   | 103.464 | 50.564 | 47.581 | 1.00 | 0.00 | C |
| ATOM 10075 | O SER D 850   | 103.461 | 49.956 | 46.511 | 1.00 | 0.00 | O |
| ATOM 10076 | CB SER D 850  | 105.508 | 50.727 | 48.898 | 1.00 | 0.00 | C |
| ATOM 10077 | OG SER D 850  | 106.621 | 51.536 | 49.250 | 1.00 | 0.00 | O |
| ATOM 10078 | N ARG D 851   | 102.469 | 50.435 | 48.479 | 1.00 | 0.00 | N |
| ATOM 10079 | CA ARG D 851  | 101.394 | 49.522 | 48.230 | 1.00 | 0.00 | C |
| ATOM 10080 | C ARG D 851   | 100.619 | 49.947 | 47.024 | 1.00 | 0.00 | C |
| ATOM 10081 | O ARG D 851   | 100.286 | 49.112 | 46.183 | 1.00 | 0.00 | O |
| ATOM 10082 | CB ARG D 851  | 100.407 | 49.376 | 49.406 | 1.00 | 0.00 | C |
| ATOM 10083 | CG ARG D 851  | 99.732  | 50.681 | 49.842 | 1.00 | 0.00 | C |
| ATOM 10084 | CD ARG D 851  | 98.583  | 50.495 | 50.839 | 1.00 | 0.00 | C |
| ATOM 10085 | NE ARG D 851  | 97.358  | 50.156 | 50.061 | 1.00 | 0.00 | N |
| ATOM 10086 | CZ ARG D 851  | 96.475  | 51.142 | 49.721 | 1.00 | 0.00 | C |
| ATOM 10087 | NH1 ARG D 851 | 96.692  | 52.425 | 50.136 | 1.00 | 0.00 | N |
| ATOM 10088 | NH2 ARG D 851 | 95.373  | 50.846 | 48.973 | 1.00 | 0.00 | N |
| ATOM 10089 | N ASN D 852   | 100.317 | 51.255 | 46.889 | 1.00 | 0.00 | N |
| ATOM 10090 | CA ASN D 852  | 99.481  | 51.657 | 45.794 | 1.00 | 0.00 | C |
| ATOM 10091 | C ASN D 852   | 100.282 | 52.457 | 44.806 | 1.00 | 0.00 | C |
| ATOM 10092 | O ASN D 852   | 100.215 | 53.684 | 44.783 | 1.00 | 0.00 | O |
| ATOM 10093 | CB ASN D 852  | 98.318  | 52.539 | 46.270 | 1.00 | 0.00 | C |
| ATOM 10094 | CG ASN D 852  | 97.274  | 52.555 | 45.178 | 1.00 | 0.00 | C |
| ATOM 10095 | ND2 ASN D 852 | 96.063  | 53.074 | 45.521 | 1.00 | 0.00 | N |
| ATOM 10096 | OD1 ASN D 852 | 97.525  | 52.111 | 44.059 | 1.00 | 0.00 | O |
| ATOM 10097 | N LEU D 853   | 101.090 | 51.754 | 43.990 | 1.00 | 0.00 | N |
| ATOM 10098 | CA LEU D 853  | 101.915 | 52.271 | 42.931 | 1.00 | 0.00 | C |
| ATOM 10099 | C LEU D 853   | 101.093 | 52.584 | 41.716 | 1.00 | 0.00 | C |
| ATOM 10100 | O LEU D 853   | 101.415 | 53.501 | 40.965 | 1.00 | 0.00 | O |
| ATOM 10101 | CB LEU D 853  | 103.021 | 51.252 | 42.557 | 1.00 | 0.00 | C |
| ATOM 10102 | CG LEU D 853  | 104.062 | 51.669 | 41.490 | 1.00 | 0.00 | C |
| ATOM 10103 | CD1 LEU D 853 | 105.176 | 50.612 | 41.409 | 1.00 | 0.00 | C |
| ATOM 10104 | CD2 LEU D 853 | 103.458 | 51.903 | 40.097 | 1.00 | 0.00 | C |
| ATOM 10105 | N GLY D 854   | 100.018 | 51.801 | 41.492 | 1.00 | 0.00 | N |
| ATOM 10106 | CA GLY D 854  | 99.219  | 51.808 | 40.290 | 1.00 | 0.00 | C |
| ATOM 10107 | C GLY D 854   | 98.770  | 53.176 | 39.887 | 1.00 | 0.00 | C |
| ATOM 10108 | O GLY D 854   | 99.024  | 54.177 | 40.550 | 1.00 | 0.00 | O |
| ATOM 10109 | N PRO D 855   | 97.941  | 53.179 | 38.846 | 1.00 | 0.00 | N |
| ATOM 10110 | CA PRO D 855  | 97.294  | 54.338 | 38.289 | 1.00 | 0.00 | C |
| ATOM 10111 | C PRO D 855   | 96.569  | 55.108 | 39.334 | 1.00 | 0.00 | C |
| ATOM 10112 | O PRO D 855   | 96.157  | 56.243 | 39.100 | 1.00 | 0.00 | O |
| ATOM 10113 | CB PRO D 855  | 96.462  | 53.832 | 37.118 | 1.00 | 0.00 | C |

|            |     |           |         |        |        |      |      |     |
|------------|-----|-----------|---------|--------|--------|------|------|-----|
| ATOM 10114 | CG  | PRO D 855 | 97.269  | 52.616 | 36.627 | 1.00 | 0.00 | C   |
| ATOM 10115 | CD  | PRO D 855 | 97.978  | 52.088 | 37.887 | 1.00 | 0.00 | C   |
| ATOM 10116 | N   | LYS D 856 | 96.440  | 54.482 | 40.497 | 1.00 | 0.00 | N   |
| ATOM 10117 | CA  | LYS D 856 | 95.898  | 54.958 | 41.702 | 1.00 | 0.00 | C   |
| ATOM 10118 | C   | LYS D 856 | 96.711  | 56.112 | 42.213 | 1.00 | 0.00 | C   |
| ATOM 10119 | O   | LYS D 856 | 96.185  | 56.914 | 42.974 | 1.00 | 0.00 | O   |
| ATOM 10120 | CB  | LYS D 856 | 95.874  | 53.878 | 42.782 | 1.00 | 0.00 | C   |
| ATOM 10121 | CG  | LYS D 856 | 95.021  | 52.663 | 42.414 | 1.00 | 0.00 | C   |
| ATOM 10122 | CD  | LYS D 856 | 95.648  | 51.750 | 41.357 | 1.00 | 0.00 | C   |
| ATOM 10123 | CE  | LYS D 856 | 96.193  | 50.444 | 41.942 | 1.00 | 0.00 | C   |
| ATOM 10124 | NZ  | LYS D 856 | 96.656  | 49.552 | 40.855 | 1.00 | 0.00 | N1+ |
| ATOM 10125 | N   | ILE D 857 | 98.007  | 56.241 | 41.836 | 1.00 | 0.00 | N   |
| ATOM 10126 | CA  | ILE D 857 | 98.793  | 57.302 | 42.416 | 1.00 | 0.00 | C   |
| ATOM 10127 | C   | ILE D 857 | 98.166  | 58.624 | 42.159 | 1.00 | 0.00 | C   |
| ATOM 10128 | O   | ILE D 857 | 98.100  | 59.464 | 43.056 | 1.00 | 0.00 | O   |
| ATOM 10129 | CB  | ILE D 857 | 100.208 | 57.415 | 41.928 | 1.00 | 0.00 | C   |
| ATOM 10130 | CG1 | ILE D 857 | 100.893 | 58.592 | 42.637 | 1.00 | 0.00 | C   |
| ATOM 10131 | CG2 | ILE D 857 | 100.180 | 57.645 | 40.415 | 1.00 | 0.00 | C   |
| ATOM 10132 | CD1 | ILE D 857 | 100.899 | 58.506 | 44.159 | 1.00 | 0.00 | C   |
| ATOM 10133 | N   | ILE D 858 | 97.661  | 58.847 | 40.939 | 1.00 | 0.00 | N   |
| ATOM 10134 | CA  | ILE D 858 | 97.114  | 60.128 | 40.621 | 1.00 | 0.00 | C   |
| ATOM 10135 | C   | ILE D 858 | 95.991  | 60.407 | 41.575 | 1.00 | 0.00 | C   |
| ATOM 10136 | O   | ILE D 858 | 95.881  | 61.502 | 42.124 | 1.00 | 0.00 | O   |
| ATOM 10137 | CB  | ILE D 858 | 96.634  | 60.158 | 39.186 | 1.00 | 0.00 | C   |
| ATOM 10138 | CG1 | ILE D 858 | 96.422  | 61.589 | 38.686 | 1.00 | 0.00 | C   |
| ATOM 10139 | CG2 | ILE D 858 | 95.412  | 59.243 | 39.026 | 1.00 | 0.00 | C   |
| ATOM 10140 | CD1 | ILE D 858 | 97.717  | 62.277 | 38.267 | 1.00 | 0.00 | C   |
| ATOM 10141 | N   | MET D 859 | 95.137  | 59.396 | 41.821 | 1.00 | 0.00 | N   |
| ATOM 10142 | CA  | MET D 859 | 94.003  | 59.530 | 42.684 | 1.00 | 0.00 | C   |
| ATOM 10143 | C   | MET D 859 | 94.459  | 59.738 | 44.092 | 1.00 | 0.00 | C   |
| ATOM 10144 | O   | MET D 859 | 93.876  | 60.528 | 44.835 | 1.00 | 0.00 | O   |
| ATOM 10145 | CB  | MET D 859 | 93.106  | 58.279 | 42.655 | 1.00 | 0.00 | C   |
| ATOM 10146 | CG  | MET D 859 | 91.775  | 58.442 | 43.394 | 1.00 | 0.00 | C   |
| ATOM 10147 | SD  | MET D 859 | 91.889  | 58.479 | 45.206 | 1.00 | 0.00 | S   |
| ATOM 10148 | CE  | MET D 859 | 92.169  | 56.693 | 45.349 | 1.00 | 0.00 | C   |
| ATOM 10149 | N   | LEU D 860 | 95.533  | 59.032 | 44.480 | 1.00 | 0.00 | N   |
| ATOM 10150 | CA  | LEU D 860 | 96.002  | 59.013 | 45.833 | 1.00 | 0.00 | C   |
| ATOM 10151 | C   | LEU D 860 | 96.416  | 60.387 | 46.266 | 1.00 | 0.00 | C   |
| ATOM 10152 | O   | LEU D 860 | 96.064  | 60.821 | 47.365 | 1.00 | 0.00 | O   |
| ATOM 10153 | CB  | LEU D 860 | 97.183  | 58.022 | 45.978 | 1.00 | 0.00 | C   |
| ATOM 10154 | CG  | LEU D 860 | 97.701  | 57.727 | 47.402 | 1.00 | 0.00 | C   |
| ATOM 10155 | CD1 | LEU D 860 | 98.806  | 56.660 | 47.347 | 1.00 | 0.00 | C   |
| ATOM 10156 | CD2 | LEU D 860 | 98.181  | 58.985 | 48.148 | 1.00 | 0.00 | C   |
| ATOM 10157 | N   | GLN D 861 | 97.162  | 61.129 | 45.429 | 1.00 | 0.00 | N   |

|            |     |           |         |        |        |      |      |   |
|------------|-----|-----------|---------|--------|--------|------|------|---|
| ATOM 10158 | CA  | GLN D 861 | 97.653  | 62.400 | 45.886 | 1.00 | 0.00 | C |
| ATOM 10159 | C   | GLN D 861 | 96.529  | 63.363 | 46.127 | 1.00 | 0.00 | C |
| ATOM 10160 | O   | GLN D 861 | 96.515  | 64.061 | 47.140 | 1.00 | 0.00 | O |
| ATOM 10161 | CB  | GLN D 861 | 98.633  | 63.076 | 44.915 | 1.00 | 0.00 | C |
| ATOM 10162 | CG  | GLN D 861 | 99.177  | 64.390 | 45.484 | 1.00 | 0.00 | C |
| ATOM 10163 | CD  | GLN D 861 | 100.141 | 65.003 | 44.483 | 1.00 | 0.00 | C |
| ATOM 10164 | NE2 | GLN D 861 | 100.802 | 66.118 | 44.889 | 1.00 | 0.00 | N |
| ATOM 10165 | OE1 | GLN D 861 | 100.301 | 64.508 | 43.369 | 1.00 | 0.00 | O |
| ATOM 10166 | N   | ARG D 862 | 95.550  | 63.425 | 45.208 | 1.00 | 0.00 | N |
| ATOM 10167 | CA  | ARG D 862 | 94.470  | 64.368 | 45.324 | 1.00 | 0.00 | C |
| ATOM 10168 | C   | ARG D 862 | 93.679  | 64.046 | 46.550 | 1.00 | 0.00 | C |
| ATOM 10169 | O   | ARG D 862 | 93.260  | 64.934 | 47.288 | 1.00 | 0.00 | O |
| ATOM 10170 | CB  | ARG D 862 | 93.499  | 64.290 | 44.134 | 1.00 | 0.00 | C |
| ATOM 10171 | CG  | ARG D 862 | 92.333  | 65.273 | 44.208 | 1.00 | 0.00 | C |
| ATOM 10172 | CD  | ARG D 862 | 92.743  | 66.722 | 43.945 | 1.00 | 0.00 | C |
| ATOM 10173 | NE  | ARG D 862 | 91.496  | 67.535 | 43.936 | 1.00 | 0.00 | N |
| ATOM 10174 | CZ  | ARG D 862 | 91.003  | 68.037 | 45.105 | 1.00 | 0.00 | C |
| ATOM 10175 | NH1 | ARG D 862 | 91.682  | 67.834 | 46.272 | 1.00 | 0.00 | N |
| ATOM 10176 | NH2 | ARG D 862 | 89.834  | 68.742 | 45.106 | 1.00 | 0.00 | N |
| ATOM 10177 | N   | MET D 863 | 93.466  | 62.747 | 46.801 | 1.00 | 0.00 | N |
| ATOM 10178 | CA  | MET D 863 | 92.684  | 62.330 | 47.923 | 1.00 | 0.00 | C |
| ATOM 10179 | C   | MET D 863 | 93.380  | 62.786 | 49.159 | 1.00 | 0.00 | C |
| ATOM 10180 | O   | MET D 863 | 92.749  | 63.206 | 50.129 | 1.00 | 0.00 | O |
| ATOM 10181 | CB  | MET D 863 | 92.536  | 60.800 | 47.973 | 1.00 | 0.00 | C |
| ATOM 10182 | CG  | MET D 863 | 91.709  | 60.276 | 49.148 | 1.00 | 0.00 | C |
| ATOM 10183 | SD  | MET D 863 | 92.585  | 60.271 | 50.738 | 1.00 | 0.00 | S |
| ATOM 10184 | CE  | MET D 863 | 91.226  | 59.499 | 51.661 | 1.00 | 0.00 | C |
| ATOM 10185 | N   | LEU D 864 | 94.720  | 62.728 | 49.152 | 1.00 | 0.00 | N |
| ATOM 10186 | CA  | LEU D 864 | 95.471  | 63.093 | 50.310 | 1.00 | 0.00 | C |
| ATOM 10187 | C   | LEU D 864 | 95.212  | 64.533 | 50.618 | 1.00 | 0.00 | C |
| ATOM 10188 | O   | LEU D 864 | 94.963  | 64.896 | 51.765 | 1.00 | 0.00 | O |
| ATOM 10189 | CB  | LEU D 864 | 96.986  | 63.010 | 50.076 | 1.00 | 0.00 | C |
| ATOM 10190 | CG  | LEU D 864 | 97.813  | 63.275 | 51.346 | 1.00 | 0.00 | C |
| ATOM 10191 | CD1 | LEU D 864 | 97.882  | 62.020 | 52.227 | 1.00 | 0.00 | C |
| ATOM 10192 | CD2 | LEU D 864 | 99.175  | 63.899 | 51.018 | 1.00 | 0.00 | C |
| ATOM 10193 | N   | ILE D 865 | 95.262  | 65.400 | 49.594 | 1.00 | 0.00 | N |
| ATOM 10194 | CA  | ILE D 865 | 95.120  | 66.799 | 49.868 | 1.00 | 0.00 | C |
| ATOM 10195 | C   | ILE D 865 | 93.751  | 67.096 | 50.387 | 1.00 | 0.00 | C |
| ATOM 10196 | O   | ILE D 865 | 93.605  | 67.812 | 51.378 | 1.00 | 0.00 | O |
| ATOM 10197 | CB  | ILE D 865 | 95.392  | 67.678 | 48.679 | 1.00 | 0.00 | C |
| ATOM 10198 | CG1 | ILE D 865 | 95.520  | 69.140 | 49.130 | 1.00 | 0.00 | C |
| ATOM 10199 | CG2 | ILE D 865 | 94.310  | 67.446 | 47.614 | 1.00 | 0.00 | C |
| ATOM 10200 | CD1 | ILE D 865 | 96.105  | 70.058 | 48.059 | 1.00 | 0.00 | C |
| ATOM 10201 | N   | ASP D 866 | 92.697  | 66.546 | 49.751 | 1.00 | 0.00 | N |

|            |     |           |        |        |        |      |      |   |
|------------|-----|-----------|--------|--------|--------|------|------|---|
| ATOM 10202 | CA  | ASP D 866 | 91.382 | 66.902 | 50.193 | 1.00 | 0.00 | C |
| ATOM 10203 | C   | ASP D 866 | 91.118 | 66.395 | 51.580 | 1.00 | 0.00 | C |
| ATOM 10204 | O   | ASP D 866 | 90.479 | 67.082 | 52.377 | 1.00 | 0.00 | O |
| ATOM 10205 | CB  | ASP D 866 | 90.254 | 66.522 | 49.205 | 1.00 | 0.00 | C |
| ATOM 10206 | CG  | ASP D 866 | 90.194 | 65.033 | 48.900 | 1.00 | 0.00 | C |
| ATOM 10207 | OD1 | ASP D 866 | 90.442 | 64.203 | 49.810 | 1.00 | 0.00 | O |
| ATOM 10208 | OD2 | ASP D 866 | 89.893 | 64.708 | 47.723 | 1.00 | 0.00 | O |
| ATOM 10209 | N   | VAL D 867 | 91.616 | 65.192 | 51.923 | 1.00 | 0.00 | N |
| ATOM 10210 | CA  | VAL D 867 | 91.352 | 64.658 | 53.229 | 1.00 | 0.00 | C |
| ATOM 10211 | C   | VAL D 867 | 92.004 | 65.524 | 54.260 | 1.00 | 0.00 | C |
| ATOM 10212 | O   | VAL D 867 | 91.414 | 65.813 | 55.294 | 1.00 | 0.00 | O |
| ATOM 10213 | CB  | VAL D 867 | 91.848 | 63.255 | 53.414 | 1.00 | 0.00 | C |
| ATOM 10214 | CG1 | VAL D 867 | 91.088 | 62.346 | 52.437 | 1.00 | 0.00 | C |
| ATOM 10215 | CG2 | VAL D 867 | 93.375 | 63.230 | 53.250 | 1.00 | 0.00 | C |
| ATOM 10216 | N   | PHE D 868 | 93.243 | 65.984 | 54.001 | 1.00 | 0.00 | N |
| ATOM 10217 | CA  | PHE D 868 | 93.921 | 66.780 | 54.986 | 1.00 | 0.00 | C |
| ATOM 10218 | C   | PHE D 868 | 93.134 | 68.015 | 55.252 | 1.00 | 0.00 | C |
| ATOM 10219 | O   | PHE D 868 | 92.978 | 68.418 | 56.404 | 1.00 | 0.00 | O |
| ATOM 10220 | CB  | PHE D 868 | 95.337 | 67.219 | 54.576 | 1.00 | 0.00 | C |
| ATOM 10221 | CG  | PHE D 868 | 96.270 | 66.094 | 54.857 | 1.00 | 0.00 | C |
| ATOM 10222 | CD1 | PHE D 868 | 96.721 | 65.891 | 56.141 | 1.00 | 0.00 | C |
| ATOM 10223 | CD2 | PHE D 868 | 96.708 | 65.260 | 53.859 | 1.00 | 0.00 | C |
| ATOM 10224 | CE1 | PHE D 868 | 97.587 | 64.865 | 56.436 | 1.00 | 0.00 | C |
| ATOM 10225 | CE2 | PHE D 868 | 97.575 | 64.231 | 54.152 | 1.00 | 0.00 | C |
| ATOM 10226 | CZ  | PHE D 868 | 98.017 | 64.029 | 55.437 | 1.00 | 0.00 | C |
| ATOM 10227 | N   | PHE D 869 | 92.610 | 68.648 | 54.191 | 1.00 | 0.00 | N |
| ATOM 10228 | CA  | PHE D 869 | 91.866 | 69.857 | 54.362 | 1.00 | 0.00 | C |
| ATOM 10229 | C   | PHE D 869 | 90.695 | 69.537 | 55.248 | 1.00 | 0.00 | C |
| ATOM 10230 | O   | PHE D 869 | 90.427 | 70.240 | 56.220 | 1.00 | 0.00 | O |
| ATOM 10231 | CB  | PHE D 869 | 91.319 | 70.367 | 53.014 | 1.00 | 0.00 | C |
| ATOM 10232 | CG  | PHE D 869 | 90.607 | 71.662 | 53.205 | 1.00 | 0.00 | C |
| ATOM 10233 | CD1 | PHE D 869 | 91.308 | 72.848 | 53.208 | 1.00 | 0.00 | C |
| ATOM 10234 | CD2 | PHE D 869 | 89.241 | 71.696 | 53.371 | 1.00 | 0.00 | C |
| ATOM 10235 | CE1 | PHE D 869 | 90.659 | 74.047 | 53.382 | 1.00 | 0.00 | C |
| ATOM 10236 | CE2 | PHE D 869 | 88.584 | 72.892 | 53.544 | 1.00 | 0.00 | C |
| ATOM 10237 | CZ  | PHE D 869 | 89.294 | 74.070 | 53.551 | 1.00 | 0.00 | C |
| ATOM 10238 | N   | PHE D 870 | 89.997 | 68.427 | 54.949 | 1.00 | 0.00 | N |
| ATOM 10239 | CA  | PHE D 870 | 88.818 | 68.033 | 55.667 | 1.00 | 0.00 | C |
| ATOM 10240 | C   | PHE D 870 | 89.097 | 67.787 | 57.113 | 1.00 | 0.00 | C |
| ATOM 10241 | O   | PHE D 870 | 88.405 | 68.320 | 57.977 | 1.00 | 0.00 | O |
| ATOM 10242 | CB  | PHE D 870 | 88.189 | 66.756 | 55.077 | 1.00 | 0.00 | C |
| ATOM 10243 | CG  | PHE D 870 | 87.237 | 66.174 | 56.063 | 1.00 | 0.00 | C |
| ATOM 10244 | CD1 | PHE D 870 | 86.311 | 66.961 | 56.694 | 1.00 | 0.00 | C |
| ATOM 10245 | CD2 | PHE D 870 | 87.236 | 64.826 | 56.335 | 1.00 | 0.00 | C |

|            |               |        |        |        |      |      |   |
|------------|---------------|--------|--------|--------|------|------|---|
| ATOM 10246 | CE1 PHE D 870 | 85.409 | 66.440 | 57.594 | 1.00 | 0.00 | C |
| ATOM 10247 | CE2 PHE D 870 | 86.339 | 64.289 | 57.233 | 1.00 | 0.00 | C |
| ATOM 10248 | CZ PHE D 870  | 85.426 | 65.095 | 57.864 | 1.00 | 0.00 | C |
| ATOM 10249 | N LEU D 871   | 90.125 | 66.982 | 57.420 | 1.00 | 0.00 | N |
| ATOM 10250 | CA LEU D 871  | 90.372 | 66.673 | 58.796 | 1.00 | 0.00 | C |
| ATOM 10251 | C LEU D 871   | 90.732 | 67.923 | 59.525 | 1.00 | 0.00 | C |
| ATOM 10252 | O LEU D 871   | 90.335 | 68.109 | 60.672 | 1.00 | 0.00 | O |
| ATOM 10253 | CB LEU D 871  | 91.497 | 65.643 | 59.012 | 1.00 | 0.00 | C |
| ATOM 10254 | CG LEU D 871  | 91.087 | 64.193 | 58.691 | 1.00 | 0.00 | C |
| ATOM 10255 | CD1 LEU D 871 | 90.004 | 63.703 | 59.667 | 1.00 | 0.00 | C |
| ATOM 10256 | CD2 LEU D 871 | 90.676 | 64.011 | 57.223 | 1.00 | 0.00 | C |
| ATOM 10257 | N PHE D 872   | 91.482 | 68.831 | 58.873 | 1.00 | 0.00 | N |
| ATOM 10258 | CA PHE D 872  | 91.918 | 70.008 | 59.562 | 1.00 | 0.00 | C |
| ATOM 10259 | C PHE D 872   | 90.726 | 70.794 | 60.003 | 1.00 | 0.00 | C |
| ATOM 10260 | O PHE D 872   | 90.646 | 71.204 | 61.160 | 1.00 | 0.00 | O |
| ATOM 10261 | CB PHE D 872  | 92.791 | 70.930 | 58.691 | 1.00 | 0.00 | C |
| ATOM 10262 | CG PHE D 872  | 93.273 | 72.029 | 59.574 | 1.00 | 0.00 | C |
| ATOM 10263 | CD1 PHE D 872 | 94.348 | 71.828 | 60.409 | 1.00 | 0.00 | C |
| ATOM 10264 | CD2 PHE D 872 | 92.655 | 73.262 | 59.570 | 1.00 | 0.00 | C |
| ATOM 10265 | CE1 PHE D 872 | 94.801 | 72.834 | 61.229 | 1.00 | 0.00 | C |
| ATOM 10266 | CE2 PHE D 872 | 93.107 | 74.269 | 60.388 | 1.00 | 0.00 | C |
| ATOM 10267 | CZ PHE D 872  | 94.178 | 74.059 | 61.218 | 1.00 | 0.00 | C |
| ATOM 10268 | N LEU D 873   | 89.753 | 71.016 | 59.103 | 1.00 | 0.00 | N |
| ATOM 10269 | CA LEU D 873  | 88.611 | 71.802 | 59.468 | 1.00 | 0.00 | C |
| ATOM 10270 | C LEU D 873   | 87.806 | 71.114 | 60.526 | 1.00 | 0.00 | C |
| ATOM 10271 | O LEU D 873   | 87.290 | 71.758 | 61.437 | 1.00 | 0.00 | O |
| ATOM 10272 | CB LEU D 873  | 87.673 | 72.118 | 58.296 | 1.00 | 0.00 | C |
| ATOM 10273 | CG LEU D 873  | 88.223 | 73.209 | 57.358 | 1.00 | 0.00 | C |
| ATOM 10274 | CD1 LEU D 873 | 89.535 | 72.785 | 56.686 | 1.00 | 0.00 | C |
| ATOM 10275 | CD2 LEU D 873 | 87.149 | 73.654 | 56.360 | 1.00 | 0.00 | C |
| ATOM 10276 | N PHE D 874   | 87.661 | 69.784 | 60.444 | 1.00 | 0.00 | N |
| ATOM 10277 | CA PHE D 874  | 86.813 | 69.150 | 61.407 | 1.00 | 0.00 | C |
| ATOM 10278 | C PHE D 874   | 87.404 | 69.352 | 62.766 | 1.00 | 0.00 | C |
| ATOM 10279 | O PHE D 874   | 86.710 | 69.735 | 63.707 | 1.00 | 0.00 | O |
| ATOM 10280 | CB PHE D 874  | 86.673 | 67.638 | 61.162 | 1.00 | 0.00 | C |
| ATOM 10281 | CG PHE D 874  | 85.480 | 67.171 | 61.923 | 1.00 | 0.00 | C |
| ATOM 10282 | CD1 PHE D 874 | 84.224 | 67.292 | 61.368 | 1.00 | 0.00 | C |
| ATOM 10283 | CD2 PHE D 874 | 85.599 | 66.611 | 63.173 | 1.00 | 0.00 | C |
| ATOM 10284 | CE1 PHE D 874 | 83.108 | 66.868 | 62.048 | 1.00 | 0.00 | C |
| ATOM 10285 | CE2 PHE D 874 | 84.486 | 66.186 | 63.857 | 1.00 | 0.00 | C |
| ATOM 10286 | CZ PHE D 874  | 83.239 | 66.314 | 63.299 | 1.00 | 0.00 | C |
| ATOM 10287 | N ALA D 875   | 88.724 | 69.117 | 62.897 | 1.00 | 0.00 | N |
| ATOM 10288 | CA ALA D 875  | 89.387 | 69.230 | 64.164 | 1.00 | 0.00 | C |
| ATOM 10289 | C ALA D 875   | 89.310 | 70.643 | 64.647 | 1.00 | 0.00 | C |



|            |     |           |        |        |        |      |      |   |
|------------|-----|-----------|--------|--------|--------|------|------|---|
| ATOM 10290 | O   | ALA D 875 | 89.055 | 70.883 | 65.825 | 1.00 | 0.00 | O |
| ATOM 10291 | CB  | ALA D 875 | 90.876 | 68.849 | 64.086 | 1.00 | 0.00 | C |
| ATOM 10292 | N   | VAL D 876 | 89.520 | 71.620 | 63.744 | 1.00 | 0.00 | N |
| ATOM 10293 | CA  | VAL D 876 | 89.523 | 72.990 | 64.168 | 1.00 | 0.00 | C |
| ATOM 10294 | C   | VAL D 876 | 88.172 | 73.349 | 64.681 | 1.00 | 0.00 | C |
| ATOM 10295 | O   | VAL D 876 | 88.049 | 74.063 | 65.677 | 1.00 | 0.00 | O |
| ATOM 10296 | CB  | VAL D 876 | 89.921 | 73.961 | 63.089 | 1.00 | 0.00 | C |
| ATOM 10297 | CG1 | VAL D 876 | 91.366 | 73.629 | 62.682 | 1.00 | 0.00 | C |
| ATOM 10298 | CG2 | VAL D 876 | 88.912 | 73.907 | 61.931 | 1.00 | 0.00 | C |
| ATOM 10299 | N   | TRP D 877 | 87.107 | 72.865 | 64.023 | 1.00 | 0.00 | N |
| ATOM 10300 | CA  | TRP D 877 | 85.791 | 73.194 | 64.479 | 1.00 | 0.00 | C |
| ATOM 10301 | C   | TRP D 877 | 85.610 | 72.645 | 65.860 | 1.00 | 0.00 | C |
| ATOM 10302 | O   | TRP D 877 | 85.120 | 73.337 | 66.750 | 1.00 | 0.00 | O |
| ATOM 10303 | CB  | TRP D 877 | 84.681 | 72.593 | 63.599 | 1.00 | 0.00 | C |
| ATOM 10304 | CG  | TRP D 877 | 83.285 | 72.837 | 64.124 | 1.00 | 0.00 | C |
| ATOM 10305 | CD1 | TRP D 877 | 82.452 | 73.901 | 63.941 | 1.00 | 0.00 | C |
| ATOM 10306 | CD2 | TRP D 877 | 82.579 | 71.903 | 64.953 | 1.00 | 0.00 | C |
| ATOM 10307 | CE2 | TRP D 877 | 81.333 | 72.463 | 65.237 | 1.00 | 0.00 | C |
| ATOM 10308 | CE3 | TRP D 877 | 82.938 | 70.678 | 65.439 | 1.00 | 0.00 | C |
| ATOM 10309 | NE1 | TRP D 877 | 81.269 | 73.689 | 64.609 | 1.00 | 0.00 | N |
| ATOM 10310 | CZ2 | TRP D 877 | 80.424 | 71.801 | 66.016 | 1.00 | 0.00 | C |
| ATOM 10311 | CZ3 | TRP D 877 | 82.021 | 70.014 | 66.222 | 1.00 | 0.00 | C |
| ATOM 10312 | CH2 | TRP D 877 | 80.791 | 70.565 | 66.505 | 1.00 | 0.00 | C |
| ATOM 10313 | N   | MET D 878 | 86.024 | 71.383 | 66.076 | 1.00 | 0.00 | N |
| ATOM 10314 | CA  | MET D 878 | 85.809 | 70.739 | 67.338 | 1.00 | 0.00 | C |
| ATOM 10315 | C   | MET D 878 | 86.533 | 71.475 | 68.418 | 1.00 | 0.00 | C |
| ATOM 10316 | O   | MET D 878 | 85.978 | 71.723 | 69.487 | 1.00 | 0.00 | O |
| ATOM 10317 | CB  | MET D 878 | 86.333 | 69.293 | 67.356 | 1.00 | 0.00 | C |
| ATOM 10318 | CG  | MET D 878 | 85.630 | 68.375 | 66.354 | 1.00 | 0.00 | C |
| ATOM 10319 | SD  | MET D 878 | 86.227 | 66.656 | 66.350 | 1.00 | 0.00 | S |
| ATOM 10320 | CE  | MET D 878 | 87.846 | 67.058 | 65.627 | 1.00 | 0.00 | C |
| ATOM 10321 | N   | VAL D 879 | 87.795 | 71.864 | 68.162 | 1.00 | 0.00 | N |
| ATOM 10322 | CA  | VAL D 879 | 88.573 | 72.525 | 69.170 | 1.00 | 0.00 | C |
| ATOM 10323 | C   | VAL D 879 | 87.943 | 73.839 | 69.502 | 1.00 | 0.00 | C |
| ATOM 10324 | O   | VAL D 879 | 87.879 | 74.226 | 70.667 | 1.00 | 0.00 | O |
| ATOM 10325 | CB  | VAL D 879 | 89.994 | 72.788 | 68.763 | 1.00 | 0.00 | C |
| ATOM 10326 | CG1 | VAL D 879 | 90.009 | 73.756 | 67.570 | 1.00 | 0.00 | C |
| ATOM 10327 | CG2 | VAL D 879 | 90.745 | 73.322 | 69.993 | 1.00 | 0.00 | C |
| ATOM 10328 | N   | ALA D 880 | 87.451 | 74.556 | 68.476 | 1.00 | 0.00 | N |
| ATOM 10329 | CA  | ALA D 880 | 86.884 | 75.858 | 68.679 | 1.00 | 0.00 | C |
| ATOM 10330 | C   | ALA D 880 | 85.694 | 75.734 | 69.573 | 1.00 | 0.00 | C |
| ATOM 10331 | O   | ALA D 880 | 85.496 | 76.541 | 70.478 | 1.00 | 0.00 | O |
| ATOM 10332 | CB  | ALA D 880 | 86.406 | 76.505 | 67.367 | 1.00 | 0.00 | C |
| ATOM 10333 | N   | PHE D 881 | 84.865 | 74.705 | 69.344 | 1.00 | 0.00 | N |

|            |     |           |        |        |        |      |      |   |
|------------|-----|-----------|--------|--------|--------|------|------|---|
| ATOM 10334 | CA  | PHE D 881 | 83.682 | 74.529 | 70.130 | 1.00 | 0.00 | C |
| ATOM 10335 | C   | PHE D 881 | 84.101 | 74.281 | 71.542 | 1.00 | 0.00 | C |
| ATOM 10336 | O   | PHE D 881 | 83.540 | 74.851 | 72.478 | 1.00 | 0.00 | O |
| ATOM 10337 | CB  | PHE D 881 | 82.854 | 73.319 | 69.662 | 1.00 | 0.00 | C |
| ATOM 10338 | CG  | PHE D 881 | 81.642 | 73.188 | 70.515 | 1.00 | 0.00 | C |
| ATOM 10339 | CD1 | PHE D 881 | 80.526 | 73.957 | 70.269 | 1.00 | 0.00 | C |
| ATOM 10340 | CD2 | PHE D 881 | 81.607 | 72.287 | 71.554 | 1.00 | 0.00 | C |
| ATOM 10341 | CE1 | PHE D 881 | 79.402 | 73.837 | 71.052 | 1.00 | 0.00 | C |
| ATOM 10342 | CE2 | PHE D 881 | 80.486 | 72.163 | 72.340 | 1.00 | 0.00 | C |
| ATOM 10343 | CZ  | PHE D 881 | 79.380 | 72.937 | 72.092 | 1.00 | 0.00 | C |
| ATOM 10344 | N   | GLY D 882 | 85.127 | 73.431 | 71.726 | 1.00 | 0.00 | N |
| ATOM 10345 | CA  | GLY D 882 | 85.557 | 73.060 | 73.037 | 1.00 | 0.00 | C |
| ATOM 10346 | C   | GLY D 882 | 86.027 | 74.268 | 73.782 | 1.00 | 0.00 | C |
| ATOM 10347 | O   | GLY D 882 | 85.725 | 74.424 | 74.965 | 1.00 | 0.00 | O |
| ATOM 10348 | N   | VAL D 883 | 86.797 | 75.152 | 73.122 | 1.00 | 0.00 | N |
| ATOM 10349 | CA  | VAL D 883 | 87.281 | 76.300 | 73.824 | 1.00 | 0.00 | C |
| ATOM 10350 | C   | VAL D 883 | 86.118 | 77.156 | 74.208 | 1.00 | 0.00 | C |
| ATOM 10351 | O   | VAL D 883 | 86.079 | 77.710 | 75.304 | 1.00 | 0.00 | O |
| ATOM 10352 | CB  | VAL D 883 | 88.280 | 77.124 | 73.060 | 1.00 | 0.00 | C |
| ATOM 10353 | CG1 | VAL D 883 | 89.527 | 76.260 | 72.820 | 1.00 | 0.00 | C |
| ATOM 10354 | CG2 | VAL D 883 | 87.646 | 77.647 | 71.767 | 1.00 | 0.00 | C |
| ATOM 10355 | N   | ALA D 884 | 85.122 | 77.275 | 73.314 | 1.00 | 0.00 | N |
| ATOM 10356 | CA  | ALA D 884 | 83.990 | 78.112 | 73.596 | 1.00 | 0.00 | C |
| ATOM 10357 | C   | ALA D 884 | 83.288 | 77.580 | 74.806 | 1.00 | 0.00 | C |
| ATOM 10358 | O   | ALA D 884 | 82.892 | 78.340 | 75.688 | 1.00 | 0.00 | O |
| ATOM 10359 | CB  | ALA D 884 | 82.971 | 78.133 | 72.444 | 1.00 | 0.00 | C |
| ATOM 10360 | N   | ARG D 885 | 83.123 | 76.247 | 74.888 | 1.00 | 0.00 | N |
| ATOM 10361 | CA  | ARG D 885 | 82.411 | 75.653 | 75.982 | 1.00 | 0.00 | C |
| ATOM 10362 | C   | ARG D 885 | 83.147 | 75.913 | 77.254 | 1.00 | 0.00 | C |
| ATOM 10363 | O   | ARG D 885 | 82.542 | 76.242 | 78.273 | 1.00 | 0.00 | O |
| ATOM 10364 | CB  | ARG D 885 | 82.274 | 74.127 | 75.856 | 1.00 | 0.00 | C |
| ATOM 10365 | CG  | ARG D 885 | 81.363 | 73.683 | 74.710 | 1.00 | 0.00 | C |
| ATOM 10366 | CD  | ARG D 885 | 79.926 | 73.380 | 75.142 | 1.00 | 0.00 | C |
| ATOM 10367 | NE  | ARG D 885 | 79.216 | 74.678 | 75.321 | 1.00 | 0.00 | N |
| ATOM 10368 | CZ  | ARG D 885 | 79.171 | 75.269 | 76.552 | 1.00 | 0.00 | C |
| ATOM 10369 | NH1 | ARG D 885 | 79.777 | 74.672 | 77.618 | 1.00 | 0.00 | N |
| ATOM 10370 | NH2 | ARG D 885 | 78.517 | 76.456 | 76.719 | 1.00 | 0.00 | N |
| ATOM 10371 | N   | GLN D 886 | 84.484 | 75.784 | 77.228 | 1.00 | 0.00 | N |
| ATOM 10372 | CA  | GLN D 886 | 85.218 | 75.956 | 78.443 | 1.00 | 0.00 | C |
| ATOM 10373 | C   | GLN D 886 | 85.009 | 77.355 | 78.912 | 1.00 | 0.00 | C |
| ATOM 10374 | O   | GLN D 886 | 84.813 | 77.594 | 80.103 | 1.00 | 0.00 | O |
| ATOM 10375 | CB  | GLN D 886 | 86.727 | 75.763 | 78.268 | 1.00 | 0.00 | C |
| ATOM 10376 | CG  | GLN D 886 | 87.489 | 75.818 | 79.590 | 1.00 | 0.00 | C |
| ATOM 10377 | CD  | GLN D 886 | 88.959 | 75.900 | 79.235 | 1.00 | 0.00 | C |

|            |     |           |        |        |        |      |      |   |
|------------|-----|-----------|--------|--------|--------|------|------|---|
| ATOM 10378 | NE2 | GLN D 886 | 89.851 | 75.577 | 80.210 | 1.00 | 0.00 | N |
| ATOM 10379 | OE1 | GLN D 886 | 89.299 | 76.266 | 78.111 | 1.00 | 0.00 | O |
| ATOM 10380 | N   | GLY D 887 | 85.034 | 78.322 | 77.977 | 1.00 | 0.00 | N |
| ATOM 10381 | CA  | GLY D 887 | 84.886 | 79.696 | 78.355 | 1.00 | 0.00 | C |
| ATOM 10382 | C   | GLY D 887 | 83.536 | 79.887 | 78.968 | 1.00 | 0.00 | C |
| ATOM 10383 | O   | GLY D 887 | 83.390 | 80.585 | 79.971 | 1.00 | 0.00 | O |
| ATOM 10384 | N   | ILE D 888 | 82.504 | 79.274 | 78.365 | 1.00 | 0.00 | N |
| ATOM 10385 | CA  | ILE D 888 | 81.164 | 79.430 | 78.841 | 1.00 | 0.00 | C |
| ATOM 10386 | C   | ILE D 888 | 81.033 | 78.837 | 80.207 | 1.00 | 0.00 | C |
| ATOM 10387 | O   | ILE D 888 | 80.441 | 79.444 | 81.099 | 1.00 | 0.00 | O |
| ATOM 10388 | CB  | ILE D 888 | 80.155 | 78.739 | 77.969 | 1.00 | 0.00 | C |
| ATOM 10389 | CG1 | ILE D 888 | 80.141 | 79.360 | 76.564 | 1.00 | 0.00 | C |
| ATOM 10390 | CG2 | ILE D 888 | 78.796 | 78.794 | 78.685 | 1.00 | 0.00 | C |
| ATOM 10391 | CD1 | ILE D 888 | 79.756 | 80.839 | 76.554 | 1.00 | 0.00 | C |
| ATOM 10392 | N   | LEU D 889 | 81.603 | 77.637 | 80.413 | 1.00 | 0.00 | N |
| ATOM 10393 | CA  | LEU D 889 | 81.394 | 76.936 | 81.643 | 1.00 | 0.00 | C |
| ATOM 10394 | C   | LEU D 889 | 81.912 | 77.729 | 82.799 | 1.00 | 0.00 | C |
| ATOM 10395 | O   | LEU D 889 | 81.195 | 77.952 | 83.772 | 1.00 | 0.00 | O |
| ATOM 10396 | CB  | LEU D 889 | 82.120 | 75.576 | 81.684 | 1.00 | 0.00 | C |
| ATOM 10397 | CG  | LEU D 889 | 81.659 | 74.587 | 80.600 | 1.00 | 0.00 | C |
| ATOM 10398 | CD1 | LEU D 889 | 82.417 | 73.254 | 80.701 | 1.00 | 0.00 | C |
| ATOM 10399 | CD2 | LEU D 889 | 80.132 | 74.410 | 80.612 | 1.00 | 0.00 | C |
| ATOM 10400 | N   | ARG D 890 | 83.170 | 78.198 | 82.722 | 1.00 | 0.00 | N |
| ATOM 10401 | CA  | ARG D 890 | 83.709 | 78.899 | 83.846 | 1.00 | 0.00 | C |
| ATOM 10402 | C   | ARG D 890 | 84.913 | 79.634 | 83.363 | 1.00 | 0.00 | C |
| ATOM 10403 | O   | ARG D 890 | 85.296 | 79.522 | 82.200 | 1.00 | 0.00 | O |
| ATOM 10404 | CB  | ARG D 890 | 84.181 | 77.955 | 84.965 | 1.00 | 0.00 | C |
| ATOM 10405 | CG  | ARG D 890 | 85.280 | 76.994 | 84.501 | 1.00 | 0.00 | C |
| ATOM 10406 | CD  | ARG D 890 | 85.641 | 75.909 | 85.515 | 1.00 | 0.00 | C |
| ATOM 10407 | NE  | ARG D 890 | 84.702 | 74.770 | 85.314 | 1.00 | 0.00 | N |
| ATOM 10408 | CZ  | ARG D 890 | 83.565 | 74.675 | 86.064 | 1.00 | 0.00 | C |
| ATOM 10409 | NH1 | ARG D 890 | 83.294 | 75.617 | 87.015 | 1.00 | 0.00 | N |
| ATOM 10410 | NH2 | ARG D 890 | 82.705 | 73.634 | 85.868 | 1.00 | 0.00 | N |
| ATOM 10411 | N   | GLN D 891 | 85.540 | 80.429 | 84.250 | 1.00 | 0.00 | N |
| ATOM 10412 | CA  | GLN D 891 | 86.724 | 81.111 | 83.833 | 1.00 | 0.00 | C |
| ATOM 10413 | C   | GLN D 891 | 87.783 | 80.076 | 83.670 | 1.00 | 0.00 | C |
| ATOM 10414 | O   | GLN D 891 | 87.778 | 79.050 | 84.350 | 1.00 | 0.00 | O |
| ATOM 10415 | CB  | GLN D 891 | 87.217 | 82.194 | 84.811 | 1.00 | 0.00 | C |
| ATOM 10416 | CG  | GLN D 891 | 87.544 | 81.680 | 86.213 | 1.00 | 0.00 | C |
| ATOM 10417 | CD  | GLN D 891 | 86.241 | 81.645 | 86.994 | 1.00 | 0.00 | C |
| ATOM 10418 | NE2 | GLN D 891 | 85.264 | 82.492 | 86.572 | 1.00 | 0.00 | N |
| ATOM 10419 | OE1 | GLN D 891 | 86.093 | 80.890 | 87.954 | 1.00 | 0.00 | O |
| ATOM 10420 | N   | ASN D 892 | 88.709 | 80.308 | 82.722 | 1.00 | 0.00 | N |
| ATOM 10421 | CA  | ASN D 892 | 89.744 | 79.353 | 82.473 | 1.00 | 0.00 | C |

|            |     |           |        |        |        |      |      |   |
|------------|-----|-----------|--------|--------|--------|------|------|---|
| ATOM 10422 | C   | ASN D 892 | 90.621 | 79.379 | 83.664 | 1.00 | 0.00 | C |
| ATOM 10423 | O   | ASN D 892 | 90.800 | 80.416 | 84.301 | 1.00 | 0.00 | O |
| ATOM 10424 | CB  | ASN D 892 | 90.613 | 79.708 | 81.256 | 1.00 | 0.00 | C |
| ATOM 10425 | CG  | ASN D 892 | 89.717 | 79.684 | 80.030 | 1.00 | 0.00 | C |
| ATOM 10426 | ND2 | ASN D 892 | 89.868 | 78.628 | 79.188 | 1.00 | 0.00 | N |
| ATOM 10427 | OD1 | ASN D 892 | 88.903 | 80.582 | 79.820 | 1.00 | 0.00 | O |
| ATOM 10428 | N   | GLU D 893 | 91.198 | 78.223 | 84.020 | 1.00 | 0.00 | N |
| ATOM 10429 | CA  | GLU D 893 | 92.026 | 78.300 | 85.175 | 1.00 | 0.00 | C |
| ATOM 10430 | C   | GLU D 893 | 93.362 | 78.808 | 84.721 | 1.00 | 0.00 | C |
| ATOM 10431 | O   | GLU D 893 | 94.089 | 78.074 | 84.035 | 1.00 | 0.00 | O |
| ATOM 10432 | CB  | GLU D 893 | 92.213 | 76.957 | 85.873 | 1.00 | 0.00 | C |
| ATOM 10433 | CG  | GLU D 893 | 92.876 | 77.020 | 87.241 | 1.00 | 0.00 | C |
| ATOM 10434 | CD  | GLU D 893 | 91.808 | 77.349 | 88.274 | 1.00 | 0.00 | C |
| ATOM 10435 | OE1 | GLU D 893 | 90.612 | 77.417 | 87.891 | 1.00 | 0.00 | O |
| ATOM 10436 | OE2 | GLU D 893 | 92.177 | 77.533 | 89.467 | 1.00 | 0.00 | O |
| ATOM 10437 | N   | GLN D 894 | 93.661 | 80.096 | 85.079 | 1.00 | 0.00 | N |
| ATOM 10438 | CA  | GLN D 894 | 94.870 | 80.814 | 84.757 | 1.00 | 0.00 | C |
| ATOM 10439 | C   | GLN D 894 | 96.001 | 80.186 | 85.492 | 1.00 | 0.00 | C |
| ATOM 10440 | O   | GLN D 894 | 97.069 | 79.950 | 84.927 | 1.00 | 0.00 | O |
| ATOM 10441 | CB  | GLN D 894 | 94.821 | 82.301 | 85.145 | 1.00 | 0.00 | C |
| ATOM 10442 | CG  | GLN D 894 | 94.729 | 82.557 | 86.650 | 1.00 | 0.00 | C |
| ATOM 10443 | CD  | GLN D 894 | 94.692 | 84.063 | 86.860 | 1.00 | 0.00 | C |
| ATOM 10444 | NE2 | GLN D 894 | 93.670 | 84.733 | 86.258 | 1.00 | 0.00 | N |
| ATOM 10445 | OE1 | GLN D 894 | 95.548 | 84.630 | 87.534 | 1.00 | 0.00 | O |
| ATOM 10446 | N   | ARG D 895 | 95.787 | 79.893 | 86.786 | 1.00 | 0.00 | N |
| ATOM 10447 | CA  | ARG D 895 | 96.830 | 79.260 | 87.528 | 1.00 | 0.00 | C |
| ATOM 10448 | C   | ARG D 895 | 97.062 | 77.934 | 86.898 | 1.00 | 0.00 | C |
| ATOM 10449 | O   | ARG D 895 | 98.203 | 77.541 | 86.664 | 1.00 | 0.00 | O |
| ATOM 10450 | CB  | ARG D 895 | 96.470 | 78.994 | 88.996 | 1.00 | 0.00 | C |
| ATOM 10451 | CG  | ARG D 895 | 96.473 | 80.244 | 89.879 | 1.00 | 0.00 | C |
| ATOM 10452 | CD  | ARG D 895 | 97.840 | 80.933 | 89.931 | 1.00 | 0.00 | C |
| ATOM 10453 | NE  | ARG D 895 | 97.841 | 81.848 | 91.105 | 1.00 | 0.00 | N |
| ATOM 10454 | CZ  | ARG D 895 | 97.294 | 83.098 | 91.015 | 1.00 | 0.00 | C |
| ATOM 10455 | NH1 | ARG D 895 | 96.681 | 83.498 | 89.865 | 1.00 | 0.00 | N |
| ATOM 10456 | NH2 | ARG D 895 | 97.361 | 83.944 | 92.084 | 1.00 | 0.00 | N |
| ATOM 10457 | N   | TRP D 896 | 95.971 | 77.210 | 86.585 | 1.00 | 0.00 | N |
| ATOM 10458 | CA  | TRP D 896 | 96.167 | 75.908 | 86.024 | 1.00 | 0.00 | C |
| ATOM 10459 | C   | TRP D 896 | 95.705 | 75.932 | 84.608 | 1.00 | 0.00 | C |
| ATOM 10460 | O   | TRP D 896 | 94.598 | 75.487 | 84.293 | 1.00 | 0.00 | O |
| ATOM 10461 | CB  | TRP D 896 | 95.370 | 74.834 | 86.780 | 1.00 | 0.00 | C |
| ATOM 10462 | CG  | TRP D 896 | 95.860 | 74.568 | 88.188 | 1.00 | 0.00 | C |
| ATOM 10463 | CD1 | TRP D 896 | 96.704 | 73.595 | 88.636 | 1.00 | 0.00 | C |
| ATOM 10464 | CD2 | TRP D 896 | 95.496 | 75.346 | 89.341 | 1.00 | 0.00 | C |
| ATOM 10465 | CE2 | TRP D 896 | 96.145 | 74.786 | 90.441 | 1.00 | 0.00 | C |

|            |               |         |        |        |      |      |   |
|------------|---------------|---------|--------|--------|------|------|---|
| ATOM 10466 | CE3 TRP D 896 | 94.691  | 76.437 | 89.475 | 1.00 | 0.00 | C |
| ATOM 10467 | NE1 TRP D 896 | 96.883  | 73.713 | 89.994 | 1.00 | 0.00 | N |
| ATOM 10468 | CZ2 TRP D 896 | 95.998  | 75.316 | 91.692 | 1.00 | 0.00 | C |
| ATOM 10469 | CZ3 TRP D 896 | 94.541  | 76.965 | 90.739 | 1.00 | 0.00 | C |
| ATOM 10470 | CH2 TRP D 896 | 95.180  | 76.415 | 91.829 | 1.00 | 0.00 | C |
| ATOM 10471 | N ARG D 897   | 96.550  | 76.465 | 83.707 | 1.00 | 0.00 | N |
| ATOM 10472 | CA ARG D 897  | 96.208  | 76.491 | 82.318 | 1.00 | 0.00 | C |
| ATOM 10473 | C ARG D 897   | 96.241  | 75.092 | 81.807 | 1.00 | 0.00 | C |
| ATOM 10474 | O ARG D 897   | 95.385  | 74.668 | 81.035 | 1.00 | 0.00 | O |
| ATOM 10475 | CB ARG D 897  | 97.197  | 77.287 | 81.460 | 1.00 | 0.00 | C |
| ATOM 10476 | CG ARG D 897  | 96.711  | 77.401 | 80.016 | 1.00 | 0.00 | C |
| ATOM 10477 | CD ARG D 897  | 97.750  | 77.911 | 79.024 | 1.00 | 0.00 | C |
| ATOM 10478 | NE ARG D 897  | 97.031  | 78.144 | 77.741 | 1.00 | 0.00 | N |
| ATOM 10479 | CZ ARG D 897  | 97.641  | 77.905 | 76.543 | 1.00 | 0.00 | C |
| ATOM 10480 | NH1 ARG D 897 | 98.910  | 77.400 | 76.506 | 1.00 | 0.00 | N |
| ATOM 10481 | NH2 ARG D 897 | 96.976  | 78.169 | 75.379 | 1.00 | 0.00 | N |
| ATOM 10482 | N TRP D 898   | 97.256  | 74.336 | 82.255 | 1.00 | 0.00 | N |
| ATOM 10483 | CA TRP D 898  | 97.473  | 73.011 | 81.761 | 1.00 | 0.00 | C |
| ATOM 10484 | C TRP D 898   | 96.311  | 72.138 | 82.086 | 1.00 | 0.00 | C |
| ATOM 10485 | O TRP D 898   | 95.763  | 71.475 | 81.204 | 1.00 | 0.00 | O |
| ATOM 10486 | CB TRP D 898  | 98.697  | 72.325 | 82.391 | 1.00 | 0.00 | C |
| ATOM 10487 | CG TRP D 898  | 100.018 | 72.972 | 82.067 | 1.00 | 0.00 | C |
| ATOM 10488 | CD1 TRP D 898 | 100.846 | 73.701 | 82.868 | 1.00 | 0.00 | C |
| ATOM 10489 | CD2 TRP D 898 | 100.639 | 72.923 | 80.774 | 1.00 | 0.00 | C |
| ATOM 10490 | CE2 TRP D 898 | 101.832 | 73.637 | 80.864 | 1.00 | 0.00 | C |
| ATOM 10491 | CE3 TRP D 898 | 100.242 | 72.340 | 79.606 | 1.00 | 0.00 | C |
| ATOM 10492 | NE1 TRP D 898 | 101.948 | 74.107 | 82.158 | 1.00 | 0.00 | N |
| ATOM 10493 | CZ2 TRP D 898 | 102.653 | 73.776 | 79.784 | 1.00 | 0.00 | C |
| ATOM 10494 | CZ3 TRP D 898 | 101.075 | 72.481 | 78.518 | 1.00 | 0.00 | C |
| ATOM 10495 | CH2 TRP D 898 | 102.257 | 73.185 | 78.606 | 1.00 | 0.00 | C |
| ATOM 10496 | N ILE D 899   | 95.891  | 72.113 | 83.363 | 1.00 | 0.00 | N |
| ATOM 10497 | CA ILE D 899  | 94.861  | 71.181 | 83.711 | 1.00 | 0.00 | C |
| ATOM 10498 | C ILE D 899   | 93.594  | 71.540 | 83.010 | 1.00 | 0.00 | C |
| ATOM 10499 | O ILE D 899   | 92.934  | 70.673 | 82.440 | 1.00 | 0.00 | O |
| ATOM 10500 | CB ILE D 899  | 94.604  | 71.080 | 85.190 | 1.00 | 0.00 | C |
| ATOM 10501 | CG1 ILE D 899 | 93.675  | 69.894 | 85.496 | 1.00 | 0.00 | C |
| ATOM 10502 | CG2 ILE D 899 | 94.076  | 72.426 | 85.690 | 1.00 | 0.00 | C |
| ATOM 10503 | CD1 ILE D 899 | 93.576  | 69.566 | 86.986 | 1.00 | 0.00 | C |
| ATOM 10504 | N PHE D 900   | 93.226  | 72.834 | 83.014 | 1.00 | 0.00 | N |
| ATOM 10505 | CA PHE D 900  | 91.999  | 73.222 | 82.386 | 1.00 | 0.00 | C |
| ATOM 10506 | C PHE D 900   | 92.058  | 72.963 | 80.921 | 1.00 | 0.00 | C |
| ATOM 10507 | O PHE D 900   | 91.098  | 72.450 | 80.355 | 1.00 | 0.00 | O |
| ATOM 10508 | CB PHE D 900  | 91.652  | 74.692 | 82.649 | 1.00 | 0.00 | C |
| ATOM 10509 | CG PHE D 900  | 91.088  | 74.707 | 84.026 | 1.00 | 0.00 | C |

|            |               |        |        |        |      |      |   |
|------------|---------------|--------|--------|--------|------|------|---|
| ATOM 10510 | CD1 PHE D 900 | 91.809 | 74.189 | 85.074 | 1.00 | 0.00 | C |
| ATOM 10511 | CD2 PHE D 900 | 89.810 | 75.158 | 84.255 | 1.00 | 0.00 | C |
| ATOM 10512 | CE1 PHE D 900 | 91.297 | 74.194 | 86.350 | 1.00 | 0.00 | C |
| ATOM 10513 | CE2 PHE D 900 | 89.291 | 75.164 | 85.530 | 1.00 | 0.00 | C |
| ATOM 10514 | CZ PHE D 900  | 90.037 | 74.690 | 86.581 | 1.00 | 0.00 | C |
| ATOM 10515 | N ARG D 901   | 93.185 | 73.301 | 80.264 | 1.00 | 0.00 | N |
| ATOM 10516 | CA ARG D 901  | 93.249 | 73.099 | 78.841 | 1.00 | 0.00 | C |
| ATOM 10517 | C ARG D 901   | 93.111 | 71.641 | 78.550 | 1.00 | 0.00 | C |
| ATOM 10518 | O ARG D 901   | 92.367 | 71.248 | 77.655 | 1.00 | 0.00 | O |
| ATOM 10519 | CB ARG D 901  | 94.569 | 73.561 | 78.202 | 1.00 | 0.00 | C |
| ATOM 10520 | CG ARG D 901  | 94.544 | 73.455 | 76.672 | 1.00 | 0.00 | C |
| ATOM 10521 | CD ARG D 901  | 95.833 | 73.905 | 75.986 | 1.00 | 0.00 | C |
| ATOM 10522 | NE ARG D 901  | 96.680 | 72.698 | 75.779 | 1.00 | 0.00 | N |
| ATOM 10523 | CZ ARG D 901  | 97.580 | 72.322 | 76.733 | 1.00 | 0.00 | C |
| ATOM 10524 | NH1 ARG D 901 | 97.716 | 73.063 | 77.873 | 1.00 | 0.00 | N |
| ATOM 10525 | NH2 ARG D 901 | 98.344 | 71.205 | 76.549 | 1.00 | 0.00 | N |
| ATOM 10526 | N SER D 902   | 93.822 | 70.794 | 79.318 | 1.00 | 0.00 | N |
| ATOM 10527 | CA SER D 902  | 93.780 | 69.382 | 79.060 | 1.00 | 0.00 | C |
| ATOM 10528 | C SER D 902   | 92.379 | 68.915 | 79.263 | 1.00 | 0.00 | C |
| ATOM 10529 | O SER D 902   | 91.863 | 68.108 | 78.493 | 1.00 | 0.00 | O |
| ATOM 10530 | CB SER D 902  | 94.689 | 68.580 | 80.013 | 1.00 | 0.00 | C |
| ATOM 10531 | OG SER D 902  | 94.228 | 68.701 | 81.353 | 1.00 | 0.00 | O |
| ATOM 10532 | N VAL D 903   | 91.718 | 69.443 | 80.305 | 1.00 | 0.00 | N |
| ATOM 10533 | CA VAL D 903  | 90.378 | 69.042 | 80.607 | 1.00 | 0.00 | C |
| ATOM 10534 | C VAL D 903   | 89.513 | 69.434 | 79.457 | 1.00 | 0.00 | C |
| ATOM 10535 | O VAL D 903   | 88.576 | 68.720 | 79.107 | 1.00 | 0.00 | O |
| ATOM 10536 | CB VAL D 903  | 89.827 | 69.705 | 81.834 | 1.00 | 0.00 | C |
| ATOM 10537 | CG1 VAL D 903 | 88.333 | 69.356 | 81.952 | 1.00 | 0.00 | C |
| ATOM 10538 | CG2 VAL D 903 | 90.661 | 69.257 | 83.044 | 1.00 | 0.00 | C |
| ATOM 10539 | N ILE D 904   | 89.804 | 70.595 | 78.841 | 1.00 | 0.00 | N |
| ATOM 10540 | CA ILE D 904  | 88.983 | 71.065 | 77.767 | 1.00 | 0.00 | C |
| ATOM 10541 | C ILE D 904   | 89.082 | 70.083 | 76.646 | 1.00 | 0.00 | C |
| ATOM 10542 | O ILE D 904   | 88.086 | 69.726 | 76.021 | 1.00 | 0.00 | O |
| ATOM 10543 | CB ILE D 904  | 89.535 | 72.273 | 77.071 | 1.00 | 0.00 | C |
| ATOM 10544 | CG1 ILE D 904 | 90.025 | 73.366 | 78.015 | 1.00 | 0.00 | C |
| ATOM 10545 | CG2 ILE D 904 | 88.430 | 72.781 | 76.134 | 1.00 | 0.00 | C |
| ATOM 10546 | CD1 ILE D 904 | 91.002 | 74.298 | 77.299 | 1.00 | 0.00 | C |
| ATOM 10547 | N TYR D 905   | 90.325 | 69.698 | 76.297 | 1.00 | 0.00 | N |
| ATOM 10548 | CA TYR D 905  | 90.523 | 68.858 | 75.153 | 1.00 | 0.00 | C |
| ATOM 10549 | C TYR D 905   | 90.121 | 67.420 | 75.311 | 1.00 | 0.00 | C |
| ATOM 10550 | O TYR D 905   | 89.276 | 66.927 | 74.566 | 1.00 | 0.00 | O |
| ATOM 10551 | CB TYR D 905  | 91.984 | 68.860 | 74.675 | 1.00 | 0.00 | C |
| ATOM 10552 | CG TYR D 905  | 92.248 | 70.193 | 74.067 | 1.00 | 0.00 | C |
| ATOM 10553 | CD1 TYR D 905 | 92.474 | 71.299 | 74.850 | 1.00 | 0.00 | C |

|            |               |        |        |        |      |      |   |
|------------|---------------|--------|--------|--------|------|------|---|
| ATOM 10554 | CD2 TYR D 905 | 92.271 | 70.326 | 72.696 | 1.00 | 0.00 | C |
| ATOM 10555 | CE1 TYR D 905 | 92.711 | 72.525 | 74.270 | 1.00 | 0.00 | C |
| ATOM 10556 | CE2 TYR D 905 | 92.510 | 71.546 | 72.116 | 1.00 | 0.00 | C |
| ATOM 10557 | CZ TYR D 905  | 92.731 | 72.649 | 72.903 | 1.00 | 0.00 | C |
| ATOM 10558 | OH TYR D 905  | 92.974 | 73.905 | 72.308 | 1.00 | 0.00 | O |
| ATOM 10559 | N GLU D 906   | 90.672 | 66.713 | 76.314 | 1.00 | 0.00 | N |
| ATOM 10560 | CA GLU D 906  | 90.524 | 65.282 | 76.287 | 1.00 | 0.00 | C |
| ATOM 10561 | C GLU D 906   | 89.126 | 64.799 | 76.504 | 1.00 | 0.00 | C |
| ATOM 10562 | O GLU D 906   | 88.645 | 63.988 | 75.715 | 1.00 | 0.00 | O |
| ATOM 10563 | CB GLU D 906  | 91.452 | 64.548 | 77.271 | 1.00 | 0.00 | C |
| ATOM 10564 | CG GLU D 906  | 91.425 | 63.033 | 77.076 | 1.00 | 0.00 | C |
| ATOM 10565 | CD GLU D 906  | 91.990 | 62.746 | 75.692 | 1.00 | 0.00 | C |
| ATOM 10566 | OE1 GLU D 906 | 93.057 | 63.329 | 75.360 | 1.00 | 0.00 | O |
| ATOM 10567 | OE2 GLU D 906 | 91.360 | 61.950 | 74.947 | 1.00 | 0.00 | O |
| ATOM 10568 | N PRO D 907   | 88.429 | 65.234 | 77.512 | 1.00 | 0.00 | N |
| ATOM 10569 | CA PRO D 907  | 87.111 | 64.698 | 77.690 | 1.00 | 0.00 | C |
| ATOM 10570 | C PRO D 907   | 86.191 | 65.157 | 76.612 | 1.00 | 0.00 | C |
| ATOM 10571 | O PRO D 907   | 85.243 | 64.442 | 76.292 | 1.00 | 0.00 | O |
| ATOM 10572 | CB PRO D 907  | 86.685 | 65.101 | 79.100 | 1.00 | 0.00 | C |
| ATOM 10573 | CG PRO D 907  | 88.019 | 65.197 | 79.860 | 1.00 | 0.00 | C |
| ATOM 10574 | CD PRO D 907  | 89.047 | 65.581 | 78.785 | 1.00 | 0.00 | C |
| ATOM 10575 | N TYR D 908   | 86.438 | 66.359 | 76.067 | 1.00 | 0.00 | N |
| ATOM 10576 | CA TYR D 908  | 85.594 | 66.909 | 75.050 | 1.00 | 0.00 | C |
| ATOM 10577 | C TYR D 908   | 85.704 | 66.149 | 73.776 | 1.00 | 0.00 | C |
| ATOM 10578 | O TYR D 908   | 84.706 | 65.958 | 73.082 | 1.00 | 0.00 | O |
| ATOM 10579 | CB TYR D 908  | 85.783 | 68.421 | 74.844 | 1.00 | 0.00 | C |
| ATOM 10580 | CG TYR D 908  | 85.045 | 69.035 | 75.992 | 1.00 | 0.00 | C |
| ATOM 10581 | CD1 TYR D 908 | 83.711 | 69.346 | 75.861 | 1.00 | 0.00 | C |
| ATOM 10582 | CD2 TYR D 908 | 85.659 | 69.275 | 77.199 | 1.00 | 0.00 | C |
| ATOM 10583 | CE1 TYR D 908 | 83.009 | 69.903 | 76.903 | 1.00 | 0.00 | C |
| ATOM 10584 | CE2 TYR D 908 | 84.968 | 69.833 | 78.247 | 1.00 | 0.00 | C |
| ATOM 10585 | CZ TYR D 908  | 83.640 | 70.149 | 78.099 | 1.00 | 0.00 | C |
| ATOM 10586 | OH TYR D 908  | 82.922 | 70.722 | 79.170 | 1.00 | 0.00 | O |
| ATOM 10587 | N LEU D 909   | 86.914 | 65.716 | 73.383 | 1.00 | 0.00 | N |
| ATOM 10588 | CA LEU D 909  | 86.920 | 64.915 | 72.197 | 1.00 | 0.00 | C |
| ATOM 10589 | C LEU D 909   | 86.170 | 63.655 | 72.504 | 1.00 | 0.00 | C |
| ATOM 10590 | O LEU D 909   | 85.388 | 63.173 | 71.687 | 1.00 | 0.00 | O |
| ATOM 10591 | CB LEU D 909  | 88.325 | 64.527 | 71.696 | 1.00 | 0.00 | C |
| ATOM 10592 | CG LEU D 909  | 89.064 | 65.654 | 70.947 | 1.00 | 0.00 | C |
| ATOM 10593 | CD1 LEU D 909 | 88.328 | 66.013 | 69.646 | 1.00 | 0.00 | C |
| ATOM 10594 | CD2 LEU D 909 | 89.325 | 66.880 | 71.830 | 1.00 | 0.00 | C |
| ATOM 10595 | N ALA D 910   | 86.395 | 63.097 | 73.711 | 1.00 | 0.00 | N |
| ATOM 10596 | CA ALA D 910  | 85.826 | 61.836 | 74.092 | 1.00 | 0.00 | C |
| ATOM 10597 | C ALA D 910   | 84.324 | 61.847 | 74.198 | 1.00 | 0.00 | C |

|            |     |           |        |        |        |      |      |   |
|------------|-----|-----------|--------|--------|--------|------|------|---|
| ATOM 10598 | O   | ALA D 910 | 83.667 | 60.994 | 73.606 | 1.00 | 0.00 | O |
| ATOM 10599 | CB  | ALA D 910 | 86.374 | 61.341 | 75.442 | 1.00 | 0.00 | C |
| ATOM 10600 | N   | MET D 911 | 83.718 | 62.813 | 74.922 | 1.00 | 0.00 | N |
| ATOM 10601 | CA  | MET D 911 | 82.290 | 62.714 | 75.093 | 1.00 | 0.00 | C |
| ATOM 10602 | C   | MET D 911 | 81.769 | 64.053 | 75.476 | 1.00 | 0.00 | C |
| ATOM 10603 | O   | MET D 911 | 82.384 | 65.081 | 75.211 | 1.00 | 0.00 | O |
| ATOM 10604 | CB  | MET D 911 | 81.834 | 61.792 | 76.239 | 1.00 | 0.00 | C |
| ATOM 10605 | CG  | MET D 911 | 82.184 | 60.310 | 76.098 | 1.00 | 0.00 | C |
| ATOM 10606 | SD  | MET D 911 | 83.897 | 59.876 | 76.518 | 1.00 | 0.00 | S |
| ATOM 10607 | CE  | MET D 911 | 83.580 | 58.091 | 76.599 | 1.00 | 0.00 | C |
| ATOM 10608 | N   | PHE D 912 | 80.562 | 64.076 | 76.077 | 1.00 | 0.00 | N |
| ATOM 10609 | CA  | PHE D 912 | 80.076 | 65.350 | 76.498 | 1.00 | 0.00 | C |
| ATOM 10610 | C   | PHE D 912 | 79.431 | 65.173 | 77.832 | 1.00 | 0.00 | C |
| ATOM 10611 | O   | PHE D 912 | 78.519 | 64.360 | 77.979 | 1.00 | 0.00 | O |
| ATOM 10612 | CB  | PHE D 912 | 79.063 | 65.931 | 75.503 | 1.00 | 0.00 | C |
| ATOM 10613 | CG  | PHE D 912 | 79.817 | 65.991 | 74.218 | 1.00 | 0.00 | C |
| ATOM 10614 | CD1 | PHE D 912 | 79.858 | 64.891 | 73.389 | 1.00 | 0.00 | C |
| ATOM 10615 | CD2 | PHE D 912 | 80.503 | 67.124 | 73.849 | 1.00 | 0.00 | C |
| ATOM 10616 | CE1 | PHE D 912 | 80.557 | 64.923 | 72.208 | 1.00 | 0.00 | C |
| ATOM 10617 | CE2 | PHE D 912 | 81.203 | 67.162 | 72.667 | 1.00 | 0.00 | C |
| ATOM 10618 | CZ  | PHE D 912 | 81.230 | 66.063 | 71.846 | 1.00 | 0.00 | C |
| ATOM 10619 | N   | GLY D 913 | 79.891 | 65.921 | 78.860 | 1.00 | 0.00 | N |
| ATOM 10620 | CA  | GLY D 913 | 81.018 | 66.813 | 78.792 | 1.00 | 0.00 | C |
| ATOM 10621 | C   | GLY D 913 | 82.010 | 66.391 | 79.843 | 1.00 | 0.00 | C |
| ATOM 10622 | O   | GLY D 913 | 82.279 | 65.207 | 80.038 | 1.00 | 0.00 | O |
| ATOM 10623 | N   | GLN D 914 | 82.590 | 67.385 | 80.552 | 1.00 | 0.00 | N |
| ATOM 10624 | CA  | GLN D 914 | 83.531 | 67.145 | 81.614 | 1.00 | 0.00 | C |
| ATOM 10625 | C   | GLN D 914 | 82.746 | 66.810 | 82.840 | 1.00 | 0.00 | C |
| ATOM 10626 | O   | GLN D 914 | 81.524 | 66.959 | 82.841 | 1.00 | 0.00 | O |
| ATOM 10627 | CB  | GLN D 914 | 84.412 | 68.369 | 81.927 | 1.00 | 0.00 | C |
| ATOM 10628 | CG  | GLN D 914 | 85.335 | 68.196 | 83.132 | 1.00 | 0.00 | C |
| ATOM 10629 | CD  | GLN D 914 | 86.287 | 67.046 | 82.854 | 1.00 | 0.00 | C |
| ATOM 10630 | NE2 | GLN D 914 | 87.062 | 66.639 | 83.895 | 1.00 | 0.00 | N |
| ATOM 10631 | OE1 | GLN D 914 | 86.339 | 66.520 | 81.743 | 1.00 | 0.00 | O |
| ATOM 10632 | N   | VAL D 915 | 83.419 | 66.265 | 83.882 | 1.00 | 0.00 | N |
| ATOM 10633 | CA  | VAL D 915 | 82.771 | 65.996 | 85.136 | 1.00 | 0.00 | C |
| ATOM 10634 | C   | VAL D 915 | 83.537 | 66.656 | 86.253 | 1.00 | 0.00 | C |
| ATOM 10635 | O   | VAL D 915 | 84.510 | 66.121 | 86.775 | 1.00 | 0.00 | O |
| ATOM 10636 | CB  | VAL D 915 | 82.657 | 64.527 | 85.440 | 1.00 | 0.00 | C |
| ATOM 10637 | CG1 | VAL D 915 | 81.609 | 63.913 | 84.499 | 1.00 | 0.00 | C |
| ATOM 10638 | CG2 | VAL D 915 | 84.040 | 63.882 | 85.267 | 1.00 | 0.00 | C |
| ATOM 10639 | N   | PRO D 916 | 83.134 | 68.772 | 85.471 | 1.00 | 0.00 | N |
| ATOM 10640 | CA  | PRO D 916 | 83.824 | 69.383 | 86.577 | 1.00 | 0.00 | C |
| ATOM 10641 | C   | PRO D 916 | 83.380 | 68.719 | 87.838 | 1.00 | 0.00 | C |



|            |     |           |        |        |         |      |      |   |
|------------|-----|-----------|--------|--------|---------|------|------|---|
| ATOM 10642 | O   | PRO D 916 | 82.291 | 68.150 | 87.861  | 1.00 | 0.00 | O |
| ATOM 10643 | CB  | PRO D 916 | 83.489 | 70.869 | 86.511  | 1.00 | 0.00 | C |
| ATOM 10644 | CG  | PRO D 916 | 83.228 | 71.114 | 85.014  | 1.00 | 0.00 | C |
| ATOM 10645 | CD  | PRO D 916 | 82.703 | 69.760 | 84.496  | 1.00 | 0.00 | C |
| ATOM 10646 | N   | SER D 917 | 84.204 | 68.771 | 88.896  | 1.00 | 0.00 | N |
| ATOM 10647 | CA  | SER D 917 | 83.775 | 68.154 | 90.113  | 1.00 | 0.00 | C |
| ATOM 10648 | C   | SER D 917 | 82.604 | 68.945 | 90.584  | 1.00 | 0.00 | C |
| ATOM 10649 | O   | SER D 917 | 82.373 | 70.064 | 90.126  | 1.00 | 0.00 | O |
| ATOM 10650 | CB  | SER D 917 | 84.836 | 68.166 | 91.226  | 1.00 | 0.00 | C |
| ATOM 10651 | OG  | SER D 917 | 85.946 | 67.370 | 90.841  | 1.00 | 0.00 | O |
| ATOM 10652 | N   | ASP D 918 | 81.837 | 68.382 | 91.534  | 1.00 | 0.00 | N |
| ATOM 10653 | CA  | ASP D 918 | 80.626 | 69.019 | 91.969  | 1.00 | 0.00 | C |
| ATOM 10654 | C   | ASP D 918 | 80.929 | 70.399 | 92.446  | 1.00 | 0.00 | C |
| ATOM 10655 | O   | ASP D 918 | 82.007 | 70.687 | 92.961  | 1.00 | 0.00 | O |
| ATOM 10656 | CB  | ASP D 918 | 79.898 | 68.267 | 93.096  | 1.00 | 0.00 | C |
| ATOM 10657 | CG  | ASP D 918 | 79.268 | 67.018 | 92.498  | 1.00 | 0.00 | C |
| ATOM 10658 | OD1 | ASP D 918 | 79.247 | 66.904 | 91.245  | 1.00 | 0.00 | O |
| ATOM 10659 | OD2 | ASP D 918 | 78.797 | 66.159 | 93.288  | 1.00 | 0.00 | O |
| ATOM 10660 | N   | VAL D 919 | 79.942 | 71.300 | 92.263  | 1.00 | 0.00 | N |
| ATOM 10661 | CA  | VAL D 919 | 80.117 | 72.679 | 92.597  | 1.00 | 0.00 | C |
| ATOM 10662 | C   | VAL D 919 | 79.927 | 72.851 | 94.063  | 1.00 | 0.00 | C |
| ATOM 10663 | O   | VAL D 919 | 78.846 | 72.635 | 94.609  | 1.00 | 0.00 | O |
| ATOM 10664 | CB  | VAL D 919 | 79.167 | 73.581 | 91.859  | 1.00 | 0.00 | C |
| ATOM 10665 | CG1 | VAL D 919 | 77.721 | 73.147 | 92.161  | 1.00 | 0.00 | C |
| ATOM 10666 | CG2 | VAL D 919 | 79.475 | 75.033 | 92.249  | 1.00 | 0.00 | C |
| ATOM 10667 | N   | ASP D 920 | 81.016 | 73.250 | 94.741  | 1.00 | 0.00 | N |
| ATOM 10668 | CA  | ASP D 920 | 80.938 | 73.483 | 96.148  | 1.00 | 0.00 | C |
| ATOM 10669 | C   | ASP D 920 | 80.555 | 74.907 | 96.301  | 1.00 | 0.00 | C |
| ATOM 10670 | O   | ASP D 920 | 81.389 | 75.805 | 96.187  | 1.00 | 0.00 | O |
| ATOM 10671 | CB  | ASP D 920 | 82.278 | 73.311 | 96.881  | 1.00 | 0.00 | C |
| ATOM 10672 | CG  | ASP D 920 | 82.032 | 73.590 | 98.356  | 1.00 | 0.00 | C |
| ATOM 10673 | OD1 | ASP D 920 | 80.838 | 73.616 | 98.760  | 1.00 | 0.00 | O |
| ATOM 10674 | OD2 | ASP D 920 | 83.030 | 73.789 | 99.096  | 1.00 | 0.00 | O |
| ATOM 10675 | N   | GLY D 921 | 79.264 | 75.159 | 96.555  | 1.00 | 0.00 | N |
| ATOM 10676 | CA  | GLY D 921 | 78.898 | 76.520 | 96.738  | 1.00 | 0.00 | C |
| ATOM 10677 | C   | GLY D 921 | 79.488 | 76.874 | 98.053  | 1.00 | 0.00 | C |
| ATOM 10678 | O   | GLY D 921 | 79.983 | 76.012 | 98.776  | 1.00 | 0.00 | O |
| ATOM 10679 | N   | THR D 922 | 79.493 | 78.167 | 98.392  | 1.00 | 0.00 | N |
| ATOM 10680 | CA  | THR D 922 | 79.978 | 78.509 | 99.687  | 1.00 | 0.00 | C |
| ATOM 10681 | C   | THR D 922 | 78.980 | 77.915 | 100.622 | 1.00 | 0.00 | C |
| ATOM 10682 | O   | THR D 922 | 79.296 | 77.552 | 101.754 | 1.00 | 0.00 | O |
| ATOM 10683 | CB  | THR D 922 | 80.029 | 79.985 | 99.934  | 1.00 | 0.00 | C |
| ATOM 10684 | CG2 | THR D 922 | 78.595 | 80.537 | 99.977  | 1.00 | 0.00 | C |
| ATOM 10685 | OG1 | THR D 922 | 80.698 | 80.252 | 101.158 | 1.00 | 0.00 | O |

|             |     |           |        |        |         |      |      |   |
|-------------|-----|-----------|--------|--------|---------|------|------|---|
| ATOM 10686  | N   | THR D 923 | 77.731 | 77.809 | 100.130 | 1.00 | 0.00 | N |
| ATOM 10687  | CA  | THR D 923 | 76.592 | 77.359 | 100.872 | 1.00 | 0.00 | C |
| ATOM 10688  | C   | THR D 923 | 76.712 | 75.894 | 101.145 | 1.00 | 0.00 | C |
| ATOM 10689  | O   | THR D 923 | 77.445 | 75.174 | 100.469 | 1.00 | 0.00 | O |
| ATOM 10690  | CB  | THR D 923 | 75.318 | 77.583 | 100.111 | 1.00 | 0.00 | C |
| ATOM 10691  | CG2 | THR D 923 | 74.116 | 77.167 | 100.977 | 1.00 | 0.00 | C |
| ATOM 10692  | OG1 | THR D 923 | 75.205 | 78.953 | 99.768  | 1.00 | 0.00 | O |
| ATOM 10693  | N   | TYR D 924 | 75.978 | 75.423 | 102.173 | 1.00 | 0.00 | N |
| ATOM 10694  | CA  | TYR D 924 | 75.995 | 74.036 | 102.522 | 1.00 | 0.00 | C |
| ATOM 10695  | C   | TYR D 924 | 74.687 | 73.488 | 102.065 | 1.00 | 0.00 | C |
| ATOM 10696  | O   | TYR D 924 | 73.623 | 73.940 | 102.486 | 1.00 | 0.00 | O |
| ATOM 10697  | CB  | TYR D 924 | 76.080 | 73.781 | 104.040 | 1.00 | 0.00 | C |
| ATOM 10698  | CG  | TYR D 924 | 77.360 | 74.361 | 104.533 | 1.00 | 0.00 | C |
| ATOM 10699  | CD1 | TYR D 924 | 77.434 | 75.697 | 104.855 | 1.00 | 0.00 | C |
| ATOM 10700  | CD2 | TYR D 924 | 78.482 | 73.578 | 104.679 | 1.00 | 0.00 | C |
| ATOM 10701  | CE1 | TYR D 924 | 78.608 | 76.244 | 105.314 | 1.00 | 0.00 | C |
| ATOM 10702  | CE2 | TYR D 924 | 79.660 | 74.120 | 105.138 | 1.00 | 0.00 | C |
| ATOM 10703  | CZ  | TYR D 924 | 79.726 | 75.455 | 105.455 | 1.00 | 0.00 | C |
| ATOM 10704  | OH  | TYR D 924 | 80.932 | 76.015 | 105.926 | 1.00 | 0.00 | O |
| ATOM 10705  | N   | ASP D 925 | 74.758 | 72.507 | 101.153 | 1.00 | 0.00 | N |
| ATOM 10706  | CA  | ASP D 925 | 73.596 | 71.900 | 100.595 | 1.00 | 0.00 | C |
| ATOM 10707  | C   | ASP D 925 | 73.103 | 70.915 | 101.599 | 1.00 | 0.00 | C |
| ATOM 10708  | O   | ASP D 925 | 73.804 | 70.588 | 102.556 | 1.00 | 0.00 | O |
| ATOM 10709  | CB  | ASP D 925 | 73.925 | 71.119 | 99.310  | 1.00 | 0.00 | C |
| ATOM 10710  | CG  | ASP D 925 | 72.650 | 70.658 | 98.627  | 1.00 | 0.00 | C |
| ATOM 10711  | OD1 | ASP D 925 | 71.567 | 71.219 | 98.937  | 1.00 | 0.00 | O |
| ATOM 10712  | OD2 | ASP D 925 | 72.741 | 69.735 | 97.777  | 1.00 | 0.00 | O |
| ATOM 10713  | N   | PHE D 926 | 71.855 | 70.453 | 101.419 | 1.00 | 0.00 | N |
| ATOM 10714  | CA  | PHE D 926 | 71.367 | 69.415 | 102.260 | 1.00 | 0.00 | C |
| ATOM 10715  | C   | PHE D 926 | 71.951 | 68.179 | 101.677 | 1.00 | 0.00 | C |
| ATOM 10716  | O   | PHE D 926 | 72.215 | 68.117 | 100.478 | 1.00 | 0.00 | O |
| ATOM 10717  | CB  | PHE D 926 | 69.831 | 69.311 | 102.302 | 1.00 | 0.00 | C |
| ATOM 10718  | CG  | PHE D 926 | 69.327 | 69.069 | 100.921 | 1.00 | 0.00 | C |
| ATOM 10719  | CD1 | PHE D 926 | 69.308 | 70.091 | 100.001 | 1.00 | 0.00 | C |
| ATOM 10720  | CD2 | PHE D 926 | 68.847 | 67.833 | 100.553 | 1.00 | 0.00 | C |
| ATOM 10721  | CE1 | PHE D 926 | 68.834 | 69.882 | 98.727  | 1.00 | 0.00 | C |
| ATOM 10722  | CE2 | PHE D 926 | 68.372 | 67.618 | 99.280  | 1.00 | 0.00 | C |
| ATOM 10723  | CZ  | PHE D 926 | 68.369 | 68.642 | 98.363  | 1.00 | 0.00 | C |
| ATOM 10724  | N   | ALA D 927 | 72.201 | 67.162 | 102.515 | 1.00 | 0.00 | N |
| ATOM 10725  | CA  | ALA D 927 | 72.836 | 65.990 | 102.002 | 1.00 | 0.00 | C |
| ATOM 10726  | C   | ALA D 927 | 71.937 | 65.388 | 100.979 | 1.00 | 0.00 | C |
| ATOM 10727  | O   | ALA D 927 | 70.721 | 65.569 | 101.010 | 1.00 | 0.00 | O |
| ATOM 10728  | CB  | ALA D 927 | 73.118 | 64.922 | 103.071 | 1.00 | 0.00 | C |
| HETATM10729 | N   | HIE D 928 | 72.532 | 64.677 | 100.011 | 1.00 | 0.00 | N |

|             |     |           |        |        |         |      |      |   |
|-------------|-----|-----------|--------|--------|---------|------|------|---|
| HETATM10730 | CA  | HIE D 928 | 71.706 | 64.091 | 99.013  | 1.00 | 0.00 | C |
| HETATM10731 | C   | HIE D 928 | 71.185 | 62.816 | 99.565  | 1.00 | 0.00 | C |
| HETATM10732 | O   | HIE D 928 | 71.889 | 62.096 | 100.273 | 1.00 | 0.00 | O |
| HETATM10733 | CB  | HIE D 928 | 72.434 | 63.791 | 97.691  | 1.00 | 0.00 | C |
| HETATM10734 | CG  | HIE D 928 | 71.489 | 63.323 | 96.632  | 1.00 | 0.00 | C |
| HETATM10735 | CD2 | HIE D 928 | 71.476 | 62.171 | 95.905  | 1.00 | 0.00 | C |
| HETATM10736 | ND1 | HIE D 928 | 70.410 | 64.056 | 96.200  | 1.00 | 0.00 | N |
| HETATM10737 | CE1 | HIE D 928 | 69.794 | 63.316 | 95.240  | 1.00 | 0.00 | C |
| HETATM10738 | NE2 | HIE D 928 | 70.406 | 62.167 | 95.025  | 1.00 | 0.00 | N |
| ATOM 10739  | N   | CYS D 929 | 69.910 | 62.506 | 99.272  | 1.00 | 0.00 | N |
| ATOM 10740  | CA  | CYS D 929 | 69.378 | 61.282 | 99.772  | 1.00 | 0.00 | C |
| ATOM 10741  | C   | CYS D 929 | 70.130 | 60.195 | 99.084  | 1.00 | 0.00 | C |
| ATOM 10742  | O   | CYS D 929 | 70.432 | 60.288 | 97.895  | 1.00 | 0.00 | O |
| ATOM 10743  | CB  | CYS D 929 | 67.867 | 61.114 | 99.520  | 1.00 | 0.00 | C |
| ATOM 10744  | SG  | CYS D 929 | 67.422 | 61.294 | 97.770  | 1.00 | 0.00 | S |
| ATOM 10745  | N   | THR D 930 | 70.465 | 59.131 | 99.832  | 1.00 | 0.00 | N |
| ATOM 10746  | CA  | THR D 930 | 71.291 | 58.099 | 99.284  | 1.00 | 0.00 | C |
| ATOM 10747  | C   | THR D 930 | 70.603 | 57.474 | 98.115  | 1.00 | 0.00 | C |
| ATOM 10748  | O   | THR D 930 | 71.214 | 57.300 | 97.061  | 1.00 | 0.00 | O |
| ATOM 10749  | CB  | THR D 930 | 71.640 | 57.030 | 100.281 | 1.00 | 0.00 | C |
| ATOM 10750  | CG2 | THR D 930 | 70.364 | 56.296 | 100.731 | 1.00 | 0.00 | C |
| ATOM 10751  | OG1 | THR D 930 | 72.565 | 56.119 | 99.710  | 1.00 | 0.00 | O |
| ATOM 10752  | N   | PHE D 931 | 69.308 | 57.138 | 98.250  | 1.00 | 0.00 | N |
| ATOM 10753  | CA  | PHE D 931 | 68.641 | 56.547 | 97.134  | 1.00 | 0.00 | C |
| ATOM 10754  | C   | PHE D 931 | 68.408 | 57.662 | 96.176  | 1.00 | 0.00 | C |
| ATOM 10755  | O   | PHE D 931 | 68.190 | 58.801 | 96.586  | 1.00 | 0.00 | O |
| ATOM 10756  | CB  | PHE D 931 | 67.290 | 55.914 | 97.506  | 1.00 | 0.00 | C |
| ATOM 10757  | CG  | PHE D 931 | 67.599 | 54.838 | 98.488  | 1.00 | 0.00 | C |
| ATOM 10758  | CD1 | PHE D 931 | 67.765 | 55.141 | 99.818  | 1.00 | 0.00 | C |
| ATOM 10759  | CD2 | PHE D 931 | 67.731 | 53.528 | 98.083  | 1.00 | 0.00 | C |
| ATOM 10760  | CE1 | PHE D 931 | 68.058 | 54.156 | 100.736 | 1.00 | 0.00 | C |
| ATOM 10761  | CE2 | PHE D 931 | 68.022 | 52.541 | 98.997  | 1.00 | 0.00 | C |
| ATOM 10762  | CZ  | PHE D 931 | 68.184 | 52.852 | 100.324 | 1.00 | 0.00 | C |
| ATOM 10763  | N   | THR D 932 | 68.478 | 57.377 | 94.866  | 1.00 | 0.00 | N |
| ATOM 10764  | CA  | THR D 932 | 68.294 | 58.436 | 93.919  | 1.00 | 0.00 | C |
| ATOM 10765  | C   | THR D 932 | 66.833 | 58.548 | 93.636  | 1.00 | 0.00 | C |
| ATOM 10766  | O   | THR D 932 | 66.014 | 57.920 | 94.308  | 1.00 | 0.00 | O |
| ATOM 10767  | CB  | THR D 932 | 69.016 | 58.214 | 92.620  | 1.00 | 0.00 | C |
| ATOM 10768  | CG2 | THR D 932 | 70.522 | 58.090 | 92.911  | 1.00 | 0.00 | C |
| ATOM 10769  | OG1 | THR D 932 | 68.540 | 57.043 | 91.979  | 1.00 | 0.00 | O |
| ATOM 10770  | N   | GLY D 933 | 66.472 | 59.393 | 92.653  | 1.00 | 0.00 | N |
| ATOM 10771  | CA  | GLY D 933 | 65.095 | 59.573 | 92.297  | 1.00 | 0.00 | C |
| ATOM 10772  | C   | GLY D 933 | 65.046 | 59.807 | 90.820  | 1.00 | 0.00 | C |
| ATOM 10773  | O   | GLY D 933 | 66.027 | 60.243 | 90.220  | 1.00 | 0.00 | O |

|            |     |           |        |        |        |      |      |     |
|------------|-----|-----------|--------|--------|--------|------|------|-----|
| ATOM 10774 | N   | ASND 934  | 63.885 | 59.517 | 90.195 | 1.00 | 0.00 | N   |
| ATOM 10775 | CA  | ASND 934  | 63.777 | 59.643 | 88.770 | 1.00 | 0.00 | C   |
| ATOM 10776 | C   | ASND 934  | 63.966 | 61.073 | 88.362 | 1.00 | 0.00 | C   |
| ATOM 10777 | O   | ASND 934  | 64.868 | 61.390 | 87.589 | 1.00 | 0.00 | O   |
| ATOM 10778 | CB  | ASND 934  | 62.398 | 59.199 | 88.247 | 1.00 | 0.00 | C   |
| ATOM 10779 | CG  | ASND 934  | 62.456 | 59.114 | 86.728 | 1.00 | 0.00 | C   |
| ATOM 10780 | ND2 | ASND 934  | 62.985 | 60.190 | 86.085 | 1.00 | 0.00 | N   |
| ATOM 10781 | OD1 | ASND 934  | 62.033 | 58.128 | 86.127 | 1.00 | 0.00 | O   |
| ATOM 10782 | N   | GLUD 935  | 63.146 | 61.993 | 88.904 | 1.00 | 0.00 | N   |
| ATOM 10783 | CA  | GLUD 935  | 63.294 | 63.356 | 88.489 | 1.00 | 0.00 | C   |
| ATOM 10784 | C   | GLUD 935  | 63.737 | 64.122 | 89.683 | 1.00 | 0.00 | C   |
| ATOM 10785 | O   | GLUD 935  | 63.426 | 63.754 | 90.815 | 1.00 | 0.00 | O   |
| ATOM 10786 | CB  | GLUD 935  | 62.002 | 64.008 | 87.977 | 1.00 | 0.00 | C   |
| ATOM 10787 | CG  | GLUD 935  | 62.244 | 65.418 | 87.428 | 1.00 | 0.00 | C   |
| ATOM 10788 | CD  | GLUD 935  | 60.916 | 65.966 | 86.929 | 1.00 | 0.00 | C   |
| ATOM 10789 | OE1 | GLUD 935  | 60.131 | 65.172 | 86.343 | 1.00 | 0.00 | O   |
| ATOM 10790 | OE2 | GLUD 935  | 60.670 | 67.183 | 87.127 | 1.00 | 0.00 | O   |
| ATOM 10791 | N   | SERD 936  | 64.502 | 65.204 | 89.459 | 1.00 | 0.00 | N   |
| ATOM 10792 | CA  | SERD 936  | 64.978 | 65.935 | 90.590 | 1.00 | 0.00 | C   |
| ATOM 10793 | C   | SERD 936  | 64.881 | 67.391 | 90.286 | 1.00 | 0.00 | C   |
| ATOM 10794 | O   | SERD 936  | 64.738 | 67.795 | 89.131 | 1.00 | 0.00 | O   |
| ATOM 10795 | CB  | SERD 936  | 66.449 | 65.631 | 90.919 | 1.00 | 0.00 | C   |
| ATOM 10796 | OG  | SERD 936  | 66.872 | 66.379 | 92.049 | 1.00 | 0.00 | O   |
| ATOM 10797 | N   | LYSD 937  | 64.906 | 68.224 | 91.346 | 1.00 | 0.00 | N   |
| ATOM 10798 | CA  | LYSD 937  | 64.903 | 69.639 | 91.129 | 1.00 | 0.00 | C   |
| ATOM 10799 | C   | LYSD 937  | 66.005 | 70.206 | 91.974 | 1.00 | 0.00 | C   |
| ATOM 10800 | O   | LYSD 937  | 65.853 | 70.457 | 93.167 | 1.00 | 0.00 | O   |
| ATOM 10801 | CB  | LYSD 937  | 63.582 | 70.310 | 91.536 | 1.00 | 0.00 | C   |
| ATOM 10802 | CG  | LYSD 937  | 62.405 | 69.866 | 90.664 | 1.00 | 0.00 | C   |
| ATOM 10803 | CD  | LYSD 937  | 62.595 | 70.173 | 89.178 | 1.00 | 0.00 | C   |
| ATOM 10804 | CE  | LYSD 937  | 61.417 | 69.739 | 88.300 | 1.00 | 0.00 | C   |
| ATOM 10805 | NZ  | LYSD 937  | 61.688 | 70.076 | 86.885 | 1.00 | 0.00 | N1+ |
| ATOM 10806 | N   | PRO D 938 | 67.124 | 70.403 | 91.341 | 1.00 | 0.00 | N   |
| ATOM 10807 | CA  | PRO D 938 | 68.288 | 70.954 | 91.983 | 1.00 | 0.00 | C   |
| ATOM 10808 | C   | PRO D 938 | 68.159 | 72.439 | 92.077 | 1.00 | 0.00 | C   |
| ATOM 10809 | O   | PRO D 938 | 67.142 | 72.978 | 91.653 | 1.00 | 0.00 | O   |
| ATOM 10810 | CB  | PRO D 938 | 69.494 | 70.501 | 91.152 | 1.00 | 0.00 | C   |
| ATOM 10811 | CG  | PRO D 938 | 68.893 | 69.997 | 89.832 | 1.00 | 0.00 | C   |
| ATOM 10812 | CD  | PRO D 938 | 67.483 | 69.538 | 90.229 | 1.00 | 0.00 | C   |
| ATOM 10813 | N   | LEUD 939  | 69.180 | 73.117 | 92.632 | 1.00 | 0.00 | N   |
| ATOM 10814 | CA  | LEUD 939  | 69.117 | 74.535 | 92.825 | 1.00 | 0.00 | C   |
| ATOM 10815 | C   | LEUD 939  | 69.065 | 75.218 | 91.500 | 1.00 | 0.00 | C   |
| ATOM 10816 | O   | LEUD 939  | 69.915 | 75.014 | 90.632 | 1.00 | 0.00 | O   |
| ATOM 10817 | CB  | LEUD 939  | 70.313 | 75.074 | 93.618 | 1.00 | 0.00 | C   |

|            |               |        |        |        |      |      |   |
|------------|---------------|--------|--------|--------|------|------|---|
| ATOM 10818 | CG LEU D 939  | 70.385 | 74.490 | 95.041 | 1.00 | 0.00 | C |
| ATOM 10819 | CD1 LEU D 939 | 70.646 | 72.974 | 95.034 | 1.00 | 0.00 | C |
| ATOM 10820 | CD2 LEU D 939 | 71.408 | 75.244 | 95.889 | 1.00 | 0.00 | C |
| ATOM 10821 | N CYS D 940   | 68.043 | 76.078 | 91.333 | 1.00 | 0.00 | N |
| ATOM 10822 | CA CYS D 940  | 67.880 | 76.750 | 90.085 | 1.00 | 0.00 | C |
| ATOM 10823 | C CYS D 940   | 69.010 | 77.661 | 89.917 | 1.00 | 0.00 | C |
| ATOM 10824 | O CYS D 940   | 69.350 | 78.469 | 90.777 | 1.00 | 0.00 | O |
| ATOM 10825 | CB CYS D 940  | 66.596 | 77.583 | 89.962 | 1.00 | 0.00 | C |
| ATOM 10826 | SG CYS D 940  | 65.120 | 76.539 | 89.827 | 1.00 | 0.00 | S |
| ATOM 10827 | N VAL D 941   | 69.636 | 77.535 | 88.757 | 1.00 | 0.00 | N |
| ATOM 10828 | CA VAL D 941  | 70.731 | 78.394 | 88.545 | 1.00 | 0.00 | C |
| ATOM 10829 | C VAL D 941   | 70.582 | 78.878 | 87.154 | 1.00 | 0.00 | C |
| ATOM 10830 | O VAL D 941   | 69.801 | 78.344 | 86.370 | 1.00 | 0.00 | O |
| ATOM 10831 | CB VAL D 941  | 72.036 | 77.684 | 88.691 | 1.00 | 0.00 | C |
| ATOM 10832 | CG1 VAL D 941 | 72.128 | 77.168 | 90.139 | 1.00 | 0.00 | C |
| ATOM 10833 | CG2 VAL D 941 | 72.105 | 76.569 | 87.636 | 1.00 | 0.00 | C |
| ATOM 10834 | N GLU D 942   | 71.274 | 79.979 | 86.840 | 1.00 | 0.00 | N |
| ATOM 10835 | CA GLU D 942  | 71.225 | 80.467 | 85.505 | 1.00 | 0.00 | C |
| ATOM 10836 | C GLU D 942   | 71.972 | 79.504 | 84.630 | 1.00 | 0.00 | C |
| ATOM 10837 | O GLU D 942   | 71.611 | 79.301 | 83.472 | 1.00 | 0.00 | O |
| ATOM 10838 | CB GLU D 942  | 71.863 | 81.855 | 85.340 | 1.00 | 0.00 | C |
| ATOM 10839 | CG GLU D 942  | 71.792 | 82.372 | 83.905 | 1.00 | 0.00 | C |
| ATOM 10840 | CD GLU D 942  | 72.298 | 83.810 | 83.892 | 1.00 | 0.00 | C |
| ATOM 10841 | OE1 GLU D 942 | 72.466 | 84.386 | 84.997 | 1.00 | 0.00 | O |
| ATOM 10842 | OE2 GLU D 942 | 72.519 | 84.345 | 82.772 | 1.00 | 0.00 | O |
| ATOM 10843 | N LEU D 943   | 73.049 | 78.896 | 85.180 | 1.00 | 0.00 | N |
| ATOM 10844 | CA LEU D 943  | 73.944 | 78.024 | 84.454 | 1.00 | 0.00 | C |
| ATOM 10845 | C LEU D 943   | 73.459 | 76.595 | 84.428 | 1.00 | 0.00 | C |
| ATOM 10846 | O LEU D 943   | 72.373 | 76.298 | 84.919 | 1.00 | 0.00 | O |
| ATOM 10847 | CB LEU D 943  | 75.386 | 78.062 | 84.983 | 1.00 | 0.00 | C |
| ATOM 10848 | CG LEU D 943  | 76.054 | 79.425 | 84.730 | 1.00 | 0.00 | C |
| ATOM 10849 | CD1 LEU D 943 | 75.322 | 80.551 | 85.472 | 1.00 | 0.00 | C |
| ATOM 10850 | CD2 LEU D 943 | 77.558 | 79.382 | 85.042 | 1.00 | 0.00 | C |
| ATOM 10851 | N ASP D 944   | 74.245 | 75.684 | 83.785 | 1.00 | 0.00 | N |
| ATOM 10852 | CA ASP D 944  | 73.895 | 74.290 | 83.573 | 1.00 | 0.00 | C |
| ATOM 10853 | C ASP D 944   | 74.736 | 73.332 | 84.411 | 1.00 | 0.00 | C |
| ATOM 10854 | O ASP D 944   | 75.415 | 73.759 | 85.345 | 1.00 | 0.00 | O |
| ATOM 10855 | CB ASP D 944  | 74.053 | 73.863 | 82.106 | 1.00 | 0.00 | C |
| ATOM 10856 | CG ASP D 944  | 73.031 | 74.641 | 81.289 | 1.00 | 0.00 | C |
| ATOM 10857 | OD1 ASP D 944 | 71.851 | 74.724 | 81.728 | 1.00 | 0.00 | O |
| ATOM 10858 | OD2 ASP D 944 | 73.416 | 75.161 | 80.206 | 1.00 | 0.00 | O |
| ATOM 10859 | N GLU D 945   | 74.664 | 71.993 | 84.115 | 1.00 | 0.00 | N |
| ATOM 10860 | CA GLU D 945  | 75.415 | 70.967 | 84.822 | 1.00 | 0.00 | C |
| ATOM 10861 | C GLU D 945   | 75.111 | 69.594 | 84.236 | 1.00 | 0.00 | C |

|                           |        |        |        |      |      |   |
|---------------------------|--------|--------|--------|------|------|---|
| ATOM 10862 O GLU D 945    | 74.574 | 69.490 | 83.136 | 1.00 | 0.00 | O |
| ATOM 10863 CB GLU D 945   | 75.120 | 70.941 | 86.332 | 1.00 | 0.00 | C |
| ATOM 10864 CG GLU D 945   | 76.136 | 70.133 | 87.139 | 1.00 | 0.00 | C |
| ATOM 10865 CD GLU D 945   | 75.769 | 70.247 | 88.610 | 1.00 | 0.00 | C |
| ATOM 10866 OE1 GLU D 945  | 74.776 | 70.961 | 88.918 | 1.00 | 0.00 | O |
| ATOM 10867 OE2 GLU D 945  | 76.476 | 69.629 | 89.449 | 1.00 | 0.00 | O |
| HETATM10868 N HIE D 946   | 75.495 | 68.479 | 84.925 | 1.00 | 0.00 | N |
| HETATM10869 CA HIE D 946  | 75.206 | 67.164 | 84.395 | 1.00 | 0.00 | C |
| HETATM10870 C HIE D 946   | 74.568 | 66.324 | 85.461 | 1.00 | 0.00 | C |
| HETATM10871 O HIE D 946   | 74.907 | 66.424 | 86.638 | 1.00 | 0.00 | O |
| HETATM10872 CB HIE D 946  | 76.441 | 66.396 | 83.901 | 1.00 | 0.00 | C |
| HETATM10873 CG HIE D 946  | 77.289 | 65.875 | 85.018 | 1.00 | 0.00 | C |
| HETATM10874 CD2 HIE D 946 | 77.377 | 64.615 | 85.533 | 1.00 | 0.00 | C |
| HETATM10875 ND1 HIE D 946 | 78.167 | 66.640 | 85.745 | 1.00 | 0.00 | N |
| HETATM10876 CE1 HIE D 946 | 78.744 | 65.817 | 86.660 | 1.00 | 0.00 | C |
| HETATM10877 NE2 HIE D 946 | 78.296 | 64.579 | 86.567 | 1.00 | 0.00 | N |
| ATOM 10878 N ASN D 947    | 73.611 | 65.457 | 85.063 | 1.00 | 0.00 | N |
| ATOM 10879 CA ASN D 947   | 72.928 | 64.633 | 86.022 | 1.00 | 0.00 | C |
| ATOM 10880 C ASN D 947    | 72.605 | 63.322 | 85.385 | 1.00 | 0.00 | C |
| ATOM 10881 O ASN D 947    | 73.091 | 62.985 | 84.309 | 1.00 | 0.00 | O |
| ATOM 10882 CB ASN D 947   | 71.590 | 65.226 | 86.503 | 1.00 | 0.00 | C |
| ATOM 10883 CG ASN D 947   | 71.881 | 66.458 | 87.350 | 1.00 | 0.00 | C |
| ATOM 10884 ND2 ASN D 947  | 71.076 | 67.537 | 87.146 | 1.00 | 0.00 | N |
| ATOM 10885 OD1 ASN D 947  | 72.796 | 66.466 | 88.168 | 1.00 | 0.00 | O |
| ATOM 10886 N LEU D 948    | 71.780 | 62.532 | 86.094 | 1.00 | 0.00 | N |
| ATOM 10887 CA LEU D 948   | 71.321 | 61.250 | 85.648 | 1.00 | 0.00 | C |
| ATOM 10888 C LEU D 948    | 70.481 | 61.456 | 84.417 | 1.00 | 0.00 | C |
| ATOM 10889 O LEU D 948    | 70.579 | 60.663 | 83.477 | 1.00 | 0.00 | O |
| ATOM 10890 CB LEU D 948   | 70.426 | 60.565 | 86.695 | 1.00 | 0.00 | C |
| ATOM 10891 CG LEU D 948   | 71.102 | 60.363 | 88.062 | 1.00 | 0.00 | C |
| ATOM 10892 CD1 LEU D 948  | 70.145 | 59.676 | 89.040 | 1.00 | 0.00 | C |
| ATOM 10893 CD2 LEU D 948  | 72.436 | 59.610 | 87.935 | 1.00 | 0.00 | C |
| ATOM 10894 N PRO D 949    | 69.659 | 62.481 | 84.367 | 1.00 | 0.00 | N |
| ATOM 10895 CA PRO D 949   | 68.849 | 62.672 | 83.194 | 1.00 | 0.00 | C |
| ATOM 10896 C PRO D 949    | 69.673 | 63.092 | 82.028 | 1.00 | 0.00 | C |
| ATOM 10897 O PRO D 949    | 70.788 | 63.576 | 82.225 | 1.00 | 0.00 | O |
| ATOM 10898 CB PRO D 949   | 67.777 | 63.689 | 83.579 | 1.00 | 0.00 | C |
| ATOM 10899 CG PRO D 949   | 67.595 | 63.463 | 85.089 | 1.00 | 0.00 | C |
| ATOM 10900 CD PRO D 949   | 68.970 | 62.959 | 85.561 | 1.00 | 0.00 | C |
| ATOM 10901 N ARG D 950    | 69.144 | 62.896 | 80.803 | 1.00 | 0.00 | N |
| ATOM 10902 CA ARG D 950   | 69.875 | 63.236 | 79.624 | 1.00 | 0.00 | C |
| ATOM 10903 C ARG D 950    | 69.428 | 64.583 | 79.150 | 1.00 | 0.00 | C |
| ATOM 10904 O ARG D 950    | 68.482 | 64.708 | 78.372 | 1.00 | 0.00 | O |
| ATOM 10905 CB ARG D 950   | 69.621 | 62.236 | 78.489 | 1.00 | 0.00 | C |

|            |               |        |        |        |      |      |   |
|------------|---------------|--------|--------|--------|------|------|---|
| ATOM 10906 | CG ARG D 950  | 70.210 | 62.647 | 77.140 | 1.00 | 0.00 | C |
| ATOM 10907 | CD ARG D 950  | 69.931 | 61.617 | 76.043 | 1.00 | 0.00 | C |
| ATOM 10908 | NE ARG D 950  | 70.269 | 62.254 | 74.739 | 1.00 | 0.00 | N |
| ATOM 10909 | CZ ARG D 950  | 71.560 | 62.274 | 74.306 | 1.00 | 0.00 | C |
| ATOM 10910 | NH1 ARG D 950 | 72.550 | 61.754 | 75.089 | 1.00 | 0.00 | N |
| ATOM 10911 | NH2 ARG D 950 | 71.863 | 62.817 | 73.093 | 1.00 | 0.00 | N |
| ATOM 10912 | N PHE D 951   | 70.117 | 65.626 | 79.641 | 1.00 | 0.00 | N |
| ATOM 10913 | CA PHE D 951  | 69.920 | 66.993 | 79.254 | 1.00 | 0.00 | C |
| ATOM 10914 | C PHE D 951   | 70.411 | 67.163 | 77.838 | 1.00 | 0.00 | C |
| ATOM 10915 | O PHE D 951   | 69.780 | 67.857 | 77.040 | 1.00 | 0.00 | O |
| ATOM 10916 | CB PHE D 951  | 70.722 | 67.969 | 80.133 | 1.00 | 0.00 | C |
| ATOM 10917 | CG PHE D 951  | 70.280 | 67.766 | 81.539 | 1.00 | 0.00 | C |
| ATOM 10918 | CD1 PHE D 951 | 69.181 | 68.425 | 82.035 | 1.00 | 0.00 | C |
| ATOM 10919 | CD2 PHE D 951 | 70.973 | 66.902 | 82.361 | 1.00 | 0.00 | C |
| ATOM 10920 | CE1 PHE D 951 | 68.781 | 68.226 | 83.336 | 1.00 | 0.00 | C |
| ATOM 10921 | CE2 PHE D 951 | 70.571 | 66.701 | 83.662 | 1.00 | 0.00 | C |
| ATOM 10922 | CZ PHE D 951  | 69.475 | 67.366 | 84.150 | 1.00 | 0.00 | C |
| ATOM 10923 | N PRO D 952   | 71.516 | 66.545 | 77.486 | 1.00 | 0.00 | N |
| ATOM 10924 | CA PRO D 952  | 72.017 | 66.700 | 76.148 | 1.00 | 0.00 | C |
| ATOM 10925 | C PRO D 952   | 71.091 | 66.128 | 75.134 | 1.00 | 0.00 | C |
| ATOM 10926 | O PRO D 952   | 71.379 | 66.234 | 73.944 | 1.00 | 0.00 | O |
| ATOM 10927 | CB PRO D 952  | 73.416 | 66.089 | 76.146 | 1.00 | 0.00 | C |
| ATOM 10928 | CG PRO D 952  | 73.906 | 66.339 | 77.579 | 1.00 | 0.00 | C |
| ATOM 10929 | CD PRO D 952  | 72.621 | 66.354 | 78.422 | 1.00 | 0.00 | C |
| ATOM 10930 | N GLU D 953   | 69.992 | 65.494 | 75.558 | 1.00 | 0.00 | N |
| ATOM 10931 | CA GLU D 953  | 69.095 | 64.971 | 74.574 | 1.00 | 0.00 | C |
| ATOM 10932 | C GLU D 953   | 68.599 | 66.134 | 73.767 | 1.00 | 0.00 | C |
| ATOM 10933 | O GLU D 953   | 68.453 | 66.034 | 72.552 | 1.00 | 0.00 | O |
| ATOM 10934 | CB GLU D 953  | 67.878 | 64.266 | 75.190 | 1.00 | 0.00 | C |
| ATOM 10935 | CG GLU D 953  | 67.054 | 63.460 | 74.179 | 1.00 | 0.00 | C |
| ATOM 10936 | CD GLU D 953  | 66.246 | 64.423 | 73.323 | 1.00 | 0.00 | C |
| ATOM 10937 | OE1 GLU D 953 | 65.550 | 65.298 | 73.909 | 1.00 | 0.00 | O |
| ATOM 10938 | OE2 GLU D 953 | 66.318 | 64.304 | 72.072 | 1.00 | 0.00 | O |
| ATOM 10939 | N TRP D 954   | 68.329 | 67.277 | 74.430 | 1.00 | 0.00 | N |
| ATOM 10940 | CA TRP D 954  | 67.803 | 68.442 | 73.775 | 1.00 | 0.00 | C |
| ATOM 10941 | C TRP D 954   | 68.767 | 68.983 | 72.764 | 1.00 | 0.00 | C |
| ATOM 10942 | O TRP D 954   | 68.376 | 69.336 | 71.653 | 1.00 | 0.00 | O |
| ATOM 10943 | CB TRP D 954  | 67.489 | 69.588 | 74.754 | 1.00 | 0.00 | C |
| ATOM 10944 | CG TRP D 954  | 67.137 | 70.887 | 74.068 | 1.00 | 0.00 | C |
| ATOM 10945 | CD1 TRP D 954 | 67.909 | 71.996 | 73.883 | 1.00 | 0.00 | C |
| ATOM 10946 | CD2 TRP D 954 | 65.877 | 71.159 | 73.432 | 1.00 | 0.00 | C |
| ATOM 10947 | CE2 TRP D 954 | 65.959 | 72.442 | 72.892 | 1.00 | 0.00 | C |
| ATOM 10948 | CE3 TRP D 954 | 64.752 | 70.400 | 73.304 | 1.00 | 0.00 | C |
| ATOM 10949 | NE1 TRP D 954 | 67.210 | 72.947 | 73.180 | 1.00 | 0.00 | N |

|            |               |        |        |        |      |      |   |
|------------|---------------|--------|--------|--------|------|------|---|
| ATOM 10950 | CZ2 TRP D 954 | 64.910 | 72.991 | 72.213 | 1.00 | 0.00 | C |
| ATOM 10951 | CZ3 TRP D 954 | 63.691 | 70.957 | 72.623 | 1.00 | 0.00 | C |
| ATOM 10952 | CH2 TRP D 954 | 63.771 | 72.228 | 72.087 | 1.00 | 0.00 | C |
| ATOM 10953 | N ILE D 955   | 70.065 | 69.033 | 73.110 | 1.00 | 0.00 | N |
| ATOM 10954 | CA ILE D 955  | 71.064 | 69.629 | 72.268 | 1.00 | 0.00 | C |
| ATOM 10955 | C ILE D 955   | 71.110 | 68.900 | 70.966 | 1.00 | 0.00 | C |
| ATOM 10956 | O ILE D 955   | 71.475 | 69.471 | 69.943 | 1.00 | 0.00 | O |
| ATOM 10957 | CB ILE D 955  | 72.456 | 69.621 | 72.837 | 1.00 | 0.00 | C |
| ATOM 10958 | CG1 ILE D 955 | 73.013 | 68.196 | 72.964 | 1.00 | 0.00 | C |
| ATOM 10959 | CG2 ILE D 955 | 72.416 | 70.392 | 74.165 | 1.00 | 0.00 | C |
| ATOM 10960 | CD1 ILE D 955 | 74.515 | 68.157 | 73.237 | 1.00 | 0.00 | C |
| ATOM 10961 | N THR D 956   | 70.738 | 67.608 | 70.974 | 1.00 | 0.00 | N |
| ATOM 10962 | CA THR D 956  | 70.883 | 66.771 | 69.822 | 1.00 | 0.00 | C |
| ATOM 10963 | C THR D 956   | 70.225 | 67.405 | 68.642 | 1.00 | 0.00 | C |
| ATOM 10964 | O THR D 956   | 70.732 | 67.262 | 67.535 | 1.00 | 0.00 | O |
| ATOM 10965 | CB THR D 956  | 70.257 | 65.419 | 69.983 | 1.00 | 0.00 | C |
| ATOM 10966 | CG2 THR D 956 | 70.804 | 64.778 | 71.271 | 1.00 | 0.00 | C |
| ATOM 10967 | OG1 THR D 956 | 68.844 | 65.535 | 70.055 | 1.00 | 0.00 | O |
| ATOM 10968 | N ILE D 957   | 69.087 | 68.102 | 68.801 | 1.00 | 0.00 | N |
| ATOM 10969 | CA ILE D 957  | 68.521 | 68.640 | 67.597 | 1.00 | 0.00 | C |
| ATOM 10970 | C ILE D 957   | 69.465 | 69.620 | 66.948 | 1.00 | 0.00 | C |
| ATOM 10971 | O ILE D 957   | 69.595 | 69.557 | 65.725 | 1.00 | 0.00 | O |
| ATOM 10972 | CB ILE D 957  | 67.080 | 69.117 | 67.709 | 1.00 | 0.00 | C |
| ATOM 10973 | CG1 ILE D 957 | 66.826 | 70.187 | 68.784 | 1.00 | 0.00 | C |
| ATOM 10974 | CG2 ILE D 957 | 66.221 | 67.860 | 67.908 | 1.00 | 0.00 | C |
| ATOM 10975 | CD1 ILE D 957 | 65.440 | 70.827 | 68.695 | 1.00 | 0.00 | C |
| ATOM 10976 | N PRO D 958   | 70.154 | 70.521 | 67.612 | 1.00 | 0.00 | N |
| ATOM 10977 | CA PRO D 958  | 71.110 | 71.313 | 66.886 | 1.00 | 0.00 | C |
| ATOM 10978 | C PRO D 958   | 72.268 | 70.453 | 66.500 | 1.00 | 0.00 | C |
| ATOM 10979 | O PRO D 958   | 72.974 | 70.783 | 65.546 | 1.00 | 0.00 | O |
| ATOM 10980 | CB PRO D 958  | 71.494 | 72.468 | 67.806 | 1.00 | 0.00 | C |
| ATOM 10981 | CG PRO D 958  | 70.249 | 72.652 | 68.689 | 1.00 | 0.00 | C |
| ATOM 10982 | CD PRO D 958  | 69.631 | 71.249 | 68.761 | 1.00 | 0.00 | C |
| ATOM 10983 | N LEU D 959   | 72.479 | 69.351 | 67.242 | 1.00 | 0.00 | N |
| ATOM 10984 | CA LEU D 959  | 73.565 | 68.455 | 66.998 | 1.00 | 0.00 | C |
| ATOM 10985 | C LEU D 959   | 73.324 | 67.867 | 65.647 | 1.00 | 0.00 | C |
| ATOM 10986 | O LEU D 959   | 74.256 | 67.607 | 64.888 | 1.00 | 0.00 | O |
| ATOM 10987 | CB LEU D 959  | 73.639 | 67.321 | 68.035 | 1.00 | 0.00 | C |
| ATOM 10988 | CG LEU D 959  | 74.899 | 66.436 | 67.920 | 1.00 | 0.00 | C |
| ATOM 10989 | CD1 LEU D 959 | 74.899 | 65.585 | 66.643 | 1.00 | 0.00 | C |
| ATOM 10990 | CD2 LEU D 959 | 76.175 | 67.275 | 68.085 | 1.00 | 0.00 | C |
| ATOM 10991 | N VAL D 960   | 72.038 | 67.657 | 65.321 | 1.00 | 0.00 | N |
| ATOM 10992 | CA VAL D 960  | 71.625 | 67.098 | 64.073 | 1.00 | 0.00 | C |
| ATOM 10993 | C VAL D 960   | 72.163 | 67.997 | 63.019 | 1.00 | 0.00 | C |



|                          |        |        |        |      |      |   |
|--------------------------|--------|--------|--------|------|------|---|
| ATOM 10994 O VAL D 960   | 72.698 | 67.541 | 62.011 | 1.00 | 0.00 | O |
| ATOM 10995 CB VAL D 960  | 70.125 | 67.096 | 63.938 | 1.00 | 0.00 | C |
| ATOM 10996 CG1 VAL D 960 | 69.740 | 66.720 | 62.497 | 1.00 | 0.00 | C |
| ATOM 10997 CG2 VAL D 960 | 69.545 | 66.158 | 65.009 | 1.00 | 0.00 | C |
| ATOM 10998 N CYS D 961   | 72.046 | 69.315 | 63.249 | 1.00 | 0.00 | N |
| ATOM 10999 CA CYS D 961  | 72.537 | 70.261 | 62.302 | 1.00 | 0.00 | C |
| ATOM 11000 C CYS D 961   | 74.012 | 70.072 | 62.189 | 1.00 | 0.00 | C |
| ATOM 11001 O CYS D 961   | 74.583 | 70.150 | 61.101 | 1.00 | 0.00 | O |
| ATOM 11002 CB CYS D 961  | 72.290 | 71.716 | 62.726 | 1.00 | 0.00 | C |
| ATOM 11003 SG CYS D 961  | 72.919 | 72.906 | 61.504 | 1.00 | 0.00 | S |
| ATOM 11004 N ILE D 962   | 74.672 | 69.794 | 63.326 | 1.00 | 0.00 | N |
| ATOM 11005 CA ILE D 962  | 76.102 | 69.684 | 63.364 | 1.00 | 0.00 | C |
| ATOM 11006 C ILE D 962   | 76.560 | 68.564 | 62.481 | 1.00 | 0.00 | C |
| ATOM 11007 O ILE D 962   | 77.485 | 68.736 | 61.691 | 1.00 | 0.00 | O |
| ATOM 11008 CB ILE D 962  | 76.617 | 69.358 | 64.736 | 1.00 | 0.00 | C |
| ATOM 11009 CG1 ILE D 962 | 76.186 | 70.427 | 65.753 | 1.00 | 0.00 | C |
| ATOM 11010 CG2 ILE D 962 | 78.141 | 69.193 | 64.633 | 1.00 | 0.00 | C |
| ATOM 11011 CD1 ILE D 962 | 76.730 | 71.819 | 65.449 | 1.00 | 0.00 | C |
| ATOM 11012 N TYR D 963   | 75.903 | 67.393 | 62.569 | 1.00 | 0.00 | N |
| ATOM 11013 CA TYR D 963  | 76.404 | 66.258 | 61.850 | 1.00 | 0.00 | C |
| ATOM 11014 C TYR D 963   | 76.339 | 66.498 | 60.380 | 1.00 | 0.00 | C |
| ATOM 11015 O TYR D 963   | 77.212 | 66.046 | 59.643 | 1.00 | 0.00 | O |
| ATOM 11016 CB TYR D 963  | 75.734 | 64.904 | 62.176 | 1.00 | 0.00 | C |
| ATOM 11017 CG TYR D 963  | 74.323 | 64.844 | 61.708 | 1.00 | 0.00 | C |
| ATOM 11018 CD1 TYR D 963 | 74.023 | 64.675 | 60.376 | 1.00 | 0.00 | C |
| ATOM 11019 CD2 TYR D 963 | 73.298 | 64.915 | 62.619 | 1.00 | 0.00 | C |
| ATOM 11020 CE1 TYR D 963 | 72.716 | 64.605 | 59.956 | 1.00 | 0.00 | C |
| ATOM 11021 CE2 TYR D 963 | 71.988 | 64.844 | 62.206 | 1.00 | 0.00 | C |
| ATOM 11022 CZ TYR D 963  | 71.696 | 64.694 | 60.872 | 1.00 | 0.00 | C |
| ATOM 11023 OH TYR D 963  | 70.351 | 64.621 | 60.452 | 1.00 | 0.00 | O |
| ATOM 11024 N MET D 964   | 75.314 | 67.226 | 59.907 | 1.00 | 0.00 | N |
| ATOM 11025 CA MET D 964  | 75.151 | 67.395 | 58.490 | 1.00 | 0.00 | C |
| ATOM 11026 C MET D 964   | 76.394 | 68.015 | 57.924 | 1.00 | 0.00 | C |
| ATOM 11027 O MET D 964   | 76.874 | 67.605 | 56.870 | 1.00 | 0.00 | O |
| ATOM 11028 CB MET D 964  | 74.000 | 68.348 | 58.132 | 1.00 | 0.00 | C |
| ATOM 11029 CG MET D 964  | 72.618 | 67.853 | 58.567 | 1.00 | 0.00 | C |
| ATOM 11030 SD MET D 964  | 71.269 | 69.022 | 58.217 | 1.00 | 0.00 | S |
| ATOM 11031 CE MET D 964  | 71.813 | 70.254 | 59.439 | 1.00 | 0.00 | C |
| ATOM 11032 N LEU D 965   | 76.961 | 69.021 | 58.608 | 1.00 | 0.00 | N |
| ATOM 11033 CA LEU D 965  | 78.118 | 69.654 | 58.049 | 1.00 | 0.00 | C |
| ATOM 11034 C LEU D 965   | 79.219 | 68.638 | 57.986 | 1.00 | 0.00 | C |
| ATOM 11035 O LEU D 965   | 79.906 | 68.520 | 56.973 | 1.00 | 0.00 | O |
| ATOM 11036 CB LEU D 965  | 78.584 | 70.862 | 58.891 | 1.00 | 0.00 | C |
| ATOM 11037 CG LEU D 965  | 79.654 | 71.785 | 58.251 | 1.00 | 0.00 | C |

|            |               |        |        |        |      |      |   |
|------------|---------------|--------|--------|--------|------|------|---|
| ATOM 11038 | CD1 LEU D 965 | 80.008 | 72.935 | 59.207 | 1.00 | 0.00 | C |
| ATOM 11039 | CD2 LEU D 965 | 80.910 | 71.032 | 57.780 | 1.00 | 0.00 | C |
| ATOM 11040 | N SER D 966   | 79.401 | 67.857 | 59.066 | 1.00 | 0.00 | N |
| ATOM 11041 | CA SER D 966  | 80.490 | 66.922 | 59.113 | 1.00 | 0.00 | C |
| ATOM 11042 | C SER D 966   | 80.314 | 65.886 | 58.052 | 1.00 | 0.00 | C |
| ATOM 11043 | O SER D 966   | 81.244 | 65.574 | 57.313 | 1.00 | 0.00 | O |
| ATOM 11044 | CB SER D 966  | 80.601 | 66.195 | 60.463 | 1.00 | 0.00 | C |
| ATOM 11045 | OG SER D 966  | 79.478 | 65.352 | 60.665 | 1.00 | 0.00 | O |
| ATOM 11046 | N THR D 967   | 79.094 | 65.344 | 57.934 | 1.00 | 0.00 | N |
| ATOM 11047 | CA THR D 967  | 78.858 | 64.296 | 56.993 | 1.00 | 0.00 | C |
| ATOM 11048 | C THR D 967   | 79.114 | 64.800 | 55.614 | 1.00 | 0.00 | C |
| ATOM 11049 | O THR D 967   | 79.736 | 64.119 | 54.801 | 1.00 | 0.00 | O |
| ATOM 11050 | CB THR D 967  | 77.450 | 63.772 | 57.065 | 1.00 | 0.00 | C |
| ATOM 11051 | CG2 THR D 967 | 76.447 | 64.901 | 56.800 | 1.00 | 0.00 | C |
| ATOM 11052 | OG1 THR D 967 | 77.279 | 62.740 | 56.113 | 1.00 | 0.00 | O |
| ATOM 11053 | N ASN D 968   | 78.676 | 66.034 | 55.323 | 1.00 | 0.00 | N |
| ATOM 11054 | CA ASN D 968  | 78.810 | 66.518 | 53.985 | 1.00 | 0.00 | C |
| ATOM 11055 | C ASN D 968   | 80.253 | 66.539 | 53.597 | 1.00 | 0.00 | C |
| ATOM 11056 | O ASN D 968   | 80.605 | 66.143 | 52.487 | 1.00 | 0.00 | O |
| ATOM 11057 | CB ASN D 968  | 78.252 | 67.938 | 53.797 | 1.00 | 0.00 | C |
| ATOM 11058 | CG ASN D 968  | 78.288 | 68.243 | 52.307 | 1.00 | 0.00 | C |
| ATOM 11059 | ND2 ASN D 968 | 77.144 | 68.001 | 51.607 | 1.00 | 0.00 | N |
| ATOM 11060 | OD1 ASN D 968 | 79.310 | 68.670 | 51.772 | 1.00 | 0.00 | O |
| ATOM 11061 | N ILE D 969   | 81.134 | 66.988 | 54.504 | 1.00 | 0.00 | N |
| ATOM 11062 | CA ILE D 969  | 82.506 | 67.085 | 54.114 | 1.00 | 0.00 | C |
| ATOM 11063 | C ILE D 969   | 83.003 | 65.697 | 53.862 | 1.00 | 0.00 | C |
| ATOM 11064 | O ILE D 969   | 83.808 | 65.461 | 52.966 | 1.00 | 0.00 | O |
| ATOM 11065 | CB ILE D 969  | 83.403 | 67.711 | 55.122 | 1.00 | 0.00 | C |
| ATOM 11066 | CG1 ILE D 969 | 82.779 | 68.963 | 55.754 | 1.00 | 0.00 | C |
| ATOM 11067 | CG2 ILE D 969 | 84.609 | 68.115 | 54.274 | 1.00 | 0.00 | C |
| ATOM 11068 | CD1 ILE D 969 | 83.538 | 69.450 | 56.987 | 1.00 | 0.00 | C |
| ATOM 11069 | N LEU D 970   | 82.549 | 64.722 | 54.667 | 1.00 | 0.00 | N |
| ATOM 11070 | CA LEU D 970  | 83.033 | 63.395 | 54.455 | 1.00 | 0.00 | C |
| ATOM 11071 | C LEU D 970   | 82.670 | 62.958 | 53.076 | 1.00 | 0.00 | C |
| ATOM 11072 | O LEU D 970   | 83.512 | 62.419 | 52.362 | 1.00 | 0.00 | O |
| ATOM 11073 | CB LEU D 970  | 82.452 | 62.364 | 55.436 | 1.00 | 0.00 | C |
| ATOM 11074 | CG LEU D 970  | 82.879 | 60.928 | 55.085 | 1.00 | 0.00 | C |
| ATOM 11075 | CD1 LEU D 970 | 84.407 | 60.786 | 55.045 | 1.00 | 0.00 | C |
| ATOM 11076 | CD2 LEU D 970 | 82.219 | 59.920 | 56.030 | 1.00 | 0.00 | C |
| ATOM 11077 | N LEU D 971   | 81.423 | 63.202 | 52.638 | 1.00 | 0.00 | N |
| ATOM 11078 | CA LEU D 971  | 81.074 | 62.759 | 51.322 | 1.00 | 0.00 | C |
| ATOM 11079 | C LEU D 971   | 81.936 | 63.467 | 50.330 | 1.00 | 0.00 | C |
| ATOM 11080 | O LEU D 971   | 82.470 | 62.840 | 49.418 | 1.00 | 0.00 | O |
| ATOM 11081 | CB LEU D 971  | 79.605 | 63.010 | 50.938 | 1.00 | 0.00 | C |

|            |               |        |        |        |      |      |   |
|------------|---------------|--------|--------|--------|------|------|---|
| ATOM 11082 | CG LEU D 971  | 78.610 | 62.061 | 51.633 | 1.00 | 0.00 | C |
| ATOM 11083 | CD1 LEU D 971 | 78.648 | 62.208 | 53.160 | 1.00 | 0.00 | C |
| ATOM 11084 | CD2 LEU D 971 | 77.195 | 62.225 | 51.057 | 1.00 | 0.00 | C |
| ATOM 11085 | N VAL D 972   | 82.137 | 64.788 | 50.495 | 1.00 | 0.00 | N |
| ATOM 11086 | CA VAL D 972  | 82.917 | 65.493 | 49.519 | 1.00 | 0.00 | C |
| ATOM 11087 | C VAL D 972   | 84.280 | 64.896 | 49.533 | 1.00 | 0.00 | C |
| ATOM 11088 | O VAL D 972   | 84.957 | 64.821 | 48.509 | 1.00 | 0.00 | O |
| ATOM 11089 | CB VAL D 972  | 83.028 | 66.981 | 49.747 | 1.00 | 0.00 | C |
| ATOM 11090 | CG1 VAL D 972 | 83.954 | 67.276 | 50.936 | 1.00 | 0.00 | C |
| ATOM 11091 | CG2 VAL D 972 | 83.507 | 67.627 | 48.437 | 1.00 | 0.00 | C |
| ATOM 11092 | N ASN D 973   | 84.717 | 64.440 | 50.715 | 1.00 | 0.00 | N |
| ATOM 11093 | CA ASN D 973  | 86.009 | 63.841 | 50.834 | 1.00 | 0.00 | C |
| ATOM 11094 | C ASN D 973   | 86.066 | 62.651 | 49.925 | 1.00 | 0.00 | C |
| ATOM 11095 | O ASN D 973   | 87.027 | 62.494 | 49.171 | 1.00 | 0.00 | O |
| ATOM 11096 | CB ASN D 973  | 86.276 | 63.341 | 52.262 | 1.00 | 0.00 | C |
| ATOM 11097 | CG ASN D 973  | 87.686 | 62.770 | 52.331 | 1.00 | 0.00 | C |
| ATOM 11098 | ND2 ASN D 973 | 88.073 | 62.275 | 53.537 | 1.00 | 0.00 | N |
| ATOM 11099 | OD1 ASN D 973 | 88.417 | 62.754 | 51.342 | 1.00 | 0.00 | O |
| ATOM 11100 | N LEU D 974   | 85.035 | 61.781 | 49.970 | 1.00 | 0.00 | N |
| ATOM 11101 | CA LEU D 974  | 84.984 | 60.574 | 49.185 | 1.00 | 0.00 | C |
| ATOM 11102 | C LEU D 974   | 84.838 | 60.846 | 47.717 | 1.00 | 0.00 | C |
| ATOM 11103 | O LEU D 974   | 85.505 | 60.210 | 46.906 | 1.00 | 0.00 | O |
| ATOM 11104 | CB LEU D 974  | 83.833 | 59.634 | 49.583 | 1.00 | 0.00 | C |
| ATOM 11105 | CG LEU D 974  | 84.063 | 58.859 | 50.898 | 1.00 | 0.00 | C |
| ATOM 11106 | CD1 LEU D 974 | 84.263 | 59.800 | 52.092 | 1.00 | 0.00 | C |
| ATOM 11107 | CD2 LEU D 974 | 82.945 | 57.831 | 51.134 | 1.00 | 0.00 | C |
| ATOM 11108 | N LEU D 975   | 83.989 | 61.819 | 47.337 | 1.00 | 0.00 | N |
| ATOM 11109 | CA LEU D 975  | 83.657 | 62.045 | 45.956 | 1.00 | 0.00 | C |
| ATOM 11110 | C LEU D 975   | 84.861 | 62.365 | 45.133 | 1.00 | 0.00 | C |
| ATOM 11111 | O LEU D 975   | 84.933 | 61.956 | 43.974 | 1.00 | 0.00 | O |
| ATOM 11112 | CB LEU D 975  | 82.650 | 63.190 | 45.727 | 1.00 | 0.00 | C |
| ATOM 11113 | CG LEU D 975  | 81.164 | 62.813 | 45.904 | 1.00 | 0.00 | C |
| ATOM 11114 | CD1 LEU D 975 | 80.712 | 61.864 | 44.783 | 1.00 | 0.00 | C |
| ATOM 11115 | CD2 LEU D 975 | 80.848 | 62.262 | 47.298 | 1.00 | 0.00 | C |
| ATOM 11116 | N VAL D 976   | 85.844 | 63.087 | 45.693 | 1.00 | 0.00 | N |
| ATOM 11117 | CA VAL D 976  | 86.932 | 63.523 | 44.866 | 1.00 | 0.00 | C |
| ATOM 11118 | C VAL D 976   | 87.635 | 62.361 | 44.223 | 1.00 | 0.00 | C |
| ATOM 11119 | O VAL D 976   | 87.996 | 62.439 | 43.050 | 1.00 | 0.00 | O |
| ATOM 11120 | CB VAL D 976  | 87.967 | 64.324 | 45.587 | 1.00 | 0.00 | C |
| ATOM 11121 | CG1 VAL D 976 | 89.055 | 64.691 | 44.562 | 1.00 | 0.00 | C |
| ATOM 11122 | CG2 VAL D 976 | 87.292 | 65.544 | 46.236 | 1.00 | 0.00 | C |
| ATOM 11123 | N ALA D 977   | 87.862 | 61.249 | 44.949 | 1.00 | 0.00 | N |
| ATOM 11124 | CA ALA D 977  | 88.560 | 60.152 | 44.334 | 1.00 | 0.00 | C |
| ATOM 11125 | C ALA D 977   | 87.689 | 59.583 | 43.228 | 1.00 | 0.00 | C |

|            |     |           |        |        |        |      |      |   |
|------------|-----|-----------|--------|--------|--------|------|------|---|
| ATOM 11126 | O   | ALA D 977 | 86.469 | 59.725 | 43.303 | 1.00 | 0.00 | O |
| ATOM 11127 | CB  | ALA D 977 | 88.895 | 59.016 | 45.314 | 1.00 | 0.00 | C |
| ATOM 11128 | N   | MET D 978 | 87.787 | 58.881 | 43.120 | 1.00 | 0.00 | N |
| ATOM 11129 | CA  | MET D 978 | 87.020 | 58.267 | 42.052 | 1.00 | 0.00 | C |
| ATOM 11130 | C   | MET D 978 | 86.240 | 57.186 | 42.710 | 1.00 | 0.00 | C |
| ATOM 11131 | O   | MET D 978 | 86.780 | 56.422 | 43.509 | 1.00 | 0.00 | O |
| ATOM 11132 | CB  | MET D 978 | 87.863 | 57.597 | 40.957 | 1.00 | 0.00 | C |
| ATOM 11133 | CG  | MET D 978 | 88.678 | 58.581 | 40.123 | 1.00 | 0.00 | C |
| ATOM 11134 | SD  | MET D 978 | 90.046 | 59.355 | 41.029 | 1.00 | 0.00 | S |
| ATOM 11135 | CE  | MET D 978 | 90.638 | 60.362 | 39.642 | 1.00 | 0.00 | C |
| ATOM 11136 | N   | PHE D 979 | 84.939 | 57.086 | 42.392 | 1.00 | 0.00 | N |
| ATOM 11137 | CA  | PHE D 979 | 84.185 | 56.102 | 43.098 | 1.00 | 0.00 | C |
| ATOM 11138 | C   | PHE D 979 | 83.699 | 55.101 | 42.116 | 1.00 | 0.00 | C |
| ATOM 11139 | O   | PHE D 979 | 83.308 | 55.443 | 41.000 | 1.00 | 0.00 | O |
| ATOM 11140 | CB  | PHE D 979 | 82.954 | 56.671 | 43.822 | 1.00 | 0.00 | C |
| ATOM 11141 | CG  | PHE D 979 | 82.438 | 55.610 | 44.724 | 1.00 | 0.00 | C |
| ATOM 11142 | CD1 | PHE D 979 | 82.952 | 55.471 | 45.993 | 1.00 | 0.00 | C |
| ATOM 11143 | CD2 | PHE D 979 | 81.449 | 54.749 | 44.308 | 1.00 | 0.00 | C |
| ATOM 11144 | CE1 | PHE D 979 | 82.485 | 54.493 | 46.836 | 1.00 | 0.00 | C |
| ATOM 11145 | CE2 | PHE D 979 | 80.980 | 53.765 | 45.149 | 1.00 | 0.00 | C |
| ATOM 11146 | CZ  | PHE D 979 | 81.496 | 53.636 | 46.416 | 1.00 | 0.00 | C |
| ATOM 11147 | N   | GLY D 980 | 83.734 | 53.817 | 42.518 | 1.00 | 0.00 | N |
| ATOM 11148 | CA  | GLY D 980 | 83.248 | 52.780 | 41.667 | 1.00 | 0.00 | C |
| ATOM 11149 | C   | GLY D 980 | 84.005 | 52.859 | 40.391 | 1.00 | 0.00 | C |
| ATOM 11150 | O   | GLY D 980 | 85.232 | 52.956 | 40.376 | 1.00 | 0.00 | O |
| ATOM 11151 | N   | TYR D 981 | 83.258 | 52.843 | 39.274 | 1.00 | 0.00 | N |
| ATOM 11152 | CA  | TYR D 981 | 83.856 | 52.891 | 37.981 | 1.00 | 0.00 | C |
| ATOM 11153 | C   | TYR D 981 | 83.377 | 54.159 | 37.362 | 1.00 | 0.00 | C |
| ATOM 11154 | O   | TYR D 981 | 82.212 | 54.527 | 37.502 | 1.00 | 0.00 | O |
| ATOM 11155 | CB  | TYR D 981 | 83.381 | 51.734 | 37.085 | 1.00 | 0.00 | C |
| ATOM 11156 | CG  | TYR D 981 | 84.187 | 51.726 | 35.835 | 1.00 | 0.00 | C |
| ATOM 11157 | CD1 | TYR D 981 | 85.420 | 51.122 | 35.823 | 1.00 | 0.00 | C |
| ATOM 11158 | CD2 | TYR D 981 | 83.710 | 52.299 | 34.681 | 1.00 | 0.00 | C |
| ATOM 11159 | CE1 | TYR D 981 | 86.179 | 51.096 | 34.680 | 1.00 | 0.00 | C |
| ATOM 11160 | CE2 | TYR D 981 | 84.464 | 52.277 | 33.529 | 1.00 | 0.00 | C |
| ATOM 11161 | CZ  | TYR D 981 | 85.699 | 51.675 | 33.530 | 1.00 | 0.00 | C |
| ATOM 11162 | OH  | TYR D 981 | 86.477 | 51.648 | 32.354 | 1.00 | 0.00 | O |
| ATOM 11163 | N   | THR D 982 | 84.281 | 54.883 | 36.679 | 1.00 | 0.00 | N |
| ATOM 11164 | CA  | THR D 982 | 83.882 | 56.113 | 36.068 | 1.00 | 0.00 | C |
| ATOM 11165 | C   | THR D 982 | 82.901 | 55.800 | 35.001 | 1.00 | 0.00 | C |
| ATOM 11166 | O   | THR D 982 | 83.139 | 54.945 | 34.149 | 1.00 | 0.00 | O |
| ATOM 11167 | CB  | THR D 982 | 85.013 | 56.856 | 35.421 | 1.00 | 0.00 | C |
| ATOM 11168 | CG2 | THR D 982 | 84.461 | 58.068 | 34.657 | 1.00 | 0.00 | C |
| ATOM 11169 | OG1 | THR D 982 | 85.950 | 57.266 | 36.399 | 1.00 | 0.00 | O |

|                          |        |        |        |      |      |   |
|--------------------------|--------|--------|--------|------|------|---|
| ATOM 11170 N VAL D 983   | 81.756 | 56.501 | 35.031 | 1.00 | 0.00 | N |
| ATOM 11171 CA VAL D 983  | 80.744 | 56.290 | 34.047 | 1.00 | 0.00 | C |
| ATOM 11172 C VAL D 983   | 80.265 | 57.634 | 33.617 | 1.00 | 0.00 | C |
| ATOM 11173 O VAL D 983   | 80.401 | 58.617 | 34.345 | 1.00 | 0.00 | O |
| ATOM 11174 CB VAL D 983  | 79.550 | 55.554 | 34.575 | 1.00 | 0.00 | C |
| ATOM 11175 CG1 VAL D 983 | 79.990 | 54.139 | 34.991 | 1.00 | 0.00 | C |
| ATOM 11176 CG2 VAL D 983 | 78.943 | 56.379 | 35.718 | 1.00 | 0.00 | C |
| ATOM 11177 N GLY D 984   | 79.710 | 57.705 | 32.393 | 1.00 | 0.00 | N |
| ATOM 11178 CA GLY D 984  | 79.183 | 58.936 | 31.890 | 1.00 | 0.00 | C |
| ATOM 11179 C GLY D 984   | 80.251 | 59.598 | 31.088 | 1.00 | 0.00 | C |
| ATOM 11180 O GLY D 984   | 81.439 | 59.460 | 31.375 | 1.00 | 0.00 | O |
| ATOM 11181 N THR D 985   | 79.835 | 60.346 | 30.050 | 1.00 | 0.00 | N |
| ATOM 11182 CA THR D 985  | 80.759 | 61.051 | 29.215 | 1.00 | 0.00 | C |
| ATOM 11183 C THR D 985   | 81.401 | 62.111 | 30.043 | 1.00 | 0.00 | C |
| ATOM 11184 O THR D 985   | 82.608 | 62.340 | 29.953 | 1.00 | 0.00 | O |
| ATOM 11185 CB THR D 985  | 80.102 | 61.743 | 28.061 | 1.00 | 0.00 | C |
| ATOM 11186 CG2 THR D 985 | 81.179 | 62.502 | 27.270 | 1.00 | 0.00 | C |
| ATOM 11187 OG1 THR D 985 | 79.450 | 60.794 | 27.229 | 1.00 | 0.00 | O |
| ATOM 11188 N VAL D 986   | 80.599 | 62.772 | 30.897 | 1.00 | 0.00 | N |
| ATOM 11189 CA VAL D 986  | 81.113 | 63.848 | 31.686 | 1.00 | 0.00 | C |
| ATOM 11190 C VAL D 986   | 82.225 | 63.317 | 32.520 | 1.00 | 0.00 | C |
| ATOM 11191 O VAL D 986   | 83.311 | 63.893 | 32.566 | 1.00 | 0.00 | O |
| ATOM 11192 CB VAL D 986  | 80.080 | 64.415 | 32.620 | 1.00 | 0.00 | C |
| ATOM 11193 CG1 VAL D 986 | 80.749 | 65.475 | 33.509 | 1.00 | 0.00 | C |
| ATOM 11194 CG2 VAL D 986 | 78.899 | 64.943 | 31.788 | 1.00 | 0.00 | C |
| ATOM 11195 N GLN D 987   | 81.995 | 62.174 | 33.190 | 1.00 | 0.00 | N |
| ATOM 11196 CA GLN D 987  | 83.036 | 61.666 | 34.028 | 1.00 | 0.00 | C |
| ATOM 11197 C GLN D 987   | 84.039 | 61.025 | 33.130 | 1.00 | 0.00 | C |
| ATOM 11198 O GLN D 987   | 83.692 | 60.247 | 32.242 | 1.00 | 0.00 | O |
| ATOM 11199 CB GLN D 987  | 82.526 | 60.639 | 35.053 | 1.00 | 0.00 | C |
| ATOM 11200 CG GLN D 987  | 83.487 | 60.370 | 36.211 | 1.00 | 0.00 | C |
| ATOM 11201 CD GLN D 987  | 82.774 | 59.432 | 37.174 | 1.00 | 0.00 | C |
| ATOM 11202 NE2 GLN D 987 | 81.460 | 59.696 | 37.409 | 1.00 | 0.00 | N |
| ATOM 11203 OE1 GLN D 987 | 83.368 | 58.498 | 37.709 | 1.00 | 0.00 | O |
| ATOM 11204 N GLU D 988   | 85.330 | 61.358 | 33.325 | 1.00 | 0.00 | N |
| ATOM 11205 CA GLU D 988  | 86.333 | 60.789 | 32.480 | 1.00 | 0.00 | C |
| ATOM 11206 C GLU D 988   | 87.496 | 60.433 | 33.346 | 1.00 | 0.00 | C |
| ATOM 11207 O GLU D 988   | 87.817 | 61.145 | 34.296 | 1.00 | 0.00 | O |
| ATOM 11208 CB GLU D 988  | 86.835 | 61.777 | 31.410 | 1.00 | 0.00 | C |
| ATOM 11209 CG GLU D 988  | 87.783 | 61.167 | 30.375 | 1.00 | 0.00 | C |
| ATOM 11210 CD GLU D 988  | 89.180 | 61.112 | 30.967 | 1.00 | 0.00 | C |
| ATOM 11211 OE1 GLU D 988 | 89.430 | 61.818 | 31.983 | 1.00 | 0.00 | O |
| ATOM 11212 OE2 GLU D 988 | 90.020 | 60.361 | 30.409 | 1.00 | 0.00 | O |
| ATOM 11213 N ASN D 989   | 88.153 | 59.295 | 33.050 | 1.00 | 0.00 | N |

|                          |         |        |        |      |      |   |
|--------------------------|---------|--------|--------|------|------|---|
| ATOM 11214 CA ASN D 989  | 89.307  | 58.934 | 33.814 | 1.00 | 0.00 | C |
| ATOM 11215 C ASN D 989   | 90.443  | 58.838 | 32.853 | 1.00 | 0.00 | C |
| ATOM 11216 O ASN D 989   | 90.318  | 58.238 | 31.787 | 1.00 | 0.00 | O |
| ATOM 11217 CB ASN D 989  | 89.193  | 57.578 | 34.532 | 1.00 | 0.00 | C |
| ATOM 11218 CG ASN D 989  | 90.337  | 57.484 | 35.535 | 1.00 | 0.00 | C |
| ATOM 11219 ND2 ASN D 989 | 90.007  | 57.082 | 36.790 | 1.00 | 0.00 | N |
| ATOM 11220 OD1 ASN D 989 | 91.490  | 57.769 | 35.214 | 1.00 | 0.00 | O |
| ATOM 11221 N ASN D 990   | 91.591  | 59.447 | 33.195 | 1.00 | 0.00 | N |
| ATOM 11222 CA ASN D 990  | 92.680  | 59.380 | 32.272 | 1.00 | 0.00 | C |
| ATOM 11223 C ASN D 990   | 93.696  | 58.433 | 32.816 | 1.00 | 0.00 | C |
| ATOM 11224 O ASN D 990   | 94.234  | 58.632 | 33.901 | 1.00 | 0.00 | O |
| ATOM 11225 CB ASN D 990  | 93.416  | 60.716 | 32.071 | 1.00 | 0.00 | C |
| ATOM 11226 CG ASN D 990  | 92.508  | 61.715 | 31.370 | 1.00 | 0.00 | C |
| ATOM 11227 ND2 ASN D 990 | 92.366  | 61.566 | 30.025 | 1.00 | 0.00 | N |
| ATOM 11228 OD1 ASN D 990 | 91.953  | 62.615 | 32.000 | 1.00 | 0.00 | O |
| ATOM 11229 N ASP D 991   | 93.961  | 57.348 | 32.066 | 1.00 | 0.00 | N |
| ATOM 11230 CA ASP D 991  | 94.984  | 56.434 | 32.466 | 1.00 | 0.00 | C |
| ATOM 11231 C ASP D 991   | 96.282  | 57.156 | 32.314 | 1.00 | 0.00 | C |
| ATOM 11232 O ASP D 991   | 97.214  | 56.966 | 33.093 | 1.00 | 0.00 | O |
| ATOM 11233 CB ASP D 991  | 95.032  | 55.155 | 31.613 | 1.00 | 0.00 | C |
| ATOM 11234 CG ASP D 991  | 95.332  | 55.531 | 30.170 | 1.00 | 0.00 | C |
| ATOM 11235 OD1 ASP D 991 | 94.825  | 56.589 | 29.710 | 1.00 | 0.00 | O |
| ATOM 11236 OD2 ASP D 991 | 96.076  | 54.761 | 29.507 | 1.00 | 0.00 | O |
| ATOM 11237 N GLN D 992   | 96.363  | 58.017 | 31.281 | 1.00 | 0.00 | N |
| ATOM 11238 CA GLN D 992  | 97.569  | 58.740 | 31.013 | 1.00 | 0.00 | C |
| ATOM 11239 C GLN D 992   | 97.867  | 59.702 | 32.127 | 1.00 | 0.00 | C |
| ATOM 11240 O GLN D 992   | 99.023  | 59.835 | 32.526 | 1.00 | 0.00 | O |
| ATOM 11241 CB GLN D 992  | 97.564  | 59.472 | 29.656 | 1.00 | 0.00 | C |
| ATOM 11242 CG GLN D 992  | 96.492  | 60.544 | 29.462 | 1.00 | 0.00 | C |
| ATOM 11243 CD GLN D 992  | 96.666  | 61.090 | 28.048 | 1.00 | 0.00 | C |
| ATOM 11244 NE2 GLN D 992 | 96.544  | 60.195 | 27.029 | 1.00 | 0.00 | N |
| ATOM 11245 OE1 GLN D 992 | 96.906  | 62.284 | 27.852 | 1.00 | 0.00 | O |
| ATOM 11246 N VAL D 993   | 96.840  | 60.371 | 32.693 | 1.00 | 0.00 | N |
| ATOM 11247 CA VAL D 993  | 97.089  | 61.320 | 33.745 | 1.00 | 0.00 | C |
| ATOM 11248 C VAL D 993   | 97.761  | 60.592 | 34.849 | 1.00 | 0.00 | C |
| ATOM 11249 O VAL D 993   | 98.729  | 61.074 | 35.437 | 1.00 | 0.00 | O |
| ATOM 11250 CB VAL D 993  | 95.848  | 61.901 | 34.369 | 1.00 | 0.00 | C |
| ATOM 11251 CG1 VAL D 993 | 96.266  | 62.696 | 35.617 | 1.00 | 0.00 | C |
| ATOM 11252 CG2 VAL D 993 | 95.101  | 62.759 | 33.339 | 1.00 | 0.00 | C |
| ATOM 11253 N TRP D 994   | 97.261  | 59.391 | 35.166 | 1.00 | 0.00 | N |
| ATOM 11254 CA TRP D 994  | 97.902  | 58.652 | 36.200 | 1.00 | 0.00 | C |
| ATOM 11255 C TRP D 994   | 99.319  | 58.434 | 35.859 | 1.00 | 0.00 | C |
| ATOM 11256 O TRP D 994   | 100.190 | 58.658 | 36.696 | 1.00 | 0.00 | O |
| ATOM 11257 CB TRP D 994  | 97.464  | 57.216 | 36.315 | 1.00 | 0.00 | C |

|            |               |         |        |        |      |      |     |
|------------|---------------|---------|--------|--------|------|------|-----|
| ATOM 11258 | CG TRP D 994  | 98.635  | 56.364 | 36.756 | 1.00 | 0.00 | C   |
| ATOM 11259 | CD1 TRP D 994 | 99.386  | 56.359 | 37.905 | 1.00 | 0.00 | C   |
| ATOM 11260 | CD2 TRP D 994 | 99.028  | 55.187 | 36.026 | 1.00 | 0.00 | C   |
| ATOM 11261 | CE2 TRP D 994 | 99.987  | 54.520 | 36.788 | 1.00 | 0.00 | C   |
| ATOM 11262 | CE3 TRP D 994 | 98.591  | 54.682 | 34.835 | 1.00 | 0.00 | C   |
| ATOM 11263 | NE1 TRP D 994 | 100.198 | 55.250 | 37.934 | 1.00 | 0.00 | N   |
| ATOM 11264 | CZ2 TRP D 994 | 100.527 | 53.339 | 36.366 | 1.00 | 0.00 | C   |
| ATOM 11265 | CZ3 TRP D 994 | 99.161  | 53.509 | 34.401 | 1.00 | 0.00 | C   |
| ATOM 11266 | CH2 TRP D 994 | 100.111 | 52.848 | 35.153 | 1.00 | 0.00 | C   |
| ATOM 11267 | N LYS D 995   | 99.565  | 57.959 | 34.626 | 1.00 | 0.00 | N   |
| ATOM 11268 | CA LYS D 995  | 100.885 | 57.537 | 34.275 | 1.00 | 0.00 | C   |
| ATOM 11269 | C LYS D 995   | 101.807 | 58.677 | 34.491 | 1.00 | 0.00 | C   |
| ATOM 11270 | O LYS D 995   | 102.936 | 58.476 | 34.936 | 1.00 | 0.00 | O   |
| ATOM 11271 | CB LYS D 995  | 101.047 | 57.127 | 32.800 | 1.00 | 0.00 | C   |
| ATOM 11272 | CG LYS D 995  | 100.754 | 55.658 | 32.491 | 1.00 | 0.00 | C   |
| ATOM 11273 | CD LYS D 995  | 101.760 | 54.670 | 33.094 | 1.00 | 0.00 | C   |
| ATOM 11274 | CE LYS D 995  | 101.545 | 53.234 | 32.606 | 1.00 | 0.00 | C   |
| ATOM 11275 | NZ LYS D 995  | 102.604 | 52.345 | 33.128 | 1.00 | 0.00 | NI+ |
| ATOM 11276 | N PHE D 996   | 101.347 | 59.898 | 34.190 | 1.00 | 0.00 | N   |
| ATOM 11277 | CA PHE D 996  | 102.193 | 61.032 | 34.363 | 1.00 | 0.00 | C   |
| ATOM 11278 | C PHE D 996   | 102.591 | 61.103 | 35.802 | 1.00 | 0.00 | C   |
| ATOM 11279 | O PHE D 996   | 103.772 | 61.228 | 36.116 | 1.00 | 0.00 | O   |
| ATOM 11280 | CB PHE D 996  | 101.489 | 62.360 | 34.016 | 1.00 | 0.00 | C   |
| ATOM 11281 | CG PHE D 996  | 102.465 | 63.467 | 34.235 | 1.00 | 0.00 | C   |
| ATOM 11282 | CD1 PHE D 996 | 103.338 | 63.840 | 33.240 | 1.00 | 0.00 | C   |
| ATOM 11283 | CD2 PHE D 996 | 102.510 | 64.131 | 35.439 | 1.00 | 0.00 | C   |
| ATOM 11284 | CE1 PHE D 996 | 104.240 | 64.857 | 33.439 | 1.00 | 0.00 | C   |
| ATOM 11285 | CE2 PHE D 996 | 103.409 | 65.151 | 35.642 | 1.00 | 0.00 | C   |
| ATOM 11286 | CZ PHE D 996  | 104.277 | 65.518 | 34.642 | 1.00 | 0.00 | C   |
| ATOM 11287 | N GLN D 997   | 101.613 | 61.005 | 36.725 | 1.00 | 0.00 | N   |
| ATOM 11288 | CA GLN D 997  | 101.933 | 61.112 | 38.120 | 1.00 | 0.00 | C   |
| ATOM 11289 | C GLN D 997   | 102.798 | 59.969 | 38.538 | 1.00 | 0.00 | C   |
| ATOM 11290 | O GLN D 997   | 103.718 | 60.134 | 39.334 | 1.00 | 0.00 | O   |
| ATOM 11291 | CB GLN D 997  | 100.721 | 61.122 | 39.069 | 1.00 | 0.00 | C   |
| ATOM 11292 | CG GLN D 997  | 101.162 | 61.184 | 40.537 | 1.00 | 0.00 | C   |
| ATOM 11293 | CD GLN D 997  | 99.970  | 61.527 | 41.409 | 1.00 | 0.00 | C   |
| ATOM 11294 | NE2 GLN D 997 | 98.994  | 62.275 | 40.834 | 1.00 | 0.00 | N   |
| ATOM 11295 | OE1 GLN D 997 | 99.918  | 61.168 | 42.586 | 1.00 | 0.00 | O   |
| ATOM 11296 | N ARG D 998   | 102.514 | 58.769 | 38.017 | 1.00 | 0.00 | N   |
| ATOM 11297 | CA ARG D 998  | 103.253 | 57.597 | 38.379 | 1.00 | 0.00 | C   |
| ATOM 11298 | C ARG D 998   | 104.690 | 57.777 | 37.991 | 1.00 | 0.00 | C   |
| ATOM 11299 | O ARG D 998   | 105.593 | 57.493 | 38.773 | 1.00 | 0.00 | O   |
| ATOM 11300 | CB ARG D 998  | 102.721 | 56.381 | 37.610 | 1.00 | 0.00 | C   |
| ATOM 11301 | CG ARG D 998  | 103.626 | 55.158 | 37.649 | 1.00 | 0.00 | C   |

|            |               |         |        |        |      |      |   |
|------------|---------------|---------|--------|--------|------|------|---|
| ATOM 11302 | CD ARG D 998  | 104.501 | 55.013 | 36.404 | 1.00 | 0.00 | C |
| ATOM 11303 | NE ARG D 998  | 105.309 | 53.775 | 36.592 | 1.00 | 0.00 | N |
| ATOM 11304 | CZ ARG D 998  | 104.748 | 52.568 | 36.295 | 1.00 | 0.00 | C |
| ATOM 11305 | NH1 ARG D 998 | 103.474 | 52.516 | 35.812 | 1.00 | 0.00 | N |
| ATOM 11306 | NH2 ARG D 998 | 105.448 | 51.414 | 36.498 | 1.00 | 0.00 | N |
| ATOM 11307 | N TYR D 999   | 104.914 | 58.270 | 36.758 | 1.00 | 0.00 | N |
| ATOM 11308 | CA TYR D 999  | 106.210 | 58.480 | 36.185 | 1.00 | 0.00 | C |
| ATOM 11309 | C TYR D 999   | 106.927 | 59.525 | 36.973 | 1.00 | 0.00 | C |
| ATOM 11310 | O TYR D 999   | 108.116 | 59.402 | 37.259 | 1.00 | 0.00 | O |
| ATOM 11311 | CB TYR D 999  | 106.096 | 58.972 | 34.729 | 1.00 | 0.00 | C |
| ATOM 11312 | CG TYR D 999  | 107.448 | 59.265 | 34.183 | 1.00 | 0.00 | C |
| ATOM 11313 | CD1 TYR D 999 | 108.312 | 58.236 | 33.908 | 1.00 | 0.00 | C |
| ATOM 11314 | CD2 TYR D 999 | 107.852 | 60.551 | 33.913 | 1.00 | 0.00 | C |
| ATOM 11315 | CE1 TYR D 999 | 109.562 | 58.469 | 33.394 | 1.00 | 0.00 | C |
| ATOM 11316 | CE2 TYR D 999 | 109.102 | 60.796 | 33.393 | 1.00 | 0.00 | C |
| ATOM 11317 | CZ TYR D 999  | 109.962 | 59.755 | 33.139 | 1.00 | 0.00 | C |
| ATOM 11318 | OH TYR D 999  | 111.245 | 59.990 | 32.609 | 1.00 | 0.00 | O |
| ATOM 11319 | N PHE D1000   | 106.208 | 60.592 | 37.347 | 1.00 | 0.00 | N |
| ATOM 11320 | CA PHE D1000  | 106.803 | 61.679 | 38.060 | 1.00 | 0.00 | C |
| ATOM 11321 | C PHE D1000   | 107.331 | 61.155 | 39.354 | 1.00 | 0.00 | C |
| ATOM 11322 | O PHE D1000   | 108.466 | 61.447 | 39.728 | 1.00 | 0.00 | O |
| ATOM 11323 | CB PHE D1000  | 105.779 | 62.785 | 38.376 | 1.00 | 0.00 | C |
| ATOM 11324 | CG PHE D1000  | 106.468 | 63.878 | 39.115 | 1.00 | 0.00 | C |
| ATOM 11325 | CD1 PHE D1000 | 107.203 | 64.826 | 38.436 | 1.00 | 0.00 | C |
| ATOM 11326 | CD2 PHE D1000 | 106.372 | 63.960 | 40.485 | 1.00 | 0.00 | C |
| ATOM 11327 | CE1 PHE D1000 | 107.834 | 65.837 | 39.119 | 1.00 | 0.00 | C |
| ATOM 11328 | CE2 PHE D1000 | 107.004 | 64.971 | 41.170 | 1.00 | 0.00 | C |
| ATOM 11329 | CZ PHE D1000  | 107.736 | 65.911 | 40.486 | 1.00 | 0.00 | C |
| ATOM 11330 | N LEU D1001   | 106.523 | 60.347 | 40.064 | 1.00 | 0.00 | N |
| ATOM 11331 | CA LEU D1001  | 106.926 | 59.843 | 41.342 | 1.00 | 0.00 | C |
| ATOM 11332 | C LEU D1001   | 108.125 | 58.952 | 41.203 | 1.00 | 0.00 | C |
| ATOM 11333 | O LEU D1001   | 109.065 | 59.058 | 41.990 | 1.00 | 0.00 | O |
| ATOM 11334 | CB LEU D1001  | 105.839 | 59.030 | 42.061 | 1.00 | 0.00 | C |
| ATOM 11335 | CG LEU D1001  | 104.636 | 59.876 | 42.506 | 1.00 | 0.00 | C |
| ATOM 11336 | CD1 LEU D1001 | 103.697 | 59.054 | 43.397 | 1.00 | 0.00 | C |
| ATOM 11337 | CD2 LEU D1001 | 105.085 | 61.185 | 43.171 | 1.00 | 0.00 | C |
| ATOM 11338 | N VAL D1002   | 108.134 | 58.058 | 40.200 | 1.00 | 0.00 | N |
| ATOM 11339 | CA VAL D1002  | 109.231 | 57.142 | 40.081 | 1.00 | 0.00 | C |
| ATOM 11340 | C VAL D1002   | 110.480 | 57.911 | 39.792 | 1.00 | 0.00 | C |
| ATOM 11341 | O VAL D1002   | 111.539 | 57.604 | 40.334 | 1.00 | 0.00 | O |
| ATOM 11342 | CB VAL D1002  | 109.048 | 56.119 | 38.994 | 1.00 | 0.00 | C |
| ATOM 11343 | CG1 VAL D1002 | 107.807 | 55.269 | 39.329 | 1.00 | 0.00 | C |
| ATOM 11344 | CG2 VAL D1002 | 108.979 | 56.828 | 37.632 | 1.00 | 0.00 | C |
| ATOM 11345 | N GLN D1003   | 110.392 | 58.940 | 38.922 | 1.00 | 0.00 | N |



|            |     |           |         |        |        |      |      |   |
|------------|-----|-----------|---------|--------|--------|------|------|---|
| ATOM 11346 | CA  | GLN D1003 | 111.560 | 59.698 | 38.578 | 1.00 | 0.00 | C |
| ATOM 11347 | C   | GLN D1003 | 112.075 | 60.387 | 39.799 | 1.00 | 0.00 | C |
| ATOM 11348 | O   | GLN D1003 | 113.276 | 60.414 | 40.044 | 1.00 | 0.00 | O |
| ATOM 11349 | CB  | GLN D1003 | 111.308 | 60.844 | 37.594 | 1.00 | 0.00 | C |
| ATOM 11350 | CG  | GLN D1003 | 110.994 | 60.433 | 36.165 | 1.00 | 0.00 | C |
| ATOM 11351 | CD  | GLN D1003 | 111.082 | 61.724 | 35.376 | 1.00 | 0.00 | C |
| ATOM 11352 | NE2 | GLN D1003 | 110.009 | 62.557 | 35.459 | 1.00 | 0.00 | N |
| ATOM 11353 | OE1 | GLN D1003 | 112.093 | 62.001 | 34.735 | 1.00 | 0.00 | O |
| ATOM 11354 | N   | GLU D1004 | 111.162 | 60.963 | 40.603 | 1.00 | 0.00 | N |
| ATOM 11355 | CA  | GLU D1004 | 111.571 | 61.701 | 41.761 | 1.00 | 0.00 | C |
| ATOM 11356 | C   | GLU D1004 | 112.271 | 60.744 | 42.671 | 1.00 | 0.00 | C |
| ATOM 11357 | O   | GLU D1004 | 113.279 | 61.069 | 43.294 | 1.00 | 0.00 | O |
| ATOM 11358 | CB  | GLU D1004 | 110.370 | 62.297 | 42.518 | 1.00 | 0.00 | C |
| ATOM 11359 | CG  | GLU D1004 | 110.750 | 63.107 | 43.758 | 1.00 | 0.00 | C |
| ATOM 11360 | CD  | GLU D1004 | 109.459 | 63.620 | 44.380 | 1.00 | 0.00 | C |
| ATOM 11361 | OE1 | GLU D1004 | 108.558 | 64.039 | 43.605 | 1.00 | 0.00 | O |
| ATOM 11362 | OE2 | GLU D1004 | 109.351 | 63.594 | 45.635 | 1.00 | 0.00 | O |
| ATOM 11363 | N   | TYR D1005 | 111.727 | 59.519 | 42.735 | 1.00 | 0.00 | N |
| ATOM 11364 | CA  | TYR D1005 | 112.214 | 58.419 | 43.510 | 1.00 | 0.00 | C |
| ATOM 11365 | C   | TYR D1005 | 113.598 | 58.083 | 43.042 | 1.00 | 0.00 | C |
| ATOM 11366 | O   | TYR D1005 | 114.515 | 57.943 | 43.847 | 1.00 | 0.00 | O |
| ATOM 11367 | CB  | TYR D1005 | 111.272 | 57.220 | 43.256 | 1.00 | 0.00 | C |
| ATOM 11368 | CG  | TYR D1005 | 111.855 | 55.884 | 43.572 | 1.00 | 0.00 | C |
| ATOM 11369 | CD1 | TYR D1005 | 112.723 | 55.290 | 42.684 | 1.00 | 0.00 | C |
| ATOM 11370 | CD2 | TYR D1005 | 111.505 | 55.199 | 44.713 | 1.00 | 0.00 | C |
| ATOM 11371 | CE1 | TYR D1005 | 113.259 | 54.051 | 42.930 | 1.00 | 0.00 | C |
| ATOM 11372 | CE2 | TYR D1005 | 112.039 | 53.957 | 44.967 | 1.00 | 0.00 | C |
| ATOM 11373 | CZ  | TYR D1005 | 112.915 | 53.381 | 44.076 | 1.00 | 0.00 | C |
| ATOM 11374 | OH  | TYR D1005 | 113.458 | 52.106 | 44.341 | 1.00 | 0.00 | O |
| ATOM 11375 | N   | CYS D1006 | 113.777 | 57.978 | 41.715 | 1.00 | 0.00 | N |
| ATOM 11376 | CA  | CYS D1006 | 115.049 | 57.609 | 41.172 | 1.00 | 0.00 | C |
| ATOM 11377 | C   | CYS D1006 | 116.051 | 58.670 | 41.501 | 1.00 | 0.00 | C |
| ATOM 11378 | O   | CYS D1006 | 117.171 | 58.373 | 41.911 | 1.00 | 0.00 | O |
| ATOM 11379 | CB  | CYS D1006 | 115.020 | 57.448 | 39.643 | 1.00 | 0.00 | C |
| ATOM 11380 | SG  | CYS D1006 | 113.937 | 56.087 | 39.111 | 1.00 | 0.00 | S |
| ATOM 11381 | N   | SER D1007 | 115.667 | 59.948 | 41.333 | 1.00 | 0.00 | N |
| ATOM 11382 | CA  | SER D1007 | 116.604 | 61.004 | 41.568 | 1.00 | 0.00 | C |
| ATOM 11383 | C   | SER D1007 | 117.022 | 60.978 | 43.003 | 1.00 | 0.00 | C |
| ATOM 11384 | O   | SER D1007 | 118.214 | 60.986 | 43.308 | 1.00 | 0.00 | O |
| ATOM 11385 | CB  | SER D1007 | 116.007 | 62.396 | 41.286 | 1.00 | 0.00 | C |
| ATOM 11386 | OG  | SER D1007 | 116.974 | 63.406 | 41.537 | 1.00 | 0.00 | O |
| ATOM 11387 | N   | ARG D1008 | 116.043 | 60.935 | 43.925 | 1.00 | 0.00 | N |
| ATOM 11388 | CA  | ARG D1008 | 116.361 | 60.990 | 45.325 | 1.00 | 0.00 | C |
| ATOM 11389 | C   | ARG D1008 | 117.150 | 59.787 | 45.715 | 1.00 | 0.00 | C |

|                          |         |        |        |      |      |      |
|--------------------------|---------|--------|--------|------|------|------|
| ATOM 11390 O ARG D1008   | 118.170 | 59.893 | 46.393 | 1.00 | 0.00 | O    |
| ATOM 11391 CB ARG D1008  | 115.109 | 61.036 | 46.217 | 1.00 | 0.00 | C    |
| ATOM 11392 CG ARG D1008  | 115.425 | 61.097 | 47.714 | 1.00 | 0.00 | C    |
| ATOM 11393 CD ARG D1008  | 114.174 | 61.203 | 48.592 | 1.00 | 0.00 | C    |
| ATOM 11394 NE ARG D1008  | 114.621 | 61.198 | 50.015 | 1.00 | 0.00 | N    |
| ATOM 11395 CZ ARG D1008  | 114.599 | 60.036 | 50.729 | 1.00 | 0.00 | C    |
| ATOM 11396 NH1 ARG D1008 | 114.126 | 58.892 | 50.159 | 1.00 | 0.00 | N    |
| ATOM 11397 NH2 ARG D1008 | 115.047 | 60.018 | 52.020 | 1.00 | 0.00 | N    |
| ATOM 11398 N LEU D1009   | 116.699 | 58.601 | 45.271 | 1.00 | 0.00 | N    |
| ATOM 11399 CA LEU D1009  | 117.335 | 57.371 | 45.634 | 1.00 | 0.00 | C    |
| ATOM 11400 C LEU D1009   | 118.693 | 57.278 | 45.023 | 1.00 | 0.00 | C    |
| ATOM 11401 O LEU D1009   | 119.545 | 56.550 | 45.533 | 1.00 | 0.00 | O    |
| ATOM 11402 CB LEU D1009  | 116.534 | 56.107 | 45.293 | 1.00 | 0.00 | C    |
| ATOM 11403 CG LEU D1009  | 115.289 | 55.963 | 46.184 | 1.00 | 0.00 | C    |
| ATOM 11404 CD1 LEU D1009 | 114.700 | 54.551 | 46.092 | 1.00 | 0.00 | C    |
| ATOM 11405 CD2 LEU D1009 | 115.585 | 56.389 | 47.632 | 1.00 | 0.00 | C    |
| ATOM 11406 N ASN D1010   | 118.915 | 57.943 | 43.876 | 1.00 | 0.00 | N    |
| ATOM 11407 CA ASN D1010  | 120.218 | 57.843 | 43.292 | 1.00 | 0.00 | C    |
| ATOM 11408 C ASN D1010   | 121.124 | 58.881 | 43.942 | 1.00 | 0.00 | C    |
| ATOM 11409 O ASN D1010   | 120.682 | 59.500 | 44.946 | 1.00 | 0.00 | O    |
| ATOM 11410 CB ASN D1010  | 120.238 | 58.074 | 41.769 | 1.00 | 0.00 | C    |
| ATOM 11411 CG ASN D1010  | 121.523 | 57.452 | 41.231 | 1.00 | 0.00 | C    |
| ATOM 11412 ND2 ASN D1010 | 121.670 | 57.426 | 39.880 | 1.00 | 0.00 | N    |
| ATOM 11413 OD1 ASN D1010 | 122.371 | 56.988 | 41.993 | 1.00 | 0.00 | O    |
| ATOM 11414 OXT ASN D1010 | 122.273 | 59.062 | 43.455 | 1.00 | 0.00 | O1-  |
| HETATM11415 CA CA1 D1011 | 111.447 | 63.958 | 52.345 | 1.00 | 0.00 | CA2+ |
| TER 11416 CA1 D1011      |         |        |        |      |      |      |
| CONNECT 403 404          |         |        |        |      |      |      |
| CONNECT 404 403 405 407  |         |        |        |      |      |      |
| CONNECT 405 404 406      |         |        |        |      |      |      |
| CONNECT 406 405          |         |        |        |      |      |      |
| CONNECT 407 404 408      |         |        |        |      |      |      |
| CONNECT 408 407 410 409  |         |        |        |      |      |      |
| CONNECT 409 408 412      |         |        |        |      |      |      |
| CONNECT 410 408 411      |         |        |        |      |      |      |
| CONNECT 411 410 412      |         |        |        |      |      |      |
| CONNECT 412 409 411      |         |        |        |      |      |      |
| CONNECT 766 767          |         |        |        |      |      |      |
| CONNECT 767 766 768 770  |         |        |        |      |      |      |
| CONNECT 768 767 769      |         |        |        |      |      |      |
| CONNECT 769 768          |         |        |        |      |      |      |
| CONNECT 770 767 771      |         |        |        |      |      |      |
| CONNECT 771 770 772 773  |         |        |        |      |      |      |
| CONNECT 772 771 775      |         |        |        |      |      |      |

CONNECT 773 771 774  
CONNECT 774 773 775  
CONNECT 775 772 774  
CONNECT 796 797  
CONNECT 797 796 798 800  
CONNECT 798 797 799  
CONNECT 799 798  
CONNECT 800 797 801  
CONNECT 801 800 803 802  
CONNECT 802 801 805  
CONNECT 803 801 804  
CONNECT 804 803 805  
CONNECT 805 802 804  
CONNECT 936 937  
CONNECT 937 936 938 940  
CONNECT 938 937 939  
CONNECT 939 938  
CONNECT 940 937 941  
CONNECT 941 940 942  
CONNECT 942 941 943 944  
CONNECT 943 942  
CONNECT 944 942  
CONNECT 963 964  
CONNECT 964 963 965 967  
CONNECT 965 964 966  
CONNECT 966 965  
CONNECT 967 964 968  
CONNECT 968 967 969  
CONNECT 969 968 971 970  
CONNECT 970 969  
CONNECT 971 969  
CONNECT 1092 1093  
CONNECT 1093 1092 1094 1096  
CONNECT 1094 1093 1095  
CONNECT 1095 1094  
CONNECT 1096 1093 1097  
CONNECT 1097 1096 1099 1098  
CONNECT 1098 1097  
CONNECT 1099 1097  
CONNECT 1115 1116  
CONNECT 1116 1115 1119 1117  
CONNECT 1117 1116 1118  
CONNECT 1118 1117  
CONNECT 1119 1116 1120

CONNECT 1120 1119 1121 1122  
CONNECT 1121 1120  
CONNECT 1122 1120  
CONNECT 1246 1247  
CONNECT 1247 1246 1248 1250  
CONNECT 1248 1247 1249  
CONNECT 1249 1248  
CONNECT 1250 1247 1251  
CONNECT 1251 1250 1253 1252  
CONNECT 1252 1251 1255  
CONNECT 1253 1251 1254  
CONNECT 1254 1253 1255  
CONNECT 1255 1252 1254  
CONNECT 1467 1468  
CONNECT 1468 1467 1469 1471  
CONNECT 1469 1468 1470  
CONNECT 1470 1469  
CONNECT 1471 1468 1472  
CONNECT 1472 1471 1474 1473  
CONNECT 1473 1472 1476  
CONNECT 1474 1472 1475  
CONNECT 1475 1474 1476  
CONNECT 1476 1473 1475  
CONNECT 2167 2168  
CONNECT 2168 2167 2171 2169  
CONNECT 2169 2168 2170  
CONNECT 2170 2169  
CONNECT 2171 2168 2172  
CONNECT 2172 2171 2174 2173  
CONNECT 2173 2172 2176  
CONNECT 2174 2172 2175  
CONNECT 2175 2174 2176  
CONNECT 2176 2173 2175  
CONNECT 2306 2307  
CONNECT 2307 2306 2310 2308  
CONNECT 2308 2307 2309  
CONNECT 2309 2308  
CONNECT 2310 2307 2311  
CONNECT 2311 2310 2313 2312  
CONNECT 2312 2311 2315  
CONNECT 2313 2311 2314  
CONNECT 2314 2313 2315  
CONNECT 2315 2312 2314  
CONNECT 3257 3258

CONNECT 3258 3257 3259 3261  
CONNECT 3259 3258 3260  
CONNECT 3260 3259  
CONNECT 3261 3258 3262  
CONNECT 3262 3261 3264 3263  
CONNECT 3263 3262 3266  
CONNECT 3264 3262 3265  
CONNECT 3265 3264 3266  
CONNECT 3266 3263 3265  
CONNECT 3620 3621  
CONNECT 3621 3620 3622 3624  
CONNECT 3622 3621 3623  
CONNECT 3623 3622  
CONNECT 3624 3621 3625  
CONNECT 3625 3624 3626 3627  
CONNECT 3626 3625 3629  
CONNECT 3627 3625 3628  
CONNECT 3628 3627 3629  
CONNECT 3629 3626 3628  
CONNECT 3650 3651  
CONNECT 3651 3650 3652 3654  
CONNECT 3652 3651 3653  
CONNECT 3653 3652  
CONNECT 3654 3651 3655  
CONNECT 3655 3654 3657 3656  
CONNECT 3656 3655 3659  
CONNECT 3657 3655 3658  
CONNECT 3658 3657 3659  
CONNECT 3659 3656 3658  
CONNECT 3790 3791  
CONNECT 3791 3790 3792 3794  
CONNECT 3792 3791 3793  
CONNECT 3793 3792  
CONNECT 3794 3791 3795  
CONNECT 3795 3794 3796  
CONNECT 3796 3795 3798 3797  
CONNECT 3797 3796  
CONNECT 3798 3796  
CONNECT 3817 3818  
CONNECT 3818 3817 3819 3821  
CONNECT 3819 3818 3820  
CONNECT 3820 3819  
CONNECT 3821 3818 3822  
CONNECT 3822 3821 3823

CONNECT 3823 3822 3825 3824  
CONNECT 3824 3823  
CONNECT 3825 3823  
CONNECT 3946 3947  
CONNECT 3947 3946 3948 3950  
CONNECT 3948 3947 3949  
CONNECT 3949 3948  
CONNECT 3950 3947 3951  
CONNECT 3951 3950 3952 3953  
CONNECT 3952 3951  
CONNECT 3953 3951  
CONNECT 3969 3970  
CONNECT 3970 3969 3973 3971  
CONNECT 3971 3970 3972  
CONNECT 3972 3971  
CONNECT 3973 3970 3974  
CONNECT 3974 3973 3975 3976  
CONNECT 3975 3974  
CONNECT 3976 3974  
CONNECT 4100 4101  
CONNECT 4101 4100 4102 4104  
CONNECT 4102 4101 4103  
CONNECT 4103 4102  
CONNECT 4104 4101 4105  
CONNECT 4105 4104 4106 4107  
CONNECT 4106 4105 4109  
CONNECT 4107 4105 4108  
CONNECT 4108 4107 4109  
CONNECT 4109 4106 4108  
CONNECT 4321 4322  
CONNECT 4322 4321 4323 4325  
CONNECT 4323 4322 4324  
CONNECT 4324 4323  
CONNECT 4325 4322 4326  
CONNECT 4326 4325 4327 4328  
CONNECT 4327 4326 4330  
CONNECT 4328 4326 4329  
CONNECT 4329 4328 4330  
CONNECT 4330 4327 4329  
CONNECT 5021 5022  
CONNECT 5022 5021 5025 5023  
CONNECT 5023 5022 5024  
CONNECT 5024 5023  
CONNECT 5025 5022 5026

CONNECT 5026 5025 5028 5027  
CONNECT 5027 5026 5030  
CONNECT 5028 5026 5029  
CONNECT 5029 5028 5030  
CONNECT 5030 5027 5029  
CONNECT 5160 5161  
CONNECT 5161 5160 5164 5162  
CONNECT 5162 5161 5163  
CONNECT 5163 5162  
CONNECT 5164 5161 5165  
CONNECT 5165 5164 5166 5167  
CONNECT 5166 5165 5169  
CONNECT 5167 5165 5168  
CONNECT 5168 5167 5169  
CONNECT 5169 5166 5168  
CONNECT 6111 6112  
CONNECT 6112 6111 6113 6115  
CONNECT 6113 6112 6114  
CONNECT 6114 6113  
CONNECT 6115 6112 6116  
CONNECT 6116 6115 6118 6117  
CONNECT 6117 6116 6120  
CONNECT 6118 6116 6119  
CONNECT 6119 6118 6120  
CONNECT 6120 6117 6119  
CONNECT 6474 6475  
CONNECT 6475 6474 6476 6478  
CONNECT 6476 6475 6477  
CONNECT 6477 6476  
CONNECT 6478 6475 6479  
CONNECT 6479 6478 6481 6480  
CONNECT 6480 6479 6483  
CONNECT 6481 6479 6482  
CONNECT 6482 6481 6483  
CONNECT 6483 6480 6482  
CONNECT 6504 6505  
CONNECT 6505 6504 6506 6508  
CONNECT 6506 6505 6507  
CONNECT 6507 6506  
CONNECT 6508 6505 6509  
CONNECT 6509 6508 6511 6510  
CONNECT 6510 6509 6513  
CONNECT 6511 6509 6512  
CONNECT 6512 6511 6513

CONNECT 6513 6510 6512  
CONNECT 6644 6645  
CONNECT 6645 6644 6646 6648  
CONNECT 6646 6645 6647  
CONNECT 6647 6646  
CONNECT 6648 6645 6649  
CONNECT 6649 6648 6650  
CONNECT 6650 6649 6652 6651  
CONNECT 6651 6650  
CONNECT 6652 6650  
CONNECT 6671 6672  
CONNECT 6672 6671 6673 6675  
CONNECT 6673 6672 6674  
CONNECT 6674 6673  
CONNECT 6675 6672 6676  
CONNECT 6676 6675 6677  
CONNECT 6677 6676 6679 6678  
CONNECT 6678 6677  
CONNECT 6679 6677  
CONNECT 6800 6801  
CONNECT 6801 6800 6802 6804  
CONNECT 6802 6801 6803  
CONNECT 6803 6802  
CONNECT 6804 6801 6805  
CONNECT 6805 6804 6806 6807  
CONNECT 6806 6805  
CONNECT 6807 6805  
CONNECT 6823 6824  
CONNECT 6824 6823 6827 6825  
CONNECT 6825 6824 6826  
CONNECT 6826 6825  
CONNECT 6827 6824 6828  
CONNECT 6828 6827 6829 6830  
CONNECT 6829 6828  
CONNECT 6830 6828  
CONNECT 6954 6955  
CONNECT 6955 6954 6956 6958  
CONNECT 6956 6955 6957  
CONNECT 6957 6956  
CONNECT 6958 6955 6959  
CONNECT 6959 6958 6960 6961  
CONNECT 6960 6959 6963  
CONNECT 6961 6959 6962  
CONNECT 6962 6961 6963



CONNECT 6963 6960 6962  
CONNECT 7175 7176  
CONNECT 7176 7175 7177 7179  
CONNECT 7177 7176 7178  
CONNECT 7178 7177  
CONNECT 7179 7176 7180  
CONNECT 7180 7179 7181 7182  
CONNECT 7181 7180 7184  
CONNECT 7182 7180 7183  
CONNECT 7183 7182 7184  
CONNECT 7184 7181 7183  
CONNECT 7875 7876  
CONNECT 7876 7875 7879 7877  
CONNECT 7877 7876 7878  
CONNECT 7878 7877  
CONNECT 7879 7876 7880  
CONNECT 7880 7879 7881 7882  
CONNECT 7881 7880 7884  
CONNECT 7882 7880 7883  
CONNECT 7883 7882 7884  
CONNECT 7884 7881 7883  
CONNECT 8014 8015  
CONNECT 8015 8014 8018 8016  
CONNECT 8016 8015 8017  
CONNECT 8017 8016  
CONNECT 8018 8015 8019  
CONNECT 8019 8018 8020 8021  
CONNECT 8020 8019 8023  
CONNECT 8021 8019 8022  
CONNECT 8022 8021 8023  
CONNECT 8023 8020 8022  
CONNECT 8965 8966  
CONNECT 8966 8965 8967 8969  
CONNECT 8967 8966 8968  
CONNECT 8968 8967  
CONNECT 8969 8966 8970  
CONNECT 8970 8969 8972 8971  
CONNECT 8971 8970 8974  
CONNECT 8972 8970 8973  
CONNECT 8973 8972 8974  
CONNECT 8974 8971 8973  
CONNECT 9328 9329  
CONNECT 9329 9328 9330 9332  
CONNECT 9330 9329 9331

CONNECT 9331 9330  
CONNECT 9332 9329 9333  
CONNECT 9333 9332 9335 9334  
CONNECT 9334 9333 9337  
CONNECT 9335 9333 9336  
CONNECT 9336 9335 9337  
CONNECT 9337 9334 9336  
CONNECT 9358 9359  
CONNECT 9359 9358 9360 9362  
CONNECT 9360 9359 9361  
CONNECT 9361 9360  
CONNECT 9362 9359 9363  
CONNECT 9363 9362 9365 9364  
CONNECT 9364 9363 9367  
CONNECT 9365 9363 9366  
CONNECT 9366 9365 9367  
CONNECT 9367 9364 9366  
CONNECT 9498 9499  
CONNECT 9499 9498 9500 9502  
CONNECT 9500 9499 9501  
CONNECT 9501 9500  
CONNECT 9502 9499 9503  
CONNECT 9503 9502 9504  
CONNECT 9504 9503 9506 9505  
CONNECT 9505 9504  
CONNECT 9506 9504  
CONNECT 9525 9526  
CONNECT 9526 9525 9527 9529  
CONNECT 9527 9526 9528  
CONNECT 9528 9527  
CONNECT 9529 9526 9530  
CONNECT 9530 9529 9531  
CONNECT 9531 9530 9533 9532  
CONNECT 9532 9531  
CONNECT 9533 9531  
CONNECT 9654 9655  
CONNECT 9655 9654 9656 9658  
CONNECT 9656 9655 9657  
CONNECT 9657 9656  
CONNECT 9658 9655 9659  
CONNECT 9659 9658 9660 9661  
CONNECT 9660 9659  
CONNECT 9661 9659  
CONNECT 9677 9678

CONNECT 9678 9677 9681 9679  
CONNECT 9679 9678 9680  
CONNECT 9680 9679  
CONNECT 9681 9678 9682  
CONNECT 9682 9681 9683 9684  
CONNECT 9683 9682  
CONNECT 9684 9682  
CONNECT 9808 9809  
CONNECT 9809 9808 9810 9812  
CONNECT 9810 9809 9811  
CONNECT 9811 9810  
CONNECT 9812 9809 9813  
CONNECT 9813 9812 9815 9814  
CONNECT 9814 9813 9817  
CONNECT 9815 9813 9816  
CONNECT 9816 9815 9817  
CONNECT 9817 9814 9816  
CONNECT1002910030  
CONNECT10030100291003310031  
CONNECT100311003010032  
CONNECT1003210031  
CONNECT100331003010034  
CONNECT10034100331003510036  
CONNECT100351003410038  
CONNECT100361003410037  
CONNECT100371003610038  
CONNECT100381003510037  
CONNECT1072910730  
CONNECT10730107291073310731  
CONNECT107311073010732  
CONNECT1073210731  
CONNECT107331073010734  
CONNECT10734107331073510736  
CONNECT107351073410738  
CONNECT107361073410737  
CONNECT107371073610738  
CONNECT107381073510737  
CONNECT1086810869  
CONNECT10869108681087210870  
CONNECT108701086910871  
CONNECT1087110870  
CONNECT108721086910873  
CONNECT10873108721087510874  
CONNECT108741087310877

CONECT108751087310876

CONECT108761087510877

CONECT108771087410876

END
